# Supplementary material for: CD4 T-cell aging exacerbates neuroinflammation in a late-onset mouse model of amyotrophic lateral sclerosis
Source: Springer Nature journal article supplement (doi:10.1186/s12974-023-03007-1), 2024-01-11
Supplement: MOESM1 [file 26618480]

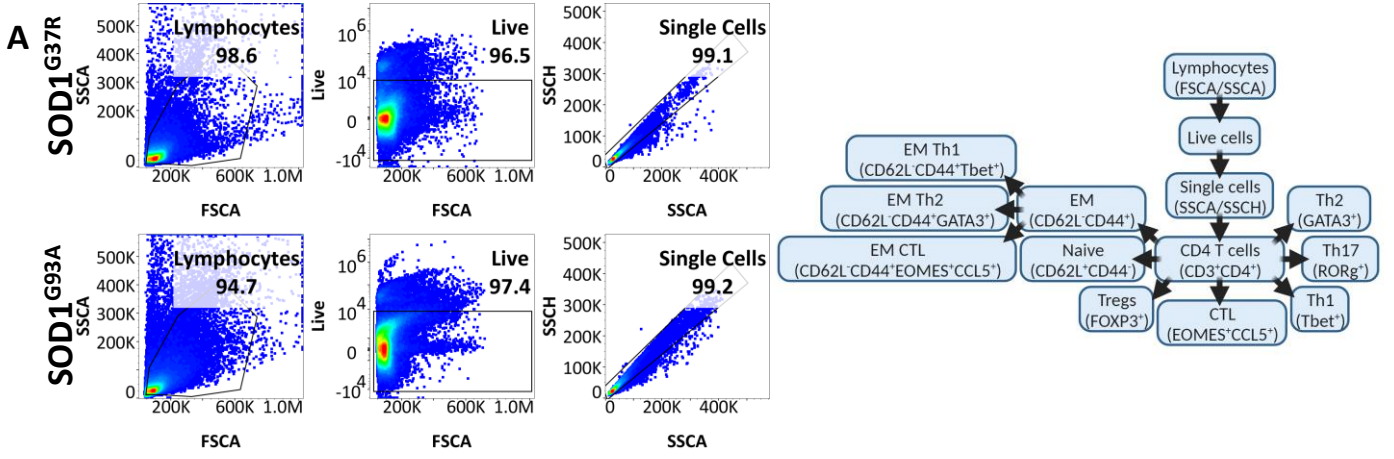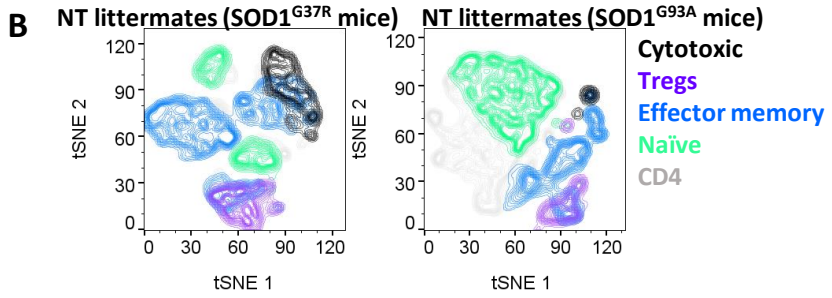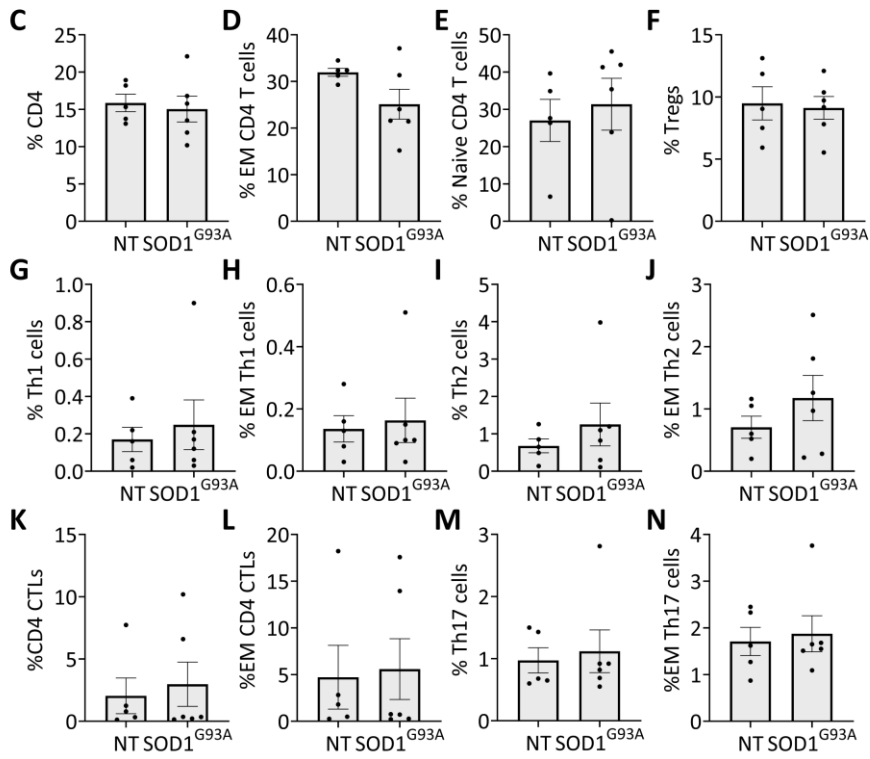

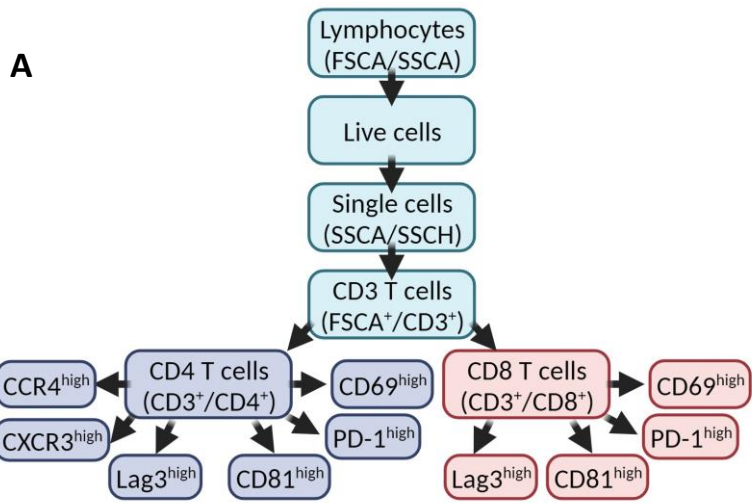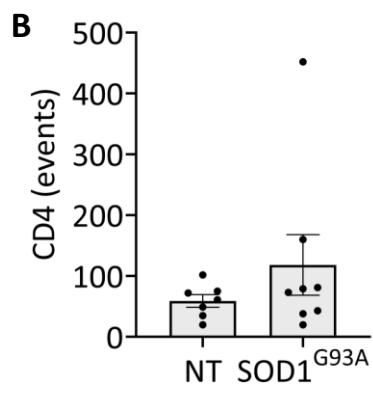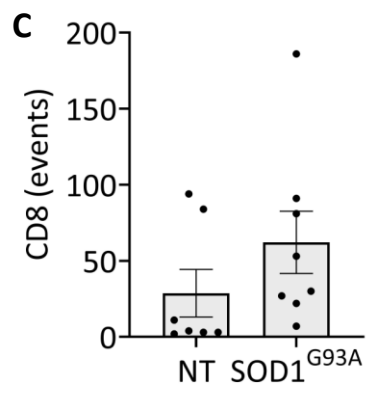

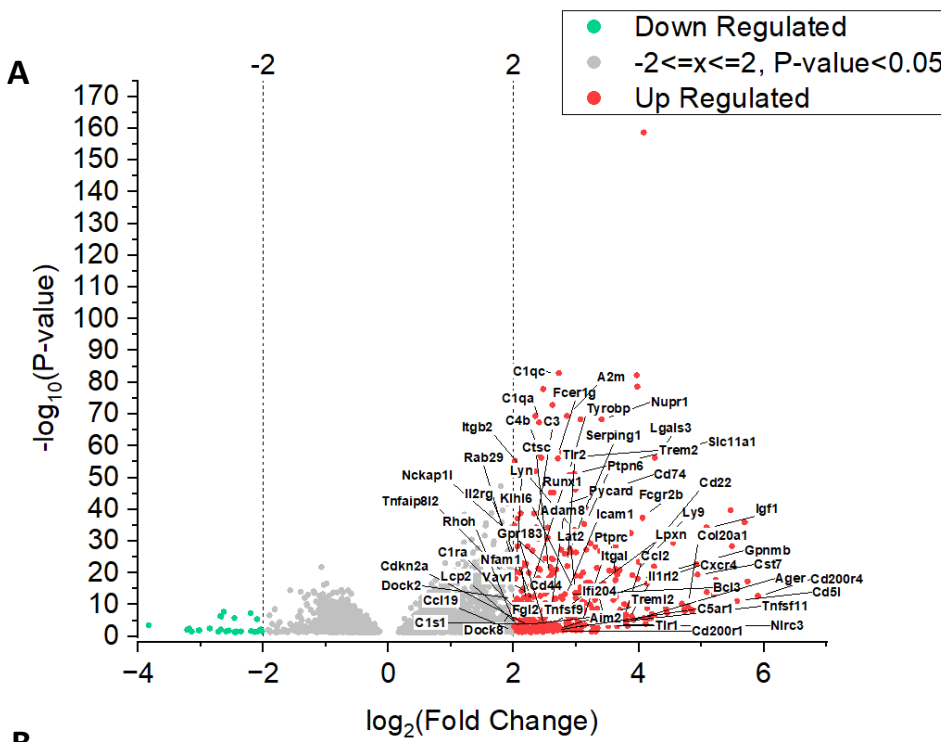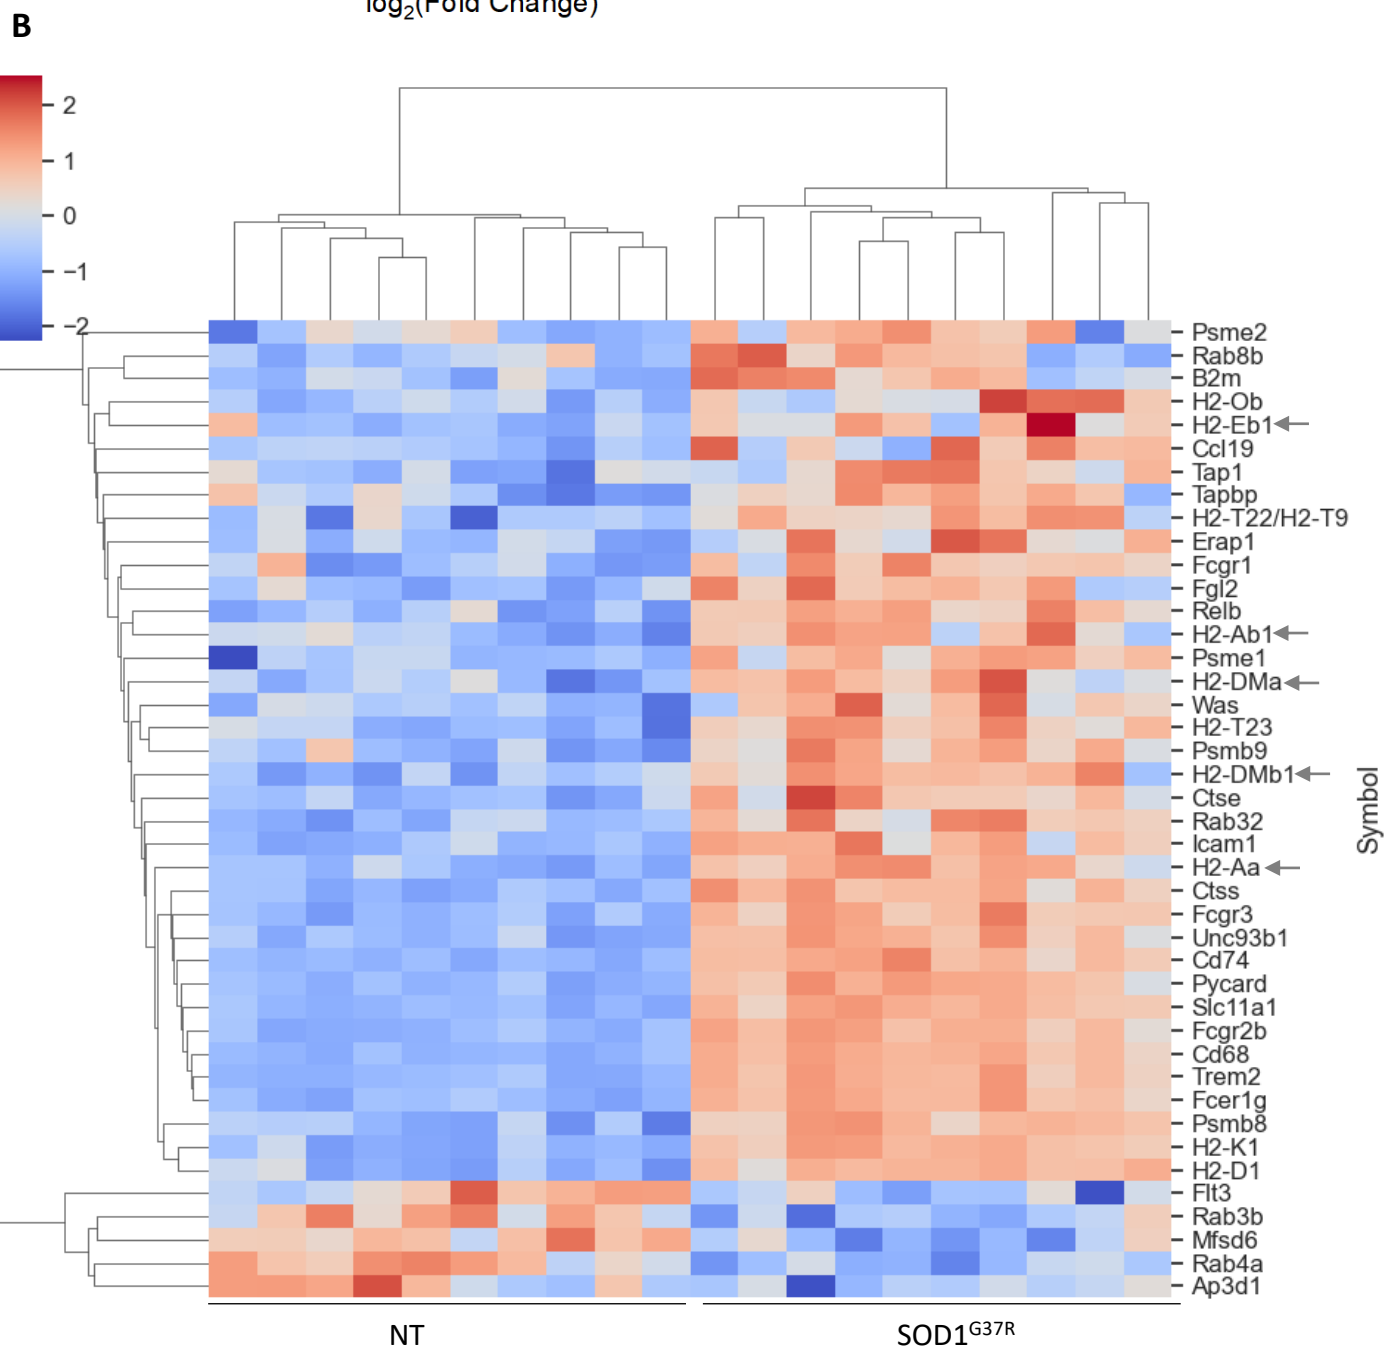

NT

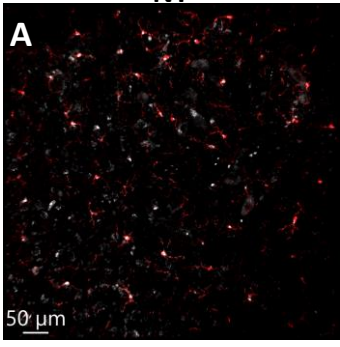

NT

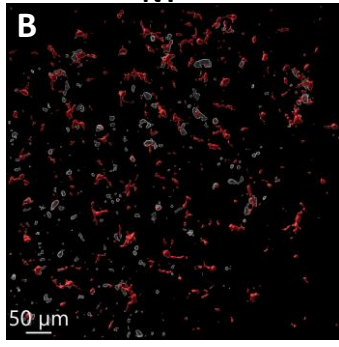

Iba1/CD86/DAPI

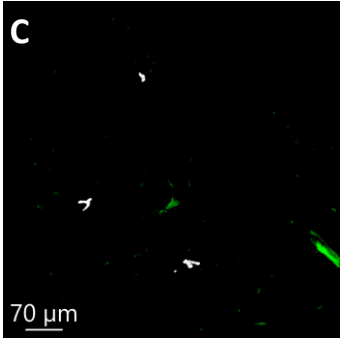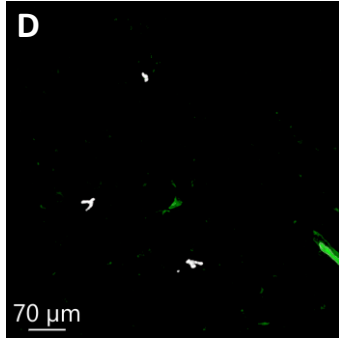

MHCII/B8H10/DAPI
