# Supplementary material for: CD4 T-cell aging exacerbates neuroinflammation in a late-onset mouse model of amyotrophic lateral sclerosis
Source: J Neuroinflammation. 2024 Jan 11;21:17. doi: 10.1186/s12974-023-03007-1 (PMC10782641; doi:10.1186/s12974-023-03007-1)
Supplement: Supplementary file 5 — Additional file 5: Table S4. Differentially expressed genes in lumbar spinal cord sections of SOD1G37R and littermate control mice. Lumbar SC RNA-seq results of 10 SOD1G37R mice and 10 littermate control mice. Genes are detailed with their corresponding ENSEMBL ID and gene symbols, log2 fold change values, and adjusted p-values. Fold change values > 1 suggest upregulation whereas values < − 1 downregulation. Data analysis and organization were executed utilizing the NeatSeq Flow DeSeq2 module. [file 12974_2023_3007_MOESM5_ESM.csv]

	NT1	G37R1	G37R2	G37R3	NT3	NT2	NT4	G37R4	M_NT_4	M_NT_5	M_SOD_4	M_SOD_5	F_NT_6	F_SOD_6	F_NT_1	F_NT_2	F_SOD_1	F_SOD_2	M_NT_3	M_SOD_3	GENENAME	go_id	EVIDENCEALL	ONTOLOGYALL	PFAM	SYMBOL	uniprot	pathway	kegg	ko	pathway_info
ENSMUSG00000000001	3.540750617	3.873307703	3.951736323	3.943646102	3.328196289	3.530750491	3.490946768	3.58589921	3.847957991	3.681876795	3.855726708	3.662781188	3.356609094	4.099189141	3.43073734	3.739136529	3.985277297	3.602400319	3.281856413	3.924981374	guanine nucleotide binding protein (G protein) alpha inhibiting 3	GO:0023051/GO:0016043/GO:0006139/GO:0051179/GO:0046128/GO:0005815/GO:0044237/GO:0016462/GO:0016020/GO:0044093/GO:0005575/GO:1902531/GO:0048583/GO:0006725/GO:0016236/GO:0044238/GO:1902532/GO:0003824/GO:0048523/GO:0016192/GO:1901701/GO:1902494/GO:0006753/GO:0044248/GO:0005856/GO:1903350/GO:0043951/GO:0005886/GO:0016239/GO:0046483/GO:0043228/GO:0003924/GO:0016050/GO:0006163/GO:0016241/GO:0031982/GO:…	IBA/ISO/TAS/IEA/IDA/IPI	BP/CC/MF	PF00503	Gnai3	Q9DC51	path:mmu04934/path:mmu05133/path:mmu04022/path:mmu05170/path:mmu04071/path:mmu04015/path:mmu04540/path:mmu04024/path:mmu04261/path:mmu04724/path:mmu05030/path:mmu05145/path:mmu05012/path:mmu04723/path:mmu04926/path:mmu04924/path:mmu04916/path:mmu05034/path:mmu04371/path:mmu04360/path:mmu04726/path:mmu04914/path:mmu04725/path:mmu04730/path:mmu05163/path:mmu04935/path:mmu04062/path:mmu04727/path:mm…	mmu:14679	ko:K04630	Cushing syndrome - Mus musculus (house mouse)/Pertussis - Mus musculus (house mouse)/cGMP-PKG signaling pathway - Mus musculus (house mouse)/Human immunodeficiency virus 1 infection - Mus musculus (house mouse)/Sphingolipid signaling pathway - Mus musculus (house mouse)/Rap1 signaling pathway - Mus musculus (house mouse)/Gap junction - Mus musculus (house mouse)/cAMP signaling pathway - Mus muscu…
ENSMUSG00000000028	1.718413641	1.538471626	1.724564358	1.833057352	1.55873292	1.488937281	1.57737724	1.872781285	1.80586867	1.384452283	1.650230385	1.557779922	1.477580051	1.800507001	1.486173069	1.624434439	1.606875127	1.629024877	1.662015557	1.786669031	cell division cycle 45	GO:0043226/GO:0045931/GO:0045814/GO:0045934/GO:0043228/GO:0006342/GO:0006281/GO:0005657/GO:0046483/GO:0005656/GO:0006302/GO:0032991/GO:0000228/GO:0043170/GO:0006139/GO:0043138/GO:0033554/GO:0043227/GO:0006260/GO:0000278/GO:0032993/GO:0000727/GO:0042555/GO:0003674/GO:0033044/GO:0006270/GO:0034645/GO:0000082/GO:0048519/GO:0000280/GO:0000808/GO:0010467/GO:0006325/GO:0045892/GO:0036387/GO:0010556/GO:…	ISO/IBA/IEA	CC/BP/MF	PF02724	Cdc45	F8WJ72/Q9Z1X9/Q3UI99	path:mmu04110	mmu:12544	ko:K06628	Cell cycle - Mus musculus (house mouse)
ENSMUSG00000000049	0.259327369	0.239462431	0.139025842	0.263354628	0.295817081	0.36070623	0.302404509	0.142926528	0.295235775	0.229140682	0.478273334	0.310800089	0.145643822	0.431047205	0.184762469	0.193077733	0.15754514	0.14373053	0.150573421	0.314771925	apolipoprotein H	GO:0019433/GO:0050994/GO:0031329/GO:0051179/GO:0051004/GO:0051006/GO:0050996/GO:0051234/GO:0051240/GO:0051239/GO:1990777/GO:1903036/GO:0005615/GO:0065007/GO:0051093/GO:0019216/GO:0051241/GO:0005886/GO:0031325/GO:0046486/GO:2000026/GO:0016788/GO:0031331/GO:0061045/GO:0005515/GO:0005622/GO:0046503/GO:2000145/GO:0043069/GO:0044255/GO:0019222/GO:0006950/GO:0031323/GO:0031638/GO:0030334/GO:0044248/GO:…	ISO/IMP/IDA/IEA	BP/CC/MF	PF09014/PF00084	Apoh	Q9CY42/Q01339	path:mmu04979	mmu:11818	ko:K17305	Cholesterol metabolism - Mus musculus (house mouse)
ENSMUSG00000000056	1.020929563	0.744159965	0.896912012	0.955180048	0.730037205	0.9588163	1.040253143	0.826455196	0.985759502	1.128295377	0.689113416	0.900305982	0.908400791	0.953298543	0.794533149	0.932827826	0.746374323	0.896058851	0.924093034	0.985998773	nuclear prelamin A recognition factor	GO:0043232/GO:0031981/GO:0005652/GO:0034399/GO:0043226/GO:0043233/GO:0005856/GO:0005638/GO:0005882/GO:0043229/GO:0043231/GO:0008150/GO:0003674/GO:0031974/GO:0043227/GO:0099512/GO:0005488/GO:0045111/GO:0099081/GO:0005521/GO:0005575/GO:0043228/GO:0099513/GO:0070013/GO:0005634/GO:0005515/GO:0099080/GO:0005622/GO:0110165/GO:0005730	ISO/IBA/ND	CC/BP/MF	PF02256/PF02906	Narf	Q9CYQ7		mmu:67608
ENSMUSG00000000058	5.044896192	5.243364388	5.716282486	5.548420181	3.975787328	4.939437205	4.602127785	5.017471646	5.192028121	4.798635705	5.658724604	5.41478651	4.735490901	5.71258234	4.554992865	4.967342652	5.888718083	5.499701488	3.833752222	5.343714454	caveolin 2	GO:0051817/GO:0098590/GO:0031226/GO:0031224/GO:0098857/GO:0099536/GO:0051716/GO:0051702/GO:0044794/GO:0098916/GO:0044766/GO:0098589/GO:0031234/GO:0009987/GO:0032991/GO:1903829/GO:0044267/GO:0051851/GO:0031323/GO:0044791/GO:0044764/GO:0016043/GO:0023056/GO:0098562/GO:0006464/GO:0044789/GO:0044788/GO:0006898/GO:0007154/GO:0051704/GO:0031090/GO:0048518/GO:0060538/GO:0099503/GO:0006468/GO:0044853/GO:…	ISO/ISS/IBA/TAS/IMP/IDA/IGI/IEA/IPI	BP/CC/MF	PF01146	Cav2	Q9WVC3/Q924U4	path:mmu05418/path:mmu04510/path:mmu04144/path:mmu05100/path:mmu05020/path:mmu05205	mmu:12390	ko:K12958	Fluid shear stress and atherosclerosis - Mus musculus (house mouse)/Focal adhesion - Mus musculus (house mouse)/Endocytosis - Mus musculus (house mouse)/Bacterial invasion of epithelial cells - Mus musculus (house mouse)/Prion disease - Mus musculus (house mouse)/Proteoglycans in cancer - Mus musculus (house mouse)
ENSMUSG00000000078	3.765741284	3.754210072	3.927746866	3.792701774	3.509450239	3.927361101	3.767240609	3.463878778	3.775221011	3.690078526	3.978428583	3.788194488	3.33356304	4.465972276	3.65892686	3.441188957	4.039262501	4.177967783	3.446061316	3.893607098	Kruppel-like factor 6	GO:0006366/GO:0007165/GO:0006807/GO:0005575/GO:0051173/GO:0007166/GO:0007154/GO:0006355/GO:0044249/GO:0006725/GO:0080090/GO:0043233/GO:0051240/GO:0005737/GO:0043169/GO:0065007/GO:0005622/GO:0043170/GO:0034641/GO:0097709/GO:0043226/GO:0032501/GO:2001141/GO:0097659/GO:0051252/GO:0044260/GO:0018130/GO:0034097/GO:0071345/GO:0016070/GO:0019222/GO:0043227/GO:0051254/GO:0005730/GO:0034105/GO:0031328/GO:…	ISO/IDA/IBA/IMP/IEA/ISS	BP/CC/MF	PF00096	Klf6	Q8BPQ2		mmu:23849	ko:K09207
ENSMUSG00000000085	4.544693018	4.525928033	4.650266856	4.716349535	4.380325738	4.550384772	4.784563677	4.975750712	4.27240642	4.541181054	4.841389247	4.608717085	4.727717406	4.43885194	4.630927489	5.001664036	4.701209532	4.649079258	4.680173438	4.694838721	sex comb on midleg homolog 1	GO:0048856/GO:0034641/GO:0043226/GO:0019219/GO:0007276/GO:0000003/GO:0034645/GO:0046483/GO:0005575/GO:0007275/GO:0071704/GO:0048609/GO:0043227/GO:0019222/GO:0010605/GO:0010556/GO:0010558/GO:0071840/GO:0043232/GO:0048232/GO:0048523/GO:0006351/GO:0008152/GO:0003002/GO:0032774/GO:0008150/GO:0005515/GO:0045934/GO:0007283/GO:0043170/GO:0031326/GO:0045892/GO:0044703/GO:0005622/GO:1901360/GO:0065007/GO:…	IMP/IEA/IDA/NAS/IGI/IPI	BP/CC/MF	PF12140/PF17208/PF02820/PF00536	Scmh1	Q8K214		mmu:29871	ko:K11461
ENSMUSG00000000088	9.938537397	9.798162539	9.67659223	9.802373339	10.12999605	9.959577482	9.830929571	9.922277227	9.896503987	10.01851417	9.677489195	9.895420784	10.20563671	9.637028964	9.925429493	9.813612956	9.65426797	9.757026823	9.930306432	9.674981322	cytochrome c oxidase subunit 5A	GO:0009055/GO:0008324/GO:0098798/GO:0009058/GO:0006810/GO:0098800/GO:0006725/GO:0015075/GO:0006164/GO:0015318/GO:0015985/GO:0006796/GO:0006753/GO:0016020/GO:0006091/GO:0005751/GO:0015078/GO:0006811/GO:0008150/GO:0016491/GO:0031967/GO:0006807/GO:0022857/GO:0006754/GO:0015077/GO:0031966/GO:0098803/GO:0098796/GO:0015672/GO:0019693/GO:0019637/GO:0015002/GO:0019866/GO:0022900/GO:0098662/GO:0006793/GO:…	ISO/IBA/HDA/IEA/IDA	MF/CC/BP	PF02284	Cox5a	P12787	path:mmu05415/path:mmu04932/path:mmu04260/path:mmu04714/path:mmu01100/path:mmu05012/path:mmu05020/path:mmu05010/path:mmu05014/path:mmu05022/path:mmu00190/path:mmu05208/path:mmu05016	mmu:12858	ko:K02264	Diabetic cardiomyopathy - Mus musculus (house mouse)/Non-alcoholic fatty liver disease - Mus musculus (house mouse)/Cardiac muscle contraction - Mus musculus (house mouse)/Thermogenesis - Mus musculus (house mouse)/Metabolic pathways - Mus musculus (house mouse)/Parkinson disease - Mus musculus (house mouse)/Prion disease - Mus musculus (house mouse)/Alzheimer disease - Mus musculus (house mouse)…
ENSMUSG00000000093	1.305575511	1.644473877	1.2664004	1.347857048	1.313475466	1.255111521	1.215618998	1.282097543	1.163199052	1.339650601	1.04848361	1.095106961	1.422207777	1.448359096	1.175707983	1.311430268	1.475359999	1.178664586	1.106640174	1.270098939	T-box 2	GO:0034654/GO:0010467/GO:0050794/GO:2000113/GO:0051173/GO:2000112/GO:0007389/GO:0007275/GO:0051172/GO:0035050/GO:0060255/GO:0014706/GO:0032774/GO:0035051/GO:0044238/GO:0022603/GO:0050793/GO:0007368/GO:0048513/GO:0043229/GO:0010629/GO:0048562/GO:0018130/GO:0008150/GO:0043227/GO:0009889/GO:0048565/GO:0005515/GO:0110165/GO:0032502/GO:1901360/GO:0006139/GO:0014855/GO:0016070/GO:0023052/GO:0050789/GO:…	ISO/IEA/IGI/IBA/IMP/IDA/IPI	BP/CC/MF	PF00907/PF12598	Tbx2	Q60707/Q3UET7		mmu:21385	ko:K10176
ENSMUSG00000000120	2.87267097	2.712041485	2.853306196	2.874601486	2.80006073	3.066113307	2.529925643	2.822977271	2.695608362	3.019903886	2.75956954	2.975353314	2.685472763	2.95862912	2.809133279	2.520329612	3.309971956	3.111626885	2.723280725	3.278006349	nerve growth factor receptor (TNFR superfamily member 16)	GO:0005886/GO:0007267/GO:0048585/GO:2001233/GO:0007275/GO:0042127/GO:0007409/GO:0048646/GO:0051641/GO:0010604/GO:0007268/GO:0007266/GO:0016525/GO:0031325/GO:0034504/GO:0048856/GO:0007399/GO:0031175/GO:1901362/GO:0045682/GO:0062197/GO:0031323/GO:0045666/GO:0061564/GO:0033365/GO:0007264/GO:1903508/GO:1902895/GO:0097708/GO:0043226/GO:0031326/GO:0090304/GO:2001235/GO:0033554/GO:0048731/GO:0040037/GO:…	IBA/ISO/IMP/IDA/IEA/IPI/IEP	CC/BP/MF	PF00020/PF18422/PF00531	Ngfr	Q8CFT3
ENSMUSG00000000125	2.870306355	2.995269221	2.681240197	2.767187589	2.695698777	3.118318983	2.564182624	2.568076343	2.875370269	3.264865148	2.291998619	2.764869529	2.366760203	2.917894245	2.87224011	3.18487308	2.86900674	2.811889962	2.699052023	2.510868744	wingless-type MMTV integration site family member 3	GO:0051239/GO:0035137/GO:0001706/GO:0051270/GO:0032501/GO:0010977/GO:0007267/GO:0001704/GO:0032879/GO:0048518/GO:0090066/GO:0007165/GO:0010771/GO:0007166/GO:0048332/GO:0048699/GO:0048513/GO:0048856/GO:0023051/GO:0010770/GO:0010976/GO:0048675/GO:0009966/GO:0005615/GO:0016049/GO:0048672/GO:0048729/GO:0023052/GO:0005622/GO:0048670/GO:0016043/GO:0032502/GO:0009790/GO:0006935/GO:0031345/GO:0007154/GO:…	ISO/IMP/IDA/IGI/IBA/TAS/IEA/IPI	BP/CC/MF	PF00110	Wnt3	Q3TQ59/P17553/A2A649	path:mmu05206/path:mmu05200/path:mmu05022/path:mmu04150/path:mmu05165/path:mmu04550/path:mmu05225/path:mmu05010/path:mmu05205/path:mmu04934/path:mmu05226/path:mmu04916/path:mmu04310/path:mmu04390/path:mmu05217/path:mmu05224	mmu:22415	ko:K00312	MicroRNAs in cancer - Mus musculus (house mouse)/Pathways in cancer - Mus musculus (house mouse)/Pathways of neurodegeneration - multiple diseases - Mus musculus (house mouse)/mTOR signaling pathway - Mus musculus (house mouse)/Human papillomavirus infection - Mus musculus (house mouse)/Signaling pathways regulating pluripotency of stem cells - Mus musculus (house mouse)/Hepatocellular carcinoma …
ENSMUSG00000000126	1.386639233	1.768399484	1.296383584	1.436933768	1.698446156	1.436395094	1.420983703	1.871089418	1.721443702	1.752367604	1.295516994	1.454434211	1.283185068	1.575201084	1.379346452	1.522047132	1.409522814	1.528922615	1.86524991	1.762386332	wingless-type MMTV integration site family member 9A	GO:0007154/GO:0008283/GO:0051241/GO:0009987/GO:0032330/GO:0009967/GO:0051248/GO:0045595/GO:0032501/GO:0051346/GO:2000117/GO:0051216/GO:0005576/GO:0006915/GO:0043170/GO:0008219/GO:2000026/GO:0032269/GO:0052547/GO:0007049/GO:0051716/GO:0051246/GO:0008150/GO:0007275/GO:0009966/GO:0003674/GO:0031324/GO:0051336/GO:0098772/GO:0042127/GO:0065007/GO:0048598/GO:0048568/GO:0006508/GO:0043154/GO:0051726/GO:…	IMP/ISO/IGI/IDA/IEA/IBA/IPI	BP/CC/MF	PF00110	Wnt9a	Q8R5M2	path:mmu04390/path:mmu05165/path:mmu05010/path:mmu05224/path:mmu05226/path:mmu05022/path:mmu05205/path:mmu04916/path:mmu05200/path:mmu04310/path:mmu05225/path:mmu04550/path:mmu05217/path:mmu04934/path:mmu04150	mmu:216795	ko:K01064	Hippo signaling pathway - Mus musculus (house mouse)/Human papillomavirus infection - Mus musculus (house mouse)/Alzheimer disease - Mus musculus (house mouse)/Breast cancer - Mus musculus (house mouse)/Gastric cancer - Mus musculus (house mouse)/Pathways of neurodegeneration - multiple diseases - Mus musculus (house mouse)/Proteoglycans in cancer - Mus musculus (house mouse)/Melanogenesis - Mus …
ENSMUSG00000000127	2.723002464	2.871535163	2.397855752	2.801864063	2.548299752	2.58326354	2.773358041	2.556231866	2.446423044	2.481000178	2.815898737	2.799544933	2.756956534	2.501478398	2.344947774	2.712476577	2.851511238	2.787373768	2.736880628	2.56370426	fer (fms/fps related) protein kinase	GO:0030154/GO:0007154/GO:0002697/GO:0060627/GO:0031252/GO:0008150/GO:0048583/GO:0002695/GO:0043412/GO:0060341/GO:0018108/GO:1901652/GO:0043303/GO:0051179/GO:0038109/GO:0017157/GO:0002699/GO:0048518/GO:0010591/GO:0005515/GO:0043933/GO:0061024/GO:0030335/GO:0030054/GO:0060491/GO:0010468/GO:0017016/GO:0017137/GO:0005886/GO:0051092/GO:0065003/GO:0030334/GO:0019538/GO:0043304/GO:0005575/GO:0048008/GO:…	IMP/IBA/ISO/IDA/IEA/IPI	BP/CC/MF	PF00017/PF07714/PF00611	Fer	P70451/Q3TZJ5/Q3TME9	path:mmu04520	mmu:14158	ko:K08889	Adherens junction - Mus musculus (house mouse)
ENSMUSG00000000131	5.977250623	6.130757175	6.161981181	5.831571248	6.172779906	5.894582658	5.786096965	6.352625549	6.195819485	6.152094876	5.911567115	6.31177155	6.056551322	6.172472562	5.94753566	6.084477769	6.067690185	6.147910891	6.146386903	6.107602066	exportin 6	GO:0051179/GO:0006810/GO:0046907/GO:0008150/GO:0045184/GO:0005634/GO:0051649/GO:0034613/GO:0006913/GO:0008104/GO:0006886/GO:0005622/GO:0006611/GO:0033036/GO:0005737/GO:0043228/GO:0051020/GO:0015031/GO:0070727/GO:0032991/GO:0051168/GO:0043232/GO:0070013/GO:0015833/GO:0031981/GO:0005730/GO:0051169/GO:0017016/GO:0043227/GO:0005886/GO:0043231/GO:0031267/GO:0071944/GO:0071705/GO:0016020/GO:0051234/GO:…	IMP/IBA/IEA/ISO	BP/CC/MF	PF03810/PF08389	Xpo6	Q924Z6	path:mmu03013	mmu:74204	ko:K25204	Nucleocytoplasmic transport - Mus musculus (house mouse)
ENSMUSG00000000134	5.529884215	5.983755436	5.527299386	6.10193503	5.815677879	5.255845983	5.86559864	5.811279944	5.534164245	5.646225977	5.735911119	5.916590296	5.840854607	5.632402719	5.966291671	5.61506174	5.81277502	5.507720564	5.808558611	5.827461345	transcription factor E3	GO:0009059/GO:1901362/GO:0044237/GO:0010628/GO:0001012/GO:0044238/GO:0048519/GO:0048518/GO:0000978/GO:0034641/GO:0071704/GO:0010604/GO:0001216/GO:0009889/GO:0006355/GO:0000981/GO:0006357/GO:0001067/GO:0044260/GO:0051254/GO:0060255/GO:0048522/GO:1902680/GO:0031328/GO:0002520/GO:0005829/GO:0009893/GO:0045944/GO:0010468/GO:0048856/GO:0010557/GO:0070013/GO:0009891/GO:0032774/GO:0048871/GO:0000976/GO:…	IMP/ISO/IDA/IEA/IGI/IC/IPI	BP/MF/CC	PF00010/PF11851/PF15951	Tfe3	Q8K420/Q64092/A2AEW1/A2AEW0/Q3U1L5	path:mmu04137/path:mmu05211/path:mmu05202	mmu:209446	ko:K09105	Mitophagy - animal - Mus musculus (house mouse)/Renal cell carcinoma - Mus musculus (house mouse)/Transcriptional misregulation in cancer - Mus musculus (house mouse)
ENSMUSG00000000142	4.018740398	4.027918637	4.158289128	4.016264003	3.86187828	3.906949136	3.803867449	3.987387598	4.117422014	4.032795365	3.868598932	3.870749565	4.16672017	3.745454682	3.652908876	3.796254013	3.928534484	3.67242328	4.122048692	3.973001391	axin 2	GO:0034655/GO:1905114/GO:0050794/GO:0051094/GO:0005634/GO:0050793/GO:0034641/GO:0007166/GO:1903311/GO:0044389/GO:0009987/GO:0034613/GO:0007059/GO:0001934/GO:0048646/GO:0009653/GO:0001957/GO:0010564/GO:0051276/GO:0005622/GO:0008150/GO:0048645/GO:0007049/GO:0072359/GO:0051093/GO:0070601/GO:1903312/GO:0043570/GO:0065009/GO:0051252/GO:0001932/GO:0043412/GO:0048468/GO:0031324/GO:0033554/GO:0031323/GO:…	ISO/IDA/IEA/IMP/IGI/IPI	BP/CC/MF	PF08833/PF16646/PF00778/PF00615	Axin2	Q3UQK5/O88566	path:mmu05213/path:mmu04550/path:mmu05022/path:mmu05165/path:mmu05217/path:mmu05210/path:mmu05225/path:mmu05224/path:mmu05200/path:mmu04934/path:mmu05010/path:mmu04390/path:mmu05226/path:mmu04310	mmu:12006	ko:K04385	Endometrial cancer - Mus musculus (house mouse)/Signaling pathways regulating pluripotency of stem cells - Mus musculus (house mouse)/Pathways of neurodegeneration - multiple diseases - Mus musculus (house mouse)/Human papillomavirus infection - Mus musculus (house mouse)/Basal cell carcinoma - Mus musculus (house mouse)/Colorectal cancer - Mus musculus (house mouse)/Hepatocellular carcinoma - Mu…
ENSMUSG00000000148	3.840822328	4.223881148	3.727338858	3.788484418	3.487300853	3.257537702	3.219257978	3.567448979	3.579394592	3.369344776	3.561332702	4.114673949	2.985841987	3.554216041	3.579503355	3.729222434	3.506004787	3.621404391	3.379999199	3.447663201	BRCA1-associated ATM activator 1	GO:0006468/GO:0006974/GO:0031325/GO:0043226/GO:0070013/GO:0065007/GO:0031401/GO:0043227/GO:0008150/GO:0051247/GO:0043229/GO:0008152/GO:0006928/GO:0006464/GO:0051173/GO:0030307/GO:0016477/GO:0060255/GO:0031323/GO:0006807/GO:0031399/GO:0031974/GO:0016049/GO:0009987/GO:0006006/GO:0071704/GO:0050794/GO:0033554/GO:0042325/GO:0040011/GO:0005622/GO:0032270/GO:0005996/GO:0019318/GO:0051716/GO:0009628/GO:…	ISO/IDA	BP/CC	PF02985	Brat1	E9QLK3/Q8C3R1		mmu:231841	ko:K23112
ENSMUSG00000000149	7.345410186	7.340190404	7.402218754	7.949947986	7.307051547	7.482611293	6.976825248	7.355714912	7.160530378	7.169485356	7.669784309	7.822371526	7.299214034	7.473316389	7.236699356	7.556062114	7.674750125	7.700965828	7.515658558	7.361673869	guanine nucleotide binding protein alpha 12	GO:0035108/GO:1902494/GO:0032991/GO:0035556/GO:0044265/GO:0001701/GO:0001883/GO:0044260/GO:0032879/GO:0016462/GO:0098552/GO:0016787/GO:0035107/GO:0003674/GO:0098590/GO:0003824/GO:0009894/GO:1901564/GO:0016817/GO:0044237/GO:0000166/GO:0007266/GO:0098562/GO:0098796/GO:0001882/GO:0044257/GO:0008150/GO:0040012/GO:0016020/GO:0015629/GO:0016818/GO:0016477/GO:0097478/GO:0006928/GO:0044267/GO:0044238/GO:…	IGI/TAS/IBA/ISO/IMP/IEA/ISA/IDA	BP/CC/MF	PF00503	Gna12	P27600	path:mmu05200/path:mmu05163/path:mmu04730/path:mmu04010/path:mmu04270/path:mmu04810/path:mmu04071/path:mmu04928/path:mmu04022/path:mmu04072	mmu:14673	ko:K04346	Pathways in cancer - Mus musculus (house mouse)/Human cytomegalovirus infection - Mus musculus (house mouse)/Long-term depression - Mus musculus (house mouse)/MAPK signaling pathway - Mus musculus (house mouse)/Vascular smooth muscle contraction - Mus musculus (house mouse)/Regulation of actin cytoskeleton - Mus musculus (house mouse)/Sphingolipid signaling pathway - Mus musculus (house mouse)/Pa…
ENSMUSG00000000154	2.660231394	3.014866257	2.952746165	2.804206625	2.40234964	2.707976489	2.694785131	2.620976038	2.443644794	2.307656511	2.918161816	3.290899063	2.6855681	3.451783612	2.634224191	2.442688506	2.85580787	3.058957546	2.584314801	2.989545727	solute carrier family 22 (organic cation transporter) member 18	GO:0043229/GO:0055085/GO:1990961/GO:0071944/GO:0008514/GO:0140352/GO:0022857/GO:0051179/GO:0110165/GO:0140115/GO:0008509/GO:0008150/GO:0009636/GO:0006811/GO:0044389/GO:0098590/GO:0012505/GO:0009987/GO:0043231/GO:0005887/GO:0031975/GO:0022804/GO:0005886/GO:0051234/GO:0016020/GO:0043227/GO:0015293/GO:0042221/GO:0003674/GO:0098754/GO:0005635/GO:0045177/GO:0016021/GO:0031224/GO:0043226/GO:0006820/GO:…	ISO/ISS/TAS/IBA/IEA	CC/BP/MF	PF07690	Slc22a18	Q78KK3/A0A0R4J0P7		mmu:18400	ko:K08214
ENSMUSG00000000167	-0.06113023	-0.111293324	0.054384498	0.102416998	-0.12133584	0.194715497	-0.140258044	-0.113968106	0.048349107	-0.119430267	-0.068213547	-0.028701567	0.366785491	-0.126890233	-0.078053071	-0.069555499	-0.108772892	0.054055576	-0.113014965	-0.025953956	PIH1 domain containing 2	GO:0005737/GO:0006139/GO:0005622/GO:0016043/GO:0006364/GO:0032991/GO:0003674/GO:0009987/GO:0017016/GO:0016070/GO:0019899/GO:0043933/GO:0071704/GO:0006396/GO:0110165/GO:0000492/GO:0016072/GO:0031267/GO:0022607/GO:0000491/GO:0005575/GO:1901360/GO:0010467/GO:0022618/GO:0022613/GO:0006725/GO:0005488/GO:0051020/GO:0044085/GO:0046483/GO:0017160/GO:0044238/GO:0008150/GO:0071826/GO:0090304/GO:0065003/GO:…	IBA/ISO	CC/BP/MF	PF08190/PF18201	Pih1d2	Q8CHR9		mmu:72614	ko:K25427
ENSMUSG00000000168	4.235202584	4.383076682	4.749641267	4.145189141	4.355488553	4.397087367	4.845170107	4.61234995	4.970668023	4.650549559	4.504159584	4.197086288	4.42365086	4.415174253	5.280046712	4.427842431	4.372883782	4.331648348	4.258199518	4.043092445	dihydrolipoamide S-acetyltransferase (E2 component of pyruvate dehydrogenase complex)	GO:0009260/GO:0043604/GO:0072521/GO:0006790/GO:0006753/GO:0015980/GO:0071704/GO:0005575/GO:0033865/GO:0016407/GO:0033866/GO:0009987/GO:0005967/GO:0005622/GO:0003824/GO:0044237/GO:0140096/GO:0044249/GO:0110165/GO:0016746/GO:0005739/GO:0034641/GO:1901137/GO:0016740/GO:0016668/GO:0006807/GO:0034032/GO:0005759/GO:0006099/GO:0034033/GO:0043603/GO:1901135/GO:0003674/GO:0034603/GO:0044238/GO:0034604/GO:…	ISO/IC/IEA/TAS/HDA	BP/CC/MF	PF00198/PF02817/PF00364	Dlat	Q8BMF4	path:mmu00010/path:mmu01100/path:mmu00620/path:mmu01200/path:mmu00020	mmu:235339	ko:K00627	Glycolysis / Gluconeogenesis - Mus musculus (house mouse)/Metabolic pathways - Mus musculus (house mouse)/Pyruvate metabolism - Mus musculus (house mouse)/Carbon metabolism - Mus musculus (house mouse)/Citrate cycle (TCA cycle) - Mus musculus (house mouse)
ENSMUSG00000000171	7.388645081	7.241438119	7.334112985	7.553908811	7.390828495	7.396272985	7.326078123	7.486409225	7.582609685	7.317290834	7.420573368	7.39588526	7.26994676	7.446070047	7.535627417	7.116387756	7.325782324	7.521175664	7.165099348	7.14824887	succinate dehydrogenase complex subunit D integral membrane protein	GO:0016635/GO:0110165/GO:0005737/GO:0009259/GO:0098803/GO:0045333/GO:0044271/GO:0045281/GO:0006811/GO:0042775/GO:0098798/GO:0098662/GO:0043231/GO:0005743/GO:0016491/GO:0006091/GO:0070482/GO:0043226/GO:0015844/GO:0090407/GO:0016020/GO:0005746/GO:0043169/GO:0006807/GO:0098800/GO:0031967/GO:1903530/GO:0009260/GO:0015837/GO:0016021/GO:0032940/GO:0098655/GO:0042221/GO:0045283/GO:0006810/GO:1902600/GO:…	IMP/HDA/IBA/ISO/IEA/IDA	MF/CC/BP		Sdhd	Q9CXV1	path:mmu05415/path:mmu05014/path:mmu00020/path:mmu04932/path:mmu05022/path:mmu01200/path:mmu05208/path:mmu01100/path:mmu05020/path:mmu04714/path:mmu00190/path:mmu05012/path:mmu05016/path:mmu05010	mmu:66925	ko:K00237	Diabetic cardiomyopathy - Mus musculus (house mouse)/Amyotrophic lateral sclerosis - Mus musculus (house mouse)/Citrate cycle (TCA cycle) - Mus musculus (house mouse)/Non-alcoholic fatty liver disease - Mus musculus (house mouse)/Pathways of neurodegeneration - multiple diseases - Mus musculus (house mouse)/Carbon metabolism - Mus musculus (house mouse)/Chemical carcinogenesis - reactive oxygen s…
ENSMUSG00000000184	5.710028124	6.48826689	6.620833758	6.361109123	5.759794854	6.171493892	5.467474296	5.925263463	5.950899572	4.97022531	6.658624373	6.303834138	5.410910398	6.629932154	5.495038523	5.870115456	6.727646028	6.33596759	5.797407818	6.360309475	cyclin D2	GO:1902808/GO:1902806/GO:0044237/GO:1902554/GO:0051716/GO:0031975/GO:0019900/GO:0005488/GO:0044238/GO:0051347/GO:0045787/GO:0006793/GO:1902494/GO:0007346/GO:0000278/GO:0008150/GO:0000280/GO:0071840/GO:0006796/GO:0008152/GO:0007049/GO:0045859/GO:0004693/GO:0000307/GO:0071704/GO:0004674/GO:0045737/GO:0065007/GO:0061695/GO:0022402/GO:1902911/GO:0044260/GO:0051338/GO:0051726/GO:0004672/GO:0000082/GO:…	ISO/IBA/IMP/IDA/IPI/IEA	BP/CC/MF	PF00134/PF02984	Ccnd2	P30280/Q4FK45	path:mmu04310/path:mmu05203/path:mmu05165/path:mmu04630/path:mmu04218/path:mmu04151/path:mmu05166/path:mmu04390/path:mmu05206/path:mmu04510/path:mmu04110/path:mmu05202/path:mmu04340/path:mmu04917/path:mmu05200/path:mmu04068/path:mmu05169/path:mmu05162/path:mmu04115	mmu:12444	ko:K10151	Wnt signaling pathway - Mus musculus (house mouse)/Viral carcinogenesis - Mus musculus (house mouse)/Human papillomavirus infection - Mus musculus (house mouse)/JAK-STAT signaling pathway - Mus musculus (house mouse)/Cellular senescence - Mus musculus (house mouse)/PI3K-Akt signaling pathway - Mus musculus (house mouse)/Human T-cell leukemia virus 1 infection - Mus musculus (house mouse)/Hippo si…
ENSMUSG00000000194	4.673928386	5.131660048	4.653112319	5.117779351	4.670092329	4.740796132	4.81570096	4.680113027	4.483335899	4.443497703	4.891356304	5.120016911	4.673778368	4.872701962	5.110251765	5.257372356	5.437460062	4.963588477	4.716755966	4.858708415	G protein-coupled receptor 107	GO:0005575/GO:0043226/GO:0051179/GO:0005737/GO:0071944/GO:0005886/GO:0005769/GO:0005622/GO:0031974/GO:0043229/GO:0071840/GO:0043227/GO:0005773/GO:0005768/GO:0030276/GO:0009987/GO:0110165/GO:0031982/GO:0072583/GO:0097708/GO:0031224/GO:0006898/GO:0030136/GO:0016020/GO:0006810/GO:0006996/GO:0016050/GO:0016192/GO:0031410/GO:0006900/GO:0030135/GO:0061024/GO:0010324/GO:0032050/GO:0006897/GO:0005488/GO:…	ISO/IDA/IMP/IEA/IPI	CC/BP/MF	PF06814	Gpr107	Q8BUV8/Q148Z6		mmu:277463	ko:K22985
ENSMUSG00000000197	4.348511271	3.762687955	4.274027358	3.787841615	4.023966984	4.341251681	4.404770519	4.356914638	4.389297639	4.421132519	4.285598215	3.76766855	4.314745069	3.825679792	4.232743255	4.385667853	3.977003855	3.751210407	4.056671474	4.410115014	sodium leak channel non-selective	GO:0015075/GO:0098655/GO:0034220/GO:0015081/GO:0022857/GO:0015077/GO:0008324/GO:0072511/GO:0060075/GO:0009987/GO:0050794/GO:0098662/GO:0022842/GO:0022803/GO:0071805/GO:0016021/GO:0006812/GO:0022890/GO:0070838/GO:0015267/GO:0015672/GO:0065007/GO:0051234/GO:0032879/GO:0098660/GO:0110165/GO:0022832/GO:0003674/GO:0070588/GO:0006810/GO:0030001/GO:0006811/GO:0051179/GO:0055085/GO:0034765/GO:0031224/GO:…	IDA/IEA/IMP/IPI	MF/BP/CC	PF00520	Nalcn	Q8BXR5/E9QLE4		mmu:338370	ko:K21863
ENSMUSG00000000202	6.430731283	6.332734761	6.201349073	6.007371517	7.216934008	6.590180992	6.525766936	6.086298009	6.391150785	6.681315116	6.093539127	6.428568156	6.886571006	5.864403522	6.757616437	6.797778791	6.183818819	6.185001281	6.933703889	6.261746734	BTB (POZ) domain containing 17	GO:0005576/GO:0005575/GO:0003674/GO:0008150/GO:0110165	IEA/ND	CC/MF/BP	PF00651/PF07707	Btbd17	Q9DB72		mmu:72014	ko:K24808
ENSMUSG00000000214	3.117997773	3.982341407	3.695038832	2.869374139	3.302927325	2.949562635	4.370328706	4.035363878	2.881678058	3.360944476	3.106192946	3.5273228	4.273996241	2.897640378	3.845148818	3.271464703	3.370440297	3.457971555	3.611847031	4.103520204	tyrosine hydroxylase	GO:1901605/GO:0004497/GO:0019438/GO:0098562/GO:0016714/GO:0048869/GO:1901576/GO:0001505/GO:0008150/GO:0098700/GO:0006570/GO:0009072/GO:0048856/GO:0001654/GO:0048592/GO:0017144/GO:0004511/GO:0016705/GO:0043204/GO:1901615/GO:0016597/GO:0048468/GO:0098793/GO:0006725/GO:0042416/GO:0048513/GO:0048048/GO:0098805/GO:0009058/GO:0018958/GO:0120025/GO:0000003/GO:0031410/GO:0043226/GO:0044237/GO:0098588/GO:…	ISO/TAS/IMP/IBA/IEA/IDA/IGI	BP/MF/CC	PF00351/PF12549	Th	P24529	path:mmu05030/path:mmu05031/path:mmu00350/path:mmu05012/path:mmu05034/path:mmu01100/path:mmu04728/path:mmu00790/path:mmu04917	mmu:21823	ko:K00501	Cocaine addiction - Mus musculus (house mouse)/Amphetamine addiction - Mus musculus (house mouse)/Tyrosine metabolism - Mus musculus (house mouse)/Parkinson disease - Mus musculus (house mouse)/Alcoholism - Mus musculus (house mouse)/Metabolic pathways - Mus musculus (house mouse)/Dopaminergic synapse - Mus musculus (house mouse)/Folate biosynthesis - Mus musculus (house mouse)/Prolactin signalin…
ENSMUSG00000000223	3.747619061	3.750657167	3.928353546	3.657814884	3.172746137	3.470048495	3.381712234	3.582920904	3.609382022	3.503546048	3.700198045	3.784624872	3.244418256	3.387910864	3.369623163	3.421818436	3.419919647	4.054912936	3.291103102	3.804413485	dystrophin related protein 2	GO:0071944/GO:0007275/GO:0005886/GO:0071840/GO:0046872/GO:0008150/GO:0007417/GO:0050808/GO:0045211/GO:0016020/GO:0098794/GO:0014069/GO:0032502/GO:0030054/GO:0007399/GO:0005488/GO:0048856/GO:0045202/GO:0043226/GO:0043169/GO:0098590/GO:0030425/GO:0046914/GO:0008270/GO:0005575/GO:0043167/GO:0032501/GO:0016043/GO:0048731/GO:0110165/GO:0009987/GO:0042995/GO:0003674/GO:0120025/GO:0034330/GO:0097060/GO:…	IDA/IEA/ISO/IPI	CC/BP/MF	PF00397/PF00435/PF00569/PF09069/PF09068	Drp2	Q05AA6/B1AV35		mmu:13497
ENSMUSG00000000244	-0.119868522	0.063713358	-0.164490845	0.020378482	0.028968025	-0.1534137	-0.128947727	-0.084724599	-0.054328132	-0.070878382	-0.112457745	0.019306417	-0.067336388	-0.084355234	-0.125179677	-0.116206575	-0.157195286	-0.169929794	-0.058299747	-0.068896684	tetraspanin 32	GO:0005575/GO:0042832/GO:0003674/GO:0016021/GO:0042060/GO:0034109/GO:0016020/GO:0009987/GO:0016043/GO:0050688/GO:0065007/GO:0050789/GO:0009615/GO:0048583/GO:0030885/GO:0050866/GO:0043207/GO:0009986/GO:0009611/GO:0009605/GO:0030886/GO:0032991/GO:0110165/GO:0031224/GO:0031226/GO:0031347/GO:0050794/GO:0050896/GO:0008285/GO:0009607/GO:0006952/GO:0007154/GO:0002694/GO:0008150/GO:0043235/GO:0051707/GO:…	IDA/IGI/ND/IBA/IMP/IEA	CC/BP/MF		Tspan32	Q7TNQ7/G3X9S3/Q9JHH2/Q3U3L6		mmu:27027	ko:K17359
ENSMUSG00000000247	-0.024670197	-0.01138957	0.061629173	-0.000440524	0.062657103	0.008784718	0.241213632	0.284184698	0.079451442	0.245512337	0.023941454	-0.030830958	0.068989179	-0.038306176	0.274638356	0.021469436	-0.017424667	0.06542734	0.177317065	0.071125855	LIM homeobox protein 2	GO:0009058/GO:0014020/GO:0001012/GO:0019219/GO:0060562/GO:0016043/GO:0044271/GO:0003676/GO:0000987/GO:0006351/GO:0016049/GO:0061245/GO:1901363/GO:1990837/GO:1901362/GO:1903508/GO:1903506/GO:0035326/GO:0005634/GO:0009059/GO:0060606/GO:1990138/GO:0009889/GO:0035295/GO:0080090/GO:0051093/GO:0060284/GO:0090304/GO:0003674/GO:0016070/GO:0048856/GO:0048869/GO:0031328/GO:0010721/GO:0045944/GO:0045814/GO:…	IMP/IDA/IGI/IEA/IBA/IPI	BP/MF/CC	PF00412/PF00046	Lhx2	Q9Z0S2/F6Z9H5/Q543C6		mmu:16870	ko:K09373
ENSMUSG00000000253	7.255573419	7.845656654	7.251174027	7.535259156	7.683432237	7.492103343	7.671910666	7.439325001	7.411957257	7.242469846	7.307885798	7.345834204	7.613425058	7.477529177	7.869542948	8.266324982	7.372337967	7.47206732	7.781369056	7.475182711	guanosine monophosphate reductase	GO:0009117/GO:1901564/GO:0044238/GO:0043169/GO:0015950/GO:0034641/GO:0006796/GO:0044281/GO:0009112/GO:1901360/GO:0006807/GO:0008150/GO:0032991/GO:1902560/GO:1902494/GO:0043167/GO:0016657/GO:0016491/GO:0015951/GO:0044237/GO:0055086/GO:0003824/GO:0009150/GO:0003920/GO:0009987/GO:0015949/GO:0006793/GO:0046872/GO:0046483/GO:1901135/GO:0006139/GO:0006163/GO:0005575/GO:0019693/GO:0008152/GO:0071704/GO:…	IEA/IBA	BP/MF/CC	PF00478	Gmpr	Q9DCZ1	path:mmu01232/path:mmu01100/path:mmu00230	mmu:66355	ko:K00364	Nucleotide metabolism - Mus musculus (house mouse)/Metabolic pathways - Mus musculus (house mouse)/Purine metabolism - Mus musculus (house mouse)
ENSMUSG00000000263	7.792993986	6.621021828	7.574297769	7.013774097	7.568311586	7.756626747	7.551135555	7.417345772	7.938161695	7.826035503	7.316905274	7.188456522	7.335329962	6.626732271	7.75303392	7.484449853	6.488705812	6.633118124	7.78342634	7.126530809	glycine receptor alpha 1 subunit	GO:0007338/GO:0005230/GO:0099095/GO:0099060/GO:0022835/GO:0099056/GO:0042391/GO:0008150/GO:0005216/GO:0016020/GO:0060089/GO:0007268/GO:0099529/GO:0022834/GO:0043167/GO:0023057/GO:0007600/GO:0015103/GO:0030054/GO:0015108/GO:0042221/GO:0065003/GO:0007267/GO:0042493/GO:0015267/GO:0005215/GO:0022836/GO:0023052/GO:0044057/GO:0071840/GO:0044065/GO:0005488/GO:0007340/GO:0099699/GO:0098948/GO:0099536/GO:…	IMP/IDA/IBA/ISO/IEA	BP/MF/CC	PF02932/PF02931	Glra1	Q5NCT9/Q64018	path:mmu04080	mmu:14654	ko:K05193	Neuroactive ligand-receptor interaction - Mus musculus (house mouse)
ENSMUSG00000000266	1.642910493	0.987017093	1.052724889	1.00787901	1.17996655	1.187658105	1.107637243	1.206511946	1.270818378	1.13757693	1.249598479	0.958682876	1.14447566	1.463310278	1.03815111	1.049752032	1.183460701	1.134060577	1.069442296	1.227891613	midline 2	GO:0044238/GO:0005575/GO:0005874/GO:0042802/GO:0044409/GO:0048518/GO:0005515/GO:0051171/GO:0099081/GO:0048522/GO:0048519/GO:0015631/GO:0070727/GO:0009058/GO:0099512/GO:2000112/GO:0051092/GO:0099513/GO:0015630/GO:0048525/GO:0044237/GO:0005856/GO:0034613/GO:0035890/GO:0044271/GO:0051091/GO:0005622/GO:0009059/GO:0044403/GO:0019080/GO:0071704/GO:0044248/GO:0034645/GO:0034654/GO:0009056/GO:0008104/GO:…	ISO/IEA	BP/CC/MF	PF13445/PF00643/PF18568/PF00622/PF00041	Mid2	B1AVF4/Q9QUS6		mmu:23947	ko:K10647
ENSMUSG00000000275	3.573664349	3.781244589	3.549792384	3.508023283	3.035177416	3.529418633	3.343088898	3.547289906	3.249508962	3.339081828	3.735872479	3.547313632	3.522235081	3.679365263	3.297327547	3.136937672	3.645921859	3.906715791	3.155585266	3.410324785	tripartite motif-containing 25	GO:0098542/GO:0006955/GO:0030163/GO:0003824/GO:1901360/GO:0090304/GO:0031981/GO:0051092/GO:1901564/GO:0043226/GO:0033554/GO:0003674/GO:0005622/GO:0005634/GO:0051171/GO:0051252/GO:0032774/GO:0050896/GO:0032446/GO:0009967/GO:0005654/GO:0043412/GO:0023056/GO:0010647/GO:0044260/GO:0005737/GO:0044249/GO:0009605/GO:0044248/GO:0080090/GO:0052126/GO:0010646/GO:0006355/GO:0044265/GO:0044257/GO:0046597/GO:…	IDA/ISO/IEA/IEP	BP/MF/CC	PF13765/PF00622/PF13445	Trim25	Q3TU94/Q61510	path:mmu04622/path:mmu05164/path:mmu04064	mmu:217069	ko:K10652	RIG-I-like receptor signaling pathway - Mus musculus (house mouse)/Influenza A - Mus musculus (house mouse)/NF-kappa B signaling pathway - Mus musculus (house mouse)
ENSMUSG00000000276	4.774717527	3.774754815	4.464524249	4.32792235	4.071904491	4.327986626	4.461540452	4.173823402	4.83907603	4.640885273	4.448475693	4.021257787	4.612716119	3.780594025	4.441271276	4.393499039	4.148755156	4.135625515	4.332775421	4.043390437	diacylglycerol kinase epsilon	GO:0051246/GO:0016772/GO:0032555/GO:0006796/GO:0006468/GO:0048522/GO:0010604/GO:0035556/GO:0016740/GO:0032559/GO:0006464/GO:0016020/GO:0016301/GO:0043169/GO:0006629/GO:0050789/GO:0050794/GO:0051174/GO:0033674/GO:0006807/GO:0016021/GO:0010646/GO:0008150/GO:0050790/GO:0008144/GO:0051247/GO:0009987/GO:0032553/GO:0043170/GO:0007267/GO:0003674/GO:0006638/GO:0098916/GO:0044238/GO:0048518/GO:0005829/GO:…	IEA/ISO/IBA/IMP	BP/MF/CC	PF00781/PF00130/PF00609	Dgke	Q9R1C6	path:mmu05231/path:mmu00564/path:mmu04070/path:mmu01100/path:mmu04072/path:mmu00561	mmu:56077	ko:K00901	Choline metabolism in cancer - Mus musculus (house mouse)/Glycerophospholipid metabolism - Mus musculus (house mouse)/Phosphatidylinositol signaling system - Mus musculus (house mouse)/Metabolic pathways - Mus musculus (house mouse)/Phospholipase D signaling pathway - Mus musculus (house mouse)/Glycerolipid metabolism - Mus musculus (house mouse)
ENSMUSG00000000278	5.470931715	6.140092697	6.136750437	6.568111256	5.735600483	5.615038355	5.462408415	5.890627698	5.766973521	5.699273146	6.423534364	6.354609013	5.47879241	6.485489339	5.354344118	5.524220915	6.435626349	6.448704137	5.422930883	6.142566835	serine carboxypeptidase 1	GO:0090066/GO:0005622/GO:0005737/GO:0070011/GO:0008236/GO:0070008/GO:0006508/GO:0008217/GO:0008152/GO:0005829/GO:0044267/GO:0140096/GO:0006807/GO:0008238/GO:0110165/GO:0016825/GO:0003013/GO:0045776/GO:0009056/GO:0051603/GO:0008233/GO:1901564/GO:0019538/GO:0003008/GO:0065008/GO:0008015/GO:0009987/GO:1901575/GO:0097755/GO:0071704/GO:0044257/GO:0005575/GO:1901565/GO:0017171/GO:0044238/GO:0003824/GO:…	IGI/ISO/IBA/IDA/IEA	BP/CC/MF	PF00450	Scpep1	Q920A5		mmu:74617	ko:K09646
ENSMUSG00000000282	5.920966554	5.582063562	5.719343672	5.544537771	5.455262073	5.718791628	5.636718747	6.03935556	5.618335711	5.789655415	5.807870493	5.553553173	5.586599381	5.925898224	5.265638965	5.31962264	5.453809172	5.587886886	5.833634996	5.698929552	max binding protein	GO:0090304/GO:0097159/GO:1903506/GO:0010558/GO:0080090/GO:0006355/GO:0006725/GO:0012501/GO:0010605/GO:0043067/GO:2000112/GO:0010941/GO:0006357/GO:0044212/GO:0010629/GO:2001141/GO:0006139/GO:0071704/GO:0006351/GO:1990837/GO:2000113/GO:0010646/GO:0009059/GO:0031327/GO:0043170/GO:0005488/GO:0016070/GO:0010648/GO:1903507/GO:0019219/GO:0043226/GO:0031323/GO:0043066/GO:0018130/GO:0005575/GO:0070013/GO:…	ISO/IMP/IDA/IPI/IC/IEA	BP/MF/CC	PF00010	Mnt	O08789		mmu:17428	ko:K09115
ENSMUSG00000000290	4.540254853	6.13167689	6.320621713	6.963477087	4.415795625	4.582249041	4.248715804	5.704837203	4.450288774	4.346215128	6.50622179	5.858857052	4.902304783	6.912811596	4.83518348	4.935945039	6.520982327	6.700779611	4.026870084	6.503578877	integrin beta 2	GO:0031072/GO:0051047/GO:0060341/GO:0031224/GO:0045055/GO:0005488/GO:0055094/GO:0045121/GO:0051179/GO:0043300/GO:0002446/GO:0098609/GO:0044877/GO:0009719/GO:0006955/GO:0008152/GO:1901698/GO:0043302/GO:0005178/GO:1901564/GO:0001944/GO:0098636/GO:0051716/GO:0060627/GO:1901576/GO:0060089/GO:0008283/GO:0018130/GO:1902563/GO:0006996/GO:1903428/GO:0050789/GO:0004888/GO:0005575/GO:0018108/GO:0009605/GO:…	ISO/IBA/IDA/IMP/IEA/IPI/IGI	MF/BP/CC	PF00362/PF08725/PF17205/PF07965	Itgb2	P11835/Q542I8	path:mmu05166/path:mmu04650/path:mmu05144/path:mmu05146/path:mmu04145/path:mmu05134/path:mmu04670/path:mmu04514/path:mmu05140/path:mmu05416/path:mmu05133/path:mmu05323/path:mmu04390/path:mmu05152/path:mmu04015/path:mmu04610/path:mmu04613/path:mmu05150/path:mmu04810	mmu:16414	ko:K06464	Human T-cell leukemia virus 1 infection - Mus musculus (house mouse)/Natural killer cell mediated cytotoxicity - Mus musculus (house mouse)/Malaria - Mus musculus (house mouse)/Amoebiasis - Mus musculus (house mouse)/Phagosome - Mus musculus (house mouse)/Legionellosis - Mus musculus (house mouse)/Leukocyte transendothelial migration - Mus musculus (house mouse)/Cell adhesion molecules - Mus musc…
ENSMUSG00000000295	4.554717766	4.752712462	4.926311	4.667952528	4.008766729	4.419218183	5.160594342	4.0666119	4.731623274	4.964122543	4.951038548	4.859219753	4.197147617	4.813053475	4.97772065	4.396659543	4.535160073	4.75173385	5.010824807	4.360759611	HD domain containing 2	GO:0003824/GO:0016788/GO:0016787/GO:0003674/GO:0043229/GO:0016791/GO:0005737/GO:0005575/GO:0042578/GO:0043227/GO:0043231/GO:0005622/GO:0002953/GO:0110165/GO:0043226/GO:0005739	IBA/HDA	MF/CC	PF13023	Hddc2	Q3SXD3	path:mmu01232/path:mmu00230/path:mmu01100/path:mmu00240	mmu:69692	ko:K07023	Nucleotide metabolism - Mus musculus (house mouse)/Purine metabolism - Mus musculus (house mouse)/Metabolic pathways - Mus musculus (house mouse)/Pyrimidine metabolism - Mus musculus (house mouse)
ENSMUSG00000000296	5.807380965	5.65731652	5.273433261	5.341806934	5.849575534	5.674364756	5.809344586	5.499768501	6.021086967	6.089918691	5.246855715	5.518434125	5.692379574	5.182716036	5.773520019	5.962646305	5.477761768	5.25748761	6.262745205	5.400555183	tumor protein D52-like 1	GO:0097190/GO:0043085/GO:0071900/GO:0048584/GO:1901564/GO:0140014/GO:0071944/GO:0050789/GO:1902531/GO:0031401/GO:0031325/GO:2001233/GO:0043170/GO:1902533/GO:0006793/GO:0001934/GO:1903047/GO:0009987/GO:0009893/GO:0043412/GO:0048583/GO:0033674/GO:0023051/GO:0080090/GO:2001235/GO:0071902/GO:0005575/GO:0080134/GO:0080135/GO:0043408/GO:0032874/GO:0031323/GO:0023014/GO:0031098/GO:0006468/GO:0097708/GO:…	ISO	BP/CC/MF	PF04201	Tpd52l1	O54818		mmu:21987
ENSMUSG00000000301	3.341432263	3.361110585	3.342597834	3.162006313	3.633133075	2.917714723	3.49705676	3.329890345	2.966087315	3.075523654	3.382746861	3.617406233	3.827407125	3.126637718	3.369337043	3.141703899	3.118829357	3.519063885	3.614426802	3.463278419	phosphatidylethanolamine N-methyltransferase	GO:0090407/GO:0072521/GO:0012505/GO:0004608/GO:0019637/GO:0009790/GO:0009987/GO:0006656/GO:0005575/GO:0008757/GO:0080090/GO:0005622/GO:0009893/GO:0031667/GO:0031323/GO:0010604/GO:0031253/GO:0009116/GO:0009058/GO:0043603/GO:0071944/GO:0006643/GO:0031090/GO:0009891/GO:0009889/GO:0048871/GO:0009991/GO:0009605/GO:0009119/GO:0030148/GO:0006650/GO:0031328/GO:0006629/GO:0065008/GO:0048519/GO:0009792/GO:…	IEA/ISO/IDA/IMP/TAS/ISS/HDA/IBA	BP/CC/MF	PF04191	Pemt	Q61907	path:mmu01100/path:mmu00564	mmu:18618	ko:K00551	Metabolic pathways - Mus musculus (house mouse)/Glycerophospholipid metabolism - Mus musculus (house mouse)
ENSMUSG00000000305	4.713863175	3.776280469	4.008518523	4.300196151	4.458612874	4.513343832	4.3814687	4.339320698	4.398595739	4.526655683	4.198360811	3.797182301	4.730075965	3.989691203	4.321950365	4.015245051	4.108616861	4.18701946	4.312418943	4.104016537	cadherin 4	GO:0031224/GO:0060560/GO:0032990/GO:0008092/GO:0071944/GO:0007399/GO:0061387/GO:0046872/GO:0007275/GO:0071840/GO:0110165/GO:0031175/GO:0065008/GO:0007411/GO:0001558/GO:0032991/GO:0000904/GO:0007157/GO:0009987/GO:0048731/GO:0007409/GO:0065007/GO:0000902/GO:0010720/GO:0048856/GO:0032502/GO:0007156/GO:0048812/GO:0048699/GO:0048666/GO:0010769/GO:0009605/GO:0032989/GO:0061564/GO:0048667/GO:0098609/GO:…	IEA/IDA/IBA/ISO	CC/BP/MF	PF08758/PF01049/PF00028	Cdh4	P39038/Q80ZV4	path:mmu04514	mmu:12561	ko:K06797	Cell adhesion molecules - Mus musculus (house mouse)
ENSMUSG00000000308	8.991988126	9.124880541	8.614774059	8.726168571	9.470582437	9.01932801	9.351833651	9.026510701	8.943492673	9.167555537	8.441452977	8.628729145	9.432681032	8.387227009	9.587110775	9.530237813	8.258751208	8.622170507	9.325205058	8.487532725	creatine kinase mitochondrial 1 ubiquitous	GO:0044237/GO:0044092/GO:0019866/GO:0016772/GO:0005575/GO:0006915/GO:0008150/GO:0008144/GO:0017076/GO:0044232/GO:0003674/GO:0006796/GO:0008152/GO:0031090/GO:0005515/GO:0005488/GO:0016775/GO:0044289/GO:0000166/GO:0044297/GO:0043231/GO:0005524/GO:0016740/GO:0005622/GO:0043229/GO:0043227/GO:0046314/GO:0019637/GO:0046983/GO:0036477/GO:0009987/GO:0048519/GO:0048523/GO:0006807/GO:0004111/GO:0031966/GO:…	IEA/IDA/ISO/IBA/HDA/IGI/IPI	BP/CC/MF	PF02807/PF00217	Ckmt1	P30275/Q545N7	path:mmu01100/path:mmu00330	mmu:12716	ko:K00933	Metabolic pathways - Mus musculus (house mouse)/Arginine and proline metabolism - Mus musculus (house mouse)
ENSMUSG00000000317	0.024990186	0.166779591	0.339630606	0.074183843	0.140875154	0.073332835	0.016470741	0.05498539	0.056073682	0.110764974	0.205191086	0.109952163	0.01980586	0.008961058	0.625178107	0.071796957	0.030686836	0.194001424	0.303564464	0.201630269	B cell CLL/lymphoma 6 member B	GO:0071704/GO:0097159/GO:0003674/GO:0090304/GO:0016070/GO:0019219/GO:0043231/GO:0003676/GO:0097659/GO:0034654/GO:0010556/GO:0043169/GO:0010468/GO:0110165/GO:1901360/GO:0051253/GO:0008152/GO:0080090/GO:0001012/GO:0043167/GO:0034645/GO:0140110/GO:0043565/GO:0010558/GO:0000981/GO:0006366/GO:0034641/GO:0032774/GO:0008150/GO:0000122/GO:1901362/GO:0010605/GO:0009058/GO:0031326/GO:0009059/GO:0000976/GO:…	IDA/IEA/IPI/IBA	BP/MF/CC	PF00096/PF00651	Bcl6b	Q5BKP3/O88282		mmu:12029	ko:K22648
ENSMUSG00000000325	5.706887261	5.880758289	5.887174128	5.955384826	5.526047438	5.874604798	5.346437684	6.158320108	5.438228869	5.559914814	5.553678709	5.289224856	5.594412043	6.118412297	5.361460236	5.877822986	5.649108523	6.00569114	5.902633845	5.99082094	armadillo repeat gene deleted in velocardiofacial syndrome	GO:0005737/GO:0005515/GO:0007155/GO:0005622/GO:0005886/GO:0007275/GO:0016020/GO:0008150/GO:0005488/GO:0098609/GO:0005634/GO:0009987/GO:0016043/GO:0022610/GO:0032501/GO:0005575/GO:0043231/GO:0034329/GO:0043229/GO:0032502/GO:0030054/GO:0007043/GO:0005911/GO:0098742/GO:0048856/GO:0034330/GO:0022607/GO:0043226/GO:0071840/GO:0043227/GO:0045296/GO:0045216/GO:0003674/GO:0016339/GO:0110165/GO:0050839/GO:…	IDA/IBA/IEA/IPI/TAS	CC/MF/BP	PF00514	Arvcf	P98203		mmu:11877
ENSMUSG00000000326	6.846860675	6.628129512	7.261106245	7.263059819	6.938824497	6.811128294	6.788996191	7.010549571	6.960046148	6.663279035	7.024743154	6.802178318	6.457055349	7.379687521	6.980996443	7.030119781	7.144091012	6.909418856	6.634873282	7.054357012	catechol-O-methyltransferase	GO:0008150/GO:1901360/GO:0051234/GO:0019336/GO:0042127/GO:0019614/GO:0120025/GO:0051172/GO:0051239/GO:0110165/GO:0005737/GO:0019439/GO:0007613/GO:0051704/GO:0008152/GO:0005739/GO:0051173/GO:0051716/GO:0042053/GO:0005886/GO:0051171/GO:0035812/GO:0034641/GO:0042180/GO:0035813/GO:0055065/GO:0042069/GO:0050666/GO:0051176/GO:1901575/GO:0051241/GO:0007614/GO:0050896/GO:0043231/GO:0042133/GO:0007610/GO:…	IEA/IBA/ISO/IDA/HDA/IMP	BP/CC/MF	PF01596	Comt	O88587	path:mmu01100/path:mmu00350/path:mmu04728/path:mmu00140	mmu:12846	ko:K00545	Metabolic pathways - Mus musculus (house mouse)/Tyrosine metabolism - Mus musculus (house mouse)/Dopaminergic synapse - Mus musculus (house mouse)/Steroid hormone biosynthesis - Mus musculus (house mouse)
ENSMUSG00000000339	6.960685619	6.953903106	6.888521804	6.75393991	7.118923983	6.8563486	7.198039677	6.929722252	7.211306211	7.197558959	6.584512194	6.561370685	7.39637756	6.749043297	7.35584712	7.205808168	6.936033784	6.73849607	7.182464199	6.739956993	RNA 3'-terminal phosphate cyclase	GO:0043233/GO:0043231/GO:0016874/GO:1901360/GO:0097159/GO:0043229/GO:0031974/GO:1901265/GO:0030554/GO:0071704/GO:0110165/GO:0140098/GO:1901363/GO:0044238/GO:0031981/GO:0044237/GO:0043227/GO:0016070/GO:0016886/GO:0046483/GO:0097367/GO:0005622/GO:0003963/GO:0008152/GO:0032559/GO:0005634/GO:0017076/GO:0043168/GO:0070013/GO:0005488/GO:0003674/GO:0000166/GO:0032555/GO:0032553/GO:0043167/GO:0005575/GO:…	ISO/IBA/IEA	CC/MF/BP	PF01137/PF05189	Rtca	Q9D7H3		mmu:66368	ko:K01974
ENSMUSG00000000340	2.665041318	2.438027959	3.019569278	2.583470499	2.419308774	2.491810565	2.485107025	2.276381977	2.899833972	2.543598804	3.068882932	2.608299798	2.341931057	2.665800643	2.37644355	2.523937895	2.71348008	2.597121922	2.373101127	2.683792787	dihydrolipoamide branched chain transacylase E2	GO:0043754/GO:0009295/GO:0043233/GO:0005575/GO:0043231/GO:0005737/GO:0003674/GO:0005759/GO:0043168/GO:0005622/GO:0042645/GO:0003824/GO:0016407/GO:0110165/GO:0043229/GO:0043232/GO:0005488/GO:0044389/GO:0005739/GO:0043227/GO:0016746/GO:0008289/GO:1901681/GO:0005515/GO:0070013/GO:0019899/GO:0031406/GO:0043226/GO:0043177/GO:0005504/GO:0036094/GO:0043228/GO:0016747/GO:0097159/GO:0031405/GO:1901363/GO:…	IEA/ISO/HDA/IBA	MF/CC	PF02817/PF00198/PF00364	Dbt	P53395	path:mmu00280/path:mmu00640/path:mmu01100	mmu:13171	ko:K09699	Valine leucine and isoleucine degradation - Mus musculus (house mouse)/Propanoate metabolism - Mus musculus (house mouse)/Metabolic pathways - Mus musculus (house mouse)
ENSMUSG00000000346	7.138763185	7.612678656	7.803075966	7.833215825	7.027121767	7.549503289	7.340413116	7.343250972	7.583110457	7.47142329	7.956228207	7.619815048	7.303898991	8.069231838	7.381997409	7.153442076	7.885679997	7.899317554	6.729851527	7.788514096	DAZ associated protein 2	GO:0005515/GO:0004672/GO:0031399/GO:0005488/GO:0070013/GO:0051173/GO:0065009/GO:0003674/GO:0051247/GO:0043229/GO:0043231/GO:0031401/GO:0004674/GO:0001934/GO:0019901/GO:0030971/GO:0043549/GO:0001932/GO:0044260/GO:0031323/GO:0019899/GO:0043227/GO:0071902/GO:0019222/GO:0019220/GO:0065007/GO:0060255/GO:0030295/GO:0016772/GO:0016310/GO:0051246/GO:0051338/GO:0051347/GO:0003824/GO:0016604/GO:0071900/GO:…	IPI/IDA/ISO/IEA/IC	MF/BP/CC	PF11029	Dazap2	Q9DCP9		mmu:23994
ENSMUSG00000000355	1.933663311	1.684309932	1.733920037	2.154494668	1.793096908	2.039647844	1.894345526	1.675099053	1.878099204	2.096807315	1.870380432	1.881769639	1.887986747	1.839661521	1.906245118	1.935661226	1.95831533	1.61767848	1.832167271	1.808766302	malignant T cell amplified sequence 1	GO:0043603/GO:0044249/GO:1901566/GO:0043232/GO:0043229/GO:0034641/GO:0005622/GO:0022411/GO:0022607/GO:0044403/GO:0044391/GO:0044238/GO:0034645/GO:0043228/GO:0033554/GO:0005488/GO:0008150/GO:0003743/GO:0044085/GO:1901363/GO:0019538/GO:0097159/GO:0043604/GO:0006974/GO:0044419/GO:0090079/GO:1901576/GO:0003723/GO:0044237/GO:0032790/GO:0006413/GO:0110165/GO:1901564/GO:0034622/GO:0071840/GO:0009059/GO:…	IEA/IBA/ISO	BP/CC/MF	PF01472/PF17832	Mcts1	Q9DB27		mmu:68995	ko:K07575
ENSMUSG00000000374	6.69339518	6.665172133	6.79568498	6.773703872	6.518427439	6.677208933	6.647715197	6.822383264	6.665570253	6.730975797	6.767357775	6.910465417	6.574614844	6.684932862	6.307245607	6.794421823	6.816437404	6.770135791	6.894001079	6.894185206	trafficking protein particle complex 10	GO:0016020/GO:0012505/GO:0071944/GO:0016192/GO:0071840/GO:0110165/GO:0043227/GO:0043229/GO:0009987/GO:0065003/GO:0016482/GO:0051259/GO:0042147/GO:0099023/GO:0005768/GO:0051234/GO:0032991/GO:0006891/GO:0097708/GO:0043231/GO:0005773/GO:0005575/GO:0051641/GO:0051179/GO:0043933/GO:0008150/GO:0046907/GO:0005886/GO:0005794/GO:0005622/GO:0003674/GO:0044085/GO:0051649/GO:0048193/GO:0005737/GO:0016197/GO:…	IBA/IEA/ISO/ND	CC/BP/MF	PF12584	Trappc10	F8VQF9
ENSMUSG00000000378	6.88387418	7.194030586	6.912988609	6.999165287	7.280572632	6.858713037	7.161565273	7.208333871	6.812267942	6.934544209	6.845743132	6.898332849	7.179026923	7.004331808	7.290467567	7.150800932	7.046680951	7.129163774	7.123339073	6.996661304	cerebral cavernous malformation 2	GO:0005575/GO:0007275/GO:0035239/GO:0048729/GO:0002009/GO:0072359/GO:0001885/GO:0007423/GO:0001944/GO:0001570/GO:0060841/GO:0008150/GO:0048513/GO:0005739/GO:0007507/GO:0071840/GO:0048731/GO:0001701/GO:0072358/GO:0005515/GO:0005737/GO:0001568/GO:0110165/GO:0061154/GO:0030154/GO:0035264/GO:0030855/GO:0032501/GO:0009888/GO:0005488/GO:0009790/GO:0032502/GO:0009792/GO:0040007/GO:0032991/GO:0048514/GO:…	IDA/ISO/IGI/IMP/IPI	CC/BP/MF	PF16545	Ccm2	Q8K2Y9/F7AVU1		mmu:216527
ENSMUSG00000000384	5.403451034	5.428713475	5.080629439	5.459371111	5.635594828	5.234330015	5.343029613	5.062983983	5.363612943	5.68341192	5.220175727	5.417868452	5.58404069	4.625175748	5.252015612	5.831203029	5.060690155	5.522943591	5.761044632	5.208643137	transforming growth factor beta regulated gene 4	GO:0010467/GO:0010468/GO:0065008/GO:0061013/GO:0019219/GO:0031323/GO:0044238/GO:0019222/GO:0019439/GO:0055114/GO:0060255/GO:0005575/GO:0043229/GO:0065007/GO:0009894/GO:0006396/GO:0031329/GO:0006397/GO:0044260/GO:0044237/GO:0006139/GO:0043226/GO:0070013/GO:0140053/GO:0006091/GO:0009987/GO:0044265/GO:0009057/GO:0005739/GO:0009892/GO:0006402/GO:0000959/GO:0004672/GO:0110165/GO:0003824/GO:0009056/GO:…	ISO/ISS/HDA/IEA	BP/CC/MF	PF06743/PF08368/PF08373	Tbrg4	Q91YM4		mmu:21379
ENSMUSG00000000399	7.604711774	7.562216052	7.20381067	7.711027963	7.794576232	7.582343301	7.68713924	7.367665537	7.392203342	7.791005853	7.2044261	7.640466432	7.543985698	7.399337899	7.529816743	7.493343902	7.397440523	7.790654117	7.504030704	7.457270421	NADH:ubiquinone oxidoreductase subunit A9	GO:0003674/GO:0005575/GO:0003824/GO:0031974/GO:0045271/GO:0098800/GO:0043231/GO:0031975/GO:0031966/GO:0044283/GO:0043227/GO:0022607/GO:0031967/GO:0007005/GO:0005739/GO:0005622/GO:0048511/GO:0007623/GO:0098798/GO:0005740/GO:0071840/GO:0044877/GO:1902494/GO:0005747/GO:0110165/GO:0032991/GO:0043229/GO:0065003/GO:0006743/GO:0043226/GO:0098803/GO:0031090/GO:0005737/GO:0070469/GO:0070013/GO:0032981/GO:…	IBA/ISO/IDA/IEA/HDA	MF/CC/BP	PF05368	Ndufa9	Q9DC69	path:mmu05010/path:mmu05022/path:mmu05012/path:mmu04714/path:mmu00190/path:mmu04723/path:mmu05016/path:mmu05014/path:mmu01100/path:mmu05208/path:mmu04932/path:mmu05020/path:mmu05415	mmu:66108	ko:K03953	Alzheimer disease - Mus musculus (house mouse)/Pathways of neurodegeneration - multiple diseases - Mus musculus (house mouse)/Parkinson disease - Mus musculus (house mouse)/Thermogenesis - Mus musculus (house mouse)/Oxidative phosphorylation - Mus musculus (house mouse)/Retrograde endocannabinoid signaling - Mus musculus (house mouse)/Huntington disease - Mus musculus (house mouse)/Amyotrophic la…
ENSMUSG00000000402	1.615737533	1.507212791	1.571030491	1.552440053	1.765554436	1.740919315	1.750075189	1.753465162	1.862084801	1.913741575	1.531195562	1.5569918	1.864111056	1.795470818	1.624274491	1.969230105	1.422914964	1.626952653	1.598166651	1.481589121	EGF-like-domain multiple 6	GO:0046872/GO:0048518/GO:0007155/GO:0010810/GO:0005509/GO:0022610/GO:0048522/GO:0005575/GO:0003674/GO:0043062/GO:0005488/GO:0043169/GO:0045785/GO:0009987/GO:0005576/GO:0005604/GO:0010811/GO:0110165/GO:0032501/GO:0031589/GO:0030155/GO:0016020/GO:0016043/GO:0007275/GO:0030154/GO:0031012/GO:0030198/GO:0050794/GO:0008150/GO:0043167/GO:0048856/GO:0048869/GO:0062023/GO:0032502/GO:0050789/GO:0071840/GO:…	IEA/IDA	MF/BP/CC	PF07645/PF00629	Egfl6	Q9JJZ5		mmu:54156	ko:K25527
ENSMUSG00000000409	0.809886817	1.219005815	1.11027212	0.993952774	0.837739801	0.991338225	0.796741912	1.351839093	0.77075494	1.166087836	1.125384357	1.010824276	1.096380239	0.905013634	1.364526482	1.043741043	0.855045642	1.006256593	0.937628747	1.25239339	lymphocyte protein tyrosine kinase	GO:0018193/GO:0019222/GO:0050789/GO:0043065/GO:0043067/GO:0006796/GO:0018108/GO:0098978/GO:0098794/GO:0048513/GO:0010646/GO:0019538/GO:0098805/GO:0042981/GO:0032501/GO:0098857/GO:0005575/GO:0004722/GO:0048583/GO:0070588/GO:0140096/GO:0010604/GO:0005102/GO:0004713/GO:0006939/GO:0065007/GO:0016020/GO:0098655/GO:0060401/GO:0060341/GO:0045785/GO:0006919/GO:0010628/GO:0034220/GO:0098660/GO:0045321/GO:…	IBA/ISO/IEA/IGI/IDA/IMP/IPI	BP/CC/MF	PF00017/PF00018/PF07714	Lck	P06240/E9Q696	path:mmu05340/path:mmu05166/path:mmu04659/path:mmu04380/path:mmu04660/path:mmu04064/path:mmu05235/path:mmu04650/path:mmu05135/path:mmu04658	mmu:16818	ko:K05856	Primary immunodeficiency - Mus musculus (house mouse)/Human T-cell leukemia virus 1 infection - Mus musculus (house mouse)/Th17 cell differentiation - Mus musculus (house mouse)/Osteoclast differentiation - Mus musculus (house mouse)/T cell receptor signaling pathway - Mus musculus (house mouse)/NF-kappa B signaling pathway - Mus musculus (house mouse)/PD-L1 expression and PD-1 checkpoint pathway…
ENSMUSG00000000416	3.829648006	3.5311342	3.944716056	3.618416944	3.537900852	3.831901502	3.761328418	3.729427614	3.901596994	3.933883782	3.601535771	3.371322742	3.563843722	3.552662124	4.009831055	3.430203889	3.722543311	3.358187966	3.669186826	3.327503846	cortactin binding protein 2	GO:0016020/GO:0007010/GO:0043232/GO:0005622/GO:0098978/GO:0016043/GO:0005737/GO:0017124/GO:0099571/GO:0098793/GO:0071840/GO:0065008/GO:0005575/GO:0043231/GO:0070382/GO:0099563/GO:0099010/GO:0071944/GO:0050808/GO:0098871/GO:0051128/GO:0043227/GO:0005519/GO:0008021/GO:0065007/GO:0030054/GO:0050807/GO:0015629/GO:0043228/GO:0110165/GO:0097708/GO:0030133/GO:0006996/GO:0098794/GO:0009987/GO:0030029/GO:…	ISO/IDA/IEA/IMP	CC/BP/MF	PF09727/PF00023/PF12796	Cttnbp2	B9EJA2		mmu:30785
ENSMUSG00000000420	4.9472238	4.757230858	5.296470077	5.253877168	4.430446029	5.192325001	4.916409814	4.911819419	4.874297954	5.202149103	5.306381069	5.07808281	4.629533361	5.002233773	4.855374996	4.472583852	5.106932493	5.405483225	4.509766032	5.027581805	polypeptide N-acetylgalactosaminyltransferase 1	GO:0009101/GO:0044249/GO:0009100/GO:0043229/GO:0006464/GO:0044260/GO:0009987/GO:1901576/GO:0016757/GO:0016758/GO:0043231/GO:1901566/GO:0016740/GO:0043412/GO:0005622/GO:0005488/GO:0005575/GO:0043413/GO:0016020/GO:0005737/GO:0044267/GO:1901564/GO:1901137/GO:0005886/GO:0043227/GO:0004653/GO:0009059/GO:0012505/GO:0005794/GO:0003824/GO:0005773/GO:0006486/GO:0044238/GO:0018210/GO:0019538/GO:0009058/GO:…	ISO/IDA/IBA/IEA	BP/CC/MF	PF02709/PF00652/PF00535	Galnt1	Q3UFE4/O08912	path:mmu00512/path:mmu01100/path:mmu00514	mmu:14423	ko:K00710	Mucin type O-glycan biosynthesis - Mus musculus (house mouse)/Metabolic pathways - Mus musculus (house mouse)/Other types of O-glycan biosynthesis - Mus musculus (house mouse)
ENSMUSG00000000439	2.463651903	2.062641928	2.244102218	2.517293785	2.444194186	2.37327029	2.481348935	1.968048171	2.119128273	2.234532021	2.093023724	2.294516058	2.709306175	2.424888792	2.06995032	2.428010409	2.141111881	2.074582792	2.479856167	2.304732951	makorin ring finger protein 2	GO:0005488/GO:0043169/GO:0046872/GO:0003674/GO:0008150/GO:0043167/GO:0016740/GO:0003824	IEA/ND	MF/BP	PF00097/PF00642/PF18044	Mkrn2	Q9ERV1		mmu:67027	ko:K15687
ENSMUSG00000000440	1.48362059	1.47323968	1.52027087	1.624606026	1.341090774	1.33593434	1.386688638	1.616798221	1.684645322	1.729802308	1.440873961	1.402513998	1.480484354	1.690492105	1.324869311	1.337308851	1.359998026	1.397830852	1.252998767	1.329054665	peroxisome proliferator activated receptor gamma	GO:0030072/GO:0051393/GO:0008150/GO:0048471/GO:0043227/GO:0032502/GO:1901699/GO:0140297/GO:0033613/GO:0060965/GO:0030154/GO:0051348/GO:0140110/GO:0023061/GO:0005575/GO:0048519/GO:1902680/GO:0033500/GO:0005488/GO:1901698/GO:0000122/GO:0048511/GO:0005622/GO:1902679/GO:0033993/GO:0048513/GO:0042277/GO:0018130/GO:0060964/GO:0090304/GO:0060850/GO:0048518/GO:0002791/GO:0048468/GO:0002792/GO:0050789/GO:…	IMP/ISO/TAS/IBA/IPI/IGI/IEA/IDA/IEP	BP/MF/CC	PF00104/PF12577/PF00105	Pparg	M1VPI1/P37238/Q6GU14	path:mmu05417/path:mmu05016/path:mmu05200/path:mmu05216/path:mmu04152/path:mmu04380/path:mmu04932/path:mmu03320/path:mmu04714/path:mmu04211/path:mmu05202	mmu:19016	ko:K08530	Lipid and atherosclerosis - Mus musculus (house mouse)/Huntington disease - Mus musculus (house mouse)/Pathways in cancer - Mus musculus (house mouse)/Thyroid cancer - Mus musculus (house mouse)/AMPK signaling pathway - Mus musculus (house mouse)/Osteoclast differentiation - Mus musculus (house mouse)/Non-alcoholic fatty liver disease - Mus musculus (house mouse)/PPAR signaling pathway - Mus musc…
ENSMUSG00000000441	5.83156343	5.73704839	5.873392025	5.984615303	5.860784804	6.000572476	5.794413753	5.998828376	5.868228131	5.776054035	5.899018092	5.926411908	5.96519908	5.72665074	5.768996694	6.03700921	5.821500683	5.767236244	5.99715944	5.732294109	v-raf-leukemia viral oncogene 1	GO:0044260/GO:0030878/GO:0044249/GO:0009058/GO:0002790/GO:0031399/GO:0071333/GO:0007165/GO:0140096/GO:0002520/GO:0008625/GO:0045103/GO:0031328/GO:0071326/GO:0003824/GO:0003674/GO:0043229/GO:0071902/GO:0043226/GO:0048519/GO:0051716/GO:0031333/GO:0071331/GO:0009891/GO:0001934/GO:0031267/GO:0031325/GO:0045104/GO:0044238/GO:0010646/GO:0031143/GO:0071704/GO:0023051/GO:0030073/GO:0071705/GO:0005773/GO:…	IBA/IGI/IMP/TAS/ISO/IEA/IPI/IDA	BP/MF/CC	PF07714/PF02196/PF00130	Raf1	Q99N57	path:mmu05022/path:mmu04270/path:mmu04625/path:mmu05205/path:mmu05206/path:mmu05170/path:mmu05160/path:mmu05219/path:mmu04072/path:mmu04151/path:mmu05163/path:mmu04650/path:mmu04014/path:mmu05225/path:mmu05230/path:mmu04914/path:mmu04720/path:mmu04664/path:mmu05167/path:mmu04929/path:mmu05220/path:mmu05132/path:mmu05200/path:mmu04371/path:mmu04921/path:mmu04919/path:mmu04935/path:mmu05034/path:mm…	mmu:110157	ko:K04366	Pathways of neurodegeneration - multiple diseases - Mus musculus (house mouse)/Vascular smooth muscle contraction - Mus musculus (house mouse)/C-type lectin receptor signaling pathway - Mus musculus (house mouse)/Proteoglycans in cancer - Mus musculus (house mouse)/MicroRNAs in cancer - Mus musculus (house mouse)/Human immunodeficiency virus 1 infection - Mus musculus (house mouse)/Hepatitis C - …
ENSMUSG00000000486	2.541436784	2.854030775	2.461992038	2.426931041	2.923320952	2.717090869	2.653250624	2.777833918	3.00331002	2.557706201	2.650278727	2.806980069	2.572045863	2.688512229	2.465935724	2.376363962	2.793211274	2.614069762	2.535118842	2.636928107	septin 1/predicted gene 4532	GO:0051641/GO:0051179/GO:0051656/GO:0006887/GO:0005773/GO:0036094/GO:0051704/GO:0006810/GO:0061640/GO:0005622/GO:0005856/GO:0051311/GO:0005819/GO:0035639/GO:0042802/GO:1903530/GO:0051301/GO:0051649/GO:0005886/GO:0005938/GO:0016043/GO:0031105/GO:0012505/GO:0032991/GO:0022414/GO:0032561/GO:0140029/GO:0005737/GO:0110165/GO:0140013/GO:1901265/GO:0090174/GO:0032555/GO:0032553/GO:0032501/GO:0031982/GO:…	IMP/IBA/IEA/IDA/ISO	BP/CC/MF	PF00735	Sept1/Gm4532	P42209/D3Z3V3	path:mmu05100	mmu:54204	ko:K13737	Bacterial invasion of epithelial cells - Mus musculus (house mouse)
ENSMUSG00000000489	4.327396359	4.903416051	4.641723758	4.718982315	4.47037118	4.370023542	4.69673979	4.467344239	4.431306827	4.333405047	4.879964195	4.645852971	4.432503936	4.883045011	3.874229838	4.730688986	4.674258443	4.654131407	4.790067604	4.546673411	platelet derived growth factor B polypeptide	GO:0048870/GO:0001944/GO:0030334/GO:0043405/GO:0090066/GO:0060255/GO:0048514/GO:0070371/GO:0018130/GO:0030258/GO:0048869/GO:0018193/GO:0009967/GO:0043270/GO:0038084/GO:0009653/GO:1902680/GO:0043393/GO:0007507/GO:0065009/GO:1902533/GO:0051674/GO:0001938/GO:0007167/GO:0090068/GO:0018108/GO:0036477/GO:0050789/GO:0038033/GO:1902679/GO:0009987/GO:0065008/GO:0006366/GO:0048583/GO:0043542/GO:0000122/GO:…	IMP/IGI/IBA/TAS/IDA/ISO/IEP/IEA	BP/CC/MF	PF04692/PF00341	Pdgfb	P31240/A0A0R4IZW4	path:mmu05200/path:mmu01521/path:mmu04010/path:mmu04072/path:mmu05418/path:mmu05214/path:mmu05218/path:mmu05215/path:mmu04810/path:mmu04014/path:mmu05206/path:mmu05231/path:mmu05211/path:mmu04151/path:mmu04630/path:mmu04020/path:mmu04540/path:mmu04510/path:mmu04015/path:mmu05167	mmu:18591	ko:K17386	Pathways in cancer - Mus musculus (house mouse)/EGFR tyrosine kinase inhibitor resistance - Mus musculus (house mouse)/MAPK signaling pathway - Mus musculus (house mouse)/Phospholipase D signaling pathway - Mus musculus (house mouse)/Fluid shear stress and atherosclerosis - Mus musculus (house mouse)/Glioma - Mus musculus (house mouse)/Melanoma - Mus musculus (house mouse)/Prostate cancer - Mus m…
ENSMUSG00000000530	5.151404501	5.217859788	5.0325357	5.331761784	5.48590048	5.547592633	4.842911729	5.365448304	4.905357798	5.058235065	5.341642167	5.612494693	4.791320201	5.156135929	5.462598079	5.450174058	5.032901661	5.277798084	5.378473967	5.16466683	activin A receptor type II-like 1	GO:0080090/GO:0008283/GO:0006807/GO:0003674/GO:0072359/GO:0019901/GO:0050789/GO:0045937/GO:0060429/GO:0050793/GO:0005488/GO:0003158/GO:0022603/GO:0051173/GO:0048518/GO:0005025/GO:0046332/GO:0010628/GO:0042221/GO:0061298/GO:0016021/GO:0045935/GO:0097367/GO:0051172/GO:0050794/GO:0019900/GO:0010605/GO:0042995/GO:0042325/GO:0050678/GO:0060389/GO:0065007/GO:0016049/GO:0045944/GO:0019955/GO:0045893/GO:…	IMP/IDA/IPI/ISO/IGI/IBA/IEA/TAS	BP/MF/CC	PF07714/PF08515	Acvrl1	Q61288	path:mmu04060	mmu:11482	ko:K13594	Cytokine-cytokine receptor interaction - Mus musculus (house mouse)
ENSMUSG00000000531	3.473809695	3.226133185	3.11336525	3.603697177	3.703116322	3.557113289	3.305420636	3.809482832	3.428531586	3.149508393	2.989598205	3.385953337	3.167890638	3.257061652	3.466985644	3.526689994	3.581521455	3.199103883	3.461678385	3.653290194	GRP1 (general receptor for phosphoinositides 1)-associated scaffold protein	GO:0098978/GO:0030306/GO:0099152/GO:0031503/GO:0031267/GO:0030054/GO:0016192/GO:0051179/GO:0016020/GO:0016197/GO:0005886/GO:0030165/GO:0005575/GO:0023052/GO:0098984/GO:0005634/GO:0019904/GO:0035418/GO:0043229/GO:0098794/GO:0065007/GO:0050794/GO:0005622/GO:0005488/GO:0098876/GO:0099072/GO:0005641/GO:0098877/GO:0070727/GO:0070201/GO:0051049/GO:1903539/GO:1902473/GO:0005737/GO:0005515/GO:0098685/GO:…	IMP/ISO/IDA/IBA/IPI/IEA	CC/MF/BP	PF00595	Grasp	Q9JJA9		mmu:56149	ko:K24053
ENSMUSG00000000532	6.290858977	5.686225531	5.902100826	5.663940249	5.989850105	6.067008824	6.006478915	6.24502742	6.060720637	6.238819078	6.01213609	5.972027716	6.289626179	5.697603591	5.657319486	6.134715177	5.639686986	6.152007246	6.459761515	5.858903105	activin A receptor type 1B	GO:0046332/GO:0140096/GO:0016301/GO:0043167/GO:0007166/GO:0045944/GO:0043168/GO:0005886/GO:0032502/GO:0019538/GO:0032774/GO:0016772/GO:0065007/GO:0009893/GO:0019838/GO:0016049/GO:0048179/GO:0046872/GO:0016740/GO:0043902/GO:0071363/GO:0022404/GO:0043412/GO:0071704/GO:0046483/GO:0032501/GO:0043009/GO:0010468/GO:0110165/GO:0003674/GO:0016043/GO:0044237/GO:0006464/GO:0043588/GO:0043235/GO:0007167/GO:…	ISO/IDA/IBA/IEA/TAS/IMP/IPI	MF/BP/CC	PF08515/PF00069/PF01064	Acvr1b	Q61271/Q3TZF1	path:mmu04060/path:mmu04350/path:mmu04550	mmu:11479	ko:K13567	Cytokine-cytokine receptor interaction - Mus musculus (house mouse)/TGF-beta signaling pathway - Mus musculus (house mouse)/Signaling pathways regulating pluripotency of stem cells - Mus musculus (house mouse)
ENSMUSG00000000538	8.169680726	8.111914401	7.907057543	8.059249503	8.59057609	8.295902448	8.354027275	8.38076793	8.200811826	8.541098444	7.656240474	8.130891536	8.405918702	7.871245294	8.642459973	8.558269387	7.958984789	7.994210234	8.701917711	8.047229596	target of myb1-like 2 (chicken)	GO:0071705/GO:0071840/GO:0070727/GO:0051128/GO:0140014/GO:0050794/GO:0051783/GO:0071702/GO:0008150/GO:0042886/GO:0007088/GO:0051234/GO:0051716/GO:0010639/GO:0050896/GO:0051726/GO:0065007/GO:0033036/GO:0015031/GO:0051649/GO:0009987/GO:0010564/GO:0051129/GO:0007346/GO:0033043/GO:0003674/GO:0007165/GO:0023052/GO:0007154/GO:0010948/GO:0051784/GO:0030276/GO:0034613/GO:0006996/GO:0048523/GO:0005515/GO:…	IEA/ISO	BP/MF/CC	PF00790/PF03127	Tom1l2	Q5SRX1		mmu:216810
ENSMUSG00000000552	7.773092835	7.659796337	7.333003896	7.656445626	8.222500783	7.633246902	7.953780921	7.74628581	7.688406691	7.903370578	7.06628419	7.519929374	8.015507608	7.345673454	8.150772312	8.27709943	7.26824418	7.550675644	8.189839867	7.423294568	zinc finger protein 385A	GO:0007599/GO:0043170/GO:0044271/GO:0070727/GO:0007611/GO:0051716/GO:0060255/GO:0044267/GO:0065008/GO:0051246/GO:0044260/GO:0007275/GO:0007610/GO:0010256/GO:0003723/GO:0071704/GO:0009987/GO:0051641/GO:0065007/GO:0051171/GO:0000790/GO:0043169/GO:0003676/GO:0003730/GO:0043069/GO:0043067/GO:0023051/GO:0042981/GO:0019222/GO:0050896/GO:0032268/GO:0031323/GO:0061515/GO:0006996/GO:0043066/GO:0043005/GO:…	IMP/IEA/IBA/NAS/ISO/IDA	BP/MF/CC		Zfp385a	Q8VD12		mmu:29813
ENSMUSG00000000555	2.119266063	2.931908088	3.280375402	3.214649118	2.537984379	2.638842575	2.216469005	2.850131614	2.177675246	2.275875463	2.993009007	2.91561682	2.195946837	3.47826568	2.620392053	2.418657264	3.320848794	3.010492224	2.315031028	3.326650272	integrin alpha 5 (fibronectin receptor alpha)	GO:0009893/GO:0033631/GO:0019538/GO:1903672/GO:0033627/GO:0150115/GO:1904018/GO:0009888/GO:1903670/GO:0005488/GO:0009986/GO:1901564/GO:0009897/GO:0006793/GO:0043067/GO:0048729/GO:0048731/GO:0032991/GO:1901342/GO:0009987/GO:0005515/GO:0051247/GO:0043066/GO:0019222/GO:0042995/GO:0045937/GO:0051179/GO:0005102/GO:0019220/GO:0005178/GO:0009790/GO:0042981/GO:0042327/GO:0043167/GO:0040017/GO:0006796/GO:…	ISO/IMP/IDA/IEA/IGI/IPI	BP/MF/CC	PF08441/PF01839	Itga5	P11688/Q80YP5	path:mmu05135/path:mmu04151/path:mmu05168/path:mmu04512/path:mmu05410/path:mmu05100/path:mmu05165/path:mmu05206/path:mmu05133/path:mmu05205/path:mmu05412/path:mmu04145/path:mmu04640/path:mmu05414/path:mmu04810/path:mmu04510	mmu:16402	ko:K06484	Yersinia infection - Mus musculus (house mouse)/PI3K-Akt signaling pathway - Mus musculus (house mouse)/Herpes simplex virus 1 infection - Mus musculus (house mouse)/ECM-receptor interaction - Mus musculus (house mouse)/Hypertrophic cardiomyopathy - Mus musculus (house mouse)/Bacterial invasion of epithelial cells - Mus musculus (house mouse)/Human papillomavirus infection - Mus musculus (house m…
ENSMUSG00000000560	7.033474469	6.689714283	7.161841356	6.582289339	6.937656695	6.975597395	7.349137609	7.268337751	7.444651868	7.119179919	7.173707948	7.149660801	6.72834423	6.804909547	6.857300145	6.673904939	6.879564562	7.104897578	7.035838858	7.191866628	gamma-aminobutyric acid (GABA) A receptor subunit alpha 2	GO:0015103/GO:1990351/GO:0005575/GO:0005488/GO:0042391/GO:0071944/GO:0031224/GO:0042165/GO:0015075/GO:0015698/GO:0015267/GO:0071840/GO:0097708/GO:0022851/GO:0006810/GO:0015108/GO:0120025/GO:0005515/GO:0098660/GO:0097060/GO:1902476/GO:0098563/GO:0043235/GO:0043229/GO:0030054/GO:0098661/GO:0070382/GO:0005887/GO:0030594/GO:0030658/GO:0030133/GO:0043226/GO:0030659/GO:0030672/GO:0016020/GO:1904862/GO:…	IDA/IEA/IBA/ISO/IPI	MF/CC/BP	PF02931/PF02932	Gabra2	P26048/Q544G1	path:mmu04742/path:mmu05032/path:mmu04727/path:mmu04723/path:mmu05033/path:mmu04080	mmu:14395	ko:K05175	Taste transduction - Mus musculus (house mouse)/Morphine addiction - Mus musculus (house mouse)/GABAergic synapse - Mus musculus (house mouse)/Retrograde endocannabinoid signaling - Mus musculus (house mouse)/Nicotine addiction - Mus musculus (house mouse)/Neuroactive ligand-receptor interaction - Mus musculus (house mouse)
ENSMUSG00000000561	3.051116474	2.791751481	2.965658558	2.906873005	2.794705544	3.099876663	3.040173418	2.765422504	3.122144134	2.976900566	2.807939963	2.452648946	2.823425362	2.795399823	2.878438851	3.012948257	3.071935984	2.721356304	2.729339167	2.460797577	WD repeat domain 77	GO:0005654/GO:0097659/GO:0140110/GO:0005622/GO:1902494/GO:0060429/GO:0060767/GO:0060770/GO:0003676/GO:0005886/GO:0110165/GO:0060742/GO:1901360/GO:0097159/GO:0060255/GO:0048523/GO:0050680/GO:1901363/GO:0050673/GO:0006725/GO:0003674/GO:0030850/GO:0043231/GO:0005488/GO:0050678/GO:0060528/GO:0048608/GO:0008285/GO:0005634/GO:1901265/GO:0060768/GO:0031974/GO:0016020/GO:0034654/GO:0034645/GO:0071704/GO:…	ISO/IMP/IGI/IPI	CC/BP/MF	PF00400	Wdr77	Q99J09		mmu:70465	ko:K13221
ENSMUSG00000000562	0.549318155	0.790377462	0.768108561	0.724286562	0.667354018	0.837284418	0.538074517	0.780612824	0.58872169	0.885738858	0.798551583	0.571565818	0.740433698	0.643732725	0.74333902	0.756445009	0.589929574	0.955573543	0.574848588	1.099095548	adenosine A3 receptor/transmembrane and immunoglobulin domain containing 3	GO:0051270/GO:0040017/GO:0008150/GO:0008152/GO:0051252/GO:0051234/GO:0070255/GO:0051240/GO:0002532/GO:0046879/GO:0070257/GO:0002448/GO:0007589/GO:0045921/GO:0007154/GO:0048284/GO:0071702/GO:0008285/GO:0008283/GO:0014068/GO:0046907/GO:0007165/GO:0048519/GO:0043170/GO:0051179/GO:0007267/GO:0016050/GO:0016043/GO:0002441/GO:0051239/GO:0065007/GO:0014066/GO:1902531/GO:0048017/GO:0046903/GO:1902533/GO:…	ISO/IGI/IMP/IDA	BP/CC/MF	PF00001	Adora3/Tmigd3	Q3U4C5/G3X8R9/Q497R5	path:mmu04071/path:mmu04080/path:mmu04022	mmu:11542/mmu:69296	ko:K04268	Sphingolipid signaling pathway - Mus musculus (house mouse)/Neuroactive ligand-receptor interaction - Mus musculus (house mouse)/cGMP-PKG signaling pathway - Mus musculus (house mouse)
ENSMUSG00000000563	9.34032501	9.37347568	9.382731778	9.258937797	9.514859181	9.430798548	9.477297181	9.305945734	9.497796161	9.496566434	9.291870788	9.338180438	9.513125058	9.453613294	9.526317199	9.47008463	9.333405682	9.379636837	9.317029155	9.267420209	ATP synthase peripheral stalk-membrane subunit b	GO:0090407/GO:0031967/GO:0031981/GO:0008150/GO:0031975/GO:0045263/GO:0006793/GO:0032991/GO:0008324/GO:0009260/GO:0006807/GO:0072521/GO:0033177/GO:0031974/GO:0005753/GO:0006139/GO:0046034/GO:0045259/GO:0110165/GO:0006725/GO:0043209/GO:1901362/GO:0070013/GO:0008152/GO:0000276/GO:0046933/GO:0043233/GO:0044237/GO:0006754/GO:1901137/GO:0015077/GO:0015075/GO:0009987/GO:0051179/GO:0046390/GO:0006753/GO:…	IBA/ISO/IEA/HDA	BP/CC/MF	PF05405	Atp5pb	Q5I0W0/Q9CQQ7	path:mmu01100/path:mmu05208/path:mmu05415/path:mmu04714/path:mmu05020/path:mmu05016/path:mmu00190/path:mmu05022/path:mmu05014/path:mmu05010/path:mmu05012	mmu:11950	ko:K02127	Metabolic pathways - Mus musculus (house mouse)/Chemical carcinogenesis - reactive oxygen species - Mus musculus (house mouse)/Diabetic cardiomyopathy - Mus musculus (house mouse)/Thermogenesis - Mus musculus (house mouse)/Prion disease - Mus musculus (house mouse)/Huntington disease - Mus musculus (house mouse)/Oxidative phosphorylation - Mus musculus (house mouse)/Pathways of neurodegeneration …
ENSMUSG00000000567	4.64443412	4.804198588	5.625705274	5.269469674	4.380296024	5.05598477	4.721521734	4.700815966	4.910330111	4.793864468	5.704663734	5.411750006	4.247851089	5.368284389	4.696074387	4.427316665	5.533665536	5.633786243	4.22301762	5.382211039	SRY (sex determining region Y)-box 9	GO:0090304/GO:0048608/GO:0061326/GO:0044267/GO:0043170/GO:0050789/GO:0001067/GO:0061009/GO:0007548/GO:0032332/GO:0008152/GO:0061333/GO:0031325/GO:0030850/GO:0072080/GO:0090189/GO:0010033/GO:0072087/GO:0060425/GO:0045596/GO:0001101/GO:0045597/GO:0032501/GO:0001894/GO:2000112/GO:0010669/GO:0007542/GO:0061008/GO:0010721/GO:0006468/GO:0014031/GO:0031324/GO:0001932/GO:0044271/GO:0002682/GO:0097065/GO:…	ISO/IMP/IGI/IDA/TAS/IEP/ISS/IBA/IPI	BP/MF/CC	PF00505/PF12444	Sox9	Q04887	path:mmu04024	mmu:20682	ko:K18435	cAMP signaling pathway - Mus musculus (house mouse)
ENSMUSG00000000568	7.786450557	7.725296761	7.625782502	7.270829506	7.64853147	7.609885406	7.554078416	7.541253781	7.809137176	7.75598476	7.640253166	7.500973535	7.568775302	7.378784909	7.605355619	7.48660421	7.670959208	7.513511978	7.586122699	7.598819514	heterogeneous nuclear ribonucleoprotein D	GO:0043231/GO:0006401/GO:0048519/GO:0006518/GO:0006412/GO:0006414/GO:0030054/GO:0009059/GO:0006417/GO:0006402/GO:0019899/GO:1904585/GO:0006725/GO:0035690/GO:0034654/GO:0006807/GO:0016070/GO:0043229/GO:0034641/GO:0034614/GO:0050896/GO:0050794/GO:0003729/GO:0016043/GO:0071704/GO:0046677/GO:0046483/GO:0034645/GO:0045935/GO:0050790/GO:0009299/GO:0050789/GO:0090304/GO:0031323/GO:0046700/GO:0045727/GO:…	IBA/ISO/IMP/EXP/IEA/IDA/IPI	CC/BP/MF	PF00076/PF08143	Hnrnpd	G5E8G0/Q60668/G3X9W0		mmu:11991	ko:K13044
ENSMUSG00000000581	1.28446226	1.240514583	1.674546067	1.352515265	1.392754901	1.484489478	1.459319447	1.58139275	1.318211878	1.180914942	1.464201859	1.669543744	1.185587953	1.624230484	1.279072823	1.293146728	1.589314906	1.660733114	1.393348663	1.448896266	C1D nuclear receptor co-repressor	GO:0008152/GO:0006725/GO:0008134/GO:0006807/GO:0009889/GO:0022613/GO:2001141/GO:0006915/GO:0009059/GO:0008150/GO:0008219/GO:1901360/GO:0009058/GO:0019438/GO:0043170/GO:0017053/GO:0009890/GO:0110165/GO:0019219/GO:0034641/GO:0006396/GO:0140297/GO:0042254/GO:0140110/GO:1901363/GO:0043226/GO:0034470/GO:0018130/GO:0019222/GO:1901362/GO:0005730/GO:0044085/GO:0010558/GO:2000113/GO:1901576/GO:0016070/GO:…	IEA/ISO/IDA/IPI	BP/MF/CC	PF04000	C1d	O35473	path:mmu03018	mmu:57316	ko:K12592	RNA degradation - Mus musculus (house mouse)
ENSMUSG00000000594	0.033749388	-0.144761067	0.154996856	-0.134058602	0.004565318	-0.031092875	-0.167369954	-0.147251698	0.08517234	0.033723163	-0.098097506	-0.056771182	-0.152068377	-0.069483344	-0.110451523	0.151445524	-0.141441167	-0.059231896	-0.147271461	-0.152035763	GM2 ganglioside activator protein	GO:0008150/GO:0006807/GO:1903509/GO:0008152/GO:0006665/GO:0007610/GO:0005622/GO:0006687/GO:1901564/GO:0003674/GO:0016052/GO:0009056/GO:0006689/GO:0009311/GO:0005737/GO:0006643/GO:0033036/GO:0006664/GO:0006672/GO:0043603/GO:0015929/GO:0008047/GO:0006629/GO:0043226/GO:0007611/GO:0009987/GO:0065008/GO:0004563/GO:1901575/GO:0043229/GO:0003824/GO:0043227/GO:0010876/GO:1901565/GO:0050890/GO:0016787/GO:…	IEA/IMP/IDA/HDA	BP/CC/MF	PF02221	Gm2a	Q60648/Q5F1Z8	path:mmu04142	mmu:14667	ko:K12383	Lysosome - Mus musculus (house mouse)
ENSMUSG00000000600	3.027628301	2.638774995	3.136206255	2.637847487	2.632556748	2.932856291	2.925955479	2.871237663	3.128557847	2.755819316	2.987187668	2.938850306	2.772054688	3.026766304	2.83319847	3.077591428	2.546259612	2.807664906	3.005384325	3.010427671	KRIT1 ankyrin repeat containing	GO:0007163/GO:0005543/GO:0032502/GO:0050678/GO:0005575/GO:0007275/GO:0090130/GO:0005622/GO:0032878/GO:0048870/GO:0032501/GO:0030695/GO:0006915/GO:0051241/GO:2000146/GO:0050673/GO:0030336/GO:0050680/GO:0032092/GO:0008017/GO:0051099/GO:0003824/GO:0048856/GO:0030334/GO:0005546/GO:0051093/GO:0032879/GO:0001525/GO:0003924/GO:2000181/GO:0008219/GO:0051239/GO:0051098/GO:0005911/GO:0005886/GO:0051271/GO:…	IMP/ISO/IDA/IEA/TAS/IPI	BP/MF/CC	PF00373/PF16705	Krit1	B2RUA8/Q6S5J6	path:mmu04015	mmu:79264	ko:K17705	Rap1 signaling pathway - Mus musculus (house mouse)
ENSMUSG00000000605	7.74658033	7.680022497	7.612260105	7.544797459	7.691410916	7.691541836	7.387682262	7.420397564	7.452955393	7.398941506	7.686527012	7.662567731	7.504132673	7.689237652	7.536041716	7.979369161	7.668010318	7.648661228	7.535425727	7.768332343	chloride channel voltage-sensitive 4	GO:0015299/GO:0043226/GO:0022804/GO:0015318/GO:0005737/GO:0015298/GO:0015698/GO:0005622/GO:0071944/GO:0008509/GO:0022832/GO:0006810/GO:0043227/GO:0051234/GO:0022836/GO:0008324/GO:0005773/GO:0005575/GO:0055085/GO:0031224/GO:0110165/GO:1901363/GO:0051179/GO:0003674/GO:0009987/GO:0043229/GO:1901265/GO:0005887/GO:0005886/GO:0006821/GO:0005783/GO:0031226/GO:0022803/GO:0043231/GO:0016020/GO:0043168/GO:…	IBA/ISO/IEA	MF/CC/BP	PF00654/PF00571	Clcn4	A0A1B0GT29/Q61418/Q8CBL5/Q8BQG0/Q3LRV6	path:mmu04613	mmu:12727	ko:K05012	Neutrophil extracellular trap formation - Mus musculus (house mouse)
ENSMUSG00000000627	5.051952105	4.778345464	4.957833756	4.339940264	5.180666821	4.757958747	5.116267776	4.884599756	4.672493534	5.024568253	4.50587159	4.66912427	5.504011328	4.287140379	4.986557627	5.488418329	4.64885469	4.768586759	5.388411889	4.978304591	sema domain immunoglobulin domain (Ig) TM domain and short cytoplasmic domain	GO:0022008/GO:0048864/GO:0031345/GO:0071944/GO:0010771/GO:0031344/GO:0016477/GO:0016049/GO:0051961/GO:0048863/GO:0005887/GO:0032879/GO:0014032/GO:0032502/GO:0061387/GO:0005515/GO:0006935/GO:0005488/GO:0048667/GO:0010769/GO:0071526/GO:0048858/GO:0032501/GO:0060560/GO:0005886/GO:0048666/GO:0071840/GO:0005575/GO:0014031/GO:0032535/GO:0006928/GO:2000145/GO:2000147/GO:0060284/GO:0032101/GO:0051960/GO:…	IBA/ISO/IPI/IDA/IEA	BP/CC/MF	PF01437/PF01403	Sema4f	Q9Z123	path:mmu04360	mmu:20355	ko:K06521	Axon guidance - Mus musculus (house mouse)
ENSMUSG00000000628	1.708669128	2.619996235	2.117400868	2.630640072	2.012441598	1.907541005	1.747849701	2.13633672	1.894774716	1.820319093	2.356246376	2.411279784	2.097970224	2.219697984	2.010137528	1.900464927	2.383029549	2.46071903	1.85222951	2.141803058	hexokinase 2	GO:0008104/GO:0016740/GO:2000378/GO:0006082/GO:0006091/GO:0019318/GO:0034219/GO:0050794/GO:1901342/GO:0008150/GO:0050793/GO:0009259/GO:0005829/GO:0008144/GO:2000377/GO:0055086/GO:0005737/GO:0006096/GO:1901564/GO:0005741/GO:0019200/GO:0043229/GO:0009892/GO:0034613/GO:0007275/GO:0006090/GO:0055085/GO:0016529/GO:0043231/GO:0050896/GO:0034097/GO:0009653/GO:1903008/GO:1901575/GO:0033043/GO:0005622/GO:…	ISO/IMP/IBA/IEA/IGI/HDA/IEP/IDA/IPI	BP/MF/CC	PF00349/PF03727	Hk2	O08528	path:mmu01250/path:mmu00500/path:mmu00052/path:mmu04066/path:mmu00010/path:mmu00524/path:mmu00051/path:mmu04930/path:mmu01100/path:mmu04910/path:mmu05230/path:mmu01200/path:mmu00520/path:mmu04973	mmu:15277	ko:K00844	Biosynthesis of nucleotide sugars - Mus musculus (house mouse)/Starch and sucrose metabolism - Mus musculus (house mouse)/Galactose metabolism - Mus musculus (house mouse)/HIF-1 signaling pathway - Mus musculus (house mouse)/Glycolysis / Gluconeogenesis - Mus musculus (house mouse)/Neomycin kanamycin and gentamicin biosynthesis - Mus musculus (house mouse)/Fructose and mannose metabolism - Mus mu…
ENSMUSG00000000631	6.917509268	7.410247688	7.226659134	7.375883996	7.378349062	7.037297188	7.385242417	7.379757884	7.064773987	7.048686758	7.163759304	7.298703063	7.184036555	7.244855245	7.690061231	7.489596952	7.0394018	7.208728994	7.49916982	7.422068381	myosin XVIIIA	GO:0032880/GO:0002252/GO:0099080/GO:0005794/GO:0005737/GO:0099081/GO:0032991/GO:0032940/GO:0043231/GO:1901363/GO:0005773/GO:0001775/GO:0098791/GO:0043229/GO:0099512/GO:0002694/GO:0040011/GO:0042116/GO:0043232/GO:0032879/GO:0002697/GO:0015629/GO:0098590/GO:0051047/GO:0002684/GO:0033036/GO:0099513/GO:0005886/GO:0034097/GO:0043531/GO:0000166/GO:0051716/GO:0005802/GO:0036094/GO:0051049/GO:0098862/GO:…	ISO/IMP/IDA/IEA	BP/CC/MF	PF00063/PF00595/PF01576	Myo18a	A0A1C7ZN10/B2RRE2/E9QAX2/E9Q405/Q3UIM4/Q9JMH9		mmu:360013	ko:K10362
ENSMUSG00000000632	5.588924728	5.248285813	5.123991995	5.104813559	5.781867776	5.437135396	5.413348439	5.406293675	5.277832537	5.513857722	5.262875451	5.065929513	5.447264909	5.001109076	5.455657214	5.062347955	5.160013458	5.148712349	5.400386838	5.19923715	seizure related gene 6	GO:0048519/GO:0048522/GO:0051128/GO:0045595/GO:0030154/GO:0051962/GO:0030054/GO:0005773/GO:0005615/GO:0051239/GO:0005622/GO:0048583/GO:0097447/GO:0043226/GO:0090036/GO:0051093/GO:0048666/GO:0045597/GO:0016358/GO:0048523/GO:0021680/GO:0051129/GO:0045664/GO:0032502/GO:0051094/GO:0021695/GO:0030182/GO:0051961/GO:0048699/GO:0098590/GO:0007610/GO:0060074/GO:0050808/GO:0005783/GO:0031346/GO:0097440/GO:…	IDA/IMP/IEA/IGI/ND	BP/CC/MF	PF00431/PF00084	Sez6	Q7TSK2		mmu:20370	ko:K24363
ENSMUSG00000000673	0.26012234	0.391521535	0.37754775	0.616672522	0.36655866	0.309048192	0.323385391	0.385397258	0.296973994	0.264172009	0.377816975	0.354964641	0.599789971	0.341132718	0.435505163	0.320357231	0.379874128	0.435471548	0.694837702	0.443406851	3-hydroxyanthranilate 3 4-dioxygenase	GO:0044283/GO:0043229/GO:0019752/GO:0006586/GO:0019805/GO:0031090/GO:0006520/GO:0019363/GO:0044249/GO:0043226/GO:0006139/GO:0005488/GO:0005737/GO:0006807/GO:0043227/GO:0019825/GO:0005622/GO:0019637/GO:0005575/GO:0006796/GO:0005506/GO:0005829/GO:0044271/GO:0006568/GO:0071704/GO:0005739/GO:0006082/GO:0043169/GO:0006725/GO:0036094/GO:0019362/GO:0046394/GO:0110165/GO:0055086/GO:0072524/GO:0018130/GO:…	ISO/IBA/IEA/IDA	BP/CC/MF	PF06052	Haao	Q78JT3	path:mmu01240/path:mmu01100/path:mmu00380	mmu:107766	ko:K00452	Biosynthesis of cofactors - Mus musculus (house mouse)/Metabolic pathways - Mus musculus (house mouse)/Tryptophan metabolism - Mus musculus (house mouse)
ENSMUSG00000000682	4.858400393	7.07529712	7.078437686	7.657454045	5.045175985	5.042752795	5.01005152	6.605990211	4.307679406	4.940549299	7.149637296	7.135341674	5.07249185	7.57869944	5.251795636	5.19230069	7.485231645	7.446317458	5.254312418	7.226754111	CD52 antigen	GO:0005875/GO:0005881/GO:0055080/GO:0051480/GO:0097225/GO:0005886/GO:0005858/GO:0050801/GO:0032991/GO:0005879/GO:0097649/GO:0071944/GO:0065008/GO:1990719/GO:0050896/GO:0097729/GO:0065007/GO:0005929/GO:0043228/GO:0098771/GO:0043229/GO:0055074/GO:0048878/GO:0072503/GO:0097014/GO:0097540/GO:0055082/GO:0055065/GO:0044419/GO:0099512/GO:0005622/GO:0032838/GO:1990720/GO:0005737/GO:0097650/GO:0097545/GO:…	IDA/IBA/IEP/IEA	CC/BP	PF15116	Cd52	Q3U1T8/Q64389		mmu:23833	ko:K06488
ENSMUSG00000000686	0.735390232	0.641453159	0.855196937	0.838317224	0.839724346	0.660213315	0.963990538	0.867725373	0.898686179	0.810974295	0.869036484	0.811199787	0.81706379	0.622342498	0.695755014	0.837316065	0.652200121	0.887437069	0.740895304	0.728521794	abhydrolase domain containing 15	GO:0044237/GO:0005575/GO:0110165/GO:0008152/GO:0008150/GO:0005576/GO:0003824/GO:0071704/GO:0044255/GO:0006629/GO:0016787/GO:0044238/GO:0009987/GO:0003674	IBA/IEA	BP/CC/MF		Abhd15	Q5F2F2/B6DQM2		mmu:67477	ko:K13707
ENSMUSG00000000690	7.126870863	6.802699958	6.866351411	6.530912263	7.19632445	7.15276051	7.050991698	7.212014427	6.964904844	6.920314221	6.811541076	6.932248859	7.147638578	6.708301573	7.194754672	7.19017086	6.924284725	6.712092532	7.349496289	6.777553962	homeobox B6	GO:0048513/GO:0003002/GO:0048568/GO:0044271/GO:0048598/GO:0044260/GO:0009790/GO:0032502/GO:0043227/GO:0019222/GO:0043231/GO:0043565/GO:0003676/GO:0046483/GO:0043170/GO:0044212/GO:0003700/GO:0043226/GO:0043229/GO:0032501/GO:2001141/GO:0005488/GO:1901362/GO:0048562/GO:0003677/GO:0110165/GO:0044237/GO:0003674/GO:1903506/GO:0090304/GO:0000976/GO:0048856/GO:1901363/GO:0097659/GO:0044249/GO:0005575/GO:…	IGI/IEA/IBA/IMP	BP/CC/MF	PF00046	Hoxb6	P09023		mmu:15414	ko:K09306
ENSMUSG00000000693	1.749241329	2.090934954	1.92661314	1.882020479	1.942430975	1.867213198	1.660970381	1.573631736	1.635333053	1.698873686	1.790159207	2.128894523	1.790033074	2.238929956	1.883799221	1.789529131	2.009877281	1.850127282	1.638703643	1.788818407	lysyl oxidase-like 3	GO:0046872/GO:0007399/GO:0016491/GO:0046649/GO:0018158/GO:0072539/GO:0048869/GO:1901362/GO:0032501/GO:0046639/GO:0006464/GO:0072538/GO:0071840/GO:0002820/GO:0005634/GO:0006351/GO:0018193/GO:0050777/GO:0016070/GO:0007417/GO:0006355/GO:0046637/GO:0007275/GO:0002822/GO:0048856/GO:0001968/GO:0002250/GO:0005622/GO:0043370/GO:0002286/GO:0002698/GO:0006139/GO:0043367/GO:0006725/GO:0140096/GO:1901360/GO:…	IEA/IMP/IBA/ISO/IDA/HDA	MF/BP/CC	PF01186/PF00530	Loxl3	Q9Z175		mmu:16950	ko:K00280
ENSMUSG00000000708	3.852349909	3.224399654	3.833632171	3.407829804	3.459235747	3.986817384	3.508758676	3.502712641	4.130972392	3.86595539	3.918023771	3.613832894	3.639083916	4.119704234	3.305779235	3.451806431	3.659217417	3.728144578	3.648599406	3.26000129	K(lysine) acetyltransferase 2B	GO:0010557/GO:0030291/GO:0043543/GO:0036211/GO:1902680/GO:0048869/GO:0005856/GO:0008283/GO:0043227/GO:0051254/GO:0044237/GO:0005829/GO:0048856/GO:0010563/GO:0030182/GO:0048731/GO:1902562/GO:0018393/GO:0008285/GO:0050896/GO:0010638/GO:0120035/GO:0110165/GO:0051726/GO:0010639/GO:0003824/GO:0030234/GO:0032502/GO:0010628/GO:0050794/GO:0043226/GO:0010556/GO:1990234/GO:0051960/GO:0051276/GO:0008152/GO:…	IGI/IDA/ISO/TAS/IMP/EXP/IEA/IPI	BP/MF/CC	PF06466/PF00583/PF00439	Kat2b	B2RR30/Q9JHD1	path:mmu04919/path:mmu04330/path:mmu05203/path:mmu03250/path:mmu05166	mmu:18519	ko:K06062	Thyroid hormone signaling pathway - Mus musculus (house mouse)/Notch signaling pathway - Mus musculus (house mouse)/Viral carcinogenesis - Mus musculus (house mouse)/Viral life cycle - HIV-1 - Mus musculus (house mouse)/Human T-cell leukemia virus 1 infection - Mus musculus (house mouse)
ENSMUSG00000000711	6.452258457	6.693732499	6.70725046	6.756510053	6.624318888	6.787258523	6.53238557	6.484935639	6.567270138	6.721847709	6.662243832	6.514190816	6.7134409	6.510004783	6.718184554	6.650591964	6.334578549	6.793476119	6.389795991	6.439987107	RAB5B member RAS oncogene family	GO:0017111/GO:0016818/GO:0098793/GO:0016462/GO:0071840/GO:0097159/GO:0071705/GO:0061024/GO:0016817/GO:0032549/GO:0097367/GO:0071702/GO:0005622/GO:0065007/GO:0071944/GO:0097708/GO:0070062/GO:0003924/GO:0017076/GO:0031982/GO:0003824/GO:0016787/GO:0070382/GO:0060627/GO:0098588/GO:0032555/GO:0010324/GO:0005488/GO:0032550/GO:0009987/GO:0051234/GO:0032482/GO:0006810/GO:0008150/GO:0050789/GO:0007265/GO:…	IBA/ISO/TAS/IEA/IDA/IPI	MF/CC/BP	PF00071	Rab5b	B2RPS1/P61021	path:mmu04144/path:mmu05152/path:mmu05146/path:mmu04962/path:mmu04145/path:mmu04014/path:mmu05132	mmu:19344	ko:K07888	Endocytosis - Mus musculus (house mouse)/Tuberculosis - Mus musculus (house mouse)/Amoebiasis - Mus musculus (house mouse)/Vasopressin-regulated water reabsorption - Mus musculus (house mouse)/Phagosome - Mus musculus (house mouse)/Ras signaling pathway - Mus musculus (house mouse)/Salmonella infection - Mus musculus (house mouse)
ENSMUSG00000000732	3.383442811	3.259122774	3.550083606	3.063872293	3.136941041	3.384058224	3.167003645	3.119441643	3.164988998	3.025929628	3.443723134	3.028340449	3.423486487	3.414371463	3.134506582	3.181600544	3.593879643	3.134366546	3.086023628	3.041967702	icos ligand	GO:0005515/GO:0009987/GO:0050671/GO:0005488/GO:0051249/GO:0002366/GO:0007159/GO:0097478/GO:0042089/GO:0048583/GO:0016444/GO:0002376/GO:0042097/GO:1901360/GO:0042108/GO:0042129/GO:0043170/GO:0080090/GO:0065007/GO:0042098/GO:0042113/GO:0009986/GO:0005887/GO:0042102/GO:0042107/GO:0016445/GO:0050776/GO:0042110/GO:0016447/GO:0051247/GO:0042802/GO:0005886/GO:0016020/GO:0071944/GO:0002250/GO:0001775/GO:…	IBA/TAS/IMP/NAS/ISO/IPI/IEA/IDA	MF/BP/CC	PF08205/PF07686	Icosl	Q9JHJ8/Q544C7	path:mmu04672/path:mmu04514	mmu:50723	ko:K06710	Intestinal immune network for IgA production - Mus musculus (house mouse)/Cell adhesion molecules - Mus musculus (house mouse)
ENSMUSG00000000738	5.968621638	6.199696638	6.020304748	5.842973305	6.099213431	5.884657553	5.849111342	5.81409484	5.934911254	6.029949789	5.929422716	6.057715544	5.945479794	6.114605895	6.35645596	6.057776868	5.87769328	5.987549371	6.026506005	5.745555452	SPG7 paraplegin matrix AAA peptidase subunit	GO:0016020/GO:0016021/GO:0031967/GO:0007006/GO:0110165/GO:0005575/GO:0007005/GO:0051179/GO:0050794/GO:0030554/GO:0008089/GO:0051641/GO:0004175/GO:0035639/GO:0005737/GO:0051234/GO:0043226/GO:1905710/GO:0043170/GO:0043169/GO:0008088/GO:0003824/GO:1905368/GO:1902494/GO:0046907/GO:0046930/GO:0007155/GO:0030155/GO:0035794/GO:0022610/GO:0050789/GO:1901564/GO:1901363/GO:0099111/GO:0051649/GO:0012501/GO:…	IDA/IEA/ISO/IBA/HDA/TAS/IMP/IPI	CC/BP/MF	PF06480/PF01434/PF00004/PF17862	Spg7	Q3ULF4		mmu:234847	ko:K09552
ENSMUSG00000000740	10.88489045	11.1072632	11.04071322	11.21123358	10.88051001	10.82658711	10.67289309	11.07426586	10.75229111	10.87878617	10.9957809	11.11579413	10.87995405	11.24131336	10.83833632	10.71154067	11.18688745	11.19948982	10.91442066	11.12944501	ribosomal protein L13	GO:0043228/GO:0043232/GO:0010467/GO:0043170/GO:0043229/GO:0043227/GO:0044249/GO:0034645/GO:0005840/GO:0043226/GO:0031974/GO:0043233/GO:0043231/GO:0043604/GO:0031981/GO:0044260/GO:0043043/GO:0034641/GO:0032991/GO:0005575/GO:0044238/GO:0006518/GO:0044237/GO:0005730/GO:0022626/GO:0005783/GO:0016020/GO:0022625/GO:0019538/GO:0015934/GO:0005829/GO:0070013/GO:0005737/GO:0110165/GO:0044267/GO:1901566/GO:…	IBA/ISO/IEA	CC/BP/MF	PF01294	Rpl13	P47963/Q5RKP3	path:mmu03010/path:mmu05171	mmu:270106	ko:K02873	Ribosome - Mus musculus (house mouse)/Coronavirus disease - COVID-19 - Mus musculus (house mouse)
ENSMUSG00000000743	6.600076529	7.082482844	6.621253455	6.915547725	6.779410417	6.573058298	6.645586506	6.771658428	6.60907913	6.743446906	6.648640641	6.690102313	6.921575535	6.858766751	6.632134348	6.873815273	6.857071799	6.73206548	6.779050949	6.855282242	charged multivesicular body protein 1A	GO:0061952/GO:0012505/GO:0065007/GO:0006139/GO:0045324/GO:0005886/GO:0060236/GO:0051493/GO:0045786/GO:0051656/GO:0006323/GO:0051649/GO:0044260/GO:0015031/GO:0061640/GO:0005769/GO:0051641/GO:0005768/GO:0051310/GO:0016197/GO:0033036/GO:0044271/GO:0009987/GO:0080090/GO:2000113/GO:0061024/GO:0005856/GO:0098813/GO:0005773/GO:0008150/GO:0051640/GO:0031327/GO:0060255/GO:0009892/GO:0005737/GO:0009058/GO:…	ISO/IEA/IBA/IPI	BP/CC/MF	PF03357	Chmp1a	Q921W0	path:mmu04217/path:mmu04144	mmu:234852	ko:K12197	Necroptosis - Mus musculus (house mouse)/Endocytosis - Mus musculus (house mouse)
ENSMUSG00000000751	6.824195972	7.000723576	6.57324587	7.032082794	6.740420721	6.732958236	6.646409784	6.769945933	6.539458476	6.868539646	6.666029407	7.00444116	6.874295829	6.953496733	6.554152599	7.018605841	6.772202859	6.944301457	6.719030889	6.923223396	replication protein A1	GO:0005488/GO:0006996/GO:0071840/GO:0043231/GO:0000794/GO:0042162/GO:0006974/GO:0043073/GO:0071897/GO:0005575/GO:0009987/GO:0016043/GO:0008150/GO:0043232/GO:0000795/GO:0031981/GO:0032392/GO:0006284/GO:0042127/GO:0022402/GO:1901576/GO:0043233/GO:0043565/GO:0071162/GO:0019438/GO:0005654/GO:0006281/GO:0065007/GO:0001701/GO:0016604/GO:0044249/GO:0051641/GO:0051716/GO:0010833/GO:0006289/GO:1904949/GO:…	ISO/IBA/IDA/IMP/IEA	MF/BP/CC	PF01336/PF16900/PF04057/PF08646	Rpa1	Q8VEE4/Q5SWN2/Q3U8B3	path:mmu03030/path:mmu03430/path:mmu03440/path:mmu03420/path:mmu03460	mmu:68275	ko:K07466	DNA replication - Mus musculus (house mouse)/Mismatch repair - Mus musculus (house mouse)/Homologous recombination - Mus musculus (house mouse)/Nucleotide excision repair - Mus musculus (house mouse)/Fanconi anemia pathway - Mus musculus (house mouse)
ENSMUSG00000000753	5.066656849	4.745981538	4.823981891	4.931492481	5.556480092	4.506931096	5.102124189	5.058735411	4.697249679	5.261877047	4.785093176	4.73469479	5.461304826	5.366748019	4.967829893	5.280263717	5.074590715	4.712373445	5.035869261	4.914563968	serine (or cysteine) peptidase inhibitor clade F member 1	GO:0010976/GO:0032502/GO:0010629/GO:0019899/GO:0061134/GO:0051239/GO:0010951/GO:0003006/GO:0045765/GO:0051171/GO:0001525/GO:0010941/GO:0010596/GO:0016525/GO:0005604/GO:0005515/GO:0043170/GO:0010605/GO:0061135/GO:0032501/GO:0002020/GO:0009987/GO:0010467/GO:0010632/GO:0051270/GO:0004252/GO:0051240/GO:0019538/GO:0010720/GO:0062023/GO:0032102/GO:0001568/GO:0032268/GO:0001655/GO:0010468/GO:0050790/GO:…	ISO/IDA/IBA/IMP/HDA	BP/MF/CC	PF00079	Serpinf1	P97298	path:mmu04310	mmu:20317	ko:K19614	Wnt signaling pathway - Mus musculus (house mouse)
ENSMUSG00000000759	5.251198506	5.243736524	5.057639816	5.266522154	4.869202213	4.55264851	5.037864081	4.916954824	4.849887662	5.41200682	4.552307062	5.026222618	4.804613863	5.175760086	5.045931266	4.675699127	5.068986193	5.146198999	5.375791059	4.70353994	tubulin gamma complex associated protein 3	GO:0007017/GO:0110165/GO:0099513/GO:0022607/GO:0099512/GO:0000922/GO:0008092/GO:0051011/GO:0032153/GO:0000280/GO:0007020/GO:0005737/GO:0008017/GO:0099081/GO:0031109/GO:0006996/GO:0005622/GO:0007049/GO:0003674/GO:0022414/GO:0005876/GO:0032991/GO:0044085/GO:0048285/GO:0007010/GO:0043232/GO:0007051/GO:0022402/GO:0000930/GO:0051258/GO:0051225/GO:0008150/GO:0000226/GO:0043933/GO:0046785/GO:0031122/GO:…	IEA/ISO/IBA	BP/CC/MF	PF04130/PF17681	Tubgcp3	P58854		mmu:259279	ko:K16570
ENSMUSG00000000776	4.893995812	4.395921808	4.780412214	4.713157224	4.363454533	4.801563504	4.688911484	4.463004217	4.623563595	4.501219923	4.509013117	4.973640419	4.531823992	4.922985751	4.362422921	4.52087624	4.842185759	4.444221217	4.64618718	4.870192341	polymerase (RNA) III (DNA directed) polypeptide D	GO:0044260/GO:0043229/GO:0010467/GO:0044419/GO:0061695/GO:0016772/GO:0044271/GO:0055029/GO:0000228/GO:0009605/GO:0032991/GO:0043232/GO:0071704/GO:0043231/GO:0005634/GO:0032481/GO:0005622/GO:0018130/GO:0009607/GO:0044249/GO:0034645/GO:0034062/GO:0140098/GO:0070013/GO:0065007/GO:0016607/GO:1990234/GO:1902494/GO:0009615/GO:0043227/GO:0001056/GO:0001819/GO:0031974/GO:0080134/GO:0044238/GO:0016740/GO:…	IEA/ISO/IBA/IDA/IC	BP/CC/MF	PF05132	Polr3d	Q91WD1	path:mmu03020/path:mmu04623	mmu:67065	ko:K03026	RNA polymerase - Mus musculus (house mouse)/Cytosolic DNA-sensing pathway - Mus musculus (house mouse)
ENSMUSG00000000782	1.608649172	1.604652173	1.432263673	1.735056751	1.79304496	1.576801584	1.47195424	1.787754869	1.790376165	1.681697787	1.360675516	1.681935241	1.530965642	1.644623413	1.694169073	1.466296423	1.574554804	1.598385019	1.637460599	1.612243519	transcription factor 7 T cell specific	GO:0035112/GO:0042110/GO:0065007/GO:0048731/GO:0007399/GO:0035295/GO:0003700/GO:0035239/GO:0010468/GO:0001775/GO:0010467/GO:0019219/GO:0009987/GO:0010556/GO:0043229/GO:0071704/GO:0043227/GO:0035326/GO:0003690/GO:0048608/GO:0001227/GO:0001067/GO:0070013/GO:0007267/GO:0003676/GO:0048619/GO:0001217/GO:0018130/GO:0007442/GO:0002200/GO:0048598/GO:0003677/GO:0061458/GO:0060070/GO:0045892/GO:0042127/GO:…	IGI/IEA/IDA/IMP/IBA	BP/MF/CC	PF08347/PF00505	Tcf7	Q80UF1/Q00417	path:mmu04916/path:mmu04310/path:mmu05200/path:mmu05213/path:mmu05226/path:mmu05216/path:mmu05221/path:mmu04934/path:mmu05217/path:mmu04936/path:mmu04550/path:mmu05210/path:mmu04520/path:mmu05224/path:mmu05167/path:mmu05225/path:mmu05215/path:mmu05412/path:mmu05132/path:mmu04390/path:mmu05165	mmu:21414	ko:K02620	Melanogenesis - Mus musculus (house mouse)/Wnt signaling pathway - Mus musculus (house mouse)/Pathways in cancer - Mus musculus (house mouse)/Endometrial cancer - Mus musculus (house mouse)/Gastric cancer - Mus musculus (house mouse)/Thyroid cancer - Mus musculus (house mouse)/Acute myeloid leukemia - Mus musculus (house mouse)/Cushing syndrome - Mus musculus (house mouse)/Basal cell carcinoma - …
ENSMUSG00000000787	5.314271656	4.874309338	5.425438139	4.895546319	4.879542985	5.134616786	4.801166357	5.008149606	5.093834305	5.288818293	5.416568129	5.028915485	4.858517488	5.594137333	4.946066487	5.099002459	5.68265832	5.276426581	4.430804392	4.976775527	DEAD/H (Asp-Glu-Ala-Asp/His) box polypeptide 3 X-linked	GO:1990904/GO:0006970/GO:1903902/GO:0010628/GO:0043539/GO:0006955/GO:0016055/GO:0019538/GO:0043549/GO:0043603/GO:0043412/GO:1905114/GO:0010629/GO:0034613/GO:0006952/GO:0044238/GO:0043604/GO:0006950/GO:0071704/GO:0019222/GO:0043903/GO:0010608/GO:0042254/GO:0045944/GO:0003727/GO:0006915/GO:0010646/GO:0034249/GO:0045935/GO:0048583/GO:0071470/GO:0071214/GO:0005488/GO:0005737/GO:0034248/GO:0003924/GO:…	ISO/IEA/IBA/IPI	CC/BP/MF	PF00271/PF00270	Ddx3x	Q3TQX5/Q62167/B7ZWF1	path:mmu05161/path:mmu04622/path:mmu05203	mmu:13205	ko:K11594	Hepatitis B - Mus musculus (house mouse)/RIG-I-like receptor signaling pathway - Mus musculus (house mouse)/Viral carcinogenesis - Mus musculus (house mouse)
ENSMUSG00000000791	1.161581478	1.056766422	1.114548046	1.193815236	0.935225825	0.895020388	1.127331891	1.046804763	1.1305441	1.130323894	0.901691687	0.961318024	1.056827819	0.85818219	1.501337853	0.961461595	0.89448347	1.041659054	1.158005514	1.132430534	interleukin 12 receptor beta 1	GO:0048584/GO:0032101/GO:0048518/GO:0006955/GO:0031224/GO:0031347/GO:0007155/GO:0032501/GO:0030155/GO:0080134/GO:0031226/GO:0006952/GO:0048583/GO:0002825/GO:0006950/GO:0051607/GO:0006807/GO:0002694/GO:0002684/GO:0046651/GO:0098609/GO:0006796/GO:0002819/GO:0002824/GO:0050798/GO:0050867/GO:0032943/GO:0140375/GO:0048522/GO:0050789/GO:0050863/GO:0005515/GO:0050778/GO:0032944/GO:0022610/GO:0005126/GO:…	ISO/IBA/IEA/IMP/IDA/IPI	BP/CC/MF	PF00041	Il12rb1	Q60837/A0A1D5RL98	path:mmu04658/path:mmu04630/path:mmu04659/path:mmu04060/path:mmu05321/path:mmu05200	mmu:16161	ko:K05063	Th1 and Th2 cell differentiation - Mus musculus (house mouse)/JAK-STAT signaling pathway - Mus musculus (house mouse)/Th17 cell differentiation - Mus musculus (house mouse)/Cytokine-cytokine receptor interaction - Mus musculus (house mouse)/Inflammatory bowel disease - Mus musculus (house mouse)/Pathways in cancer - Mus musculus (house mouse)
ENSMUSG00000000792	3.637859188	3.262123249	3.869024825	3.61917949	3.973653075	3.391253347	3.77276624	3.552847396	3.672812388	3.68275833	3.318638711	3.631682994	3.706671364	3.120237584	3.669816458	3.974321533	3.073571953	3.750248003	3.860125371	3.697745422	solute carrier family 5 (sodium iodide symporter) member 5	GO:0044237/GO:0051234/GO:0015698/GO:0015672/GO:0015111/GO:0008507/GO:0071944/GO:0015291/GO:0015081/GO:0046873/GO:1901615/GO:0022857/GO:0008509/GO:0051179/GO:0015103/GO:0022853/GO:0043229/GO:0055085/GO:0015318/GO:0003674/GO:0015370/GO:0110165/GO:0065007/GO:0009987/GO:0015293/GO:0015296/GO:0005215/GO:0031224/GO:0015075/GO:0043227/GO:0006820/GO:0010817/GO:0042445/GO:1901564/GO:0005886/GO:0016021/GO:…	IEA/IBA/ISO/IDA	BP/MF/CC	PF00474	Slc5a5	G3X8P5	path:mmu04918	mmu:114479	ko:K14385	Thyroid hormone synthesis - Mus musculus (house mouse)
ENSMUSG00000000794	2.41208983	2.568369127	2.633880553	2.598760799	2.530305994	2.354496315	2.405132671	2.262249878	2.546724345	2.766705571	2.511175275	2.274427128	2.620282432	2.30222172	2.313382346	2.847109464	2.500460891	2.337651618	2.239140792	2.283512676	potassium intermediate/small conductance calcium-activated channel subfamily N member 3	GO:0051234/GO:0015077/GO:0005622/GO:0042995/GO:0005575/GO:0098590/GO:0110165/GO:0005488/GO:0036477/GO:0043005/GO:0030001/GO:0015269/GO:0015318/GO:0034220/GO:0015079/GO:0022890/GO:0005515/GO:0120025/GO:0055085/GO:0005516/GO:0005227/GO:0022857/GO:0071944/GO:0005215/GO:0030054/GO:0005261/GO:0015075/GO:0015267/GO:0005737/GO:0005267/GO:0031224/GO:0030175/GO:0005216/GO:0099513/GO:0031594/GO:0006811/GO:…	ISO/IDA/IBA/IEA	BP/MF/CC	PF07885/PF02888/PF03530	Kcnn3	P58391	path:mmu04911/path:mmu04929	mmu:140493	ko:K04944	Insulin secretion - Mus musculus (house mouse)/GnRH secretion - Mus musculus (house mouse)
ENSMUSG00000000804	6.272834484	5.903781928	6.186050983	6.107553451	6.001475035	6.255436065	5.949835628	6.010398034	6.312465529	6.535387644	6.223610415	5.75249857	6.376186919	5.711868045	5.829740865	6.356091842	5.689521658	5.763527206	5.87899053	5.799156226	ubiquitin specific peptidase 32	GO:0008234/GO:0005622/GO:0008233/GO:0004843/GO:0005575/GO:0005773/GO:0016020/GO:0043231/GO:0070011/GO:0043229/GO:0012505/GO:0043227/GO:0003824/GO:0043226/GO:0005886/GO:0005737/GO:0005829/GO:0005794/GO:0071944/GO:0036459/GO:0016787/GO:0140096/GO:0003674/GO:0019783/GO:0110165/GO:0101005	IBA/ISO	MF/CC	PF00443/PF13202/PF06337	Usp32	F8VPZ3/Q6PD17		mmu:237898	ko:K11837
ENSMUSG00000000805	4.522928887	4.997798193	4.543501475	4.863943752	4.859051873	4.834836125	4.624015788	4.394660233	4.975208571	5.021550772	4.585433796	4.756216658	4.456303293	4.828076522	4.782763182	4.631148109	4.253675987	4.643847518	4.930364691	4.485985536	carbonic anhydrase 4	GO:0019755/GO:0009897/GO:0031224/GO:0030659/GO:0003674/GO:0009986/GO:0016836/GO:0098590/GO:0015893/GO:0030141/GO:0098858/GO:0120025/GO:0030658/GO:0016829/GO:0012506/GO:0031226/GO:0030667/GO:0110165/GO:0003824/GO:0015629/GO:1903561/GO:0031090/GO:0098771/GO:0097708/GO:0099503/GO:0015701/GO:0099513/GO:0098805/GO:0030133/GO:0016324/GO:0016528/GO:0005575/GO:0016020/GO:0015669/GO:0015670/GO:0031225/GO:…	IC/ISO/IEA/IDA/IPI	BP/CC/MF	PF00194	Car4	Q64444	path:mmu01100/path:mmu04964/path:mmu00910	mmu:12351	ko:K18246	Metabolic pathways - Mus musculus (house mouse)/Proximal tubule bicarbonate reclamation - Mus musculus (house mouse)/Nitrogen metabolism - Mus musculus (house mouse)
ENSMUSG00000000811	4.411678701	4.538032064	4.088467369	4.385401747	4.268314009	4.379944568	4.618967266	4.36389995	4.331560364	4.202006678	4.407024943	4.489771803	4.269168242	4.319751345	4.071916813	4.512516572	4.337348865	4.469195049	4.627577125	4.63707401	thioredoxin reductase 3	GO:0043231/GO:0015036/GO:0005622/GO:0015035/GO:0012505/GO:0009987/GO:0032504/GO:0071944/GO:0070013/GO:0016667/GO:0009792/GO:0048609/GO:0034641/GO:0005783/GO:0036094/GO:0044703/GO:0016651/GO:0045454/GO:0071704/GO:0005737/GO:0003674/GO:0005575/GO:0005739/GO:0043603/GO:0005654/GO:0032502/GO:0005773/GO:0032501/GO:0000003/GO:0007275/GO:0048037/GO:0016668/GO:0065008/GO:0065007/GO:0001824/GO:0048232/GO:…	IBA/ISO/IEA/IDA/IMP/IPI	CC/MF/BP	PF02852/PF00462/PF07992	Txnrd3	Q99MD6/Q3UY43	path:mmu00450/path:mmu05200/path:mmu05225	mmu:232223	ko:K22182	Selenocompound metabolism - Mus musculus (house mouse)/Pathways in cancer - Mus musculus (house mouse)/Hepatocellular carcinoma - Mus musculus (house mouse)
ENSMUSG00000000823	2.271884902	2.571574942	2.466449862	2.039363344	2.265997228	2.038930714	2.267412141	2.262471175	2.22958973	2.460996714	1.992329632	2.120377179	2.536785549	2.081027151	2.25215839	2.165584118	2.274225471	2.450036561	2.238657114	2.346172834	zinc finger protein 512B	GO:0043229/GO:0043231/GO:0005622/GO:0008150/GO:0005575/GO:0110165/GO:0043226/GO:0043227/GO:0005634/GO:0003674	IBA/ND	CC/BP/MF		Zfp512b	B7ZCR6/Q6ZPW1		mmu:269401
ENSMUSG00000000826	7.943824266	7.378380257	7.724802144	7.495297261	7.948456872	8.145633681	7.729017884	7.786733774	8.03980288	7.757846956	7.856566528	7.55467645	7.737677154	7.301690997	7.722746329	7.812306493	7.375957691	7.219035111	8.020238815	7.450856893	DnaJ heat shock protein family (Hsp40) member C5	GO:0043067/GO:0005886/GO:0012505/GO:0031300/GO:0042981/GO:0005575/GO:0005773/GO:0031982/GO:0043008/GO:0031410/GO:0005622/GO:0051179/GO:0009987/GO:0050794/GO:0043066/GO:0005737/GO:0008150/GO:0008021/GO:0050789/GO:0032879/GO:0008219/GO:0043069/GO:0006810/GO:0051641/GO:0006457/GO:0031225/GO:0031594/GO:1901215/GO:0051049/GO:0051649/GO:0030054/GO:0098693/GO:0030672/GO:0006915/GO:0043231/GO:0051234/GO:…	IGI/IDA/ISO/IMP/IPI/IEA	BP/CC/MF	PF00226	Dnajc5	P60904	path:mmu04141	mmu:13002	ko:K09525	Protein processing in endoplasmic reticulum - Mus musculus (house mouse)
ENSMUSG00000000827	6.166236583	6.338319221	6.326888221	6.697168615	6.509522352	6.409919794	6.321879297	6.342301004	6.369355623	6.43546436	6.280159204	6.427982341	5.92967802	6.526913093	6.433744765	6.188509363	6.360982764	6.400429959	6.16390178	6.583097682	tumor protein D52-like 2	GO:0110165/GO:0008150/GO:0048471/GO:0046982/GO:0005622/GO:0046983/GO:0042803/GO:0003674/GO:0005737/GO:0005575/GO:0005488/GO:0005515/GO:0042802	ISO/ND	CC/BP/MF	PF04201	Tpd52l2	Q9CYZ2/Q8BKP1/Q3TUJ9/Q3TAI4/A2AUD5		mmu:66314
ENSMUSG00000000838	3.73300987	3.558231365	4.072938357	3.633793123	3.847214239	4.344694344	4.020137502	3.739981375	4.342807514	3.938393202	3.957072001	3.855350962	4.003033654	3.922685318	3.828591878	3.542761159	4.332704991	3.504301314	3.344391414	4.108581918	fragile X mental retardation 1	GO:0050803/GO:0035197/GO:0050804/GO:0150034/GO:0010467/GO:0006796/GO:0010558/GO:0006464/GO:0044297/GO:0006725/GO:0016020/GO:0046483/GO:0010975/GO:0032501/GO:0030154/GO:0006417/GO:0030163/GO:0071704/GO:0005773/GO:0050805/GO:0051851/GO:0019222/GO:0050806/GO:0065007/GO:0030175/GO:0005737/GO:0005783/GO:0032940/GO:0010970/GO:0044309/GO:0032268/GO:0010959/GO:0005488/GO:0051924/GO:0006793/GO:0044306/GO:…	IMP/ISO/IBA/IDA/IEA/IGI/IPI	BP/MF/CC	PF18336/PF17904/PF00013/PF16098/PF05641/PF12235	Fmr1	Q6AXB7/Q8BPK8/E9QNF5/E9QAT0/Q547R0		mmu:14265	ko:K15516
ENSMUSG00000000861	4.971428749	4.88690973	4.635549241	4.234568793	5.03603656	5.072375003	4.803645112	5.293581396	5.182096542	4.947127641	4.678321823	4.741301765	5.008455726	4.459605833	4.412198961	4.573167446	4.424622262	4.781481275	5.01019798	4.89101482	B cell CLL/lymphoma 11A (zinc finger protein)	GO:0010468/GO:0071840/GO:0005488/GO:0030308/GO:0031175/GO:2000173/GO:0043565/GO:0071704/GO:0048640/GO:0048671/GO:0030307/GO:0048666/GO:0050789/GO:0048589/GO:0044212/GO:2000172/GO:0005575/GO:0030217/GO:0010467/GO:0005622/GO:0048668/GO:0010975/GO:0043412/GO:0003714/GO:2000171/GO:0090066/GO:0005515/GO:0048667/GO:0048670/GO:0010628/GO:0043233/GO:0097659/GO:0030183/GO:2000113/GO:0048639/GO:0048638/GO:…	IMP/ISO/IBA/IDA/IPI/IEA	BP/MF/CC	PF00096	Bcl11a	Q3US10/Q3TP99/Q9QYE3/Q5STS9		mmu:14025	ko:K22045
ENSMUSG00000000876	4.336094582	4.709514117	4.255935209	4.870313584	4.433308543	4.229224768	4.594877043	4.721463288	4.59374195	4.613194785	4.510616154	4.94146877	4.406055709	4.202363571	4.436701091	4.30408442	4.751817704	4.683606407	4.44194381	4.609672327	peroxisomal membrane protein 4	GO:0005575/GO:0043226/GO:0031090/GO:0110165/GO:0043227/GO:0016020/GO:0005778/GO:0031903/GO:0005737/GO:0005777/GO:0005622/GO:0042579/GO:0098805/GO:0008150/GO:0043231/GO:0043229/GO:0003674/GO:0016021/GO:0031224/GO:0098588	IEA/ISO/ND	CC/BP/MF		Pxmp4	Q9JJW0	path:mmu04146	mmu:59038	ko:K13350	Peroxisome - Mus musculus (house mouse)
ENSMUSG00000000881	5.708950632	5.804512405	5.705481012	5.627678258	5.741939393	5.833109657	5.604219618	5.798426117	5.630772948	5.677683022	5.599436406	5.619555192	5.90685498	5.478975007	5.560180682	5.669923389	5.591737388	5.480943622	5.836383336	5.925034025	discs large MAGUK scaffold protein 3	GO:0005886/GO:0048856/GO:0031224/GO:0099572/GO:0099634/GO:0008150/GO:0045860/GO:0006464/GO:0016323/GO:0060255/GO:0098984/GO:0080090/GO:0006468/GO:0048523/GO:0031503/GO:0043198/GO:0031401/GO:0006793/GO:0051668/GO:0003674/GO:0048729/GO:0033674/GO:0071944/GO:0008328/GO:0019899/GO:0031399/GO:0098794/GO:0099072/GO:0031323/GO:0031226/GO:0005887/GO:0099186/GO:0031325/GO:0061097/GO:0034702/GO:0098609/GO:…	IDA/IMP/IBA/ISO/IPI	CC/BP/MF	PF00625/PF10600/PF00018/PF00595/PF10608	Dlg3	P70175/A2BEF2/Q52KF7/A2BEE9	path:mmu05165/path:mmu04530/path:mmu04390	mmu:53310	ko:K21098	Human papillomavirus infection - Mus musculus (house mouse)/Tight junction - Mus musculus (house mouse)/Hippo signaling pathway - Mus musculus (house mouse)
ENSMUSG00000000884	2.528645383	2.623823276	2.429509028	2.648151542	2.919844555	2.291490967	2.418531713	2.731695756	2.729585908	2.358836038	2.591973201	2.843962215	2.906552996	2.453168686	2.878348215	2.31830091	2.906670862	2.880032225	2.239477811	2.219007146	guanine nucleotide binding protein (G protein) beta polypeptide 1-like	GO:0003674/GO:0051703/GO:0035176/GO:0005622/GO:0005575/GO:0005737/GO:0007610/GO:0008150/GO:0110165	ND/IMP/IDA	MF/BP/CC	PF00400	Gnb1l	Q9EQ15/Q3TM20/Q3TZ04		mmu:13972	ko:K24732
ENSMUSG00000000901	3.188152887	3.215101233	3.206064597	3.96751712	3.296209432	3.267168749	3.262141309	3.487928248	3.182906182	2.951843919	3.332075108	3.422704484	3.540040549	3.081942841	3.557374443	3.257248302	3.667897082	3.073830219	3.645999856	3.163244921	matrix metallopeptidase 11	GO:0043167/GO:0043169/GO:0016787/GO:0043062/GO:0110165/GO:0048856/GO:0019538/GO:0009987/GO:0008152/GO:0008150/GO:0043170/GO:0048869/GO:0007275/GO:0005576/GO:1901564/GO:0032963/GO:0005575/GO:0030199/GO:0005615/GO:0031012/GO:0046914/GO:0009056/GO:0030198/GO:0045599/GO:0003824/GO:0008237/GO:0005488/GO:0030154/GO:0045598/GO:0045444/GO:0048519/GO:0140096/GO:0004222/GO:0030574/GO:0050793/GO:0006508/GO:…	IEA/IMP/ISO/IBA/IDA/IC	MF/BP/CC	PF00413/PF00045	Mmp11	Q02853/Q3UQT3		mmu:17385	ko:K07993
ENSMUSG00000000902	6.457915679	6.587444454	6.487008373	6.564780728	6.606787818	6.323566589	6.491163048	6.446954987	6.216146119	6.456689657	6.308779608	6.624881597	6.619507068	6.725784292	6.439046016	6.685037764	6.540162918	6.63575066	6.523195665	6.470056672	SWI/SNF related matrix associated actin dependent regulator of chromatin subfamily b member 1	GO:0022411/GO:0048519/GO:0048522/GO:0048518/GO:0005730/GO:0046483/GO:0005515/GO:0008134/GO:0048523/GO:0071565/GO:1902494/GO:0045944/GO:0071684/GO:0007275/GO:0043231/GO:0090305/GO:0071824/GO:0071704/GO:0005575/GO:0006996/GO:0006333/GO:0006725/GO:0070013/GO:0005634/GO:0023052/GO:0071564/GO:0032268/GO:0005654/GO:0090503/GO:0032269/GO:0046782/GO:0032259/GO:0044093/GO:0044237/GO:0005720/GO:0097159/GO:…	ISO/IMP/IPI/IDA/IBA/IEA	BP/CC/MF	PF04855	Smarcb1	Q6ZWP4/Q9Z0H3/Q3UDA4	path:mmu04714/path:mmu05225/path:mmu03250	mmu:20587	ko:K11648	Thermogenesis - Mus musculus (house mouse)/Hepatocellular carcinoma - Mus musculus (house mouse)/Viral life cycle - HIV-1 - Mus musculus (house mouse)
ENSMUSG00000000915	1.4871778	1.452020031	1.570926357	1.312382145	1.55447349	1.506362942	1.816888776	1.781705948	1.291266148	1.624192163	1.564612011	1.380023385	1.556619117	1.437756967	1.944309327	1.656261135	1.320830489	1.459785706	1.579561055	1.471262016	huntingtin interacting protein 1 related	GO:0044057/GO:0031333/GO:0051179/GO:0006807/GO:0044237/GO:0005856/GO:0032092/GO:0043933/GO:1902108/GO:0032268/GO:0031325/GO:0044085/GO:0050794/GO:0010647/GO:1902110/GO:0005886/GO:0061024/GO:0030125/GO:0006508/GO:0097190/GO:0044238/GO:0032051/GO:0003674/GO:0005829/GO:0010941/GO:0030276/GO:0120025/GO:0010822/GO:0110165/GO:0043068/GO:0008150/GO:0010821/GO:1901981/GO:0060627/GO:0030128/GO:0010641/GO:…	IMP/IDA/IC/IBA/ISO/IEA/IPI/ISS/NAS/IGI	BP/CC/MF	PF16515/PF01608/PF07651	Hip1r	Q9JKY5		mmu:29816	ko:K20040
ENSMUSG00000000916	4.155923989	3.845162248	4.21387983	4.096699512	4.014702801	4.003585587	3.850742778	3.981035989	4.172191407	4.102638501	3.755662949	3.935616416	4.238871749	3.669846787	3.764325224	4.290549486	3.953489467	3.634677007	4.157517839	3.998247029	NOL1/NOP2/Sun domain family member 5	GO:0046483/GO:0006725/GO:0006807/GO:0044238/GO:0006396/GO:0008150/GO:1901363/GO:0006139/GO:0043229/GO:0110165/GO:0070013/GO:0044260/GO:0044237/GO:0043226/GO:0009987/GO:1901360/GO:0071840/GO:0044085/GO:0034660/GO:0010467/GO:0043227/GO:0005575/GO:0071704/GO:0008152/GO:0043228/GO:0070475/GO:0090304/GO:0034641/GO:0006364/GO:0005634/GO:0016070/GO:0000154/GO:0031981/GO:0043170/GO:0016741/GO:0043232/GO:…	IBA/IEA/ISO	BP/MF/CC	PF01189	Nsun5	Q8K4F6		mmu:100609	ko:K15264
ENSMUSG00000000934	4.659970274	4.352404623	4.580794541	4.846288842	4.468632009	4.234753032	4.630144424	4.429627739	4.454761587	4.582971379	4.342764185	4.348334378	4.581764399	4.876133262	4.628111893	5.035828499	4.95497762	4.433797359	4.689262193	4.543031698	DNA topoisomerase 1 mitochondrial	GO:0110165/GO:0097159/GO:0071704/GO:0071897/GO:0044260/GO:0005575/GO:0044271/GO:0043226/GO:0005622/GO:1901576/GO:0071103/GO:0043229/GO:0034645/GO:0043170/GO:0034641/GO:0016853/GO:0071840/GO:0031974/GO:0044249/GO:0043228/GO:0051276/GO:0009295/GO:0009987/GO:0090304/GO:0043233/GO:0042645/GO:0034654/GO:0005488/GO:0003677/GO:0003676/GO:1901362/GO:0016043/GO:0008150/GO:0140097/GO:0070013/GO:0009058/GO:…	IEA/IBA/ISO/HDA	CC/MF/BP	PF01028/PF14370/PF02919	Top1mt	Q8R4U6		mmu:72960	ko:K03163
ENSMUSG00000000938	4.950173831	5.446093562	5.459475264	4.802869186	5.943672729	4.530769263	5.887883676	5.732724884	5.931982289	5.743448188	5.628625082	5.878314766	5.834180978	5.307567181	5.150262119	5.517205021	4.81610026	5.540845944	5.955243347	5.520259522	homeobox A10	GO:0007338/GO:0007276/GO:0034654/GO:0031325/GO:0007275/GO:0006807/GO:0051252/GO:0035107/GO:0009987/GO:0035326/GO:0042826/GO:0034641/GO:0007548/GO:0010467/GO:0043565/GO:0034645/GO:0006725/GO:0043227/GO:0031323/GO:0031326/GO:0051254/GO:0044238/GO:0051704/GO:0035113/GO:0006357/GO:0090304/GO:0043231/GO:0032502/GO:0046546/GO:1901360/GO:0035108/GO:0044237/GO:0003002/GO:0043170/GO:0097159/GO:0032774/GO:…	IGI/IEA/ISO/IDA/TAS	BP/MF/CC	PF00046	Hoxa10	P31310	path:mmu05202	mmu:15395	ko:K17443	Transcriptional misregulation in cancer - Mus musculus (house mouse)
ENSMUSG00000000942	3.641847539	3.552295967	3.734959491	4.363544834	3.957107314	3.88018392	3.720804405	3.784397136	3.551722793	3.440394265	3.628326196	3.602249322	3.767516472	3.864299419	4.521328911	3.941645265	3.372367556	4.43066896	3.729087878	3.974031031	homeobox A4	GO:2000112/GO:1903506/GO:1990837/GO:0008150/GO:2001141/GO:0009059/GO:0032774/GO:1901363/GO:0003676/GO:0034641/GO:0001228/GO:0032501/GO:0048562/GO:0032502/GO:1901576/GO:0140297/GO:0018130/GO:1901362/GO:0001501/GO:0003002/GO:0010468/GO:0080090/GO:0000981/GO:0003674/GO:0031323/GO:0008152/GO:0071704/GO:0097159/GO:0140110/GO:0019438/GO:0031326/GO:0034645/GO:0009887/GO:0001067/GO:0044260/GO:0048513/GO:…	IEA/IMP/IBA/TAS/IDA/IGI/ISO	BP/MF/CC	PF00046	Hoxa4	P06798/A0A0R4J193		mmu:15401	ko:K09304
ENSMUSG00000000957	4.949293936	5.514840937	5.703153687	6.372115752	5.145920841	4.676254167	4.948710989	5.431385872	5.105974965	4.856479586	6.105762043	5.725340834	5.112851648	6.043654138	5.02785917	4.947981473	5.687853461	5.447750076	5.146584739	5.79305458	matrix metallopeptidase 14 (membrane-inserted)	GO:0048523/GO:0051604/GO:0007044/GO:0008237/GO:0051641/GO:0071840/GO:0008152/GO:0016787/GO:0048534/GO:0060349/GO:0031323/GO:0048562/GO:0060348/GO:0004222/GO:0050867/GO:0071704/GO:0032268/GO:0005829/GO:0044238/GO:0048706/GO:0016485/GO:0005773/GO:0110165/GO:0006928/GO:0003824/GO:1905523/GO:0050864/GO:0051149/GO:0022610/GO:0008233/GO:0031410/GO:0031982/GO:0010646/GO:0050871/GO:0050896/GO:0001501/GO:…	ISO/IEA/IBA/IDA/IMP/IGI	BP/MF/CC	PF00413/PF11857/PF01471/PF00045	Mmp14	P53690	path:mmu04668/path:mmu04928/path:mmu04912	mmu:17387	ko:K07763	TNF signaling pathway - Mus musculus (house mouse)/Parathyroid hormone synthesis secretion and action - Mus musculus (house mouse)/GnRH signaling pathway - Mus musculus (house mouse)
ENSMUSG00000000958	2.887189903	3.558976327	3.486577404	3.821771077	2.78814747	3.099483437	2.688223091	3.158947199	2.954416781	2.830868015	3.267059661	3.417883862	2.847210642	3.894705953	2.870282038	3.025811101	3.672575969	3.449012422	2.809697861	3.386933011	solute carrier family 7 (cationic amino acid transporter y+ system) member 7	GO:0034220/GO:0006520/GO:0006865/GO:0034641/GO:0006811/GO:0006082/GO:0008514/GO:0005575/GO:0005342/GO:0009064/GO:0008150/GO:0050794/GO:0006525/GO:0008152/GO:0042180/GO:0006807/GO:0055085/GO:0015179/GO:0005886/GO:0071704/GO:0006810/GO:0062012/GO:0071705/GO:0080090/GO:0015318/GO:0051171/GO:0033238/GO:0051179/GO:0006820/GO:0065007/GO:0043436/GO:0051234/GO:0071702/GO:0015171/GO:0015075/GO:0008509/GO:…	IBA/IEA/IMP	BP/MF/CC	PF13520	Slc7a7	Q9Z1K8	path:mmu04974	mmu:20540	ko:K13867	Protein digestion and absorption - Mus musculus (house mouse)
ENSMUSG00000000959	6.634642479	6.721703661	6.579215347	6.563530448	6.956353743	6.247755222	6.622697953	6.500389193	6.638280683	6.695098464	6.642288254	6.549445015	6.736105046	6.696904124	6.502649215	6.009012305	6.44760016	6.564963752	6.692960081	6.625798901	oxidase assembly 1-like	GO:0008152/GO:0007005/GO:0003674/GO:0008104/GO:0110165/GO:0065003/GO:0097177/GO:0008535/GO:0090151/GO:0015031/GO:0043461/GO:0007006/GO:0031090/GO:0009892/GO:0006996/GO:0055114/GO:0005488/GO:0009987/GO:0071702/GO:0043226/GO:0009060/GO:0071840/GO:0008150/GO:0090150/GO:0051649/GO:0032978/GO:0043462/GO:0010257/GO:0070585/GO:0098573/GO:0072594/GO:0043086/GO:0031966/GO:0031224/GO:0051641/GO:0043231/GO:…	ISO/IBA/HDA/IEA	BP/MF/CC	PF02096	Oxa1l	Q8BGA9	path:mmu03060	mmu:69089	ko:K03217	Protein export - Mus musculus (house mouse)
ENSMUSG00000000976	4.759858144	4.53070646	4.721284599	4.726615936	4.468880269	4.445999572	4.061606984	4.345613896	4.821996196	4.511343294	4.576021151	4.75279792	4.077089894	4.6683494	4.362990916	4.298819589	4.837567573	4.086870648	4.276398657	4.331331683	HEAT repeat containing 6	GO:0005575/GO:0008150	ND	CC/BP	PF13251	Heatr6	Q6P1G0		mmu:217026	ko:K24815
ENSMUSG00000000982	2.838566109	3.991464408	4.711009033	4.61680113	2.748909197	3.223115087	2.725189293	3.836273091	2.700951181	2.899608056	4.715885663	3.99643447	2.917145394	4.6492358	3.160006541	3.091857431	4.583050222	4.191523835	2.873498421	4.059161709	chemokine (C-C motif) ligand 3	GO:0110165/GO:0008150/GO:0048020/GO:0050714/GO:0030545/GO:0048018/GO:0023014/GO:0033036/GO:0032940/GO:0006810/GO:0050706/GO:0050702/GO:0065007/GO:0032879/GO:0003674/GO:0006935/GO:0006950/GO:0006874/GO:0048247/GO:0006873/GO:0045944/GO:0032612/GO:0032640/GO:0030003/GO:0048518/GO:0022603/GO:0048522/GO:0050727/GO:0031325/GO:0097529/GO:0023051/GO:0030154/GO:0046483/GO:0098772/GO:0030099/GO:0048513/GO:…	IBA/IGI/IEA/ISO/IDA/IMP/IPI	CC/BP/MF	PF00048	Ccl3	Q5QNW0/P10855	path:mmu04620/path:mmu04060/path:mmu05417/path:mmu04061/path:mmu05142/path:mmu05163/path:mmu05323/path:mmu04062	mmu:20302	ko:K05408	Toll-like receptor signaling pathway - Mus musculus (house mouse)/Cytokine-cytokine receptor interaction - Mus musculus (house mouse)/Lipid and atherosclerosis - Mus musculus (house mouse)/Viral protein interaction with cytokine and cytokine receptor - Mus musculus (house mouse)/Chagas disease - Mus musculus (house mouse)/Human cytomegalovirus infection - Mus musculus (house mouse)/Rheumatoid art…
ENSMUSG00000001016	5.425830809	5.22798922	5.501224153	5.196098354	5.031296525	5.576935738	5.411843595	4.984680105	5.283118515	5.296201103	5.444556077	5.095568874	5.308770854	5.415125613	5.012006698	5.058270734	5.711393084	5.223856853	5.07411148	5.436883467	interleukin enhancer binding factor 2	GO:0070013/GO:0005737/GO:0065007/GO:0050896/GO:0097159/GO:0005634/GO:0005730/GO:0051171/GO:0060255/GO:0051254/GO:0044237/GO:0006725/GO:0050789/GO:0003674/GO:0005575/GO:0051252/GO:1901360/GO:0006351/GO:0032559/GO:0043228/GO:0043232/GO:0043231/GO:0006355/GO:0043168/GO:0036094/GO:0019219/GO:0043229/GO:0005622/GO:1903506/GO:0006139/GO:0046483/GO:1901363/GO:0044260/GO:0005524/GO:0097367/GO:0080090/GO:…	IDA/IEA/ISO	CC/BP/MF	PF07528	Ilf2	Q9CXY6		mmu:67781	ko:K13089
ENSMUSG00000001017	6.950001035	6.824859133	7.108685365	6.940123438	7.014609944	6.68407202	7.076013512	7.032670416	7.001351989	6.813039735	6.902080087	6.843370356	6.915604063	7.206636098	6.808356093	7.333345691	7.112522875	6.876727946	6.95510533	7.196723598	chromatin target of PRMT1	GO:0032501/GO:0009792/GO:0005515/GO:0008150/GO:0005634/GO:0043231/GO:0043229/GO:0110165/GO:0009790/GO:0005488/GO:0003674/GO:0043227/GO:0001701/GO:0003676/GO:0043226/GO:0007275/GO:0097159/GO:0043009/GO:0048856/GO:0003723/GO:0005622/GO:0005575/GO:1901363/GO:0032502	IMP/IPI/IEA	BP/MF/CC	PF13865	Chtop	Q9CY57/E9PW20/B7ZMS6		mmu:66511
ENSMUSG00000001018	6.495773763	6.548797786	6.807237368	6.661315762	6.177283992	6.831355646	6.483144553	6.304188553	6.637431382	6.710501701	6.690495594	6.935084961	6.467499578	6.822989041	6.22055297	6.259345481	6.790883995	6.632030842	6.099754752	6.519875775	SNAP-associated protein	GO:0007034/GO:0051961/GO:0005773/GO:0055067/GO:0110165/GO:0030003/GO:0016079/GO:0051960/GO:0099643/GO:0051650/GO:0030030/GO:0051241/GO:0007017/GO:0016050/GO:0046907/GO:0023052/GO:0051656/GO:0005737/GO:0006928/GO:0005764/GO:0047496/GO:0005488/GO:0051649/GO:0001505/GO:0030004/GO:0048284/GO:0051604/GO:0140029/GO:0023051/GO:0023061/GO:0016192/GO:0046928/GO:0051641/GO:0051588/GO:0051640/GO:0065008/GO:…	IBA/IGI/IMP/IDA/ISO/IEA/IPI/NAS/TAS	BP/CC/MF	PF14712	Snapin	Q9Z266		mmu:20615	ko:K20002
ENSMUSG00000001020	3.154532298	4.412333948	4.619485226	4.707615949	3.581054843	3.493363046	3.082182243	3.814959263	2.816294321	3.150444938	4.782807409	4.470385301	3.01798016	4.440531288	4.216955389	3.289850239	4.727221941	4.421126459	3.21467692	4.313832479	S100 calcium binding protein A4	GO:0006725/GO:0007165/GO:0034654/GO:0050794/GO:0046483/GO:1902533/GO:0042995/GO:0051090/GO:0048522/GO:0008092/GO:1902531/GO:0005886/GO:0034645/GO:0050786/GO:0035556/GO:0044260/GO:0080090/GO:0051092/GO:1903506/GO:0008152/GO:0043229/GO:1901360/GO:0043169/GO:0043226/GO:0010647/GO:0050789/GO:0043167/GO:0051091/GO:0043231/GO:0043123/GO:0019438/GO:0009059/GO:0050896/GO:0044271/GO:0043122/GO:0007249/GO:…	ISO/IDA/IEA/IPI	BP/CC/MF	PF01023	S100a4	P07091/Q545V2		mmu:20198	ko:K23761
ENSMUSG00000001021	-0.100718793	0.237408345	-0.1927691	-0.087419329	-0.21359713	-0.195648166	-0.11429803	-0.190005856	-0.229772217	-0.203710564	0.117980566	-0.208945352	-0.201926814	-0.037923312	-0.160783238	-0.151869432	0.013758146	-0.210178853	-0.197390711	-0.015446873	S100 calcium binding protein A3	GO:0005622/GO:0031981/GO:0110165/GO:0008270/GO:0005509/GO:0043169/GO:0005634/GO:0043231/GO:0003674/GO:0005488/GO:0043233/GO:0005576/GO:0005737/GO:0005575/GO:0043226/GO:0043227/GO:0046914/GO:0070013/GO:0043232/GO:0062023/GO:0043228/GO:0043229/GO:0046872/GO:0031012/GO:0031974/GO:0005829/GO:0043167/GO:0005730	ISO/IEA/HDA	CC/MF	PF01023	S100a3	P62818/Q496W1		mmu:20197	ko:K23760
ENSMUSG00000001025	6.89642058	8.860732522	8.730192727	9.189552359	6.475825301	6.959839674	6.410692088	7.914779982	6.492529162	6.240709992	9.119138333	8.535220746	6.740128544	9.005519921	7.046042473	6.522998442	9.253384826	8.862520364	6.711441749	8.780437499	S100 calcium binding protein A6 (calcyclin)	GO:0043169/GO:0046914/GO:0042995/GO:0043167/GO:0012505/GO:0048306/GO:0046872/GO:0043226/GO:0044548/GO:0042803/GO:0005488/GO:0043227/GO:0003674/GO:0005773/GO:0071944/GO:0019898/GO:0110165/GO:0022857/GO:0043231/GO:0016020/GO:0031975/GO:0015075/GO:0042802/GO:0031234/GO:0005622/GO:0005509/GO:0031967/GO:0008270/GO:0005215/GO:0005829/GO:0097478/GO:0046983/GO:0005886/GO:0005737/GO:0009898/GO:0019897/GO:…	IDA/ISO/IEA/IPI/HDA	MF/CC	PF01023	S100a6	P14069/Q545I9		mmu:20200	ko:K23764
ENSMUSG00000001029	3.449264507	3.490299086	3.312422548	3.514681109	3.259307329	3.685525477	3.756177022	3.508419885	3.568352863	3.508633498	3.371422952	3.682666348	3.429362472	3.378728454	3.801720489	3.639075307	3.080081562	3.70711208	3.482175879	3.310902357	intercellular adhesion molecule 2	GO:0003674/GO:0005488/GO:0009987/GO:0031224/GO:0007155/GO:0015629/GO:0005887/GO:0032154/GO:0016021/GO:0099080/GO:0050839/GO:0008150/GO:0110165/GO:0031226/GO:0005886/GO:0005902/GO:0005515/GO:0098858/GO:0016020/GO:0022610/GO:0098590/GO:0044877/GO:0042995/GO:0005575/GO:0005622/GO:0005102/GO:0005856/GO:0005884/GO:0031254/GO:0099081/GO:0099513/GO:0043232/GO:0071944/GO:0043229/GO:0005178/GO:0032153/GO:…	IPI/ISO/IEA/IBA/IDA	MF/BP/CC	PF03921	Icam2	P35330	path:mmu04514/path:mmu04650	mmu:15896	ko:K06523	Cell adhesion molecules - Mus musculus (house mouse)/Natural killer cell mediated cytotoxicity - Mus musculus (house mouse)
ENSMUSG00000001034	3.985957921	3.727994526	3.816917785	3.920065528	3.673534925	3.192117894	3.501901765	3.602375674	3.74868865	3.658170773	3.647631882	3.559821647	3.474088042	3.966989247	4.192454788	3.680817653	3.332194858	3.819386907	3.742779979	3.72519012	mitogen-activated protein kinase 7	GO:0072358/GO:0070884/GO:0070887/GO:0009968/GO:0006139/GO:0006468/GO:0048585/GO:0006357/GO:0006725/GO:0010468/GO:0005737/GO:0006469/GO:0071559/GO:0009966/GO:0005829/GO:0007165/GO:0097720/GO:0006355/GO:0098609/GO:0048583/GO:0010467/GO:0006464/GO:0071236/GO:1904019/GO:0097659/GO:0009892/GO:2000351/GO:0009653/GO:0006351/GO:0006366/GO:0003674/GO:0044237/GO:0004674/GO:0070885/GO:0071310/GO:2000026/GO:…	IMP/ISO/IDA/IBA/IEA/IPI	BP/CC/MF	PF00069	Mapk7	Q5NCN8/Q9WVS8	path:mmu04722/path:mmu04010/path:mmu04540/path:mmu04921/path:mmu05206/path:mmu04657/path:mmu04912/path:mmu05418	mmu:23939	ko:K04464	Neurotrophin signaling pathway - Mus musculus (house mouse)/MAPK signaling pathway - Mus musculus (house mouse)/Gap junction - Mus musculus (house mouse)/Oxytocin signaling pathway - Mus musculus (house mouse)/MicroRNAs in cancer - Mus musculus (house mouse)/IL-17 signaling pathway - Mus musculus (house mouse)/GnRH signaling pathway - Mus musculus (house mouse)/Fluid shear stress and atherosclero…
ENSMUSG00000001036	6.506155476	6.233715274	6.485202123	6.391836321	6.721289969	6.469357503	6.151578814	6.650235319	6.51016125	6.33902903	6.248389939	6.390038759	6.477273905	6.576911272	6.121248777	5.959354363	6.473298539	6.337858189	6.579398484	6.250675965	epsin 2	GO:0045747/GO:0045765/GO:0051049/GO:0070887/GO:0051234/GO:0071840/GO:0003674/GO:0071310/GO:0006996/GO:0001944/GO:0002040/GO:0043229/GO:0051179/GO:0043226/GO:0045334/GO:0035295/GO:0050789/GO:0050896/GO:0001568/GO:0050794/GO:0001525/GO:0048513/GO:0043227/GO:0048010/GO:0031410/GO:0031090/GO:0007154/GO:0043009/GO:0032879/GO:0007166/GO:0072358/GO:0051093/GO:0005575/GO:0005488/GO:0072359/GO:0006897/GO:…	ISO/IEA/IGI	BP/MF/CC	PF01417	Epn2	Q5NCM7/Q8CHU3/J3QNT7	path:mmu04144	mmu:13855	ko:K12471	Endocytosis - Mus musculus (house mouse)
ENSMUSG00000001039	5.077921286	5.729782222	5.16050859	5.306891759	5.139150385	5.162704242	5.054556107	5.110349518	4.813217527	5.048516613	5.295066303	5.546962286	5.110599673	5.537357714	4.981015291	4.762517709	5.354656501	5.295449867	5.083400106	5.101635399	B9 protein domain 1	GO:0023052/GO:0032502/GO:0030030/GO:0005886/GO:0005515/GO:0001944/GO:0030990/GO:0002065/GO:0005488/GO:0051234/GO:0006886/GO:0110165/GO:0005856/GO:0006810/GO:0097108/GO:0005814/GO:0035107/GO:0005929/GO:0003674/GO:0048856/GO:0006903/GO:0050896/GO:0071944/GO:0071840/GO:0050789/GO:0050794/GO:0098590/GO:0048880/GO:0005815/GO:0072358/GO:0044085/GO:0048598/GO:0043228/GO:0048731/GO:0001578/GO:0035082/GO:…	IMP/IEA/ISO/IDA/IPI	BP/CC/MF	PF07162	B9d1	Q9R1S0		mmu:27078	ko:K16744
ENSMUSG00000001052	5.56425557	5.485709065	5.476613448	5.34794422	5.631467498	5.454098909	5.457769045	5.533467403	5.621366658	5.553459957	5.35972851	5.354992874	5.655767216	5.111047079	5.193848029	4.962277621	5.376748869	5.524046947	5.517838872	5.401692584	Sec24 related gene family member B (S. cerevisiae)	GO:0090178/GO:0030855/GO:0016020/GO:0035295/GO:0048562/GO:0048568/GO:0002064/GO:0090596/GO:0060982/GO:0033043/GO:0003151/GO:0016043/GO:0050793/GO:0012507/GO:0090177/GO:0090175/GO:0035148/GO:0048839/GO:0043169/GO:0031090/GO:0035239/GO:0061024/GO:0048598/GO:0050789/GO:0030902/GO:0097708/GO:0060977/GO:0014020/GO:0048844/GO:0002009/GO:0002066/GO:0009653/GO:0098588/GO:0001738/GO:0032879/GO:0048667/GO:…	IMP/IGI/ISO/IDA/IPI	BP/CC/MF	PF04810/PF08033/PF04815/PF00626/PF04811	Sec24b	Q80ZX0	path:mmu04141	mmu:99683	ko:K14007	Protein processing in endoplasmic reticulum - Mus musculus (house mouse)
ENSMUSG00000001053	4.131310239	3.88890423	3.987373183	3.889421403	4.17015628	4.260789243	4.324654122	4.043632257	3.829352841	4.392419289	4.112454047	3.972205014	4.232400046	3.676320916	3.906349326	4.120136626	3.785357758	4.300971894	4.190050658	4.279040725	NEDD4 binding protein 3	GO:0008150/GO:0031410/GO:0048856/GO:0031982/GO:0110165/GO:0097708/GO:0043229/GO:0032501/GO:0032502/GO:0007275/GO:0005622/GO:0042995/GO:0005737/GO:0043226/GO:0048731/GO:0007399/GO:0005488/GO:0005515/GO:0005575/GO:0003674/GO:0043227	IEA/IBA/IDA/IPI/ND	BP/CC/MF		N4bp3	Q8C7U1		mmu:212706
ENSMUSG00000001054	5.428124775	5.348519617	5.457157985	5.701389226	5.753597988	5.502184328	5.799275233	5.657800573	5.27553712	5.272087927	5.25959374	5.244176388	5.616024389	5.710294107	5.677043726	6.02181865	5.683529168	5.910735775	5.827611957	5.62325318	required for meiotic nuclear division 5 homolog B	GO:0043170/GO:0004842/GO:0110165/GO:0043167/GO:0034657/GO:0043226/GO:0003824/GO:0043169/GO:0032991/GO:0043161/GO:0006511/GO:0005488/GO:0005737/GO:0009056/GO:0006807/GO:0003674/GO:0005575/GO:0016740/GO:0009057/GO:0005622/GO:0008152/GO:0030163/GO:0043229/GO:0019941/GO:0043227/GO:0140096/GO:0044238/GO:0005829/GO:0005634/GO:0019538/GO:1901565/GO:0019787/GO:0044260/GO:0043632/GO:0044257/GO:0010498/GO:…	IBA/IEA/ISO	BP/MF/CC	PF10607	Rmnd5b	Q91YQ7		mmu:66089	ko:K23333
ENSMUSG00000001056	6.636999199	6.716021368	6.583611371	6.769250015	6.751138928	6.193349775	6.563951204	6.46127177	6.370786999	6.37493239	6.66370853	6.648036118	6.567747048	7.029320402	6.601671072	6.372468697	6.713211434	6.761985824	6.950210321	6.650255716	NHP2 ribonucleoprotein	GO:0044237/GO:0044085/GO:1901576/GO:1901363/GO:0034641/GO:0043412/GO:0044238/GO:0031974/GO:0110165/GO:0034622/GO:0005488/GO:0019438/GO:0072588/GO:0008150/GO:0043933/GO:0031981/GO:0005730/GO:1901362/GO:0034645/GO:0001522/GO:0016070/GO:0043233/GO:0043231/GO:0003676/GO:0005732/GO:0005575/GO:0007004/GO:0046483/GO:0034660/GO:0044271/GO:0016043/GO:0016072/GO:0032991/GO:0065004/GO:0034470/GO:0070013/GO:…	ISO/IBA/IEA/IPI	BP/MF/CC	PF01248	Nhp2	Q9CRB2	path:mmu03008	mmu:52530	ko:K11129	Ribosome biogenesis in eukaryotes - Mus musculus (house mouse)
ENSMUSG00000001062	5.126151628	4.560502186	4.931434977	4.778742496	5.231672958	4.865781764	5.256886542	5.162270115	5.205024356	4.796278613	4.98361311	4.625083008	5.248904428	5.018320207	5.037334888	4.915703809	4.58024205	4.736589134	4.970526219	4.460570506	VPS9 domain containing 1	GO:0008150/GO:0003674	ND	BP/MF	PF02204	Vps9d1	Q8C190/Q3U280		mmu:72325
ENSMUSG00000001065	3.924249105	3.692860447	3.570770013	3.891809682	3.633951927	3.937128365	3.653631261	3.657942877	3.699551978	3.449944484	3.855288795	3.546711697	3.522839198	3.374015906	3.946506778	3.536753809	3.4463275	3.627897125	3.72678635	3.402742791	zinc finger protein (C2H2 type) 276	GO:0005694/GO:0003674/GO:0005575/GO:0008270/GO:0110165/GO:0098687/GO:1901363/GO:0005634/GO:0005622/GO:0099080/GO:0097159/GO:0005488/GO:0003677/GO:0000776/GO:0046872/GO:0003676/GO:0043229/GO:0000775/GO:0043228/GO:0043169/GO:0043231/GO:0043232/GO:0043227/GO:0046914/GO:0043167/GO:0043226	ISO/IEA	CC/MF	PF00096/PF07776	Zfp276	Q8CE64		mmu:57247
ENSMUSG00000001082	3.679224379	3.969780832	4.177698993	4.413357765	3.722683027	3.845317106	3.842543701	4.110909378	3.776964322	3.906270158	4.076494795	4.255815948	3.888200277	4.356319884	4.398225247	3.884867141	4.173879444	4.0319909	3.904136971	4.508561295	major facilitator superfamily domain containing 10	GO:0022857/GO:0098590/GO:0005575/GO:0003674/GO:0098858/GO:0012506/GO:0005622/GO:0097708/GO:0016020/GO:0043228/GO:0015629/GO:0015711/GO:0005903/GO:0005215/GO:0006810/GO:0016021/GO:0120025/GO:0005886/GO:0043232/GO:0005902/GO:0110165/GO:0005884/GO:0071944/GO:0043229/GO:0015075/GO:0099512/GO:0008150/GO:0008514/GO:0099081/GO:0031410/GO:0099513/GO:0012501/GO:0098862/GO:0008219/GO:0006811/GO:0005737/GO:…	ISO/IBA/IEA/IDA	MF/CC/BP	PF07690	Mfsd10	Q9D2V8		mmu:68294
ENSMUSG00000001089	6.866513977	6.912847185	6.701835287	6.723777756	7.238360251	7.066283995	7.041800251	6.936198134	7.091283781	7.038698012	6.57728538	6.508966506	7.316771028	6.351546171	7.35931154	7.424355653	6.46577826	6.443745511	7.542914649	6.713294641	leucine zipper protein 1	GO:0003281/GO:0003279/GO:0048646/GO:0032502/GO:0003205/GO:0048729/GO:0003231/GO:0072175/GO:0005575/GO:0016331/GO:0005634/GO:0021503/GO:0001944/GO:0048731/GO:0014020/GO:0009792/GO:0048856/GO:0032501/GO:0021915/GO:0035148/GO:0002009/GO:0009888/GO:0007399/GO:0009653/GO:0009790/GO:0001841/GO:0003674/GO:0110165/GO:0005622/GO:0060562/GO:0001568/GO:0035295/GO:0060429/GO:0048513/GO:0043226/GO:0043227/GO:…	IMP/IBA/IDA/ND	BP/CC/MF		Luzp1	Q8R4U7		mmu:269593	ko:K25831
ENSMUSG00000001098	6.497860854	7.170793795	6.763412042	6.696339592	6.940884706	6.848727485	6.865950829	6.941947999	6.523875561	6.705562118	6.663408414	6.851184635	6.994497644	6.789882982	7.137958431	6.804234732	6.964201254	6.88407851	6.777773718	7.173940964	potassium channel tetramerisation domain containing 10	GO:0009057/GO:0009056/GO:0009966/GO:0005575/GO:0044265/GO:0005737/GO:0044267/GO:0044248/GO:0050896/GO:0005654/GO:0005622/GO:0005634/GO:0044260/GO:0045746/GO:0009987/GO:0008152/GO:0051056/GO:0008593/GO:0007265/GO:0050794/GO:0044257/GO:0031267/GO:0044238/GO:0120025/GO:0048856/GO:0005515/GO:0051020/GO:0030990/GO:0009653/GO:0007507/GO:0050789/GO:0110165/GO:0007266/GO:1901575/GO:0046578/GO:0031981/GO:…	ISO/IBA/IDA/IMP/IEA/TAS/IPI	BP/CC/MF	PF02214	Kctd10	Q922M3/F8WGQ9		mmu:330171	ko:K15074
ENSMUSG00000001100	6.864830572	7.103606773	6.836318708	6.966763791	7.091095071	6.638021521	7.059438088	6.733303704	6.983192951	6.854640857	6.834194909	6.766802518	7.054350314	6.863105982	6.963212617	6.64644884	6.881380671	6.736683501	7.105427308	6.88270211	polymerase (DNA-directed) delta interacting protein 2	GO:0005575/GO:0043227/GO:0048285/GO:0007346/GO:0048519/GO:0005622/GO:0008150/GO:0045787/GO:0000278/GO:0007049/GO:0009895/GO:0045931/GO:1903047/GO:0000280/GO:0043231/GO:0044248/GO:0003674/GO:0048518/GO:0009987/GO:0010506/GO:0008152/GO:0043233/GO:0009892/GO:1901363/GO:0060090/GO:0031323/GO:0003676/GO:0043228/GO:0016242/GO:0009894/GO:0032989/GO:0031324/GO:0043232/GO:0007005/GO:0005488/GO:0051726/GO:…	ISO/IEA/IMP/HDA/IDA	CC/BP/MF	PF04379/PF08755	Poldip2	Q91VA6		mmu:67811	ko:K17809
ENSMUSG00000001105	7.082307878	7.149469182	7.263524778	7.492844572	6.813436384	6.95389035	7.176866142	7.112078897	7.119948295	7.187432743	7.285883085	7.283198493	7.001688387	7.281733459	7.16511596	6.695029195	7.077197745	7.240660861	7.337039301	7.198341644	intraflagellar transport 20	GO:0043005/GO:0042995/GO:0070925/GO:0010970/GO:0010646/GO:0010640/GO:0015629/GO:0015630/GO:0070727/GO:0006810/GO:0006886/GO:0043226/GO:0005622/GO:0015031/GO:0042490/GO:0010506/GO:0014706/GO:0042886/GO:0030030/GO:0005575/GO:0045184/GO:0007507/GO:0022607/GO:0043170/GO:0005929/GO:0051234/GO:0007283/GO:0065007/GO:0071702/GO:0044782/GO:0007399/GO:0006807/GO:0042692/GO:0009987/GO:0007169/GO:0012505/GO:…	IDA/IEA/IMP/IBA/ISO/IC/IPI	CC/BP/MF	PF14931	Ift20	Q61025		mmu:55978	ko:K16473
ENSMUSG00000001119	1.271548659	1.270622682	1.245554475	1.052173408	1.145145744	1.039257581	1.190069707	1.107833205	1.162878843	1.057574268	1.192166143	1.143794389	1.062850379	1.332597719	1.047063589	1.058416855	1.437715104	1.429227955	1.076292428	1.446481444	collagen type VI alpha 1	GO:1901699/GO:0110165/GO:0051259/GO:0051291/GO:0031012/GO:1901698/GO:0032501/GO:0003417/GO:0019838/GO:0051216/GO:0005575/GO:0016043/GO:0003418/GO:0048468/GO:1901701/GO:0048513/GO:0010033/GO:0022607/GO:0030154/GO:0090171/GO:0010243/GO:1901700/GO:0001501/GO:0050896/GO:0030020/GO:0009987/GO:0003416/GO:0048407/GO:0003422/GO:0044085/GO:0051716/GO:0022610/GO:0060350/GO:0060348/GO:0016020/GO:0048869/GO:…	IDA/IBA/ISO/HDA/RCA/IEA	BP/CC/MF	PF01391/PF00092	Col6a1	B0LAD9/Q04857	path:mmu04512/path:mmu04151/path:mmu05165/path:mmu04510/path:mmu04974	mmu:12833	ko:K06238	ECM-receptor interaction - Mus musculus (house mouse)/PI3K-Akt signaling pathway - Mus musculus (house mouse)/Human papillomavirus infection - Mus musculus (house mouse)/Focal adhesion - Mus musculus (house mouse)/Protein digestion and absorption - Mus musculus (house mouse)
ENSMUSG00000001120	6.464447081	6.291722127	6.064943314	6.283943932	6.543928904	6.43416897	6.271178302	6.217242381	6.477897783	6.813106391	6.15069296	6.020874157	6.461111477	6.165399861	6.996838584	6.766103847	6.363911264	5.818777723	6.772746181	6.354744405	poly(rC) binding protein 3	GO:0006351/GO:0008150/GO:0006355/GO:0009889/GO:0006807/GO:0006366/GO:0006725/GO:0044238/GO:1990837/GO:0031326/GO:0009059/GO:0034645/GO:0034654/GO:0001217/GO:1903507/GO:0006357/GO:0044271/GO:0045892/GO:0043170/GO:0034641/GO:1903506/GO:1901362/GO:2001141/GO:0031323/GO:1901360/GO:0044249/GO:1902679/GO:0140110/GO:0001012/GO:1901576/GO:0048523/GO:0046483/GO:0001227/GO:0000977/GO:0097659/GO:0016070/GO:…	IDA/IEA	BP/MF/CC	PF00013	Pcbp3	P57722		mmu:59093	ko:K21444
ENSMUSG00000001123	5.131608885	5.660082461	5.537124921	5.657759242	4.95930423	5.317013257	5.677175701	5.643658017	4.97512521	5.064708582	5.833363983	5.613769331	5.345622613	5.807547497	5.67975207	5.291559843	6.09918193	5.816011653	4.759710147	5.746204788	lectin galactose binding soluble 9	GO:1903531/GO:1904951/GO:0010605/GO:0090174/GO:0031325/GO:0051239/GO:0031341/GO:0031401/GO:0031348/GO:0008152/GO:0098542/GO:0097367/GO:0098586/GO:0050863/GO:0001934/GO:0090087/GO:0098609/GO:0032101/GO:1903530/GO:0090100/GO:0090092/GO:0032675/GO:0031399/GO:0099500/GO:0050789/GO:0045088/GO:0045184/GO:0032689/GO:0046634/GO:0031347/GO:0050794/GO:0044093/GO:0008150/GO:1903038/GO:0031349/GO:0001911/GO:…	IMP/IBA/ISA/IDA/ISO/HDA/IEA/IPI	BP/MF/CC	PF00337	Lgals9	O08573/G3X9T7		mmu:16859	ko:K10093
ENSMUSG00000001127	7.949997031	7.681343327	7.860133514	7.628477348	7.548616918	7.598206576	7.851742792	7.757197714	7.959130447	7.925000013	7.616195473	7.597148456	7.900531829	7.599544513	7.943629698	7.503929914	7.513919847	7.655762369	7.511377179	7.687496595	Araf proto-oncogene serine/threonine kinase	GO:0004674/GO:0036211/GO:0008150/GO:0004707/GO:1902531/GO:0042325/GO:0048583/GO:0042176/GO:0008144/GO:0005622/GO:0048523/GO:0007165/GO:0016772/GO:1901575/GO:0051174/GO:0051173/GO:0042327/GO:0048522/GO:0023051/GO:0004708/GO:0023052/GO:0050789/GO:0046872/GO:0048519/GO:1901565/GO:0023014/GO:0004672/GO:0019538/GO:0043226/GO:0051246/GO:0060548/GO:0043170/GO:0019941/GO:0008152/GO:1903050/GO:0043169/GO:…	ISO/IBA/IEA/IDA/IPI	MF/BP/CC	PF07714/PF02196/PF00130	Araf	P04627/Q8CAD1	path:mmu04730/path:mmu05220/path:mmu05225/path:mmu05226/path:mmu04928/path:mmu05160/path:mmu05215/path:mmu04720/path:mmu04810/path:mmu01522/path:mmu05208/path:mmu04650/path:mmu04012/path:mmu04910/path:mmu01521/path:mmu05022/path:mmu05214/path:mmu04068/path:mmu05010/path:mmu05213/path:mmu04010/path:mmu05223/path:mmu04914/path:mmu05221/path:mmu05212/path:mmu05219/path:mmu05205/path:mmu05034/path:mm…	mmu:11836	ko:K08845	Long-term depression - Mus musculus (house mouse)/Chronic myeloid leukemia - Mus musculus (house mouse)/Hepatocellular carcinoma - Mus musculus (house mouse)/Gastric cancer - Mus musculus (house mouse)/Parathyroid hormone synthesis secretion and action - Mus musculus (house mouse)/Hepatitis C - Mus musculus (house mouse)/Prostate cancer - Mus musculus (house mouse)/Long-term potentiation - Mus mu…
ENSMUSG00000001128	0.033048332	0.255047928	0.160205454	0.131992707	-0.089259736	0.031441885	-0.107732526	-0.074238271	-0.093035132	0.19784539	-0.011549705	-0.063938564	-0.06333922	0.098792196	-0.022781619	-0.01403408	0.149460218	-0.065249174	-0.058526181	0.120857208	complement factor properdin	GO:0005615/GO:0002684/GO:0071704/GO:0002252/GO:0006952/GO:0006807/GO:0006950/GO:0051707/GO:0002376/GO:0031410/GO:0002253/GO:0050896/GO:0005773/GO:0098542/GO:0006955/GO:0044238/GO:0009605/GO:0005576/GO:0005737/GO:0097708/GO:0009607/GO:0099503/GO:0005622/GO:0005575/GO:0008150/GO:0002682/GO:0012505/GO:0050778/GO:0110165/GO:0043170/GO:0050789/GO:0050776/GO:0043207/GO:0006959/GO:0005886/GO:0072376/GO:…	IDA/IMP/IEA	CC/BP	PF00090	Cfp	A2AE15/P11680	path:mmu05168	mmu:18636	ko:K15412	Herpes simplex virus 1 infection - Mus musculus (house mouse)
ENSMUSG00000001131	3.326488309	5.612728484	5.382083544	5.961980114	3.232252324	3.58127171	3.207019557	4.513339879	2.852721801	3.197799485	5.880246773	5.492287201	3.302718524	5.800314421	3.670114148	3.628302631	5.926981547	5.796258612	3.277355164	5.886717877	tissue inhibitor of metalloproteinase 1	GO:0110165/GO:0052547/GO:0005576/GO:0008219/GO:0051271/GO:0051336/GO:0008152/GO:0098772/GO:0008191/GO:0008237/GO:0051674/GO:0032268/GO:0005575/GO:0080090/GO:0051172/GO:0051346/GO:0008233/GO:0044092/GO:0031329/GO:0031330/GO:0051239/GO:0043900/GO:0043170/GO:0051179/GO:0008270/GO:0046914/GO:0031324/GO:0043167/GO:0090594/GO:0043169/GO:0010605/GO:0051270/GO:0070011/GO:0051241/GO:0097709/GO:0010951/GO:…	HDA/IBA/ISO/IEA/IDA	CC/BP/MF	PF00965	Timp1	P12032	path:mmu04066	mmu:21857	ko:K16451	HIF-1 signaling pathway - Mus musculus (house mouse)
ENSMUSG00000001134	3.723340057	4.431723638	3.825353165	3.533960455	4.131867499	3.736821734	3.948631963	3.905892507	3.883497223	3.870167083	4.082826249	4.152719869	3.897125502	4.554678002	3.849779722	3.643311463	4.461038697	3.97390669	3.644442879	4.138276564	ubiquitously expressed prefoldin like chaperone	GO:0009987/GO:0005737/GO:0050794/GO:0051171/GO:0050789/GO:0009059/GO:0010467/GO:0005515/GO:0019219/GO:0048519/GO:0005488/GO:0008152/GO:1901362/GO:0008150/GO:0048523/GO:0044260/GO:0009890/GO:0048487/GO:0005575/GO:0015631/GO:0006915/GO:0005813/GO:0051253/GO:0003714/GO:0008092/GO:0007098/GO:0005634/GO:0045892/GO:0043232/GO:0043231/GO:0000785/GO:0043229/GO:0051172/GO:0008219/GO:0044271/GO:0016070/GO:…	ISS/ISO/IBA/IEA	BP/CC/MF	PF02996	Uxt	Q9WTZ0		mmu:22294
ENSMUSG00000001138	2.138576315	2.082715038	1.837712869	2.22232837	1.880627184	1.896694312	2.002684498	2.067359181	2.049721795	2.210519565	2.044564836	2.273258866	1.860068408	2.218498141	2.154967804	1.956580584	2.081402558	2.137253418	1.967318396	2.016213179	cyclin M3	GO:0005575/GO:0003674/GO:0006810/GO:0110165/GO:0008150/GO:0022857/GO:0005886/GO:0005215/GO:0006811/GO:0016020/GO:0051234/GO:0031224/GO:0051179/GO:0016021/GO:0071944	IBA/IEA	CC/MF/BP	PF00571	Cnnm3	Q32NY4		mmu:94218	ko:K16302
ENSMUSG00000001143	5.016580819	4.991656089	5.171364755	5.398667903	5.118614278	5.260314011	5.385825797	5.302352026	5.368784506	4.588307296	5.227954572	5.02773516	5.158799272	5.082423664	5.037090637	5.286895943	5.207261701	5.177060566	5.083235013	5.130558275	lectin mannose-binding 2-like	GO:0043227/GO:0012505/GO:0010256/GO:0071705/GO:0015031/GO:0005773/GO:0005488/GO:0005789/GO:0048029/GO:0008104/GO:0008150/GO:0043226/GO:0051179/GO:0005575/GO:0031982/GO:0005737/GO:0031410/GO:0043231/GO:0045184/GO:0036094/GO:0043229/GO:0043167/GO:0046907/GO:0031090/GO:0005622/GO:0016020/GO:0051234/GO:0005886/GO:0030135/GO:0030246/GO:0046872/GO:0015833/GO:0007029/GO:0006888/GO:0006810/GO:0005794/GO:…	ISO/IEA/IBA	CC/BP/MF	PF03388	Lman2l	D3Z4P2/P59481		mmu:214895	ko:K10083
ENSMUSG00000001150	5.049925327	5.194334991	5.076044265	5.00459838	4.765376395	4.825913929	4.876817836	5.072135515	4.858702987	4.907035308	4.708985628	4.455654641	5.161844559	4.990569933	4.817207192	4.966398766	4.958855678	4.830064746	5.149386012	5.036036906	minichromosome maintenance complex component 3 associated protein	GO:0043229/GO:0009987/GO:0031503/GO:0071702/GO:0006810/GO:0031965/GO:0006611/GO:0071705/GO:0051168/GO:0005622/GO:0010484/GO:0006325/GO:0071704/GO:0008152/GO:0003682/GO:0051169/GO:0010467/GO:0003824/GO:0043933/GO:0004402/GO:0006403/GO:0051234/GO:0071840/GO:0032991/GO:0043231/GO:0071166/GO:0015031/GO:0043228/GO:0005488/GO:0015833/GO:0006405/GO:0003676/GO:0043232/GO:0003674/GO:0016973/GO:0032502/GO:…	IBA/ISO/IEA/IDA	CC/BP/MF	PF03399/PF16768/PF16769/PF16766	Mcm3ap	Q9WUU9		mmu:54387	ko:K24317
ENSMUSG00000001151	4.193709245	4.179611552	4.320222048	3.703446621	4.354073959	4.423469964	4.352674973	4.368286766	4.447141033	4.320796499	3.973068552	4.25096394	4.273678781	4.218867992	4.274560053	4.286439623	4.064027242	4.149016729	4.222101072	4.496432765	pericentrin (kendrin)	GO:0070727/GO:0022402/GO:0032991/GO:0015031/GO:0007010/GO:0048513/GO:0005575/GO:0051179/GO:0005794/GO:0043232/GO:0022037/GO:0033365/GO:0021988/GO:0005737/GO:0009987/GO:0005814/GO:0034613/GO:0044085/GO:0007399/GO:0044782/GO:0015630/GO:0000280/GO:0035050/GO:0048193/GO:0045171/GO:0045184/GO:0001655/GO:0007417/GO:0021575/GO:0012505/GO:0065007/GO:0048199/GO:0099512/GO:0046907/GO:0001654/GO:0021696/GO:…	ISO/IDA/IMP/IEA/IPI	BP/CC/MF	PF10495	Pcnt	Q3TQR8/Q8CDL2/A0A1W2P737/P48725/Q80U10/F8VPV0		mmu:18541	ko:K16481
ENSMUSG00000001156	3.893342657	4.192526423	3.919931094	3.663059666	4.1118433	3.844883965	3.790367746	3.973258063	3.95987412	3.617144584	3.705338337	3.746810113	4.251055057	3.709426883	4.329783398	4.861490333	3.495747598	3.731072371	3.796000655	4.260508829	MAX dimerization protein 1	GO:0010605/GO:0000981/GO:1901363/GO:0001227/GO:0009890/GO:0000978/GO:1901360/GO:0010558/GO:0003674/GO:1902679/GO:0001217/GO:1903507/GO:1903506/GO:1990837/GO:0097159/GO:0000976/GO:0051172/GO:0000977/GO:2000112/GO:0016070/GO:2001141/GO:0110165/GO:0003676/GO:0043229/GO:0000987/GO:1901576/GO:2000113/GO:0010467/GO:0080090/GO:0051253/GO:0070013/GO:0043170/GO:0009889/GO:0140110/GO:0010629/GO:0043227/GO:…	ISO/IEA/IPI	BP/MF/CC	PF00010	Mxd1	Q8K1Z8		mmu:17119	ko:K09114
ENSMUSG00000001157	3.40071868	3.204726103	3.68926968	3.259006024	3.402947971	3.103760856	3.279888212	3.559149476	3.856370398	3.162333268	3.296142915	3.468400627	3.446616121	2.977927045	3.399991945	3.541225519	3.835187277	3.087016452	3.500705672	3.112826825	germ cell-less spermatogenesis associated 1	GO:0000003/GO:0006355/GO:0043170/GO:0050794/GO:0048856/GO:0032774/GO:0005737/GO:0007275/GO:0034399/GO:0034641/GO:0050789/GO:0060255/GO:0008150/GO:0034654/GO:0043226/GO:0009059/GO:0071704/GO:0043227/GO:0005886/GO:0009987/GO:0006139/GO:0051704/GO:0070013/GO:0048869/GO:2001141/GO:0065007/GO:0006807/GO:0031967/GO:0051252/GO:0005773/GO:1901360/GO:0031974/GO:0031975/GO:0007276/GO:0034645/GO:0048609/GO:…	TAS/IDA/IEA/IPI	BP/CC/MF	PF07707/PF00651	Gmcl1	Q920G9		mmu:23885	ko:K10485
ENSMUSG00000001158	6.725733865	7.366458324	6.909087575	7.013536975	6.662780894	6.671482375	6.606195849	6.829387179	6.612027404	6.662223524	6.838121235	7.041957864	6.495920879	6.907761229	6.958079265	6.468915267	6.998856783	7.088989575	6.850074932	6.794419063	small nuclear ribonucleoprotein 27 (U4/U6.U5)	GO:0110165/GO:0003674/GO:0006139/GO:0043231/GO:0043170/GO:0043226/GO:0006725/GO:0008150/GO:0008152/GO:0016071/GO:0009987/GO:0071704/GO:0010467/GO:0008380/GO:0044237/GO:0043229/GO:0016070/GO:1901360/GO:0090304/GO:0005575/GO:0034641/GO:0044238/GO:0005634/GO:0005622/GO:0043227/GO:0006396/GO:0006397/GO:0046483/GO:0006807	IEA/ND	CC/MF/BP	PF08648	Snrnp27	Q8K194	path:mmu03040	mmu:66618	ko:K12846	Spliceosome - Mus musculus (house mouse)
ENSMUSG00000001166	2.217390981	2.500510545	2.377497881	2.450002913	2.570238366	2.439987206	2.592921808	2.258418365	2.294523326	2.447504988	1.905459516	2.302358904	2.179428599	2.259599224	2.66673057	2.515971294	2.379764429	2.485369805	2.891581682	2.164215557	2'-5' oligoadenylate synthetase 1C	GO:0031981/GO:0031974/GO:0019222/GO:0031323/GO:0050792/GO:0043903/GO:0032069/GO:0030554/GO:0032559/GO:0005488/GO:0043167/GO:0032555/GO:0032553/GO:0006725/GO:0003676/GO:0006807/GO:0050794/GO:1901363/GO:0043170/GO:0097159/GO:0050896/GO:0043229/GO:0003824/GO:0051336/GO:0034641/GO:0051171/GO:0043226/GO:0036094/GO:0048519/GO:0044237/GO:0005524/GO:1903900/GO:0003723/GO:0008152/GO:0019219/GO:0060255/GO:…	IBA/IEA/IDA	CC/BP/MF	PF10421	Oas1c	Q924S2		mmu:114643
ENSMUSG00000001173	2.40952525	2.199373829	2.723935433	2.510184476	2.139964225	2.58425069	2.49054772	2.26136641	2.729182927	2.56682191	2.857920124	2.235245423	2.392804737	2.391193212	2.481241575	2.178333569	2.307633606	2.227497969	2.740372348	2.16709536	OCRL inositol polyphosphate-5-phosphatase	GO:0032991/GO:0016787/GO:0052866/GO:0052745/GO:0005488/GO:0005575/GO:0016462/GO:0005622/GO:0120031/GO:0031982/GO:0051716/GO:0120025/GO:0005515/GO:0032501/GO:0051656/GO:0008104/GO:0071704/GO:0110165/GO:0006810/GO:0032502/GO:0071702/GO:0008150/GO:0046486/GO:0008047/GO:0016311/GO:0016192/GO:0017016/GO:0031984/GO:0046488/GO:0006796/GO:0044237/GO:0005634/GO:0035735/GO:0034613/GO:0012505/GO:0031410/GO:…	IEA/ISO/IBA/IDA/IGI/ISS	CC/MF/BP	PF03372/PF16726/PF00620	Ocrl	Q6NVF0	path:mmu04070/path:mmu00562/path:mmu01100	mmu:320634	ko:K01099	Phosphatidylinositol signaling system - Mus musculus (house mouse)/Inositol phosphate metabolism - Mus musculus (house mouse)/Metabolic pathways - Mus musculus (house mouse)
ENSMUSG00000001175	11.40156982	11.04526709	11.33164367	10.71374557	11.31678139	11.55205179	11.34182166	11.09715771	11.56271726	11.22220467	11.16681342	11.0767943	11.29004906	10.77391523	11.36484922	11.44004999	11.07153558	10.69028403	11.5078477	10.95306981	calmodulin 1	GO:0005737/GO:0005515/GO:0005634/GO:0005886/GO:0005575/GO:0005887/GO:0110165/GO:0005739/GO:0003674/GO:0016705/GO:0001664/GO:0051098/GO:0098796/GO:0008179/GO:0044772/GO:0044839/GO:0005488/GO:0016709/GO:0005773/GO:0065007/GO:0012506/GO:0008076/GO:0003824/GO:0030235/GO:0005102/GO:0016020/GO:0098590/GO:0070382/GO:0030054/GO:0047485/GO:0030133/GO:0030234/GO:0098793/GO:0097708/GO:0120025/GO:0043227/GO:…	ISO/IGI/IDA/TAS	CC/MF/BP	PF13499	Calm1	P0DP27/P0DP26/P0DP28/Q3UKW2	path:mmu04713/path:mmu04921/path:mmu04014/path:mmu04022/path:mmu05010/path:mmu05200/path:mmu04261/path:mmu04625/path:mmu04971/path:mmu05214/path:mmu05012/path:mmu05133/path:mmu05152/path:mmu04744/path:mmu04720/path:mmu04270/path:mmu05417/path:mmu04015/path:mmu05163/path:mmu04912/path:mmu05170/path:mmu04371/path:mmu04922/path:mmu05167/path:mmu05031/path:mmu05034/path:mmu04915/path:mmu04020/path:mm…	mmu:12313/mmu:12315/mmu:12314	ko:K02183	Circadian entrainment - Mus musculus (house mouse)/Oxytocin signaling pathway - Mus musculus (house mouse)/Ras signaling pathway - Mus musculus (house mouse)/cGMP-PKG signaling pathway - Mus musculus (house mouse)/Alzheimer disease - Mus musculus (house mouse)/Pathways in cancer - Mus musculus (house mouse)/Adrenergic signaling in cardiomyocytes - Mus musculus (house mouse)/C-type lectin receptor…
ENSMUSG00000001211	8.430976214	8.224591932	8.214290901	8.494134355	8.407651496	8.361568686	8.380955708	8.325196592	8.472458829	8.545585175	8.384065026	8.274274839	8.346561016	8.231612785	8.299174335	8.389260536	8.269234493	8.336672334	8.633106861	8.39497832	1-acylglycerol-3-phosphate O-acyltransferase 3	GO:0003674/GO:0019637/GO:0042171/GO:0005783/GO:0031967/GO:0031224/GO:0006793/GO:0008374/GO:0031090/GO:0003841/GO:0043231/GO:0031975/GO:0005737/GO:0008150/GO:0005773/GO:0071944/GO:0009987/GO:0016740/GO:0071704/GO:0071617/GO:0005886/GO:0005789/GO:0016411/GO:0043227/GO:0043226/GO:0008654/GO:0044237/GO:0016747/GO:0009058/GO:0016020/GO:0008610/GO:0008152/GO:0006644/GO:0006796/GO:0016746/GO:0043229/GO:…	IDA/IEA/ISO/IBA	MF/BP/CC	PF01553/PF16076	Agpat3	Q9D517	path:mmu00564/path:mmu04072/path:mmu00561/path:mmu01100	mmu:28169	ko:K13523	Glycerophospholipid metabolism - Mus musculus (house mouse)/Phospholipase D signaling pathway - Mus musculus (house mouse)/Glycerolipid metabolism - Mus musculus (house mouse)/Metabolic pathways - Mus musculus (house mouse)
ENSMUSG00000001227	5.854937295	6.401838757	5.859818643	6.282735323	6.458406612	6.191226128	6.097249908	6.180562216	5.821704586	6.027209728	5.660735065	6.12951139	6.498726134	5.871468935	6.36389263	6.419584529	6.142450908	6.102420376	6.328307987	6.024614464	sema domain transmembrane domain (TM) and cytoplasmic domain (semaphorin) 6B	GO:0003674/GO:0005488/GO:0001667/GO:0000902/GO:0050794/GO:0005102/GO:0006935/GO:0048863/GO:0050919/GO:1902284/GO:0050770/GO:0048864/GO:0120039/GO:0048869/GO:0031344/GO:0051128/GO:0005887/GO:0051129/GO:0048583/GO:0045596/GO:0016049/GO:0120036/GO:0007399/GO:0050771/GO:0005886/GO:0050789/GO:0050767/GO:0031345/GO:2000026/GO:0007275/GO:0005576/GO:0007166/GO:0048699/GO:0030545/GO:0071944/GO:0048731/GO:…	IPI/IBA/IEA	MF/BP/CC	PF01403	Sema6b	Q3UTK5/O54951	path:mmu04360	mmu:20359	ko:K06842	Axon guidance - Mus musculus (house mouse)
ENSMUSG00000001228	-0.002867088	0.130805767	0.210892806	0.368911518	0.109447819	0.043189979	-0.010926134	0.124832131	-0.016281771	0.195403354	-0.003420598	0.11444402	0.111858212	0.183482442	0.060223948	0.317459944	0.410942802	0.02020375	0.022961911	0.205738153	ubiquitin-like containing PHD and RING finger domains 1	GO:0000791/GO:0051253/GO:0006464/GO:0016574/GO:0035064/GO:0060255/GO:0042393/GO:0019222/GO:0043229/GO:0071944/GO:0046483/GO:0043231/GO:0010467/GO:0051252/GO:0000792/GO:0006513/GO:0001067/GO:0006139/GO:0008152/GO:1901360/GO:0043228/GO:0003674/GO:0006725/GO:0009056/GO:0031327/GO:0043232/GO:0000790/GO:0043233/GO:0010629/GO:0004842/GO:0080090/GO:0051276/GO:0010390/GO:0008327/GO:0008283/GO:1901576/GO:…	ISO/IDA/IBA/IMP/TAS/IEA/IPI	CC/BP/MF	PF00628/PF12148/PF00240/PF02182	Uhrf1	Q8VDF2		mmu:18140	ko:K10638
ENSMUSG00000001229	7.198346692	6.890804111	6.968481974	6.831099936	7.535067061	7.041106049	7.139213242	7.018608838	7.196793439	7.287737086	6.619488396	6.893140387	6.902926814	6.827205581	6.910453049	7.46137577	6.730518031	6.95770089	7.57716077	7.057070552	dipeptidylpeptidase 9	GO:0019538/GO:0008233/GO:0016825/GO:0016787/GO:0004177/GO:0008236/GO:0005829/GO:0005737/GO:0008152/GO:0044238/GO:0110165/GO:0071704/GO:0008238/GO:0017171/GO:0042802/GO:0006508/GO:0070011/GO:0140096/GO:0005622/GO:0003674/GO:0005575/GO:0043170/GO:0005515/GO:0003824/GO:0006807/GO:0008150/GO:1901564/GO:0005488	IEA/ISO	BP/MF/CC	PF00326/PF00930	Dpp9	Q8BVG4		mmu:224897	ko:K08656
ENSMUSG00000001240	5.98263419	6.116746397	5.93633916	6.135985049	6.543372415	5.873850786	6.60163156	6.521327911	6.143617974	6.10227183	5.819758727	5.990538131	5.994087373	6.131212692	6.252740221	6.483326489	6.107687229	6.500471221	5.967616378	6.073760676	receptor (calcitonin) activity modifying protein 2	GO:0033036/GO:0048519/GO:0007043/GO:0032991/GO:0048518/GO:0071363/GO:0048646/GO:0003008/GO:0072359/GO:0003013/GO:1990410/GO:0050794/GO:0048856/GO:0009719/GO:0016043/GO:0032870/GO:0019222/GO:0001944/GO:0071310/GO:0071705/GO:0050896/GO:0004888/GO:0032502/GO:0019933/GO:0016192/GO:0017046/GO:0048731/GO:0071495/GO:0016050/GO:1904036/GO:0009893/GO:0009966/GO:0051179/GO:0097084/GO:0005623/GO:0032501/GO:…	ISO/IMP/IBA/IEA/IPI/IDA	BP/CC/MF	PF04901	Ramp2	Q9WUP0	path:mmu04270	mmu:54409	ko:K08448	Vascular smooth muscle contraction - Mus musculus (house mouse)
ENSMUSG00000001247	4.300464037	4.342487623	4.213674672	4.351619895	4.513881243	4.253568371	4.789034625	4.373683971	4.400907575	4.426750047	4.47915576	4.803871968	4.274032166	4.356636339	4.299170457	3.981599149	4.252184699	4.47317917	4.564815355	4.54940267	lipolysis stimulated lipoprotein receptor	GO:0008104/GO:0044238/GO:0016021/GO:0071704/GO:0042953/GO:0009987/GO:0003674/GO:0045184/GO:0044872/GO:0071944/GO:0015833/GO:0006629/GO:0030154/GO:0034362/GO:0071814/GO:0008150/GO:0034330/GO:0044877/GO:0015031/GO:0034385/GO:0032994/GO:0001889/GO:0065007/GO:0008152/GO:0016020/GO:0071705/GO:0033036/GO:0019216/GO:0034361/GO:0034358/GO:0042627/GO:0042886/GO:0030228/GO:0061833/GO:0044085/GO:1904274/GO:…	IDA/ISO/IEA/TAS/IMP/IPI	BP/CC/MF	PF05624	Lsr	Q99KG5		mmu:54135
ENSMUSG00000001248	5.685190885	5.731067669	5.492304148	5.731153652	5.667597231	5.533316947	5.744855205	5.795007848	5.495987237	5.888709841	5.524716397	5.518423517	5.7992374	5.626647115	5.891013695	5.420280747	5.386636996	5.453739518	5.940952899	5.37375663	GRAM domain containing 1A	GO:0043229/GO:0005622/GO:0003674/GO:0043231/GO:0051716/GO:0016020/GO:0006869/GO:0071396/GO:0071407/GO:0070887/GO:0008150/GO:0015485/GO:0005773/GO:0071944/GO:0033036/GO:0097159/GO:0043226/GO:0005789/GO:0005737/GO:0070723/GO:0008289/GO:0032934/GO:0031234/GO:0005488/GO:0005886/GO:0009898/GO:0005575/GO:0043227/GO:0031300/GO:0005319/GO:0043178/GO:0071397/GO:0031227/GO:0005215/GO:0036094/GO:0071310/GO:…	ISO/IDA/IMP/IEA	CC/MF/BP	PF02893/PF16016	Gramd1a	Q8VEF1		mmu:52857
ENSMUSG00000001249	0.886734674	0.897047103	0.951240301	0.935039053	1.127109055	0.847028989	0.805896135	0.807163723	1.089555059	0.985203079	0.766869224	0.820412435	0.912547605	0.882335933	0.799444888	0.808799631	0.850311997	0.729487535	1.164988469	0.824144877	hepsin	GO:0009790/GO:0009887/GO:0048731/GO:0050678/GO:2000345/GO:0048568/GO:0048598/GO:0005267/GO:0006796/GO:0005575/GO:0022612/GO:0065009/GO:0006590/GO:0006575/GO:0036477/GO:2000027/GO:1903317/GO:1901564/GO:0005887/GO:0006793/GO:0050679/GO:0009725/GO:0051817/GO:1903319/GO:0051702/GO:0006508/GO:0070008/GO:0065008/GO:2000026/GO:0005261/GO:0050673/GO:0006725/GO:0010467/GO:0005911/GO:0035821/GO:0051346/GO:…	IMP/ISO/IDA/IEA/IBA/IEP	BP/MF/CC	PF09272/PF00089	Hpn	G3UWE8/O35453/E9Q5P0	path:mmu05203	mmu:15451	ko:K08665	Viral carcinogenesis - Mus musculus (house mouse)
ENSMUSG00000001260	0.640814576	0.414185133	0.571132771	0.529936106	0.480129081	0.529163365	0.373269957	0.498579144	0.472893792	0.553687169	0.674162794	0.468579892	0.559256022	0.680794497	0.555607741	0.56828611	0.394176528	0.465745175	0.482971229	0.558337397	gamma-aminobutyric acid (GABA) A receptor subunit gamma 1	GO:0098916/GO:0098660/GO:0099529/GO:0098796/GO:0005886/GO:0006810/GO:0042995/GO:0042165/GO:0030054/GO:0007267/GO:0099536/GO:0098960/GO:0098794/GO:0043005/GO:0023052/GO:0099095/GO:0005887/GO:0007214/GO:0042391/GO:0030594/GO:0031256/GO:0005575/GO:0098661/GO:0006820/GO:0038023/GO:0015075/GO:0098590/GO:0006811/GO:0022803/GO:0007268/GO:0099537/GO:0032589/GO:0009987/GO:0098656/GO:0015698/GO:0003674/GO:…	IDA/IBA/IEA/ISO	BP/MF/CC	PF02931/PF02932	Gabrg1	Q9R0Y8	path:mmu04727/path:mmu05033/path:mmu05032/path:mmu04723/path:mmu04080	mmu:14405	ko:K05186	GABAergic synapse - Mus musculus (house mouse)/Nicotine addiction - Mus musculus (house mouse)/Morphine addiction - Mus musculus (house mouse)/Retrograde endocannabinoid signaling - Mus musculus (house mouse)/Neuroactive ligand-receptor interaction - Mus musculus (house mouse)
ENSMUSG00000001270	11.52738387	12.01705359	11.57946194	12.10205629	12.19612112	11.60302468	12.02206312	11.83958934	11.64218442	11.83909204	11.43232382	11.68124019	11.92805851	11.87916448	12.3042168	12.32239555	11.80831605	12.03146029	12.13536735	11.85073983	creatine kinase brain	GO:0043167/GO:0032559/GO:0005737/GO:0110165/GO:0043005/GO:0042995/GO:0035639/GO:0042398/GO:0098590/GO:0006793/GO:0005615/GO:0036477/GO:0005622/GO:0042592/GO:0042396/GO:1901576/GO:0005576/GO:0005634/GO:0098771/GO:0003674/GO:0019637/GO:0004111/GO:0005488/GO:0071944/GO:0005575/GO:0032555/GO:1901265/GO:1901363/GO:0016775/GO:0043025/GO:1901564/GO:0036094/GO:0016772/GO:0019725/GO:1901566/GO:0120025/GO:…	IEA/HDA/ISO/IBA/IDA/IPI	MF/CC/BP	PF00217/PF02807	Ckb	Q04447	path:mmu01100/path:mmu00330	mmu:12709	ko:K00933	Metabolic pathways - Mus musculus (house mouse)/Arginine and proline metabolism - Mus musculus (house mouse)
ENSMUSG00000001280	1.86481153	1.892502396	2.049076762	1.79122023	1.827047571	1.874973758	1.823967501	1.558766232	1.858079701	1.782024054	1.950329408	1.783824612	2.067835281	2.007731665	1.650880077	1.907623048	1.844874339	2.046655165	1.554901565	1.791426696	trans-acting transcription factor 1	GO:0044271/GO:0031328/GO:0048592/GO:2000112/GO:0048518/GO:0031323/GO:0044550/GO:0051674/GO:0003690/GO:0048514/GO:0035821/GO:0009891/GO:0048568/GO:0051704/GO:0051716/GO:1990837/GO:0010604/GO:0003677/GO:0031326/GO:0031325/GO:0010467/GO:0009987/GO:0003700/GO:0031974/GO:0045766/GO:0044403/GO:0003676/GO:0051851/GO:0042221/GO:0051702/GO:0080090/GO:0009893/GO:0048562/GO:0044260/GO:0048524/GO:0043425/GO:…	IDA/ISO/IMP/IGI/IBA/IEA/ISS/IPI	BP/MF/CC	PF00096	Sp1	O89090/G3X8Q0	path:mmu05415/path:mmu05231/path:mmu04934/path:mmu04350/path:mmu04137/path:mmu05202/path:mmu04915/path:mmu05200/path:mmu04928/path:mmu05017/path:mmu05224/path:mmu04927/path:mmu05016/path:mmu05163/path:mmu01522	mmu:20683	ko:K04684	Diabetic cardiomyopathy - Mus musculus (house mouse)/Choline metabolism in cancer - Mus musculus (house mouse)/Cushing syndrome - Mus musculus (house mouse)/TGF-beta signaling pathway - Mus musculus (house mouse)/Mitophagy - animal - Mus musculus (house mouse)/Transcriptional misregulation in cancer - Mus musculus (house mouse)/Estrogen signaling pathway - Mus musculus (house mouse)/Pathways in c…
ENSMUSG00000001281	1.713371037	1.507685224	1.412936167	1.550810579	1.313970396	1.618102643	1.491332427	1.814409645	1.587200719	1.466787932	1.780041544	1.767255827	1.636593327	1.514018256	1.390285307	1.405011842	1.419072292	1.616903933	1.494542715	1.706862495	integrin beta 7	GO:0006928/GO:0016021/GO:0007154/GO:0048856/GO:0031224/GO:0051716/GO:0009987/GO:0007160/GO:0030154/GO:0000902/GO:0051674/GO:0032991/GO:0071944/GO:0005102/GO:0060089/GO:0005925/GO:0050794/GO:0007165/GO:0061756/GO:0048468/GO:0043235/GO:0051179/GO:0003674/GO:0008150/GO:0022610/GO:0098802/GO:0032502/GO:0009653/GO:0044877/GO:0065007/GO:0008104/GO:0050901/GO:0016020/GO:0050900/GO:0033036/GO:0007159/GO:…	IMP/ISO/IBA/IEA	BP/CC/MF	PF18372/PF08725/PF00362/PF17205/PF07974	Itgb7	P26011	path:mmu04510/path:mmu04151/path:mmu05412/path:mmu05165/path:mmu05414/path:mmu05202/path:mmu04514/path:mmu04512/path:mmu05410/path:mmu04672/path:mmu04810	mmu:16421	ko:K06590	Focal adhesion - Mus musculus (house mouse)/PI3K-Akt signaling pathway - Mus musculus (house mouse)/Arrhythmogenic right ventricular cardiomyopathy - Mus musculus (house mouse)/Human papillomavirus infection - Mus musculus (house mouse)/Dilated cardiomyopathy - Mus musculus (house mouse)/Transcriptional misregulation in cancer - Mus musculus (house mouse)/Cell adhesion molecules - Mus musculus (h…
ENSMUSG00000001285	6.246764804	6.605219043	6.176112725	6.505063312	6.557568035	6.307318311	6.572418095	6.308690951	6.478047106	6.753066846	5.944699072	6.234885796	6.647950022	6.416477173	6.608995454	6.259929242	6.359702565	6.193452199	6.473574004	6.267035229	melanocyte proliferating gene 1	GO:0007626/GO:0035641/GO:0005622/GO:0005575/GO:0005634/GO:0031981/GO:0005737/GO:0003674/GO:0043233/GO:0008150/GO:0043226/GO:0070013/GO:0005739/GO:0110165/GO:0043227/GO:0007610/GO:0035640/GO:0043229/GO:0031974/GO:0005654/GO:0043231	IMP/ISO/IBA/ND	BP/CC/MF	PF03690	Myg1	Q9JK81		mmu:60315	ko:K25877
ENSMUSG00000001288	2.900883715	3.048720801	2.989767178	2.97354271	2.717686266	2.8958597	2.917077354	2.72503621	2.948199331	2.911971998	2.896336693	3.077736155	2.869785974	3.18909522	2.770758884	2.809464359	3.090045747	2.903406034	3.089577237	2.929511919	retinoic acid receptor gamma	GO:1903506/GO:0002520/GO:0050789/GO:0046914/GO:0001012/GO:0060173/GO:0042127/GO:0009889/GO:0051171/GO:0035108/GO:1903507/GO:0048523/GO:0046872/GO:0048522/GO:0008150/GO:0007154/GO:0009952/GO:0080090/GO:0050793/GO:0001067/GO:0003707/GO:0031323/GO:0048384/GO:1902679/GO:0040007/GO:0002065/GO:0071704/GO:0034654/GO:0097659/GO:0072175/GO:0009888/GO:2000112/GO:0048048/GO:2000026/GO:0008134/GO:0009893/GO:…	IC/IGI/ISO/IEA/IBA/IMP/IDA/IPI/IEP	BP/MF/CC	PF00105/PF00104	Rarg	P18911		mmu:19411	ko:K08529
ENSMUSG00000001289	8.930643373	9.758488073	9.276964967	9.342782735	9.208009331	9.081882449	9.160998282	9.205048188	8.984569947	9.174434415	9.321027129	9.095215836	9.628979173	9.21055478	9.294826584	9.135865187	9.43514384	9.326625863	9.299853714	9.184205957	prefoldin 5	GO:0043227/GO:0043229/GO:0048513/GO:0005575/GO:0044238/GO:0060041/GO:0010646/GO:0051253/GO:0006139/GO:0005634/GO:0008150/GO:0006351/GO:0044271/GO:0051716/GO:0043226/GO:0009059/GO:0005515/GO:0009987/GO:0016055/GO:0010558/GO:0046483/GO:0048856/GO:0005622/GO:0001654/GO:0045934/GO:0006355/GO:0043231/GO:0008152/GO:0060070/GO:0065007/GO:0016272/GO:0010467/GO:0045892/GO:0010648/GO:0048880/GO:0051252/GO:…	IEA/IMP/IBA/ISO	CC/BP/MF	PF02996	Pfdn5	Q9WU28		mmu:56612	ko:K04797
ENSMUSG00000001300	1.195846075	0.986957392	1.345867793	1.009411233	1.120320185	1.009965331	1.40603012	0.981753946	1.241061135	1.26635942	0.97021157	1.113044205	1.199961588	1.01138418	1.018192465	1.029170708	1.155432376	1.329193975	1.136777253	1.537663055	ephrin B2	GO:0050863/GO:0040012/GO:0050789/GO:0000904/GO:0040011/GO:0002090/GO:0050865/GO:0050793/GO:0050767/GO:0051641/GO:0002682/GO:0050768/GO:0015031/GO:0042221/GO:0050680/GO:0045597/GO:0098590/GO:0002040/GO:0042110/GO:0098609/GO:0006898/GO:0002376/GO:0002684/GO:0051716/GO:0099149/GO:0050794/GO:0050867/GO:0001525/GO:0022409/GO:0046649/GO:0022603/GO:0015833/GO:0051649/GO:0097485/GO:0098657/GO:0051251/GO:…	IDA/ISO/IBA/IMP/IPI/IEA	BP/CC/MF	PF00812	Efnb2	Q4FJM3/P52800	path:mmu04360	mmu:13642	ko:K05463	Axon guidance - Mus musculus (house mouse)
ENSMUSG00000001305	3.917902105	3.898749706	4.283975577	3.732298669	3.749481502	3.841638264	3.673534802	3.906608565	3.819718536	4.197168988	4.09547889	3.9856483	4.00804831	3.855193052	4.119252364	3.731238212	3.928270141	3.928344209	3.533533445	3.882630083	ribosomal RNA processing 15 homolog (S. cerevisiae)	GO:0022613/GO:0005575/GO:0010467/GO:0016070/GO:0006725/GO:0006807/GO:0071840/GO:0046483/GO:0008150/GO:0003674/GO:0009987/GO:0008152/GO:0044237/GO:0006396/GO:0016072/GO:0044085/GO:0034660/GO:0034470/GO:0030687/GO:0006139/GO:0042254/GO:0006364/GO:0043170/GO:0071704/GO:0090304/GO:1901360/GO:0044238/GO:0030684/GO:0032991/GO:0034641/GO:1990904	IEA/IBA/ND	BP/CC/MF	PF07890	Rrp15	Q9CYX7		mmu:67223
ENSMUSG00000001313	9.58623736	9.681352493	9.267768857	9.225728201	10.13489633	9.545914149	9.827356856	9.512480172	9.656146577	9.745921143	9.252550436	9.420322161	9.868967305	9.339214493	9.950877155	10.11962706	9.301638213	9.354511708	9.94238095	9.42243837	Rho family GTPase 2	GO:0016462/GO:0007266/GO:0016787/GO:0016818/GO:0043227/GO:0048869/GO:0009987/GO:0050789/GO:0008150/GO:0007264/GO:0050794/GO:0048858/GO:0048812/GO:0048856/GO:0010770/GO:0010720/GO:0030030/GO:0010769/GO:0023052/GO:0036094/GO:0045664/GO:0051962/GO:0016477/GO:0010976/GO:0030182/GO:0050767/GO:0012505/GO:0048870/GO:0050770/GO:0040011/GO:0007409/GO:0048668/GO:0005768/GO:0047485/GO:0050772/GO:0007163/GO:…	IBA/IMP/IEA/ISO/IPI	MF/BP/CC	PF00071	Rnd2	Q9QYM5/A2A4Q3		mmu:11858	ko:K07858
ENSMUSG00000001323	3.665361261	3.568068615	3.707356532	3.287567914	3.192738621	3.823836465	3.786950926	3.749386767	3.794311959	3.661860704	3.936467835	3.612448877	3.587705379	3.782394061	3.17331624	3.432044268	3.71454498	3.689394896	3.222720495	3.631698022	serine racemase	GO:0046416/GO:0008652/GO:0016841/GO:0008721/GO:0044237/GO:0009069/GO:0043025/GO:0005524/GO:0016855/GO:0016854/GO:0043167/GO:0046872/GO:0016853/GO:0005488/GO:0009058/GO:0008152/GO:0042866/GO:0030170/GO:0019842/GO:0043168/GO:0071704/GO:0070279/GO:0005515/GO:0047661/GO:0070179/GO:0022607/GO:0097367/GO:0097159/GO:0003824/GO:0036361/GO:0071944/GO:0070178/GO:0042165/GO:0019752/GO:0030165/GO:0000287/GO:…	IDA/IBA/IEA/ISO/IMP/IPI	BP/MF/CC	PF00291	Srr	Q9QZX7	path:mmu01100/path:mmu00260/path:mmu00470	mmu:27364	ko:K12235	Metabolic pathways - Mus musculus (house mouse)/Glycine serine and threonine metabolism - Mus musculus (house mouse)/D-Amino acid metabolism - Mus musculus (house mouse)
ENSMUSG00000001333	0.911663556	0.902949134	1.222964531	1.373770692	1.186587194	0.994947924	1.098192977	1.046831658	1.094526742	0.976826733	1.118737353	1.230969866	0.982280479	1.119553653	0.959732856	0.971166592	1.108708761	0.872432145	1.093015376	1.069089461	syncoilin	GO:0005622/GO:0005515/GO:0043232/GO:0099081/GO:0005882/GO:0016020/GO:0009987/GO:0043229/GO:0005575/GO:0099080/GO:0110165/GO:0005737/GO:0030016/GO:0030018/GO:0099513/GO:0008150/GO:0003674/GO:0030017/GO:0005488/GO:0045202/GO:0005886/GO:0005829/GO:0030054/GO:0071944/GO:0099512/GO:0043226/GO:0031674/GO:0042383/GO:0043228/GO:0045111/GO:0031594/GO:0005856/GO:0045103/GO:0043292	ISS/IPI/IDA	CC/MF/BP	PF00038	Sync	C0LQ88/Q9EPM5/C0LQ87/C0LQ89		mmu:68828	ko:K10377
ENSMUSG00000001334	7.526783541	7.230187527	6.86989443	7.237372661	7.429325677	7.439372922	7.442663289	7.365411464	7.644026152	7.658437045	7.016493734	7.286226687	7.530686377	7.020013553	7.707335897	7.514403417	6.677790165	7.149128697	7.802633983	6.945208572	fibronectin type III domain containing 5	GO:0065007/GO:0030154/GO:0005575/GO:0045595/GO:0045444/GO:0016021/GO:0050794/GO:0005576/GO:0005515/GO:0016020/GO:0045600/GO:0030545/GO:0110165/GO:0014850/GO:0005622/GO:0051094/GO:0045598/GO:0045597/GO:0050873/GO:0050793/GO:0030546/GO:0043226/GO:0031224/GO:0050896/GO:0005886/GO:0043227/GO:0005783/GO:0071944/GO:0090335/GO:0043229/GO:0048018/GO:0009987/GO:0008150/GO:0043231/GO:0014823/GO:0090336/GO:…	IDA/IBA/IEA/IPI	BP/CC/MF	PF16066/PF00041	Fndc5	Q8K4Z2		mmu:384061	ko:K24486
ENSMUSG00000001348	0.129849847	0.261677819	0.326295262	0.612562434	0.144328975	0.353672607	0.244694238	0.172685944	0.121336042	0.155875463	0.34603283	0.508148975	0.158218643	0.321160008	0.204641797	0.2137589	0.167590262	0.578183534	0.16416685	0.25294616	acid phosphatase 5 tartrate resistant	GO:0045428/GO:0032496/GO:0001818/GO:0003674/GO:0044271/GO:0044419/GO:0032102/GO:0003824/GO:0043227/GO:0002237/GO:0001894/GO:0032611/GO:0032640/GO:0001817/GO:0003993/GO:0065007/GO:0042554/GO:0005506/GO:0043231/GO:0032692/GO:0000323/GO:0042221/GO:0034641/GO:0045453/GO:0001816/GO:0009605/GO:0032501/GO:0044237/GO:0044249/GO:0060349/GO:0032695/GO:0060348/GO:0042578/GO:0008150/GO:0032652/GO:0005488/GO:…	IMP/IBA/IDA/IEA	BP/MF/CC	PF00149	Acp5	Q05117	path:mmu04380/path:mmu05323/path:mmu01100/path:mmu04142/path:mmu00740	mmu:11433	ko:K14379	Osteoclast differentiation - Mus musculus (house mouse)/Rheumatoid arthritis - Mus musculus (house mouse)/Metabolic pathways - Mus musculus (house mouse)/Lysosome - Mus musculus (house mouse)/Riboflavin metabolism - Mus musculus (house mouse)
ENSMUSG00000001366	7.032001805	6.414587574	7.009477346	6.507714145	6.682874691	7.15998505	7.212821756	6.692353627	7.317055993	6.882240392	7.060041109	6.711287825	6.670619923	6.6050073	7.399961241	7.100421244	6.585527822	6.417921846	6.917830241	6.526139759	f-box protein 9	GO:0030163/GO:0032502/GO:1902531/GO:0030154/GO:0044248/GO:0032991/GO:0031461/GO:0031146/GO:0044238/GO:1901575/GO:0043632/GO:0019538/GO:1902494/GO:0032446/GO:1901565/GO:0019005/GO:0016567/GO:0044237/GO:1990234/GO:0009987/GO:0023051/GO:0019941/GO:0036211/GO:1901564/GO:0006511/GO:0048869/GO:0035556/GO:0023052/GO:0043170/GO:0050896/GO:0006508/GO:0010498/GO:0098542/GO:0043207/GO:0009057/GO:0051603/GO:…	IBA/IMP/ISO/IGI	BP/CC	PF12937	Fbxo9	Q8BK06		mmu:71538	ko:K10295
ENSMUSG00000001376	4.080759888	3.927018933	4.279655148	4.09297558	3.678155242	4.284550447	4.277985966	3.98203085	4.405614423	4.388972164	4.191558595	4.128313516	3.657199631	4.034977414	4.41568784	3.688174308	4.218262953	4.181478483	3.654369008	4.149465586	VPS50 EARP/GARPII complex subunit	GO:0031982/GO:0016192/GO:0046907/GO:0016197/GO:0051179/GO:0015031/GO:0003674/GO:0016020/GO:0048471/GO:0031410/GO:0043231/GO:0071702/GO:0005488/GO:0000149/GO:0051234/GO:0032456/GO:0043229/GO:0055037/GO:0071705/GO:1990745/GO:0005886/GO:0097708/GO:0071944/GO:0009987/GO:0005773/GO:0012505/GO:0110165/GO:0042886/GO:0008150/GO:0033036/GO:0043227/GO:0051649/GO:0043226/GO:0032991/GO:0005622/GO:0005768/GO:…	IEA/ISO/IDA	CC/BP/MF	PF10474/PF10475	Vps50	Q8CI71		mmu:73288	ko:K23288
ENSMUSG00000001380	7.730712708	7.718654028	7.55302074	7.305466739	7.745276688	7.629662464	7.640253291	7.562899718	7.831024106	7.836623672	7.497281173	7.659811449	7.665050035	7.577765597	7.739999383	7.791645873	7.651611868	7.45456196	7.844439764	7.645093039	histidyl-tRNA synthetase	GO:0034641/GO:0032555/GO:0003674/GO:0034660/GO:0006418/GO:0008152/GO:0046483/GO:0006414/GO:0032559/GO:0030554/GO:0006427/GO:0044281/GO:0140101/GO:0005575/GO:0005524/GO:0000166/GO:0036094/GO:0044271/GO:0009058/GO:0032553/GO:0034645/GO:0043170/GO:0006082/GO:0090304/GO:0071704/GO:0005829/GO:0003824/GO:0043603/GO:0035639/GO:0006412/GO:0044237/GO:0043436/GO:1901265/GO:0005515/GO:0005739/GO:0008150/GO:…	IBA/IEA/ISO	BP/MF/CC	PF13393/PF03129/PF00458	Hars	Q61035	path:mmu00970	mmu:15115	ko:K01892	Aminoacyl-tRNA biosynthesis - Mus musculus (house mouse)
ENSMUSG00000001383	5.898170724	5.784213518	5.983161569	5.921620099	5.917877839	6.094788184	5.769125848	5.695672513	5.854135143	5.789579819	6.139032088	5.876368349	5.8447585	5.788563046	5.688877698	5.593176993	6.157272174	5.92941386	5.887353403	5.856581959	zinc finger matrin type 2	GO:0003674/GO:0097526/GO:0010467/GO:0009987/GO:0000375/GO:0043231/GO:0003676/GO:0000398/GO:0090304/GO:0008380/GO:0005575/GO:0000377/GO:0043229/GO:1990904/GO:0005622/GO:0046540/GO:0044237/GO:0032991/GO:0044238/GO:0120114/GO:1901360/GO:0120115/GO:0016071/GO:0016070/GO:0006139/GO:0006725/GO:0110165/GO:0030532/GO:0043226/GO:0071704/GO:0003677/GO:0006397/GO:0046914/GO:0097159/GO:1901363/GO:0043227/GO:…	IEA/IBA/ISO	MF/CC/BP	PF12171	Zmat2	Q9CPW7	path:mmu03040	mmu:66492	ko:K12848	Spliceosome - Mus musculus (house mouse)
ENSMUSG00000001403	1.563517216	2.132418163	2.317244691	2.162327831	1.714471792	1.530853736	1.458350625	2.039142847	1.447807036	1.531178609	2.118518032	1.575615827	1.536744846	2.093863624	1.646421376	1.662731642	2.297008601	2.342964003	1.64086978	1.898195079	ubiquitin-conjugating enzyme E2C	GO:0044260/GO:0044265/GO:0008152/GO:0005575/GO:0043933/GO:0044267/GO:0008150/GO:0044238/GO:0051301/GO:0061650/GO:0051603/GO:0065003/GO:0019538/GO:0019899/GO:0051783/GO:0044085/GO:0019941/GO:0051726/GO:0019787/GO:0061631/GO:0019725/GO:0008144/GO:0016043/GO:0043229/GO:0003824/GO:0044237/GO:0010994/GO:1901565/GO:0007088/GO:0043226/GO:0005737/GO:0048518/GO:0016740/GO:0016567/GO:0065007/GO:0044389/GO:…	ISO/IBA/IEA	BP/CC/MF	PF00179	Ube2c	A2A4Z0/Q9D1C1	path:mmu04120	mmu:68612	ko:K06688	Ubiquitin mediated proteolysis - Mus musculus (house mouse)
ENSMUSG00000001415	5.966594517	5.661447567	5.713391607	5.536176259	6.245135608	5.824441424	5.966553738	6.134612628	5.913408012	5.900631466	5.498270288	6.005880349	6.093098969	5.570091837	5.694572692	5.969998067	5.587065941	5.427446082	6.148032594	5.877253659	Smg-5 homolog nonsense mediated mRNA decay factor (C. elegans)	GO:0050789/GO:0033044/GO:0034641/GO:1901576/GO:0051052/GO:0034622/GO:0048519/GO:0009058/GO:0046483/GO:0005575/GO:0050794/GO:0006807/GO:0042592/GO:0042162/GO:0065008/GO:1904356/GO:0006793/GO:0009056/GO:0070034/GO:0071704/GO:0043226/GO:0043170/GO:0060249/GO:0005488/GO:0019438/GO:0005515/GO:0042826/GO:0060255/GO:0003676/GO:1901363/GO:0065007/GO:0006796/GO:0065004/GO:0065003/GO:0032204/GO:0019219/GO:…	ISO/IBA/IEA	BP/CC/MF	PF10374/PF10373	Smg5	Q6ZPY2/Q3UZS1	path:mmu03015	mmu:229512	ko:K11125	mRNA surveillance pathway - Mus musculus (house mouse)
ENSMUSG00000001416	7.959098471	7.825510104	7.773472812	8.027322242	7.968921374	7.989890626	7.857310163	7.853613153	7.715175312	8.078675226	7.82757478	8.105709329	7.961051289	7.817088242	7.56999553	8.173477637	8.006659526	7.955135463	7.819159748	7.97134601	chaperonin containing Tcp1 subunit 3 (gamma)	GO:0034645/GO:0045935/GO:0033044/GO:0044238/GO:0000166/GO:0005856/GO:0009893/GO:0034622/GO:0009889/GO:0099081/GO:0019222/GO:0033365/GO:0034641/GO:0070201/GO:0101031/GO:0016043/GO:0110165/GO:0033043/GO:0034654/GO:0099080/GO:0035036/GO:0034502/GO:0009987/GO:0019219/GO:0005737/GO:0019438/GO:0005575/GO:0045184/GO:0060255/GO:0032879/GO:0009891/GO:0034613/GO:0032991/GO:0010604/GO:0015630/GO:0018130/GO:…	ISO/IEA/IBA/IDA/HDA/IMP/IPI	BP/MF/CC	PF00118	Cct3	Q3U4U6/P80318		mmu:12462	ko:K09495
ENSMUSG00000001418	7.191983677	7.782991181	7.351511669	8.020994457	7.373070368	7.258359966	7.172799546	7.475782021	7.044057313	7.256027687	7.546526516	7.686102579	7.313457681	7.932722329	7.594175039	7.486395571	7.712241666	7.850680421	7.000633675	7.830187224	glycosylated lysosomal membrane protein	GO:0031224/GO:0005764/GO:0034645/GO:0005634/GO:0016070/GO:0097659/GO:0018130/GO:0080090/GO:0110165/GO:0000976/GO:0048518/GO:0031325/GO:0045935/GO:0034654/GO:0043229/GO:0019219/GO:0031323/GO:0043565/GO:0001067/GO:0044249/GO:0050794/GO:0045944/GO:0009889/GO:0043231/GO:0090304/GO:0000323/GO:0043227/GO:0010628/GO:0009987/GO:0010556/GO:0005575/GO:0044237/GO:0044260/GO:0006351/GO:0006366/GO:0050789/GO:…	IDA/ISO/IEA/IBA	CC/BP/MF	PF15065	Glmp	Q9JHJ3		mmu:56700
ENSMUSG00000001419	7.02699969	7.10878889	6.716578834	6.731740457	7.071505454	6.862464922	6.731598486	6.97291803	6.657743143	6.965475749	6.782761973	6.830283855	7.076496608	6.37498983	6.725888351	6.770765544	6.727898939	6.793825746	7.303861384	6.957698171	myocyte enhancer factor 2D	GO:0007399/GO:0043229/GO:0009653/GO:0005575/GO:0007519/GO:0008134/GO:0090304/GO:0046983/GO:0005515/GO:0051254/GO:0003674/GO:0080090/GO:0060255/GO:0045893/GO:0048856/GO:0009887/GO:0031323/GO:0043228/GO:0009888/GO:0019219/GO:0071704/GO:0009059/GO:0009889/GO:0003690/GO:0007517/GO:1901360/GO:0046483/GO:0034645/GO:0048731/GO:0097159/GO:0034654/GO:0046982/GO:0006915/GO:0043227/GO:0009058/GO:0018130/GO:…	IEA/IBA/IGI/IMP/ISO/IDA/IPI/IC	BP/CC/MF	PF00319/PF12347	Mef2d	Q921S6/Q63943/E9QKT0	path:mmu04371/path:mmu04928/path:mmu04022	mmu:17261	ko:K09262	Apelin signaling pathway - Mus musculus (house mouse)/Parathyroid hormone synthesis secretion and action - Mus musculus (house mouse)/cGMP-PKG signaling pathway - Mus musculus (house mouse)
ENSMUSG00000001420	0.791093278	1.087418976	1.130991563	0.866913906	0.890281031	0.852397922	1.010820949	1.334027142	1.128286561	0.899883959	1.042086477	0.986855231	0.809467033	1.115941288	0.880525703	1.152274246	0.931547039	0.982272867	0.918137207	1.156573781	transmembrane protein 79	GO:0005622/GO:0006810/GO:0042802/GO:0043226/GO:0032940/GO:0048871/GO:0032588/GO:0012501/GO:0048729/GO:0043231/GO:0042592/GO:0009888/GO:0048731/GO:0005575/GO:0043229/GO:0048878/GO:0043227/GO:0048730/GO:0016050/GO:0042303/GO:0005515/GO:0042633/GO:0012505/GO:0070268/GO:0010256/GO:0008219/GO:0042335/GO:0016020/GO:0048518/GO:0003674/GO:0044085/GO:0051234/GO:0048468/GO:0006996/GO:0065007/GO:0005737/GO:…	IDA/IMP/ISO/IBA/IEA	CC/BP/MF		Tmem79	Q9D709		mmu:71913
ENSMUSG00000001424	4.981849575	5.228055086	5.005875031	5.358867195	4.98882482	5.35836153	5.291676095	5.2678874	5.088707068	4.986000795	5.027478691	5.147070332	4.905123666	5.317600652	5.380100008	4.483351305	5.083751707	5.520759615	5.226856547	5.17309473	staphylococcal nuclease and tudor domain containing 1	GO:0006401/GO:0043231/GO:1990904/GO:0009987/GO:0043229/GO:0097159/GO:0044238/GO:0006139/GO:0046483/GO:0005737/GO:0090304/GO:0046700/GO:0019222/GO:0009057/GO:1901575/GO:0005739/GO:0016788/GO:0003676/GO:0009892/GO:1905172/GO:0003723/GO:0003824/GO:0010587/GO:0071704/GO:0016070/GO:0044877/GO:0010605/GO:0016458/GO:0016787/GO:0019439/GO:0009056/GO:0005575/GO:0044270/GO:0010586/GO:0005829/GO:0065007/GO:…	IBA/IEA/ISO/HDA/IDA/IPI	BP/CC/MF	PF00565/PF00567	Snd1	Q3TJ56/Q78PY7	path:mmu05203	mmu:56463	ko:K15979	Viral carcinogenesis - Mus musculus (house mouse)
ENSMUSG00000001435	3.043688238	2.693352306	2.76317241	3.037120077	2.66087967	2.703931086	2.873852729	3.336802744	2.733056563	2.636267805	2.882347868	2.773983603	3.237501784	2.586039094	2.847829977	2.669118874	2.878473294	2.696558629	2.76049911	3.1353804	collagen type XVIII alpha 1	GO:0051674/GO:0006915/GO:0006928/GO:0005615/GO:0043065/GO:0031012/GO:0008284/GO:0072358/GO:0060429/GO:0043062/GO:0048468/GO:0032501/GO:0005604/GO:0005198/GO:0048514/GO:0008283/GO:0002064/GO:0050789/GO:0043068/GO:0051179/GO:0005201/GO:0001944/GO:0003382/GO:0043067/GO:0046872/GO:0050794/GO:0030334/GO:0030335/GO:0043167/GO:0030855/GO:0003158/GO:0065007/GO:0030154/GO:0008150/GO:0071840/GO:0030198/GO:…	IDA/ISO/IMP/IBA/HDA/RCA/IEA	BP/CC/MF	PF01391/PF06482/PF06121/PF01392	Col18a1	P39061/E9QPX1	path:mmu04974	mmu:12822	ko:K06823	Protein digestion and absorption - Mus musculus (house mouse)
ENSMUSG00000001436	3.90223357	4.337016334	4.318786962	4.383739147	4.275124056	4.282024722	4.205833396	4.574679244	4.239391397	4.524056779	4.080506086	4.274682722	4.365136657	4.397602772	4.65018378	4.173962147	4.560333038	4.620127306	4.40143104	4.524914611	solute carrier family 19 (folate transporter) member 1	GO:0016323/GO:0031226/GO:0008518/GO:0016021/GO:0120025/GO:0005886/GO:0110165/GO:1901363/GO:0006811/GO:0005575/GO:0008517/GO:0051181/GO:0006810/GO:0016020/GO:0006855/GO:1905039/GO:1903825/GO:0051234/GO:0008144/GO:0005856/GO:0015301/GO:0005903/GO:0005622/GO:0031224/GO:0005884/GO:0140323/GO:0055085/GO:0099081/GO:0009987/GO:0098590/GO:0071705/GO:0033218/GO:0016324/GO:0071702/GO:1904447/GO:0005902/GO:…	IBA/IEA/ISO/IDA	CC/MF/BP	PF01770	Slc19a1	Q542F3/P41438	path:mmu01523/path:mmu04977	mmu:20509	ko:K14609	Antifolate resistance - Mus musculus (house mouse)/Vitamin digestion and absorption - Mus musculus (house mouse)
ENSMUSG00000001440	5.061838922	4.568984503	5.075512913	4.747720379	4.561792709	5.515463244	5.007910765	4.998065338	5.331095862	5.092062844	5.062883217	5.042518466	4.913050067	5.105485144	5.057856412	4.542735848	4.969486602	4.993315847	4.275162225	4.991065044	karyopherin (importin) beta 1	GO:0005737/GO:0051225/GO:0043232/GO:0043231/GO:0005575/GO:0045184/GO:0051276/GO:0031981/GO:0051303/GO:0005643/GO:0033036/GO:0005634/GO:0005622/GO:0051234/GO:0035770/GO:0043228/GO:0043233/GO:0032991/GO:0031967/GO:0044085/GO:0019894/GO:0043227/GO:0043229/GO:0030953/GO:0051169/GO:0051293/GO:0033365/GO:0051170/GO:0051179/GO:0051656/GO:0005654/GO:0031090/GO:0050794/GO:0051640/GO:0097435/GO:0048285/GO:…	IBA/IDA/ISO/IEA/IPI	CC/BP/MF	PF03810	Kpnb1	P70168/Q3UHW8	path:mmu03013/path:mmu05207	mmu:16211	ko:K14293	Nucleocytoplasmic transport - Mus musculus (house mouse)/Chemical carcinogenesis - receptor activation - Mus musculus (house mouse)
ENSMUSG00000001441	8.878213438	8.856557967	8.862882473	8.777103126	9.035964499	8.961639492	8.940056756	8.925948409	8.900564309	8.882997723	8.761433042	8.834564434	8.96691848	8.734183514	8.690269909	9.100049288	8.890742429	8.690624267	9.097460931	8.800700307	aminopeptidase puromycin sensitive	GO:0140096/GO:0046872/GO:0004177/GO:0034641/GO:0019538/GO:0033218/GO:0009987/GO:0016787/GO:0046914/GO:0006950/GO:0044248/GO:0008235/GO:0044237/GO:0033554/GO:0008238/GO:0006508/GO:0003824/GO:0043231/GO:0070011/GO:0006807/GO:0008237/GO:0008150/GO:0036293/GO:0006518/GO:0036294/GO:0005622/GO:0005575/GO:0050896/GO:0044238/GO:0110165/GO:0043229/GO:0071453/GO:0043171/GO:0005488/GO:0008270/GO:0003674/GO:…	IEA/ISO/IBA	MF/BP/CC	PF11838/PF01433	Npepps	Q11011		mmu:19155	ko:K08776
ENSMUSG00000001445	6.454790277	6.727525605	6.558798253	6.733286938	6.575103046	6.494704827	6.382541863	6.378736496	6.414019298	6.599092993	6.605877476	6.371973393	6.714987996	6.502220748	6.432444589	6.792225486	6.832604844	6.192198857	6.291629656	6.560693818	mitochondrial ribosomal protein L10	GO:0009987/GO:0006412/GO:0005654/GO:0005739/GO:0009059/GO:0042254/GO:0043170/GO:0005575/GO:0005634/GO:1990904/GO:0008150/GO:0005737/GO:0043231/GO:0009058/GO:0005622/GO:0005840/GO:0110165/GO:0031974/GO:0043232/GO:1901566/GO:0043228/GO:0015934/GO:0008152/GO:0043229/GO:0043233/GO:0005198/GO:0043227/GO:0006518/GO:0005762/GO:0005761/GO:0043603/GO:0043226/GO:0034641/GO:0031981/GO:1901576/GO:0000315/GO:…	ISS/IBA/ISO/HDA/IEA	BP/CC/MF		Mrpl10	Q3TBW2	path:mmu03010	mmu:107732	ko:K02864	Ribosome - Mus musculus (house mouse)
ENSMUSG00000001467	4.612308052	3.8859797	4.252830374	3.822254623	4.41277076	4.906716735	4.635055296	4.310347437	4.982076828	4.684794899	4.097778368	3.77235508	4.195476471	4.291437083	4.146498446	4.496451239	3.856139345	3.905555574	3.93521319	4.345388443	cytochrome P450 family 51	GO:0008152/GO:0051234/GO:0008202/GO:0008150/GO:0060255/GO:0005575/GO:0051248/GO:0008610/GO:0012505/GO:0005506/GO:0046903/GO:0048519/GO:0016125/GO:0065007/GO:0046906/GO:0046872/GO:0051241/GO:0070201/GO:0016020/GO:0005773/GO:0046914/GO:0005488/GO:0044238/GO:0044281/GO:0009894/GO:0071704/GO:0055114/GO:0016021/GO:0005886/GO:0004497/GO:0046165/GO:0006066/GO:0043229/GO:0009895/GO:0044283/GO:0008398/GO:…	IEA/IMP/IBA/ISO/TAS	BP/CC/MF	PF00067	Cyp51	Q8K0C4	path:mmu01100/path:mmu00100	mmu:13121	ko:K05917	Metabolic pathways - Mus musculus (house mouse)/Steroid biosynthesis - Mus musculus (house mouse)
ENSMUSG00000001472	10.08807233	10.23205841	10.01560919	9.730894179	10.39953631	10.13902573	10.28771132	10.06009701	10.05275028	10.07643111	9.882944564	9.966960281	10.30938708	9.646906131	10.4507944	10.37416318	9.819261832	9.812039811	10.48733882	9.748376665	transcription factor 25 (basic helix-loop-helix)	GO:0003676/GO:0006139/GO:0050789/GO:0043226/GO:0045934/GO:0043170/GO:0006725/GO:0001067/GO:0034641/GO:0006351/GO:0031327/GO:0110165/GO:0048519/GO:0005622/GO:0006357/GO:0032774/GO:0005634/GO:0051252/GO:0043229/GO:0097659/GO:0031326/GO:0046483/GO:0048523/GO:1901360/GO:1901363/GO:0005488/GO:0019438/GO:1901576/GO:0044271/GO:0097159/GO:1901362/GO:0140110/GO:0051172/GO:0060255/GO:0044260/GO:0044238/GO:…	IBA/ISO/IDA/IEA	MF/BP/CC	PF04910	Tcf25	Q8R3L2/B2ZAC8		mmu:66855	ko:K24970
ENSMUSG00000001473	3.562164485	4.037161315	4.305063226	4.622905286	3.488648032	3.473384818	3.411934225	4.573053943	3.498615963	3.638694841	4.364994329	4.207832896	3.767156581	4.561713511	3.869443522	3.76574973	4.471562532	4.656057493	3.607166014	4.266716439	tubulin beta 6 class V	GO:0000278/GO:0000166/GO:0017111/GO:0032549/GO:0019001/GO:0001882/GO:0043167/GO:0043232/GO:0022402/GO:0097159/GO:0001883/GO:0000280/GO:0000226/GO:1901363/GO:0043228/GO:0071840/GO:0048285/GO:0110165/GO:0005200/GO:0043229/GO:0005856/GO:0043226/GO:1901265/GO:0007049/GO:0005525/GO:0005737/GO:0005622/GO:0016818/GO:0036094/GO:0005575/GO:0005488/GO:0003674/GO:0099513/GO:0043168/GO:0016462/GO:0016043/GO:…	IBA/IEA/ISO	BP/MF/CC	PF03953/PF00091	Tubb6	Q3UMM1/Q922F4	path:mmu05010/path:mmu05012/path:mmu05022/path:mmu05016/path:mmu05014/path:mmu05020/path:mmu05132/path:mmu04540/path:mmu04145	mmu:67951	ko:K07375	Alzheimer disease - Mus musculus (house mouse)/Parkinson disease - Mus musculus (house mouse)/Pathways of neurodegeneration - multiple diseases - Mus musculus (house mouse)/Huntington disease - Mus musculus (house mouse)/Amyotrophic lateral sclerosis - Mus musculus (house mouse)/Prion disease - Mus musculus (house mouse)/Salmonella infection - Mus musculus (house mouse)/Gap junction - Mus musculu…
ENSMUSG00000001482	5.380817247	5.306509721	5.157372147	5.354841524	5.170338321	5.087904255	5.260640235	5.323200907	5.335508113	5.498310077	5.451849809	4.844129689	5.249952585	5.258710911	5.117792393	5.532168109	5.191467098	5.231894236	5.310596185	4.898779439	differentially expressed in FDCP 8	GO:0031346/GO:0003674/GO:0051239/GO:0051179/GO:0051640/GO:0001894/GO:1900027/GO:0043167/GO:0031529/GO:1900029/GO:0042592/GO:0051130/GO:0046872/GO:0051240/GO:0120035/GO:0120036/GO:0034105/GO:0022607/GO:0051716/GO:0032501/GO:0048522/GO:0035556/GO:0023052/GO:0034103/GO:0051641/GO:0005488/GO:0045453/GO:0050794/GO:0032418/GO:0030030/GO:0048771/GO:0044085/GO:0030031/GO:0045124/GO:0048871/GO:0044089/GO:…	IMP/IEA/IPI/ND	BP/MF/CC	PF00130/PF13901	Def8	Q99J78/A0A0R4IZW6/G3X9U5		mmu:23854
ENSMUSG00000001493	2.468340381	2.349523382	2.240979799	2.636947482	2.136988342	2.347977089	2.081637368	2.116779716	2.342710779	2.218919092	2.684309378	2.422997888	2.302760632	2.683222198	2.385053615	2.310966991	2.132591005	2.282691688	2.101478434	2.155873477	mesenchyme homeobox 1	GO:0032502/GO:0032501/GO:0008152/GO:0005634/GO:0005575/GO:0005622/GO:0006351/GO:0005737/GO:0008150/GO:0006139/GO:0060255/GO:0006355/GO:1901360/GO:0051254/GO:0043227/GO:0006807/GO:0043229/GO:0043226/GO:0009058/GO:0043565/GO:0048518/GO:0005515/GO:0097659/GO:1901362/GO:0061053/GO:0010468/GO:0010557/GO:0007275/GO:0110165/GO:0097159/GO:0003700/GO:0061056/GO:0051252/GO:0045935/GO:0045944/GO:0010556/GO:…	IEA/IMP/IGI/IDA/IBA/IPI	BP/CC/MF	PF00046	Meox1	P32442		mmu:17285	ko:K09322
ENSMUSG00000001504	3.670239693	3.515330184	3.175686148	2.908317418	3.225382564	3.127973594	3.349909323	3.308724887	3.386792387	3.159814264	3.323566667	2.902924742	3.396406913	3.296445598	2.836011032	3.566464397	3.148644447	2.95966128	3.286734429	3.286098761	Iroquois homeobox 2	GO:0019219/GO:0097659/GO:0019222/GO:0031323/GO:0090304/GO:0009058/GO:0097159/GO:2001141/GO:0016070/GO:0031324/GO:0035295/GO:0009059/GO:0008150/GO:0032502/GO:0019438/GO:0032774/GO:0006139/GO:0065007/GO:0032501/GO:0008152/GO:0031326/GO:0071704/GO:0005634/GO:2000113/GO:0035148/GO:0009887/GO:0080090/GO:0072272/GO:0048646/GO:0045892/GO:0005488/GO:0010605/GO:0003676/GO:0003674/GO:0072009/GO:0035239/GO:…	ISO/IEA/IEP	BP/MF/CC	PF05920	Irx2	P81066		mmu:16372	ko:K24889
ENSMUSG00000001507	5.590928113	5.665437829	5.648914226	5.296018566	6.060331998	5.521565991	5.757445677	5.685852855	5.290566971	5.617365347	5.002935508	5.419569577	5.707002195	5.398227566	6.284302715	5.905736417	5.573728516	5.662554493	6.098675488	5.550018934	integrin alpha 3	GO:0110165/GO:0051058/GO:0010604/GO:0098590/GO:0044877/GO:0051130/GO:0031224/GO:0051129/GO:0032774/GO:0030510/GO:0010631/GO:0048583/GO:0051171/GO:0031175/GO:0048666/GO:0051094/GO:0060541/GO:0098636/GO:0065007/GO:0051056/GO:0032879/GO:0099513/GO:0051128/GO:0007229/GO:0032501/GO:0043226/GO:0045202/GO:0098552/GO:0044260/GO:0030509/GO:0060341/GO:0010468/GO:0097205/GO:0003674/GO:0044271/GO:0048585/GO:…	IEA/IGI/ISO/IDA/IPI/IMP	CC/BP/MF	PF08441/PF01839	Itga3	Q62470	path:mmu04510/path:mmu05200/path:mmu04810/path:mmu05222/path:mmu05410/path:mmu05414/path:mmu05412/path:mmu04151/path:mmu05165/path:mmu04640/path:mmu04512	mmu:16400	ko:K06482	Focal adhesion - Mus musculus (house mouse)/Pathways in cancer - Mus musculus (house mouse)/Regulation of actin cytoskeleton - Mus musculus (house mouse)/Small cell lung cancer - Mus musculus (house mouse)/Hypertrophic cardiomyopathy - Mus musculus (house mouse)/Dilated cardiomyopathy - Mus musculus (house mouse)/Arrhythmogenic right ventricular cardiomyopathy - Mus musculus (house mouse)/PI3K-Ak…
ENSMUSG00000001508	0.937012008	1.457065847	1.479196954	1.034941877	0.962104351	1.005179205	1.103459745	1.24279195	0.961149611	1.041107068	1.295925074	1.209746316	1.135375913	1.569163821	1.030086694	1.041734272	1.171955439	1.488926865	0.962150687	1.216409495	sarcoglycan alpha (dystrophin-associated glycoprotein)	GO:0098805/GO:0043226/GO:0043167/GO:0098857/GO:0042383/GO:0046872/GO:0070161/GO:0032991/GO:0110165/GO:0098797/GO:0043169/GO:0045121/GO:0005886/GO:0043232/GO:0098589/GO:0043229/GO:0061024/GO:0043228/GO:0016043/GO:0016020/GO:0005575/GO:0030054/GO:0098796/GO:0071840/GO:0016021/GO:0016012/GO:0016010/GO:0071944/GO:0005509/GO:0031224/GO:0090665/GO:0008150/GO:0005737/GO:0005622/GO:0031226/GO:0003674/GO:…	IDA/IEA/IBA/TAS	CC/MF/BP	PF05510	Sgca	P82350	path:mmu05412/path:mmu05414/path:mmu05416/path:mmu05410	mmu:20391	ko:K12565	Arrhythmogenic right ventricular cardiomyopathy - Mus musculus (house mouse)/Dilated cardiomyopathy - Mus musculus (house mouse)/Viral myocarditis - Mus musculus (house mouse)/Hypertrophic cardiomyopathy - Mus musculus (house mouse)
ENSMUSG00000001517	0.540902234	0.659121541	0.843218167	0.841484831	0.693794226	0.586498269	0.913276679	0.653672005	0.649068556	0.648569681	0.733427874	0.645044578	0.653264131	0.713998329	0.614628016	0.623681723	0.675355008	0.732017318	0.853561521	0.828664751	forkhead box M1	GO:0033554/GO:0034641/GO:0009889/GO:0051171/GO:0051173/GO:0051056/GO:0051172/GO:0034645/GO:0065007/GO:0044238/GO:0009059/GO:0050794/GO:0009653/GO:0010604/GO:0009987/GO:0070303/GO:0050896/GO:0051093/GO:0010468/GO:0060255/GO:0072331/GO:0010564/GO:0072358/GO:0051054/GO:0071840/GO:0005488/GO:0051052/GO:0044212/GO:0008284/GO:0051726/GO:0010563/GO:0005515/GO:0050793/GO:0005575/GO:0010557/GO:0071704/GO:…	ISO/IDA/IEA/IMP/ISS/IPI	BP/MF/CC	PF00250	Foxm1	Q6P1H7	path:mmu04218	mmu:14235	ko:K09406	Cellular senescence - Mus musculus (house mouse)
ENSMUSG00000001518	5.516018809	5.560984755	5.222995251	5.256377273	5.562165178	4.92121487	5.344401402	5.262430713	5.415719405	5.366938555	5.268391875	5.468775625	5.506529942	5.433025255	5.282944482	5.977555432	5.087026561	5.205483278	5.280276605	5.394433678	integrin alpha FG-GAP repeat containing 2	GO:0005765/GO:0043227/GO:0005764/GO:0005634/GO:0043229/GO:0005654/GO:0043226/GO:0008150/GO:0016020/GO:0043233/GO:0010648/GO:0002252/GO:0043231/GO:0005737/GO:0046649/GO:0023051/GO:0005622/GO:0023052/GO:0007275/GO:0098588/GO:0005774/GO:0048519/GO:0110165/GO:0006955/GO:0002313/GO:0003674/GO:0045321/GO:0048513/GO:0002521/GO:0023057/GO:0071496/GO:0032991/GO:0002376/GO:0030097/GO:0098805/GO:0048523/GO:…	ISO/IEA/IDA/IMP/ND	CC/BP/MF	PF15907	Itfg2	Q91WI7		mmu:101142	ko:K23296
ENSMUSG00000001520	5.799251729	5.947845394	5.378164552	5.424132938	6.135983105	6.019567322	6.062270612	5.826568532	6.006649765	6.055368314	5.444229565	5.286803743	5.984843367	5.353645605	5.750637105	5.707292857	5.407235913	5.462248578	6.137208825	5.565174612	nuclear receptor interacting protein 2	GO:0050794/GO:2001141/GO:0048519/GO:2000112/GO:2000113/GO:0010467/GO:0016787/GO:1901362/GO:1901564/GO:0005622/GO:0005575/GO:1903506/GO:1902679/GO:0050789/GO:0046483/GO:1901576/GO:0019222/GO:0008150/GO:1903507/GO:0009058/GO:0006355/GO:0008152/GO:0018130/GO:0048523/GO:0051171/GO:0007219/GO:0006807/GO:0010605/GO:0045934/GO:1901360/GO:0010468/GO:0009889/GO:0006357/GO:0007165/GO:0006725/GO:0019538/GO:…	IDA/IEA/ISO/IPI	BP/MF/CC	PF09668	Nrip2	Q9JHR9		mmu:60345	ko:K13215
ENSMUSG00000001521	4.756158704	4.933251851	5.141710499	4.995468034	4.427302501	4.474540761	4.717285269	4.965763099	4.787681541	4.574819538	5.118865031	4.890216818	4.759478243	4.944975935	4.709626404	4.677979377	4.94899917	5.224587563	4.330697826	4.654340295	tubby-like protein 3	GO:0048705/GO:0015630/GO:0051179/GO:0048702/GO:0005737/GO:0035148/GO:0048704/GO:0001843/GO:0014020/GO:0009653/GO:0035239/GO:0048585/GO:0016020/GO:0042995/GO:0060433/GO:0009790/GO:0099080/GO:1901621/GO:0048523/GO:0042733/GO:0035869/GO:0048699/GO:0050896/GO:0048701/GO:0060348/GO:0009792/GO:0021953/GO:0035295/GO:0060429/GO:0023057/GO:0099081/GO:0007186/GO:0032991/GO:2000026/GO:0060322/GO:0060606/GO:…	IMP/IDA/IBA/IEA/ISO/IGI	BP/CC/MF	PF01167/PF16322	Tulp3	O88413		mmu:22158	ko:K19600
ENSMUSG00000001524	4.817007072	4.813298908	4.538189626	5.033646496	5.03670973	4.961263868	4.805674573	4.881010522	4.703124868	5.027696156	4.474096665	4.904271664	4.507357875	4.890798622	5.142485648	4.373589285	4.802191339	4.776086254	4.933797185	4.954714102	general transcription factor II H polypeptide 4	GO:0004674/GO:0046483/GO:0044267/GO:0004672/GO:0031323/GO:0071704/GO:0018130/GO:0051716/GO:0044260/GO:0050789/GO:0008152/GO:0044798/GO:0044249/GO:0070816/GO:0050794/GO:0032806/GO:2000112/GO:0017111/GO:2001141/GO:0008150/GO:0019538/GO:0019222/GO:0009987/GO:0033554/GO:0008047/GO:0032774/GO:1990234/GO:0006974/GO:0016887/GO:0008094/GO:0000438/GO:0000439/GO:0032991/GO:0051171/GO:0006725/GO:0044271/GO:…	IBA/IEA/ISO	MF/BP/CC	PF03849/PF18307	Gtf2h4	Q542U3/O70422	path:mmu03022/path:mmu03420/path:mmu05203	mmu:14885	ko:K03144	Basal transcription factors - Mus musculus (house mouse)/Nucleotide excision repair - Mus musculus (house mouse)/Viral carcinogenesis - Mus musculus (house mouse)
ENSMUSG00000001525	9.39184796	9.550632788	9.317007086	9.425676959	9.732005675	9.51373332	9.538241562	9.491671432	9.439438984	9.593122984	9.097349363	9.297600428	9.766384318	9.190174014	9.677416141	9.625706603	9.322697674	9.339640529	9.788352894	9.256107619	tubulin beta 5 class I	GO:0042287/GO:0036464/GO:0003674/GO:0036094/GO:0042288/GO:0099513/GO:0016020/GO:0099512/GO:0097159/GO:0005200/GO:0000226/GO:0005874/GO:0001883/GO:0035770/GO:0110165/GO:0044389/GO:0043226/GO:0071944/GO:0050789/GO:0000280/GO:0099081/GO:0097367/GO:0035639/GO:0016043/GO:0050794/GO:0005856/GO:0016462/GO:0001882/GO:0050803/GO:0015630/GO:0008150/GO:1901265/GO:0005102/GO:0043227/GO:1901363/GO:0043229/GO:…	ISO/IBA/IDA/IEA/IMP/NAS	MF/CC/BP	PF03953/PF00091	Tubb5	P99024	path:mmu05022/path:mmu05014/path:mmu05020/path:mmu04540/path:mmu05012/path:mmu05132/path:mmu05016/path:mmu05010/path:mmu04145	mmu:22154	ko:K07375	Pathways of neurodegeneration - multiple diseases - Mus musculus (house mouse)/Amyotrophic lateral sclerosis - Mus musculus (house mouse)/Prion disease - Mus musculus (house mouse)/Gap junction - Mus musculus (house mouse)/Parkinson disease - Mus musculus (house mouse)/Salmonella infection - Mus musculus (house mouse)/Huntington disease - Mus musculus (house mouse)/Alzheimer disease - Mus musculu…
ENSMUSG00000001542	4.367520297	4.004469728	4.326647332	4.005761323	3.667977832	3.987980683	4.009321626	3.969711539	4.053496406	3.944082627	4.503640397	4.186371855	4.094773902	4.310651915	3.691867862	4.375382483	4.248194304	4.563904739	3.893999146	3.970194016	elongation factor RNA polymerase II 2	GO:1903508/GO:1901362/GO:0019219/GO:1902680/GO:1901576/GO:0019222/GO:1903506/GO:0080090/GO:0031325/GO:0043229/GO:0034645/GO:0019438/GO:0042795/GO:0032786/GO:1901360/GO:0008023/GO:0110165/GO:0043231/GO:0006357/GO:0098781/GO:0005622/GO:0032784/GO:0090304/GO:0010604/GO:0031328/GO:0009058/GO:0031326/GO:0097659/GO:0006368/GO:0043226/GO:0032991/GO:0006807/GO:0044249/GO:0043233/GO:0008152/GO:0050794/GO:…	ISO/IEA	BP/CC	PF07303/PF10390	Ell2	Q3UKU1	path:mmu03250	mmu:192657	ko:K15183	Viral life cycle - HIV-1 - Mus musculus (house mouse)
ENSMUSG00000001552	6.640910609	6.399900658	6.688664961	7.093040581	6.83313281	6.897081265	6.783537462	6.675854267	6.671843236	6.768868296	6.742360797	6.787635005	6.49740456	6.72028054	6.765464136	6.951614629	7.058531049	6.908876458	7.079466153	6.513585198	junction plakoglobin	GO:0042307/GO:0090257/GO:0042221/GO:0043226/GO:0003712/GO:0097306/GO:0070727/GO:0043227/GO:0070887/GO:0016020/GO:0003674/GO:0042886/GO:0006351/GO:0070201/GO:0086042/GO:0070161/GO:0006139/GO:0022610/GO:0071407/GO:0030048/GO:0071310/GO:0042493/GO:0015833/GO:0046824/GO:0086065/GO:0043228/GO:0043170/GO:0045785/GO:0005911/GO:0086003/GO:0086091/GO:0051094/GO:0086069/GO:0065009/GO:0070252/GO:0003015/GO:…	ISO/IEA/IDA/IBA/IMP/IPI	BP/CC/MF	PF00514	Jup	Q02257	path:mmu05226/path:mmu05202/path:mmu05221/path:mmu05200/path:mmu05412	mmu:16480	ko:K10056	Gastric cancer - Mus musculus (house mouse)/Transcriptional misregulation in cancer - Mus musculus (house mouse)/Acute myeloid leukemia - Mus musculus (house mouse)/Pathways in cancer - Mus musculus (house mouse)/Arrhythmogenic right ventricular cardiomyopathy - Mus musculus (house mouse)
ENSMUSG00000001555	4.007382928	4.904072911	4.329981828	5.210330045	3.837199196	4.340971689	4.349962132	4.601519038	4.02726273	4.417440649	4.707509242	4.812590544	4.291987996	5.016716215	4.532744259	3.696466177	4.680874275	4.761848069	4.32478746	4.867003687	FK506 binding protein 10	GO:0043226/GO:0044237/GO:0016853/GO:0006464/GO:0043227/GO:0043412/GO:0044260/GO:0005488/GO:0071704/GO:0008150/GO:0006807/GO:0008144/GO:0044267/GO:0046872/GO:0018208/GO:0043231/GO:0005886/GO:0044238/GO:0009987/GO:0016020/GO:0043169/GO:0018193/GO:0008152/GO:0043170/GO:0003824/GO:0110165/GO:0043229/GO:0097159/GO:0019538/GO:1901564/GO:0016859/GO:0012505/GO:0003755/GO:1901363/GO:0003674/GO:0005515/GO:…	IEA/IDA/TAS/IPI	CC/BP/MF	PF00254/PF13202	Fkbp10	Q61576/Q3UNJ3		mmu:14230	ko:K09575
ENSMUSG00000001566	2.416478313	2.232381442	2.556591003	2.049121095	2.251428537	2.252696306	2.057898536	2.475594582	2.735784406	2.864615343	1.840882232	1.859119237	2.218204027	1.918000576	2.482411752	3.077659331	1.910256969	2.191444103	2.542322062	1.959078874	motor neuron and pancreas homeobox 1	GO:0048663/GO:0097659/GO:0009987/GO:1901363/GO:1901362/GO:0120036/GO:0009653/GO:0031016/GO:2001141/GO:2000112/GO:0001708/GO:0001764/GO:0110165/GO:0010468/GO:0009792/GO:0030154/GO:0032990/GO:0070013/GO:0097159/GO:0009953/GO:0060255/GO:0032989/GO:1901576/GO:0031323/GO:0022008/GO:0009790/GO:1903506/GO:0009791/GO:0021953/GO:0031175/GO:0030182/GO:0097485/GO:0048513/GO:0016070/GO:0003002/GO:0031018/GO:…	IMP/IEA/IBA/IDA/ISO	BP/MF/CC	PF00046	Mnx1	A2RSX2	path:mmu04950	mmu:15285	ko:K08025	Maturity onset diabetes of the young - Mus musculus (house mouse)
ENSMUSG00000001576	6.148740231	6.180236035	5.991650807	6.362276141	6.239992188	5.963608451	6.051902691	6.183138735	6.102884244	6.289693267	6.351743146	6.405078023	6.191690288	6.213669195	6.443186295	6.482174836	6.183866726	6.301671234	6.102616489	6.425532989	endoplasmic reticulum-golgi intermediate compartment (ERGIC) 1	GO:0016192/GO:0043231/GO:0016021/GO:0012505/GO:0046907/GO:0016020/GO:0043226/GO:0005634/GO:0051641/GO:0031981/GO:0005737/GO:0051649/GO:0009987/GO:0031974/GO:0005654/GO:0043233/GO:0006888/GO:0031224/GO:0005793/GO:0008150/GO:0005575/GO:0110165/GO:0005773/GO:0043227/GO:0005622/GO:0071944/GO:0006890/GO:0043229/GO:0051179/GO:0005783/GO:0006810/GO:0070013/GO:0003674/GO:0005886/GO:0005794/GO:0051234/GO:…	IEA/IBA/ISO/ND	BP/CC/MF	PF07970/PF13850	Ergic1	Q4FK22/Q9DC16		mmu:67458	ko:K20365
ENSMUSG00000001604	3.957151035	4.017023214	4.170347234	4.780890347	3.901950295	4.036922329	3.539297126	4.298845079	3.883220742	3.729780684	3.964661468	4.027856508	3.271608517	4.250760544	4.524276423	3.94566917	4.569916508	4.508109796	3.91146209	4.552750128	transcription elongation factor A (SII) 3	GO:0032774/GO:0050794/GO:0019222/GO:0003677/GO:0005575/GO:0051171/GO:0003674/GO:0005634/GO:0031323/GO:0003676/GO:0110165/GO:0009987/GO:2000112/GO:0031326/GO:0005488/GO:0009889/GO:0010467/GO:0006139/GO:0060255/GO:0019438/GO:2001141/GO:0044271/GO:0046872/GO:0006355/GO:1901360/GO:0005622/GO:0065007/GO:0051252/GO:0010468/GO:0097659/GO:0009059/GO:0034654/GO:0043231/GO:0034641/GO:0046483/GO:0050789/GO:…	IEA/IDA	BP/MF/CC	PF07500/PF08711/PF01096	Tcea3	P23881		mmu:21401	ko:K03145
ENSMUSG00000001627	3.655517289	3.946720837	4.1659175	3.959316548	3.517195456	3.845163058	4.042916836	3.72298251	3.967645862	3.971866637	4.008601737	3.808692398	3.412880603	4.090770434	4.040794189	4.31725272	3.965685056	3.87723217	3.844762454	3.735519848	interferon-related developmental regulator 1	GO:0051171/GO:2000026/GO:0045926/GO:0045664/GO:0051090/GO:0019219/GO:0000902/GO:0000904/GO:0010604/GO:0065009/GO:0045595/GO:0031326/GO:0001558/GO:0022008/GO:0065007/GO:0050794/GO:0019222/GO:0061629/GO:1990138/GO:0031345/GO:0007399/GO:0050771/GO:0050896/GO:0018130/GO:0045665/GO:0019438/GO:0044238/GO:0006366/GO:1901360/GO:0007275/GO:0051091/GO:0050789/GO:0044260/GO:0044093/GO:1903508/GO:0031323/GO:…	ISO/IGI/IMP/IEA/IBA/IDA	BP/MF/CC	PF05004/PF04836	Ifrd1	P19182		mmu:15982
ENSMUSG00000001630	3.965455763	4.017247783	3.434379892	4.017742534	3.572106059	3.760688182	3.787242111	3.581580767	4.062068275	3.841837623	3.726977913	3.660715736	3.823697516	3.751458606	4.044327721	3.902359661	3.52525589	3.77966658	3.056060075	3.579183219	serine/threonine kinase 38 like	GO:0004674/GO:0044237/GO:0006468/GO:0044238/GO:0097159/GO:0050794/GO:0035556/GO:0005856/GO:0006793/GO:0071840/GO:0006464/GO:0032559/GO:0004672/GO:0043226/GO:0043412/GO:0003824/GO:0043228/GO:0032553/GO:0016310/GO:0016301/GO:0035639/GO:0003779/GO:0043229/GO:0050789/GO:0000287/GO:0016772/GO:0032555/GO:0046872/GO:0000166/GO:0043232/GO:0019538/GO:0036094/GO:0043167/GO:0008152/GO:0008150/GO:0065007/GO:…	IBA/ISO/IEA/IDA	MF/BP/CC	PF00433/PF00069	Stk38l	Q7TSE6		mmu:232533	ko:K08790
ENSMUSG00000001632	5.348433035	5.111273887	5.249314792	5.125033108	5.36418431	5.271195458	4.850618769	5.395945993	5.247190108	5.103924866	4.762136786	5.31026092	5.058251442	4.93206039	5.190270883	5.344608445	4.953227606	5.197965482	5.520972194	5.380420636	bromodomain and PHD finger containing 1	GO:0006996/GO:0007399/GO:0010557/GO:0006473/GO:0035295/GO:0007275/GO:0036211/GO:0110165/GO:0035239/GO:1901360/GO:0048598/GO:0016020/GO:0010604/GO:1901362/GO:0042127/GO:0045893/GO:0006464/GO:0010628/GO:0071840/GO:0048522/GO:0035148/GO:0048646/GO:0044271/GO:0072175/GO:0006807/GO:0016407/GO:0016570/GO:0072358/GO:0016331/GO:0044267/GO:0048518/GO:0006475/GO:0006725/GO:0046483/GO:0016043/GO:0043412/GO:…	IMP/ISO/IEA	BP/CC/MF	PF10513/PF00855/PF00439	Brpf1	B2RRD7/A0A0N4SUS4/Q8C905/Q80XK2/A0A0N4SUT9/A0A0N4SVG7/E9PXP1/Q3U109/Q9CTY1		mmu:78783	ko:K11348
ENSMUSG00000001642	1.762666986	1.568732657	1.763350995	1.877022635	1.521422119	1.522848549	1.439795909	1.637282589	1.788335869	1.756504173	1.741513012	1.946487911	1.698449335	1.842571358	1.475849954	1.490191603	1.595208674	1.462725931	1.482952252	1.55310413	aldo-keto reductase family 1 member B3 (aldose reductase)	GO:0008106/GO:0050794/GO:0044598/GO:0046165/GO:0048513/GO:0016491/GO:0010033/GO:0050878/GO:0052650/GO:0016137/GO:0006807/GO:0048471/GO:0001655/GO:0055114/GO:0009651/GO:0046173/GO:0072001/GO:0016614/GO:0010035/GO:0065008/GO:0047655/GO:0046677/GO:0009987/GO:0044283/GO:0044597/GO:0070301/GO:0046425/GO:0046427/GO:0065007/GO:0007275/GO:0006721/GO:0050896/GO:0000323/GO:0050789/GO:0062197/GO:0009414/GO:…	IDA/ISO/IMP/IEA/IBA	MF/BP/CC	PF00248	Akr1b3	Q3UDY1/P45376	path:mmu00561/path:mmu01100/path:mmu00051/path:mmu00790/path:mmu00052/path:mmu00040	mmu:11677	ko:K00011	Glycerolipid metabolism - Mus musculus (house mouse)/Metabolic pathways - Mus musculus (house mouse)/Fructose and mannose metabolism - Mus musculus (house mouse)/Folate biosynthesis - Mus musculus (house mouse)/Galactose metabolism - Mus musculus (house mouse)/Pentose and glucuronate interconversions - Mus musculus (house mouse)
ENSMUSG00000001655	-0.077873591	0.16816319	-0.376342622	-0.364422022	-0.373884149	-0.358827197	0.01086143	-0.374020646	-0.355790375	-0.329364752	-0.347150794	-0.326183296	-0.327565314	-0.33262165	-0.28289111	-0.273487929	-0.31463325	-0.327428345	-0.322994805	-0.324733468	homeobox C13	GO:0019222/GO:0008150/GO:0005634/GO:0008152/GO:0097159/GO:0043226/GO:0003690/GO:0019219/GO:0019438/GO:0090304/GO:0018130/GO:0007389/GO:0031323/GO:0003700/GO:0022404/GO:0022405/GO:0005622/GO:0051171/GO:0051173/GO:0044212/GO:0005488/GO:0110165/GO:0044249/GO:0000976/GO:0043170/GO:2001141/GO:0044238/GO:2000112/GO:0042633/GO:0003674/GO:0035878/GO:1901576/GO:1903506/GO:0000977/GO:0080090/GO:0001012/GO:…	IDA/IEA/IMP	BP/CC/MF	PF12284/PF00046	Hoxc13	P50207		mmu:15422	ko:K09298
ENSMUSG00000001656	3.246232774	4.002910044	3.69677054	2.751135526	3.660903411	2.779460036	4.293548909	4.285694014	3.205498508	4.143868215	2.847134705	3.199194971	4.654779164	2.767690303	3.021190404	3.062815623	2.82322765	3.430706	4.019788681	3.281367376	homeobox C11	GO:0034654/GO:0009059/GO:0035108/GO:0009889/GO:0035113/GO:0009954/GO:0006807/GO:0009952/GO:0009653/GO:0042733/GO:0009058/GO:0000981/GO:0000978/GO:0051240/GO:0051239/GO:0048522/GO:0043170/GO:0032501/GO:0048568/GO:0007154/GO:0048513/GO:0043009/GO:0051171/GO:0050794/GO:0000976/GO:0009891/GO:0051252/GO:0016070/GO:0009790/GO:0031328/GO:0048518/GO:0018130/GO:0009792/GO:0051173/GO:0009893/GO:0031981/GO:…	ISO/IGI/IEA	BP/MF/CC	PF12045/PF00046	Hoxc11	P31313		mmu:109663	ko:K09296
ENSMUSG00000001657	6.51835662	5.048120234	6.248716711	6.096281956	6.098546462	6.494235191	5.624662113	6.055296657	6.560255704	5.840221317	6.264721219	5.893436633	5.387671924	6.249620371	6.05219869	6.583839359	6.200780702	5.831801374	5.676033744	5.573555231	homeobox C8	GO:0005488/GO:0031981/GO:0048523/GO:0032502/GO:0009059/GO:0048705/GO:0003002/GO:0000122/GO:0048513/GO:0044237/GO:0034641/GO:0046483/GO:0097659/GO:0005575/GO:0031326/GO:0019219/GO:0097159/GO:0032501/GO:0110165/GO:0019438/GO:0030154/GO:0045892/GO:0044238/GO:0031327/GO:0001501/GO:0031323/GO:0010558/GO:0010468/GO:0000976/GO:0045934/GO:0044260/GO:0001067/GO:0003674/GO:2001141/GO:1990837/GO:0031324/GO:…	IEA/ISO/IDA/IGI/IMP	MF/CC/BP	PF00046	Hoxc8	P09025		mmu:15426	ko:K09308
ENSMUSG00000001661	5.604995102	5.330955746	5.664285756	5.912704775	5.793609331	5.800384521	5.349180224	5.537763383	5.755494203	5.644164577	5.533714597	5.995481987	5.398796114	5.512549869	6.066320123	5.91855688	5.9811818	5.268162765	5.772372939	5.633237729	homeobox C6	GO:0031323/GO:0005622/GO:0008152/GO:0008150/GO:0010556/GO:1901362/GO:0043231/GO:0007389/GO:0005634/GO:0009987/GO:0070013/GO:0097159/GO:0110165/GO:0009952/GO:0043170/GO:1901576/GO:0032501/GO:0034641/GO:0003676/GO:0032502/GO:0140110/GO:0071704/GO:0097659/GO:1990837/GO:0034654/GO:0031981/GO:0043233/GO:0034645/GO:0044260/GO:0007275/GO:0005575/GO:0090304/GO:0080090/GO:0060255/GO:0050789/GO:0006725/GO:…	IEA/ISO/IBA/IGI	BP/CC/MF	PF00046	Hoxc6	P10629/B2RUB8/Q543H4		mmu:15425	ko:K09306
ENSMUSG00000001663	5.026898014	5.359352625	4.920843117	5.028251965	5.292101909	5.228011049	4.991352353	5.092970253	4.990334817	5.240716334	4.812147164	5.119781222	5.076209841	4.812240192	5.147582488	5.09537116	5.233798541	4.877762844	5.162889367	4.865529079	glutathione S-transferase theta 1	GO:0043603/GO:0006725/GO:1901360/GO:0006518/GO:0006575/GO:0071704/GO:0043170/GO:0006807/GO:0006259/GO:0006749/GO:0043227/GO:0005634/GO:0043412/GO:0043231/GO:0110165/GO:0044237/GO:0043229/GO:0005622/GO:0034641/GO:0005829/GO:0046483/GO:0043226/GO:1901564/GO:0003824/GO:0044238/GO:0016740/GO:0090304/GO:0005737/GO:0051186/GO:0005575/GO:0004602/GO:0006304/GO:0016787/GO:0019120/GO:0004364/GO:0006790/GO:…	IMP/ISO/IDA/IBA/IEA	BP/CC/MF	PF00043/PF02798	Gstt1	Q64471/Q9DCY6	path:mmu05207/path:mmu00980/path:mmu05208/path:mmu01524/path:mmu05225/path:mmu05200/path:mmu00480/path:mmu01100/path:mmu05204/path:mmu00982/path:mmu05418/path:mmu00983	mmu:14871	ko:K00799	Chemical carcinogenesis - receptor activation - Mus musculus (house mouse)/Metabolism of xenobiotics by cytochrome P450 - Mus musculus (house mouse)/Chemical carcinogenesis - reactive oxygen species - Mus musculus (house mouse)/Platinum drug resistance - Mus musculus (house mouse)/Hepatocellular carcinoma - Mus musculus (house mouse)/Pathways in cancer - Mus musculus (house mouse)/Glutathione met…
ENSMUSG00000001665	5.089333963	5.510316919	4.646613288	4.88042054	5.355705776	5.095511964	5.197740421	4.946743812	5.478822088	5.490868133	4.931036641	4.97437421	5.14379222	5.027746548	5.925593454	5.739342754	5.106933386	4.646990434	5.398643037	5.204604679	glutathione S-transferase theta 3	GO:0071704/GO:0005622/GO:0043603/GO:0005737/GO:0003824/GO:0004364/GO:0005575/GO:0009987/GO:0006749/GO:0006807/GO:0008152/GO:1901564/GO:0044237/GO:0016740/GO:0006518/GO:0006790/GO:0051186/GO:0110165/GO:0006575/GO:0008150/GO:0003674/GO:0016765/GO:0034641	IDA/IEA/IBA	BP/CC/MF	PF00043/PF02798	Gstt3	Q99L20/G3UX05	path:mmu05208/path:mmu01100/path:mmu05207/path:mmu00982/path:mmu05200/path:mmu05204/path:mmu05225/path:mmu00480/path:mmu00980/path:mmu01524/path:mmu05418/path:mmu00983	mmu:103140	ko:K00799	Chemical carcinogenesis - reactive oxygen species - Mus musculus (house mouse)/Metabolic pathways - Mus musculus (house mouse)/Chemical carcinogenesis - receptor activation - Mus musculus (house mouse)/Drug metabolism - cytochrome P450 - Mus musculus (house mouse)/Pathways in cancer - Mus musculus (house mouse)/Chemical carcinogenesis - DNA adducts - Mus musculus (house mouse)/Hepatocellular carc…
ENSMUSG00000001666	7.898043281	7.697869947	7.610683585	7.458194749	7.917620121	7.80970264	7.842253656	7.963401521	7.625889016	7.948025872	7.649639368	7.780649851	8.089064861	7.500222715	7.989730452	7.739459857	7.640900108	7.784977962	7.914191165	7.615381841	D-dopachrome tautomerase	GO:0044267/GO:0042440/GO:0031399/GO:0043408/GO:0045937/GO:0016853/GO:0001817/GO:0001816/GO:0019222/GO:0044260/GO:0019438/GO:0031349/GO:0044237/GO:0043410/GO:0031401/GO:0043170/GO:0019220/GO:0016862/GO:0023052/GO:0018958/GO:0040013/GO:0001934/GO:0042327/GO:0023051/GO:0030334/GO:0030595/GO:0023014/GO:0042221/GO:0046189/GO:0042330/GO:0042325/GO:0044238/GO:0001932/GO:0019899/GO:0035556/GO:0002683/GO:…	ISO/IEA/IMP/IPI/IDA	BP/MF/CC	PF01187	Ddt	Q3UNI8/O35215		mmu:13202	ko:K10028
ENSMUSG00000001674	4.649283671	4.598648876	4.685192178	4.772721251	4.273185019	4.482759945	4.482349759	4.585536836	4.427169609	4.704823489	4.684269051	4.671832839	4.022637342	4.696986085	4.193907378	4.410252515	4.892030359	4.706256725	4.782917873	4.829214598	DEAD (Asp-Glu-Ala-Asp) box polypeptide 18	GO:0043227/GO:0043168/GO:0043226/GO:0043170/GO:0005622/GO:0043231/GO:0008150/GO:0032555/GO:0043233/GO:0016818/GO:0043232/GO:0043228/GO:0032559/GO:0032553/GO:0003824/GO:0008144/GO:0016887/GO:0016817/GO:0043229/GO:0097367/GO:0070013/GO:0005524/GO:0008152/GO:0031974/GO:0016787/GO:0009987/GO:0016070/GO:0016462/GO:0017076/GO:0003724/GO:0016072/GO:0046483/GO:0031981/GO:0110165/GO:0003674/GO:0003723/GO:…	IEA/IBA/ISO	CC/MF/BP	PF00271/PF00270/PF13959	Ddx18	B2RUM8/Q8K363		mmu:66942	ko:K13179
ENSMUSG00000001687	8.752318464	8.577636714	8.774522065	8.815142786	8.778380923	8.793202587	8.699085551	8.589545419	8.860422193	8.649061992	8.686181007	8.745480944	8.61227051	8.905049248	8.711185681	8.721557698	8.788545402	8.712403278	8.863159348	8.695498442	ubiquitin-like 3	GO:0005575/GO:0071944/GO:0003674/GO:0005886/GO:0110165/GO:0005622/GO:0016020/GO:0008150	ISO/IEA/ND	CC/MF/BP	PF13881	Ubl3	Q9Z2M6		mmu:24109
ENSMUSG00000001700	4.596736933	4.607638741	4.75540581	4.711452209	4.520786185	5.138101749	4.675819194	4.782943486	4.845671572	4.600651985	5.055836126	4.974660592	4.49117842	5.013996842	4.672508369	4.999611183	5.086454646	4.736378722	4.407374328	4.870446494	GRAM domain containing 3	GO:0099512/GO:0043226/GO:0005488/GO:0015630/GO:0005515/GO:0099081/GO:0099080/GO:0005575/GO:0005874/GO:0008150/GO:0043229/GO:0043228/GO:0043232/GO:0005622/GO:0005737/GO:0003674/GO:0042802/GO:0099513/GO:0110165/GO:0005881/GO:0005856	ISO/ND	CC/MF/BP	PF02893	Gramd3	Q9D2W5
ENSMUSG00000001707	-0.074352786	0.034550598	0.099101667	0.054728268	0.214876768	-0.042150582	0.093162385	0.029901079	0.053729945	-0.054202901	-0.001746888	-0.054401138	0.043144933	0.02667582	-0.012106354	0.124441218	0.160756032	0.124047245	-0.047513903	0.042266514	eukaryotic translation elongation factor 1 epsilon 1	GO:0044267/GO:0080135/GO:0048518/GO:0006950/GO:0048519/GO:0090343/GO:0072331/GO:0071345/GO:0005575/GO:0005737/GO:0080134/GO:0005515/GO:0070013/GO:0065007/GO:0051716/GO:0005488/GO:0005634/GO:0090342/GO:0006518/GO:0010033/GO:0010942/GO:0048522/GO:0005829/GO:0006915/GO:0070887/GO:0071704/GO:0034097/GO:0017101/GO:0044271/GO:0006412/GO:0044260/GO:0009987/GO:0050794/GO:0050896/GO:0051094/GO:0031974/GO:…	IEA/ISO/IMP/IDA/IEP/IPI/NAS	BP/CC/MF	PF00043	Eef1e1	Q9D1M4		mmu:66143	ko:K15439
ENSMUSG00000001729	8.285310308	8.511597506	8.134815734	8.522814023	8.564259958	8.224106252	8.206354826	8.463466407	8.174556705	8.253114142	8.1355831	8.356440768	8.236430635	8.32444972	8.536219101	8.704209294	8.40980939	8.346158011	8.474933031	8.502777649	thymoma viral proto-oncogene 1	GO:0010941/GO:0003674/GO:0051234/GO:0034641/GO:0003824/GO:2000145/GO:0097305/GO:0040012/GO:0051239/GO:0043255/GO:0040011/GO:2000116/GO:0046209/GO:0010632/GO:0040007/GO:0051235/GO:0008219/GO:0010631/GO:0010565/GO:0010594/GO:0044085/GO:0140096/GO:0004672/GO:0010918/GO:2000117/GO:0097367/GO:0010629/GO:0010907/GO:0140212/GO:0010942/GO:0014037/GO:0043325/GO:0001568/GO:0097194/GO:0044093/GO:0071495/GO:…	ISO/IDA/EXP/IMP/IGI/IPI/IEA/IBA/TAS	BP/MF/CC	PF00069/PF00169/PF00433	Akt1	P31750	path:mmu05167/path:mmu04072/path:mmu05418/path:mmu04218/path:mmu04010/path:mmu04932/path:mmu04611/path:mmu05230/path:mmu05169/path:mmu05214/path:mmu05226/path:mmu04151/path:mmu04012/path:mmu05010/path:mmu04973/path:mmu05210/path:mmu04140/path:mmu05415/path:mmu04014/path:mmu05417/path:mmu04015/path:mmu04071/path:mmu04022/path:mmu04933/path:mmu05145/path:mmu05170/path:mmu05212/path:mmu04919/path:mm…	mmu:11651	ko:K04456	Kaposi sarcoma-associated herpesvirus infection - Mus musculus (house mouse)/Phospholipase D signaling pathway - Mus musculus (house mouse)/Fluid shear stress and atherosclerosis - Mus musculus (house mouse)/Cellular senescence - Mus musculus (house mouse)/MAPK signaling pathway - Mus musculus (house mouse)/Non-alcoholic fatty liver disease - Mus musculus (house mouse)/Platelet activation - Mus m…
ENSMUSG00000001741	1.722006615	1.935935638	1.616068796	2.14661941	1.58481888	1.754577571	1.928191541	1.707461891	1.779245491	1.489096541	1.760805542	1.827942206	1.759960522	1.987647969	1.734465091	1.996228064	1.814125517	1.893207669	1.606842239	2.175166973	interleukin 16	GO:0040011/GO:0005576/GO:0031012/GO:0032103/GO:0070013/GO:0006810/GO:0072511/GO:0042221/GO:0050900/GO:0009605/GO:0031981/GO:0016607/GO:0043269/GO:0065007/GO:0005575/GO:0006811/GO:0042330/GO:0050918/GO:0050920/GO:0040012/GO:0005737/GO:0016477/GO:0048870/GO:0070838/GO:0050896/GO:0043229/GO:0006812/GO:0071944/GO:0050789/GO:0032879/GO:0005615/GO:0048584/GO:0031974/GO:0048583/GO:0006935/GO:0048018/GO:…	IDA/HDA/IEA/IBA/ISO/IPI	BP/CC/MF	PF00595	Il16	O54824	path:mmu04060	mmu:16170	ko:K22628	Cytokine-cytokine receptor interaction - Mus musculus (house mouse)
ENSMUSG00000001750	4.359772116	4.931044056	4.658883565	5.321811338	4.207081758	3.901690753	4.118644957	4.90739096	4.38652912	4.141933093	4.873987702	4.841745372	3.764358955	4.702619355	4.080105363	4.591354447	5.317164071	4.767028426	3.99143468	4.967563861	T cell immune regulator 1 ATPase H+ transporting lysosomal V0 protein A3	GO:0005575/GO:0048856/GO:0048872/GO:0055085/GO:0016020/GO:0015075/GO:0071944/GO:0016469/GO:0016043/GO:0005488/GO:0012506/GO:0006807/GO:1901564/GO:0015833/GO:0010468/GO:0005515/GO:0002460/GO:0046879/GO:0015672/GO:0005774/GO:0010817/GO:0032502/GO:0010155/GO:0042221/GO:0048869/GO:0055082/GO:0030183/GO:0030154/GO:0048731/GO:0046883/GO:0001775/GO:0016236/GO:0002520/GO:0019538/GO:0006873/GO:0010467/GO:…	HDA/IMP/ISO/IBA/IDA	CC/BP/MF	PF01496	Tcirg1	Q9JHF5	path:mmu04145/path:mmu04142/path:mmu00190/path:mmu05323/path:mmu04721/path:mmu05165/path:mmu04966/path:mmu01100/path:mmu05152	mmu:27060	ko:K02154	Phagosome - Mus musculus (house mouse)/Lysosome - Mus musculus (house mouse)/Oxidative phosphorylation - Mus musculus (house mouse)/Rheumatoid arthritis - Mus musculus (house mouse)/Synaptic vesicle cycle - Mus musculus (house mouse)/Human papillomavirus infection - Mus musculus (house mouse)/Collecting duct acid secretion - Mus musculus (house mouse)/Metabolic pathways - Mus musculus (house mous…
ENSMUSG00000001751	4.294771272	5.358324707	5.414566062	6.215746301	4.862952747	4.646182625	4.398257732	4.81612786	4.357562988	4.418474502	6.135943962	5.485474574	4.269867284	6.10849148	4.866010695	4.845836021	5.96196191	5.602490321	4.618336734	5.824976233	alpha-N-acetylglucosaminidase (Sanfilippo disease IIIB)	GO:0009653/GO:0048593/GO:0048511/GO:0048598/GO:0016043/GO:0048468/GO:0048512/GO:0015929/GO:0048513/GO:0016787/GO:0009790/GO:0046548/GO:0005615/GO:0048731/GO:0032502/GO:0022008/GO:0032501/GO:1903561/GO:0009887/GO:0009987/GO:0048839/GO:0005575/GO:0080171/GO:0021680/GO:0043226/GO:0022037/GO:0110165/GO:0042471/GO:0005576/GO:0030902/GO:0042490/GO:0007420/GO:0031982/GO:0090596/GO:0060221/GO:0150063/GO:…	IMP/IEA/ISO	BP/MF/CC	PF12972/PF05089/PF12971	Naglu	O88325	path:mmu00531/path:mmu04142/path:mmu01100	mmu:27419	ko:K01205	Glycosaminoglycan degradation - Mus musculus (house mouse)/Lysosome - Mus musculus (house mouse)/Metabolic pathways - Mus musculus (house mouse)
ENSMUSG00000001755	5.403039491	5.615443737	5.205062521	5.509514864	5.46376954	5.365438782	5.546766517	5.539576446	5.308465032	5.192023504	5.580249857	5.629205583	5.450165649	5.451161875	5.547109277	5.152245102	5.535083018	5.780555605	5.579118752	5.225406175	Coenzyme A synthase	GO:0016740/GO:0008152/GO:0016772/GO:1901564/GO:1901566/GO:0016779/GO:0008150/GO:0006725/GO:1901363/GO:0090407/GO:0017076/GO:0006732/GO:0072522/GO:0006753/GO:1901360/GO:0044237/GO:0097159/GO:0044249/GO:0006807/GO:0003674/GO:0072521/GO:0008144/GO:0018130/GO:0097367/GO:0043226/GO:0110165/GO:0006163/GO:1901362/GO:0044238/GO:0043227/GO:0070566/GO:0071704/GO:0009165/GO:0016310/GO:1901293/GO:0044271/GO:…	IDA/ISO/IBA/IEA/IMP	MF/BP/CC	PF01121/PF01467	Coasy	Q9DBL7	path:mmu01100/path:mmu01240/path:mmu00770	mmu:71743	ko:K02318	Metabolic pathways - Mus musculus (house mouse)/Biosynthesis of cofactors - Mus musculus (house mouse)/Pantothenate and CoA biosynthesis - Mus musculus (house mouse)
ENSMUSG00000001761	5.264094216	5.575828432	5.431219151	5.615142287	4.997195923	5.120894019	5.30116773	5.257185319	5.256401875	5.230081375	5.263372333	5.285492095	5.494628058	5.453200352	5.232442451	5.597773897	5.48232242	5.67049508	4.969275979	5.267453645	smoothened frizzled class receptor	GO:0040008/GO:0040007/GO:1904754/GO:0090189/GO:0050896/GO:0050678/GO:0004930/GO:0010646/GO:0032502/GO:0001657/GO:0090184/GO:0090087/GO:0004888/GO:0010941/GO:0040011/GO:0090183/GO:0038023/GO:0072594/GO:0005622/GO:0001656/GO:0010720/GO:0050679/GO:0050821/GO:0072359/GO:0080090/GO:0035883/GO:0097305/GO:0090304/GO:0003674/GO:0098590/GO:0051451/GO:0010647/GO:0070723/GO:0001655/GO:0005634/GO:0045165/GO:…	IMP/ISO/IGI/IEA/IBA/IDA/IEP/IPI	BP/MF/CC	PF01534/PF01392	Smo	Q8BJN8/P56726/Q4VBD5	path:mmu05200/path:mmu05205/path:mmu05217/path:mmu04360/path:mmu04340	mmu:319757	ko:K06226	Pathways in cancer - Mus musculus (house mouse)/Proteoglycans in cancer - Mus musculus (house mouse)/Basal cell carcinoma - Mus musculus (house mouse)/Axon guidance - Mus musculus (house mouse)/Hedgehog signaling pathway - Mus musculus (house mouse)
ENSMUSG00000001763	5.431676546	5.089596538	5.213436865	4.992513938	5.610541443	5.033262914	5.058465417	5.45665555	5.319406405	5.464818364	4.909138343	5.316333352	5.033810311	4.957544798	4.994190417	5.536603856	5.120932776	5.130288162	5.77692433	5.050653919	tetraspanin 33	GO:0031224/GO:0065003/GO:0071704/GO:0031226/GO:0043933/GO:0071944/GO:0070727/GO:0019538/GO:0071840/GO:0051641/GO:0098796/GO:0019899/GO:0016020/GO:0044085/GO:0005575/GO:0022607/GO:0010467/GO:0032991/GO:1990778/GO:0072659/GO:0051179/GO:0110165/GO:0072657/GO:0044238/GO:0033036/GO:0051604/GO:0016021/GO:1901564/GO:0034613/GO:0043170/GO:0006807/GO:0005488/GO:0046931/GO:0008150/GO:0016043/GO:0005887/GO:…	IBA/IMP/ISO/IDA/IPI/IEA	CC/BP/MF	PF00335	Tspan33	Q8R3S2		mmu:232670	ko:K17346
ENSMUSG00000001767	3.949795215	3.613318682	3.869527373	4.025880672	3.48032588	4.021842322	3.93524279	3.917692091	4.143068799	4.005355378	3.950829483	3.666887042	3.781821046	4.052681947	3.738036763	3.326535923	3.758157383	4.096674578	4.057997749	3.950917606	crooked neck pre-mRNA splicing factor 1	GO:0110165/GO:1902494/GO:0000398/GO:0071007/GO:0071014/GO:0065003/GO:1990904/GO:0008380/GO:0044238/GO:0000377/GO:0043231/GO:0005681/GO:0046483/GO:0043170/GO:0071704/GO:0000245/GO:0005575/GO:0071013/GO:0006807/GO:0000375/GO:0043227/GO:0071840/GO:0005634/GO:0090304/GO:1901363/GO:0009987/GO:0016070/GO:0010467/GO:0043229/GO:0006725/GO:0006139/GO:0043933/GO:0003674/GO:0005488/GO:0000974/GO:0003723/GO:…	IBA/ISO/IEA	CC/BP/MF	PF02184	Crnkl1	P63154	path:mmu03040	mmu:66877	ko:K12869	Spliceosome - Mus musculus (house mouse)
ENSMUSG00000001768	4.355225945	4.103261963	4.673694431	4.320407377	3.895723787	4.310796329	4.507005258	4.183723987	4.43525943	3.843840769	4.623165149	4.127235556	4.011171125	4.739373988	4.087402804	4.30927964	4.339487285	4.461810489	3.436410193	4.228120652	Ras and Rab interactor 2/cDNA sequence BC039771	GO:0016462/GO:0008150/GO:0007165/GO:0016192/GO:0007154/GO:0003674/GO:0005096/GO:0003924/GO:0016818/GO:0016043/GO:0008047/GO:0006996/GO:0071840/GO:0003824/GO:0005575/GO:0016787/GO:0016050/GO:0050896/GO:0009987/GO:0051716/GO:0005622/GO:0051234/GO:0016817/GO:0050789/GO:0051179/GO:0005737/GO:0060589/GO:0110165/GO:0006897/GO:0006900/GO:0006810/GO:0010324/GO:0017111/GO:0050794/GO:0023052/GO:0061024/GO:…	IEA/ND	MF/BP/CC	PF02204/PF00788	Rin2/BC039771	F8WGD2/Q9D684		mmu:74030	ko:K23687
ENSMUSG00000001773	2.536925723	2.974054069	2.801636891	2.665970658	2.810011607	2.886740615	2.540721043	2.832264963	2.857340715	2.871243993	3.183924946	2.572175235	2.647144093	2.865552865	2.66366173	2.995357082	2.930007853	2.86473238	2.683489927	2.890897408	folate hydrolase 1	GO:0005886/GO:0005575/GO:0043603/GO:0008233/GO:0044237/GO:0008150/GO:0019538/GO:0006508/GO:0031224/GO:0006082/GO:1901564/GO:0048522/GO:0044238/GO:0046483/GO:0005887/GO:0048518/GO:0031226/GO:0003674/GO:0016020/GO:0070011/GO:0043170/GO:0050789/GO:0008152/GO:0065007/GO:0043436/GO:0019752/GO:0016805/GO:0051186/GO:0012501/GO:0046872/GO:0110165/GO:0016021/GO:0050794/GO:0008219/GO:0140096/GO:0043068/GO:…	IDA/IEA/ISO/IBA	CC/BP/MF	PF02225/PF04389/PF04253	Folh1	O35409/Q0VDM6	path:mmu00250/path:mmu04977/path:mmu01100	mmu:53320	ko:K14592	Alanine aspartate and glutamate metabolism - Mus musculus (house mouse)/Vitamin digestion and absorption - Mus musculus (house mouse)/Metabolic pathways - Mus musculus (house mouse)
ENSMUSG00000001774	4.553855481	4.305203335	4.50707167	4.07023801	4.477614607	4.569072152	4.459109946	4.371573787	4.53426362	4.111248732	4.195805856	4.667031934	4.533054771	4.166572493	4.442903954	4.250594085	4.391370965	4.16609225	4.362676803	4.164075646	cysteine and histidine-rich domain (CHORD)-containing zinc-binding protein 1	GO:0006793/GO:0043549/GO:0051879/GO:0033554/GO:0080090/GO:0035639/GO:0036211/GO:0071901/GO:0006796/GO:0051348/GO:0051716/GO:0033673/GO:0033043/GO:0046872/GO:0043531/GO:0048519/GO:0071840/GO:0044092/GO:0065007/GO:0046914/GO:0006457/GO:0043412/GO:0032553/GO:0016043/GO:0006807/GO:0016310/GO:0010564/GO:0010605/GO:0008150/GO:0032268/GO:0005515/GO:0051298/GO:0061077/GO:0048523/GO:0003674/GO:0010824/GO:…	IDA/ISO/IMP/IEA/IPI	BP/MF	PF04969/PF04968	Chordc1	Q9D1P4		mmu:66917	ko:K16729
ENSMUSG00000001783	7.801443933	8.053807531	7.80473525	7.926030303	7.897431737	7.869627778	7.996610381	8.08360004	7.803896623	7.856659174	8.034906899	7.967530833	8.074980736	7.929296034	7.851585681	7.75346449	7.906214896	8.017143805	8.008476065	7.737769238	RNA 2' 3'-cyclic phosphate and 5'-OH ligase	GO:0003674/GO:0005622/GO:0016874/GO:0072669/GO:0090304/GO:0001890/GO:0061458/GO:0071704/GO:0097367/GO:0110165/GO:0000394/GO:0048513/GO:0097159/GO:0008380/GO:0048608/GO:0003006/GO:0008033/GO:0071944/GO:0070013/GO:0016886/GO:0000968/GO:0006807/GO:0007275/GO:0008144/GO:0046872/GO:0036094/GO:0034641/GO:0034660/GO:0016070/GO:0017076/GO:0012505/GO:0034470/GO:0048856/GO:0032991/GO:0008150/GO:0005575/GO:…	IEA/IDA/IBA/ISO/IMP	MF/CC/BP	PF01139	Rtcb	Q99LF4		mmu:28088	ko:K14415
ENSMUSG00000001785	5.143419378	5.22480518	4.995761285	4.692874465	4.832055604	5.257574641	4.946032628	4.718237248	4.910732239	4.647866048	5.268149059	5.05334364	5.109847419	4.666071713	5.021928801	4.644204504	5.296656352	5.21330052	5.195932365	5.055187255	PWP1 homolog endonuclein	GO:0051174/GO:0045943/GO:0051254/GO:0006360/GO:0019220/GO:0051276/GO:0051252/GO:0005622/GO:0048583/GO:0019222/GO:0006325/GO:0044237/GO:0006355/GO:0045597/GO:0045936/GO:0035064/GO:0005886/GO:0044249/GO:0046425/GO:0006139/GO:0044085/GO:0003674/GO:0044271/GO:0051171/GO:0006351/GO:0044260/GO:0044238/GO:0010468/GO:0034654/GO:0051248/GO:0045595/GO:0006468/GO:0019219/GO:0005575/GO:0048522/GO:0044267/GO:…	IMP/ISO/IEA/IDA/IBA	BP/CC/MF	PF00400	Pwp1	Q99LL5		mmu:103136	ko:K14791
ENSMUSG00000001786	6.252253718	6.403948511	5.763426949	6.3975193	6.313853922	6.285519372	6.464753515	5.946522108	6.170864061	6.147431671	6.280024934	6.406726626	6.280555393	6.158294603	6.27407281	6.114617258	6.210243626	6.363469597	6.252780131	6.006138179	F-box protein 7	GO:0042221/GO:0051250/GO:0042325/GO:0071236/GO:0040012/GO:0031323/GO:1990038/GO:0040011/GO:0050896/GO:0008150/GO:1903146/GO:0071705/GO:0043229/GO:0071704/GO:1904029/GO:0050866/GO:1904030/GO:0036476/GO:0045596/GO:0048522/GO:0030182/GO:0009894/GO:0043227/GO:0051239/GO:0009987/GO:0048523/GO:0048513/GO:0050865/GO:0009893/GO:0051249/GO:0019901/GO:0006996/GO:0048519/GO:0048518/GO:1903047/GO:0009896/GO:…	IBA/IGI/IMP/ISO/IDA/IPI	BP/CC/MF	PF12937/PF11566	Fbxo7	Q3UGI9/Q3UD93/Q3U7U3		mmu:69754	ko:K10293
ENSMUSG00000001794	9.251196396	9.692817182	9.400404143	10.00340489	9.436158599	9.121935732	9.369464309	9.529790774	9.224153157	9.411146143	9.428103223	9.709666647	9.208915411	9.971862818	9.670184518	9.305783012	9.681382567	9.848319474	9.57863604	9.702235649	calpain small subunit 1	GO:0004198/GO:0046872/GO:0005515/GO:0005737/GO:0003674/GO:0005488/GO:0003824/GO:0005622/GO:0046982/GO:0140096/GO:0004197/GO:0005575/GO:0004175/GO:0008234/GO:0005829/GO:0016787/GO:0043167/GO:0070011/GO:0008233/GO:0043169/GO:0005886/GO:0016020/GO:0005509/GO:0110165/GO:0071944/GO:0046983	IMP/IEA/IPI/ISO	MF/CC		Capns1	A0A0R4IZW8/O88456		mmu:12336	ko:K08583
ENSMUSG00000001802	6.221000139	5.852690721	5.928165701	5.823555674	6.001634191	6.116682575	6.015652391	6.203799812	6.105718358	6.276612861	5.697731412	6.02387804	6.266060238	5.548359359	6.234847502	5.719139573	5.591569042	5.760197593	6.187994291	5.7784088	low density lipoprotein receptor-related protein 3	GO:0005575/GO:0005488/GO:0008150/GO:0003674/GO:0005515	ND/IPI	CC/MF/BP	PF00431/PF00057	Lrp3	E9Q711/Q3UEV4/E9Q1T6/Q52KH0		mmu:435965	ko:K20050
ENSMUSG00000001827	0.834605455	1.081385083	0.763152041	1.142160915	0.813935014	0.794027934	0.69364851	0.927992348	0.653248784	0.791107977	0.874123785	1.037208917	0.965481677	1.074090859	0.76604001	0.775455523	0.824259935	0.790625864	0.711022486	0.797683548	folate receptor 1 (adult)	GO:0035239/GO:0070972/GO:0015893/GO:0015849/GO:0045177/GO:0035295/GO:0072341/GO:0071944/GO:0035690/GO:0060090/GO:0045184/GO:0034220/GO:0071231/GO:0031668/GO:0009611/GO:0045047/GO:0035148/GO:0071705/GO:0035050/GO:0032432/GO:0015711/GO:0042221/GO:0015629/GO:0060429/GO:0071407/GO:0008150/GO:0061564/GO:0034641/GO:0035461/GO:0072359/GO:0032501/GO:0033273/GO:0060828/GO:0009887/GO:0009888/GO:0007584/GO:…	IMP/TAS/IEA/ISO/IBA	BP/CC/MF	PF03024	Folr1	P35846	path:mmu01523/path:mmu04144	mmu:14275	ko:K13649	Antifolate resistance - Mus musculus (house mouse)/Endocytosis - Mus musculus (house mouse)
ENSMUSG00000001829	5.960749599	6.334974977	6.068763161	6.312760737	5.985281886	5.683982862	6.038947142	5.984972173	5.826030769	6.000484342	5.910461542	6.064390975	6.069287001	6.231010607	6.339798661	5.832776122	6.190190059	6.135533133	5.91747843	5.923375326	ClpB caseinolytic peptidase B	GO:0033554/GO:0009628/GO:0036094/GO:0016887/GO:0043227/GO:0035639/GO:0009987/GO:0003824/GO:0043229/GO:0016817/GO:0009266/GO:0051716/GO:0008150/GO:0005488/GO:0016462/GO:0005739/GO:0017076/GO:0003674/GO:0097159/GO:0009408/GO:0016818/GO:0032559/GO:0016787/GO:0000166/GO:0043167/GO:0034605/GO:0050896/GO:0043231/GO:0017111/GO:0006950/GO:0030554/GO:0043226/GO:0043168/GO:0005622/GO:0005737/GO:0005524/GO:…	ISO/IEA/HDA	BP/MF/CC	PF12796/PF07724/PF10431	Clpb	Q60649/E9PY58/Q3URM1	path:mmu04213	mmu:20480	ko:K03695	Longevity regulating pathway - multiple species - Mus musculus (house mouse)
ENSMUSG00000001833	6.854798158	6.558935	6.991810607	6.557649834	6.339230239	7.133365062	6.904295406	6.455976179	7.076680885	6.93978665	7.071883549	6.723831699	6.384533648	7.057669048	6.449064401	6.288390567	7.025312388	6.852802269	6.202151235	6.984215633	septin 7	GO:0005856/GO:0048193/GO:0099080/GO:0005737/GO:0098590/GO:0032549/GO:0046907/GO:0140014/GO:0032504/GO:0098793/GO:0098840/GO:0031346/GO:0045930/GO:0048609/GO:0032553/GO:0032561/GO:0006996/GO:0048668/GO:0098687/GO:0005694/GO:0005634/GO:0046983/GO:0031344/GO:0031514/GO:0120036/GO:0006928/GO:1901987/GO:0097060/GO:0032555/GO:0006886/GO:0048666/GO:0005622/GO:0045786/GO:0097650/GO:0032156/GO:0098978/GO:…	IBA/ISO/IMP/IEA/IDA/IPI/HDA	CC/BP/MF	PF00735	7-Sep	E9Q1G8/O55131		mmu:235072	ko:K16944
ENSMUSG00000001844	5.704524092	6.006618432	5.46649492	5.836781325	5.815918958	5.387345769	5.707349228	5.882467367	5.690646137	5.798609587	5.938856931	5.89188688	5.548193295	5.791646494	5.526451422	5.703951636	5.934593608	5.716793553	5.627764616	5.872695882	zinc finger DHHC domain containing 4	GO:0006807/GO:0005622/GO:0009058/GO:1901576/GO:0044237/GO:0018345/GO:0071704/GO:0003824/GO:0006886/GO:0003674/GO:0009059/GO:0110165/GO:0018231/GO:0008104/GO:0016747/GO:1901564/GO:0005783/GO:0018198/GO:0006810/GO:0044267/GO:0018193/GO:0034613/GO:0006497/GO:0140096/GO:0051641/GO:0070727/GO:0008152/GO:0005773/GO:0019706/GO:0019538/GO:0051234/GO:0012505/GO:0071705/GO:0090150/GO:0051179/GO:0044260/GO:…	IBA/ISO/IEA	BP/CC/MF	PF01529	Zdhhc4	Q9D6H5		mmu:72881	ko:K20003
ENSMUSG00000001847	8.626551109	8.869309098	8.92631529	8.88451467	8.440289559	8.778887705	8.812962598	8.60953683	8.844430023	8.768168162	8.943435331	8.845940808	8.683268118	9.013389077	8.832525884	8.555551194	8.998139198	8.994668924	8.384437608	8.904066005	Rac family small GTPase 1	GO:0030286/GO:1902905/GO:0016817/GO:0030334/GO:1903426/GO:0005802/GO:0016787/GO:0043549/GO:0030155/GO:0097159/GO:0021879/GO:0050896/GO:0043652/GO:0000904/GO:0017016/GO:0016818/GO:0030335/GO:0031175/GO:0045666/GO:0005768/GO:0021895/GO:0048870/GO:0051496/GO:0048873/GO:0043412/GO:0050804/GO:1902743/GO:0009987/GO:0048869/GO:0021892/GO:0090304/GO:0021891/GO:0005773/GO:0009628/GO:0006650/GO:1903727/GO:…	IDA/IMP/ISO/IBA/IEA/IGI/TAS/IPI	CC/BP/MF	PF00071	Rac1	P63001/K7Q7T7/Q3TLP8	path:mmu04071/path:mmu05014/path:mmu05417/path:mmu04666/path:mmu05212/path:mmu05210/path:mmu04010/path:mmu05208/path:mmu04613/path:mmu05170/path:mmu04062/path:mmu04151/path:mmu05022/path:mmu04650/path:mmu04664/path:mmu04530/path:mmu04722/path:mmu04380/path:mmu05100/path:mmu05416/path:mmu05415/path:mmu04670/path:mmu04370/path:mmu04310/path:mmu04510/path:mmu04810/path:mmu04024/path:mmu05203/path:mm…	mmu:19353	ko:K04392	Sphingolipid signaling pathway - Mus musculus (house mouse)/Amyotrophic lateral sclerosis - Mus musculus (house mouse)/Lipid and atherosclerosis - Mus musculus (house mouse)/Fc gamma R-mediated phagocytosis - Mus musculus (house mouse)/Pancreatic cancer - Mus musculus (house mouse)/Colorectal cancer - Mus musculus (house mouse)/MAPK signaling pathway - Mus musculus (house mouse)/Chemical carcinog…
ENSMUSG00000001855	5.037708927	5.304914	5.124633875	5.286578319	5.341076853	5.311330819	5.044556515	5.189004911	4.872163283	5.079987923	5.009920203	5.101172405	5.086539913	5.032965529	5.362699515	5.472579134	5.054303826	5.027923537	5.271436019	4.967002662	nucleoporin 214	GO:0008104/GO:0005198/GO:0051641/GO:0051179/GO:0008150/GO:0007049/GO:0140142/GO:0031503/GO:0031967/GO:0051236/GO:0000280/GO:1990876/GO:0030055/GO:0110165/GO:0050794/GO:0008139/GO:0003674/GO:0005048/GO:0015833/GO:0005215/GO:0000278/GO:0051170/GO:0051234/GO:0071702/GO:0005488/GO:0016020/GO:0065007/GO:0051028/GO:0050658/GO:0005634/GO:0051649/GO:0043226/GO:0071704/GO:0034613/GO:0016043/GO:0012505/GO:…	IBA/IMP/ISO/IEA	BP/MF/CC	PF18617	Nup214	Q80U93	path:mmu03013/path:mmu05014	mmu:227720	ko:K14317	Nucleocytoplasmic transport - Mus musculus (house mouse)/Amyotrophic lateral sclerosis - Mus musculus (house mouse)
ENSMUSG00000001864	3.054516657	3.062116805	2.602983971	2.81220202	2.774318909	3.416685866	2.943025061	2.974892031	3.388563151	2.895745504	3.052776879	3.064565503	2.784751886	3.140282465	3.104997385	3.157129359	3.584006966	2.941535912	2.678271703	2.712272331	allograft inflammatory factor 1-like	GO:0043229/GO:0003779/GO:0044085/GO:0005925/GO:0043228/GO:0030030/GO:0099080/GO:0005737/GO:0005575/GO:0009987/GO:0015629/GO:0007015/GO:0120025/GO:0043232/GO:0099081/GO:0098590/GO:0005515/GO:0110165/GO:0005509/GO:0003674/GO:0043169/GO:0008092/GO:0030055/GO:0097435/GO:0051015/GO:0016043/GO:0022607/GO:0007010/GO:0043226/GO:0016020/GO:0120036/GO:0005622/GO:0044877/GO:0046872/GO:0061572/GO:0032991/GO:…	IEA/ISO/IBA	CC/MF/BP		Aif1l	Q9EQX4		mmu:108897	ko:K18617
ENSMUSG00000001870	2.615799687	2.983461104	2.853480305	2.744156808	2.621244999	2.752862343	2.441358305	2.759558619	2.98813278	2.468272715	2.821683223	2.847398719	2.480156509	2.930924419	2.627651416	3.120394375	2.836121205	2.399906586	2.582704678	2.913694709	latent transforming growth factor beta binding protein 1	GO:0009893/GO:0003674/GO:0051716/GO:1901388/GO:0035581/GO:0035583/GO:0005201/GO:0009891/GO:0005198/GO:0005576/GO:1903844/GO:0035904/GO:1900116/GO:1903845/GO:0071363/GO:0036477/GO:0010648/GO:0033036/GO:0051179/GO:0010712/GO:0009889/GO:0060840/GO:0032967/GO:0009719/GO:1900115/GO:0032991/GO:0120025/GO:0010033/GO:0009966/GO:0071310/GO:0003231/GO:0071495/GO:0005575/GO:0038045/GO:0051235/GO:0010646/GO:…	ISO/RCA/TAS/IEA/IDA/IMP/HDA/IBA	BP/MF/CC	PF12662/PF07645/PF00683	Ltbp1	Q8CG19	path:mmu04350	mmu:268977	ko:K19559	TGF-beta signaling pathway - Mus musculus (house mouse)
ENSMUSG00000001891	5.837269582	6.021886297	5.825833765	5.402305514	5.561621392	5.867412836	6.037787058	5.53718891	6.037324097	5.594386456	5.874317082	5.813801034	5.974324432	6.172241543	6.51391218	6.153195801	5.876685264	5.864553847	5.391677991	5.904542247	UDP-glucose pyrophosphorylase 2	GO:0032553/GO:0006091/GO:0044238/GO:0046483/GO:0044281/GO:0019103/GO:1901360/GO:0016772/GO:1901135/GO:0034641/GO:1901265/GO:0006793/GO:0046872/GO:0003824/GO:0006725/GO:0043167/GO:0044042/GO:0016779/GO:0044264/GO:0006796/GO:0016740/GO:0032557/GO:0044237/GO:0003674/GO:0042802/GO:0003983/GO:0006011/GO:0005488/GO:0036094/GO:1901363/GO:0044262/GO:0055086/GO:0000166/GO:0006139/GO:0043169/GO:0043170/GO:…	ISO/IBA/IEA	MF/BP/CC	PF01704	Ugp2	Q3U548/Q91ZJ5	path:mmu01250/path:mmu00040/path:mmu01100/path:mmu00520/path:mmu01240/path:mmu00500/path:mmu00052	mmu:216558	ko:K00963	Biosynthesis of nucleotide sugars - Mus musculus (house mouse)/Pentose and glucuronate interconversions - Mus musculus (house mouse)/Metabolic pathways - Mus musculus (house mouse)/Amino sugar and nucleotide sugar metabolism - Mus musculus (house mouse)/Biosynthesis of cofactors - Mus musculus (house mouse)/Starch and sucrose metabolism - Mus musculus (house mouse)/Galactose metabolism - Mus musc…
ENSMUSG00000001909	6.175503675	6.370461512	6.124767539	6.111662446	6.238369893	5.95959507	6.431918891	6.256810774	6.163297984	6.088325697	5.72964838	6.024438218	5.988885402	6.168914536	6.266838893	6.499603049	6.117796936	6.27839771	6.549850696	6.323496786	tRNA methyltransferase 1	GO:0034641/GO:0034470/GO:0044238/GO:0006399/GO:0043412/GO:0032259/GO:0006139/GO:0044237/GO:0008175/GO:0003824/GO:0003674/GO:0043414/GO:0043231/GO:0016741/GO:0030488/GO:0008757/GO:0008033/GO:0043170/GO:0071704/GO:0090304/GO:0003723/GO:0008150/GO:0046872/GO:0005488/GO:0043227/GO:0043229/GO:0110165/GO:0034660/GO:0006396/GO:0003676/GO:0000049/GO:0046483/GO:0005634/GO:0043167/GO:0043226/GO:0001510/GO:…	IBA/IEA/ISO	BP/MF/CC	PF00642/PF02005	Trmt1	E9PWD4/Q3TX08/A0A0R4IZW7		mmu:212528	ko:K00555
ENSMUSG00000001910	7.300779098	7.477037789	7.422566509	7.585045925	7.289200279	7.320706827	7.377038357	7.299837844	7.242691342	7.510624251	7.456521045	7.468843422	7.371507893	7.137055246	7.418028579	7.493353479	7.394445119	7.192011689	7.764992071	7.3150991	nucleus accumbens associated 1 BEN and BTB (POZ) domain containing	GO:0005622/GO:0044260/GO:0065007/GO:0005575/GO:0070013/GO:0045892/GO:0009890/GO:0009059/GO:0044271/GO:0065003/GO:0003674/GO:0051253/GO:0008284/GO:1903507/GO:0005515/GO:0042127/GO:0051259/GO:2001141/GO:0034654/GO:0009058/GO:0009889/GO:0051260/GO:0060255/GO:2000112/GO:0034645/GO:2000113/GO:0009892/GO:0018130/GO:0008150/GO:0022607/GO:0044238/GO:0051171/GO:0006725/GO:0008152/GO:0031323/GO:0030054/GO:…	IEA/ISO/IPI	CC/BP/MF	PF00651/PF10523	Nacc1	Q7TSZ8		mmu:66830	ko:K10486
ENSMUSG00000001911	9.015567459	9.132238576	9.07494204	8.945166491	9.189542067	8.986190851	9.109752822	8.997767796	9.004153098	8.931718901	9.094342088	9.146647987	8.98318875	9.136625636	8.95475498	9.164780197	8.882180859	8.903923971	9.249405876	9.10747613	nuclear factor I/X	GO:1901362/GO:0001012/GO:0044237/GO:0034645/GO:0010557/GO:1901363/GO:1902679/GO:0010556/GO:1902680/GO:0000981/GO:0009058/GO:1901360/GO:0021680/GO:0032501/GO:0044238/GO:0009889/GO:0021695/GO:0009890/GO:0003676/GO:0021681/GO:0044271/GO:0031981/GO:0048708/GO:0034654/GO:0044260/GO:0022037/GO:0001067/GO:0051254/GO:0005654/GO:0010605/GO:0031328/GO:1901576/GO:0031974/GO:0003674/GO:0006357/GO:0048513/GO:…	ISO/IBA/IEA/IDA/IMP/IPI	BP/MF/CC	PF00859/PF03165/PF10524	Nfix	Q5CZY4/Q3TYK3/E9PUH7/P70257		mmu:18032	ko:K09171
ENSMUSG00000001918	1.300673686	1.803405138	1.68194081	1.698676605	1.435711125	1.411188041	1.432593351	1.618333506	1.414219769	1.383614101	1.999151874	1.717152338	1.389657895	2.217212009	1.39704798	1.410901649	2.047483213	1.419763821	1.315882952	1.790461649	solute carrier family 1 (neutral amino acid transporter) member 5	GO:0003333/GO:0046942/GO:0006855/GO:0051234/GO:0034220/GO:0051259/GO:0016043/GO:0003674/GO:0005488/GO:0046903/GO:0016021/GO:0005342/GO:0043090/GO:0006865/GO:0016020/GO:0051179/GO:0005575/GO:0008514/GO:0005215/GO:0046943/GO:0015075/GO:0022889/GO:0006810/GO:0050896/GO:0022607/GO:0008509/GO:0008324/GO:1902475/GO:0006820/GO:0006868/GO:0015318/GO:0009987/GO:0005886/GO:0043933/GO:0140352/GO:0015711/GO:…	ISO/IEA/IDA	BP/MF/CC	PF00375	Slc1a5	Q3UFR4/Q9ESU7	path:mmu05230/path:mmu04974	mmu:20514	ko:K05616	Central carbon metabolism in cancer - Mus musculus (house mouse)/Protein digestion and absorption - Mus musculus (house mouse)
ENSMUSG00000001924	8.865515387	9.056504617	8.62892082	8.889998255	9.182999312	8.8756927	8.98674955	8.8811478	8.654313292	8.963327965	8.543236937	8.962389277	8.99824182	8.755134656	9.122392186	8.995883438	8.805463426	8.962512423	9.138817498	9.055629765	ubiquitin-like modifier activating enzyme 1	GO:0033554/GO:1901564/GO:0005911/GO:0051716/GO:0044237/GO:0005737/GO:0019538/GO:0006464/GO:0016874/GO:0005575/GO:0003674/GO:0044238/GO:0043170/GO:0016567/GO:0043168/GO:0005694/GO:0005524/GO:0000792/GO:0008150/GO:0050896/GO:0036211/GO:0043167/GO:0016877/GO:0005886/GO:0006807/GO:0043412/GO:0000785/GO:0042175/GO:0110165/GO:0044267/GO:0005654/GO:0005622/GO:0071704/GO:0003824/GO:0004839/GO:0031981/GO:…	ISO/IBA/IEA/IDA/IPI	BP/CC/MF	PF10585/PF09358/PF00899/PF16191/PF16190	Uba1	A0A1S6GWH5/B9EHN0/Q02053	path:mmu04120/path:mmu05012/path:mmu05022	mmu:22201	ko:K03178	Ubiquitin mediated proteolysis - Mus musculus (house mouse)/Parkinson disease - Mus musculus (house mouse)/Pathways of neurodegeneration - multiple diseases - Mus musculus (house mouse)
ENSMUSG00000001930	4.228409895	5.079554053	4.585167544	4.676378037	4.763871391	4.377607558	4.677832015	5.205983395	4.292787219	4.498863179	4.782546957	4.670443976	5.148108299	4.39679619	4.468704639	4.24680233	4.733474166	4.710131581	4.744611361	4.663446284	Von Willebrand factor	GO:0005198/GO:0005102/GO:0050817/GO:0050896/GO:0006950/GO:0016020/GO:0032502/GO:0007599/GO:0032501/GO:0050839/GO:0005178/GO:0005518/GO:0071944/GO:0043226/GO:0022610/GO:0097478/GO:0065008/GO:0003674/GO:0042803/GO:0031982/GO:0097708/GO:0022607/GO:0007596/GO:0065007/GO:0042802/GO:0019865/GO:0048732/GO:0007155/GO:0050878/GO:0005201/GO:0061458/GO:0062023/GO:0005886/GO:0071840/GO:0005615/GO:0019899/GO:…	RCA/ISO/IMP/TAS/IDA/HDA/IPI	MF/BP/CC	PF00094/PF01826/PF16164/PF00093/PF08742/PF00092	Vwf	Q8CIZ8/E9QPU1	path:mmu04611/path:mmu05171/path:mmu04613/path:mmu04512/path:mmu04151/path:mmu05165/path:mmu04510/path:mmu04610	mmu:22371	ko:K03900	Platelet activation - Mus musculus (house mouse)/Coronavirus disease - COVID-19 - Mus musculus (house mouse)/Neutrophil extracellular trap formation - Mus musculus (house mouse)/ECM-receptor interaction - Mus musculus (house mouse)/PI3K-Akt signaling pathway - Mus musculus (house mouse)/Human papillomavirus infection - Mus musculus (house mouse)/Focal adhesion - Mus musculus (house mouse)/Complem…
ENSMUSG00000001942	4.789283559	4.509561056	4.885600411	5.065322281	4.4860537	5.201730807	4.585585772	4.769877677	4.905237248	4.660505963	5.100918797	4.987511277	4.658901618	4.911033784	4.768631951	4.438929942	4.716132707	4.878749632	4.59052525	5.070343617	sialic acid acetylesterase	GO:0005764/GO:0043227/GO:0005575/GO:0050789/GO:0052689/GO:0043226/GO:0003824/GO:0005975/GO:0003674/GO:0005737/GO:0002682/GO:0000323/GO:0110165/GO:0034338/GO:0043229/GO:0071704/GO:0044238/GO:0016788/GO:0008126/GO:0016787/GO:0002376/GO:0065007/GO:0008152/GO:0001681/GO:0043231/GO:0008150/GO:0005773/GO:0005622	IEA/ISO	CC/BP/MF	PF03629	Siae	P70665		mmu:22619	ko:K05970
ENSMUSG00000001946	4.574412314	4.002032056	4.378078362	4.337243098	4.908754149	4.814247595	4.741322045	4.786857654	4.387513603	4.476349285	4.249911226	4.643383152	4.506553896	4.72865469	4.323989622	4.248532293	4.286260076	4.621614671	4.848682688	4.699955497	endothelial cell-specific adhesion molecule	GO:0110165/GO:0009987/GO:0098609/GO:0070161/GO:0008150/GO:0120193/GO:0098742/GO:0007155/GO:0022610/GO:0005575/GO:0016338/GO:0030054/GO:0045216/GO:0044085/GO:0120192/GO:0007156/GO:0016043/GO:0005911/GO:0016020/GO:0071840/GO:0031224/GO:0007043/GO:0070830/GO:0005912/GO:0043296/GO:0005923/GO:0005886/GO:0070160/GO:0034330/GO:0043297/GO:0022607/GO:0034329/GO:0071944/GO:0032991/GO:0016021	IEA/ISO/IDA/TAS	CC/BP	PF07686	Esam	Q925F2/Q3U102	path:mmu04670/path:mmu04514	mmu:69524	ko:K06787	Leukocyte transendothelial migration - Mus musculus (house mouse)/Cell adhesion molecules - Mus musculus (house mouse)
ENSMUSG00000001948	1.284430503	1.407843323	1.225400915	1.29415475	1.540233742	1.198821367	1.410737964	1.465067157	1.410426527	1.439579727	1.540941936	1.286574561	1.213834327	1.262412285	1.542240612	1.217417768	1.144075679	1.115721413	1.227648028	1.121691006	sperm autoantigenic protein 17	GO:0036157/GO:0036156/GO:0032991/GO:0097729/GO:0042995/GO:0030990/GO:0005874/GO:0035036/GO:0005886/GO:0035686/GO:0097545/GO:0099080/GO:0005856/GO:0099568/GO:0031514/GO:0097650/GO:0005575/GO:0097649/GO:0098552/GO:0005858/GO:0098590/GO:0032838/GO:0005622/GO:0097540/GO:0005881/GO:0110165/GO:0007339/GO:0005737/GO:0097228/GO:1990719/GO:0099513/GO:0005879/GO:0008037/GO:0005875/GO:0005930/GO:0043232/GO:…	IBA/ISO/IDA/TAS/IEA	CC/BP/MF	PF02197/PF00612	Spa17	Q62252/Q545M2		mmu:20686	ko:K25633
ENSMUSG00000001962	5.490116509	6.01368003	5.468894083	5.693846795	5.656055293	5.613237532	5.81372967	5.848025474	5.82306592	5.145794594	5.611135083	5.587397313	5.556630025	5.716535757	5.795265135	5.769518566	5.934426782	5.89832885	5.605141757	5.893602984	family with sequence similarity 50 member A	GO:0043227/GO:0005575/GO:0005634/GO:0043226/GO:0031974/GO:0043233/GO:0043229/GO:0005622/GO:0005654/GO:0070013/GO:0110165/GO:0043231/GO:0031981	ISO	CC	PF04921	Fam50a	A0A158SIT3/Q9WV03		mmu:108160	ko:K13119
ENSMUSG00000001964	5.729768432	6.071617006	5.827842122	6.101130441	6.056354361	5.83268204	5.966124198	6.297333087	5.858778711	6.085474922	5.763675264	6.144274597	6.020491409	6.167511612	5.686126875	5.925703297	6.220579646	5.958255543	5.878737195	6.105810803	emerin	GO:1905114/GO:0043226/GO:0007517/GO:0005515/GO:0043228/GO:0042175/GO:0032502/GO:0110165/GO:0032879/GO:1903827/GO:0007519/GO:0006611/GO:0006886/GO:0005575/GO:0005886/GO:0033157/GO:0031967/GO:0003674/GO:0033036/GO:0005622/GO:0007275/GO:0006913/GO:0005634/GO:0031965/GO:0005635/GO:0007165/GO:0198738/GO:0032880/GO:0031974/GO:0099512/GO:0043227/GO:0060538/GO:0032541/GO:0099513/GO:0008092/GO:0009987/GO:…	ISO/IGI/IPI/IBA/IEA/IMP/TAS/IDA	BP/CC/MF	PF03020	Emd	A2AM95/O08579/Q3THM8	path:mmu05414/path:mmu05412/path:mmu05410	mmu:13726	ko:K12569	Dilated cardiomyopathy - Mus musculus (house mouse)/Arrhythmogenic right ventricular cardiomyopathy - Mus musculus (house mouse)/Hypertrophic cardiomyopathy - Mus musculus (house mouse)
ENSMUSG00000001983	1.988121441	2.252607665	1.792745628	1.771440015	2.260288969	2.078078427	2.315920742	2.068399183	1.917342132	1.870337396	2.12533209	2.372275698	1.96458854	2.19151682	1.954308928	1.847480194	2.021962926	2.022981031	1.903975223	2.040945869	translational activator of mitochondrially encoded cytochrome c oxidase I	GO:0032268/GO:0005739/GO:0043227/GO:1901566/GO:1901576/GO:2000112/GO:0034645/GO:0110165/GO:1901564/GO:0043229/GO:0031326/GO:0006412/GO:0019538/GO:0019222/GO:0043226/GO:0005575/GO:0005622/GO:0006807/GO:0034641/GO:0010468/GO:0006417/GO:0006518/GO:0043043/GO:0005737/GO:0034248/GO:0008150/GO:0005634/GO:0050789/GO:0010467/GO:0031323/GO:0009889/GO:0003674/GO:0043170/GO:0006414/GO:0010608/GO:0044271/GO:…	IEA/IBA/ISO/HDA/ND	BP/CC/MF	PF01709	Taco1	Q8K0Z7		mmu:70207	ko:K18189
ENSMUSG00000001985	4.173604814	4.060277518	4.297849145	3.739851323	3.946032077	3.851834318	4.076035325	4.198026286	4.18379661	3.99321138	4.076673983	4.074027485	3.837118915	3.527130252	4.012928488	4.236228169	4.114903474	3.842694687	3.995083398	3.87936251	glutamate receptor ionotropic kainate 3	GO:0050896/GO:0007165/GO:0005575/GO:0016597/GO:0022836/GO:0005515/GO:0031226/GO:0045211/GO:0005488/GO:0015075/GO:0036094/GO:0045202/GO:0031406/GO:0004888/GO:0015267/GO:0007154/GO:0098916/GO:0046873/GO:0050804/GO:0004970/GO:0098793/GO:0098590/GO:0015077/GO:0003674/GO:0004930/GO:0048519/GO:0022803/GO:0035249/GO:0022835/GO:0031224/GO:0005272/GO:0032991/GO:0099094/GO:0022824/GO:0050805/GO:0005886/GO:…	ISO/IBA/IDA/IPI/IMP/IEA	BP/CC/MF	PF10613/PF00060/PF01094	Grik3	B1AS29	path:mmu04080/path:mmu04724	mmu:14807	ko:K05203	Neuroactive ligand-receptor interaction - Mus musculus (house mouse)/Glutamatergic synapse - Mus musculus (house mouse)
ENSMUSG00000001986	4.120792148	3.292424734	4.268154154	3.467020898	3.930435664	4.382864245	3.931357216	3.61099574	4.500523517	4.103376015	3.875134667	3.902411718	3.736239169	3.360283297	4.384170606	4.063164028	3.702627279	3.968711359	4.082384931	3.391645308	glutamate receptor ionotropic AMPA3 (alpha 3)	GO:0043197/GO:0022857/GO:0015075/GO:0003674/GO:0022890/GO:0043195/GO:0031406/GO:0009987/GO:0010324/GO:0005488/GO:0097060/GO:0022834/GO:0005886/GO:0032279/GO:0098797/GO:0015318/GO:0099699/GO:0098796/GO:0014069/GO:0005575/GO:0110165/GO:0098590/GO:0044306/GO:0043177/GO:0008328/GO:0005887/GO:0044297/GO:0034703/GO:1902495/GO:0044237/GO:0099634/GO:0043170/GO:0043235/GO:0032991/GO:0043168/GO:0099146/GO:…	ISO/IDA/IBA/IMP/IPI/IEA	CC/MF/BP	PF00060/PF01094/PF10613	Gria3	Q0VGS8/B0QZW1/Q3UY17/Q9Z2W9	path:mmu05033/path:mmu05016/path:mmu04080/path:mmu05022/path:mmu05017/path:mmu04024/path:mmu04724/path:mmu04723/path:mmu05202/path:mmu04713/path:mmu04730/path:mmu05031/path:mmu04728	mmu:53623	ko:K05199	Nicotine addiction - Mus musculus (house mouse)/Huntington disease - Mus musculus (house mouse)/Neuroactive ligand-receptor interaction - Mus musculus (house mouse)/Pathways of neurodegeneration - multiple diseases - Mus musculus (house mouse)/Spinocerebellar ataxia - Mus musculus (house mouse)/cAMP signaling pathway - Mus musculus (house mouse)/Glutamatergic synapse - Mus musculus (house mouse)/…
ENSMUSG00000001988	3.228839768	3.526025824	3.36381101	3.382274725	4.038471197	3.329945879	3.079716797	3.495635653	3.292389291	3.414022444	3.201860456	3.46663991	4.032045306	3.229776107	3.446657384	3.507686843	3.095873814	3.594574051	3.875951031	3.48509518	neuronal PAS domain protein 1	GO:0009889/GO:0051254/GO:1902680/GO:0031325/GO:1901576/GO:1901363/GO:0044238/GO:1903506/GO:0044249/GO:0051253/GO:0006139/GO:0031324/GO:1902679/GO:0051252/GO:0034641/GO:0006725/GO:0080090/GO:0001012/GO:0031326/GO:0045944/GO:0046483/GO:0071704/GO:0001964/GO:0001067/GO:0010556/GO:0010468/GO:0043229/GO:2001141/GO:0000977/GO:0006351/GO:0003700/GO:0003677/GO:0031323/GO:0019438/GO:0000981/GO:0060746/GO:…	IEA/IBA/IDA/IGI/IPI	BP/MF/CC	PF00010/PF08447/PF00989	Npas1	A2RSH6/P97459		mmu:18142	ko:K09098
ENSMUSG00000001995	5.956014797	6.278093473	6.056698058	6.257445492	6.51084317	6.237454407	6.21451126	6.223997963	6.082882426	6.148790053	6.136175945	6.134583575	6.113890306	6.427113403	6.304809532	6.093802791	6.08927156	5.853255139	6.11772442	6.291666093	signal-induced proliferation-associated 1 like 2	GO:0023051/GO:0030234/GO:0017111/GO:0035556/GO:0008047/GO:0023052/GO:0098772/GO:0048583/GO:0007264/GO:0030695/GO:1902531/GO:0008150/GO:0007154/GO:0007165/GO:0065007/GO:0050789/GO:0009966/GO:0051056/GO:0050794/GO:0060589/GO:0016462/GO:0016818/GO:0050896/GO:0016817/GO:0051716/GO:0003924/GO:0003824/GO:0010646/GO:0003674/GO:0005575/GO:0005096/GO:0016787/GO:0009987	IEA/ND	BP/MF/CC	PF11881/PF02145/PF00595	Sipa1l2	Q80TE4	path:mmu04015	mmu:244668	ko:K17702	Rap1 signaling pathway - Mus musculus (house mouse)
ENSMUSG00000001998	1.520521622	1.597191606	1.561269534	1.377308561	1.603502071	1.573882338	1.423081908	1.581414568	1.652681757	1.36728944	1.299847577	1.52216752	1.45406048	1.421651346	1.490256381	1.508237657	1.799622476	1.442028812	1.551703768	1.528856767	adaptor-related protein complex AP-4 epsilon 1	GO:0043227/GO:0005488/GO:0051179/GO:0008150/GO:0043226/GO:0051234/GO:0048475/GO:0006886/GO:0046907/GO:0051641/GO:0009987/GO:0005622/GO:0003674/GO:0098796/GO:0042886/GO:0005575/GO:0045184/GO:0071705/GO:0034613/GO:0008104/GO:0005802/GO:0033036/GO:0012505/GO:0051649/GO:0005515/GO:0110165/GO:0031984/GO:0043231/GO:0005886/GO:0005794/GO:0006810/GO:0098791/GO:0043229/GO:0032991/GO:0005773/GO:0071944/GO:…	IEA/IPI/TAS/ISO	CC/MF/BP	PF14807/PF01602	Ap4e1	Q80V94	path:mmu04142	mmu:108011	ko:K12400	Lysosome - Mus musculus (house mouse)
ENSMUSG00000001999	6.129583469	6.318510091	5.924816324	5.98820338	6.297993702	6.14893493	6.129960204	6.180342534	5.980650436	6.321364898	6.098642135	6.105731467	6.203051561	6.075309472	6.128802702	6.060317622	6.078107144	6.318126908	6.121686885	5.964491723	biliverdin reductase A	GO:0016491/GO:0051187/GO:0003824/GO:1901361/GO:1901564/GO:0071704/GO:0008152/GO:1901363/GO:0044270/GO:0044237/GO:0051186/GO:0055114/GO:0009056/GO:0003674/GO:0008270/GO:0110165/GO:0042167/GO:0097159/GO:0043169/GO:0044248/GO:0005622/GO:0006725/GO:0042168/GO:0005829/GO:0042440/GO:0006807/GO:0046483/GO:0006778/GO:1901565/GO:0009987/GO:1901265/GO:1901360/GO:0043167/GO:0046149/GO:0046872/GO:0033015/GO:…	IEA/ISO/IDA/IBA	MF/BP/CC	PF01408/PF09166	Blvra	Q9CY64	path:mmu01100/path:mmu00860	mmu:109778	ko:K00214	Metabolic pathways - Mus musculus (house mouse)/Porphyrin metabolism - Mus musculus (house mouse)
ENSMUSG00000002006	6.106408376	6.193764914	6.118509493	5.717210864	6.390546048	6.10774497	6.536029379	6.127964638	6.050648935	6.238494669	6.077381852	5.88362463	6.487307547	5.601634763	5.987319771	6.080012288	5.937151035	5.857260367	6.393236366	6.032158544	PDZ domain containing 4	GO:0044237/GO:0043412/GO:0005622/GO:0044267/GO:0044238/GO:0140096/GO:0044260/GO:1901564/GO:0061630/GO:0003674/GO:0008150/GO:0036211/GO:0070647/GO:0032446/GO:0110165/GO:0006464/GO:0043170/GO:0061659/GO:0019787/GO:0006807/GO:0071704/GO:0019538/GO:0005737/GO:0003824/GO:0005575/GO:0009987/GO:0016567/GO:0004842/GO:0016740/GO:0008152	IBA/IEA	BP/CC/MF	PF00595	Pdzd4	Q9QY39/A2AFG3		mmu:245469	ko:K24056
ENSMUSG00000002007	0.363364597	0.154994458	0.344701601	0.290732174	0.140618686	0.17255392	0.112903155	0.256753122	0.40094368	0.126937485	0.175542429	0.12869089	0.129161483	0.431871727	0.410448431	0.426222908	0.142900133	0.590904444	0.134793065	0.130483073	serine/arginine-rich protein specific kinase 3	GO:0044238/GO:0030554/GO:0019219/GO:0006397/GO:0044260/GO:0060255/GO:0061061/GO:0004674/GO:0005622/GO:0019222/GO:0051171/GO:0022613/GO:0004672/GO:0031323/GO:0044237/GO:0051252/GO:0032501/GO:0019538/GO:0006807/GO:0003674/GO:0051716/GO:0032559/GO:0005575/GO:0016773/GO:0016740/GO:0060538/GO:0006725/GO:0000398/GO:0003824/GO:0050794/GO:0005488/GO:0022618/GO:0005737/GO:0022607/GO:0023052/GO:0005524/GO:…	IBA/IEA/IDA/IMP	BP/MF/CC	PF00069	Srpk3	Q9Z0G2/Q0VAW8		mmu:56504	ko:K08832
ENSMUSG00000002010	7.594026293	7.751917872	7.419176504	7.812397456	7.733946575	7.572028377	7.936397809	7.584338003	7.574274237	7.686478457	7.495887594	7.590722843	7.611445455	7.587533575	7.862448542	7.516402754	7.825727175	7.708272883	7.847553709	7.368412004	isocitrate dehydrogenase 3 (NAD+) gamma	GO:0043231/GO:0032559/GO:0032553/GO:0006099/GO:0005575/GO:0005488/GO:0036094/GO:0031981/GO:0004448/GO:0005622/GO:0043227/GO:0045333/GO:0043229/GO:0035639/GO:0006082/GO:0032555/GO:0017076/GO:0043232/GO:0045926/GO:0040008/GO:0015980/GO:0043226/GO:0016491/GO:0006102/GO:0031974/GO:0043167/GO:0040007/GO:0043233/GO:0003824/GO:0016616/GO:0009060/GO:1901265/GO:0008144/GO:0003674/GO:0005524/GO:0019752/GO:…	HDA/IEA/ISO/IBA	CC/MF/BP	PF00180	Idh3g	P70404/Q3TGZ3	path:mmu01100/path:mmu01230/path:mmu01210/path:mmu00020/path:mmu01200	mmu:15929	ko:K00030	Metabolic pathways - Mus musculus (house mouse)/Biosynthesis of amino acids - Mus musculus (house mouse)/2-Oxocarboxylic acid metabolism - Mus musculus (house mouse)/Citrate cycle (TCA cycle) - Mus musculus (house mouse)/Carbon metabolism - Mus musculus (house mouse)
ENSMUSG00000002012	6.846689107	6.958516033	6.474475729	6.237202826	7.045437804	6.601620507	6.913240058	6.727896306	6.465898836	6.775523762	6.208823168	6.161761925	7.357806799	6.319939035	7.111178258	6.963565076	6.417683437	6.307889834	7.170025699	6.545083383	pregnancy upregulated non-ubiquitously expressed CaM kinase	GO:0097367/GO:0097159/GO:0043229/GO:0140096/GO:0036094/GO:0016773/GO:0110165/GO:1901265/GO:0035639/GO:0005516/GO:0043227/GO:0043226/GO:0005488/GO:0016772/GO:0044237/GO:0043167/GO:0005634/GO:1901363/GO:0003674/GO:0016740/GO:0004683/GO:0005575/GO:0005515/GO:0004672/GO:0005524/GO:0005622/GO:0004674/GO:0009987/GO:0043231/GO:0016301/GO:0043168/GO:0030554/GO:0003824/GO:0017076/GO:0032559/GO:0032555/GO:…	IEA/IBA/ISO	MF/CC/BP	PF00069	Pnck	Q9QYK9/Q3UYI0/Q3TYC1		mmu:93843	ko:K08795
ENSMUSG00000002014	6.995882518	7.29731364	7.049689642	7.582505011	7.216058407	7.008588933	7.272852045	7.078236119	6.791143211	6.777467758	7.317947116	7.347286151	6.973517175	7.570256232	7.378381961	7.071670137	7.629639941	7.538042681	6.916288033	7.382286072	signal sequence receptor delta	GO:0005783/GO:0071944/GO:0031224/GO:0005886/GO:0043231/GO:0005773/GO:0031090/GO:0098588/GO:0005737/GO:0016020/GO:0005791/GO:0043229/GO:0043227/GO:0012505/GO:0032991/GO:0003674/GO:0110165/GO:0005575/GO:0098796/GO:0043226/GO:0005622/GO:0005789/GO:0005784/GO:0030867/GO:0071256/GO:0008150/GO:0016021/GO:0042175	IEA/ISO/ND	CC/MF/BP	PF05404	Ssr4	Q3TVJ8/Q9D8L3/Q62186	path:mmu04141	mmu:20832	ko:K04571	Protein processing in endoplasmic reticulum - Mus musculus (house mouse)
ENSMUSG00000002015	6.209751633	6.379916946	6.640513223	6.605831764	5.855105297	6.326646731	6.441366201	5.926824599	6.419140141	6.623066671	6.676986665	6.464412847	6.322677385	6.248660503	6.627901541	6.066838628	6.478283166	6.413158036	6.147849208	5.938661572	B cell receptor associated protein 31	GO:0070972/GO:0098588/GO:0050790/GO:0043232/GO:0050789/GO:0051480/GO:0071705/GO:0048584/GO:0043280/GO:0043231/GO:0005773/GO:0023051/GO:0031323/GO:0043170/GO:0030162/GO:0005737/GO:0051247/GO:0090087/GO:0071702/GO:0023052/GO:0030433/GO:0048609/GO:0070973/GO:0098771/GO:0043161/GO:0030163/GO:0051560/GO:0042886/GO:0098791/GO:0080135/GO:0050801/GO:0031226/GO:0005515/GO:0005488/GO:0002376/GO:0071944/GO:…	IGI/IDA/ISO/IBA/IEA/IEP/IPI/IMP	BP/CC/MF	PF05529/PF18035	Bcap31	Q61335	path:mmu05165/path:mmu04141	mmu:27061	ko:K14009	Human papillomavirus infection - Mus musculus (house mouse)/Protein processing in endoplasmic reticulum - Mus musculus (house mouse)
ENSMUSG00000002017	4.85361537	4.574064641	4.369236143	4.443301552	4.518920231	4.653398387	4.665704547	4.386736678	4.860214136	4.634192697	4.456298433	4.290808628	4.602995743	4.630562981	4.704146263	4.553810652	4.545007854	4.691559528	4.470562925	4.620928084	family with sequence similarity 98 member A	GO:0005515/GO:0022607/GO:0008150/GO:0009987/GO:0048518/GO:0048522/GO:0120035/GO:0019222/GO:0019538/GO:0008213/GO:0005575/GO:0006479/GO:0044237/GO:0120034/GO:0043170/GO:0006807/GO:0120036/GO:0030031/GO:1900027/GO:0010628/GO:0031346/GO:0036211/GO:0043412/GO:0044267/GO:0010468/GO:0050794/GO:0032991/GO:0051128/GO:0006464/GO:0120032/GO:0016740/GO:0030030/GO:0031344/GO:0003674/GO:0008283/GO:0010604/GO:…	IPI/IMP/ISO/IBA	MF/BP/CC	PF10239	Fam98a	Q3TJZ6		mmu:72722
ENSMUSG00000002028	5.270975709	4.762148648	5.185575585	4.730685819	4.610934313	5.27243447	5.097162684	5.152943257	5.225056283	5.176409281	5.073988607	4.994649371	4.959507277	4.599150709	4.715529328	4.601109582	4.257052992	4.397285464	5.383378193	4.592355387	lysine (K)-specific methyltransferase 2A	GO:0001067/GO:0001894/GO:0002376/GO:0002520/GO:0003002/GO:0003008/GO:0003674/GO:0003676/GO:0003677/GO:0003682/GO:0003824/GO:0005488/GO:0005515/GO:0005575/GO:0006139/GO:0006259/GO:0006304/GO:0006306/GO:0006325/GO:0006725/GO:0006807/GO:0006810/GO:0006996/GO:0007154/GO:0031328/GO:0032259/GO:0032268/GO:0032270/GO:0008152/GO:0008168/GO:0008170/GO:0008276/GO:0008306/GO:0008542/GO:0009058/GO:0009059/GO:…	ISO/IGI/IMP/IBA/IDA/IEA/IPI	MF/BP/CC		Kmt2a
ENSMUSG00000002031	6.094359134	6.36803635	5.807244257	5.807178519	6.135071311	6.11071839	6.122926327	6.246107562	6.067978638	6.141091066	5.970866601	5.858372964	6.208251482	5.790256825	5.988271448	5.681360695	5.952229121	6.295475986	6.176948528	6.022587168	intraflagellar transport 46	GO:0016020/GO:0006928/GO:0048193/GO:0015833/GO:0046907/GO:0045184/GO:0030705/GO:0048199/GO:0015630/GO:0000226/GO:0030030/GO:0015031/GO:0030990/GO:0001539/GO:0030031/GO:0071702/GO:0006903/GO:0007017/GO:0005575/GO:0001578/GO:0042073/GO:0070925/GO:0050896/GO:0070727/GO:0065007/GO:0010970/GO:0043229/GO:0003341/GO:0006886/GO:0006810/GO:0043232/GO:0048870/GO:0043228/GO:0007018/GO:0009987/GO:0005488/GO:…	IBA/ISO/IMP/IDA/IC/IPI/IEA	CC/BP/MF	PF12317	Ift46	Q9DB07		mmu:76568	ko:K19682
ENSMUSG00000002032	5.020959487	4.808830356	4.755573133	4.636819496	5.19255172	4.759253665	4.930471997	4.578231755	4.742082667	4.82908003	4.363277886	4.155390465	5.34753869	4.607190942	5.236604368	5.114410824	4.369512888	4.533969367	5.050518765	4.542466894	transmembrane protein 25	GO:0005575/GO:0003674/GO:0031224/GO:0110165/GO:0005576/GO:0016020/GO:0008150/GO:0005886/GO:0071944/GO:0016021	IEA/ND	CC/MF/BP	PF08205	Tmem25	Q9DCF1		mmu:71687	ko:K22652
ENSMUSG00000002043	5.391744553	5.970343656	5.702796238	5.659719472	5.591674286	5.4901739	5.338645076	5.211230797	5.11160611	4.831523082	5.656407595	5.887152771	5.611328663	6.036969579	5.726190243	5.484601057	5.88091453	5.78534014	5.379030913	5.690685172	trafficking protein particle complex 6A	GO:0051641/GO:0008150/GO:0006810/GO:0012505/GO:0006996/GO:0043473/GO:0005802/GO:0016192/GO:0051179/GO:0044085/GO:0016050/GO:0051234/GO:0009987/GO:0046907/GO:0070925/GO:0043231/GO:0032438/GO:0005801/GO:0048193/GO:0005575/GO:0071840/GO:0065009/GO:0033059/GO:0016043/GO:0050790/GO:0005886/GO:0048753/GO:0043229/GO:0005794/GO:0071944/GO:0065007/GO:0051649/GO:0043226/GO:1903232/GO:0051336/GO:0005622/GO:…	IBA/IEA/IMP	BP/CC	PF04051	Trappc6a	Q78XR0		mmu:67091	ko:K20304
ENSMUSG00000002052	6.780475129	7.176050175	6.761246689	7.101969558	7.628775046	7.184317974	7.22074295	7.143471525	6.704377635	6.893227657	6.727782037	7.025055494	7.244989716	6.818348106	7.563343551	7.316156541	6.69027277	6.780459528	7.553492335	7.154240797	SPT6 histone chaperone and transcription elongation factor	GO:0097159/GO:0031323/GO:0044238/GO:0002637/GO:0090304/GO:0016043/GO:0015931/GO:0032786/GO:0051223/GO:1901360/GO:1905268/GO:0002682/GO:0051254/GO:0043227/GO:0010556/GO:0044237/GO:0002703/GO:0051179/GO:0002285/GO:0019222/GO:0006357/GO:0051252/GO:0071840/GO:0050864/GO:0007275/GO:0051276/GO:0071824/GO:0071704/GO:0032259/GO:0009059/GO:0051249/GO:0051172/GO:0006955/GO:0044249/GO:0110165/GO:0006913/GO:…	IEA/IMP/IBA/ISO/IPI	MF/BP/CC	PF14633/PF14632/PF14641/PF14635/PF17674/PF14639/PF00575	Supt6	Q3UWU8/Q3TY72/Q62383		mmu:20926	ko:K11292
ENSMUSG00000002055	4.526402154	4.301783025	4.344896188	4.263456339	4.704945332	4.305979435	4.972281457	4.531449998	4.713147703	4.50872613	4.214061662	4.292328419	4.466898	4.224253071	4.680027483	4.718187905	4.299300465	4.503659461	4.426519606	4.273616127	sperm associated antigen 5	GO:0022402/GO:0043228/GO:0090224/GO:0043226/GO:0030010/GO:0043232/GO:0000280/GO:0000922/GO:0000775/GO:0044085/GO:0051640/GO:0043229/GO:0032886/GO:0099080/GO:0099513/GO:0005856/GO:0044087/GO:0015630/GO:0051493/GO:1902117/GO:0005622/GO:0051495/GO:0051234/GO:0090235/GO:0000819/GO:0010564/GO:0034451/GO:0015631/GO:0005815/GO:0110165/GO:0034613/GO:0000776/GO:0005874/GO:0008150/GO:0000278/GO:0098813/GO:…	IMP/IEA/ISO/IDA	BP/CC/MF		Spag5	Q7TME2		mmu:54141	ko:K21764
ENSMUSG00000002058	6.188746334	6.501850161	6.12948185	6.434277995	6.515174907	6.243101173	6.396404254	6.208024674	6.297935474	5.99370456	6.36513818	6.308881164	6.530256014	5.993473796	6.11420538	6.438959994	5.995824837	6.16843679	6.446333111	6.620308466	unc-119 lipid binding chaperone	GO:0090148/GO:0019220/GO:0009893/GO:0019222/GO:0051173/GO:0019538/GO:0000278/GO:1903047/GO:0051171/GO:0061098/GO:0009987/GO:1900186/GO:0043232/GO:0110165/GO:0061640/GO:0006810/GO:0000281/GO:0065007/GO:0065009/GO:0045184/GO:0045859/GO:0045937/GO:0000910/GO:0032270/GO:1901564/GO:0042886/GO:0051051/GO:0051234/GO:0031401/GO:0032268/GO:0051128/GO:0140014/GO:0022402/GO:0003008/GO:0010604/GO:0031325/GO:…	IBA/ISO/IEA/IMP/IPI	BP/CC/MF	PF05351	Unc119	B1AQD9/B1AQD7/Q9Z2R6/Q3V299		mmu:22248	ko:K23539
ENSMUSG00000002059	4.768901537	4.823768266	4.520325729	4.555405427	4.778176085	4.232859502	4.310472012	4.57628833	4.476008932	4.542186312	4.847207392	4.478307445	4.359440776	4.793560291	4.650398824	4.182301651	4.431933339	4.587505766	4.967980699	4.466944967	RAB34 member RAS oncogene family	GO:0022607/GO:0046907/GO:0023051/GO:0044085/GO:0071705/GO:0002790/GO:0072659/GO:1905171/GO:0016043/GO:0046903/GO:0048193/GO:0007034/GO:0019882/GO:0016020/GO:0051641/GO:0032561/GO:0008150/GO:0001882/GO:0042742/GO:0045184/GO:0071840/GO:0080134/GO:0043231/GO:0005794/GO:0019001/GO:0006996/GO:0051049/GO:0033365/GO:0008589/GO:1905161/GO:0019725/GO:0032550/GO:0017111/GO:0007033/GO:0033036/GO:0007165/GO:…	IBA/IMP/ISO/IGI/IDA/IEA/IPI	BP/CC/MF	PF00071	Rab34	Q0PD20/Q64008		mmu:19376	ko:K07921
ENSMUSG00000002064	6.603883043	6.727990849	6.468447697	6.877868588	6.684779125	6.483485205	6.603389193	6.894499922	6.67671287	6.618224139	6.671090622	6.51917574	6.691356577	6.83837511	6.751004832	6.660695049	6.711776045	6.693899274	6.329530667	6.540425026	stromal cell derived factor 2	GO:0044265/GO:0071218/GO:1901576/GO:0042221/GO:0044249/GO:0044267/GO:0010498/GO:0044257/GO:0005575/GO:0012505/GO:0006950/GO:0036211/GO:0043226/GO:0006508/GO:0005737/GO:0044260/GO:0044248/GO:0070085/GO:0071704/GO:0008150/GO:0043231/GO:0006515/GO:0070887/GO:0051788/GO:0034976/GO:0033554/GO:1901698/GO:1901575/GO:0004169/GO:0035269/GO:0051716/GO:0035268/GO:0009059/GO:0006493/GO:0044237/GO:0043412/GO:…	IBA/IEA	BP/CC/MF	PF02815	Sdf2	Q9DCT5/A0A0R4IZW9		mmu:20316
ENSMUSG00000002068	4.45999555	4.430363562	4.311722052	4.495855935	4.879768104	4.199659363	4.74820557	4.42240299	4.489567932	4.578879165	4.154655451	4.292211742	4.354726313	4.40684199	4.846385922	4.776730272	4.142859294	4.187775819	4.69297525	4.356754513	cyclin E1	GO:1902554/GO:0051252/GO:0010629/GO:0051276/GO:0031399/GO:0065007/GO:0034645/GO:0007267/GO:0005622/GO:0015630/GO:0007346/GO:0004693/GO:0006725/GO:0010605/GO:0032991/GO:0010564/GO:0051253/GO:0003824/GO:1901576/GO:0006796/GO:0006807/GO:0016310/GO:0031974/GO:0016740/GO:1901360/GO:1901362/GO:1901564/GO:1901987/GO:0043412/GO:0044238/GO:0007049/GO:0031326/GO:0010468/GO:0034641/GO:0051726/GO:0004672/GO:…	ISO/IGI/IBA/IMP/IDA/IPI/ISS/IEA	CC/BP/MF	PF02984/PF00134	Ccne1	Q61457	path:mmu05226/path:mmu05215/path:mmu04114/path:mmu05162/path:mmu05206/path:mmu05203/path:mmu05161/path:mmu04115/path:mmu04151/path:mmu04218/path:mmu05165/path:mmu05169/path:mmu04110/path:mmu04934/path:mmu05200/path:mmu05222/path:mmu05166	mmu:12447	ko:K06626	Gastric cancer - Mus musculus (house mouse)/Prostate cancer - Mus musculus (house mouse)/Oocyte meiosis - Mus musculus (house mouse)/Measles - Mus musculus (house mouse)/MicroRNAs in cancer - Mus musculus (house mouse)/Viral carcinogenesis - Mus musculus (house mouse)/Hepatitis B - Mus musculus (house mouse)/p53 signaling pathway - Mus musculus (house mouse)/PI3K-Akt signaling pathway - Mus muscu…
ENSMUSG00000002083	2.286630677	2.531937853	2.549459257	2.761269881	2.615154358	2.367666852	2.538027061	2.443475376	2.352661788	2.232474946	2.836354731	2.909549916	2.530601808	2.642761872	2.561676592	2.60006544	2.471869732	2.635108504	2.350365779	2.717326115	BCL2 binding component 3	GO:0006508/GO:0065008/GO:0034976/GO:0034613/GO:0048518/GO:0010941/GO:0015833/GO:0006807/GO:0051345/GO:0051480/GO:0098771/GO:0061024/GO:0015031/GO:0033157/GO:0090559/GO:0033554/GO:0097553/GO:0097190/GO:0055085/GO:1900740/GO:0060255/GO:0006810/GO:0006996/GO:0010822/GO:1901030/GO:0090087/GO:0098662/GO:0042981/GO:0019538/GO:0098660/GO:0050790/GO:1900739/GO:0090200/GO:0019222/GO:0019725/GO:0060402/GO:…	ISO/IMP/IBA/ISS/IGI/IEA/IDA/IPI	BP/CC/MF	PF15826	Bbc3	B2RVL4/Q99ML1	path:mmu05016/path:mmu05162/path:mmu04215/path:mmu05200/path:mmu01524/path:mmu04390/path:mmu05210/path:mmu04115/path:mmu04210	mmu:170770	ko:K10132	Huntington disease - Mus musculus (house mouse)/Measles - Mus musculus (house mouse)/Apoptosis - multiple species - Mus musculus (house mouse)/Pathways in cancer - Mus musculus (house mouse)/Platinum drug resistance - Mus musculus (house mouse)/Hippo signaling pathway - Mus musculus (house mouse)/Colorectal cancer - Mus musculus (house mouse)/p53 signaling pathway - Mus musculus (house mouse)/Apo…
ENSMUSG00000002100	0.335776494	0.307476886	0.294892023	0.425044669	0.576686365	0.241952316	0.318865271	0.213875883	0.245760909	0.484450908	0.179910349	0.306798689	0.491544488	0.200353893	0.393162824	0.536274758	0.225353471	0.394511301	0.32118022	0.211354666	myosin binding protein C cardiac	GO:0003012/GO:0043226/GO:0061061/GO:0005859/GO:0043229/GO:0003008/GO:0043169/GO:0003674/GO:0006936/GO:0060537/GO:0060048/GO:0009653/GO:0030239/GO:0007010/GO:0048739/GO:0048869/GO:0030240/GO:0003013/GO:0097435/GO:0048646/GO:0048731/GO:0060415/GO:0072359/GO:0005856/GO:0014866/GO:0005863/GO:0009888/GO:0009887/GO:0065003/GO:0060047/GO:0007015/GO:0030029/GO:0048729/GO:0014706/GO:0031430/GO:0048644/GO:…	IMP/IDA/IBA/ISO/IEA/TAS/IPI	BP/CC/MF	PF07679/PF18362/PF00041	Mybpc3	Q3UIK0	path:mmu05414/path:mmu05410	mmu:17868	ko:K12568	Dilated cardiomyopathy - Mus musculus (house mouse)/Hypertrophic cardiomyopathy - Mus musculus (house mouse)
ENSMUSG00000002102	8.866850946	9.107115558	8.862698822	8.899977696	9.133508046	8.808981504	9.037380668	8.874981021	8.835060366	8.939554207	8.818337981	8.84934438	9.124157578	8.657964773	9.28504282	9.184851962	8.9559221	8.875682453	9.297316608	8.977837431	proteasome (prosome macropain) 26S subunit ATPase 3	GO:0006355/GO:0043903/GO:0010557/GO:0044249/GO:0000502/GO:0006351/GO:0031326/GO:0043922/GO:0007275/GO:0051252/GO:0050794/GO:1902494/GO:0010556/GO:0051173/GO:0048525/GO:0016070/GO:0016787/GO:0097659/GO:0000166/GO:0043921/GO:0031328/GO:0050789/GO:0006807/GO:0051128/GO:0050792/GO:2001141/GO:0099080/GO:0010604/GO:0034622/GO:1901576/GO:0032991/GO:0043933/GO:0006352/GO:0051254/GO:0006357/GO:0008150/GO:…	IBA/ISO/IDA/IMP/IEA	BP/CC/MF	PF00004/PF16450/PF17862	Psmc3	O88685/Q3TKG4	path:mmu05169/path:mmu03050/path:mmu05014/path:mmu05020/path:mmu05012/path:mmu05022/path:mmu05017/path:mmu05010/path:mmu05016	mmu:19182	ko:K03065	Epstein-Barr virus infection - Mus musculus (house mouse)/Proteasome - Mus musculus (house mouse)/Amyotrophic lateral sclerosis - Mus musculus (house mouse)/Prion disease - Mus musculus (house mouse)/Parkinson disease - Mus musculus (house mouse)/Pathways of neurodegeneration - multiple diseases - Mus musculus (house mouse)/Spinocerebellar ataxia - Mus musculus (house mouse)/Alzheimer disease - M…
ENSMUSG00000002103	5.883848095	5.7665546	5.983823717	5.819572203	5.494481434	5.899991644	5.728689275	5.506594051	5.696584344	5.793097875	6.024558846	5.940784462	5.572776941	5.780912215	5.596326296	5.377127352	5.86621505	5.928847417	5.426896925	5.854954254	acid phosphatase 2 lysosomal	GO:0000323/GO:0016043/GO:0005737/GO:0001501/GO:0016787/GO:0080171/GO:0003824/GO:0003674/GO:0005764/GO:0016791/GO:0016021/GO:0097708/GO:0042578/GO:0031224/GO:0016236/GO:0005773/GO:0043227/GO:0031410/GO:0043226/GO:0031982/GO:0016788/GO:0042221/GO:0110165/GO:0042995/GO:0071944/GO:0043005/GO:0044237/GO:0071840/GO:0043229/GO:0006914/GO:0009056/GO:0043231/GO:0008150/GO:0044248/GO:0007040/GO:0009987/GO:…	IDA/IMP/ISO/IEA	CC/BP/MF	PF00328	Acp2	P24638/Q3UZN1	path:mmu04142/path:mmu00740/path:mmu01100	mmu:11432	ko:K14410	Lysosome - Mus musculus (house mouse)/Riboflavin metabolism - Mus musculus (house mouse)/Metabolic pathways - Mus musculus (house mouse)
ENSMUSG00000002104	1.362234891	1.642852238	1.909369529	1.607435933	1.583224623	1.502566075	1.337539827	1.3482523	1.282498157	1.465805504	1.37537547	1.292114362	1.705888916	2.003177436	1.739500179	2.074112773	1.60636861	1.756439533	1.65862687	1.473892914	receptor-associated protein of the synapse	GO:0005575/GO:0023052/GO:0045202/GO:0023056/GO:0043169/GO:0010646/GO:1901214/GO:0043228/GO:0005813/GO:0023051/GO:1900075/GO:0010647/GO:0098590/GO:0043226/GO:0043227/GO:0071944/GO:0005515/GO:0097060/GO:0043229/GO:0005814/GO:0005856/GO:0009987/GO:1900073/GO:0071840/GO:0070997/GO:0007271/GO:0005829/GO:0003674/GO:0099537/GO:0065008/GO:0045184/GO:0031594/GO:0007274/GO:0030054/GO:0070727/GO:0065007/GO:…	IEA/ISO/IMP/IDA/IPI	CC/BP/MF	PF13639/PF17874/PF10579	Rapsn	P12672		mmu:19400	ko:K24924
ENSMUSG00000002105	5.672143394	5.703076851	5.607089997	5.475935971	5.701811714	5.782621368	5.540293982	5.390031648	5.510465905	5.523897473	5.265425652	5.61671161	5.614328857	5.908909628	6.106390239	5.844639985	5.534021675	5.404421802	5.937885615	5.36918887	solute carrier family 39 (metal ion transporter) member 13	GO:0043231/GO:0043229/GO:0005737/GO:0046915/GO:0061448/GO:0051234/GO:0009888/GO:0072507/GO:0043227/GO:0071944/GO:0005622/GO:0065007/GO:0046873/GO:0070838/GO:0071577/GO:0009987/GO:0005794/GO:0008324/GO:0032502/GO:0055085/GO:0065008/GO:0072503/GO:0055065/GO:0005783/GO:0006810/GO:0042802/GO:0008150/GO:0030003/GO:0005385/GO:0048856/GO:0012505/GO:0042803/GO:0042592/GO:0034220/GO:0050801/GO:0048471/GO:…	ISO/IDA/IBA/IMP/IC/IEA	CC/MF/BP	PF02535	Slc39a13	Q8BZH0/B2RQ45	path:mmu05010/path:mmu05012	mmu:68427	ko:K14719	Alzheimer disease - Mus musculus (house mouse)/Parkinson disease - Mus musculus (house mouse)
ENSMUSG00000002107	6.076132241	5.853675614	6.402787647	6.075064607	5.759704674	6.449762064	6.172071032	6.093693707	6.174723788	5.819530326	6.433547356	6.040443474	5.858638879	5.818057371	5.921657551	6.19322644	6.200714127	6.043694102	5.880859213	6.316347974	CUGBP Elav-like family member 2	GO:0003676/GO:0003674/GO:0000375/GO:0097159/GO:0006807/GO:0016043/GO:0008150/GO:0043484/GO:0043933/GO:0000377/GO:0090304/GO:0000398/GO:0071826/GO:0000245/GO:0046483/GO:0010468/GO:0003723/GO:0048024/GO:0044238/GO:0071704/GO:0006397/GO:0008152/GO:0044237/GO:0110165/GO:0044085/GO:0080090/GO:0006725/GO:0000381/GO:0005488/GO:0003729/GO:0022613/GO:0016071/GO:0010467/GO:1901360/GO:0000380/GO:0022607/GO:…	IBA/IEA/ISO/IDA/ISS	MF/BP/CC	PF00076	Celf2	S4R1S7/E9QA47/A0A0R4J2B0/Q9Z0H4		mmu:14007	ko:K13207
ENSMUSG00000002108	3.366299103	3.380129928	3.488381844	3.283498958	2.931479039	3.072535362	3.107094366	3.1912089	3.216697383	3.333646011	3.330135258	3.189569724	3.199700451	3.221672251	3.017871269	2.954443401	3.528613121	3.064609797	3.13017343	3.581101822	nuclear receptor subfamily 1 group H member 3	GO:0051254/GO:1903506/GO:1990837/GO:0010874/GO:0034641/GO:1990845/GO:0051252/GO:0005622/GO:0009891/GO:0006909/GO:0019219/GO:0048583/GO:0009059/GO:1905953/GO:0043231/GO:0019915/GO:0051173/GO:0051253/GO:0006950/GO:0019752/GO:0044212/GO:0005575/GO:0051179/GO:0006633/GO:0003690/GO:0046460/GO:0022600/GO:1903508/GO:0045934/GO:0032269/GO:0034145/GO:1905952/GO:0000981/GO:0001012/GO:0000976/GO:0065007/GO:…	IMP/ISO/IBA/IGI/IDA/TAS/IEA/IPI	BP/MF/CC	PF00104/PF00105	Nr1h3	Q91X41/Q9Z0Y9	path:mmu03320/path:mmu04932/path:mmu05160/path:mmu04931	mmu:22259	ko:K08536	PPAR signaling pathway - Mus musculus (house mouse)/Non-alcoholic fatty liver disease - Mus musculus (house mouse)/Hepatitis C - Mus musculus (house mouse)/Insulin resistance - Mus musculus (house mouse)
ENSMUSG00000002109	1.362110123	1.320883134	1.221017378	1.019862828	0.971921574	1.113418049	0.999210168	1.077918271	1.193241511	1.116884619	0.974207056	1.410551356	1.352015387	1.01601181	1.021568091	1.032689428	1.249155107	1.336248718	1.140386595	1.279924106	damage specific DNA binding protein 2	GO:0032446/GO:0008150/GO:0051716/GO:0070914/GO:0006259/GO:0006281/GO:0006325/GO:0031981/GO:0006290/GO:0044260/GO:0016043/GO:0009416/GO:0071214/GO:0043170/GO:0005575/GO:0016569/GO:0031974/GO:0031465/GO:0051276/GO:0043227/GO:1901363/GO:0030054/GO:0043226/GO:1901360/GO:0097159/GO:0005488/GO:0051865/GO:0008152/GO:1990234/GO:0043233/GO:0110165/GO:0033554/GO:0006974/GO:0016740/GO:0070013/GO:0070647/GO:…	ISO/IMP/IEA/IBA	BP/CC/MF	PF00400	Ddb2	Q99J79	path:mmu05225/path:mmu04120/path:mmu05217/path:mmu05218/path:mmu05222/path:mmu05220/path:mmu05213/path:mmu04115/path:mmu05202/path:mmu05226/path:mmu05161/path:mmu05216/path:mmu05169/path:mmu05223/path:mmu05214/path:mmu05210/path:mmu05200/path:mmu05224/path:mmu05212/path:mmu03420	mmu:107986	ko:K10140	Hepatocellular carcinoma - Mus musculus (house mouse)/Ubiquitin mediated proteolysis - Mus musculus (house mouse)/Basal cell carcinoma - Mus musculus (house mouse)/Melanoma - Mus musculus (house mouse)/Small cell lung cancer - Mus musculus (house mouse)/Chronic myeloid leukemia - Mus musculus (house mouse)/Endometrial cancer - Mus musculus (house mouse)/p53 signaling pathway - Mus musculus (house…
ENSMUSG00000002111	4.628399547	5.689471451	5.638642979	6.204490138	4.586411023	4.628118391	4.29723208	5.503766503	4.332801263	4.575068728	5.675256746	5.572014619	4.53019387	6.252905815	4.619849592	4.841333795	6.272017243	6.006906417	4.859227165	5.840334513	spleen focus forming virus (SFFV) proviral integration oncogene	GO:2000113/GO:0002320/GO:0009892/GO:2001141/GO:0002262/GO:0002376/GO:0006725/GO:0048856/GO:0009890/GO:1902679/GO:0009058/GO:0050794/GO:0009889/GO:2000026/GO:2001251/GO:0007165/GO:1902895/GO:0045814/GO:1902275/GO:0033043/GO:0045893/GO:0034641/GO:1901576/GO:0048731/GO:0007154/GO:0032259/GO:0045892/GO:1902262/GO:0045637/GO:0031400/GO:0006996/GO:0001228/GO:0006807/GO:0032269/GO:0001944/GO:1901984/GO:…	ISO/IMP/IDA/IBA/IEA/IPI/IC	BP/MF/CC	PF00178	Spi1	P17433/Q3U5L4	path:mmu05200/path:mmu05166/path:mmu05221/path:mmu05202/path:mmu04380	mmu:20375	ko:K09438	Pathways in cancer - Mus musculus (house mouse)/Human T-cell leukemia virus 1 infection - Mus musculus (house mouse)/Acute myeloid leukemia - Mus musculus (house mouse)/Transcriptional misregulation in cancer - Mus musculus (house mouse)/Osteoclast differentiation - Mus musculus (house mouse)
ENSMUSG00000002129	3.362977107	3.015136309	3.357481681	3.246518568	3.079247743	3.702665167	3.31512372	3.159092999	3.583202205	3.156922845	3.245462486	3.034948064	3.288115762	3.293484433	3.146678148	2.982924248	3.002587578	3.448976255	3.029567861	3.283134557	splicing factor 3a subunit 1	GO:0005681/GO:0090304/GO:0032991/GO:0005682/GO:0097525/GO:0005684/GO:0034622/GO:0006139/GO:0005654/GO:0003676/GO:0043229/GO:0006396/GO:0016070/GO:0097159/GO:1901360/GO:1990904/GO:0016604/GO:0046483/GO:0016071/GO:1901363/GO:0003674/GO:0071001/GO:0065003/GO:0005687/GO:0016607/GO:0031974/GO:0120114/GO:0031981/GO:0046540/GO:0005688/GO:0022613/GO:0071013/GO:0022618/GO:0043231/GO:0030532/GO:0120115/GO:…	IBA/ISO/IEA	CC/BP/MF	PF00240/PF12230/PF01805	Sf3a1	Q3TVM1/Q8K4Z5	path:mmu03040	mmu:67465	ko:K12825	Spliceosome - Mus musculus (house mouse)
ENSMUSG00000002147	3.194793743	3.235068708	3.694266092	3.626969464	3.233494136	3.058156091	3.348488746	3.32526945	3.040653856	3.194612132	3.795940772	3.844712105	2.954706312	3.639669561	3.106975828	3.356009139	3.899115818	3.752120453	3.325405218	4.098883913	signal transducer and activator of transcription 6	GO:1901698/GO:0010468/GO:0140110/GO:0002637/GO:0044249/GO:0010628/GO:0008150/GO:0045893/GO:0016064/GO:0051252/GO:0002639/GO:1901701/GO:0016020/GO:0050871/GO:0006725/GO:0035710/GO:0002250/GO:0065007/GO:0002562/GO:0002208/GO:0048732/GO:1901653/GO:0006807/GO:1901652/GO:0010467/GO:0032774/GO:0002521/GO:0010556/GO:0051253/GO:1901699/GO:0034097/GO:0002699/GO:0007167/GO:0034654/GO:0043226/GO:0009653/GO:…	ISO/IBA/IGI/IMP/IDA/IEA/IPI	BP/MF/CC	PF02864/PF14596/PF02865/PF01017/PF00017	Stat6	P52633	path:mmu05161/path:mmu05200/path:mmu05321/path:mmu04630/path:mmu04659/path:mmu04658/path:mmu04217	mmu:20852	ko:K11225	Hepatitis B - Mus musculus (house mouse)/Pathways in cancer - Mus musculus (house mouse)/Inflammatory bowel disease - Mus musculus (house mouse)/JAK-STAT signaling pathway - Mus musculus (house mouse)/Th17 cell differentiation - Mus musculus (house mouse)/Th1 and Th2 cell differentiation - Mus musculus (house mouse)/Necroptosis - Mus musculus (house mouse)
ENSMUSG00000002190	4.836295828	4.007911721	4.657496913	4.119881815	4.627141706	5.003691792	4.608899376	4.240604394	4.884066796	4.651232701	4.583050855	4.656915989	4.491036143	4.233775154	4.739290426	4.990878238	4.391106051	3.981292394	4.455134705	3.812084275	calmegin	GO:0022607/GO:0003674/GO:0019953/GO:0016043/GO:0000003/GO:0022414/GO:0031975/GO:0043229/GO:0008037/GO:0023052/GO:0035966/GO:0005515/GO:0032504/GO:0043169/GO:0035036/GO:0048609/GO:0042175/GO:0046872/GO:0030154/GO:0043227/GO:0003006/GO:0043226/GO:0033554/GO:0007339/GO:0034976/GO:0035967/GO:0008150/GO:0071944/GO:0005622/GO:0030968/GO:0005509/GO:0051321/GO:0051082/GO:0031967/GO:0012505/GO:0005488/GO:…	IMP/IDA/IEA/IBA/ISO/IGI/IPI	BP/MF/CC	PF00262	Clgn	P52194		mmu:12745	ko:K09551
ENSMUSG00000002205	5.318211227	5.617394462	5.689464645	5.636053805	5.586119168	5.675837879	5.504029186	5.562960164	5.360364153	5.305356862	5.523137942	5.710608916	5.721075943	5.646653783	5.561237606	5.412277584	5.757613574	5.598008007	5.301279168	5.722649059	vaccinia related kinase 3	GO:0010562/GO:0036211/GO:0044260/GO:0008144/GO:0009968/GO:0005575/GO:0043229/GO:0008150/GO:0035639/GO:0009987/GO:0008152/GO:0044238/GO:0044267/GO:0009892/GO:0007154/GO:0045936/GO:0044237/GO:0031324/GO:0043170/GO:0005634/GO:0043227/GO:0043412/GO:0003824/GO:0032555/GO:0031981/GO:0006807/GO:0006793/GO:0043226/GO:0005622/GO:0045937/GO:0036094/GO:0032516/GO:0031325/GO:0043666/GO:0065009/GO:0006464/GO:…	IPI/IEA/IDA/ISO/IBA	BP/MF/CC	PF00069	Vrk3	Q3TAR6/Q8K3G5		mmu:101568	ko:K08816
ENSMUSG00000002210	5.555773166	5.370981879	4.947440225	5.051463837	5.514988255	5.190436627	5.300364777	5.386308513	5.181547884	5.489739159	5.500893529	5.161584884	5.198232605	5.516862501	5.628328552	5.635801867	5.412096524	5.209608925	5.45283351	5.395919769	smg-9 homolog nonsense mediated mRNA decay factor (C. elegans)	GO:0032501/GO:0044260/GO:0006139/GO:0048519/GO:0046483/GO:0009056/GO:0006725/GO:0048513/GO:0060255/GO:0005488/GO:0008152/GO:0034641/GO:0001701/GO:0044270/GO:0016070/GO:0046700/GO:0048731/GO:0048856/GO:0090304/GO:0006402/GO:0007417/GO:0000184/GO:0032502/GO:0010468/GO:0016071/GO:0044265/GO:0150063/GO:0005515/GO:1901360/GO:0000956/GO:0001654/GO:0048880/GO:0019439/GO:0005575/GO:0044238/GO:0065007/GO:…	IMP/ISO/IBA	BP/MF/CC	PF10220	Smg9	Q9DB90		mmu:71997	ko:K18735
ENSMUSG00000002222	5.174522723	4.58547892	5.637562902	4.799373228	4.431598116	5.482306182	5.381081947	4.649081705	5.560901927	5.67343623	5.347299671	5.16706046	4.747771599	4.724975285	4.412559982	4.917114176	4.779092782	4.9644844	5.081570272	5.171506233	required for meiotic nuclear division 5 homolog A	GO:0043161/GO:0046872/GO:0043170/GO:0031981/GO:0044267/GO:0005575/GO:0030163/GO:0032991/GO:0019538/GO:0044265/GO:0006511/GO:0043169/GO:0006508/GO:0016740/GO:0019787/GO:0009056/GO:0043233/GO:0004842/GO:0044257/GO:0044260/GO:0044237/GO:0043632/GO:0005622/GO:0009987/GO:0005488/GO:0031974/GO:0010498/GO:0003824/GO:0034657/GO:0008150/GO:0043231/GO:0044248/GO:1901564/GO:0000151/GO:0051603/GO:0044238/GO:…	IBA/IEA/ISO	BP/MF/CC	PF10607/PF13445	Rmnd5a	Q80YQ8		mmu:68477	ko:K23333
ENSMUSG00000002227	2.274015858	2.439579999	1.997473346	2.329664912	2.02687943	2.15419018	1.919075462	2.23121225	1.888217412	1.883226054	2.594177268	2.052466653	2.202957155	2.494532651	1.939008939	2.082761042	2.616566105	2.318871844	1.999928861	2.340931882	Mov10 RISC complex RNA helicase	GO:0003676/GO:0007275/GO:0035770/GO:1901575/GO:0043043/GO:0008150/GO:1901564/GO:0009058/GO:0036464/GO:1903311/GO:0016818/GO:0008152/GO:0036094/GO:0016817/GO:0071840/GO:0006807/GO:0019222/GO:2000026/GO:0016887/GO:0035195/GO:0040029/GO:0030030/GO:1901566/GO:0045595/GO:0017076/GO:0043168/GO:0016458/GO:0050794/GO:0080090/GO:0030154/GO:0022604/GO:0030554/GO:0031047/GO:0019219/GO:0043487/GO:1901576/GO:…	IBA/IMP/ISO/IEA/IDA/IPI	MF/BP/CC	PF13087	Mov10	Q3UD86/P23249/E9PW39		mmu:17454	ko:K18422
ENSMUSG00000002228	2.119853221	2.295503976	2.175800512	2.379117658	2.583485537	2.455402593	2.566637074	2.276286969	2.388673331	2.271588753	1.9994611	2.392433411	2.417797922	2.562273576	2.530865587	2.364132975	1.996434558	2.318972964	2.849528172	2.338254633	protein phosphatase 1J	GO:0016787/GO:0140096/GO:0019538/GO:1901564/GO:0016788/GO:0016791/GO:0004721/GO:0005488/GO:0071704/GO:0043170/GO:0006793/GO:0003824/GO:0036211/GO:0016311/GO:0004722/GO:0003674/GO:0044238/GO:0044237/GO:0008152/GO:0042578/GO:0004724/GO:0006464/GO:0005515/GO:0009987/GO:0043412/GO:0008150/GO:0006807/GO:0044260/GO:0006796/GO:0006470/GO:0044267	IEA/IDA/IBA/IPI	MF/BP	PF00481	Ppm1j	Q149T7		mmu:71887	ko:K17504
ENSMUSG00000002233	5.863540606	6.954653706	6.770560346	7.213177597	6.188059862	6.016817862	5.820499139	6.236287924	5.770871622	5.471363458	7.043331389	7.102573643	5.864887217	7.104524083	5.803492161	6.056759716	7.373796966	7.004307913	6.15380013	7.071629171	ras homolog family member C	GO:0008150/GO:0017111/GO:0016477/GO:0051270/GO:0022402/GO:0051128/GO:0044085/GO:0051017/GO:0017076/GO:0044089/GO:0019900/GO:0043232/GO:0016043/GO:0051130/GO:0051179/GO:0051260/GO:0048518/GO:0007266/GO:0030952/GO:0032231/GO:0140014/GO:0065007/GO:0019899/GO:0043297/GO:0043254/GO:0001882/GO:0016787/GO:0050789/GO:0043229/GO:0010638/GO:0030950/GO:0048522/GO:0007163/GO:0007154/GO:0032233/GO:0008360/GO:…	IBA/ISO/IMP/IDA/IEA/IPI	BP/MF/CC	PF00071	Rhoc	Q62159		mmu:11853	ko:K07857
ENSMUSG00000002249	2.763272365	3.540747971	3.298705979	3.204557563	2.66163686	2.609446069	2.384330621	3.154692356	2.573823298	2.676594057	3.270012133	3.311184192	2.460833766	3.098479645	2.891608767	2.720298763	2.792902375	3.1567755	2.799124901	3.415145174	TEA domain family member 3	GO:0071704/GO:0051252/GO:1903506/GO:0009891/GO:0006725/GO:0032991/GO:0034641/GO:0006139/GO:1903508/GO:0031325/GO:0032774/GO:0065007/GO:0009889/GO:0044271/GO:0009058/GO:0045935/GO:0006355/GO:0031323/GO:0009059/GO:1990837/GO:0010468/GO:0051240/GO:0044238/GO:0044237/GO:0051254/GO:0003674/GO:0045165/GO:2000036/GO:1902680/GO:0009893/GO:0044260/GO:0006366/GO:0098722/GO:0097659/GO:0010556/GO:0010467/GO:…	IDA/IBA/IEA/IGI/ISO	BP/CC/MF	PF17725/PF01285	Tead3	F8VPU0/P70210	path:mmu04392/path:mmu04390	mmu:21678	ko:K09448	Hippo signaling pathway - multiple species - Mus musculus (house mouse)/Hippo signaling pathway - Mus musculus (house mouse)
ENSMUSG00000002250	5.357559409	5.412919232	5.228284419	5.872105846	5.470929848	5.280409359	5.55450628	5.792387538	5.314782979	5.508679198	5.617196476	5.662059842	5.068801167	5.722623539	5.526773025	5.373302129	5.423167736	5.297678683	5.923300735	5.691633157	peroxisome proliferator activator receptor delta/RIKEN cDNA 1810013A23 gene	GO:0009890/GO:0004953/GO:0009889/GO:0004955/GO:0044271/GO:0051253/GO:1990837/GO:0044260/GO:0004954/GO:0005575/GO:0009888/GO:2000026/GO:1901363/GO:0001012/GO:0051252/GO:0043170/GO:0045184/GO:0031348/GO:0044255/GO:0023051/GO:0019222/GO:2000112/GO:0004930/GO:0031347/GO:0002237/GO:0044249/GO:0009987/GO:0032501/GO:0044282/GO:1901564/GO:0031328/GO:0009755/GO:0044798/GO:0010817/GO:0010888/GO:0031327/GO:…	IDA/TAS/ISO/IBA/IMP/IEA/IEP/IGI/NAS/IPI	BP/MF/CC	PF00104/PF00105	Ppard/1810013A23Rik	Q546I3/P35396	path:mmu05200/path:mmu03320/path:mmu04310/path:mmu05221	mmu:19015	ko:K04504	Pathways in cancer - Mus musculus (house mouse)/PPAR signaling pathway - Mus musculus (house mouse)/Wnt signaling pathway - Mus musculus (house mouse)/Acute myeloid leukemia - Mus musculus (house mouse)
ENSMUSG00000002257	2.868945491	2.78267762	2.726567093	3.09922265	2.860834029	2.732596431	2.755538772	3.164159197	2.890608245	3.047739866	3.166842248	2.711085452	2.509271461	3.031204258	3.024118473	2.980998607	2.575779516	2.763789282	2.688902635	2.961983636	differentially expressed in FDCP 6	GO:0043229/GO:0110165/GO:0043231/GO:0043233/GO:0070013/GO:0043226/GO:0043232/GO:0070161/GO:0005886/GO:0030054/GO:0071944/GO:0043227/GO:0005575/GO:0016020/GO:0005829/GO:0042995/GO:0005737/GO:0005654/GO:0005911/GO:0031974/GO:0003674/GO:0005856/GO:0005488/GO:0005622/GO:0005515/GO:0005634/GO:0031981/GO:0043228	IEA/ISO/IBA/IDA/IPI	CC/MF	PF00169	Def6	A0A0R4IZX1/Q8C2K1		mmu:23853	ko:K20072
ENSMUSG00000002265	6.580686542	6.041481258	6.360092233	5.941788378	5.963710849	7.046238962	6.933794732	6.003099538	7.111763433	6.824245747	6.381886865	6.267944849	6.451817097	5.927009885	6.229506178	5.908694814	6.076529537	6.47002028	6.346311633	6.300247637	paternally expressed 3	GO:0009987/GO:0051172/GO:0005575/GO:0006915/GO:0048523/GO:2001141/GO:0008150/GO:0048522/GO:0003676/GO:0008152/GO:1901363/GO:0005737/GO:0005634/GO:0045892/GO:2000112/GO:0009890/GO:0045934/GO:0010558/GO:0031326/GO:0044249/GO:0005622/GO:0045944/GO:0009891/GO:0019222/GO:0046483/GO:1903508/GO:0044260/GO:0065007/GO:0050794/GO:0097159/GO:0031325/GO:0043229/GO:0045893/GO:1901360/GO:0045935/GO:0000122/GO:…	IEA/IMP/IGI/IDA/IBA	BP/CC/MF	PF00096	Peg3	Q3URU2		mmu:18616	ko:K09230
ENSMUSG00000002274	8.032774439	8.299096122	7.721690206	8.471670655	8.549207391	8.086169171	8.121709592	7.92288634	7.913117535	7.93683987	7.883562993	8.091144237	8.141623774	8.52861318	8.656222814	8.775530941	8.152808301	8.252707603	8.264614698	8.169317342	meteorin glial cell differentiation regulator	GO:0031346/GO:0048468/GO:0048518/GO:0030030/GO:0000902/GO:0045664/GO:0048522/GO:0000904/GO:0030154/GO:0061564/GO:0005102/GO:0005488/GO:0005179/GO:0048666/GO:0048018/GO:0065007/GO:0003674/GO:0005575/GO:0005576/GO:0048869/GO:0031175/GO:0045597/GO:0032501/GO:0048667/GO:0048699/GO:0005515/GO:0060284/GO:0045595/GO:0120039/GO:2000026/GO:0051962/GO:0031344/GO:0048812/GO:0022603/GO:0030545/GO:0045666/GO:…	IBA/IDA/IEA	BP/MF/CC		Metrn	Q8C1Q4/A2RSN4		mmu:70083
ENSMUSG00000002279	6.242363369	6.081220849	5.766398532	6.223592127	6.283123368	6.349793756	6.011747394	5.926096211	5.649875731	5.854133576	5.774514493	6.123445589	6.151508476	6.116659885	6.382752954	6.019343966	6.155189913	6.262118707	6.341704231	6.054241279	lipase maturation factor 1	GO:0071840/GO:0006807/GO:0071944/GO:0006639/GO:0060193/GO:0005783/GO:0006638/GO:0005737/GO:0090181/GO:0006629/GO:0008152/GO:0005789/GO:0005622/GO:0006996/GO:0033036/GO:0016021/GO:0008150/GO:0061365/GO:0060191/GO:0071830/GO:0032984/GO:0071829/GO:0015833/GO:0005773/GO:0032987/GO:0050790/GO:0051004/GO:0016020/GO:0005575/GO:0080090/GO:0015031/GO:0031224/GO:0006464/GO:0043229/GO:0140352/GO:0016043/GO:…	IMP/IBA/IDA/IEA/ISO/IPI	BP/CC/MF	PF06762	Lmf1	Q3U3R4		mmu:76483	ko:K23555
ENSMUSG00000002280	5.173272487	5.213865303	5.051797892	5.507083088	5.157989366	4.762995838	5.004099844	5.419723158	4.859234131	5.330180453	5.076947389	4.918052839	5.085083255	5.362337413	5.207660965	4.939939718	5.214346198	5.005939452	5.631526799	5.055087301	cytosolic iron-sulfur assembly component 3	GO:0022607/GO:0019222/GO:0110165/GO:0051186/GO:0048869/GO:0097361/GO:0048878/GO:0006790/GO:0006950/GO:0005829/GO:0050789/GO:0033483/GO:0050896/GO:0048037/GO:0044249/GO:0042592/GO:0048731/GO:0048513/GO:0036293/GO:0009628/GO:0070482/GO:0071840/GO:0046872/GO:0032991/GO:0009987/GO:0048856/GO:0032501/GO:0051540/GO:0005737/GO:0005488/GO:0030154/GO:0009058/GO:0032502/GO:0005575/GO:0001666/GO:0031163/GO:…	IBA/ISO/IMP/IEA	BP/CC/MF	PF02906/PF02256	Ciao3	Q7TMW6		mmu:67563
ENSMUSG00000002289	3.419465287	3.944445242	4.218789834	4.740215303	3.521022245	3.376962484	3.618461181	3.956072177	3.039435678	3.352579629	4.680438749	4.305942437	3.609010983	4.425494729	3.455515492	3.705529777	4.719002998	5.064703525	3.491381672	4.481807491	angiopoietin-like 4	GO:0005576/GO:0005615/GO:0051336/GO:0048646/GO:0048519/GO:0005575/GO:0031669/GO:0048731/GO:0004857/GO:0051346/GO:0001568/GO:0001944/GO:0012501/GO:0048523/GO:0005515/GO:0060192/GO:0055090/GO:0003674/GO:0043067/GO:0003824/GO:0032502/GO:0032501/GO:0033554/GO:0051260/GO:0019222/GO:0051259/GO:0001525/GO:0051004/GO:0044092/GO:0051005/GO:0031667/GO:0035295/GO:0042981/GO:0031668/GO:0060191/GO:2000351/GO:…	IDA/ISO/IEA/NAS/IMP	CC/BP/MF	PF00147	Angptl4	Q9Z1P8	path:mmu04979/path:mmu03320	mmu:57875	ko:K08767	Cholesterol metabolism - Mus musculus (house mouse)/PPAR signaling pathway - Mus musculus (house mouse)
ENSMUSG00000002297	0.015888986	0.309761142	0.208996717	0.259562326	0.114720001	0.257817982	0.009249866	0.218735518	0.161047183	0.061135296	0.359118089	0.065561989	0.063076487	0.05862496	0.102820085	0.111400277	0.078041968	0.311209284	0.250468578	0.156914967	DBF4 zinc finger	GO:0045931/GO:0000278/GO:0044237/GO:0051726/GO:0003674/GO:0009987/GO:0005622/GO:0050794/GO:0050789/GO:0000280/GO:0010557/GO:0006275/GO:0030234/GO:1902808/GO:1901990/GO:0009058/GO:0008152/GO:0008270/GO:0019222/GO:0043539/GO:0030295/GO:0044238/GO:0045787/GO:0006261/GO:1902806/GO:0045740/GO:0044843/GO:0140096/GO:0110165/GO:1901992/GO:0009891/GO:0016773/GO:0006260/GO:0044249/GO:1900087/GO:1901360/GO:…	ISA/IEA/IBA/ISO/IDA	BP/MF/CC	PF00533/PF07535	Dbf4	Q9QZ41/B2RS44	path:mmu04110	mmu:27214	ko:K06629	Cell cycle - Mus musculus (house mouse)
ENSMUSG00000002307	5.229420775	5.023856908	5.108595024	5.199754759	4.926270132	4.975355054	4.873209095	5.078893547	4.654127198	4.925790769	4.751475139	5.419290886	5.217762005	5.112269478	4.790567693	4.40774186	5.25115216	5.245888728	4.950693561	5.097110931	Fas death domain-associated protein	GO:0010557/GO:0043226/GO:0010604/GO:0006334/GO:0010556/GO:0006325/GO:0010558/GO:0043227/GO:0120025/GO:0010562/GO:0110165/GO:0030295/GO:0006333/GO:0006950/GO:0051093/GO:0050896/GO:1903508/GO:0043170/GO:0006915/GO:0140014/GO:0006996/GO:0012501/GO:0006986/GO:1903506/GO:0032502/GO:0010468/GO:0098687/GO:1903935/GO:0043067/GO:0014902/GO:0014070/GO:0044238/GO:0044085/GO:0051276/GO:0009891/GO:0023052/GO:…	IMP/ISO/IBA/IEA/IDA/IGI/TAS/IPI	BP/CC/MF	PF03344	Daxx	O35613/Q3UKR0	path:mmu05022/path:mmu04210/path:mmu05168/path:mmu04010/path:mmu05012/path:mmu05014	mmu:13163	ko:K02308	Pathways of neurodegeneration - multiple diseases - Mus musculus (house mouse)/Apoptosis - Mus musculus (house mouse)/Herpes simplex virus 1 infection - Mus musculus (house mouse)/MAPK signaling pathway - Mus musculus (house mouse)/Parkinson disease - Mus musculus (house mouse)/Amyotrophic lateral sclerosis - Mus musculus (house mouse)
ENSMUSG00000002308	5.032148247	5.406444098	5.320472822	5.283725199	5.20538342	5.117165729	5.156762753	5.191258412	4.910170514	5.189409496	4.988491347	5.476098123	5.176170961	5.515935269	5.091544853	5.569052695	5.238626452	5.400289497	5.184789039	5.250871182	CD320 antigen	GO:0050670/GO:0042100/GO:0036094/GO:0071702/GO:0042127/GO:0043226/GO:0070665/GO:0032943/GO:0005773/GO:0031226/GO:0043229/GO:0005575/GO:0031224/GO:0050671/GO:0046649/GO:0048018/GO:0051181/GO:0042221/GO:0110165/GO:0030546/GO:0016021/GO:0050789/GO:0046872/GO:0097159/GO:1901363/GO:0031294/GO:0071944/GO:0043169/GO:0002694/GO:0042493/GO:0051179/GO:0031296/GO:0032946/GO:0030890/GO:0005886/GO:0098772/GO:…	ISO/IEA/IMP	BP/MF/CC	PF00057	Cd320	Q9Z1P5		mmu:54219	ko:K06734
ENSMUSG00000002319	6.9082857	7.017877912	6.688965265	7.113477892	7.273977147	7.066047521	7.11408334	7.22506212	6.964860087	7.086526343	6.550845995	6.797397033	7.175393946	6.47157484	7.244758626	7.379162455	6.822541994	6.807697128	7.653411516	6.810763219	importin 4	GO:0033036/GO:0046907/GO:0033365/GO:0009987/GO:0006913/GO:0006810/GO:0072594/GO:0034504/GO:0015031/GO:0051020/GO:0003674/GO:0005048/GO:0006886/GO:0043231/GO:0005488/GO:0051169/GO:0005634/GO:0043229/GO:0033218/GO:0005694/GO:0071702/GO:0031497/GO:0005622/GO:0005215/GO:0110165/GO:0140142/GO:0034724/GO:0008536/GO:0043933/GO:0005737/GO:0034723/GO:0043233/GO:0031974/GO:0034622/GO:0034728/GO:0006335/GO:…	IBA/IEA/ISO/IPI	BP/MF/CC	PF03810/PF02985	Ipo4	Q8VI75	path:mmu03013	mmu:75751	ko:K20221	Nucleocytoplasmic transport - Mus musculus (house mouse)
ENSMUSG00000002320	4.558835487	4.700143695	4.807706154	4.510165228	4.311736179	4.627005304	4.335416122	4.502397576	4.30814018	4.436531675	4.663487685	4.730120012	4.262749403	4.612057721	4.15458984	4.145791252	4.741713095	4.64570451	4.336827802	4.56102574	transmembrane 9 superfamily member 1	GO:0051641/GO:0005764/GO:0034613/GO:0016021/GO:0043227/GO:0061919/GO:0005773/GO:0005622/GO:0043231/GO:0009056/GO:0110165/GO:0031224/GO:0005575/GO:0003674/GO:0031982/GO:0000323/GO:0044248/GO:0072657/GO:0008104/GO:0051179/GO:0016020/GO:0006914/GO:0008152/GO:0008150/GO:0005737/GO:0097708/GO:0031410/GO:0070727/GO:0033036/GO:0043226/GO:0044237/GO:0009987/GO:0043229	IBA/IEA/ND	BP/CC/MF	PF02990	Tm9sf1	Q9DBU0		mmu:74140	ko:K17085
ENSMUSG00000002324	3.755368691	4.351684952	4.016909404	3.746985442	3.911195043	3.915967761	3.758916278	3.990712436	4.082450613	3.60451111	3.672068625	3.485909677	4.324541016	3.519637307	4.339074772	4.300678729	3.794549304	4.171722499	3.980797844	3.502416737	REC8 meiotic recombination protein	GO:0005575/GO:0051321/GO:0098764/GO:0008406/GO:0022403/GO:0051276/GO:0051326/GO:0022402/GO:0051704/GO:0098762/GO:0043232/GO:0045137/GO:0009566/GO:0006807/GO:0070192/GO:0001556/GO:0051716/GO:0008278/GO:0005634/GO:0000819/GO:0005694/GO:0006725/GO:0007275/GO:0044238/GO:0008584/GO:0044237/GO:0070193/GO:0003674/GO:0003006/GO:0048285/GO:0022412/GO:0061982/GO:0032501/GO:0031981/GO:0070013/GO:0005622/GO:…	IBA/IGI/IMP/IPI/IDA/IEA	CC/BP/MF	PF04825/PF04824	Rec8	Q8C5S7	path:mmu04114	mmu:56739	ko:K13054	Oocyte meiosis - Mus musculus (house mouse)
ENSMUSG00000002325	3.962101456	5.045456847	4.600428741	4.818362243	4.240722165	4.491317597	4.688481072	4.680109608	4.087569957	4.151142137	4.481139645	4.702265599	4.269052259	4.992047735	4.660575617	4.246329374	4.915687532	4.679636304	4.297542144	4.759123284	interferon regulatory factor 9	GO:0140110/GO:0031323/GO:1901360/GO:0110165/GO:0003674/GO:0008150/GO:0008152/GO:0034645/GO:0005575/GO:0005515/GO:0001067/GO:1901362/GO:0003700/GO:0005488/GO:0044212/GO:0032774/GO:0001816/GO:0043565/GO:0043231/GO:0009058/GO:0031326/GO:0032501/GO:0034641/GO:0005622/GO:0002376/GO:0001012/GO:0043227/GO:0003690/GO:0097159/GO:0032606/GO:1901363/GO:0000976/GO:0090304/GO:0003677/GO:0043229/GO:0080090/GO:…	IEA/ISO/IPI/IMP/IBA	MF/BP/CC	PF10401/PF00605	Irf9	Q61179/Q3UKQ7/E9Q8M6/E9PZJ2	path:mmu05169/path:mmu05162/path:mmu04625/path:mmu05167/path:mmu04380/path:mmu05171/path:mmu05160/path:mmu04217/path:mmu04621/path:mmu04630/path:mmu05165/path:mmu05168/path:mmu05164/path:mmu05203	mmu:16391	ko:K04693	Epstein-Barr virus infection - Mus musculus (house mouse)/Measles - Mus musculus (house mouse)/C-type lectin receptor signaling pathway - Mus musculus (house mouse)/Kaposi sarcoma-associated herpesvirus infection - Mus musculus (house mouse)/Osteoclast differentiation - Mus musculus (house mouse)/Coronavirus disease - COVID-19 - Mus musculus (house mouse)/Hepatitis C - Mus musculus (house mouse)/…
ENSMUSG00000002326	4.887317105	4.805628751	4.795686543	5.307628255	5.080271929	4.830425827	4.551796136	4.618418629	4.896378487	4.86829986	5.113534332	4.832114539	4.710121615	5.04852487	4.733036245	5.19099588	5.027632642	5.131655929	4.761021515	5.033486482	guanosine monophosphate reductase 2	GO:1901360/GO:1901564/GO:0030224/GO:0019693/GO:0006807/GO:1901575/GO:0005488/GO:1901576/GO:1902560/GO:0003824/GO:1901657/GO:0030154/GO:0030097/GO:0015951/GO:0030099/GO:0015949/GO:0019637/GO:0016491/GO:0016651/GO:0002521/GO:0008152/GO:0008150/GO:0003920/GO:0048513/GO:0018130/GO:0019439/GO:1901362/GO:1901135/GO:1901361/GO:1902494/GO:0046434/GO:0044281/GO:1901565/GO:0005575/GO:1901658/GO:0046130/GO:…	ISO/IBA/IEA	BP/MF/CC	PF00478	Gmpr2	Q99L27	path:mmu01232/path:mmu00230/path:mmu01100	mmu:105446	ko:K00364	Nucleotide metabolism - Mus musculus (house mouse)/Purine metabolism - Mus musculus (house mouse)/Metabolic pathways - Mus musculus (house mouse)
ENSMUSG00000002329	5.478959211	5.480337251	5.382185478	5.548487553	5.600863738	5.213476483	5.5106932	5.508052943	5.539274811	5.48541052	5.609467363	5.267010498	5.41620307	5.27720209	5.394205483	5.460653706	5.275598978	5.645177915	5.57068093	5.430480278	magnesium-dependent phosphatase 1	GO:0016791/GO:0008152/GO:0016787/GO:0016788/GO:0003674/GO:0004725/GO:0042578/GO:0030389/GO:0003824/GO:0046872/GO:0006040/GO:0005488/GO:0043169/GO:0008150/GO:0043167/GO:0004721/GO:0071704/GO:0003993/GO:1901135/GO:0140096	IBA/ISO/IEA	MF/BP	PF12689	Mdp1	Q9D967		mmu:67881	ko:K17619
ENSMUSG00000002332	7.752836225	9.540871886	9.514057559	10.10021631	7.730666909	7.766364793	7.610506891	9.143701776	7.659917392	7.640771664	9.608456868	9.585258452	7.812257539	9.85777394	7.685816345	7.665231164	9.967115474	9.960969158	7.316085412	9.778921312	dehydrogenase/reductase (SDR family) member 1	GO:0031966/GO:0110165/GO:0003824/GO:0005575/GO:0003674/GO:0016020/GO:0043227/GO:0005622/GO:0005773/GO:0005737/GO:0005783/GO:0031090/GO:0071944/GO:0055114/GO:0043226/GO:0005740/GO:0043231/GO:0031967/GO:0005743/GO:0043229/GO:0019866/GO:0012505/GO:0005886/GO:0008150/GO:0031975/GO:0005739/GO:0008152/GO:0016491	HDA/ISO/IEA/ND	CC/MF/BP	PF00106	Dhrs1	Q3TVU9/Q99L04		mmu:52585	ko:K11163
ENSMUSG00000002341	5.174543427	4.651603104	5.205460409	5.264933364	5.144967406	4.938441275	5.29588111	5.133037391	5.083754462	5.21668518	4.780551318	5.146237462	5.070510584	4.742553516	4.864063333	5.305906553	4.788174152	4.959332964	5.159926453	4.951630881	neurocan	GO:0005540/GO:0098966/GO:0005539/GO:0005509/GO:0009987/GO:0050803/GO:0099535/GO:0050807/GO:0030054/GO:0008150/GO:0072534/GO:0062023/GO:0097367/GO:0005488/GO:0003674/GO:0045202/GO:0051823/GO:0016043/GO:0065008/GO:0031406/GO:0050808/GO:0034330/GO:0043177/GO:0031012/GO:0043168/GO:0032501/GO:0051128/GO:0005576/GO:0043167/GO:0032502/GO:0022610/GO:0036094/GO:0043169/GO:0071840/GO:0050794/GO:0110165/GO:…	IEA/ISO/IMP/IBA	MF/CC/BP	PF00008/PF00084/PF00059/PF07686/PF00193	Ncan	A0A0R4IZX5/P55066		mmu:13004	ko:K06794
ENSMUSG00000002342	5.043596631	5.27365895	5.432445964	5.408579176	5.20586809	5.216005745	5.031658032	5.620775619	5.211709949	5.367664479	5.444704398	5.495008952	5.121161713	5.309072313	5.211493651	5.270694732	5.627548091	5.488912559	5.005756448	5.424586013	transmembrane protein 161A	GO:0043170/GO:0009314/GO:2001243/GO:0044260/GO:2001242/GO:0044238/GO:0008152/GO:0009416/GO:0071478/GO:0009893/GO:1902230/GO:0009628/GO:2001233/GO:0009411/GO:0007165/GO:1902531/GO:0005575/GO:0010646/GO:0110165/GO:0008219/GO:0009968/GO:2001234/GO:0008630/GO:0034599/GO:0048519/GO:0008150/GO:0006259/GO:0010033/GO:0010604/GO:1902532/GO:0031323/GO:0050896/GO:0023057/GO:0080090/GO:0019222/GO:0007154/GO:…	ISO/IEA/ND	BP/CC/MF	PF10268	Tmem161a	Q8VCA6		mmu:234371
ENSMUSG00000002343	5.566317954	5.592457192	4.880583151	5.592357444	5.507462717	5.540583635	5.465806254	5.457321528	5.043135388	5.474382205	5.184683941	5.269701161	5.787326666	5.342916661	5.675983683	5.259633681	5.276509849	5.06608789	5.183644862	5.08780651	armadillo repeat containing 6	GO:0005737/GO:0002376/GO:0007275/GO:0048731/GO:0048856/GO:0032502/GO:0009987/GO:0030097/GO:0048869/GO:0030154/GO:0048513/GO:0032501/GO:0008150/GO:0048534/GO:0002520/GO:0003674/GO:0002244/GO:0005829/GO:0110165/GO:0005575/GO:0005622	ISO/IGI/IBA/ND	CC/BP/MF	PF00514	Armc6	Q8BNU0		mmu:76813	ko:K24166
ENSMUSG00000002345	5.247953053	5.320378942	5.199727191	5.393414801	5.790523997	5.300714943	5.326181835	5.526995714	5.161790901	5.170131827	5.10461589	5.453082433	5.471151362	5.508223912	5.443644001	5.280253393	5.187126494	5.168495051	5.896047586	5.594099202	BLOC-1 related complex subunit 8	GO:0043226/GO:0008150/GO:0110165/GO:0099078/GO:0000323/GO:0016020/GO:0005622/GO:0003674/GO:0043227/GO:0005575/GO:0005737/GO:0005773/GO:0005764/GO:0043229/GO:0005829/GO:0032991/GO:0043231	IEA/ND/ISO	CC/BP/MF	PF10167	Borcs8	Q9D6Y4/D3Z373		mmu:72368	ko:K20822
ENSMUSG00000002346	4.328435845	4.067362903	4.051628828	3.836688799	4.042985279	4.331466777	4.122764317	4.183761027	4.37047624	4.113808515	3.910966319	3.948236916	3.892290969	3.73687245	3.75586031	3.812722683	3.959294604	4.051039007	4.347068688	4.330733116	solute carrier family 25 member 42	GO:0005575/GO:0051234/GO:0006810/GO:0015075/GO:0019866/GO:0005215/GO:0098655/GO:0003674/GO:0015101/GO:0022857/GO:0080122/GO:0015216/GO:0072530/GO:0031224/GO:0008150/GO:0110165/GO:0043231/GO:0003824/GO:0098656/GO:0031090/GO:0051184/GO:0009987/GO:0005347/GO:0016020/GO:0080121/GO:0000295/GO:0008514/GO:0006812/GO:0015932/GO:0051181/GO:0015867/GO:0051182/GO:0006811/GO:0015217/GO:0006862/GO:0071106/GO:…	ISO/IEA/HDA	CC/BP/MF	PF00153	Slc25a42	Q8R0Y8		mmu:73095	ko:K15085
ENSMUSG00000002365	4.47312078	4.068505911	4.325673372	4.562367723	4.174884106	4.348857705	3.861290838	4.50553695	4.142947449	4.269689515	4.36615279	4.273179628	3.858326184	4.719605897	4.371598621	4.648328047	4.458001214	4.426362905	4.118371947	4.218961162	sorting nexin 9	GO:0012505/GO:0003674/GO:0051345/GO:0045860/GO:0031323/GO:0051174/GO:0036089/GO:0005488/GO:0031325/GO:0051234/GO:0031090/GO:0005575/GO:0043168/GO:0016020/GO:0030864/GO:0031982/GO:0044089/GO:0006810/GO:0071705/GO:0010638/GO:0031234/GO:0051179/GO:0042325/GO:0034622/GO:0043087/GO:0051171/GO:0034613/GO:0044087/GO:0097478/GO:0031625/GO:0000281/GO:0006886/GO:0043085/GO:0097435/GO:0015833/GO:0045184/GO:…	ISO/IEA/IPI/IDA/IMP	CC/MF/BP	PF10456/PF00018/PF00787	Snx9	Q91VH2/Q3U1P2	path:mmu05132	mmu:66616	ko:K17923	Salmonella infection - Mus musculus (house mouse)
ENSMUSG00000002372	7.039547138	7.098646478	6.827495667	7.058464924	7.028967756	6.842064616	6.826019576	6.898629661	6.938271683	6.968476835	6.764678127	7.037699022	7.020819173	6.938357626	7.061680135	6.930721649	6.798822243	6.876591581	7.031869553	7.039179291	RAN binding protein 3	GO:0031267/GO:0019899/GO:0030234/GO:0008150/GO:0016818/GO:0015031/GO:0031974/GO:0033036/GO:0017111/GO:0046332/GO:0016462/GO:0030695/GO:0005622/GO:0043233/GO:0043227/GO:0043231/GO:0043229/GO:0008536/GO:0005515/GO:0071705/GO:0005575/GO:0031981/GO:0017016/GO:0051020/GO:0012505/GO:0071702/GO:0051641/GO:0051649/GO:0060589/GO:0031975/GO:0042886/GO:0016817/GO:0098772/GO:0110165/GO:0051234/GO:0051169/GO:…	IBA/IEA/ISO	MF/BP/CC	PF00638	Ranbp3	Q9CT10	path:mmu05166	mmu:71810	ko:K15304	Human T-cell leukemia virus 1 infection - Mus musculus (house mouse)
ENSMUSG00000002379	9.230810341	9.603384851	8.979696009	9.198764689	9.578598174	9.192924005	9.382734954	9.209363198	9.141826414	9.392985539	8.88821312	9.123043237	9.62211578	8.940351744	9.635223783	9.594226245	9.005895658	9.173414564	9.420544511	9.009601152	NADH:ubiquinone oxidoreductase subunit A11	GO:0005743/GO:0110165/GO:0034622/GO:0043226/GO:0031966/GO:0005746/GO:0098800/GO:0033108/GO:0005747/GO:0031967/GO:0098798/GO:0030964/GO:0016021/GO:0005740/GO:0043227/GO:0005739/GO:0031975/GO:0016020/GO:0032991/GO:0019866/GO:0098803/GO:0031090/GO:0043231/GO:0043229/GO:0070469/GO:1902494/GO:0007005/GO:0065003/GO:0055114/GO:0016043/GO:0008150/GO:0005737/GO:0032981/GO:0009987/GO:0005622/GO:0005575/GO:…	ISO/IDA/IBA/IEA/HDA/ND	CC/BP/MF		Ndufa11	G5E814	path:mmu05014/path:mmu04714/path:mmu04723/path:mmu05020/path:mmu05016/path:mmu01100/path:mmu05415/path:mmu05208/path:mmu05012/path:mmu05022/path:mmu00190/path:mmu04932/path:mmu05010	mmu:69875	ko:K03956	Amyotrophic lateral sclerosis - Mus musculus (house mouse)/Thermogenesis - Mus musculus (house mouse)/Retrograde endocannabinoid signaling - Mus musculus (house mouse)/Prion disease - Mus musculus (house mouse)/Huntington disease - Mus musculus (house mouse)/Metabolic pathways - Mus musculus (house mouse)/Diabetic cardiomyopathy - Mus musculus (house mouse)/Chemical carcinogenesis - reactive oxyg…
ENSMUSG00000002393	6.155943809	6.364136814	6.042836772	6.4421821	6.597914633	6.307144789	6.385028115	6.611463724	6.0012088	6.146728454	6.104577476	6.322088405	6.297975147	6.155819332	6.454511986	6.688976874	6.427723122	6.175193607	6.598908977	6.233749631	nuclear receptor subfamily 2 group F member 6	GO:0010558/GO:0048519/GO:0090304/GO:0046914/GO:0038023/GO:0010605/GO:0006807/GO:0110165/GO:2000113/GO:0046483/GO:0044212/GO:0050951/GO:0050877/GO:0034645/GO:0006725/GO:0048511/GO:0048468/GO:0050906/GO:0034654/GO:0000977/GO:0010629/GO:0046872/GO:0043565/GO:0009058/GO:0050794/GO:0016070/GO:0097159/GO:0003690/GO:1901360/GO:0080090/GO:0019219/GO:0043170/GO:0010467/GO:0034641/GO:2000112/GO:0050896/GO:…	ISO/IDA/IBA/IEA/IMP/IPI	BP/MF/CC	PF00104/PF00105	Nr2f6	P43136		mmu:13864	ko:K08549
ENSMUSG00000002395	7.829278319	8.306562352	7.625751565	8.301720492	8.279245111	7.788736625	7.812937339	7.961572997	7.663963776	7.726331898	7.850624305	8.048355913	7.960016773	8.204074836	8.147179376	7.828882285	8.049004079	7.934873323	7.877276086	8.00167242	unconventional SNARE in the ER 1 homolog (S. cerevisiae)	GO:0051649/GO:0032386/GO:0031224/GO:0071786/GO:0071705/GO:0009987/GO:0006810/GO:0032879/GO:0016021/GO:0016043/GO:0051179/GO:0110165/GO:0043227/GO:0043229/GO:0005773/GO:0006888/GO:0016192/GO:0043226/GO:0071840/GO:0051049/GO:0006996/GO:0012505/GO:0071944/GO:0005886/GO:0005575/GO:0046907/GO:0008150/GO:0005783/GO:0043231/GO:0071702/GO:0060341/GO:0050794/GO:0005737/GO:0033036/GO:0016020/GO:0048193/GO:…	IMP/IEA/ISO	BP/CC	PF09753	Use1	E9Q496/Q9CQ56	path:mmu04130	mmu:67023	ko:K08507	SNARE interactions in vesicular transport - Mus musculus (house mouse)
ENSMUSG00000002396	3.887708615	4.067076881	3.232426497	3.553766785	3.715422494	3.550453489	3.414619391	3.789720326	3.728695808	3.850099333	4.152041609	3.338129832	3.794184445	4.035000626	3.13145568	3.171817686	3.975776687	3.536212215	3.720402114	3.41052648	occludin/ELL domain containing 1	GO:0008150/GO:0003674/GO:0005575	ND	BP/MF/CC	PF07303	Ocel1	Q8VCR9/D3Z3P2/G5E815		mmu:77090
ENSMUSG00000002409	4.226742037	4.039085724	3.999923923	4.303905895	4.442993948	4.202513226	4.373586246	4.515820576	4.191610727	4.464188428	3.86979005	4.288882782	4.430041174	4.515081433	4.840798676	4.687738452	4.036758833	4.161222483	4.399707586	4.379574296	dual-specificity tyrosine-(Y)-phosphorylation regulated kinase 1b	GO:0006139/GO:0006464/GO:0000166/GO:0034654/GO:0036094/GO:1901362/GO:0034641/GO:0032774/GO:0140110/GO:0007520/GO:0006351/GO:0006468/GO:1901265/GO:0003712/GO:0006725/GO:0043170/GO:0034645/GO:0008152/GO:0006796/GO:0030554/GO:1901360/GO:0140253/GO:0006793/GO:0140096/GO:0032559/GO:0006807/GO:0008150/GO:0019538/GO:0031323/GO:0042692/GO:0003674/GO:0043168/GO:0006355/GO:0008144/GO:0035639/GO:0000768/GO:…	ISO/IEA/IBA/IMP	BP/MF/CC	PF00069	Dyrk1b	Q9Z188		mmu:13549	ko:K08825
ENSMUSG00000002413	4.52096466	3.67339089	4.481307257	4.040831499	3.692668154	4.279229136	4.270242476	4.107633209	4.66249874	4.488910427	4.057686311	4.153083112	4.427749334	3.576514149	3.997338297	3.812901151	4.514718623	4.207325417	3.793768778	3.672110593	Braf transforming gene	GO:0048538/GO:0006807/GO:0005829/GO:0030182/GO:0031032/GO:0006810/GO:0051239/GO:0042995/GO:0045666/GO:0051247/GO:0098693/GO:0043229/GO:0005737/GO:0051240/GO:0030155/GO:0030878/GO:0006950/GO:0043005/GO:0048534/GO:0005739/GO:0051249/GO:0009967/GO:0045664/GO:0043069/GO:0030154/GO:0071840/GO:0010646/GO:0045619/GO:0051234/GO:0048513/GO:0080135/GO:0120035/GO:0005634/GO:0006915/GO:0022607/GO:0051259/GO:…	IGI/IMP/IBA/IDA/ISO/IEA/IPI	BP/CC/MF	PF00130/PF07714/PF02196	Braf	P28028	path:mmu05034/path:mmu05224/path:mmu05214/path:mmu04650/path:mmu05225/path:mmu04150/path:mmu04914/path:mmu04722/path:mmu05211/path:mmu04012/path:mmu05213/path:mmu01522/path:mmu04510/path:mmu05010/path:mmu04726/path:mmu05208/path:mmu05215/path:mmu04910/path:mmu04730/path:mmu04720/path:mmu04810/path:mmu05223/path:mmu04068/path:mmu04024/path:mmu05022/path:mmu05226/path:mmu05210/path:mmu04062/path:mm…	mmu:109880	ko:K04365	Alcoholism - Mus musculus (house mouse)/Breast cancer - Mus musculus (house mouse)/Glioma - Mus musculus (house mouse)/Natural killer cell mediated cytotoxicity - Mus musculus (house mouse)/Hepatocellular carcinoma - Mus musculus (house mouse)/mTOR signaling pathway - Mus musculus (house mouse)/Progesterone-mediated oocyte maturation - Mus musculus (house mouse)/Neurotrophin signaling pathway - M…
ENSMUSG00000002416	9.150214931	9.413605451	8.994449456	9.080470417	9.497552905	9.140133455	9.21311129	9.116949291	9.127750893	9.247231386	9.022968851	9.260790574	9.409776867	9.033416791	9.318207105	8.997499691	8.930224575	9.198438056	9.401063948	9.151690157	NADH:ubiquinone oxidoreductase subunit B2	GO:0031966/GO:0005743/GO:0022607/GO:0005740/GO:0016043/GO:0110165/GO:0005747/GO:0043229/GO:0098796/GO:0019866/GO:0031090/GO:0031975/GO:0006996/GO:0005746/GO:0005575/GO:0030964/GO:0031967/GO:0007005/GO:0043227/GO:1990204/GO:0098803/GO:1902494/GO:0043231/GO:0098798/GO:0005739/GO:0005737/GO:0005622/GO:0032981/GO:0016020/GO:0008150/GO:0045271/GO:0003674/GO:0008152/GO:0043933/GO:0009987/GO:0032991/GO:…	ISO/IEA/IBA/HDA/ND	CC/BP/MF	PF14813	Ndufb2	Q9CPU2	path:mmu05012/path:mmu05415/path:mmu05010/path:mmu05020/path:mmu04932/path:mmu05208/path:mmu01100/path:mmu05014/path:mmu00190/path:mmu04714/path:mmu04723/path:mmu05022/path:mmu05016	mmu:68198	ko:K03958	Parkinson disease - Mus musculus (house mouse)/Diabetic cardiomyopathy - Mus musculus (house mouse)/Alzheimer disease - Mus musculus (house mouse)/Prion disease - Mus musculus (house mouse)/Non-alcoholic fatty liver disease - Mus musculus (house mouse)/Chemical carcinogenesis - reactive oxygen species - Mus musculus (house mouse)/Metabolic pathways - Mus musculus (house mouse)/Amyotrophic lateral…
ENSMUSG00000002428	4.22407038	4.185848613	4.28019017	4.575410947	3.982051487	3.884045675	4.105408037	4.33016237	4.221709224	4.29469288	4.224916036	4.11259701	4.050438378	4.596535555	4.182488675	4.109773999	4.287181648	4.411676503	4.243891811	4.516650973	helicase-like transcription factor	GO:0048518/GO:0003700/GO:0043167/GO:0046914/GO:0003690/GO:0048522/GO:0003824/GO:0005622/GO:0016462/GO:0051171/GO:0005634/GO:0031625/GO:0035639/GO:0010628/GO:2000112/GO:1902680/GO:0016070/GO:0031981/GO:0003677/GO:0016043/GO:1901363/GO:0005575/GO:1901564/GO:1990837/GO:0036211/GO:0065007/GO:1903508/GO:0036094/GO:0045944/GO:0046872/GO:0009059/GO:0010467/GO:0031328/GO:0045935/GO:0032446/GO:0031974/GO:…	IDA/IEA/ISO	BP/MF/CC	PF08797/PF00176/PF00271	Hltf	Q6PCN7		mmu:20585	ko:K15711
ENSMUSG00000002455	6.558986205	6.720618622	6.449970962	6.498321139	6.674358939	6.39847928	6.506542161	6.667603839	6.312232143	6.51891819	6.396753076	6.622982574	6.479282878	6.494538732	6.28740174	6.762400506	6.338016731	6.392532682	6.666711681	6.693220805	pre-mRNA splicing factor 6	GO:0071826/GO:0097525/GO:0045935/GO:0010628/GO:0016070/GO:0071840/GO:0000398/GO:0090304/GO:0016043/GO:0080090/GO:0016071/GO:0034641/GO:0034622/GO:0034654/GO:1901576/GO:0016607/GO:0044877/GO:0045944/GO:0044249/GO:0032774/GO:0032991/GO:1903506/GO:0071704/GO:0000974/GO:0050789/GO:0097526/GO:0006357/GO:0046483/GO:0071013/GO:1902680/GO:1990904/GO:0010604/GO:0005685/GO:0043170/GO:0046540/GO:0097159/GO:…	ISO/IBA/IEA	BP/CC/MF	PF06424	Prpf6	Q91YR7	path:mmu03040	mmu:68879	ko:K12855	Spliceosome - Mus musculus (house mouse)
ENSMUSG00000002458	4.714010191	4.75822301	5.122812081	5.281460553	4.748340302	5.125058853	4.915173444	5.164870042	4.565540942	4.834284596	5.17038444	5.280914665	5.171352068	5.409164653	5.156333075	4.504338356	4.823781161	5.277346784	4.822425606	5.157230436	regulator of G-protein signaling 19	GO:0098805/GO:0048523/GO:0045121/GO:0007154/GO:0005884/GO:0009966/GO:0005515/GO:0071944/GO:0065007/GO:0005488/GO:0005856/GO:0005575/GO:0005902/GO:0098862/GO:0008150/GO:0030135/GO:0007165/GO:0030136/GO:0043232/GO:0043226/GO:0051716/GO:0120025/GO:0003674/GO:0048519/GO:0023057/GO:0005622/GO:0010648/GO:0023051/GO:0001965/GO:0099081/GO:0098590/GO:0048583/GO:0005737/GO:0050789/GO:0043229/GO:0016020/GO:…	ISO/IEA/IPI	CC/BP/MF	PF00615	Rgs19	Q8BFU4/Q78NN4/Q9CX84/B7ZCT1		mmu:56470	ko:K16449
ENSMUSG00000002459	3.279575197	3.933422365	3.818886327	3.632481079	3.551316726	3.751604043	3.259175087	3.489794945	3.695269191	3.781318369	4.219717948	3.664231799	3.580756874	3.954550565	3.293575688	3.443024208	4.197162563	4.033724144	3.359812639	4.005850886	regulator of G-protein signaling 20	GO:0110165/GO:0051716/GO:0050789/GO:0050896/GO:0098791/GO:0065007/GO:0050794/GO:0043229/GO:0005622/GO:0098772/GO:0071944/GO:0043226/GO:0017111/GO:0005773/GO:0005096/GO:0016462/GO:0005794/GO:0012505/GO:0016818/GO:0010648/GO:0060589/GO:0005634/GO:0030234/GO:0003924/GO:0043227/GO:0023052/GO:0023051/GO:0009987/GO:0016020/GO:0005802/GO:0030695/GO:0048583/GO:0023057/GO:0009966/GO:0007165/GO:0007154/GO:…	TAS/IEA/ISO	CC/BP/MF	PF00615	Rgs20	Q8C5J7/E9Q720/Q9QZB1		mmu:58175	ko:K16449
ENSMUSG00000002475	5.387869543	5.270544303	5.846491176	5.635249291	5.207972151	5.494622678	5.625777862	5.820665399	6.022975741	5.742774803	5.815039327	5.380365863	5.626149444	5.833656774	5.786572478	5.529797536	5.602916028	5.769985032	4.991524927	5.341491954	abhydrolase domain containing 3	GO:0006629/GO:0016042/GO:0016298/GO:0016788/GO:0044281/GO:0004620/GO:0008150/GO:0016787/GO:0044249/GO:0071704/GO:0044282/GO:0004623/GO:1901575/GO:1901564/GO:0003674/GO:0006807/GO:0006796/GO:0006631/GO:0005575/GO:0044237/GO:0043436/GO:0009058/GO:0008970/GO:0006644/GO:0016053/GO:0009987/GO:0019637/GO:0046394/GO:0044238/GO:0006082/GO:0046486/GO:0044283/GO:0046395/GO:0044255/GO:0009056/GO:0006650/GO:…	IBA/ISO/IEA/IMP/ND	BP/MF/CC	PF12697	Abhd3	Q91ZH7		mmu:106861	ko:K13696
ENSMUSG00000002477	7.068494679	7.391412786	6.933715724	6.973108604	7.208308372	6.94077528	7.127340973	6.791514072	7.014033383	7.241212124	6.992208555	6.910569358	7.357383589	6.98824977	7.031473424	6.751306815	6.963312602	7.153504618	7.413289554	6.898510198	small nuclear ribonucleoprotein D1	GO:0043229/GO:0034715/GO:0006725/GO:0044085/GO:0097159/GO:0043231/GO:0043226/GO:0005689/GO:0110165/GO:0044237/GO:0043227/GO:0005685/GO:0043021/GO:0097526/GO:0016043/GO:0000377/GO:0034719/GO:0000387/GO:0009987/GO:0000375/GO:0005688/GO:0090304/GO:0043933/GO:0097525/GO:0016070/GO:0010467/GO:0034641/GO:1901360/GO:0008380/GO:0071840/GO:0005686/GO:0000398/GO:1902494/GO:0071826/GO:0005634/GO:1990904/GO:…	IBA/ISO/IEA/IDA	CC/BP/MF	PF01423	Snrpd1	P62315	path:mmu05322/path:mmu03040	mmu:20641	ko:K11087	Systemic lupus erythematosus - Mus musculus (house mouse)/Spliceosome - Mus musculus (house mouse)
ENSMUSG00000002486	3.719740669	3.983941031	3.65356807	3.399462411	3.33762759	3.625857434	3.295736488	3.521976601	3.402693765	3.821961014	3.319354048	3.822039427	3.669022621	3.462982744	3.449940624	3.862558773	3.584726487	3.530135629	3.575607795	3.512811538	trichoplein keratin filament binding	GO:0099568/GO:0099512/GO:0061512/GO:0031345/GO:0051650/GO:0043228/GO:0065007/GO:0005929/GO:0051656/GO:0098840/GO:0071840/GO:0010639/GO:0070727/GO:0006996/GO:0006810/GO:0006886/GO:0030030/GO:0071944/GO:0099513/GO:0051234/GO:0051649/GO:1905349/GO:0009987/GO:0043232/GO:0045926/GO:0031344/GO:0005882/GO:0005938/GO:0005886/GO:0005737/GO:0043229/GO:0051641/GO:0070925/GO:0045095/GO:0001578/GO:0007018/GO:…	ISO/IEA/IDA/IBA/ND	CC/BP/MF		Tchp	Q3TVW5		mmu:77832	ko:K16811
ENSMUSG00000002489	3.615618164	3.638585651	3.480180198	3.11367766	3.399507662	3.507920187	3.320214908	3.477227676	3.446197518	3.571745924	3.298727894	3.196323755	3.497628533	3.006135419	3.772895875	3.418784092	3.319924877	3.056446493	3.91770866	3.330111203	T cell lymphoma invasion and metastasis 1	GO:0048731/GO:0003008/GO:0061564/GO:0051046/GO:0032502/GO:0007154/GO:0010562/GO:0043232/GO:0048667/GO:0032501/GO:0048666/GO:0010604/GO:0000902/GO:0099512/GO:0005737/GO:0046883/GO:0015629/GO:0002791/GO:0000904/GO:0048762/GO:0010033/GO:0099513/GO:0050790/GO:0016020/GO:0017016/GO:0051099/GO:1904338/GO:0015630/GO:0051098/GO:0023052/GO:0019898/GO:0099080/GO:0015031/GO:0031256/GO:0042330/GO:0022604/GO:…	ISO/IC/IMP/IGI/IDA/IEA/IPI	BP/CC/MF	PF02196/PF00595/PF00621/PF00169/PF18385	Tiam1	Q6P1D6/G3UWG2/Q3UHH6/Q3UVX2/E9Q1R7	path:mmu04810/path:mmu04014/path:mmu04062/path:mmu04015/path:mmu04024/path:mmu05205/path:mmu04530	mmu:21844	ko:K05731	Regulation of actin cytoskeleton - Mus musculus (house mouse)/Ras signaling pathway - Mus musculus (house mouse)/Chemokine signaling pathway - Mus musculus (house mouse)/Rap1 signaling pathway - Mus musculus (house mouse)/cAMP signaling pathway - Mus musculus (house mouse)/Proteoglycans in cancer - Mus musculus (house mouse)/Tight junction - Mus musculus (house mouse)
ENSMUSG00000002496	6.776305664	6.6411066	6.39631935	6.779448159	6.777485986	6.756588321	6.64851513	6.630593934	6.669956741	6.705004523	6.422209004	6.509109101	6.645374264	6.417417756	6.260542845	6.62625319	6.390394935	6.645869399	7.041023963	6.471726518	TSC complex subunit 2	GO:1901700/GO:0051716/GO:0005856/GO:0023051/GO:0035556/GO:0048548/GO:0051703/GO:1901699/GO:0009894/GO:0009893/GO:0051129/GO:0005829/GO:0009987/GO:0048583/GO:0023057/GO:0008150/GO:0044853/GO:0098589/GO:0051898/GO:1901698/GO:0048468/GO:0030010/GO:0016236/GO:1901701/GO:0048471/GO:0048523/GO:0098590/GO:0051128/GO:0001843/GO:0048513/GO:0008286/GO:0007154/GO:0009968/GO:0051674/GO:1902532/GO:0048550/GO:…	IBA/IEA/ISO/IMP/IGI/IDA/IPI/EXP	BP/CC/MF	PF02145/PF11864/PF03542	Tsc2	Q7TT21/Q3TQ10/Q3UGI8/Q3UHB2/Q3UG88	path:mmu05168/path:mmu04714/path:mmu04072/path:mmu05165/path:mmu04150/path:mmu05163/path:mmu05231/path:mmu04152/path:mmu04140/path:mmu04218/path:mmu04919/path:mmu04151/path:mmu04115/path:mmu04211/path:mmu04910	mmu:22084	ko:K07207	Herpes simplex virus 1 infection - Mus musculus (house mouse)/Thermogenesis - Mus musculus (house mouse)/Phospholipase D signaling pathway - Mus musculus (house mouse)/Human papillomavirus infection - Mus musculus (house mouse)/mTOR signaling pathway - Mus musculus (house mouse)/Human cytomegalovirus infection - Mus musculus (house mouse)/Choline metabolism in cancer - Mus musculus (house mouse)/…
ENSMUSG00000002504	6.924899786	6.971577045	6.815743914	6.881073926	7.502530366	6.676768775	7.238258532	6.90587931	6.863630012	7.092147718	6.679541559	7.106664426	6.916094032	7.23067926	7.297154379	7.326049697	6.783530326	6.923444372	7.419331288	7.029548335	solute carrier family 9 (sodium/hydrogen exchanger) member 3 regulator 2	GO:0043229/GO:0098590/GO:0009987/GO:0050794/GO:0098862/GO:0043227/GO:0005575/GO:0098858/GO:0005856/GO:0005634/GO:0051234/GO:0005515/GO:0008150/GO:0016324/GO:0043228/GO:0099080/GO:0051716/GO:0050789/GO:0005622/GO:0009968/GO:0051050/GO:0016020/GO:0043231/GO:0005737/GO:0060090/GO:0008022/GO:0009966/GO:0065007/GO:0005884/GO:0014067/GO:0050877/GO:0055085/GO:0048518/GO:0007600/GO:0048583/GO:0050750/GO:…	IDA/ISO/IGI/IPI/IMP/IEA	CC/BP/MF	PF00595/PF09007	Slc9a3r2	Q9JHL1/A0A0R4IZX2/A0A0R4J006	path:mmu04960	mmu:65962	ko:K13358	Aldosterone-regulated sodium reabsorption - Mus musculus (house mouse)
ENSMUSG00000002524	8.041809347	8.189476717	8.036971647	8.00277338	8.464869992	8.019972846	8.474093402	8.176080284	8.123812438	8.100055249	7.947728326	8.196764833	8.178004848	7.915291132	8.587869821	8.45152511	8.093952684	8.142236249	8.284824235	8.050034862	poly-U binding splicing factor 60	GO:0010467/GO:0030054/GO:0043226/GO:0016070/GO:0005488/GO:0043229/GO:0003674/GO:0005575/GO:0043233/GO:0009987/GO:0005634/GO:0043227/GO:0012501/GO:0003676/GO:0043231/GO:0005654/GO:0003723/GO:0031974/GO:0042802/GO:0097159/GO:0006396/GO:0006725/GO:0005622/GO:0031981/GO:0008152/GO:0006139/GO:0016071/GO:0003677/GO:0008150/GO:1901363/GO:0043170/GO:0034641/GO:0006397/GO:0110165/GO:0005515/GO:0090304/GO:…	IEA/ISO	BP/CC/MF	PF00076	Puf60	Q3UEB3	path:mmu03040	mmu:67959	ko:K12838	Spliceosome - Mus musculus (house mouse)
ENSMUSG00000002546	6.553890268	6.564949478	6.308638192	6.49248213	6.681161035	6.606150446	6.503930422	6.537076509	6.434934081	6.538728703	6.650635266	6.59538321	6.770318651	6.457414719	6.357127528	6.485308101	6.440269956	6.351752411	6.737603637	6.554663744	golgi autoantigen golgin subfamily a 2	GO:0031985/GO:0048858/GO:0030134/GO:0022414/GO:0030154/GO:0048812/GO:0030135/GO:0007010/GO:0051225/GO:0051234/GO:0009893/GO:0005575/GO:0005488/GO:0009056/GO:0051179/GO:0005886/GO:0009892/GO:0051130/GO:0048523/GO:0030182/GO:0006486/GO:0006996/GO:0032501/GO:0032502/GO:0048519/GO:0048731/GO:0032580/GO:0031982/GO:0007020/GO:0007017/GO:0051289/GO:0031326/GO:0042886/GO:0065007/GO:0005515/GO:0008356/GO:…	IBA/IMP/ISO/IEA/IDA/IPI	CC/BP/MF	PF15070	Golga2	Q5DTL1/Q921M4/E9PUQ5		mmu:99412	ko:K20358
ENSMUSG00000002550	5.400690368	5.398434146	5.186892943	5.536051676	5.598423642	5.093596177	5.229198013	5.451265033	5.315562632	5.589667401	5.23524466	5.508520967	5.109423482	5.455222646	5.298092731	4.857650669	5.79432294	5.502874534	5.079704103	5.286135988	uridine-cytidine kinase 1	GO:0016740/GO:0097159/GO:0035639/GO:0005829/GO:0005737/GO:0016301/GO:0016772/GO:0019205/GO:0036094/GO:0003824/GO:0008144/GO:0097367/GO:0110165/GO:0032555/GO:1901265/GO:0032553/GO:0004849/GO:0030554/GO:0005575/GO:0003674/GO:0005524/GO:0032559/GO:0000166/GO:0005488/GO:0019206/GO:0017076/GO:0005622/GO:0043168/GO:1901363/GO:0043167	IBA/IEA	MF/CC	PF00485	Uck1	P52623/A2AN37/Q3V218	path:mmu01232/path:mmu00240/path:mmu00983/path:mmu01100	mmu:22245	ko:K00876	Nucleotide metabolism - Mus musculus (house mouse)/Pyrimidine metabolism - Mus musculus (house mouse)/Drug metabolism - other enzymes - Mus musculus (house mouse)/Metabolic pathways - Mus musculus (house mouse)
ENSMUSG00000002578	3.425134329	2.789532369	3.446140665	3.024014926	2.81716276	2.958290978	3.339901136	3.156538496	2.832328849	2.927326758	3.416268083	2.86066983	3.006273697	2.805239803	2.814405622	2.959548976	2.728157478	3.033708514	3.65107023	2.873188177	IKAROS family zinc finger 4	GO:0097159/GO:0019222/GO:2000112/GO:0060255/GO:0065007/GO:0005634/GO:0003674/GO:0046483/GO:0045893/GO:0045892/GO:0031328/GO:0003677/GO:0045935/GO:0043170/GO:0065003/GO:0008150/GO:0034645/GO:0097659/GO:0005488/GO:0051259/GO:0005515/GO:2001141/GO:0008134/GO:0042803/GO:0044260/GO:1903508/GO:0043227/GO:0043229/GO:0044271/GO:0009987/GO:0003700/GO:0003676/GO:0051171/GO:0034654/GO:2000113/GO:0031981/GO:…	IEA/IPI/IMP/IBA/IDA/ISO	MF/BP/CC	PF00096	Ikzf4	Q8C208		mmu:22781	ko:K09220
ENSMUSG00000002580	8.005661822	8.793015718	7.856252966	7.991047755	8.395720822	7.889454323	8.445790272	7.900520896	7.799566654	7.896283315	7.849107265	8.080916522	8.633429824	8.125472777	8.687501639	8.515548782	7.916279752	8.143620845	8.533018463	8.011108916	migration and invasion enhancer 1	GO:0005737/GO:0048523/GO:0044089/GO:0048522/GO:0043067/GO:0048518/GO:0043069/GO:0030030/GO:0009987/GO:0046847/GO:0044085/GO:0044087/GO:0050794/GO:0005829/GO:0005886/GO:0016477/GO:0030335/GO:0031226/GO:0043066/GO:0048870/GO:0030031/GO:0012501/GO:0048519/GO:0042981/GO:0051130/GO:0008150/GO:0060491/GO:0050789/GO:0060548/GO:0110165/GO:0005575/GO:0031224/GO:0010941/GO:2000147/GO:0009898/GO:0006915/GO:…	ISO/IBA/IDA/IEA/IPI	CC/BP/MF	PF10262	Mien1	Q9CQ86		mmu:103742	ko:K07401
ENSMUSG00000002602	6.215854373	7.392528322	7.027561282	7.721448576	6.009581268	6.365315697	6.390177512	7.025778582	6.149426323	6.32057812	7.287726437	7.224409612	6.179803525	7.634425091	6.286727725	6.363716153	7.72135757	7.503169253	5.992574636	7.232387242	AXL receptor tyrosine kinase	GO:0043523/GO:0050896/GO:0006955/GO:0016773/GO:2000669/GO:0048869/GO:0043167/GO:0022008/GO:0051234/GO:0006979/GO:0007165/GO:0043412/GO:0040011/GO:0007154/GO:0033993/GO:0032501/GO:0034101/GO:0048699/GO:0032502/GO:0005515/GO:0043524/GO:0000003/GO:0006952/GO:0043491/GO:0071944/GO:2000668/GO:0048518/GO:0043069/GO:0012501/GO:0006954/GO:0051049/GO:0006996/GO:0010324/GO:0031224/GO:0017076/GO:0046718/GO:…	IGI/IMP/IEA/IBA/ISO/IPI/IDA	BP/MF/CC	PF07714/PF00041/PF13895	Axl	Q6PE80/Q8CCF8/Q00993	path:mmu01521	mmu:26362	ko:K05115	EGFR tyrosine kinase inhibitor resistance - Mus musculus (house mouse)
ENSMUSG00000002603	4.62273071	5.82602384	5.89640426	6.430413329	4.794336998	4.655736456	5.048255743	5.679634689	4.719647489	4.625983056	6.168967425	5.96819323	4.859779035	6.363872509	5.073088657	4.384216212	6.448861473	6.181282353	5.503725269	6.124929878	transforming growth factor beta 1	GO:0042127/GO:0031399/GO:0002822/GO:0006875/GO:0009889/GO:0043269/GO:0097028/GO:0050777/GO:0050678/GO:0031401/GO:0001667/GO:0031334/GO:0006874/GO:0048880/GO:0071495/GO:0006351/GO:1901564/GO:0070918/GO:0060389/GO:1901362/GO:0043367/GO:0002821/GO:0030217/GO:1901566/GO:0031982/GO:0019219/GO:0006954/GO:0050672/GO:0002292/GO:0050708/GO:0070887/GO:0065007/GO:0048878/GO:0002791/GO:0002376/GO:0006886/GO:…	ISO/IDA/IBA/IMP/IGI/TAS/IEP/IEA/IPI	BP/CC/MF	PF00019/PF00688	Tgfb1	P04202/Q3UNK5	path:mmu04926/path:mmu05200/path:mmu04350/path:mmu05321/path:mmu05152/path:mmu04390/path:mmu04110/path:mmu05142/path:mmu04933/path:mmu05225/path:mmu05220/path:mmu05415/path:mmu05166/path:mmu05146/path:mmu05205/path:mmu05161/path:mmu05144/path:mmu05323/path:mmu05410/path:mmu04068/path:mmu05211/path:mmu05145/path:mmu04380/path:mmu05210/path:mmu04010/path:mmu04659/path:mmu04672/path:mmu04218/path:mm…	mmu:21803	ko:K13375	Relaxin signaling pathway - Mus musculus (house mouse)/Pathways in cancer - Mus musculus (house mouse)/TGF-beta signaling pathway - Mus musculus (house mouse)/Inflammatory bowel disease - Mus musculus (house mouse)/Tuberculosis - Mus musculus (house mouse)/Hippo signaling pathway - Mus musculus (house mouse)/Cell cycle - Mus musculus (house mouse)/Chagas disease - Mus musculus (house mouse)/AGE-R…
ENSMUSG00000002608	6.026314756	6.083488049	6.070770701	6.145921557	6.031941135	5.837828991	6.141021674	6.286597148	5.99939912	5.902311181	5.937669151	6.133847267	6.090008724	6.063779192	6.129500085	6.418912713	6.053381634	6.081282289	6.532337531	6.095864891	coiled-coil domain containing 97	GO:0008150/GO:0003674	ND	BP/MF	PF09747	Ccdc97	Q9DBT3		mmu:52132
ENSMUSG00000002617	0.034429363	0.012394765	-0.082784778	-0.066651096	-0.087754064	-0.067432812	0.076374927	-0.079666718	0.147214475	-0.02694612	0.001201403	-0.025939599	-0.023755708	0.037799917	-0.07462142	-0.066540066	0.084585181	-0.028141473	-0.106655351	0.13474618	zinc finger protein 40	GO:0005622/GO:0043227/GO:0043229/GO:0043231/GO:0097159/GO:0110165/GO:0003674/GO:0005634/GO:0005488/GO:0003677/GO:1901363/GO:0043226/GO:0005575/GO:0003676	IBA	CC/MF	PF00096/PF01352	Zfp40	B1B1D3
ENSMUSG00000002625	5.516126034	5.003078167	5.45703059	5.706303889	5.469543694	5.491803553	5.350776322	5.485803962	5.342397753	5.230427889	5.358175686	5.367515713	5.264638053	5.364832972	5.241736525	5.917702298	5.682777839	5.343338432	5.639945389	5.351177532	A kinase (PRKA) anchor protein 8-like	GO:0005654/GO:0090312/GO:0043226/GO:0042886/GO:0005622/GO:0051223/GO:0019899/GO:0006998/GO:0016070/GO:0042826/GO:0043227/GO:0080090/GO:0042325/GO:0071166/GO:0019438/GO:0046825/GO:0005575/GO:0016310/GO:0019222/GO:0022411/GO:0071427/GO:0043170/GO:0045944/GO:0090304/GO:0005488/GO:0051234/GO:0016071/GO:0070013/GO:0015031/GO:0030397/GO:0010628/GO:0090087/GO:0046831/GO:0005634/GO:0006996/GO:0060341/GO:…	ISO/IDA/IBA/IEA	CC/BP/MF	PF04988	Akap8l	Q9D0K8/Q5RL57
ENSMUSG00000002633	2.990326942	2.43675982	2.72281136	2.665137138	2.630201083	2.50985703	2.920454647	2.809444055	2.970451418	2.593025477	2.58383266	2.721429597	2.739065183	2.720821645	2.509718845	3.056147436	2.529961569	2.827428891	2.780933019	2.910329511	sonic hedgehog	GO:0045935/GO:0065007/GO:0006351/GO:0018130/GO:0009057/GO:0046634/GO:0007224/GO:0010605/GO:0072193/GO:0035108/GO:0034613/GO:0045944/GO:0051152/GO:0051146/GO:0045995/GO:2000112/GO:0032504/GO:0072175/GO:0051641/GO:0030901/GO:0072191/GO:0051145/GO:0048869/GO:0023052/GO:0009056/GO:0007275/GO:0016202/GO:0072189/GO:0009653/GO:0007435/GO:0048880/GO:0042060/GO:0060425/GO:0048667/GO:0030850/GO:0042063/GO:…	ISO/IMP/IDA/IGI/IBA/TAS/IEA/IPI	BP/CC/MF	PF01079/PF01085	Shh	Q62226	path:mmu05217/path:mmu04340/path:mmu05226/path:mmu04360/path:mmu05205/path:mmu05200	mmu:20423	ko:K11988	Basal cell carcinoma - Mus musculus (house mouse)/Hedgehog signaling pathway - Mus musculus (house mouse)/Gastric cancer - Mus musculus (house mouse)/Axon guidance - Mus musculus (house mouse)/Proteoglycans in cancer - Mus musculus (house mouse)/Pathways in cancer - Mus musculus (house mouse)
ENSMUSG00000002635	4.59711661	5.24253495	4.70729882	4.740155552	4.59167865	4.733821876	4.749064564	4.880393997	4.822435599	4.757085695	4.843527989	4.670558953	5.028012541	4.650521896	5.019791877	4.798110989	4.868332438	4.823751922	4.27211658	4.871191213	programmed cell death 2-like	GO:0008150/GO:0009987/GO:0003674/GO:0005575/GO:0005622/GO:0005737/GO:0110165/GO:0007049	IEA/ND	BP/MF/CC	PF04194	Pdcd2l	Q8C5N5		mmu:68079	ko:K14801
ENSMUSG00000002658	7.066604532	6.969573739	6.689875367	6.776801475	6.679953926	6.979918945	6.910554121	6.906077267	7.007631089	6.827212072	6.846181185	6.909210422	6.867123537	6.663594872	7.013527978	7.526265991	6.798436693	6.517695943	7.129970372	6.782118593	general transcription factor IIF polypeptide 1	GO:0010468/GO:0005515/GO:0051173/GO:0009889/GO:0000428/GO:0010467/GO:0009987/GO:0051252/GO:0060255/GO:0009891/GO:0019219/GO:0048518/GO:0009059/GO:1902680/GO:0005488/GO:0003674/GO:1990841/GO:0003682/GO:0018130/GO:0031974/GO:1903506/GO:0031326/GO:0009893/GO:0043226/GO:0046483/GO:0050789/GO:0019211/GO:0016787/GO:0009058/GO:0010556/GO:0044798/GO:0016791/GO:0010604/GO:0034654/GO:0016070/GO:0065007/GO:…	IDA/IPI/IEA/ISO	BP/MF/CC	PF05793	Gtf2f1	Q3THK3	path:mmu03022	mmu:98053	ko:K03138	Basal transcription factors - Mus musculus (house mouse)
ENSMUSG00000002660	7.229941366	7.569497898	7.194210659	7.502889481	7.436280718	7.115968238	7.100035268	7.269921195	7.061514745	7.134413471	7.29601125	7.337242764	7.358198361	7.395308169	7.526237002	7.515105401	7.261679593	7.439354837	7.309026747	7.521958754	caseinolytic mitochondrial matrix peptidase proteolytic subunit	GO:0044257/GO:0003824/GO:0070011/GO:0008150/GO:1901575/GO:0044267/GO:0005575/GO:0044265/GO:0043226/GO:0004176/GO:0065003/GO:0044260/GO:0005488/GO:0051259/GO:0051260/GO:0051603/GO:0043170/GO:0005515/GO:0044085/GO:0008233/GO:0004175/GO:0003674/GO:0032991/GO:0004252/GO:0009987/GO:0044238/GO:0016787/GO:0016043/GO:0030163/GO:0051117/GO:0006807/GO:0044248/GO:0008152/GO:0031974/GO:0043231/GO:0042802/GO:…	ISO/IEA/ISA/IBA/HDA/IPI/IDA	BP/MF/CC	PF00574	Clpp	O88696		mmu:53895	ko:K01358
ENSMUSG00000002661	6.273552655	6.650020512	6.248264303	6.222084056	6.806852484	6.648571614	6.497332368	6.44122431	6.396557965	6.361318064	6.133325072	6.485543222	6.892289981	6.697909045	6.6257493	6.743067733	6.294463123	6.1824031	6.527618266	6.197935785	alkB homolog 7	GO:0061024/GO:0031974/GO:0005622/GO:0006974/GO:0005737/GO:0006810/GO:0005739/GO:0005575/GO:0012501/GO:0055114/GO:0016491/GO:0043169/GO:0043226/GO:0043231/GO:0008219/GO:0070013/GO:0009987/GO:0010883/GO:0071704/GO:0006839/GO:0007005/GO:0005759/GO:0008150/GO:0019915/GO:0046902/GO:0051716/GO:0010876/GO:0043227/GO:0071840/GO:0065007/GO:1905952/GO:0005488/GO:0016043/GO:0043436/GO:0065008/GO:0051179/GO:…	ISO/IDA/HDA/IEA/IMP	BP/CC/MF	PF13532	Alkbh7	Q9D6Z0		mmu:66400	ko:K10769
ENSMUSG00000002668	1.021285477	0.961154021	0.944695998	1.335502067	0.926544966	1.079877747	1.052560543	1.113838885	0.810389323	1.190922344	1.148619095	1.038808484	0.956580179	1.16171315	0.935116409	0.945569282	1.168776817	1.25794052	1.058874631	0.867408317	DENN/MADD domain containing 1C	GO:0019899/GO:0051020/GO:0051179/GO:0051641/GO:0005543/GO:0005085/GO:0009987/GO:0061024/GO:0005515/GO:0016043/GO:0051234/GO:0010324/GO:0008289/GO:0017016/GO:0003674/GO:0017137/GO:0031982/GO:0035091/GO:0043229/GO:0051649/GO:0046907/GO:0016197/GO:0098772/GO:0043227/GO:0097708/GO:0043231/GO:0017112/GO:0032456/GO:0005488/GO:0005088/GO:1901981/GO:0110165/GO:0043168/GO:0016050/GO:0043226/GO:0006900/GO:…	IBA/ISO/IEA	MF/BP/CC	PF03456/PF02141/PF03455	Dennd1c	Q8CFK6		mmu:70785	ko:K20160
ENSMUSG00000002679	0.927610853	0.896894325	1.406773463	0.917160113	1.276569871	0.924051242	1.4516325	0.892198428	1.388815091	1.293748043	1.386923004	1.062494758	0.886496241	0.870839032	0.958743814	0.96962245	1.105538136	0.881224505	0.993345814	0.9799841	mediator complex subunit 6	GO:0140110/GO:0097659/GO:1901363/GO:0008150/GO:1902494/GO:0006725/GO:0110165/GO:0098727/GO:0031974/GO:0003674/GO:0031981/GO:0006807/GO:0043229/GO:0140096/GO:0004842/GO:0003713/GO:0045893/GO:0046483/GO:1903508/GO:0043227/GO:0048518/GO:0048522/GO:0045935/GO:0003712/GO:1903506/GO:0005654/GO:0003824/GO:0031326/GO:0005488/GO:0045944/GO:0044798/GO:0031328/GO:0034654/GO:0010468/GO:0051173/GO:0034641/GO:…	IEA/ISO/IDA/IMP/IBA/IPI	MF/BP/CC	PF04934	Med6	Q921D4/A0A0R4IZX3/E0CYA6		mmu:69792	ko:K15128
ENSMUSG00000002688	3.274328189	3.156531645	3.294070322	3.280499049	3.039137448	2.9309424	3.011644955	2.949296536	3.118175034	2.936752415	2.89966829	3.363556353	3.236504048	3.370079541	3.033940522	3.268926219	3.113723164	3.047582841	2.928561076	3.236823466	protein kinase D1	GO:0042330/GO:0098791/GO:0051049/GO:0042325/GO:0016773/GO:0010556/GO:0001649/GO:0006812/GO:0006810/GO:0010557/GO:0070848/GO:0016772/GO:0051208/GO:0098771/GO:0006954/GO:0019220/GO:0051179/GO:0006816/GO:0042307/GO:0005829/GO:0140096/GO:0050673/GO:0043123/GO:0042327/GO:0005802/GO:0006952/GO:0048583/GO:0098732/GO:0051173/GO:0001667/GO:0048584/GO:0017076/GO:0070588/GO:0001568/GO:0045766/GO:0010646/GO:…	ISO/IDA/IMP/IEA/IBA/IPI	BP/CC/MF	PF00130/PF00169/PF00069	Prkd1	Q62101	path:mmu04015/path:mmu05208/path:mmu04925	mmu:18760	ko:K06070	Rap1 signaling pathway - Mus musculus (house mouse)/Chemical carcinogenesis - reactive oxygen species - Mus musculus (house mouse)/Aldosterone synthesis and secretion - Mus musculus (house mouse)
ENSMUSG00000002699	0.346868491	0.244594357	0.405499547	0.547454557	0.223342474	0.448876166	0.199526826	0.4154546	0.194490279	0.228785826	0.279652561	0.325037346	0.324743577	0.541231145	0.277360412	0.285281216	0.350230377	0.704417542	0.237030379	0.498530608	lymphocyte cytosolic protein 2	GO:0098589/GO:0042101/GO:0045121/GO:0098797/GO:0098805/GO:0005575/GO:0098802/GO:0044853/GO:0098796/GO:0005622/GO:0071702/GO:0008150/GO:0071705/GO:0003674/GO:0098590/GO:0002790/GO:0098857/GO:0042886/GO:0048584/GO:0035592/GO:0071692/GO:0009987/GO:0005829/GO:0005515/GO:0005737/GO:0005886/GO:0050776/GO:0071944/GO:0006810/GO:0036398/GO:0008104/GO:0032940/GO:0050778/GO:0002764/GO:0005911/GO:0043235/GO:…	ISO/IDA/IEA/IMP/IBA/IPI	CC/BP/MF	PF07647/PF00017	Lcp2	Q60787	path:mmu04650/path:mmu04664/path:mmu04660/path:mmu05135/path:mmu04611/path:mmu04380/path:mmu04015	mmu:16822	ko:K07361	Natural killer cell mediated cytotoxicity - Mus musculus (house mouse)/Fc epsilon RI signaling pathway - Mus musculus (house mouse)/T cell receptor signaling pathway - Mus musculus (house mouse)/Yersinia infection - Mus musculus (house mouse)/Platelet activation - Mus musculus (house mouse)/Osteoclast differentiation - Mus musculus (house mouse)/Rap1 signaling pathway - Mus musculus (house mouse)
ENSMUSG00000002718	3.69344556	3.264642629	4.233904338	4.099754683	3.335343156	4.132658775	3.762909221	3.908939497	4.38303535	4.023446027	4.468258447	3.905123483	3.971580927	3.812250969	3.42764557	3.580872472	3.723030398	3.662105054	3.599202623	3.646986111	chromosome segregation 1-like (S. cerevisiae)	GO:0046907/GO:0009987/GO:0051234/GO:0031267/GO:0005635/GO:0051179/GO:0045184/GO:0110165/GO:0017016/GO:0005829/GO:0051641/GO:0003674/GO:0005488/GO:0043227/GO:0017038/GO:0140142/GO:0005515/GO:0005049/GO:0043226/GO:0008536/GO:0016020/GO:0043231/GO:0033036/GO:0005654/GO:0019899/GO:0008104/GO:0005773/GO:0034504/GO:0071705/GO:0006913/GO:0008150/GO:0005622/GO:0005634/GO:0006886/GO:0006810/GO:0051170/GO:…	IEA/IBA/ISO/IPI	BP/MF/CC	PF08506/PF03810/PF03378	Cse1l	Q9ERK4	path:mmu03013/path:mmu05132	mmu:110750	ko:K18423	Nucleocytoplasmic transport - Mus musculus (house mouse)/Salmonella infection - Mus musculus (house mouse)
ENSMUSG00000002728	3.848885858	3.582979347	3.776059225	3.783257385	3.856757496	3.485599769	3.780930502	3.979492642	3.736254718	3.660089883	3.40246423	3.660019432	3.940532518	3.933699701	3.670284309	3.893433219	3.64375812	3.64464927	3.344006815	3.769750957	N(alpha)-acetyltransferase 20 NatB catalytic subunit	GO:0008080/GO:0016407/GO:0016410/GO:0071704/GO:0006473/GO:0005634/GO:0043231/GO:0008150/GO:0008152/GO:0005829/GO:0006474/GO:0005622/GO:0010467/GO:0043412/GO:0005575/GO:0036211/GO:0044267/GO:0005737/GO:0018206/GO:0043229/GO:0110165/GO:0004596/GO:0006464/GO:0044238/GO:0016740/GO:0031414/GO:0031416/GO:0009987/GO:0006807/GO:0016746/GO:0016747/GO:0043227/GO:0044237/GO:0043226/GO:0044260/GO:0003824/GO:…	IBA/ISO/IEA	MF/BP/CC	PF00583	Naa20	P61600/Q9DB82		mmu:67877	ko:K17972
ENSMUSG00000002731	4.7421385	4.659624906	5.019878962	4.478877004	4.656631628	4.701454458	4.643960332	4.501781255	4.522997896	4.593229789	4.508828138	4.388173125	5.021402234	4.873622864	4.816460006	5.013209886	4.712669463	5.170454015	4.630917934	4.675609921	protein kinase interferon inducible double stranded RNA dependent activator	GO:1902494/GO:0006396/GO:0048583/GO:0048584/GO:0051716/GO:0003674/GO:0050794/GO:0032991/GO:0048522/GO:0042221/GO:0032501/GO:0009987/GO:0035196/GO:0043233/GO:0050789/GO:0010647/GO:0003676/GO:0097159/GO:0019901/GO:0033554/GO:0043226/GO:0098772/GO:0048568/GO:0043229/GO:0007165/GO:0048562/GO:0010629/GO:0023051/GO:0110165/GO:0031974/GO:0032502/GO:0043170/GO:0006950/GO:1901564/GO:0010467/GO:1901363/GO:…	ISO/IDA/IEA/IMP/IPI	CC/BP/MF	PF16482/PF00035	Prkra	Q9WTX2		mmu:23992	ko:K24540
ENSMUSG00000002733	5.174624117	4.857149718	5.332022317	4.993259599	5.045132662	5.118988229	5.055090481	5.103693515	5.390460458	5.025534398	4.920775275	4.942725863	4.976995478	5.073456735	5.175850334	5.183961425	4.897358273	5.171498778	4.908805864	5.076566996	pleckstrin homology domain-containing family A (phosphoinositide binding specific) member 3	GO:0043226/GO:0043229/GO:0043227/GO:0043231/GO:0008289/GO:0005575/GO:0005488/GO:0005543/GO:0005622/GO:0009987/GO:0010876/GO:0005794/GO:0043167/GO:0005737/GO:0005548/GO:0012505/GO:0042886/GO:0051649/GO:0070273/GO:1902388/GO:0005773/GO:0035091/GO:0071944/GO:0016020/GO:0005829/GO:0097001/GO:0005886/GO:0046907/GO:0003674/GO:0043168/GO:0051234/GO:0051641/GO:0071702/GO:0046624/GO:0110165/GO:0071705/GO:…	ISO/IBA/IEA	CC/MF/BP	PF00169	Plekha3	Q9ERS4		mmu:83435	ko:K20313
ENSMUSG00000002741	6.645178575	6.918690051	6.793064881	7.237072544	6.576986783	6.519821424	6.546613567	6.893631521	6.526767983	6.477239909	6.961547254	6.68488089	6.697680583	7.041666412	6.617619962	6.466710712	6.941874558	6.931596775	6.759799006	7.089832283	YKT6 v-SNARE homolog (S. cerevisiae)	GO:0016746/GO:0046907/GO:0016050/GO:0016020/GO:0008150/GO:0016043/GO:0012505/GO:0046903/GO:0071705/GO:0005737/GO:0071840/GO:0015833/GO:0009987/GO:0003674/GO:0051648/GO:0003824/GO:0140352/GO:0071702/GO:0016747/GO:0090174/GO:0048193/GO:0019706/GO:0005886/GO:0005484/GO:0071944/GO:0051641/GO:0016021/GO:0098590/GO:0005829/GO:0061024/GO:0005768/GO:0097708/GO:0032940/GO:0140096/GO:0008104/GO:0005739/GO:…	ISS/ISO/IEA	MF/BP/CC	PF13774/PF00957	Ykt6	Q9CQW1	path:mmu04130	mmu:56418	ko:K08516	SNARE interactions in vesicular transport - Mus musculus (house mouse)
ENSMUSG00000002748	6.543535673	6.370465764	6.612727879	6.164292416	6.558618642	6.323826719	6.4704542	6.854572494	6.257852866	6.109094062	6.309806376	6.561043941	6.322361839	6.339493771	6.498124845	6.388392641	6.154398685	6.419958885	6.849886105	6.491846789	bromodomain adjacent to zinc finger domain 1B	GO:0003824/GO:0000785/GO:0043226/GO:0005694/GO:0043231/GO:0043229/GO:0016773/GO:0005657/GO:0004672/GO:0000792/GO:0097367/GO:0006333/GO:0043170/GO:0009987/GO:0016772/GO:0031974/GO:0005721/GO:0043227/GO:0031261/GO:0008152/GO:0005515/GO:0044238/GO:0000793/GO:0031981/GO:0043169/GO:0044237/GO:0000166/GO:0006468/GO:0006796/GO:0008150/GO:0097159/GO:0006996/GO:0071704/GO:0071840/GO:0000775/GO:0016740/GO:…	ISO/IDA/IEA/IPI/NAS	MF/CC/BP	PF10537/PF15613/PF00439/PF15612/PF00628	Baz1b	Q9Z277		mmu:22385	ko:K11658
ENSMUSG00000002763	6.426213329	6.565888673	6.11247191	6.634206561	6.736113762	6.36038603	6.509002483	6.89784907	5.990676258	5.994929858	6.202116526	6.441133215	6.545447954	6.453149392	6.742258536	6.685050982	6.7530606	6.4818721	6.792631695	6.724537845	peroxisomal biogenesis factor 6	GO:0005488/GO:0072663/GO:0071944/GO:0051649/GO:0005515/GO:0072662/GO:0042995/GO:0003824/GO:0031903/GO:0043229/GO:0015833/GO:0071806/GO:0008150/GO:0009987/GO:0071840/GO:0072594/GO:0003674/GO:0045184/GO:0051179/GO:0043226/GO:0030990/GO:0032555/GO:0007031/GO:0046907/GO:0097367/GO:0043227/GO:1901265/GO:0008144/GO:0051641/GO:0006605/GO:0006625/GO:0000166/GO:0005929/GO:0005886/GO:0055085/GO:0043005/GO:…	ISO/IBA/IPI/IEA/IDA	MF/BP/CC	PF00004	Pex6	Q99LC9	path:mmu04146	mmu:224824	ko:K13339	Peroxisome - Mus musculus (house mouse)
ENSMUSG00000002767	6.908034944	7.013209979	6.794690678	7.016566869	6.910564625	7.009325641	6.905850005	6.836807301	6.910182432	6.924560643	6.884961601	6.749107581	6.904965279	6.943253775	7.198720414	7.29666452	6.90408148	6.962110766	7.091408071	6.863828117	mitochondrial ribosomal protein L2	GO:0003674/GO:0005739/GO:0008150/GO:1901566/GO:0032991/GO:0043604/GO:0006412/GO:1901564/GO:0043603/GO:0044260/GO:0044249/GO:0003735/GO:0043043/GO:0031974/GO:0034645/GO:0044238/GO:0043232/GO:0043226/GO:0008152/GO:0043170/GO:0000315/GO:0005622/GO:0000313/GO:0005840/GO:0005762/GO:0043229/GO:0005759/GO:0044237/GO:0043227/GO:0034641/GO:1901576/GO:0005761/GO:0032543/GO:0009059/GO:0043231/GO:0071704/GO:…	IBA/ISA/ISO/HDA/IEA	MF/CC/BP	PF00181/PF03947	Mrpl2	Q9D773	path:mmu03010	mmu:27398	ko:K02886	Ribosome - Mus musculus (house mouse)
ENSMUSG00000002768	7.152597711	6.939980158	6.888000959	7.292899455	7.302425011	7.03246821	7.120008926	7.029463982	6.926180139	7.013219052	6.804523221	7.100912564	6.978924248	7.195816325	7.337920306	7.133858846	7.007038539	7.137892251	7.474410433	7.126204876	male enhanced antigen 1	GO:0003006/GO:0048869/GO:0007283/GO:0032504/GO:0000003/GO:0005575/GO:0005622/GO:0110165/GO:0051704/GO:0048232/GO:0032501/GO:0048856/GO:0009987/GO:0008150/GO:0007276/GO:0032502/GO:0048609/GO:0005737/GO:0022414/GO:0019953/GO:0030154/GO:0007275/GO:0044703	IEA/IDA	BP/CC		Mea1	Q64327		mmu:17256
ENSMUSG00000002769	1.154697058	1.136486402	1.113496306	0.930450205	0.966734383	1.021634771	1.256076929	1.47240108	1.121881258	1.00489439	0.862844554	1.097442412	1.103425624	0.986139093	1.122762066	1.139928362	0.934038482	1.258427536	1.212825145	1.010450943	glycine N-methyltransferase	GO:0044237/GO:0008144/GO:0042165/GO:0042802/GO:0044283/GO:0005976/GO:0043933/GO:0016741/GO:0006790/GO:0043255/GO:0044260/GO:0005977/GO:0005975/GO:0051262/GO:0046364/GO:0051289/GO:0016597/GO:0016740/GO:0019319/GO:0017144/GO:0006730/GO:0042278/GO:0006807/GO:0036094/GO:0006732/GO:0051260/GO:0006575/GO:0010675/GO:0005488/GO:0019842/GO:0097159/GO:0017174/GO:0003674/GO:0008757/GO:0055114/GO:0062012/GO:…	IBA/IDA/IMP/IEA/IPI/ISO	BP/MF/CC	PF13847	Gnmt	Q9QXF8	path:mmu00260/path:mmu01100	mmu:14711	ko:K00552	Glycine serine and threonine metabolism - Mus musculus (house mouse)/Metabolic pathways - Mus musculus (house mouse)
ENSMUSG00000002771	5.093147359	5.062819715	5.286899753	5.045770981	5.541746984	5.135709748	5.439396304	5.403418852	5.059138031	5.382692946	4.597006848	5.064602518	5.633866977	4.745314968	5.306687122	5.50956865	4.930112806	4.837830765	5.690965873	4.787120814	glutamate receptor ionotropic NMDA2D (epsilon 4)	GO:0016020/GO:0099061/GO:0015318/GO:0005230/GO:0099094/GO:0099604/GO:0043168/GO:0007610/GO:0003674/GO:0008324/GO:0099572/GO:0043177/GO:0098794/GO:0098771/GO:0043235/GO:0055082/GO:0022834/GO:0016597/GO:0050905/GO:0051234/GO:0043167/GO:0005261/GO:0097060/GO:0007268/GO:0016021/GO:0007600/GO:0016595/GO:0098660/GO:0051239/GO:0072503/GO:0072511/GO:0051179/GO:0031224/GO:0043005/GO:0098793/GO:0022832/GO:…	IEA/IBA/ISO/IDA/IMP	CC/MF/BP	PF01094/PF00060/PF10613	Grin2d	Q03391	path:mmu05034/path:mmu05020/path:mmu04720/path:mmu04024/path:mmu05017/path:mmu04080/path:mmu05010/path:mmu04724/path:mmu05014/path:mmu04713/path:mmu05022/path:mmu05031/path:mmu04020/path:mmu05030/path:mmu05033	mmu:14814	ko:K05212	Alcoholism - Mus musculus (house mouse)/Prion disease - Mus musculus (house mouse)/Long-term potentiation - Mus musculus (house mouse)/cAMP signaling pathway - Mus musculus (house mouse)/Spinocerebellar ataxia - Mus musculus (house mouse)/Neuroactive ligand-receptor interaction - Mus musculus (house mouse)/Alzheimer disease - Mus musculus (house mouse)/Glutamatergic synapse - Mus musculus (house …
ENSMUSG00000002778	7.086726189	7.500840984	7.483676338	7.709884576	7.396437243	7.309549156	7.152402935	7.512569622	6.958693372	7.069941997	7.454957471	7.540654005	7.231200959	7.68101839	7.346594789	7.433092011	7.78715991	7.839316883	7.31319318	7.756408421	KDEL (Lys-Asp-Glu-Leu) endoplasmic reticulum protein retention receptor 1	GO:0051179/GO:0002521/GO:0008104/GO:0006915/GO:0031090/GO:0110165/GO:0003674/GO:0002520/GO:0005046/GO:0051234/GO:0005048/GO:0050896/GO:0048513/GO:0030663/GO:0043231/GO:0002449/GO:0002456/GO:0006810/GO:0030662/GO:0048731/GO:0005783/GO:0048534/GO:0005773/GO:0008150/GO:0045184/GO:0043229/GO:0016020/GO:0043227/GO:0048856/GO:0030659/GO:0048869/GO:0002376/GO:0032502/GO:0005886/GO:0008219/GO:0030137/GO:…	IBA/IMP/ISO/IEA/IDA	BP/CC/MF	PF00810	Kdelr1	Q99JH8		mmu:68137	ko:K10949
ENSMUSG00000002781	5.333963226	5.581074625	5.211504581	5.625198062	5.847111939	5.476823454	5.559168412	5.387590613	5.089546292	5.355027087	5.279760324	5.396618253	5.497092799	5.651803579	5.576062002	5.69223226	5.202934096	5.757219134	5.522655067	5.263072133	transmembrane protein 143	GO:0048534/GO:0043231/GO:0048731/GO:0048513/GO:0048869/GO:0043229/GO:0005739/GO:0043226/GO:0032502/GO:0002376/GO:0048856/GO:0110165/GO:0005575/GO:0005622/GO:0030154/GO:0031224/GO:0043227/GO:0002520/GO:0002244/GO:0009987/GO:0032501/GO:0005737/GO:0016021/GO:0008150/GO:0007275/GO:0003674/GO:0016020/GO:0030097	IMP/ISO/IBA/HDA/IEA/ND	BP/CC/MF	PF12576	Tmem143	G3X9F4/Q8VD26		mmu:70209
ENSMUSG00000002797	6.11407441	5.760381253	5.897225795	5.518056946	5.63724915	6.064406557	6.087669053	5.906820694	6.048859315	6.200130383	5.665080628	5.99267634	5.939498541	5.953697491	5.516371191	5.763087571	5.953016911	5.920465438	5.899883735	5.758268345	gamma-glutamyl cyclotransferase	GO:0009987/GO:0065007/GO:0050789/GO:0005622/GO:0001836/GO:0071840/GO:0008637/GO:0003839/GO:0110165/GO:0042802/GO:0042803/GO:0008219/GO:0046983/GO:0005737/GO:0050896/GO:0051716/GO:0016829/GO:0005515/GO:0003674/GO:0007154/GO:0006996/GO:0005829/GO:0008150/GO:0097190/GO:0016840/GO:0003824/GO:0012501/GO:0050794/GO:0007005/GO:0016043/GO:0016842/GO:0006915/GO:0007165/GO:0005575/GO:0023052/GO:0005488	ISO/IEA	BP/CC/MF		Ggct	Q9D7X8	path:mmu01100/path:mmu00480	mmu:110175	ko:K00682	Metabolic pathways - Mus musculus (house mouse)/Glutathione metabolism - Mus musculus (house mouse)
ENSMUSG00000002799	5.008506982	4.471259232	4.505019297	4.453483247	4.625243008	4.863270009	5.055073725	4.821694046	4.718379439	4.912617992	4.337319929	4.433056969	5.17314377	4.206316012	5.059972769	4.954693966	4.454598406	4.412103549	5.141382053	4.290482101	jagged 2	GO:0007275/GO:0009887/GO:0030217/GO:0003674/GO:0007276/GO:0009987/GO:0008150/GO:0050794/GO:0005622/GO:0007283/GO:0031224/GO:0050896/GO:0009888/GO:0065007/GO:0110165/GO:0009792/GO:0042490/GO:0030182/GO:0048585/GO:0042491/GO:0042110/GO:0060561/GO:0048598/GO:0005575/GO:0023052/GO:0048731/GO:0045321/GO:0016021/GO:0032502/GO:0042476/GO:0005112/GO:0030855/GO:0002009/GO:0005515/GO:0048869/GO:0002521/GO:…	ISS/IMP/ISO/IPI/IBA/IDA/IEA/NAS	BP/MF/CC	PF00008/PF07657/PF12661/PF01414/PF07645	Jag2	Q9QYE5	path:mmu01522/path:mmu05224/path:mmu05200/path:mmu04330/path:mmu04658	mmu:16450	ko:K21635	Endocrine resistance - Mus musculus (house mouse)/Breast cancer - Mus musculus (house mouse)/Pathways in cancer - Mus musculus (house mouse)/Notch signaling pathway - Mus musculus (house mouse)/Th1 and Th2 cell differentiation - Mus musculus (house mouse)
ENSMUSG00000002803	5.704921621	5.984409206	5.432532673	5.80836954	5.801054198	5.581638901	5.724837247	6.004843799	5.607878672	6.044672846	5.825119555	5.791431151	5.707212983	5.973285676	5.597221179	6.329249815	5.56300493	5.71564852	5.923368753	5.717594373	BTB (POZ) domain containing 6	GO:0005622/GO:0030154/GO:0032501/GO:0005575/GO:0048731/GO:0008150/GO:0007399/GO:0009987/GO:0032502/GO:0007275/GO:0110165/GO:0005829/GO:0048869/GO:0022008/GO:0005737/GO:0048856	IBA/IEA	CC/BP	PF08005/PF07707/PF00651	Btbd6	G5E817/Q8K2J9		mmu:399566	ko:K10478
ENSMUSG00000002804	4.835383908	5.424462486	4.996634945	4.809679745	5.566085816	4.632444563	5.146488197	4.936856349	4.93392707	4.975902828	4.920074161	4.546226561	5.011018757	5.198529901	5.349295322	4.993899333	5.083158263	5.065266864	5.390619436	4.685289136	nudix (nucleoside diphosphate linked moiety X)-type motif 14	GO:0003674/GO:0046872/GO:0008152/GO:0016787/GO:0009987/GO:0044281/GO:0008768/GO:0046483/GO:0016817/GO:0110165/GO:0003824/GO:0016462/GO:1901360/GO:0071704/GO:0005737/GO:1901135/GO:0055086/GO:0047631/GO:0005622/GO:0006725/GO:0006796/GO:0006139/GO:0016818/GO:0005515/GO:0005488/GO:0006807/GO:0043167/GO:0044238/GO:0005575/GO:0042802/GO:0044237/GO:0019637/GO:0043169/GO:0006793/GO:0034641/GO:0008150/GO:…	IDA/IEA/ISO/IBA	MF/BP/CC	PF00293	Nudt14	A0A217FL49/Q9D142		mmu:66174	ko:K08077
ENSMUSG00000002808	6.953340984	6.40975951	6.845374436	6.666411629	6.685942089	6.794589917	6.698421166	6.733215891	7.124841012	6.887105563	6.466133302	6.552859763	6.833412365	7.123402814	6.801633442	6.678988251	6.664507824	6.801270139	6.585351169	6.483830804	ependymin related protein 1 (zebrafish)	GO:0005576/GO:0043167/GO:0043169/GO:0043227/GO:0008150/GO:0031589/GO:0007160/GO:0005737/GO:0110165/GO:0003674/GO:0005615/GO:0046872/GO:0008289/GO:0005575/GO:0043226/GO:0005509/GO:0000323/GO:0005622/GO:0022610/GO:0043229/GO:0005488/GO:0009987/GO:0005773/GO:0005764/GO:0043231/GO:0007155	IEA/IDA/ND/HDA	CC/MF/BP	PF00811	Epdr1	Q99M71		mmu:105298
ENSMUSG00000002812	6.829339795	6.64663836	6.734024536	7.287821482	7.122788068	7.071351983	6.898539331	7.290162149	6.775034593	6.647516643	6.636646491	7.06771215	6.597455321	6.799097628	7.134788729	7.247979373	6.910050624	7.276957584	7.290863573	6.996060998	flightless I actin binding protein	GO:0043226/GO:0003779/GO:0098590/GO:0098862/GO:0070013/GO:0043227/GO:0005515/GO:0008150/GO:0005575/GO:0030029/GO:0098858/GO:0071944/GO:0005634/GO:0015630/GO:0043229/GO:0009987/GO:0071840/GO:0003674/GO:0030036/GO:0043228/GO:0031981/GO:0099080/GO:0032501/GO:0042995/GO:0015629/GO:0099512/GO:0099081/GO:0030054/GO:0016043/GO:0099513/GO:0120025/GO:0032432/GO:0016020/GO:0051015/GO:0005737/GO:0005815/GO:…	IEA/IDA/ISO/IPI/IMP/TAS	CC/MF/BP	PF00626/PF12799/PF13855	Flii	Q9JJ28		mmu:14248
ENSMUSG00000002814	2.522239829	2.497891968	2.515606373	2.74089105	2.803970389	2.588481413	2.89481042	2.544898642	2.487570426	3.015154784	2.62202735	2.533002521	2.413349724	2.287240701	2.44668356	2.475509437	2.547256429	2.756681008	2.714198223	2.607429835	topoisomerase (DNA) III alpha	GO:0005575/GO:0005737/GO:0110165/GO:0016853/GO:0005739/GO:0043229/GO:0006807/GO:0043227/GO:0044260/GO:0003677/GO:0070013/GO:0009987/GO:0008152/GO:0043228/GO:0005488/GO:0006725/GO:0003676/GO:0003824/GO:0043231/GO:0006139/GO:0071103/GO:0051304/GO:0006265/GO:0016604/GO:0006996/GO:1901363/GO:0051276/GO:0034641/GO:0016043/GO:0043226/GO:0005654/GO:0005622/GO:0003916/GO:0003917/GO:0046914/GO:0097159/GO:…	IEA/ISO/IBA	CC/MF/BP	PF01751/PF01396/PF01131/PF06839	Top3a	Q5NCT2/O70157	path:mmu03460/path:mmu03440	mmu:21975	ko:K03165	Fanconi anemia pathway - Mus musculus (house mouse)/Homologous recombination - Mus musculus (house mouse)
ENSMUSG00000002820	5.424695977	6.005275018	5.502286115	5.468818304	5.880456051	5.521073118	5.336103467	5.353159196	5.11616555	5.405308444	4.860207175	5.392141147	5.698219218	5.391203022	6.355716266	5.83722729	5.021251427	5.368163537	5.826471203	5.204410056	autophagy related 4D cysteine peptidase	GO:0008152/GO:0070011/GO:0008219/GO:0044237/GO:0061919/GO:0033036/GO:0006807/GO:0044238/GO:0019538/GO:0009056/GO:0015031/GO:0140096/GO:0009987/GO:0043231/GO:0043229/GO:0015833/GO:0008234/GO:0043227/GO:1901564/GO:0042886/GO:0071704/GO:0005622/GO:0012501/GO:0008104/GO:0016787/GO:0071705/GO:0006914/GO:0071702/GO:0008150/GO:0008233/GO:0006810/GO:0044248/GO:0005737/GO:0003674/GO:0045184/GO:0005575/GO:…	IEA	BP/MF/CC	PF03416	Atg4d	Q8BGV9	path:mmu04140/path:mmu04136	mmu:235040	ko:K08342	Autophagy - animal - Mus musculus (house mouse)/Autophagy - other - Mus musculus (house mouse)
ENSMUSG00000002825	2.768863561	3.337655903	3.218049708	3.15984034	3.302908898	3.153655276	3.447523113	3.145366704	3.388049582	2.855234974	3.120275642	3.109701025	3.384060482	3.291303554	2.891722523	3.036828598	3.694827008	3.305550636	3.284208443	3.384966841	queuine tRNA-ribosyltransferase catalytic subunit 1	GO:0006725/GO:0044237/GO:0043231/GO:0006400/GO:0043412/GO:0043227/GO:0044238/GO:0009451/GO:0006399/GO:0010467/GO:0009987/GO:0016740/GO:0043170/GO:0006396/GO:0046483/GO:0016020/GO:0016757/GO:0043229/GO:0043226/GO:0005741/GO:0008479/GO:0034660/GO:0140098/GO:0046872/GO:0008152/GO:0046982/GO:0101030/GO:0016070/GO:1901360/GO:0140101/GO:0006139/GO:0003824/GO:0005575/GO:0005739/GO:0005740/GO:0008150/GO:…	IDA/ISO/IEA/IBA/IPI	BP/CC/MF	PF01702	Qtrt1	Q9JMA2		mmu:60507	ko:K00777
ENSMUSG00000002831	2.868391012	3.706004227	3.518699485	4.097305179	3.604599208	3.173939503	3.805467349	4.190098187	2.827857627	3.017727188	3.756961636	3.574528795	3.25016724	3.490255321	3.742917306	3.100542333	3.983728054	3.450836089	3.300002208	3.645191829	perilipin 4	GO:0016020/GO:0043226/GO:0071944/GO:0005886/GO:0043227/GO:0110165/GO:0043231/GO:0043229/GO:0005575/GO:0043232/GO:0005737/GO:0005622/GO:0043228/GO:0005811/GO:0005829	IEA/ISO/IDA/IBA	CC	PF03036	Plin4	O88492	path:mmu03320	mmu:57435	ko:K20254	PPAR signaling pathway - Mus musculus (house mouse)
ENSMUSG00000002833	6.279624728	6.231144978	6.198764368	6.371479449	6.245730809	5.791383496	6.238075349	6.536607708	5.938619816	6.057488733	6.30442194	6.21496811	6.154461791	5.660569181	6.360988443	6.07034077	5.862341087	6.253102622	6.402770356	6.1912902	HDGF like 2	GO:0048518/GO:0030307/GO:0008150/GO:0040007/GO:0016043/GO:0016049/GO:0071840/GO:0043226/GO:0003674/GO:0043231/GO:0005634/GO:0050789/GO:0040008/GO:0005622/GO:0005488/GO:0110165/GO:0065007/GO:0051128/GO:0009987/GO:0043229/GO:0050794/GO:0001558/GO:0005575/GO:0003682/GO:0005515/GO:0043227/GO:0048522/GO:0045927	ISO/IDA/IPI	BP/CC/MF	PF00855/PF11467	Hdgfl2	Q3UMU9		mmu:15193	ko:K25065
ENSMUSG00000002835	0.408119146	0.201633343	0.336116526	0.213053815	0.201721082	0.465146239	0.591293561	0.344399489	0.314252765	0.395776435	0.262250448	0.308744617	0.210356351	0.294353335	0.256832367	0.265535528	0.226810613	0.305952501	0.319183296	0.404276682	chromatin assembly factor 1 subunit A (p150)	GO:0006139/GO:0032991/GO:0006259/GO:0071897/GO:0006334/GO:0005622/GO:0008150/GO:0090304/GO:0065003/GO:0005694/GO:0005634/GO:0007049/GO:0031974/GO:0034728/GO:0019904/GO:0019438/GO:0022607/GO:0065004/GO:0071840/GO:0031981/GO:0006260/GO:0006333/GO:0031497/GO:0006996/GO:0043227/GO:1901576/GO:0046483/GO:0000785/GO:0043231/GO:0070013/GO:0070087/GO:0034645/GO:0043933/GO:0071103/GO:0006281/GO:0033186/GO:…	IEA/IBA/ISO/IPI	BP/CC/MF	PF12253/PF15539/PF15557	Chaf1a	Q9QWF0		mmu:27221	ko:K10750
ENSMUSG00000002844	1.938496251	1.495107688	1.692661913	1.863817533	1.459102915	1.439464379	1.619876539	1.640182723	1.932461323	1.623327083	1.694464847	1.698475218	1.915564216	1.590699357	1.475761287	1.61776686	1.844201505	1.36662607	1.571644561	1.549979676	ADP-ribosylarginine hydrolase	GO:0030234/GO:0005622/GO:0016787/GO:0044237/GO:0015031/GO:0016799/GO:0006807/GO:0005615/GO:0006464/GO:0009987/GO:0030695/GO:0005737/GO:0008152/GO:0043170/GO:0016798/GO:0005829/GO:0019538/GO:0043412/GO:0005488/GO:0003824/GO:0043169/GO:0005576/GO:0044093/GO:0008150/GO:0003875/GO:0044260/GO:0016462/GO:0005515/GO:0017111/GO:0044267/GO:0051179/GO:0046872/GO:0043167/GO:0005575/GO:0043547/GO:0003674/GO:…	IBA/ISO/IMP/IEA	MF/CC/BP	PF03747	Adprh	P54923/Q3U5N4		mmu:11544	ko:K01245
ENSMUSG00000002845	1.690181276	1.961622748	2.180974659	1.562352503	1.628217254	1.876184683	1.492945373	1.819302982	1.705928063	1.882555867	2.053704439	1.55795972	1.740359954	2.084492212	1.712287994	1.603673677	1.87734567	1.720880337	1.678333577	1.735590241	transmembrane protein 39a	GO:0016020/GO:0005575/GO:0003674/GO:0031224/GO:0110165/GO:0016021	IEA/ND	CC/MF	PF10271	Tmem39a	Q9CYC3		mmu:67846
ENSMUSG00000002846	2.717251591	2.64993622	2.735438112	2.755748611	2.681765443	2.909259974	3.032063442	2.625638645	2.707458699	2.699696728	2.575538228	2.695423401	2.584994796	2.903208747	2.45641246	3.235581167	3.138795014	2.800441498	2.930636127	2.508710246	translocase of inner mitochondrial membrane domain containing 1	GO:0110165/GO:0005654/GO:0043227/GO:0005575/GO:0005737/GO:0005622/GO:0005634/GO:0008150/GO:0043229/GO:0005739/GO:0031981/GO:0016021/GO:0043231/GO:0016020/GO:0043226/GO:0003674/GO:0031224/GO:0031974/GO:0070013/GO:0043233	ISO/HDA/IEA/ND	CC/BP/MF		Timmdc1	Q8BUY5		mmu:76916	ko:K23505
ENSMUSG00000002847	0.599963823	0.562963923	0.64270909	0.685976029	0.631156461	0.580871683	0.711819288	0.819628471	0.722658754	0.690240248	0.857858683	0.613403102	0.526317155	0.674508172	0.69742774	0.586734777	0.729811947	0.903606698	0.790558239	0.61671849	phospholipase A1 member A	GO:0110165/GO:0097708/GO:0099503/GO:0003674/GO:0005576/GO:1901575/GO:0004620/GO:0008970/GO:0098805/GO:0008152/GO:0001669/GO:0005773/GO:0016787/GO:0016788/GO:0012505/GO:0031090/GO:0005737/GO:0005575/GO:0006629/GO:0005622/GO:0044238/GO:0043226/GO:0030659/GO:0016042/GO:0005615/GO:0043231/GO:0031982/GO:0012506/GO:0071704/GO:0009056/GO:0030667/GO:0008150/GO:0052689/GO:0098588/GO:0030141/GO:0031410/GO:…	IDA/IBA/IEA/HDA	CC/MF/BP	PF00151	Pla1a	Q8VI78	path:mmu04014/path:mmu00564	mmu:85031	ko:K13618	Ras signaling pathway - Mus musculus (house mouse)/Glycerophospholipid metabolism - Mus musculus (house mouse)
ENSMUSG00000002870	3.390342928	3.233068921	3.219884569	3.231396982	3.314219502	3.297569089	2.986868787	3.202508519	3.121072003	3.191820456	3.106245305	3.137478868	3.038884459	3.436939519	3.218040848	3.267751343	3.192595378	3.230153197	3.637960503	3.404254857	minichromosome maintenance complex component 2	GO:0043565/GO:0004386/GO:0005575/GO:0032392/GO:0070670/GO:0043170/GO:0007049/GO:0006281/GO:0043583/GO:1901576/GO:0070887/GO:0050794/GO:0000724/GO:0005488/GO:0043169/GO:1901362/GO:0032559/GO:0019438/GO:0012501/GO:0032555/GO:0044237/GO:0071704/GO:0097373/GO:0043462/GO:0006334/GO:0005524/GO:0006333/GO:0070013/GO:0034654/GO:0017111/GO:0006270/GO:0003824/GO:0044092/GO:0006996/GO:0043227/GO:0051129/GO:…	IDA/IBA/IEA/ISO/TAS/IPI	MF/CC/BP	PF14551/PF17207/PF17855/PF00493/PF12619	Mcm2	P97310	path:mmu03030/path:mmu04110	mmu:17216	ko:K02540	DNA replication - Mus musculus (house mouse)/Cell cycle - Mus musculus (house mouse)
ENSMUSG00000002871	5.648816493	6.097129156	5.594012431	5.852150402	6.283953221	5.776938573	6.250615137	6.00776186	5.530906382	6.046881785	5.61513145	5.622498027	5.835670961	5.605872298	6.13099989	6.327215688	5.778944947	5.596348636	6.219361912	5.773883415	transmembrane protein adipocyte asscociated 1	GO:0051301/GO:0044772/GO:0010564/GO:0007346/GO:0005886/GO:0032502/GO:0050794/GO:0044770/GO:0016043/GO:0040016/GO:0110165/GO:1901987/GO:0000278/GO:0000280/GO:0005575/GO:0045786/GO:0006996/GO:0010948/GO:0048856/GO:0071944/GO:0016020/GO:0007049/GO:0007275/GO:0065007/GO:0140014/GO:0048285/GO:0048519/GO:0032501/GO:1901988/GO:0048523/GO:1903047/GO:1901991/GO:0022402/GO:0008150/GO:0016021/GO:0045930/GO:…	IMP/ISO/IEA	BP/CC	PF10160	Tpra1	Q99MU1		mmu:24100	ko:K22988
ENSMUSG00000002881	4.028102934	3.519979994	4.156704278	3.77986554	4.081228983	4.23335624	3.902178757	3.757968021	4.187444351	4.051664584	4.341319158	3.707622925	3.398130368	3.717762794	3.945170155	4.016054603	4.094367211	3.954838484	3.738356219	4.070801958	Ngfi-A binding protein 1	GO:0001958/GO:0031326/GO:0090304/GO:0003674/GO:0045892/GO:0001503/GO:0044238/GO:0019219/GO:0010467/GO:0009887/GO:0071704/GO:0044237/GO:0019222/GO:0031327/GO:0006351/GO:2001141/GO:0043229/GO:0060255/GO:0010558/GO:0001501/GO:0006139/GO:0009653/GO:0009888/GO:0008366/GO:0009889/GO:0009059/GO:0032501/GO:0050793/GO:0007422/GO:0080090/GO:0010001/GO:0045682/GO:0050789/GO:0065007/GO:0043226/GO:0044260/GO:…	IGI/IBA/IDA/IEA	BP/MF/CC	PF04904/PF04902/PF04905	Nab1	A0A087WSU4/Q61122		mmu:17936	ko:K22388
ENSMUSG00000002885	4.705140384	4.940523459	5.223341297	5.517047835	4.967426332	4.65282223	4.426686181	4.848555051	4.561133065	4.526864704	5.176522098	5.016271447	4.781583586	5.278325093	4.89701828	4.590900322	5.25619608	5.411053193	4.644282369	5.274202116	adhesion G protein-coupled receptor E5	GO:0071944/GO:0043167/GO:0051240/GO:0008150/GO:0007416/GO:0046872/GO:0007188/GO:0065008/GO:0065007/GO:0007189/GO:0048518/GO:0016021/GO:0048522/GO:0048856/GO:0003674/GO:1902531/GO:0005886/GO:0019933/GO:0019935/GO:0065009/GO:0022610/GO:0048583/GO:1901890/GO:0019932/GO:0023052/GO:0007165/GO:0022607/GO:0016020/GO:0048731/GO:0005887/GO:0016043/GO:0007154/GO:0110165/GO:0007190/GO:0071840/GO:0031224/GO:…	IEA/IDA/IBA/TAS	CC/MF/BP	PF00002/PF07645/PF01825	Adgre5	E9QMJ5/A0A0D9SEG8/Q9Z0M6/Q9DC42/E9QJS7		mmu:26364	ko:K08446
ENSMUSG00000002897	5.056266396	5.694507826	5.35319739	5.688925582	4.975277946	5.316733706	4.772808017	5.42180621	4.976265187	4.950951664	5.620233441	5.705902538	5.19217411	5.788464246	4.720019718	5.491125808	5.215321118	5.458671687	5.201840945	5.686931762	interleukin 17 receptor A	GO:0009620/GO:0110165/GO:0051047/GO:0009607/GO:0001817/GO:0032101/GO:0031349/GO:0035592/GO:0015833/GO:0010646/GO:0008150/GO:0006952/GO:0009987/GO:0050663/GO:0050708/GO:0051049/GO:0001819/GO:0032880/GO:0050707/GO:0051179/GO:0010033/GO:0048518/GO:0038023/GO:0051716/GO:0071345/GO:0010647/GO:0140352/GO:0032940/GO:0032754/GO:0140375/GO:1900017/GO:1903530/GO:0070887/GO:0060326/GO:0050727/GO:0001816/GO:…	IMP/IDA/IGI/ISO/IEA/IBA/IPI	BP/CC/MF	PF16556/PF08357	Il17ra	Q60943	path:mmu04657/path:mmu04060/path:mmu04936	mmu:16172	ko:K05164	IL-17 signaling pathway - Mus musculus (house mouse)/Cytokine-cytokine receptor interaction - Mus musculus (house mouse)/Alcoholic liver disease - Mus musculus (house mouse)
ENSMUSG00000002900	2.608397873	2.502089953	2.18460674	2.099386717	2.690750242	2.600603098	2.508253941	2.203446451	2.599203634	2.518518602	2.653479871	2.165200713	2.470049766	2.570504503	2.493582571	2.422603735	2.315374447	2.561972512	2.506827368	2.25120086	laminin B1	GO:2000145/GO:0048519/GO:0007417/GO:0007610/GO:0003008/GO:0031589/GO:0007611/GO:0009987/GO:2000147/GO:0000904/GO:0040011/GO:0110165/GO:0005515/GO:0034446/GO:0007399/GO:0009888/GO:0120036/GO:0007420/GO:0016043/GO:0008150/GO:0007565/GO:0050877/GO:0048513/GO:0097367/GO:0032501/GO:0003674/GO:0022610/GO:0043231/GO:0043256/GO:0005201/GO:0007155/GO:0048518/GO:0007566/GO:0050839/GO:0005488/GO:0048522/GO:…	ISO/IDA/NAS/IBA/IEA/IMP/IPI/RCA/HDA	BP/CC/MF	PF00055/PF00053	Lamb1	Q3UHL7/E9QN70/P02469	path:mmu05165/path:mmu05200/path:mmu04512/path:mmu05222/path:mmu04510/path:mmu04151/path:mmu05146/path:mmu05145	mmu:16777	ko:K05636	Human papillomavirus infection - Mus musculus (house mouse)/Pathways in cancer - Mus musculus (house mouse)/ECM-receptor interaction - Mus musculus (house mouse)/Small cell lung cancer - Mus musculus (house mouse)/Focal adhesion - Mus musculus (house mouse)/PI3K-Akt signaling pathway - Mus musculus (house mouse)/Amoebiasis - Mus musculus (house mouse)/Toxoplasmosis - Mus musculus (house mouse)
ENSMUSG00000002908	4.498354997	4.383246565	4.387262891	3.980775509	4.916199977	4.563187458	4.530966731	4.408542558	4.49865653	4.771263626	4.046046432	4.011185183	4.561436723	4.247795954	4.969768028	4.627275922	4.073931892	3.944326973	4.969341282	4.297636128	potassium intermediate/small conductance calcium-activated channel subfamily N member 1	GO:0005216/GO:0008324/GO:0022836/GO:0015075/GO:0005261/GO:0022857/GO:0005215/GO:0044297/GO:0015077/GO:0043005/GO:0022803/GO:0015079/GO:0005267/GO:0043025/GO:0034220/GO:0120025/GO:0008150/GO:0022890/GO:0005227/GO:0005575/GO:0015267/GO:0009987/GO:0036477/GO:0003674/GO:0055085/GO:0006813/GO:0042995/GO:0015318/GO:0022839/GO:0051234/GO:0016286/GO:0051179/GO:0110165/GO:0005622/GO:0046873/GO:0006810/GO:…	IEA/IBA/ISO/IDA	MF/CC/BP	PF07885/PF03530/PF02888	Kcnn1	A0A140T8Q8/Q9EQR3	path:mmu04911/path:mmu04929	mmu:84036	ko:K04942	Insulin secretion - Mus musculus (house mouse)/GnRH secretion - Mus musculus (house mouse)
ENSMUSG00000002910	4.862318763	4.653239863	4.489638489	4.828537859	5.192956357	5.003056334	4.8170769	5.130151424	4.74035114	4.5996745	3.954892112	4.364082941	4.148522316	4.602573514	4.696763079	4.590691189	4.353291569	4.560176029	5.213918901	4.867936231	arrestin domain containing 2	GO:0008150/GO:0005622/GO:0071944/GO:0005737/GO:0005886/GO:0031410/GO:0005575/GO:0043227/GO:0043229/GO:0097708/GO:0003674/GO:0016020/GO:0031982/GO:0110165/GO:0043226	ND/ISO	BP/CC/MF	PF02752/PF00339	Arrdc2	Q9D668		mmu:70807
ENSMUSG00000002930	0.51041884	0.519068476	0.420045862	0.356959587	0.4078412	0.354935617	0.367517474	0.734668399	0.484825463	0.581617599	0.376904595	0.333317102	0.508514662	0.757868029	0.380556763	0.387606246	0.539999433	0.331697818	0.339534211	0.509577278	protein phosphatase 1 regulatory subunit 17	GO:0008152/GO:0010921/GO:0050790/GO:0065007/GO:0019899/GO:0019902/GO:0005622/GO:0006796/GO:0009987/GO:0044092/GO:0051336/GO:0031323/GO:0050789/GO:0003674/GO:0031974/GO:0016788/GO:0005737/GO:0070013/GO:0043231/GO:0035303/GO:0043233/GO:0110165/GO:0004865/GO:0030234/GO:0031981/GO:0005634/GO:0098772/GO:0050794/GO:0065009/GO:0140096/GO:0044237/GO:0043227/GO:0004857/GO:0019903/GO:0005654/GO:0042578/GO:…	IDA/ISO/TAS	BP/MF/CC		Ppp1r17	Q9Z2E4	path:mmu04730	mmu:19051	ko:K08067	Long-term depression - Mus musculus (house mouse)
ENSMUSG00000002948	7.238963367	7.3778513	6.889931954	7.212664288	7.464765998	7.087950863	7.275355326	7.165147969	7.267305594	7.205421029	6.955814793	7.088976541	7.23413821	7.271404114	7.199179448	7.283278969	6.900170747	7.016754271	7.414286229	7.338262902	mitogen-activated protein kinase kinase 7	GO:0043549/GO:0032270/GO:1902531/GO:0043523/GO:0051403/GO:0010562/GO:0033674/GO:0034641/GO:0010468/GO:0019438/GO:0033554/GO:0043410/GO:0032147/GO:0009059/GO:0009408/GO:0043226/GO:0051973/GO:0010033/GO:0060249/GO:0009987/GO:0032206/GO:0009314/GO:0050790/GO:0034097/GO:0010557/GO:0043227/GO:0007154/GO:0044093/GO:0010556/GO:0005575/GO:0016740/GO:0051716/GO:0018130/GO:0065003/GO:0008219/GO:0044238/GO:…	ISO/IBA/IMP/IPI	BP/CC/MF	PF00069	Map2k7	Q8CE90	path:mmu05417/path:mmu05208/path:mmu04912/path:mmu04664/path:mmu05167/path:mmu04936/path:mmu04660/path:mmu04926/path:mmu05418/path:mmu04012/path:mmu04380/path:mmu04010/path:mmu05135/path:mmu05170/path:mmu05132/path:mmu05016/path:mmu04620/path:mmu04668/path:mmu05010/path:mmu05169/path:mmu05161/path:mmu04530/path:mmu04722/path:mmu04141/path:mmu05022	mmu:26400	ko:K04431	Lipid and atherosclerosis - Mus musculus (house mouse)/Chemical carcinogenesis - reactive oxygen species - Mus musculus (house mouse)/GnRH signaling pathway - Mus musculus (house mouse)/Fc epsilon RI signaling pathway - Mus musculus (house mouse)/Kaposi sarcoma-associated herpesvirus infection - Mus musculus (house mouse)/Alcoholic liver disease - Mus musculus (house mouse)/T cell receptor signal…
ENSMUSG00000002949	4.911291945	4.823594923	4.828374301	4.902971225	4.812360513	4.965178575	4.823181726	5.080652793	5.084168907	4.843918295	4.970493834	4.592749583	4.817749001	4.671692685	5.165501482	5.030659786	4.461481538	4.786429261	4.864943296	4.990974792	translocase of inner mitochondrial membrane 44	GO:0009987/GO:0016020/GO:0003674/GO:0043226/GO:0005515/GO:0005488/GO:0051649/GO:0015031/GO:0017038/GO:0017076/GO:0019866/GO:0015833/GO:0055085/GO:0070727/GO:0071702/GO:0051234/GO:0071705/GO:0051179/GO:0008144/GO:0031090/GO:0000166/GO:0065002/GO:0051641/GO:0070013/GO:0008150/GO:0008104/GO:0006996/GO:0043227/GO:0006810/GO:0042886/GO:0097159/GO:0045184/GO:0043229/GO:0070585/GO:0031966/GO:0033036/GO:…	IBA/HDA/IEA/ISO	BP/CC/MF	PF04280	Timm44	O35857		mmu:21856	ko:K17804
ENSMUSG00000002957	6.747183733	6.577095425	6.523019145	6.4413151	6.907263924	6.807111306	6.488379365	6.854638922	6.299461952	6.418049059	6.611661009	6.791474537	6.792928207	6.095101323	6.71204792	6.78281066	6.501276488	6.682364939	6.83689778	6.61139448	adaptor-related protein complex 2 alpha 2 subunit	GO:0098588/GO:0012506/GO:0030131/GO:0048856/GO:0015031/GO:0097718/GO:0003674/GO:0043226/GO:0098805/GO:0005488/GO:0006900/GO:0006996/GO:0010324/GO:0030154/GO:0012505/GO:0030141/GO:0032501/GO:0030132/GO:0032991/GO:0048534/GO:0005886/GO:0031982/GO:0045595/GO:0050793/GO:0048513/GO:0051179/GO:0098797/GO:0043167/GO:0030139/GO:0005773/GO:0098590/GO:0046907/GO:0051234/GO:0034613/GO:0016020/GO:0030120/GO:…	ISO/IDA/IEA/NAS/IPI/TAS	CC/BP/MF	PF02883/PF02296/PF01602	Ap2a2	Q69ZW4/P17427/Q6PEE6	path:mmu05016/path:mmu04144/path:mmu04721/path:mmu04961	mmu:11772	ko:K11824	Huntington disease - Mus musculus (house mouse)/Endocytosis - Mus musculus (house mouse)/Synaptic vesicle cycle - Mus musculus (house mouse)/Endocrine and other factor-regulated calcium reabsorption - Mus musculus (house mouse)
ENSMUSG00000002963	5.252088676	5.499417996	5.209836597	5.117107574	5.536053468	4.601064625	5.094682509	5.225020163	4.914685616	5.097699225	5.134461334	5.477114884	5.232936784	5.363717087	5.307836465	5.825503885	5.501920525	5.219913997	5.168170889	5.296629585	polynucleotide kinase 3'- phosphatase	GO:0042578/GO:1901363/GO:0005634/GO:0051054/GO:0005575/GO:0005622/GO:0034641/GO:0003824/GO:1904356/GO:1904353/GO:0005524/GO:0035639/GO:0050789/GO:0036211/GO:1901564/GO:1901576/GO:0010836/GO:0043228/GO:0050145/GO:0043229/GO:0034654/GO:0051052/GO:0010638/GO:0010605/GO:0005488/GO:0016773/GO:0010835/GO:0006259/GO:0051606/GO:0034645/GO:0006725/GO:0016776/GO:0050896/GO:0048522/GO:0036094/GO:0050794/GO:…	IBA/IEA/ISO	MF/CC/BP	PF08645/PF17913	Pnkp	G5E8N7/E9Q9A5		mmu:59047	ko:K08073
ENSMUSG00000002968	7.156367597	7.406664413	6.884545189	7.836118229	7.330614104	7.137013414	7.156145411	7.332263192	6.95508033	7.072403483	6.949112471	7.021588007	7.507677999	7.20105308	7.52206765	8.001663379	7.284172518	7.277214306	7.367726888	7.425047978	mediator complex subunit 25	GO:0005575/GO:0016922/GO:0009987/GO:0044237/GO:0005622/GO:0051254/GO:0005515/GO:0016592/GO:0044249/GO:0051253/GO:0044238/GO:1903508/GO:0090304/GO:0051252/GO:1903506/GO:0071840/GO:0006807/GO:0006366/GO:0016070/GO:0043170/GO:0009893/GO:0045944/GO:0043226/GO:0005488/GO:0045935/GO:0006725/GO:0071704/GO:0010628/GO:0010556/GO:0018130/GO:0080090/GO:0060255/GO:0044085/GO:0010468/GO:0010605/GO:2000112/GO:…	IBA/IPI/IGI/ISO/IEA	CC/MF/BP	PF11244/PF11265/PF11232/PF11235	Med25	A0A140LHG7/Q8VCB2		mmu:75613	ko:K15168
ENSMUSG00000002980	5.321203159	5.896164302	5.836966263	5.968234326	6.191183619	5.706712537	5.753803851	5.719474743	5.545551984	5.68269784	5.31886374	5.835791785	6.337392108	5.685439631	6.08454554	5.993460765	5.861458543	5.888566209	6.318854211	5.781487707	basal cell adhesion molecule	GO:0022610/GO:0098631/GO:0110165/GO:0009986/GO:0008150/GO:0031589/GO:0071944/GO:0031226/GO:0031224/GO:0003674/GO:0043236/GO:0050840/GO:0016021/GO:0008022/GO:0007160/GO:0007155/GO:0005575/GO:0005488/GO:0016020/GO:0009987/GO:0005887/GO:0005886/GO:0005055/GO:0005515	ISO/IDA/IEA/ISS	BP/MF/CC	PF08205/PF13895	Bcam	Q9R069		mmu:57278	ko:K06578
ENSMUSG00000002981	8.890533444	9.147438259	8.676646135	9.079906912	9.348406374	8.756330837	9.092777157	9.022430122	8.709981041	8.859933586	8.624620295	8.804235413	9.17704717	8.833730235	9.159340865	9.605290373	8.829448947	9.054229725	9.225924622	8.973448267	cleft lip and palate associated transmembrane protein 1	GO:0031224/GO:0042110/GO:0030154/GO:0032501/GO:0030098/GO:0032502/GO:0048856/GO:0009986/GO:0030217/GO:0002520/GO:0001775/GO:0005575/GO:0110165/GO:0002521/GO:0016020/GO:0048869/GO:0002682/GO:0003674/GO:0002694/GO:1902105/GO:0051249/GO:0033081/GO:0008150/GO:0050794/GO:0007275/GO:0030097/GO:0009897/GO:0046649/GO:0045321/GO:0002376/GO:0050863/GO:0033077/GO:0005886/GO:2000026/GO:0098552/GO:0009987/GO:…	IEA/IMP/IDA/ND	CC/BP/MF	PF05602	Clptm1	Q8VBZ3		mmu:56457
ENSMUSG00000002983	3.442730416	4.339833535	4.055770451	4.007553889	3.725940175	3.446109197	3.589167355	3.953179849	3.496115474	3.73346817	4.050326312	4.112384984	3.553681064	4.233356167	3.945217988	3.497960654	4.174722064	3.983262707	3.718135409	4.237235116	avian reticuloendotheliosis viral (v-rel) oncogene related B	GO:0044238/GO:0009889/GO:0051716/GO:2001141/GO:0051091/GO:0050794/GO:0009628/GO:0003700/GO:0043232/GO:0051254/GO:0002293/GO:0031326/GO:1901363/GO:0019222/GO:0003674/GO:0043227/GO:0034654/GO:0044271/GO:0065007/GO:0062197/GO:0044249/GO:0005575/GO:0006950/GO:0002292/GO:1902679/GO:0000981/GO:0009892/GO:0009059/GO:0043228/GO:0009890/GO:0006952/GO:0031327/GO:0032479/GO:2000113/GO:0002286/GO:0043229/GO:…	IMP/IDA/IBA/IEA/ISO/IPI	BP/MF/CC	PF16179/PF16180/PF16181/PF00554	Relb	Q04863/Q8K220	path:mmu04010/path:mmu04380/path:mmu04064/path:mmu05166/path:mmu04625/path:mmu05169	mmu:19698	ko:K09253	MAPK signaling pathway - Mus musculus (house mouse)/Osteoclast differentiation - Mus musculus (house mouse)/NF-kappa B signaling pathway - Mus musculus (house mouse)/Human T-cell leukemia virus 1 infection - Mus musculus (house mouse)/C-type lectin receptor signaling pathway - Mus musculus (house mouse)/Epstein-Barr virus infection - Mus musculus (house mouse)
ENSMUSG00000002984	7.500931188	7.746164215	7.510863822	7.37934979	8.024403325	7.551593702	7.929801897	7.606002418	7.522601106	7.632515586	7.202666487	7.283032278	7.761418375	7.466098492	7.823177891	8.179723575	7.616207958	7.589842212	8.055746153	7.50030019	translocase of outer mitochondrial membrane 40	GO:0015267/GO:0016020/GO:0015833/GO:0019867/GO:0005622/GO:0071705/GO:0016043/GO:0015288/GO:0005488/GO:0072657/GO:0005515/GO:0032991/GO:0005575/GO:0071840/GO:0016021/GO:0031307/GO:0043226/GO:0015075/GO:0031967/GO:0031975/GO:0031966/GO:0051641/GO:0006626/GO:0015318/GO:0090150/GO:0006605/GO:0019866/GO:0031968/GO:0043067/GO:0051234/GO:0032592/GO:0005742/GO:0006810/GO:0006886/GO:0022857/GO:0017038/GO:…	IEA/IDA/ISO/IBA/HDA	MF/CC/BP	PF01459	Tomm40	Q9QYA2	path:mmu05014/path:mmu05022	mmu:53333	ko:K11518	Amyotrophic lateral sclerosis - Mus musculus (house mouse)/Pathways of neurodegeneration - multiple diseases - Mus musculus (house mouse)
ENSMUSG00000002985	12.42625072	13.55636746	13.51955104	13.94184949	12.80766856	12.43696977	12.59607187	13.36679768	12.18249076	12.42110546	13.75179042	13.6218512	12.81428845	13.58096379	12.75748556	12.65425045	13.59741036	13.67627193	12.75731968	13.64026071	apolipoprotein E	GO:0030301/GO:0006629/GO:0043066/GO:0097061/GO:0045834/GO:0045833/GO:0055092/GO:0045807/GO:0030307/GO:0006638/GO:0097090/GO:0055090/GO:0045665/GO:0043523/GO:0097113/GO:0006639/GO:0097006/GO:0097062/GO:0065005/GO:0045732/GO:0000323/GO:0015485/GO:0006468/GO:0055089/GO:0055088/GO:0050789/GO:0043534/GO:0045773/GO:0045666/GO:0045664/GO:0065007/GO:0043085/GO:0043069/GO:0015630/GO:0048514/GO:0006518/GO:…	IDA/IBA/ISO/IGI/IMP/IPI	BP/CC/MF	PF01442	Apoe	P08226/Q3TXU4	path:mmu05010/path:mmu04979	mmu:11816	ko:K04524	Alzheimer disease - Mus musculus (house mouse)/Cholesterol metabolism - Mus musculus (house mouse)
ENSMUSG00000002996	4.078168495	4.604293815	4.366381418	4.573901905	4.056218336	4.078899874	4.429532805	4.49225956	4.208024883	4.417861541	4.543571625	4.378812255	4.078333818	4.878234956	4.448984074	4.196606929	4.869967023	4.652839622	4.098004195	4.466589278	high mobility group box transcription factor 1	GO:0140110/GO:0097659/GO:0018130/GO:0043226/GO:0110165/GO:0019438/GO:0006811/GO:0006810/GO:0005515/GO:0010743/GO:0097159/GO:0198738/GO:1901362/GO:0003677/GO:1901360/GO:0065007/GO:0005488/GO:0006812/GO:0019222/GO:0006807/GO:0006351/GO:0006366/GO:0044237/GO:0044249/GO:0005575/GO:0006357/GO:0003690/GO:0030154/GO:0060255/GO:0051716/GO:0006725/GO:0090304/GO:0016070/GO:0003676/GO:1905952/GO:0016607/GO:…	ISO/IEA/IDA/IPI/IC	MF/BP/CC	PF08517/PF00505	Hbp1	E9Q1A8/Q8R316/E9Q469		mmu:73389	ko:K21644
ENSMUSG00000002997	3.961416107	3.297288166	3.333258261	3.233283083	3.376489809	3.237967299	3.486286084	3.688029861	3.915636204	3.212286176	3.516911942	3.419639148	3.765330632	3.244650724	3.45736854	3.124040602	3.040200351	2.932439524	3.868196261	3.155650019	protein kinase cAMP dependent regulatory type II beta	GO:0019899/GO:0006807/GO:0044389/GO:0032559/GO:0098772/GO:0042325/GO:0032555/GO:0000166/GO:1901265/GO:0001932/GO:0045202/GO:0016740/GO:0032501/GO:0019538/GO:0045121/GO:0120025/GO:0005929/GO:0036477/GO:0005886/GO:0050794/GO:0019752/GO:0032553/GO:0071704/GO:0005829/GO:0032269/GO:0031324/GO:0019887/GO:0140096/GO:0008603/GO:0006796/GO:0032787/GO:0097539/GO:0006082/GO:0031399/GO:0043228/GO:0004860/GO:…	IDA/ISO/IEA/IMP/IPI/IBA	MF/BP/CC	PF02197/PF00027	Prkar2b	P31324	path:mmu04910	mmu:19088	ko:K04739	Insulin signaling pathway - Mus musculus (house mouse)
ENSMUSG00000003031	3.04001173	2.942809152	2.93960313	2.987069359	2.783951143	3.205195635	2.476180908	2.918734281	2.878064633	2.792289085	2.898913715	2.856376983	3.108212861	2.794639972	2.542779402	2.808462569	3.276247404	2.963818912	2.982831465	2.93256809	cyclin-dependent kinase inhibitor 1B	GO:0051726/GO:0006915/GO:0060255/GO:0016310/GO:0045930/GO:0045859/GO:0045892/GO:0045926/GO:2000026/GO:0006807/GO:0006914/GO:0043226/GO:0048731/GO:0048662/GO:2000241/GO:0045860/GO:0016740/GO:0006928/GO:0045786/GO:2000113/GO:0033673/GO:0045787/GO:0006813/GO:0016538/GO:0001558/GO:0006796/GO:0006812/GO:2000242/GO:0000280/GO:0051783/GO:0006810/GO:0006811/GO:0001654/GO:0019899/GO:2000112/GO:0060548/GO:…	IMP/ISO/IBA/IDA/IGI/IEA/IPI	BP/CC/MF	PF02234	Cdkn1b	P46414	path:mmu05200/path:mmu04066/path:mmu05215/path:mmu05222/path:mmu01522/path:mmu05169/path:mmu04068/path:mmu05162/path:mmu04933/path:mmu04012/path:mmu05203/path:mmu04934/path:mmu05165/path:mmu04151/path:mmu05226/path:mmu05220/path:mmu05206/path:mmu05202/path:mmu04110	mmu:12576	ko:K06624	Pathways in cancer - Mus musculus (house mouse)/HIF-1 signaling pathway - Mus musculus (house mouse)/Prostate cancer - Mus musculus (house mouse)/Small cell lung cancer - Mus musculus (house mouse)/Endocrine resistance - Mus musculus (house mouse)/Epstein-Barr virus infection - Mus musculus (house mouse)/FoxO signaling pathway - Mus musculus (house mouse)/Measles - Mus musculus (house mouse)/AGE-…
ENSMUSG00000003032	3.680629517	4.053240839	4.415684671	4.21439194	3.723021092	4.108579439	4.283821329	3.973778626	4.203423858	4.22474798	4.080553813	4.42387384	3.515860042	4.162913064	4.096227948	3.936890424	4.169020947	4.277789637	4.36059712	3.933891148	Kruppel-like factor 4 (gut)	GO:0043548/GO:0005719/GO:0006366/GO:0044271/GO:0051716/GO:0051898/GO:0048522/GO:0022008/GO:0032774/GO:0005667/GO:0034654/GO:0005737/GO:0043565/GO:0016477/GO:0050790/GO:0051674/GO:0005634/GO:0032682/GO:0032677/GO:0070587/GO:0001012/GO:0001067/GO:0048583/GO:0034645/GO:0051896/GO:0140297/GO:0051972/GO:0070570/GO:0044260/GO:0016301/GO:0051973/GO:0065007/GO:0000977/GO:0016070/GO:0051960/GO:0032602/GO:…	ISO/IDA/IMP/IGI/NAS/IBA/ISS/IEP/IPI/IEA	MF/CC/BP	PF00096	Klf4	Q60793/F2YID5	path:mmu04550/path:mmu05207	mmu:16600	ko:K17846	Signaling pathways regulating pluripotency of stem cells - Mus musculus (house mouse)/Chemical carcinogenesis - receptor activation - Mus musculus (house mouse)
ENSMUSG00000003033	6.656702461	6.641914534	6.667220678	6.918294864	6.986625196	6.903058188	6.918822966	6.685306469	6.890722205	6.928829735	6.320611847	6.73162591	6.953315606	6.750180057	6.872303314	6.847344324	6.598200911	6.843104482	6.922164423	6.560643321	adaptor-related protein complex AP-1 mu subunit 1	GO:0031982/GO:0035646/GO:0031984/GO:0051179/GO:0031410/GO:0030118/GO:0033036/GO:0030131/GO:0043226/GO:0043229/GO:0006810/GO:0005886/GO:0032502/GO:0032991/GO:0051234/GO:0030154/GO:0097708/GO:0071840/GO:0042886/GO:0046907/GO:0048757/GO:0043231/GO:0043227/GO:0005737/GO:0110165/GO:0032438/GO:0005575/GO:0048066/GO:0048475/GO:0071944/GO:0016020/GO:0030119/GO:0005802/GO:0033059/GO:0034613/GO:0043485/GO:…	IEA/ISO/TAS/IPI	CC/BP/MF	PF00928	Ap1m1	P35585/Q3UG16	path:mmu04142/path:mmu05170	mmu:11767	ko:K12393	Lysosome - Mus musculus (house mouse)/Human immunodeficiency virus 1 infection - Mus musculus (house mouse)
ENSMUSG00000003037	1.238575619	1.26572348	1.387599686	1.216838547	1.36166434	1.551774234	1.027329373	1.332418043	1.20837529	1.477798295	1.355194745	1.074032197	1.338102584	1.300512436	1.283663724	1.172429377	1.295264053	1.244949108	1.184022615	1.621915015	RAB8A member RAS oncogene family	GO:0012505/GO:0120025/GO:1901265/GO:0140352/GO:0005488/GO:0110165/GO:0140029/GO:0090087/GO:0061919/GO:0017111/GO:0043228/GO:0010970/GO:0099639/GO:0010033/GO:0005575/GO:0071944/GO:0016818/GO:0071840/GO:0035869/GO:0008152/GO:0061025/GO:0005515/GO:0009987/GO:0140056/GO:0120031/GO:0035556/GO:0120036/GO:0010243/GO:0017022/GO:0036477/GO:0072657/GO:0071375/GO:0010008/GO:0061512/GO:0035592/GO:0017076/GO:…	IDA/ISO/IBA/IEA/IPI	CC/MF/BP	PF00071	Rab8a	P55258/Q0PD50	path:mmu04972/path:mmu04152/path:mmu04140/path:mmu04530/path:mmu04144/path:mmu05014/path:mmu05022	mmu:17274	ko:K07901	Pancreatic secretion - Mus musculus (house mouse)/AMPK signaling pathway - Mus musculus (house mouse)/Autophagy - animal - Mus musculus (house mouse)/Tight junction - Mus musculus (house mouse)/Endocytosis - Mus musculus (house mouse)/Amyotrophic lateral sclerosis - Mus musculus (house mouse)/Pathways of neurodegeneration - multiple diseases - Mus musculus (house mouse)
ENSMUSG00000003038	1.226808014	1.135806895	1.377998409	1.163579871	1.498204375	1.269848348	1.266192381	1.311189363	1.146208736	1.164052649	1.72927248	1.54000373	1.081087178	1.372098147	1.161790414	1.4140711	1.111545393	1.762646158	1.352071735	1.338381438	high mobility group nucleosomal binding domain 2	GO:0009889/GO:0032502/GO:0006725/GO:0031327/GO:0050794/GO:0031324/GO:0009059/GO:0010468/GO:0034645/GO:0005575/GO:0009058/GO:0006366/GO:0009987/GO:0080090/GO:2000112/GO:0019222/GO:0031323/GO:0000122/GO:0010467/GO:0010558/GO:0050789/GO:0009890/GO:0006355/GO:0006357/GO:0032774/GO:0008150/GO:0090304/GO:0008152/GO:0016070/GO:0050793/GO:0010556/GO:0071704/GO:0060255/GO:0048519/GO:0045934/GO:0034654/GO:…	IMP/IGI/IDA	BP/CC	PF01101	Hmgn2	P09602/Q5BL14		mmu:15331	ko:K11300
ENSMUSG00000003039	6.176536408	6.05205891	6.309120944	6.250504087	6.492547575	6.460689916	6.074372721	6.288494076	6.037960729	5.944043156	6.342554928	6.303914103	6.195308553	6.532789793	6.363793077	6.271588109	6.492398486	6.132515131	6.17486597	5.959769151	family with sequence similarity 32 member A	GO:0005730/GO:0043227/GO:0005622/GO:0043226/GO:0043231/GO:0043233/GO:0005634/GO:0009987/GO:0031974/GO:0005575/GO:0008150/GO:0043228/GO:0110165/GO:0043232/GO:0043229/GO:0070013/GO:0031981/GO:0012501/GO:0006915/GO:0008219/GO:0007049	ISO/IBA/IEA/ND	CC/BP	PF08555	Fam32a	Q9CR80		mmu:67922	ko:K13120
ENSMUSG00000003062	5.627372767	5.508012325	5.89805164	5.813555341	5.510570379	5.665314532	5.570598411	5.498846189	5.664798265	5.452263742	5.855668198	6.13430367	5.377983828	5.926689388	5.503284284	5.697290972	5.994126612	5.649069191	5.61751234	5.449866635	STARD3 N-terminal like	GO:0097159/GO:0010008/GO:0016021/GO:0008289/GO:0016020/GO:0097708/GO:0071944/GO:0012505/GO:0008150/GO:0110165/GO:0009987/GO:0006810/GO:0098805/GO:0003674/GO:0046983/GO:0099022/GO:0015485/GO:0098588/GO:0005488/GO:0006903/GO:0005622/GO:0005515/GO:0043226/GO:0051649/GO:0005737/GO:0099044/GO:0016192/GO:0016043/GO:0043231/GO:0051179/GO:0042803/GO:0051640/GO:0005789/GO:0043227/GO:0051641/GO:0005886/GO:…	ISO/IEA	MF/CC/BP	PF10457	Stard3nl	Q9DCI3/A0A0G2JE93		mmu:76205
ENSMUSG00000003068	6.790381591	6.970407907	6.558325083	6.782621894	7.030907993	6.847856777	6.77291865	6.801294868	6.798281605	6.692822505	6.611073746	6.593862798	6.864131317	6.584516339	7.050074062	6.857000108	6.815053139	6.792095707	6.990527339	6.520785019	serine/threonine kinase 11	GO:0051640/GO:0003674/GO:0030178/GO:0002757/GO:0016055/GO:0030182/GO:0030154/GO:0006796/GO:0048519/GO:0036211/GO:0030295/GO:0030111/GO:0120039/GO:0000003/GO:0051338/GO:0140096/GO:0051347/GO:0048518/GO:0031344/GO:0030275/GO:0016049/GO:0000166/GO:0048522/GO:0031399/GO:0051716/GO:0007154/GO:0060770/GO:0010224/GO:0048812/GO:0030097/GO:0030098/GO:0043233/GO:0002684/GO:0002682/GO:0010562/GO:0002764/GO:…	IMP/ISS/IGI/ISO/IEA/IDA/IPI	BP/MF/CC	PF00069	Stk11	Q3V4A1/Q9WTK7	path:mmu04068/path:mmu04140/path:mmu04530/path:mmu04150/path:mmu04151/path:mmu04920/path:mmu04211/path:mmu04152	mmu:20869	ko:K07298	FoxO signaling pathway - Mus musculus (house mouse)/Autophagy - animal - Mus musculus (house mouse)/Tight junction - Mus musculus (house mouse)/mTOR signaling pathway - Mus musculus (house mouse)/PI3K-Akt signaling pathway - Mus musculus (house mouse)/Adipocytokine signaling pathway - Mus musculus (house mouse)/Longevity regulating pathway - Mus musculus (house mouse)/AMPK signaling pathway - Mus…
ENSMUSG00000003070	4.61775847	4.117391434	3.871049915	4.152566816	4.367186247	4.307164788	4.36916822	4.413567394	4.646508235	4.447538468	4.209955119	3.831071673	4.33933882	3.696323602	4.492565461	4.160047906	4.090562701	4.047686221	4.411880923	3.949776856	ephrin A2	GO:0032989/GO:0071840/GO:0007165/GO:0042221/GO:0030099/GO:0048667/GO:0007166/GO:0032990/GO:0040011/GO:0005515/GO:0031594/GO:0005575/GO:0007154/GO:0023052/GO:0031224/GO:0031225/GO:0030030/GO:0030154/GO:0110165/GO:0005488/GO:0000902/GO:0036477/GO:0030182/GO:0030054/GO:0048699/GO:0031175/GO:0048869/GO:0022008/GO:0002521/GO:0048513/GO:0032502/GO:0050896/GO:0006928/GO:0005886/GO:0030097/GO:0046875/GO:…	IBA/ISO/IEA/IDA/IPI	BP/MF/CC	PF00812	Efna2	P52801/Q3USB4	path:mmu04014/path:mmu04015/path:mmu05206/path:mmu04360/path:mmu04010/path:mmu04151	mmu:13637	ko:K05462	Ras signaling pathway - Mus musculus (house mouse)/Rap1 signaling pathway - Mus musculus (house mouse)/MicroRNAs in cancer - Mus musculus (house mouse)/Axon guidance - Mus musculus (house mouse)/MAPK signaling pathway - Mus musculus (house mouse)/PI3K-Akt signaling pathway - Mus musculus (house mouse)
ENSMUSG00000003072	10.0937209	10.21934394	9.646806091	9.953934013	10.59057996	9.996307766	10.3611584	10.06688433	9.941614084	10.09080133	9.730473739	9.829409288	10.47128101	9.9516764	10.56373725	10.3689345	9.83398099	10.03939748	10.41625706	9.932200191	ATP synthase H+ transporting mitochondrial F1 complex delta subunit	GO:0006139/GO:0015318/GO:0005740/GO:0005737/GO:0015672/GO:0009141/GO:0034220/GO:0009144/GO:0044237/GO:0009142/GO:0005739/GO:0043229/GO:0072522/GO:0017144/GO:0005743/GO:0006163/GO:0005575/GO:0005753/GO:0016887/GO:0015252/GO:1901576/GO:0090407/GO:0015267/GO:0043226/GO:0072521/GO:0003824/GO:0006091/GO:0016787/GO:0016776/GO:1901135/GO:0015980/GO:0044085/GO:1901137/GO:0071704/GO:0017111/GO:0016469/GO:…	IBA/ISO/IEA/HDA	BP/MF/CC	PF02823	Atp5d	D3Z7S4/Q4FK74/Q9D3D9	path:mmu05022/path:mmu05010/path:mmu01100/path:mmu04714/path:mmu00190/path:mmu05016/path:mmu05020/path:mmu05014/path:mmu05208/path:mmu05415/path:mmu05012	mmu:66043	ko:K02134	Pathways of neurodegeneration - multiple diseases - Mus musculus (house mouse)/Alzheimer disease - Mus musculus (house mouse)/Metabolic pathways - Mus musculus (house mouse)/Thermogenesis - Mus musculus (house mouse)/Oxidative phosphorylation - Mus musculus (house mouse)/Huntington disease - Mus musculus (house mouse)/Prion disease - Mus musculus (house mouse)/Amyotrophic lateral sclerosis - Mus …
ENSMUSG00000003099	7.698678119	7.736959312	7.529831816	7.583492055	7.867639046	7.722981068	7.687627517	7.996066455	7.623149809	7.537031083	7.25645442	7.81364425	7.874855891	7.437722483	8.181416034	8.138173533	7.604287858	7.627222126	8.005142667	7.293067464	protein phosphatase 5 catalytic subunit	GO:0003824/GO:0030554/GO:0010038/GO:0004721/GO:0016788/GO:0051291/GO:0031072/GO:0042578/GO:0005575/GO:0003723/GO:1901700/GO:0008152/GO:0008219/GO:0010035/GO:0050896/GO:0016576/GO:0110165/GO:0043170/GO:0042325/GO:0016791/GO:0010563/GO:0051879/GO:0042326/GO:0051716/GO:0042493/GO:0043204/GO:0050794/GO:0008150/GO:0032268/GO:0030522/GO:0010605/GO:0043168/GO:0009719/GO:0010243/GO:0010033/GO:0043226/GO:…	IBA/ISO/IMP/IEA/IDA/IPI	MF/BP/CC	PF00149/PF08321/PF00515	Ppp5c	Q60676	path:mmu04010	mmu:19060	ko:K04460	MAPK signaling pathway - Mus musculus (house mouse)
ENSMUSG00000003119	2.095047089	2.145196764	2.339713646	2.06697656	2.075426857	2.497865725	2.184304728	2.127027797	2.448831081	2.381564647	2.205134795	2.191092898	2.065681322	2.014650741	2.063760499	1.968150162	1.944378498	1.805261677	2.16746083	2.059009173	cyclin-dependent kinase 12	GO:0048522/GO:0006468/GO:0097472/GO:0019222/GO:0019220/GO:0006725/GO:0006355/GO:0019438/GO:2001141/GO:0006357/GO:0006396/GO:0048519/GO:0090304/GO:0097159/GO:0006366/GO:0046777/GO:0050790/GO:0048518/GO:0097367/GO:0018130/GO:0009889/GO:0016773/GO:0050789/GO:0048583/GO:0048523/GO:0006464/GO:0045595/GO:0009058/GO:0008353/GO:0032268/GO:0032502/GO:0019538/GO:0048863/GO:0003824/GO:0097659/GO:0044271/GO:…	IBA/ISO/IMP/IEA/IDA	BP/MF/CC	PF00069	Cdk12	Q14AX6		mmu:69131	ko:K08819
ENSMUSG00000003123	4.390642355	4.908179028	4.182759381	4.847981781	4.76398608	4.987351951	4.909876794	4.489251796	4.729749547	4.227793096	4.756767205	5.103114917	4.773598049	4.877521441	4.538074027	5.656963061	4.748931747	4.400201872	4.731103623	4.73542269	lipase hormone sensitive	GO:0009056/GO:0005886/GO:0009059/GO:0044249/GO:0005901/GO:0006066/GO:0110165/GO:0044853/GO:0009062/GO:0005811/GO:0003824/GO:0044242/GO:0005829/GO:1901363/GO:0009058/GO:0098857/GO:0044248/GO:1902652/GO:0044238/GO:0004806/GO:0016787/GO:0008152/GO:0008150/GO:0045121/GO:0008202/GO:0016020/GO:0098805/GO:0043226/GO:0005575/GO:0009987/GO:1901615/GO:1901360/GO:0016298/GO:0034641/GO:0090304/GO:0006807/GO:…	IDA/ISS/IMP/IEA/ISO/IPI	BP/CC/MF	PF06350/PF07859	Lipe	P54310	path:mmu04024/path:mmu04152/path:mmu04925/path:mmu04714/path:mmu04371/path:mmu04910/path:mmu04923	mmu:16890	ko:K07188	cAMP signaling pathway - Mus musculus (house mouse)/AMPK signaling pathway - Mus musculus (house mouse)/Aldosterone synthesis and secretion - Mus musculus (house mouse)/Thermogenesis - Mus musculus (house mouse)/Apelin signaling pathway - Mus musculus (house mouse)/Insulin signaling pathway - Mus musculus (house mouse)/Regulation of lipolysis in adipocytes - Mus musculus (house mouse)
ENSMUSG00000003131	2.441276852	2.047049301	2.618602649	2.108111127	1.912356208	2.558510331	2.341049127	2.251203595	1.962771004	2.403499015	2.059846245	2.874492887	2.056050681	2.350613406	2.363276304	2.170957872	2.279303749	1.957354483	2.318150274	2.210604663	platelet-activating factor acetylhydrolase isoform 1b subunit 2	GO:0005575/GO:0042803/GO:0043228/GO:0031981/GO:0043232/GO:0042802/GO:0043229/GO:0005515/GO:0043231/GO:0043233/GO:0032502/GO:0032504/GO:0044237/GO:0003006/GO:0048609/GO:0009056/GO:0065007/GO:0003674/GO:0008150/GO:0005488/GO:0043226/GO:0019953/GO:0022414/GO:0032501/GO:0048731/GO:0048856/GO:0003824/GO:0008152/GO:0031331/GO:0048518/GO:0044703/GO:0006914/GO:0061919/GO:0009987/GO:0016740/GO:0000003/GO:…	IDA/ISO/IBA/IMP/IGI/IEA/IPI	CC/MF/BP	PF13472	Pafah1b2	Q61206	path:mmu01100/path:mmu00565	mmu:18475	ko:K16795	Metabolic pathways - Mus musculus (house mouse)/Ether lipid metabolism - Mus musculus (house mouse)
ENSMUSG00000003134	2.987374366	2.789585136	3.195954858	2.881225935	2.746945166	3.059218647	2.990761034	2.943718257	2.817881198	2.682480329	3.12430799	3.002184393	2.767795762	3.269016277	2.690312867	2.94642394	3.242997918	2.989198723	2.877182734	2.832888703	TBC1 domain family member 8	GO:0005515/GO:0017111/GO:0050790/GO:0043547/GO:0005096/GO:0044093/GO:0006810/GO:0008104/GO:0046907/GO:0005488/GO:0090630/GO:0043087/GO:0019899/GO:0017016/GO:0098772/GO:0030695/GO:0051179/GO:0033036/GO:0008047/GO:0045184/GO:0017137/GO:0031267/GO:0030234/GO:0042886/GO:0003924/GO:0034613/GO:0003674/GO:0043085/GO:0071702/GO:0015833/GO:0051336/GO:0006886/GO:0071705/GO:0003824/GO:0015031/GO:0065009/GO:…	IBA	MF/BP	PF02893/PF00566	Tbc1d8	Q9Z1A9		mmu:54610	ko:K19951
ENSMUSG00000003135	4.748267832	4.454636297	4.737673427	4.821838643	5.023551841	4.921080214	4.813748533	4.76846022	4.848696663	4.641350463	4.884029924	4.763338145	4.796563469	4.862602781	4.879170328	4.923052254	4.767701311	4.681552906	4.451646052	4.597083919	CCR4-NOT transcription complex subunit 11	GO:0048519/GO:0051171/GO:0005622/GO:2000112/GO:0110165/GO:0009987/GO:0010556/GO:0009059/GO:0008152/GO:0080090/GO:0005737/GO:0010605/GO:1901576/GO:0010467/GO:1901564/GO:0030014/GO:0009892/GO:0065007/GO:0006412/GO:0009889/GO:0010629/GO:0010468/GO:0003674/GO:0051246/GO:0060255/GO:0032268/GO:0016458/GO:0031326/GO:0044249/GO:0031323/GO:0006417/GO:0071704/GO:0034641/GO:0044237/GO:0043603/GO:0031047/GO:…	IEA/ISO/ND	BP/CC/MF	PF10155	Cnot11	Q9CWN7		mmu:52846
ENSMUSG00000003153	6.283928682	6.117497862	6.063263161	5.65925965	6.417670803	6.279211643	6.400850178	6.466012553	6.089132418	6.381472814	5.771288538	6.075683664	6.344098984	5.928765436	6.290081045	5.977015315	5.98081869	5.910140859	6.242672974	5.796980923	solute carrier family 2 (facilitated glucose transporter) member 3	GO:0005886/GO:0099240/GO:0005575/GO:0098978/GO:0099501/GO:0098793/GO:0071702/GO:0005773/GO:0098805/GO:0019900/GO:0005215/GO:0019899/GO:0005737/GO:0005622/GO:0005887/GO:0005355/GO:0099503/GO:0071944/GO:0097708/GO:0008150/GO:0015149/GO:0090482/GO:1904659/GO:0045202/GO:0098588/GO:0015749/GO:0005515/GO:0098857/GO:0006811/GO:0110165/GO:0016020/GO:0030667/GO:0044853/GO:0006810/GO:0043231/GO:0031410/GO:…	ISO/IMP/IDA/IEA	CC/BP/MF	PF00083	Slc2a3	Q3TPL8/P32037/Q8BLF7		mmu:20527	ko:K08142
ENSMUSG00000003154	3.377810335	3.429851815	3.466390243	3.808224689	3.50624543	3.693772104	3.449705307	3.275519782	3.30807225	3.800109559	3.223986758	3.689119338	3.080792518	3.644939458	3.498054383	3.794702723	3.548071177	3.631742718	3.428649793	3.999782051	forkhead box J2	GO:0032501/GO:0051254/GO:0043170/GO:0032774/GO:0031328/GO:0060837/GO:0031981/GO:0001650/GO:0051252/GO:0097659/GO:0048731/GO:0009987/GO:0097159/GO:0009653/GO:0018130/GO:0034645/GO:0019219/GO:0001525/GO:0008150/GO:0048646/GO:1903506/GO:0048523/GO:0001228/GO:0034654/GO:0048661/GO:1990837/GO:0009891/GO:2000112/GO:0009889/GO:0048659/GO:0048518/GO:0048856/GO:0048660/GO:0031323/GO:0048519/GO:2001141/GO:…	ISO/IBA/IEA	BP/CC/MF	PF00250	Foxj2	Q9ES18		mmu:60611	ko:K09403
ENSMUSG00000003161	7.142565014	7.444319748	7.433161168	7.551630848	7.053889149	7.375521754	7.178400995	7.308465402	7.201238217	7.284693195	7.505339992	7.34080023	7.185739747	7.552469801	7.375431027	7.225565329	7.532781976	7.293411022	6.798522312	7.441831025	sorcin	GO:0043269/GO:0055080/GO:0003013/GO:0098660/GO:0009058/GO:0043231/GO:0051252/GO:0015833/GO:0150034/GO:0051279/GO:0006816/GO:0055065/GO:0003008/GO:0090276/GO:0090304/GO:0003674/GO:0006812/GO:0043233/GO:0090277/GO:0003012/GO:0034765/GO:0010959/GO:0110165/GO:0010647/GO:0120025/GO:0098588/GO:0034762/GO:0043270/GO:0012505/GO:0097553/GO:0010649/GO:0048878/GO:0034763/GO:0010648/GO:0034764/GO:0001678/GO:…	IMP/ISO/IPI/IEA/IDA	BP/CC/MF	PF13405	Sri	Q6P069		mmu:109552	ko:K23924
ENSMUSG00000003166	6.69762241	6.679684054	6.413206511	6.60651864	6.640604357	6.332358419	6.508360352	6.814616528	6.306993853	6.881620034	6.282389558	6.480358641	6.819018177	6.052135889	6.29853807	6.735740272	6.402666822	6.612324438	6.846760204	6.327889797	DiGeorge syndrome critical region gene 2	GO:0110165/GO:0016020/GO:0016021/GO:0030246/GO:0009987/GO:0042221/GO:0031224/GO:0008150/GO:0005575/GO:0022610/GO:0005488/GO:0003008/GO:0050896/GO:0050877/GO:0042493/GO:0032501/GO:0050890/GO:0007155/GO:0003674	IDA/IEA/ISO	CC/MF/BP	PF00059/PF00057	Dgcr2	Q6P5A9/A0A0R4J1M6/P98154		mmu:13356
[truncated: 14,931 more rows]
