# Supplementary material for: CD4 T-cell aging exacerbates neuroinflammation in a late-onset mouse model of amyotrophic lateral sclerosis
Source: J Neuroinflammation. 2024 Jan 11;21:17. doi: 10.1186/s12974-023-03007-1 (PMC10782641; doi:10.1186/s12974-023-03007-1)
Supplement: Supplementary file 6 — Additional file 6: Table S5. Upregulated Immune-related GO biological processes in lumbar spinal cords of SOD1G37R mice. The table outlines the GO biological processes found to be upregulated in lumbar SC samples, as ascertained through bulk RNA-seq analysis. Columns from left to right present the biological process name, gene ratio, and p.adjust. [file 12974_2023_3007_MOESM6_ESM.csv]

	Cluster	ID	Description	GeneRatio	BgRatio	pvalue	p.adjust	qvalue	geneID	Count
1	Down	GO:0006810	transport	593/1598	4615/21087	2.03E-47	1.60E-43	1.36E-43	ENSMUSG00000066392/ENSMUSG00000017737/ENSMUSG00000020891/ENSMUSG00000042429/ENSMUSG00000047507/ENSMUSG00000021684/ENSMUSG00000027895/ENSMUSG00000050148/ENSMUSG00000021708/ENSMUSG00000023064/ENSMUSG00000027223/ENSMUSG00000072214/ENSMUSG00000027584/ENSMUSG00000031748/ENSMUSG00000022619/ENSMUSG00000028542/ENSMUSG00000017897/ENSMUSG00000034997/ENSMUSG00000048895/ENSMUSG00000026797/ENSMUSG00000037012/…	593
2	Down	GO:0051179	localization	719/1598	6094/21087	5.16E-46	2.03E-42	1.74E-42	ENSMUSG00000066392/ENSMUSG00000017737/ENSMUSG00000032336/ENSMUSG00000020891/ENSMUSG00000036585/ENSMUSG00000024277/ENSMUSG00000042429/ENSMUSG00000047507/ENSMUSG00000021684/ENSMUSG00000027895/ENSMUSG00000050148/ENSMUSG00000021708/ENSMUSG00000025407/ENSMUSG00000023064/ENSMUSG00000035953/ENSMUSG00000027223/ENSMUSG00000072214/ENSMUSG00000027584/ENSMUSG00000031748/ENSMUSG00000022619/ENSMUSG00000028542/…	719
3	Down	GO:0051234	establishment of localization	599/1598	4747/21087	2.53E-45	6.64E-42	5.68E-42	ENSMUSG00000066392/ENSMUSG00000017737/ENSMUSG00000020891/ENSMUSG00000042429/ENSMUSG00000047507/ENSMUSG00000021684/ENSMUSG00000027895/ENSMUSG00000050148/ENSMUSG00000021708/ENSMUSG00000023064/ENSMUSG00000027223/ENSMUSG00000072214/ENSMUSG00000027584/ENSMUSG00000031748/ENSMUSG00000022619/ENSMUSG00000028542/ENSMUSG00000017897/ENSMUSG00000034997/ENSMUSG00000048895/ENSMUSG00000026797/ENSMUSG00000037012/…	599
4	Down	GO:0099536	synaptic signaling	204/1598	961/21087	1.66E-43	3.27E-40	2.80E-40	ENSMUSG00000066392/ENSMUSG00000017737/ENSMUSG00000032336/ENSMUSG00000042429/ENSMUSG00000047507/ENSMUSG00000024524/ENSMUSG00000033208/ENSMUSG00000027895/ENSMUSG00000021708/ENSMUSG00000023064/ENSMUSG00000072214/ENSMUSG00000031748/ENSMUSG00000028546/ENSMUSG00000022619/ENSMUSG00000028542/ENSMUSG00000034997/ENSMUSG00000048895/ENSMUSG00000026797/ENSMUSG00000030209/ENSMUSG00000019146/ENSMUSG00000026825/…	204
5	Down	GO:0007268	chemical synaptic transmission	200/1598	935/21087	3.72E-43	4.89E-40	4.18E-40	ENSMUSG00000066392/ENSMUSG00000017737/ENSMUSG00000032336/ENSMUSG00000042429/ENSMUSG00000047507/ENSMUSG00000024524/ENSMUSG00000033208/ENSMUSG00000027895/ENSMUSG00000021708/ENSMUSG00000023064/ENSMUSG00000072214/ENSMUSG00000031748/ENSMUSG00000028546/ENSMUSG00000022619/ENSMUSG00000028542/ENSMUSG00000034997/ENSMUSG00000026797/ENSMUSG00000030209/ENSMUSG00000019146/ENSMUSG00000026825/ENSMUSG00000057897/…	200
6	Down	GO:0098916	anterograde trans-synaptic signaling	200/1598	935/21087	3.72E-43	4.89E-40	4.18E-40	ENSMUSG00000066392/ENSMUSG00000017737/ENSMUSG00000032336/ENSMUSG00000042429/ENSMUSG00000047507/ENSMUSG00000024524/ENSMUSG00000033208/ENSMUSG00000027895/ENSMUSG00000021708/ENSMUSG00000023064/ENSMUSG00000072214/ENSMUSG00000031748/ENSMUSG00000028546/ENSMUSG00000022619/ENSMUSG00000028542/ENSMUSG00000034997/ENSMUSG00000026797/ENSMUSG00000030209/ENSMUSG00000019146/ENSMUSG00000026825/ENSMUSG00000057897/…	200
7	Down	GO:0099537	trans-synaptic signaling	200/1598	944/21087	1.69E-42	1.90E-39	1.62E-39	ENSMUSG00000066392/ENSMUSG00000017737/ENSMUSG00000032336/ENSMUSG00000042429/ENSMUSG00000047507/ENSMUSG00000024524/ENSMUSG00000033208/ENSMUSG00000027895/ENSMUSG00000021708/ENSMUSG00000023064/ENSMUSG00000072214/ENSMUSG00000031748/ENSMUSG00000028546/ENSMUSG00000022619/ENSMUSG00000028542/ENSMUSG00000034997/ENSMUSG00000026797/ENSMUSG00000030209/ENSMUSG00000019146/ENSMUSG00000026825/ENSMUSG00000057897/…	200
8	Down	GO:0007399	nervous system development	343/1598	2352/21087	1.78E-35	1.75E-32	1.50E-32	ENSMUSG00000066392/ENSMUSG00000020099/ENSMUSG00000032336/ENSMUSG00000033208/ENSMUSG00000025407/ENSMUSG00000028546/ENSMUSG00000022619/ENSMUSG00000050132/ENSMUSG00000048895/ENSMUSG00000026797/ENSMUSG00000019428/ENSMUSG00000057897/ENSMUSG00000020366/ENSMUSG00000003575/ENSMUSG00000041670/ENSMUSG00000005045/ENSMUSG00000060780/ENSMUSG00000059146/ENSMUSG00000032537/ENSMUSG00000006435/ENSMUSG00000031840/…	343
9	Down	GO:0031175	neuron projection development	205/1598	1097/21087	3.79E-35	3.31E-32	2.83E-32	ENSMUSG00000020099/ENSMUSG00000032336/ENSMUSG00000028546/ENSMUSG00000022619/ENSMUSG00000050132/ENSMUSG00000048895/ENSMUSG00000026797/ENSMUSG00000057897/ENSMUSG00000020366/ENSMUSG00000003575/ENSMUSG00000041670/ENSMUSG00000059146/ENSMUSG00000032537/ENSMUSG00000006435/ENSMUSG00000031840/ENSMUSG00000059981/ENSMUSG00000024777/ENSMUSG00000035863/ENSMUSG00000020886/ENSMUSG00000022812/ENSMUSG00000030731/…	205
10	Down	GO:0048666	neuron development	219/1598	1238/21087	6.67E-34	5.25E-31	4.49E-31	ENSMUSG00000020099/ENSMUSG00000032336/ENSMUSG00000028546/ENSMUSG00000022619/ENSMUSG00000050132/ENSMUSG00000048895/ENSMUSG00000026797/ENSMUSG00000057897/ENSMUSG00000020366/ENSMUSG00000003575/ENSMUSG00000041670/ENSMUSG00000059146/ENSMUSG00000032537/ENSMUSG00000006435/ENSMUSG00000031840/ENSMUSG00000059981/ENSMUSG00000024777/ENSMUSG00000035863/ENSMUSG00000020886/ENSMUSG00000022812/ENSMUSG00000030731/…	219
11	Down	GO:0051641	cellular localization	389/1598	2866/21087	1.29E-33	9.24E-31	7.90E-31	ENSMUSG00000066392/ENSMUSG00000024277/ENSMUSG00000042429/ENSMUSG00000047507/ENSMUSG00000021684/ENSMUSG00000027895/ENSMUSG00000023064/ENSMUSG00000035953/ENSMUSG00000072214/ENSMUSG00000028542/ENSMUSG00000034997/ENSMUSG00000048895/ENSMUSG00000026797/ENSMUSG00000037012/ENSMUSG00000030209/ENSMUSG00000019146/ENSMUSG00000026825/ENSMUSG00000057897/ENSMUSG00000042249/ENSMUSG00000020734/ENSMUSG00000021816/…	389
12	Down	GO:0006811	ion transport	267/1598	1675/21087	1.63E-33	1.07E-30	9.17E-31	ENSMUSG00000017737/ENSMUSG00000042429/ENSMUSG00000027895/ENSMUSG00000021708/ENSMUSG00000023064/ENSMUSG00000027584/ENSMUSG00000031748/ENSMUSG00000022619/ENSMUSG00000028542/ENSMUSG00000034997/ENSMUSG00000026797/ENSMUSG00000037012/ENSMUSG00000030209/ENSMUSG00000019146/ENSMUSG00000057897/ENSMUSG00000020734/ENSMUSG00000029167/ENSMUSG00000058441/ENSMUSG00000020366/ENSMUSG00000019997/ENSMUSG00000023017/…	267
13	Down	GO:0030182	neuron differentiation	247/1598	1508/21087	8.68E-33	5.26E-30	4.50E-30	ENSMUSG00000020099/ENSMUSG00000032336/ENSMUSG00000028546/ENSMUSG00000022619/ENSMUSG00000050132/ENSMUSG00000048895/ENSMUSG00000026797/ENSMUSG00000057897/ENSMUSG00000020366/ENSMUSG00000003575/ENSMUSG00000041670/ENSMUSG00000005045/ENSMUSG00000059146/ENSMUSG00000032537/ENSMUSG00000006435/ENSMUSG00000031840/ENSMUSG00000059981/ENSMUSG00000024777/ENSMUSG00000035863/ENSMUSG00000020886/ENSMUSG00000022812/…	247
14	Down	GO:0048699	generation of neurons	264/1598	1688/21087	1.01E-31	5.71E-29	4.88E-29	ENSMUSG00000020099/ENSMUSG00000032336/ENSMUSG00000028546/ENSMUSG00000022619/ENSMUSG00000050132/ENSMUSG00000048895/ENSMUSG00000026797/ENSMUSG00000057897/ENSMUSG00000020366/ENSMUSG00000003575/ENSMUSG00000041670/ENSMUSG00000005045/ENSMUSG00000059146/ENSMUSG00000032537/ENSMUSG00000006435/ENSMUSG00000031840/ENSMUSG00000059981/ENSMUSG00000024777/ENSMUSG00000035863/ENSMUSG00000020886/ENSMUSG00000022812/…	264
15	Down	GO:0022008	neurogenesis	274/1598	1794/21087	3.29E-31	1.73E-28	1.48E-28	ENSMUSG00000020099/ENSMUSG00000032336/ENSMUSG00000028546/ENSMUSG00000022619/ENSMUSG00000050132/ENSMUSG00000048895/ENSMUSG00000026797/ENSMUSG00000057897/ENSMUSG00000020366/ENSMUSG00000003575/ENSMUSG00000041670/ENSMUSG00000005045/ENSMUSG00000059146/ENSMUSG00000032537/ENSMUSG00000006435/ENSMUSG00000031840/ENSMUSG00000059981/ENSMUSG00000024777/ENSMUSG00000035863/ENSMUSG00000020886/ENSMUSG00000022812/…	274
16	Down	GO:0016043	cellular component organization	697/1598	6425/21087	5.60E-31	2.76E-28	2.36E-28	ENSMUSG00000066392/ENSMUSG00000017737/ENSMUSG00000020099/ENSMUSG00000032336/ENSMUSG00000024277/ENSMUSG00000047507/ENSMUSG00000027895/ENSMUSG00000050148/ENSMUSG00000023064/ENSMUSG00000035953/ENSMUSG00000072214/ENSMUSG00000028546/ENSMUSG00000022619/ENSMUSG00000017897/ENSMUSG00000050132/ENSMUSG00000034997/ENSMUSG00000048895/ENSMUSG00000000296/ENSMUSG00000026797/ENSMUSG00000030209/ENSMUSG00000019146/…	697
17	Down	GO:0007267	cell-cell signaling	285/1598	1910/21087	9.32E-31	4.32E-28	3.69E-28	ENSMUSG00000066392/ENSMUSG00000017737/ENSMUSG00000032336/ENSMUSG00000020891/ENSMUSG00000036585/ENSMUSG00000042429/ENSMUSG00000047507/ENSMUSG00000024524/ENSMUSG00000033208/ENSMUSG00000021684/ENSMUSG00000027895/ENSMUSG00000021708/ENSMUSG00000025407/ENSMUSG00000023064/ENSMUSG00000072214/ENSMUSG00000031748/ENSMUSG00000028546/ENSMUSG00000022619/ENSMUSG00000028542/ENSMUSG00000034997/ENSMUSG00000048895/…	285
18	Down	GO:0050804	modulation of chemical synaptic transmission	142/1598	666/21087	1.93E-30	8.46E-28	7.23E-28	ENSMUSG00000066392/ENSMUSG00000017737/ENSMUSG00000032336/ENSMUSG00000042429/ENSMUSG00000047507/ENSMUSG00000033208/ENSMUSG00000027895/ENSMUSG00000021708/ENSMUSG00000023064/ENSMUSG00000072214/ENSMUSG00000028546/ENSMUSG00000022619/ENSMUSG00000028542/ENSMUSG00000034997/ENSMUSG00000026797/ENSMUSG00000030209/ENSMUSG00000019146/ENSMUSG00000026825/ENSMUSG00000057897/ENSMUSG00000003657/ENSMUSG00000020734/…	142
19	Down	GO:0099177	regulation of trans-synaptic signaling	142/1598	667/21087	2.28E-30	9.46E-28	8.09E-28	ENSMUSG00000066392/ENSMUSG00000017737/ENSMUSG00000032336/ENSMUSG00000042429/ENSMUSG00000047507/ENSMUSG00000033208/ENSMUSG00000027895/ENSMUSG00000021708/ENSMUSG00000023064/ENSMUSG00000072214/ENSMUSG00000028546/ENSMUSG00000022619/ENSMUSG00000028542/ENSMUSG00000034997/ENSMUSG00000026797/ENSMUSG00000030209/ENSMUSG00000019146/ENSMUSG00000026825/ENSMUSG00000057897/ENSMUSG00000003657/ENSMUSG00000020734/…	142
20	Down	GO:0099003	vesicle-mediated transport in synapse	80/1598	250/21087	7.38E-30	2.91E-27	2.48E-27	ENSMUSG00000066392/ENSMUSG00000072214/ENSMUSG00000034997/ENSMUSG00000048895/ENSMUSG00000026797/ENSMUSG00000026825/ENSMUSG00000021816/ENSMUSG00000041670/ENSMUSG00000031840/ENSMUSG00000027577/ENSMUSG00000039953/ENSMUSG00000022812/ENSMUSG00000024743/ENSMUSG00000035390/ENSMUSG00000011877/ENSMUSG00000025855/ENSMUSG00000024127/ENSMUSG00000030098/ENSMUSG00000033615/ENSMUSG00000031144/ENSMUSG00000040722/…	80
21	Down	GO:0006812	cation transport	205/1598	1199/21087	1.30E-29	4.86E-27	4.15E-27	ENSMUSG00000017737/ENSMUSG00000042429/ENSMUSG00000027895/ENSMUSG00000021708/ENSMUSG00000023064/ENSMUSG00000027584/ENSMUSG00000031748/ENSMUSG00000022619/ENSMUSG00000028542/ENSMUSG00000034997/ENSMUSG00000030209/ENSMUSG00000019146/ENSMUSG00000057897/ENSMUSG00000020734/ENSMUSG00000029167/ENSMUSG00000058441/ENSMUSG00000019997/ENSMUSG00000023017/ENSMUSG00000027577/ENSMUSG00000020886/ENSMUSG00000030731/…	205
22	Down	GO:0071840	cellular component organization or biogenesis	705/1598	6594/21087	2.18E-29	7.82E-27	6.69E-27	ENSMUSG00000066392/ENSMUSG00000017737/ENSMUSG00000020099/ENSMUSG00000032336/ENSMUSG00000024277/ENSMUSG00000047507/ENSMUSG00000027895/ENSMUSG00000050148/ENSMUSG00000023064/ENSMUSG00000035953/ENSMUSG00000072214/ENSMUSG00000028546/ENSMUSG00000022619/ENSMUSG00000017897/ENSMUSG00000050132/ENSMUSG00000034997/ENSMUSG00000048895/ENSMUSG00000000296/ENSMUSG00000026797/ENSMUSG00000030209/ENSMUSG00000019146/…	705
23	Down	GO:0048812	neuron projection morphogenesis	141/1598	682/21087	9.01E-29	3.09E-26	2.64E-26	ENSMUSG00000020099/ENSMUSG00000032336/ENSMUSG00000028546/ENSMUSG00000022619/ENSMUSG00000050132/ENSMUSG00000048895/ENSMUSG00000026797/ENSMUSG00000057897/ENSMUSG00000041670/ENSMUSG00000059146/ENSMUSG00000032537/ENSMUSG00000031840/ENSMUSG00000059981/ENSMUSG00000020886/ENSMUSG00000022812/ENSMUSG00000030731/ENSMUSG00000029223/ENSMUSG00000025427/ENSMUSG00000038264/ENSMUSG00000022623/ENSMUSG00000029673/…	141
24	Down	GO:0120039	plasma membrane bounded cell projection morphogenesis	141/1598	698/21087	1.08E-27	3.54E-25	3.02E-25	ENSMUSG00000020099/ENSMUSG00000032336/ENSMUSG00000028546/ENSMUSG00000022619/ENSMUSG00000050132/ENSMUSG00000048895/ENSMUSG00000026797/ENSMUSG00000057897/ENSMUSG00000041670/ENSMUSG00000059146/ENSMUSG00000032537/ENSMUSG00000031840/ENSMUSG00000059981/ENSMUSG00000020886/ENSMUSG00000022812/ENSMUSG00000030731/ENSMUSG00000029223/ENSMUSG00000025427/ENSMUSG00000038264/ENSMUSG00000022623/ENSMUSG00000029673/…	141
25	Down	GO:0032990	cell part morphogenesis	144/1598	725/21087	1.76E-27	5.54E-25	4.74E-25	ENSMUSG00000020099/ENSMUSG00000032336/ENSMUSG00000028546/ENSMUSG00000022619/ENSMUSG00000050132/ENSMUSG00000048895/ENSMUSG00000026797/ENSMUSG00000057897/ENSMUSG00000041670/ENSMUSG00000059146/ENSMUSG00000032537/ENSMUSG00000031840/ENSMUSG00000059981/ENSMUSG00000020886/ENSMUSG00000022812/ENSMUSG00000030731/ENSMUSG00000029223/ENSMUSG00000025427/ENSMUSG00000038264/ENSMUSG00000022623/ENSMUSG00000029673/…	144
26	Down	GO:0048858	cell projection morphogenesis	141/1598	703/21087	2.29E-27	6.96E-25	5.95E-25	ENSMUSG00000020099/ENSMUSG00000032336/ENSMUSG00000028546/ENSMUSG00000022619/ENSMUSG00000050132/ENSMUSG00000048895/ENSMUSG00000026797/ENSMUSG00000057897/ENSMUSG00000041670/ENSMUSG00000059146/ENSMUSG00000032537/ENSMUSG00000031840/ENSMUSG00000059981/ENSMUSG00000020886/ENSMUSG00000022812/ENSMUSG00000030731/ENSMUSG00000029223/ENSMUSG00000025427/ENSMUSG00000038264/ENSMUSG00000022623/ENSMUSG00000029673/…	141
27	Down	GO:0120036	plasma membrane bounded cell projection organization	243/1598	1602/21087	4.36E-27	1.27E-24	1.09E-24	ENSMUSG00000020099/ENSMUSG00000032336/ENSMUSG00000028546/ENSMUSG00000022619/ENSMUSG00000050132/ENSMUSG00000048895/ENSMUSG00000026797/ENSMUSG00000030209/ENSMUSG00000057897/ENSMUSG00000020366/ENSMUSG00000003575/ENSMUSG00000041670/ENSMUSG00000059146/ENSMUSG00000032537/ENSMUSG00000006435/ENSMUSG00000031840/ENSMUSG00000059981/ENSMUSG00000024777/ENSMUSG00000035863/ENSMUSG00000020886/ENSMUSG00000022812/…	243
28	Down	GO:0099504	synaptic vesicle cycle	71/1598	221/21087	9.47E-27	2.67E-24	2.28E-24	ENSMUSG00000066392/ENSMUSG00000072214/ENSMUSG00000034997/ENSMUSG00000048895/ENSMUSG00000026797/ENSMUSG00000026825/ENSMUSG00000021816/ENSMUSG00000041670/ENSMUSG00000031840/ENSMUSG00000027577/ENSMUSG00000022812/ENSMUSG00000024743/ENSMUSG00000035390/ENSMUSG00000011877/ENSMUSG00000025855/ENSMUSG00000024127/ENSMUSG00000033615/ENSMUSG00000031144/ENSMUSG00000040722/ENSMUSG00000009894/ENSMUSG00000027438/…	71
29	Down	GO:0032879	regulation of localization	366/1598	2859/21087	2.63E-26	7.14E-24	6.11E-24	ENSMUSG00000066392/ENSMUSG00000017737/ENSMUSG00000032336/ENSMUSG00000020891/ENSMUSG00000036585/ENSMUSG00000024277/ENSMUSG00000042429/ENSMUSG00000047507/ENSMUSG00000021684/ENSMUSG00000027895/ENSMUSG00000050148/ENSMUSG00000021708/ENSMUSG00000025407/ENSMUSG00000023064/ENSMUSG00000072214/ENSMUSG00000027584/ENSMUSG00000031748/ENSMUSG00000022619/ENSMUSG00000034997/ENSMUSG00000048895/ENSMUSG00000026797/…	366
30	Down	GO:0048667	cell morphogenesis involved in neuron differentiation	129/1598	632/21087	7.93E-26	2.08E-23	1.78E-23	ENSMUSG00000020099/ENSMUSG00000032336/ENSMUSG00000028546/ENSMUSG00000022619/ENSMUSG00000050132/ENSMUSG00000048895/ENSMUSG00000026797/ENSMUSG00000057897/ENSMUSG00000059146/ENSMUSG00000032537/ENSMUSG00000031840/ENSMUSG00000059981/ENSMUSG00000020886/ENSMUSG00000022812/ENSMUSG00000029223/ENSMUSG00000025427/ENSMUSG00000038264/ENSMUSG00000022623/ENSMUSG00000029673/ENSMUSG00000053046/ENSMUSG00000059857/…	129
31	Down	GO:0051049	regulation of transport	277/1598	1965/21087	8.47E-26	2.15E-23	1.84E-23	ENSMUSG00000066392/ENSMUSG00000017737/ENSMUSG00000020891/ENSMUSG00000042429/ENSMUSG00000047507/ENSMUSG00000021684/ENSMUSG00000027895/ENSMUSG00000050148/ENSMUSG00000021708/ENSMUSG00000023064/ENSMUSG00000072214/ENSMUSG00000027584/ENSMUSG00000031748/ENSMUSG00000022619/ENSMUSG00000034997/ENSMUSG00000048895/ENSMUSG00000026797/ENSMUSG00000037012/ENSMUSG00000030209/ENSMUSG00000019146/ENSMUSG00000026825/…	277
32	Down	GO:0030030	cell projection organization	244/1598	1648/21087	1.19E-25	2.94E-23	2.51E-23	ENSMUSG00000020099/ENSMUSG00000032336/ENSMUSG00000028546/ENSMUSG00000022619/ENSMUSG00000050132/ENSMUSG00000048895/ENSMUSG00000026797/ENSMUSG00000030209/ENSMUSG00000057897/ENSMUSG00000020366/ENSMUSG00000003575/ENSMUSG00000041670/ENSMUSG00000059146/ENSMUSG00000032537/ENSMUSG00000006435/ENSMUSG00000031840/ENSMUSG00000059981/ENSMUSG00000024777/ENSMUSG00000035863/ENSMUSG00000020886/ENSMUSG00000022812/…	244
33	Down	GO:0051649	establishment of localization in cell	299/1598	2191/21087	1.39E-25	3.32E-23	2.84E-23	ENSMUSG00000066392/ENSMUSG00000042429/ENSMUSG00000047507/ENSMUSG00000021684/ENSMUSG00000027895/ENSMUSG00000023064/ENSMUSG00000072214/ENSMUSG00000028542/ENSMUSG00000034997/ENSMUSG00000048895/ENSMUSG00000026797/ENSMUSG00000030209/ENSMUSG00000019146/ENSMUSG00000026825/ENSMUSG00000042249/ENSMUSG00000020734/ENSMUSG00000021816/ENSMUSG00000041670/ENSMUSG00000006435/ENSMUSG00000031840/ENSMUSG00000005469/…	299
34	Down	GO:0032989	cellular component morphogenesis	152/1598	822/21087	1.50E-25	3.47E-23	2.96E-23	ENSMUSG00000020099/ENSMUSG00000032336/ENSMUSG00000028546/ENSMUSG00000022619/ENSMUSG00000050132/ENSMUSG00000048895/ENSMUSG00000026797/ENSMUSG00000057897/ENSMUSG00000041670/ENSMUSG00000059146/ENSMUSG00000032537/ENSMUSG00000031840/ENSMUSG00000059981/ENSMUSG00000020886/ENSMUSG00000022812/ENSMUSG00000030731/ENSMUSG00000029223/ENSMUSG00000025427/ENSMUSG00000038264/ENSMUSG00000022623/ENSMUSG00000029673/…	152
35	Down	GO:0006836	neurotransmitter transport	83/1598	306/21087	2.13E-25	4.80E-23	4.10E-23	ENSMUSG00000066392/ENSMUSG00000047507/ENSMUSG00000027895/ENSMUSG00000023064/ENSMUSG00000072214/ENSMUSG00000028542/ENSMUSG00000034997/ENSMUSG00000026797/ENSMUSG00000041670/ENSMUSG00000031840/ENSMUSG00000023017/ENSMUSG00000027577/ENSMUSG00000022812/ENSMUSG00000024743/ENSMUSG00000037010/ENSMUSG00000035390/ENSMUSG00000011877/ENSMUSG00000024127/ENSMUSG00000029608/ENSMUSG00000033615/ENSMUSG00000031144/…	83
36	Down	GO:0098655	cation transmembrane transport	145/1598	781/21087	1.41E-24	3.09E-22	2.64E-22	ENSMUSG00000017737/ENSMUSG00000027895/ENSMUSG00000021708/ENSMUSG00000027584/ENSMUSG00000022619/ENSMUSG00000034997/ENSMUSG00000030209/ENSMUSG00000019146/ENSMUSG00000020734/ENSMUSG00000029167/ENSMUSG00000023017/ENSMUSG00000027577/ENSMUSG00000020886/ENSMUSG00000021313/ENSMUSG00000022623/ENSMUSG00000018634/ENSMUSG00000032356/ENSMUSG00000032011/ENSMUSG00000028756/ENSMUSG00000024065/ENSMUSG00000029608/…	145
37	Down	GO:0016192	vesicle-mediated transport	242/1598	1689/21087	2.09E-23	4.44E-21	3.80E-21	ENSMUSG00000066392/ENSMUSG00000047507/ENSMUSG00000050148/ENSMUSG00000027223/ENSMUSG00000072214/ENSMUSG00000034997/ENSMUSG00000048895/ENSMUSG00000026797/ENSMUSG00000019146/ENSMUSG00000026825/ENSMUSG00000042249/ENSMUSG00000021816/ENSMUSG00000041670/ENSMUSG00000060780/ENSMUSG00000006435/ENSMUSG00000031840/ENSMUSG00000027577/ENSMUSG00000020886/ENSMUSG00000034557/ENSMUSG00000039953/ENSMUSG00000022812/…	242
38	Down	GO:0051960	regulation of nervous system development	177/1598	1086/21087	3.92E-23	8.12E-21	6.94E-21	ENSMUSG00000033208/ENSMUSG00000025407/ENSMUSG00000028546/ENSMUSG00000050132/ENSMUSG00000048895/ENSMUSG00000057897/ENSMUSG00000003575/ENSMUSG00000041670/ENSMUSG00000060780/ENSMUSG00000059146/ENSMUSG00000032537/ENSMUSG00000006435/ENSMUSG00000005469/ENSMUSG00000024777/ENSMUSG00000035863/ENSMUSG00000020886/ENSMUSG00000039953/ENSMUSG00000022812/ENSMUSG00000030731/ENSMUSG00000038264/ENSMUSG00000022623/…	177
39	Down	GO:0034220	ion transmembrane transport	163/1598	970/21087	9.74E-23	1.97E-20	1.68E-20	ENSMUSG00000017737/ENSMUSG00000027895/ENSMUSG00000021708/ENSMUSG00000027584/ENSMUSG00000022619/ENSMUSG00000034997/ENSMUSG00000037012/ENSMUSG00000030209/ENSMUSG00000019146/ENSMUSG00000020734/ENSMUSG00000029167/ENSMUSG00000023017/ENSMUSG00000027577/ENSMUSG00000020886/ENSMUSG00000021313/ENSMUSG00000022623/ENSMUSG00000018634/ENSMUSG00000028991/ENSMUSG00000032356/ENSMUSG00000032011/ENSMUSG00000028756/…	163
40	Down	GO:0007610	behavior	133/1598	720/21087	2.17E-22	4.28E-20	3.66E-20	ENSMUSG00000042429/ENSMUSG00000033208/ENSMUSG00000021684/ENSMUSG00000023064/ENSMUSG00000072214/ENSMUSG00000027584/ENSMUSG00000031748/ENSMUSG00000028546/ENSMUSG00000022619/ENSMUSG00000034997/ENSMUSG00000030209/ENSMUSG00000026825/ENSMUSG00000021816/ENSMUSG00000003575/ENSMUSG00000040133/ENSMUSG00000060780/ENSMUSG00000023017/ENSMUSG00000027577/ENSMUSG00000020886/ENSMUSG00000022840/ENSMUSG00000000552/…	133
41	Down	GO:0007269	neurotransmitter secretion	60/1598	192/21087	4.15E-22	7.78E-20	6.65E-20	ENSMUSG00000066392/ENSMUSG00000047507/ENSMUSG00000027895/ENSMUSG00000023064/ENSMUSG00000072214/ENSMUSG00000028542/ENSMUSG00000034997/ENSMUSG00000026797/ENSMUSG00000041670/ENSMUSG00000031840/ENSMUSG00000023017/ENSMUSG00000027577/ENSMUSG00000022812/ENSMUSG00000024743/ENSMUSG00000035390/ENSMUSG00000011877/ENSMUSG00000024127/ENSMUSG00000029608/ENSMUSG00000033615/ENSMUSG00000031144/ENSMUSG00000009894/…	60
42	Down	GO:0099643	signal release from synapse	60/1598	192/21087	4.15E-22	7.78E-20	6.65E-20	ENSMUSG00000066392/ENSMUSG00000047507/ENSMUSG00000027895/ENSMUSG00000023064/ENSMUSG00000072214/ENSMUSG00000028542/ENSMUSG00000034997/ENSMUSG00000026797/ENSMUSG00000041670/ENSMUSG00000031840/ENSMUSG00000023017/ENSMUSG00000027577/ENSMUSG00000022812/ENSMUSG00000024743/ENSMUSG00000035390/ENSMUSG00000011877/ENSMUSG00000024127/ENSMUSG00000029608/ENSMUSG00000033615/ENSMUSG00000031144/ENSMUSG00000009894/…	60
43	Down	GO:0015672	monovalent inorganic cation transport	111/1598	548/21087	4.63E-22	8.48E-20	7.25E-20	ENSMUSG00000042429/ENSMUSG00000027895/ENSMUSG00000034997/ENSMUSG00000023017/ENSMUSG00000019699/ENSMUSG00000028756/ENSMUSG00000061603/ENSMUSG00000096146/ENSMUSG00000034187/ENSMUSG00000049422/ENSMUSG00000040136/ENSMUSG00000050556/ENSMUSG00000079055/ENSMUSG00000009292/ENSMUSG00000040724/ENSMUSG00000028854/ENSMUSG00000027030/ENSMUSG00000028631/ENSMUSG00000029361/ENSMUSG00000062785/ENSMUSG00000020894/…	111
44	Down	GO:0098660	inorganic ion transmembrane transport	136/1598	753/21087	6.00E-22	1.07E-19	9.19E-20	ENSMUSG00000027895/ENSMUSG00000027584/ENSMUSG00000034997/ENSMUSG00000030209/ENSMUSG00000020734/ENSMUSG00000023017/ENSMUSG00000021313/ENSMUSG00000018634/ENSMUSG00000028991/ENSMUSG00000032011/ENSMUSG00000028756/ENSMUSG00000024065/ENSMUSG00000061603/ENSMUSG00000000263/ENSMUSG00000096146/ENSMUSG00000045038/ENSMUSG00000049422/ENSMUSG00000020635/ENSMUSG00000040136/ENSMUSG00000025318/ENSMUSG00000050556/…	136
45	Down	GO:0098662	inorganic cation transmembrane transport	130/1598	710/21087	1.50E-21	2.62E-19	2.24E-19	ENSMUSG00000027895/ENSMUSG00000027584/ENSMUSG00000034997/ENSMUSG00000030209/ENSMUSG00000020734/ENSMUSG00000023017/ENSMUSG00000021313/ENSMUSG00000018634/ENSMUSG00000032011/ENSMUSG00000028756/ENSMUSG00000024065/ENSMUSG00000061603/ENSMUSG00000096146/ENSMUSG00000045038/ENSMUSG00000049422/ENSMUSG00000020635/ENSMUSG00000040136/ENSMUSG00000025318/ENSMUSG00000050556/ENSMUSG00000079055/ENSMUSG00000006930/…	130
46	Down	GO:0061024	membrane organization	212/1598	1454/21087	2.12E-21	3.64E-19	3.11E-19	ENSMUSG00000066392/ENSMUSG00000047507/ENSMUSG00000050148/ENSMUSG00000072214/ENSMUSG00000017897/ENSMUSG00000034997/ENSMUSG00000026797/ENSMUSG00000019146/ENSMUSG00000026825/ENSMUSG00000042249/ENSMUSG00000021816/ENSMUSG00000041670/ENSMUSG00000060780/ENSMUSG00000031840/ENSMUSG00000027577/ENSMUSG00000020886/ENSMUSG00000022812/ENSMUSG00000025499/ENSMUSG00000030731/ENSMUSG00000024743/ENSMUSG00000021567/…	212
47	Down	GO:0007409	axonogenesis	100/1598	473/21087	2.18E-21	3.65E-19	3.12E-19	ENSMUSG00000020099/ENSMUSG00000032336/ENSMUSG00000048895/ENSMUSG00000026797/ENSMUSG00000059146/ENSMUSG00000032537/ENSMUSG00000031840/ENSMUSG00000059981/ENSMUSG00000022812/ENSMUSG00000029223/ENSMUSG00000025427/ENSMUSG00000038264/ENSMUSG00000029673/ENSMUSG00000053046/ENSMUSG00000059857/ENSMUSG00000023328/ENSMUSG00000033618/ENSMUSG00000042700/ENSMUSG00000035390/ENSMUSG00000025582/ENSMUSG00000032011/…	100
48	Down	GO:0060341	regulation of cellular localization	167/1598	1040/21087	3.71E-21	6.09E-19	5.21E-19	ENSMUSG00000066392/ENSMUSG00000047507/ENSMUSG00000021684/ENSMUSG00000027895/ENSMUSG00000023064/ENSMUSG00000072214/ENSMUSG00000034997/ENSMUSG00000048895/ENSMUSG00000026797/ENSMUSG00000019146/ENSMUSG00000026825/ENSMUSG00000057897/ENSMUSG00000021816/ENSMUSG00000025151/ENSMUSG00000041670/ENSMUSG00000031840/ENSMUSG00000005469/ENSMUSG00000023017/ENSMUSG00000027577/ENSMUSG00000022812/ENSMUSG00000025499/…	167
49	Down	GO:0055085	transmembrane transport	200/1598	1352/21087	6.33E-21	1.02E-18	8.70E-19	ENSMUSG00000017737/ENSMUSG00000027895/ENSMUSG00000021708/ENSMUSG00000027584/ENSMUSG00000022619/ENSMUSG00000034997/ENSMUSG00000037012/ENSMUSG00000030209/ENSMUSG00000019146/ENSMUSG00000020734/ENSMUSG00000029167/ENSMUSG00000058441/ENSMUSG00000023017/ENSMUSG00000027577/ENSMUSG00000020886/ENSMUSG00000021313/ENSMUSG00000022623/ENSMUSG00000018634/ENSMUSG00000028991/ENSMUSG00000032356/ENSMUSG00000032011/…	200
50	Down	GO:0065008	regulation of biological quality	457/1598	4086/21087	1.25E-20	1.97E-18	1.69E-18	ENSMUSG00000066392/ENSMUSG00000017737/ENSMUSG00000032336/ENSMUSG00000042429/ENSMUSG00000047507/ENSMUSG00000033208/ENSMUSG00000021684/ENSMUSG00000027895/ENSMUSG00000021708/ENSMUSG00000023064/ENSMUSG00000072214/ENSMUSG00000027584/ENSMUSG00000028546/ENSMUSG00000022619/ENSMUSG00000028542/ENSMUSG00000017897/ENSMUSG00000034997/ENSMUSG00000048895/ENSMUSG00000026797/ENSMUSG00000037012/ENSMUSG00000030209/…	457
51	Down	GO:0000904	cell morphogenesis involved in differentiation	140/1598	813/21087	1.34E-20	2.06E-18	1.76E-18	ENSMUSG00000020099/ENSMUSG00000032336/ENSMUSG00000028546/ENSMUSG00000022619/ENSMUSG00000050132/ENSMUSG00000048895/ENSMUSG00000026797/ENSMUSG00000057897/ENSMUSG00000020366/ENSMUSG00000059146/ENSMUSG00000032537/ENSMUSG00000031840/ENSMUSG00000059981/ENSMUSG00000020886/ENSMUSG00000022812/ENSMUSG00000000552/ENSMUSG00000029223/ENSMUSG00000025427/ENSMUSG00000038264/ENSMUSG00000022623/ENSMUSG00000029673/…	140
52	Down	GO:0098693	regulation of synaptic vesicle cycle	50/1598	146/21087	1.36E-20	2.06E-18	1.76E-18	ENSMUSG00000066392/ENSMUSG00000072214/ENSMUSG00000034997/ENSMUSG00000048895/ENSMUSG00000026797/ENSMUSG00000026825/ENSMUSG00000021816/ENSMUSG00000041670/ENSMUSG00000031840/ENSMUSG00000027577/ENSMUSG00000022812/ENSMUSG00000024743/ENSMUSG00000011877/ENSMUSG00000025855/ENSMUSG00000024127/ENSMUSG00000033615/ENSMUSG00000031144/ENSMUSG00000040722/ENSMUSG00000027438/ENSMUSG00000032890/ENSMUSG00000051790/…	50
53	Down	GO:0061564	axon development	103/1598	509/21087	1.64E-20	2.44E-18	2.09E-18	ENSMUSG00000020099/ENSMUSG00000032336/ENSMUSG00000048895/ENSMUSG00000026797/ENSMUSG00000059146/ENSMUSG00000032537/ENSMUSG00000031840/ENSMUSG00000059981/ENSMUSG00000022812/ENSMUSG00000029223/ENSMUSG00000025427/ENSMUSG00000038264/ENSMUSG00000029673/ENSMUSG00000053046/ENSMUSG00000059857/ENSMUSG00000023328/ENSMUSG00000033618/ENSMUSG00000042700/ENSMUSG00000035390/ENSMUSG00000025582/ENSMUSG00000032011/…	103
54	Down	GO:0010975	regulation of neuron projection development	116/1598	613/21087	1.69E-20	2.46E-18	2.10E-18	ENSMUSG00000028546/ENSMUSG00000050132/ENSMUSG00000048895/ENSMUSG00000057897/ENSMUSG00000003575/ENSMUSG00000041670/ENSMUSG00000059146/ENSMUSG00000006435/ENSMUSG00000024777/ENSMUSG00000035863/ENSMUSG00000020886/ENSMUSG00000022812/ENSMUSG00000030731/ENSMUSG00000038264/ENSMUSG00000022623/ENSMUSG00000028991/ENSMUSG00000053046/ENSMUSG00000008734/ENSMUSG00000023328/ENSMUSG00000033618/ENSMUSG00000042700/…	116
55	Down	GO:0051128	regulation of cellular component organization	306/1598	2436/21087	2.19E-20	3.14E-18	2.68E-18	ENSMUSG00000017737/ENSMUSG00000024277/ENSMUSG00000050148/ENSMUSG00000028546/ENSMUSG00000050132/ENSMUSG00000048895/ENSMUSG00000026797/ENSMUSG00000030209/ENSMUSG00000026825/ENSMUSG00000057897/ENSMUSG00000021816/ENSMUSG00000029167/ENSMUSG00000020366/ENSMUSG00000003575/ENSMUSG00000041670/ENSMUSG00000060780/ENSMUSG00000059146/ENSMUSG00000032537/ENSMUSG00000006435/ENSMUSG00000031840/ENSMUSG00000019997/…	306
56	Down	GO:0042391	regulation of membrane potential	97/1598	471/21087	6.18E-20	8.69E-18	7.43E-18	ENSMUSG00000042429/ENSMUSG00000027895/ENSMUSG00000022619/ENSMUSG00000030209/ENSMUSG00000019146/ENSMUSG00000020734/ENSMUSG00000003575/ENSMUSG00000041670/ENSMUSG00000059146/ENSMUSG00000023017/ENSMUSG00000027577/ENSMUSG00000020886/ENSMUSG00000017314/ENSMUSG00000022812/ENSMUSG00000021313/ENSMUSG00000022623/ENSMUSG00000078566/ENSMUSG00000031654/ENSMUSG00000026697/ENSMUSG00000028756/ENSMUSG00000024858/…	97
57	Down	GO:0045664	regulation of neuron differentiation	135/1598	786/21087	8.68E-20	1.20E-17	1.03E-17	ENSMUSG00000028546/ENSMUSG00000050132/ENSMUSG00000048895/ENSMUSG00000057897/ENSMUSG00000003575/ENSMUSG00000041670/ENSMUSG00000059146/ENSMUSG00000006435/ENSMUSG00000024777/ENSMUSG00000035863/ENSMUSG00000020886/ENSMUSG00000022812/ENSMUSG00000030731/ENSMUSG00000038264/ENSMUSG00000022623/ENSMUSG00000028991/ENSMUSG00000053046/ENSMUSG00000008734/ENSMUSG00000023328/ENSMUSG00000033618/ENSMUSG00000042700/…	135
58	Down	GO:0016050	vesicle organization	158/1598	996/21087	1.61E-19	2.19E-17	1.87E-17	ENSMUSG00000066392/ENSMUSG00000047507/ENSMUSG00000050148/ENSMUSG00000072214/ENSMUSG00000034997/ENSMUSG00000026797/ENSMUSG00000019146/ENSMUSG00000026825/ENSMUSG00000042249/ENSMUSG00000021816/ENSMUSG00000041670/ENSMUSG00000060780/ENSMUSG00000031840/ENSMUSG00000027577/ENSMUSG00000020886/ENSMUSG00000022812/ENSMUSG00000025499/ENSMUSG00000030731/ENSMUSG00000000552/ENSMUSG00000024743/ENSMUSG00000021567/…	158
59	Down	GO:0048468	cell development	300/1598	2415/21087	3.04E-19	4.06E-17	3.47E-17	ENSMUSG00000020099/ENSMUSG00000032336/ENSMUSG00000028546/ENSMUSG00000022619/ENSMUSG00000050132/ENSMUSG00000048895/ENSMUSG00000026797/ENSMUSG00000057897/ENSMUSG00000020366/ENSMUSG00000003575/ENSMUSG00000041670/ENSMUSG00000005045/ENSMUSG00000059146/ENSMUSG00000032537/ENSMUSG00000006435/ENSMUSG00000031840/ENSMUSG00000059981/ENSMUSG00000005469/ENSMUSG00000024777/ENSMUSG00000035863/ENSMUSG00000020886/…	300
60	Down	GO:0006887	exocytosis	83/1598	375/21087	3.09E-19	4.06E-17	3.47E-17	ENSMUSG00000066392/ENSMUSG00000047507/ENSMUSG00000072214/ENSMUSG00000034997/ENSMUSG00000026797/ENSMUSG00000021816/ENSMUSG00000041670/ENSMUSG00000031840/ENSMUSG00000027577/ENSMUSG00000022812/ENSMUSG00000030731/ENSMUSG00000024743/ENSMUSG00000021567/ENSMUSG00000018634/ENSMUSG00000053046/ENSMUSG00000051343/ENSMUSG00000011877/ENSMUSG00000024127/ENSMUSG00000054459/ENSMUSG00000025793/ENSMUSG00000033615/…	83
61	Down	GO:0120035	regulation of plasma membrane bounded cell projection organization	132/1598	785/21087	1.45E-18	1.88E-16	1.61E-16	ENSMUSG00000028546/ENSMUSG00000050132/ENSMUSG00000048895/ENSMUSG00000030209/ENSMUSG00000057897/ENSMUSG00000003575/ENSMUSG00000041670/ENSMUSG00000059146/ENSMUSG00000006435/ENSMUSG00000024777/ENSMUSG00000035863/ENSMUSG00000020886/ENSMUSG00000022812/ENSMUSG00000025499/ENSMUSG00000030731/ENSMUSG00000038264/ENSMUSG00000022623/ENSMUSG00000029673/ENSMUSG00000028991/ENSMUSG00000053046/ENSMUSG00000008734/…	132
62	Down	GO:0000902	cell morphogenesis	168/1598	1113/21087	1.67E-18	2.12E-16	1.81E-16	ENSMUSG00000020099/ENSMUSG00000032336/ENSMUSG00000033208/ENSMUSG00000028546/ENSMUSG00000022619/ENSMUSG00000050132/ENSMUSG00000048895/ENSMUSG00000026797/ENSMUSG00000057897/ENSMUSG00000020366/ENSMUSG00000041670/ENSMUSG00000059146/ENSMUSG00000032537/ENSMUSG00000031840/ENSMUSG00000059981/ENSMUSG00000035863/ENSMUSG00000020886/ENSMUSG00000022812/ENSMUSG00000030731/ENSMUSG00000000552/ENSMUSG00000029223/…	168
63	Down	GO:0050767	regulation of neurogenesis	152/1598	968/21087	2.20E-18	2.75E-16	2.35E-16	ENSMUSG00000028546/ENSMUSG00000050132/ENSMUSG00000048895/ENSMUSG00000057897/ENSMUSG00000003575/ENSMUSG00000041670/ENSMUSG00000059146/ENSMUSG00000006435/ENSMUSG00000024777/ENSMUSG00000035863/ENSMUSG00000020886/ENSMUSG00000022812/ENSMUSG00000030731/ENSMUSG00000038264/ENSMUSG00000022623/ENSMUSG00000028991/ENSMUSG00000053046/ENSMUSG00000008734/ENSMUSG00000023328/ENSMUSG00000033618/ENSMUSG00000042700/…	152
64	Down	GO:0031344	regulation of cell projection organization	132/1598	794/21087	3.87E-18	4.77E-16	4.08E-16	ENSMUSG00000028546/ENSMUSG00000050132/ENSMUSG00000048895/ENSMUSG00000030209/ENSMUSG00000057897/ENSMUSG00000003575/ENSMUSG00000041670/ENSMUSG00000059146/ENSMUSG00000006435/ENSMUSG00000024777/ENSMUSG00000035863/ENSMUSG00000020886/ENSMUSG00000022812/ENSMUSG00000025499/ENSMUSG00000030731/ENSMUSG00000038264/ENSMUSG00000022623/ENSMUSG00000029673/ENSMUSG00000028991/ENSMUSG00000053046/ENSMUSG00000008734/…	132
65	Down	GO:0060627	regulation of vesicle-mediated transport	107/1598	584/21087	6.31E-18	7.65E-16	6.54E-16	ENSMUSG00000066392/ENSMUSG00000047507/ENSMUSG00000050148/ENSMUSG00000072214/ENSMUSG00000034997/ENSMUSG00000048895/ENSMUSG00000026797/ENSMUSG00000026825/ENSMUSG00000021816/ENSMUSG00000041670/ENSMUSG00000060780/ENSMUSG00000031840/ENSMUSG00000027577/ENSMUSG00000020886/ENSMUSG00000022812/ENSMUSG00000030731/ENSMUSG00000024743/ENSMUSG00000018634/ENSMUSG00000037010/ENSMUSG00000011877/ENSMUSG00000025855/…	107
66	Down	GO:0033036	macromolecule localization	366/1598	3188/21087	7.06E-18	8.43E-16	7.21E-16	ENSMUSG00000032336/ENSMUSG00000020891/ENSMUSG00000024277/ENSMUSG00000042429/ENSMUSG00000047507/ENSMUSG00000021684/ENSMUSG00000023064/ENSMUSG00000034997/ENSMUSG00000048895/ENSMUSG00000026797/ENSMUSG00000037012/ENSMUSG00000030209/ENSMUSG00000019146/ENSMUSG00000026825/ENSMUSG00000057897/ENSMUSG00000042249/ENSMUSG00000020734/ENSMUSG00000021816/ENSMUSG00000025151/ENSMUSG00000058441/ENSMUSG00000020366/…	366
67	Down	GO:0006906	vesicle fusion	86/1598	420/21087	1.21E-17	1.42E-15	1.22E-15	ENSMUSG00000066392/ENSMUSG00000047507/ENSMUSG00000072214/ENSMUSG00000034997/ENSMUSG00000026797/ENSMUSG00000021816/ENSMUSG00000041670/ENSMUSG00000031840/ENSMUSG00000027577/ENSMUSG00000022812/ENSMUSG00000030731/ENSMUSG00000024743/ENSMUSG00000021567/ENSMUSG00000018634/ENSMUSG00000053046/ENSMUSG00000051343/ENSMUSG00000011877/ENSMUSG00000024127/ENSMUSG00000054459/ENSMUSG00000025793/ENSMUSG00000033615/…	86
68	Down	GO:0034330	cell junction organization	117/1598	674/21087	1.25E-17	1.45E-15	1.24E-15	ENSMUSG00000066392/ENSMUSG00000032336/ENSMUSG00000024277/ENSMUSG00000023064/ENSMUSG00000048895/ENSMUSG00000030209/ENSMUSG00000019146/ENSMUSG00000057897/ENSMUSG00000060780/ENSMUSG00000059146/ENSMUSG00000032537/ENSMUSG00000006435/ENSMUSG00000031840/ENSMUSG00000059981/ENSMUSG00000005469/ENSMUSG00000035863/ENSMUSG00000040797/ENSMUSG00000020886/ENSMUSG00000039953/ENSMUSG00000022812/ENSMUSG00000022623/…	117
69	Down	GO:0099500	vesicle fusion to plasma membrane	73/1598	325/21087	1.93E-17	2.18E-15	1.86E-15	ENSMUSG00000066392/ENSMUSG00000047507/ENSMUSG00000072214/ENSMUSG00000034997/ENSMUSG00000026797/ENSMUSG00000021816/ENSMUSG00000041670/ENSMUSG00000031840/ENSMUSG00000027577/ENSMUSG00000022812/ENSMUSG00000030731/ENSMUSG00000024743/ENSMUSG00000018634/ENSMUSG00000051343/ENSMUSG00000011877/ENSMUSG00000024127/ENSMUSG00000054459/ENSMUSG00000025793/ENSMUSG00000033615/ENSMUSG00000031144/ENSMUSG00000040722/…	73
70	Down	GO:0140029	exocytic process	73/1598	325/21087	1.93E-17	2.18E-15	1.86E-15	ENSMUSG00000066392/ENSMUSG00000047507/ENSMUSG00000072214/ENSMUSG00000034997/ENSMUSG00000026797/ENSMUSG00000021816/ENSMUSG00000041670/ENSMUSG00000031840/ENSMUSG00000027577/ENSMUSG00000022812/ENSMUSG00000030731/ENSMUSG00000024743/ENSMUSG00000018634/ENSMUSG00000051343/ENSMUSG00000011877/ENSMUSG00000024127/ENSMUSG00000054459/ENSMUSG00000025793/ENSMUSG00000033615/ENSMUSG00000031144/ENSMUSG00000040722/…	73
71	Down	GO:0051962	positive regulation of nervous system development	115/1598	661/21087	2.02E-17	2.24E-15	1.92E-15	ENSMUSG00000033208/ENSMUSG00000025407/ENSMUSG00000028546/ENSMUSG00000057897/ENSMUSG00000003575/ENSMUSG00000041670/ENSMUSG00000060780/ENSMUSG00000059146/ENSMUSG00000032537/ENSMUSG00000006435/ENSMUSG00000024777/ENSMUSG00000035863/ENSMUSG00000020886/ENSMUSG00000039953/ENSMUSG00000022812/ENSMUSG00000030731/ENSMUSG00000038264/ENSMUSG00000022623/ENSMUSG00000028991/ENSMUSG00000008734/ENSMUSG00000023328/…	115
72	Down	GO:0090174	organelle membrane fusion	86/1598	426/21087	3.02E-17	3.28E-15	2.81E-15	ENSMUSG00000066392/ENSMUSG00000047507/ENSMUSG00000072214/ENSMUSG00000034997/ENSMUSG00000026797/ENSMUSG00000021816/ENSMUSG00000041670/ENSMUSG00000031840/ENSMUSG00000027577/ENSMUSG00000022812/ENSMUSG00000030731/ENSMUSG00000024743/ENSMUSG00000021567/ENSMUSG00000018634/ENSMUSG00000053046/ENSMUSG00000051343/ENSMUSG00000011877/ENSMUSG00000024127/ENSMUSG00000054459/ENSMUSG00000025793/ENSMUSG00000033615/…	86
73	Down	GO:1902414	protein localization to cell junction	41/1598	119/21087	3.04E-17	3.28E-15	2.81E-15	ENSMUSG00000032336/ENSMUSG00000019146/ENSMUSG00000020734/ENSMUSG00000020366/ENSMUSG00000060780/ENSMUSG00000020886/ENSMUSG00000039953/ENSMUSG00000022812/ENSMUSG00000025499/ENSMUSG00000011877/ENSMUSG00000025582/ENSMUSG00000030098/ENSMUSG00000027254/ENSMUSG00000033615/ENSMUSG00000059991/ENSMUSG00000009894/ENSMUSG00000024873/ENSMUSG00000027273/ENSMUSG00000051790/ENSMUSG00000029126/ENSMUSG00000030805/…	41
74	Down	GO:0051588	regulation of neurotransmitter transport	52/1598	184/21087	3.15E-17	3.35E-15	2.87E-15	ENSMUSG00000066392/ENSMUSG00000047507/ENSMUSG00000027895/ENSMUSG00000023064/ENSMUSG00000072214/ENSMUSG00000034997/ENSMUSG00000026797/ENSMUSG00000041670/ENSMUSG00000031840/ENSMUSG00000023017/ENSMUSG00000027577/ENSMUSG00000022812/ENSMUSG00000024743/ENSMUSG00000037010/ENSMUSG00000011877/ENSMUSG00000024127/ENSMUSG00000033615/ENSMUSG00000031144/ENSMUSG00000026179/ENSMUSG00000027438/ENSMUSG00000030310/…	52
75	Down	GO:0006996	organelle organization	474/1598	4452/21087	3.23E-17	3.40E-15	2.90E-15	ENSMUSG00000066392/ENSMUSG00000017737/ENSMUSG00000024277/ENSMUSG00000047507/ENSMUSG00000050148/ENSMUSG00000072214/ENSMUSG00000017897/ENSMUSG00000034997/ENSMUSG00000048895/ENSMUSG00000000296/ENSMUSG00000026797/ENSMUSG00000019146/ENSMUSG00000026825/ENSMUSG00000057897/ENSMUSG00000042249/ENSMUSG00000021816/ENSMUSG00000029167/ENSMUSG00000020366/ENSMUSG00000041670/ENSMUSG00000005045/ENSMUSG00000060780/…	474
76	Down	GO:0045055	regulated exocytosis	63/1598	257/21087	3.45E-17	3.58E-15	3.06E-15	ENSMUSG00000066392/ENSMUSG00000047507/ENSMUSG00000072214/ENSMUSG00000034997/ENSMUSG00000026797/ENSMUSG00000021816/ENSMUSG00000041670/ENSMUSG00000031840/ENSMUSG00000027577/ENSMUSG00000022812/ENSMUSG00000030731/ENSMUSG00000024743/ENSMUSG00000018634/ENSMUSG00000051343/ENSMUSG00000011877/ENSMUSG00000024127/ENSMUSG00000033615/ENSMUSG00000031144/ENSMUSG00000040722/ENSMUSG00000009894/ENSMUSG00000027438/…	63
77	Down	GO:0035418	protein localization to synapse	38/1598	104/21087	4.53E-17	4.64E-15	3.96E-15	ENSMUSG00000032336/ENSMUSG00000019146/ENSMUSG00000020734/ENSMUSG00000060780/ENSMUSG00000020886/ENSMUSG00000039953/ENSMUSG00000022812/ENSMUSG00000025499/ENSMUSG00000011877/ENSMUSG00000025582/ENSMUSG00000030098/ENSMUSG00000027254/ENSMUSG00000033615/ENSMUSG00000059991/ENSMUSG00000009894/ENSMUSG00000024873/ENSMUSG00000027273/ENSMUSG00000051790/ENSMUSG00000029126/ENSMUSG00000030805/ENSMUSG00000024163/…	38
78	Down	GO:0048284	organelle fusion	88/1598	446/21087	5.67E-17	5.71E-15	4.88E-15	ENSMUSG00000066392/ENSMUSG00000047507/ENSMUSG00000072214/ENSMUSG00000034997/ENSMUSG00000026797/ENSMUSG00000021816/ENSMUSG00000041670/ENSMUSG00000031840/ENSMUSG00000027577/ENSMUSG00000022812/ENSMUSG00000030731/ENSMUSG00000024743/ENSMUSG00000021567/ENSMUSG00000078566/ENSMUSG00000018634/ENSMUSG00000053046/ENSMUSG00000051343/ENSMUSG00000011877/ENSMUSG00000024127/ENSMUSG00000054459/ENSMUSG00000025793/…	88
79	Down	GO:0050808	synapse organization	89/1598	454/21087	5.73E-17	5.71E-15	4.88E-15	ENSMUSG00000066392/ENSMUSG00000032336/ENSMUSG00000023064/ENSMUSG00000048895/ENSMUSG00000030209/ENSMUSG00000019146/ENSMUSG00000057897/ENSMUSG00000060780/ENSMUSG00000059146/ENSMUSG00000032537/ENSMUSG00000006435/ENSMUSG00000031840/ENSMUSG00000035863/ENSMUSG00000040797/ENSMUSG00000020886/ENSMUSG00000039953/ENSMUSG00000022812/ENSMUSG00000022623/ENSMUSG00000059857/ENSMUSG00000023328/ENSMUSG00000042700/…	89
80	Down	GO:0060284	regulation of cell development	163/1598	1107/21087	6.16E-17	6.07E-15	5.19E-15	ENSMUSG00000028546/ENSMUSG00000050132/ENSMUSG00000048895/ENSMUSG00000057897/ENSMUSG00000020366/ENSMUSG00000003575/ENSMUSG00000041670/ENSMUSG00000059146/ENSMUSG00000006435/ENSMUSG00000024777/ENSMUSG00000035863/ENSMUSG00000020886/ENSMUSG00000022812/ENSMUSG00000030731/ENSMUSG00000038264/ENSMUSG00000022623/ENSMUSG00000028991/ENSMUSG00000053046/ENSMUSG00000008734/ENSMUSG00000023328/ENSMUSG00000033618/…	163
81	Down	GO:0043269	regulation of ion transport	123/1598	741/21087	6.53E-17	6.36E-15	5.43E-15	ENSMUSG00000017737/ENSMUSG00000042429/ENSMUSG00000027895/ENSMUSG00000021708/ENSMUSG00000023064/ENSMUSG00000027584/ENSMUSG00000031748/ENSMUSG00000022619/ENSMUSG00000034997/ENSMUSG00000026797/ENSMUSG00000037012/ENSMUSG00000030209/ENSMUSG00000019146/ENSMUSG00000029167/ENSMUSG00000020366/ENSMUSG00000027577/ENSMUSG00000020886/ENSMUSG00000030731/ENSMUSG00000021313/ENSMUSG00000024743/ENSMUSG00000022623/…	123
82	Down	GO:0070727	cellular macromolecule localization	249/1598	1974/21087	1.05E-16	1.01E-14	8.64E-15	ENSMUSG00000024277/ENSMUSG00000042429/ENSMUSG00000034997/ENSMUSG00000048895/ENSMUSG00000026797/ENSMUSG00000037012/ENSMUSG00000030209/ENSMUSG00000019146/ENSMUSG00000026825/ENSMUSG00000057897/ENSMUSG00000042249/ENSMUSG00000020734/ENSMUSG00000025151/ENSMUSG00000041670/ENSMUSG00000006435/ENSMUSG00000031840/ENSMUSG00000005469/ENSMUSG00000035863/ENSMUSG00000020886/ENSMUSG00000039953/ENSMUSG00000022812/…	249
83	Down	GO:0034613	cellular protein localization	248/1598	1964/21087	1.08E-16	1.03E-14	8.77E-15	ENSMUSG00000024277/ENSMUSG00000042429/ENSMUSG00000034997/ENSMUSG00000048895/ENSMUSG00000026797/ENSMUSG00000037012/ENSMUSG00000030209/ENSMUSG00000019146/ENSMUSG00000026825/ENSMUSG00000057897/ENSMUSG00000042249/ENSMUSG00000020734/ENSMUSG00000025151/ENSMUSG00000041670/ENSMUSG00000006435/ENSMUSG00000031840/ENSMUSG00000005469/ENSMUSG00000035863/ENSMUSG00000020886/ENSMUSG00000039953/ENSMUSG00000022812/…	248
84	Down	GO:0008104	protein localization	329/1598	2856/21087	3.68E-16	3.45E-14	2.95E-14	ENSMUSG00000032336/ENSMUSG00000020891/ENSMUSG00000024277/ENSMUSG00000042429/ENSMUSG00000047507/ENSMUSG00000021684/ENSMUSG00000023064/ENSMUSG00000034997/ENSMUSG00000048895/ENSMUSG00000026797/ENSMUSG00000037012/ENSMUSG00000030209/ENSMUSG00000019146/ENSMUSG00000026825/ENSMUSG00000057897/ENSMUSG00000042249/ENSMUSG00000020734/ENSMUSG00000021816/ENSMUSG00000025151/ENSMUSG00000058441/ENSMUSG00000020366/…	329
85	Down	GO:0001505	regulation of neurotransmitter levels	78/1598	381/21087	4.10E-16	3.80E-14	3.25E-14	ENSMUSG00000066392/ENSMUSG00000047507/ENSMUSG00000027895/ENSMUSG00000023064/ENSMUSG00000072214/ENSMUSG00000028542/ENSMUSG00000034997/ENSMUSG00000026797/ENSMUSG00000020366/ENSMUSG00000041670/ENSMUSG00000031840/ENSMUSG00000023017/ENSMUSG00000027577/ENSMUSG00000022812/ENSMUSG00000024743/ENSMUSG00000028991/ENSMUSG00000023328/ENSMUSG00000035390/ENSMUSG00000011877/ENSMUSG00000024127/ENSMUSG00000029608/…	78
86	Down	GO:0046928	regulation of neurotransmitter secretion	42/1598	136/21087	1.10E-15	1.01E-13	8.64E-14	ENSMUSG00000066392/ENSMUSG00000047507/ENSMUSG00000027895/ENSMUSG00000023064/ENSMUSG00000072214/ENSMUSG00000034997/ENSMUSG00000026797/ENSMUSG00000041670/ENSMUSG00000031840/ENSMUSG00000023017/ENSMUSG00000027577/ENSMUSG00000022812/ENSMUSG00000024743/ENSMUSG00000011877/ENSMUSG00000024127/ENSMUSG00000033615/ENSMUSG00000031144/ENSMUSG00000026179/ENSMUSG00000027438/ENSMUSG00000032890/ENSMUSG00000045038/…	42
87	Down	GO:0030001	metal ion transport	132/1598	858/21087	2.33E-15	2.11E-13	1.81E-13	ENSMUSG00000042429/ENSMUSG00000027895/ENSMUSG00000027584/ENSMUSG00000031748/ENSMUSG00000034997/ENSMUSG00000030209/ENSMUSG00000019146/ENSMUSG00000057897/ENSMUSG00000020734/ENSMUSG00000019997/ENSMUSG00000023017/ENSMUSG00000027577/ENSMUSG00000021313/ENSMUSG00000019699/ENSMUSG00000018634/ENSMUSG00000032011/ENSMUSG00000024065/ENSMUSG00000061603/ENSMUSG00000096146/ENSMUSG00000025813/ENSMUSG00000028161/…	132
88	Down	GO:0072657	protein localization to membrane	98/1598	557/21087	2.50E-15	2.24E-13	1.91E-13	ENSMUSG00000042429/ENSMUSG00000048895/ENSMUSG00000026797/ENSMUSG00000030209/ENSMUSG00000019146/ENSMUSG00000057897/ENSMUSG00000020734/ENSMUSG00000031840/ENSMUSG00000035863/ENSMUSG00000020886/ENSMUSG00000039953/ENSMUSG00000022812/ENSMUSG00000025499/ENSMUSG00000021567/ENSMUSG00000022623/ENSMUSG00000045377/ENSMUSG00000011877/ENSMUSG00000025582/ENSMUSG00000032011/ENSMUSG00000024127/ENSMUSG00000024065/…	98
89	Down	GO:0016079	synaptic vesicle exocytosis	42/1598	140/21087	3.47E-15	3.07E-13	2.63E-13	ENSMUSG00000066392/ENSMUSG00000072214/ENSMUSG00000034997/ENSMUSG00000026797/ENSMUSG00000041670/ENSMUSG00000031840/ENSMUSG00000027577/ENSMUSG00000022812/ENSMUSG00000024743/ENSMUSG00000011877/ENSMUSG00000024127/ENSMUSG00000033615/ENSMUSG00000031144/ENSMUSG00000009894/ENSMUSG00000027438/ENSMUSG00000032890/ENSMUSG00000027273/ENSMUSG00000045038/ENSMUSG00000027805/ENSMUSG00000030805/ENSMUSG00000003863/…	42
90	Down	GO:0048731	system development	490/1598	4757/21087	3.86E-15	3.38E-13	2.89E-13	ENSMUSG00000066392/ENSMUSG00000017737/ENSMUSG00000020099/ENSMUSG00000032336/ENSMUSG00000020891/ENSMUSG00000036585/ENSMUSG00000033208/ENSMUSG00000025407/ENSMUSG00000028546/ENSMUSG00000022619/ENSMUSG00000050132/ENSMUSG00000048895/ENSMUSG00000026797/ENSMUSG00000019428/ENSMUSG00000030209/ENSMUSG00000057897/ENSMUSG00000021816/ENSMUSG00000025151/ENSMUSG00000029167/ENSMUSG00000020366/ENSMUSG00000003575/…	490
91	Down	GO:0017157	regulation of exocytosis	58/1598	246/21087	4.06E-15	3.51E-13	3.00E-13	ENSMUSG00000066392/ENSMUSG00000047507/ENSMUSG00000072214/ENSMUSG00000034997/ENSMUSG00000026797/ENSMUSG00000041670/ENSMUSG00000031840/ENSMUSG00000027577/ENSMUSG00000022812/ENSMUSG00000030731/ENSMUSG00000024743/ENSMUSG00000018634/ENSMUSG00000011877/ENSMUSG00000024127/ENSMUSG00000054459/ENSMUSG00000025793/ENSMUSG00000033615/ENSMUSG00000031144/ENSMUSG00000040722/ENSMUSG00000027438/ENSMUSG00000034187/…	58
92	Down	GO:0140352	export from cell	160/1598	1138/21087	8.06E-15	6.91E-13	5.91E-13	ENSMUSG00000066392/ENSMUSG00000020891/ENSMUSG00000042429/ENSMUSG00000047507/ENSMUSG00000021684/ENSMUSG00000027895/ENSMUSG00000023064/ENSMUSG00000072214/ENSMUSG00000028542/ENSMUSG00000034997/ENSMUSG00000026797/ENSMUSG00000037012/ENSMUSG00000030209/ENSMUSG00000021816/ENSMUSG00000058441/ENSMUSG00000020366/ENSMUSG00000041670/ENSMUSG00000031840/ENSMUSG00000019997/ENSMUSG00000023017/ENSMUSG00000027577/…	160
93	Down	GO:0010976	positive regulation of neuron projection development	74/1598	370/21087	8.57E-15	7.26E-13	6.21E-13	ENSMUSG00000028546/ENSMUSG00000057897/ENSMUSG00000003575/ENSMUSG00000041670/ENSMUSG00000059146/ENSMUSG00000006435/ENSMUSG00000024777/ENSMUSG00000035863/ENSMUSG00000020886/ENSMUSG00000022812/ENSMUSG00000030731/ENSMUSG00000038264/ENSMUSG00000022623/ENSMUSG00000028991/ENSMUSG00000008734/ENSMUSG00000023328/ENSMUSG00000033618/ENSMUSG00000090223/ENSMUSG00000055471/ENSMUSG00000051149/ENSMUSG00000030110/…	74
94	Down	GO:1903305	regulation of regulated secretory pathway	49/1598	188/21087	8.69E-15	7.29E-13	6.23E-13	ENSMUSG00000066392/ENSMUSG00000047507/ENSMUSG00000072214/ENSMUSG00000034997/ENSMUSG00000026797/ENSMUSG00000041670/ENSMUSG00000031840/ENSMUSG00000027577/ENSMUSG00000022812/ENSMUSG00000030731/ENSMUSG00000024743/ENSMUSG00000018634/ENSMUSG00000011877/ENSMUSG00000024127/ENSMUSG00000033615/ENSMUSG00000031144/ENSMUSG00000040722/ENSMUSG00000027438/ENSMUSG00000032890/ENSMUSG00000045038/ENSMUSG00000027805/…	49
95	Down	GO:0007626	locomotory behavior	58/1598	251/21087	1.05E-14	8.72E-13	7.45E-13	ENSMUSG00000023064/ENSMUSG00000027584/ENSMUSG00000031748/ENSMUSG00000028546/ENSMUSG00000026825/ENSMUSG00000021816/ENSMUSG00000060780/ENSMUSG00000027577/ENSMUSG00000020886/ENSMUSG00000022840/ENSMUSG00000000552/ENSMUSG00000029223/ENSMUSG00000022623/ENSMUSG00000018634/ENSMUSG00000028991/ENSMUSG00000008734/ENSMUSG00000019828/ENSMUSG00000055471/ENSMUSG00000000263/ENSMUSG00000000632/ENSMUSG00000027273/…	58
96	Down	GO:0032940	secretion by cell	155/1598	1095/21087	1.24E-14	1.02E-12	8.69E-13	ENSMUSG00000066392/ENSMUSG00000020891/ENSMUSG00000042429/ENSMUSG00000047507/ENSMUSG00000021684/ENSMUSG00000027895/ENSMUSG00000023064/ENSMUSG00000072214/ENSMUSG00000028542/ENSMUSG00000034997/ENSMUSG00000026797/ENSMUSG00000037012/ENSMUSG00000030209/ENSMUSG00000021816/ENSMUSG00000058441/ENSMUSG00000020366/ENSMUSG00000041670/ENSMUSG00000031840/ENSMUSG00000019997/ENSMUSG00000023017/ENSMUSG00000027577/…	155
97	Down	GO:0031346	positive regulation of cell projection organization	86/1598	475/21087	2.49E-14	2.01E-12	1.72E-12	ENSMUSG00000028546/ENSMUSG00000057897/ENSMUSG00000003575/ENSMUSG00000041670/ENSMUSG00000059146/ENSMUSG00000006435/ENSMUSG00000024777/ENSMUSG00000035863/ENSMUSG00000020886/ENSMUSG00000022812/ENSMUSG00000025499/ENSMUSG00000030731/ENSMUSG00000038264/ENSMUSG00000022623/ENSMUSG00000029673/ENSMUSG00000028991/ENSMUSG00000008734/ENSMUSG00000023328/ENSMUSG00000033618/ENSMUSG00000090223/ENSMUSG00000055471/…	86
98	Down	GO:0050905	neuromuscular process	40/1598	135/21087	2.50E-14	2.01E-12	1.72E-12	ENSMUSG00000021684/ENSMUSG00000030209/ENSMUSG00000057897/ENSMUSG00000020734/ENSMUSG00000020886/ENSMUSG00000022840/ENSMUSG00000029223/ENSMUSG00000022623/ENSMUSG00000000263/ENSMUSG00000026179/ENSMUSG00000051790/ENSMUSG00000025318/ENSMUSG00000017631/ENSMUSG00000045114/ENSMUSG00000026959/ENSMUSG00000002771/ENSMUSG00000062991/ENSMUSG00000038738/ENSMUSG00000030302/ENSMUSG00000022208/ENSMUSG00000014592/…	40
99	Down	GO:0034765	regulation of ion transmembrane transport	87/1598	485/21087	3.06E-14	2.43E-12	2.08E-12	ENSMUSG00000017737/ENSMUSG00000027895/ENSMUSG00000021708/ENSMUSG00000027584/ENSMUSG00000022619/ENSMUSG00000037012/ENSMUSG00000019146/ENSMUSG00000029167/ENSMUSG00000027577/ENSMUSG00000020886/ENSMUSG00000021313/ENSMUSG00000022623/ENSMUSG00000018634/ENSMUSG00000028991/ENSMUSG00000032356/ENSMUSG00000032011/ENSMUSG00000028756/ENSMUSG00000024065/ENSMUSG00000029608/ENSMUSG00000061603/ENSMUSG00000096146/…	87
100	Down	GO:0045666	positive regulation of neuron differentiation	85/1598	469/21087	3.34E-14	2.63E-12	2.25E-12	ENSMUSG00000028546/ENSMUSG00000057897/ENSMUSG00000003575/ENSMUSG00000041670/ENSMUSG00000059146/ENSMUSG00000006435/ENSMUSG00000024777/ENSMUSG00000035863/ENSMUSG00000020886/ENSMUSG00000022812/ENSMUSG00000030731/ENSMUSG00000038264/ENSMUSG00000022623/ENSMUSG00000028991/ENSMUSG00000008734/ENSMUSG00000023328/ENSMUSG00000033618/ENSMUSG00000090223/ENSMUSG00000055471/ENSMUSG00000051149/ENSMUSG00000030098/…	85
101	Down	GO:0062237	protein localization to postsynapse	27/1598	66/21087	6.11E-14	4.77E-12	4.07E-12	ENSMUSG00000019146/ENSMUSG00000020734/ENSMUSG00000020886/ENSMUSG00000039953/ENSMUSG00000022812/ENSMUSG00000025499/ENSMUSG00000011877/ENSMUSG00000025582/ENSMUSG00000030098/ENSMUSG00000033615/ENSMUSG00000059991/ENSMUSG00000009894/ENSMUSG00000027273/ENSMUSG00000029126/ENSMUSG00000030805/ENSMUSG00000033389/ENSMUSG00000030806/ENSMUSG00000041115/ENSMUSG00000029053/ENSMUSG00000025920/ENSMUSG00000026959/…	27
102	Down	GO:0008088	axo-dendritic transport	29/1598	76/21087	6.26E-14	4.84E-12	4.14E-12	ENSMUSG00000029223/ENSMUSG00000027254/ENSMUSG00000024873/ENSMUSG00000057531/ENSMUSG00000040687/ENSMUSG00000024163/ENSMUSG00000006930/ENSMUSG00000025920/ENSMUSG00000021288/ENSMUSG00000026131/ENSMUSG00000020198/ENSMUSG00000022054/ENSMUSG00000018736/ENSMUSG00000015222/ENSMUSG00000052572/ENSMUSG00000018707/ENSMUSG00000032118/ENSMUSG00000074657/ENSMUSG00000055407/ENSMUSG00000022055/ENSMUSG00000042766/…	29
103	Down	GO:0098930	axonal transport	25/1598	58/21087	1.23E-13	9.38E-12	8.02E-12	ENSMUSG00000029223/ENSMUSG00000027254/ENSMUSG00000024873/ENSMUSG00000057531/ENSMUSG00000040687/ENSMUSG00000024163/ENSMUSG00000006930/ENSMUSG00000026131/ENSMUSG00000020198/ENSMUSG00000018736/ENSMUSG00000015222/ENSMUSG00000052572/ENSMUSG00000018707/ENSMUSG00000032118/ENSMUSG00000074657/ENSMUSG00000055407/ENSMUSG00000022055/ENSMUSG00000042766/ENSMUSG00000032589/ENSMUSG00000018395/ENSMUSG00000063801/…	25
104	Down	GO:0023051	regulation of signaling	382/1598	3586/21087	1.52E-13	1.16E-11	9.88E-12	ENSMUSG00000066392/ENSMUSG00000017737/ENSMUSG00000020099/ENSMUSG00000032336/ENSMUSG00000020891/ENSMUSG00000036585/ENSMUSG00000024277/ENSMUSG00000042429/ENSMUSG00000047507/ENSMUSG00000024524/ENSMUSG00000033208/ENSMUSG00000021684/ENSMUSG00000027895/ENSMUSG00000024186/ENSMUSG00000050148/ENSMUSG00000021708/ENSMUSG00000025407/ENSMUSG00000023064/ENSMUSG00000035953/ENSMUSG00000027223/ENSMUSG00000072214/…	382
105	Down	GO:0009987	cellular process	1349/1598	16313/21087	2.01E-13	1.50E-11	1.29E-11	ENSMUSG00000066392/ENSMUSG00000017737/ENSMUSG00000020099/ENSMUSG00000032336/ENSMUSG00000020891/ENSMUSG00000036585/ENSMUSG00000024277/ENSMUSG00000042429/ENSMUSG00000047507/ENSMUSG00000024524/ENSMUSG00000033208/ENSMUSG00000021684/ENSMUSG00000027895/ENSMUSG00000024186/ENSMUSG00000050148/ENSMUSG00000021708/ENSMUSG00000025407/ENSMUSG00000023064/ENSMUSG00000035953/ENSMUSG00000027223/ENSMUSG00000072214/…	1349
106	Down	GO:0051130	positive regulation of cellular component organization	164/1598	1225/21087	2.67E-13	1.98E-11	1.70E-11	ENSMUSG00000017737/ENSMUSG00000024277/ENSMUSG00000028546/ENSMUSG00000026825/ENSMUSG00000057897/ENSMUSG00000029167/ENSMUSG00000020366/ENSMUSG00000003575/ENSMUSG00000041670/ENSMUSG00000060780/ENSMUSG00000059146/ENSMUSG00000032537/ENSMUSG00000006435/ENSMUSG00000019997/ENSMUSG00000024777/ENSMUSG00000035863/ENSMUSG00000020886/ENSMUSG00000039953/ENSMUSG00000022812/ENSMUSG00000025499/ENSMUSG00000030731/…	164
107	Down	GO:0046903	secretion	166/1598	1246/21087	2.86E-13	2.11E-11	1.80E-11	ENSMUSG00000066392/ENSMUSG00000020891/ENSMUSG00000042429/ENSMUSG00000047507/ENSMUSG00000021684/ENSMUSG00000027895/ENSMUSG00000023064/ENSMUSG00000072214/ENSMUSG00000027584/ENSMUSG00000028542/ENSMUSG00000034997/ENSMUSG00000026797/ENSMUSG00000037012/ENSMUSG00000030209/ENSMUSG00000021816/ENSMUSG00000058441/ENSMUSG00000020366/ENSMUSG00000041670/ENSMUSG00000006435/ENSMUSG00000031840/ENSMUSG00000019997/…	166
108	Down	GO:0023061	signal release	119/1598	794/21087	3.83E-13	2.79E-11	2.39E-11	ENSMUSG00000066392/ENSMUSG00000020891/ENSMUSG00000042429/ENSMUSG00000047507/ENSMUSG00000021684/ENSMUSG00000027895/ENSMUSG00000023064/ENSMUSG00000072214/ENSMUSG00000028542/ENSMUSG00000034997/ENSMUSG00000026797/ENSMUSG00000037012/ENSMUSG00000021816/ENSMUSG00000058441/ENSMUSG00000020366/ENSMUSG00000041670/ENSMUSG00000031840/ENSMUSG00000023017/ENSMUSG00000027577/ENSMUSG00000022812/ENSMUSG00000022840/…	119
109	Down	GO:2000300	regulation of synaptic vesicle exocytosis	33/1598	103/21087	3.95E-13	2.86E-11	2.44E-11	ENSMUSG00000066392/ENSMUSG00000072214/ENSMUSG00000034997/ENSMUSG00000026797/ENSMUSG00000041670/ENSMUSG00000031840/ENSMUSG00000027577/ENSMUSG00000022812/ENSMUSG00000024743/ENSMUSG00000011877/ENSMUSG00000024127/ENSMUSG00000033615/ENSMUSG00000031144/ENSMUSG00000027438/ENSMUSG00000032890/ENSMUSG00000045038/ENSMUSG00000027805/ENSMUSG00000057531/ENSMUSG00000025867/ENSMUSG00000030519/ENSMUSG00000024897/…	33
110	Down	GO:0061025	membrane fusion	88/1598	516/21087	4.27E-13	3.06E-11	2.62E-11	ENSMUSG00000066392/ENSMUSG00000047507/ENSMUSG00000072214/ENSMUSG00000034997/ENSMUSG00000026797/ENSMUSG00000021816/ENSMUSG00000041670/ENSMUSG00000031840/ENSMUSG00000027577/ENSMUSG00000022812/ENSMUSG00000030731/ENSMUSG00000024743/ENSMUSG00000021567/ENSMUSG00000018634/ENSMUSG00000053046/ENSMUSG00000051343/ENSMUSG00000011877/ENSMUSG00000034730/ENSMUSG00000024127/ENSMUSG00000054459/ENSMUSG00000025793/…	88
111	Down	GO:0016358	dendrite development	61/1598	295/21087	4.33E-13	3.07E-11	2.63E-11	ENSMUSG00000028546/ENSMUSG00000022619/ENSMUSG00000050132/ENSMUSG00000048895/ENSMUSG00000057897/ENSMUSG00000003575/ENSMUSG00000032537/ENSMUSG00000006435/ENSMUSG00000059981/ENSMUSG00000035863/ENSMUSG00000020886/ENSMUSG00000022812/ENSMUSG00000022623/ENSMUSG00000028991/ENSMUSG00000023328/ENSMUSG00000042700/ENSMUSG00000011877/ENSMUSG00000006476/ENSMUSG00000055471/ENSMUSG00000027254/ENSMUSG00000042589/…	61
112	Down	GO:0099072	regulation of postsynaptic membrane neurotransmitter receptor levels	32/1598	98/21087	4.96E-13	3.49E-11	2.98E-11	ENSMUSG00000019146/ENSMUSG00000026825/ENSMUSG00000020886/ENSMUSG00000039953/ENSMUSG00000022812/ENSMUSG00000025499/ENSMUSG00000011877/ENSMUSG00000025582/ENSMUSG00000030098/ENSMUSG00000033615/ENSMUSG00000059991/ENSMUSG00000009894/ENSMUSG00000027273/ENSMUSG00000029126/ENSMUSG00000030805/ENSMUSG00000033389/ENSMUSG00000006930/ENSMUSG00000030806/ENSMUSG00000041115/ENSMUSG00000029053/ENSMUSG00000020894/…	32
113	Down	GO:0010646	regulation of cell communication	378/1598	3571/21087	5.43E-13	3.78E-11	3.23E-11	ENSMUSG00000066392/ENSMUSG00000017737/ENSMUSG00000020099/ENSMUSG00000032336/ENSMUSG00000020891/ENSMUSG00000036585/ENSMUSG00000024277/ENSMUSG00000042429/ENSMUSG00000047507/ENSMUSG00000024524/ENSMUSG00000033208/ENSMUSG00000021684/ENSMUSG00000027895/ENSMUSG00000024186/ENSMUSG00000050148/ENSMUSG00000021708/ENSMUSG00000025407/ENSMUSG00000023064/ENSMUSG00000035953/ENSMUSG00000027223/ENSMUSG00000072214/…	378
114	Down	GO:0022604	regulation of cell morphogenesis	89/1598	529/21087	6.90E-13	4.77E-11	4.08E-11	ENSMUSG00000033208/ENSMUSG00000050132/ENSMUSG00000048895/ENSMUSG00000057897/ENSMUSG00000020366/ENSMUSG00000041670/ENSMUSG00000059146/ENSMUSG00000059981/ENSMUSG00000035863/ENSMUSG00000020886/ENSMUSG00000022812/ENSMUSG00000030731/ENSMUSG00000038264/ENSMUSG00000022623/ENSMUSG00000053046/ENSMUSG00000023328/ENSMUSG00000033618/ENSMUSG00000042700/ENSMUSG00000035390/ENSMUSG00000006476/ENSMUSG00000026697/…	89
115	Down	GO:1903539	protein localization to postsynaptic membrane	25/1598	62/21087	7.69E-13	5.27E-11	4.51E-11	ENSMUSG00000019146/ENSMUSG00000020734/ENSMUSG00000020886/ENSMUSG00000039953/ENSMUSG00000022812/ENSMUSG00000025499/ENSMUSG00000011877/ENSMUSG00000025582/ENSMUSG00000030098/ENSMUSG00000033615/ENSMUSG00000059991/ENSMUSG00000009894/ENSMUSG00000027273/ENSMUSG00000029126/ENSMUSG00000030805/ENSMUSG00000033389/ENSMUSG00000030806/ENSMUSG00000041115/ENSMUSG00000029053/ENSMUSG00000026959/ENSMUSG00000020894/…	25
116	Down	GO:0010769	regulation of cell morphogenesis involved in differentiation	67/1598	346/21087	7.83E-13	5.32E-11	4.55E-11	ENSMUSG00000050132/ENSMUSG00000048895/ENSMUSG00000057897/ENSMUSG00000020366/ENSMUSG00000059146/ENSMUSG00000022812/ENSMUSG00000038264/ENSMUSG00000022623/ENSMUSG00000053046/ENSMUSG00000023328/ENSMUSG00000033618/ENSMUSG00000042700/ENSMUSG00000035390/ENSMUSG00000006476/ENSMUSG00000026697/ENSMUSG00000032011/ENSMUSG00000074238/ENSMUSG00000051149/ENSMUSG00000030110/ENSMUSG00000056486/ENSMUSG00000042589/…	67
117	Down	GO:0034762	regulation of transmembrane transport	94/1598	575/21087	8.64E-13	5.82E-11	4.98E-11	ENSMUSG00000017737/ENSMUSG00000027895/ENSMUSG00000021708/ENSMUSG00000027584/ENSMUSG00000022619/ENSMUSG00000037012/ENSMUSG00000019146/ENSMUSG00000029167/ENSMUSG00000027577/ENSMUSG00000020886/ENSMUSG00000021313/ENSMUSG00000022623/ENSMUSG00000018634/ENSMUSG00000028991/ENSMUSG00000032356/ENSMUSG00000032011/ENSMUSG00000028756/ENSMUSG00000024858/ENSMUSG00000024065/ENSMUSG00000029608/ENSMUSG00000061603/…	94
118	Down	GO:0071702	organic substance transport	312/1598	2838/21087	1.25E-12	8.30E-11	7.09E-11	ENSMUSG00000020891/ENSMUSG00000042429/ENSMUSG00000047507/ENSMUSG00000021684/ENSMUSG00000023064/ENSMUSG00000028542/ENSMUSG00000034997/ENSMUSG00000048895/ENSMUSG00000026797/ENSMUSG00000037012/ENSMUSG00000030209/ENSMUSG00000019146/ENSMUSG00000026825/ENSMUSG00000042249/ENSMUSG00000021816/ENSMUSG00000058441/ENSMUSG00000020366/ENSMUSG00000041670/ENSMUSG00000006435/ENSMUSG00000031840/ENSMUSG00000005469/…	312
119	Down	GO:0022607	cellular component assembly	319/1598	2917/21087	1.25E-12	8.30E-11	7.09E-11	ENSMUSG00000066392/ENSMUSG00000017737/ENSMUSG00000032336/ENSMUSG00000024277/ENSMUSG00000027895/ENSMUSG00000050148/ENSMUSG00000035953/ENSMUSG00000026797/ENSMUSG00000030209/ENSMUSG00000020366/ENSMUSG00000032601/ENSMUSG00000003575/ENSMUSG00000041670/ENSMUSG00000060780/ENSMUSG00000059146/ENSMUSG00000032537/ENSMUSG00000006435/ENSMUSG00000031840/ENSMUSG00000019997/ENSMUSG00000059981/ENSMUSG00000005469/…	319
120	Down	GO:0046907	intracellular transport	202/1598	1639/21087	1.27E-12	8.33E-11	7.12E-11	ENSMUSG00000042429/ENSMUSG00000047507/ENSMUSG00000048895/ENSMUSG00000026797/ENSMUSG00000019146/ENSMUSG00000042249/ENSMUSG00000041670/ENSMUSG00000006435/ENSMUSG00000031840/ENSMUSG00000005469/ENSMUSG00000034557/ENSMUSG00000022812/ENSMUSG00000025499/ENSMUSG00000029223/ENSMUSG00000024743/ENSMUSG00000020657/ENSMUSG00000018634/ENSMUSG00000021974/ENSMUSG00000020802/ENSMUSG00000033862/ENSMUSG00000028756/…	202
121	Down	GO:0007275	multicellular organism development	528/1598	5377/21087	1.41E-12	9.18E-11	7.85E-11	ENSMUSG00000066392/ENSMUSG00000017737/ENSMUSG00000020099/ENSMUSG00000032336/ENSMUSG00000020891/ENSMUSG00000036585/ENSMUSG00000033208/ENSMUSG00000025407/ENSMUSG00000028546/ENSMUSG00000022619/ENSMUSG00000017897/ENSMUSG00000050132/ENSMUSG00000048895/ENSMUSG00000026797/ENSMUSG00000019428/ENSMUSG00000030209/ENSMUSG00000057897/ENSMUSG00000021816/ENSMUSG00000025151/ENSMUSG00000029167/ENSMUSG00000020366/…	528
122	Down	GO:0050769	positive regulation of neurogenesis	95/1598	590/21087	1.61E-12	1.04E-10	8.90E-11	ENSMUSG00000028546/ENSMUSG00000057897/ENSMUSG00000003575/ENSMUSG00000041670/ENSMUSG00000059146/ENSMUSG00000006435/ENSMUSG00000024777/ENSMUSG00000035863/ENSMUSG00000020886/ENSMUSG00000022812/ENSMUSG00000030731/ENSMUSG00000038264/ENSMUSG00000022623/ENSMUSG00000028991/ENSMUSG00000008734/ENSMUSG00000023328/ENSMUSG00000033618/ENSMUSG00000006476/ENSMUSG00000090223/ENSMUSG00000055471/ENSMUSG00000051149/…	95
123	Down	GO:0099637	neurotransmitter receptor transport	25/1598	64/21087	1.80E-12	1.16E-10	9.88E-11	ENSMUSG00000019146/ENSMUSG00000026825/ENSMUSG00000039953/ENSMUSG00000030098/ENSMUSG00000033615/ENSMUSG00000009894/ENSMUSG00000027273/ENSMUSG00000029126/ENSMUSG00000030805/ENSMUSG00000033389/ENSMUSG00000006930/ENSMUSG00000030806/ENSMUSG00000020894/ENSMUSG00000022602/ENSMUSG00000028785/ENSMUSG00000020198/ENSMUSG00000031153/ENSMUSG00000040276/ENSMUSG00000034902/ENSMUSG00000022841/ENSMUSG00000074657/…	25
124	Down	GO:0006813	potassium ion transport	52/1598	237/21087	2.15E-12	1.37E-10	1.17E-10	ENSMUSG00000042429/ENSMUSG00000027895/ENSMUSG00000034997/ENSMUSG00000061603/ENSMUSG00000096146/ENSMUSG00000034187/ENSMUSG00000040136/ENSMUSG00000050556/ENSMUSG00000040724/ENSMUSG00000028854/ENSMUSG00000027030/ENSMUSG00000028631/ENSMUSG00000029361/ENSMUSG00000062785/ENSMUSG00000020894/ENSMUSG00000037989/ENSMUSG00000043673/ENSMUSG00000037578/ENSMUSG00000069601/ENSMUSG00000052374/ENSMUSG00000017740/…	52
125	Down	GO:0072384	organelle transport along microtubule	28/1598	81/21087	2.91E-12	1.83E-10	1.57E-10	ENSMUSG00000029223/ENSMUSG00000024873/ENSMUSG00000057531/ENSMUSG00000040687/ENSMUSG00000006930/ENSMUSG00000029053/ENSMUSG00000020396/ENSMUSG00000028975/ENSMUSG00000037351/ENSMUSG00000020198/ENSMUSG00000018736/ENSMUSG00000015222/ENSMUSG00000025733/ENSMUSG00000018707/ENSMUSG00000032118/ENSMUSG00000074657/ENSMUSG00000052727/ENSMUSG00000055407/ENSMUSG00000022055/ENSMUSG00000042766/ENSMUSG00000041609/…	28
126	Down	GO:0099565	chemical synaptic transmission, postsynaptic	33/1598	110/21087	3.10E-12	1.94E-10	1.66E-10	ENSMUSG00000042429/ENSMUSG00000022619/ENSMUSG00000030209/ENSMUSG00000020734/ENSMUSG00000041670/ENSMUSG00000027577/ENSMUSG00000020886/ENSMUSG00000017314/ENSMUSG00000022812/ENSMUSG00000022623/ENSMUSG00000031654/ENSMUSG00000025582/ENSMUSG00000024858/ENSMUSG00000030098/ENSMUSG00000000263/ENSMUSG00000059991/ENSMUSG00000042589/ENSMUSG00000028161/ENSMUSG00000000632/ENSMUSG00000024873/ENSMUSG00000051790/…	33
127	Down	GO:0007612	learning	42/1598	170/21087	4.83E-12	3.00E-10	2.56E-10	ENSMUSG00000021684/ENSMUSG00000027584/ENSMUSG00000028546/ENSMUSG00000022619/ENSMUSG00000030209/ENSMUSG00000023017/ENSMUSG00000022623/ENSMUSG00000018634/ENSMUSG00000028991/ENSMUSG00000035390/ENSMUSG00000027254/ENSMUSG00000059991/ENSMUSG00000030310/ENSMUSG00000027273/ENSMUSG00000040136/ENSMUSG00000074923/ENSMUSG00000025318/ENSMUSG00000079055/ENSMUSG00000030043/ENSMUSG00000063434/ENSMUSG00000036564/…	42
128	Down	GO:0032412	regulation of ion transmembrane transporter activity	54/1598	258/21087	5.81E-12	3.58E-10	3.06E-10	ENSMUSG00000017737/ENSMUSG00000021708/ENSMUSG00000027584/ENSMUSG00000022619/ENSMUSG00000037012/ENSMUSG00000019146/ENSMUSG00000029167/ENSMUSG00000027577/ENSMUSG00000020886/ENSMUSG00000021313/ENSMUSG00000022623/ENSMUSG00000018634/ENSMUSG00000032356/ENSMUSG00000028756/ENSMUSG00000024065/ENSMUSG00000029608/ENSMUSG00000061603/ENSMUSG00000096146/ENSMUSG00000024873/ENSMUSG00000051790/ENSMUSG00000049422/…	54
129	Down	GO:0022898	regulation of transmembrane transporter activity	55/1598	266/21087	6.15E-12	3.76E-10	3.21E-10	ENSMUSG00000017737/ENSMUSG00000021708/ENSMUSG00000027584/ENSMUSG00000022619/ENSMUSG00000037012/ENSMUSG00000019146/ENSMUSG00000029167/ENSMUSG00000027577/ENSMUSG00000020886/ENSMUSG00000021313/ENSMUSG00000022623/ENSMUSG00000018634/ENSMUSG00000032356/ENSMUSG00000028756/ENSMUSG00000024065/ENSMUSG00000029608/ENSMUSG00000061603/ENSMUSG00000096146/ENSMUSG00000024873/ENSMUSG00000051790/ENSMUSG00000049422/…	55
130	Down	GO:0010720	positive regulation of cell development	102/1598	670/21087	7.72E-12	4.68E-10	4.00E-10	ENSMUSG00000028546/ENSMUSG00000057897/ENSMUSG00000020366/ENSMUSG00000003575/ENSMUSG00000041670/ENSMUSG00000059146/ENSMUSG00000006435/ENSMUSG00000024777/ENSMUSG00000035863/ENSMUSG00000020886/ENSMUSG00000022812/ENSMUSG00000030731/ENSMUSG00000038264/ENSMUSG00000022623/ENSMUSG00000028991/ENSMUSG00000008734/ENSMUSG00000023328/ENSMUSG00000033618/ENSMUSG00000006476/ENSMUSG00000026697/ENSMUSG00000090223/…	102
131	Down	GO:0097120	receptor localization to synapse	26/1598	73/21087	7.92E-12	4.76E-10	4.07E-10	ENSMUSG00000032336/ENSMUSG00000019146/ENSMUSG00000020886/ENSMUSG00000039953/ENSMUSG00000022812/ENSMUSG00000025499/ENSMUSG00000011877/ENSMUSG00000025582/ENSMUSG00000030098/ENSMUSG00000033615/ENSMUSG00000059991/ENSMUSG00000009894/ENSMUSG00000024873/ENSMUSG00000027273/ENSMUSG00000029126/ENSMUSG00000030805/ENSMUSG00000033389/ENSMUSG00000030806/ENSMUSG00000041115/ENSMUSG00000029053/ENSMUSG00000020894/…	26
132	Down	GO:0007611	learning or memory	58/1598	291/21087	8.01E-12	4.78E-10	4.09E-10	ENSMUSG00000033208/ENSMUSG00000021684/ENSMUSG00000027584/ENSMUSG00000028546/ENSMUSG00000022619/ENSMUSG00000034997/ENSMUSG00000030209/ENSMUSG00000003575/ENSMUSG00000023017/ENSMUSG00000000552/ENSMUSG00000022623/ENSMUSG00000018634/ENSMUSG00000028991/ENSMUSG00000035390/ENSMUSG00000025855/ENSMUSG00000051149/ENSMUSG00000027254/ENSMUSG00000059991/ENSMUSG00000042589/ENSMUSG00000030310/ENSMUSG00000049551/…	58
133	Down	GO:0032409	regulation of transporter activity	56/1598	276/21087	8.75E-12	5.17E-10	4.42E-10	ENSMUSG00000017737/ENSMUSG00000021708/ENSMUSG00000027584/ENSMUSG00000022619/ENSMUSG00000037012/ENSMUSG00000019146/ENSMUSG00000029167/ENSMUSG00000027577/ENSMUSG00000020886/ENSMUSG00000021313/ENSMUSG00000022623/ENSMUSG00000018634/ENSMUSG00000032356/ENSMUSG00000028756/ENSMUSG00000024065/ENSMUSG00000029608/ENSMUSG00000061603/ENSMUSG00000096146/ENSMUSG00000024873/ENSMUSG00000051790/ENSMUSG00000049422/…	56
134	Down	GO:0071805	potassium ion transmembrane transport	45/1598	194/21087	8.79E-12	5.17E-10	4.42E-10	ENSMUSG00000027895/ENSMUSG00000061603/ENSMUSG00000096146/ENSMUSG00000040136/ENSMUSG00000050556/ENSMUSG00000040724/ENSMUSG00000028854/ENSMUSG00000027030/ENSMUSG00000028631/ENSMUSG00000062785/ENSMUSG00000020894/ENSMUSG00000037989/ENSMUSG00000043673/ENSMUSG00000037578/ENSMUSG00000069601/ENSMUSG00000052374/ENSMUSG00000017740/ENSMUSG00000028931/ENSMUSG00000063142/ENSMUSG00000047976/ENSMUSG00000009731/…	45
135	Down	GO:2001257	regulation of cation channel activity	42/1598	173/21087	8.94E-12	5.22E-10	4.46E-10	ENSMUSG00000017737/ENSMUSG00000021708/ENSMUSG00000027584/ENSMUSG00000022619/ENSMUSG00000019146/ENSMUSG00000029167/ENSMUSG00000027577/ENSMUSG00000020886/ENSMUSG00000022623/ENSMUSG00000018634/ENSMUSG00000032356/ENSMUSG00000028756/ENSMUSG00000024065/ENSMUSG00000029608/ENSMUSG00000061603/ENSMUSG00000096146/ENSMUSG00000024873/ENSMUSG00000051790/ENSMUSG00000020635/ENSMUSG00000040136/ENSMUSG00000025318/…	42
136	Down	GO:0050890	cognition	62/1598	325/21087	1.09E-11	6.34E-10	5.42E-10	ENSMUSG00000042429/ENSMUSG00000033208/ENSMUSG00000021684/ENSMUSG00000027584/ENSMUSG00000028546/ENSMUSG00000022619/ENSMUSG00000034997/ENSMUSG00000030209/ENSMUSG00000003575/ENSMUSG00000023017/ENSMUSG00000027577/ENSMUSG00000000552/ENSMUSG00000022623/ENSMUSG00000018634/ENSMUSG00000028991/ENSMUSG00000035390/ENSMUSG00000025855/ENSMUSG00000051149/ENSMUSG00000027254/ENSMUSG00000059991/ENSMUSG00000042589/…	62
137	Down	GO:1990778	protein localization to cell periphery	66/1598	358/21087	1.16E-11	6.68E-10	5.71E-10	ENSMUSG00000026797/ENSMUSG00000019146/ENSMUSG00000057897/ENSMUSG00000020734/ENSMUSG00000031840/ENSMUSG00000035863/ENSMUSG00000020886/ENSMUSG00000039953/ENSMUSG00000022812/ENSMUSG00000025499/ENSMUSG00000021567/ENSMUSG00000045377/ENSMUSG00000011877/ENSMUSG00000025582/ENSMUSG00000024127/ENSMUSG00000024065/ENSMUSG00000030098/ENSMUSG00000033615/ENSMUSG00000096146/ENSMUSG00000059991/ENSMUSG00000009894/…	66
138	Down	GO:0045333	cellular respiration	41/1598	168/21087	1.32E-11	7.53E-10	6.44E-10	ENSMUSG00000029167/ENSMUSG00000005469/ENSMUSG00000078566/ENSMUSG00000028756/ENSMUSG00000006818/ENSMUSG00000059734/ENSMUSG00000003072/ENSMUSG00000091780/ENSMUSG00000026260/ENSMUSG00000025204/ENSMUSG00000022354/ENSMUSG00000025825/ENSMUSG00000071014/ENSMUSG00000020153/ENSMUSG00000064351/ENSMUSG00000000384/ENSMUSG00000064367/ENSMUSG00000000088/ENSMUSG00000024099/ENSMUSG00000041697/ENSMUSG00000021577/…	41
139	Down	GO:1902600	proton transmembrane transport	42/1598	176/21087	1.63E-11	9.23E-10	7.89E-10	ENSMUSG00000028756/ENSMUSG00000049422/ENSMUSG00000028854/ENSMUSG00000059734/ENSMUSG00000003072/ENSMUSG00000028982/ENSMUSG00000031633/ENSMUSG00000006057/ENSMUSG00000024151/ENSMUSG00000025393/ENSMUSG00000026260/ENSMUSG00000025204/ENSMUSG00000022354/ENSMUSG00000018770/ENSMUSG00000025825/ENSMUSG00000071014/ENSMUSG00000040907/ENSMUSG00000020153/ENSMUSG00000050856/ENSMUSG00000064351/ENSMUSG00000022956/…	42
140	Down	GO:1904062	regulation of cation transmembrane transport	65/1598	354/21087	2.00E-11	1.12E-09	9.61E-10	ENSMUSG00000017737/ENSMUSG00000021708/ENSMUSG00000027584/ENSMUSG00000022619/ENSMUSG00000019146/ENSMUSG00000029167/ENSMUSG00000027577/ENSMUSG00000020886/ENSMUSG00000021313/ENSMUSG00000022623/ENSMUSG00000018634/ENSMUSG00000032356/ENSMUSG00000032011/ENSMUSG00000028756/ENSMUSG00000024065/ENSMUSG00000029608/ENSMUSG00000061603/ENSMUSG00000096146/ENSMUSG00000024873/ENSMUSG00000051790/ENSMUSG00000045038/…	65
141	Down	GO:0044085	cellular component biogenesis	332/1598	3136/21087	2.37E-11	1.32E-09	1.13E-09	ENSMUSG00000066392/ENSMUSG00000017737/ENSMUSG00000032336/ENSMUSG00000024277/ENSMUSG00000027895/ENSMUSG00000050148/ENSMUSG00000035953/ENSMUSG00000026797/ENSMUSG00000030209/ENSMUSG00000020366/ENSMUSG00000032601/ENSMUSG00000003575/ENSMUSG00000041670/ENSMUSG00000060780/ENSMUSG00000059146/ENSMUSG00000032537/ENSMUSG00000006435/ENSMUSG00000031840/ENSMUSG00000019997/ENSMUSG00000059981/ENSMUSG00000005469/…	332
142	Down	GO:0022900	electron transport chain	29/1598	94/21087	2.96E-11	1.64E-09	1.41E-09	ENSMUSG00000029167/ENSMUSG00000028756/ENSMUSG00000049422/ENSMUSG00000006818/ENSMUSG00000059734/ENSMUSG00000091780/ENSMUSG00000026260/ENSMUSG00000025204/ENSMUSG00000022354/ENSMUSG00000025825/ENSMUSG00000071014/ENSMUSG00000064351/ENSMUSG00000064367/ENSMUSG00000000088/ENSMUSG00000024099/ENSMUSG00000041697/ENSMUSG00000021577/ENSMUSG00000022551/ENSMUSG00000024038/ENSMUSG00000037916/ENSMUSG00000031818/…	29
143	Down	GO:0015980	energy derivation by oxidation of organic compounds	53/1598	262/21087	3.55E-11	1.96E-09	1.67E-09	ENSMUSG00000033208/ENSMUSG00000029167/ENSMUSG00000005469/ENSMUSG00000022812/ENSMUSG00000078566/ENSMUSG00000028991/ENSMUSG00000028756/ENSMUSG00000057177/ENSMUSG00000006818/ENSMUSG00000020176/ENSMUSG00000050541/ENSMUSG00000059734/ENSMUSG00000025579/ENSMUSG00000003072/ENSMUSG00000038028/ENSMUSG00000021255/ENSMUSG00000091780/ENSMUSG00000026260/ENSMUSG00000025204/ENSMUSG00000022354/ENSMUSG00000025825/…	53
144	Down	GO:0022904	respiratory electron transport chain	27/1598	83/21087	3.58E-11	1.96E-09	1.68E-09	ENSMUSG00000029167/ENSMUSG00000028756/ENSMUSG00000006818/ENSMUSG00000059734/ENSMUSG00000091780/ENSMUSG00000026260/ENSMUSG00000025204/ENSMUSG00000022354/ENSMUSG00000025825/ENSMUSG00000071014/ENSMUSG00000064351/ENSMUSG00000064367/ENSMUSG00000000088/ENSMUSG00000024099/ENSMUSG00000041697/ENSMUSG00000021577/ENSMUSG00000022551/ENSMUSG00000024038/ENSMUSG00000037916/ENSMUSG00000031818/ENSMUSG00000038462/…	27
145	Down	GO:0017156	calcium-ion regulated exocytosis	25/1598	72/21087	3.79E-11	2.06E-09	1.76E-09	ENSMUSG00000047507/ENSMUSG00000026797/ENSMUSG00000021816/ENSMUSG00000041670/ENSMUSG00000031840/ENSMUSG00000030731/ENSMUSG00000024743/ENSMUSG00000040722/ENSMUSG00000032890/ENSMUSG00000027273/ENSMUSG00000050556/ENSMUSG00000030806/ENSMUSG00000027220/ENSMUSG00000026452/ENSMUSG00000020894/ENSMUSG00000034656/ENSMUSG00000035226/ENSMUSG00000009394/ENSMUSG00000090071/ENSMUSG00000051331/ENSMUSG00000052301/…	25
146	Down	GO:1903530	regulation of secretion by cell	119/1598	851/21087	4.03E-11	2.18E-09	1.86E-09	ENSMUSG00000066392/ENSMUSG00000020891/ENSMUSG00000042429/ENSMUSG00000047507/ENSMUSG00000021684/ENSMUSG00000027895/ENSMUSG00000023064/ENSMUSG00000072214/ENSMUSG00000034997/ENSMUSG00000026797/ENSMUSG00000037012/ENSMUSG00000030209/ENSMUSG00000021816/ENSMUSG00000058441/ENSMUSG00000020366/ENSMUSG00000041670/ENSMUSG00000031840/ENSMUSG00000023017/ENSMUSG00000027577/ENSMUSG00000022812/ENSMUSG00000022840/…	119
147	Down	GO:0031644	regulation of nervous system process	41/1598	174/21087	4.34E-11	2.33E-09	1.99E-09	ENSMUSG00000042429/ENSMUSG00000033208/ENSMUSG00000027895/ENSMUSG00000027584/ENSMUSG00000041670/ENSMUSG00000027577/ENSMUSG00000020886/ENSMUSG00000022812/ENSMUSG00000022623/ENSMUSG00000028991/ENSMUSG00000031654/ENSMUSG00000019828/ENSMUSG00000025582/ENSMUSG00000030669/ENSMUSG00000047632/ENSMUSG00000024858/ENSMUSG00000030098/ENSMUSG00000000263/ENSMUSG00000059991/ENSMUSG00000042589/ENSMUSG00000024873/…	41
148	Down	GO:0006091	generation of precursor metabolites and energy	69/1598	394/21087	4.45E-11	2.37E-09	2.03E-09	ENSMUSG00000033208/ENSMUSG00000034997/ENSMUSG00000037012/ENSMUSG00000029167/ENSMUSG00000005469/ENSMUSG00000022812/ENSMUSG00000078566/ENSMUSG00000028991/ENSMUSG00000028756/ENSMUSG00000037428/ENSMUSG00000049422/ENSMUSG00000057177/ENSMUSG00000006818/ENSMUSG00000020176/ENSMUSG00000050541/ENSMUSG00000035011/ENSMUSG00000059734/ENSMUSG00000025579/ENSMUSG00000003072/ENSMUSG00000032294/ENSMUSG00000028982/…	69
149	Down	GO:0060078	regulation of postsynaptic membrane potential	32/1598	114/21087	4.64E-11	2.46E-09	2.10E-09	ENSMUSG00000042429/ENSMUSG00000022619/ENSMUSG00000030209/ENSMUSG00000020734/ENSMUSG00000041670/ENSMUSG00000027577/ENSMUSG00000020886/ENSMUSG00000017314/ENSMUSG00000022812/ENSMUSG00000022623/ENSMUSG00000031654/ENSMUSG00000024858/ENSMUSG00000030098/ENSMUSG00000000263/ENSMUSG00000042589/ENSMUSG00000028161/ENSMUSG00000000632/ENSMUSG00000051790/ENSMUSG00000040867/ENSMUSG00000030806/ENSMUSG00000003378/…	32
150	Down	GO:0071705	nitrogen compound transport	271/1598	2461/21087	4.75E-11	2.49E-09	2.13E-09	ENSMUSG00000020891/ENSMUSG00000042429/ENSMUSG00000047507/ENSMUSG00000021684/ENSMUSG00000023064/ENSMUSG00000028542/ENSMUSG00000034997/ENSMUSG00000048895/ENSMUSG00000026797/ENSMUSG00000037012/ENSMUSG00000030209/ENSMUSG00000019146/ENSMUSG00000026825/ENSMUSG00000042249/ENSMUSG00000021816/ENSMUSG00000058441/ENSMUSG00000041670/ENSMUSG00000006435/ENSMUSG00000031840/ENSMUSG00000005469/ENSMUSG00000027577/…	271
151	Down	GO:0051239	regulation of multicellular organismal process	343/1598	3290/21087	6.75E-11	3.52E-09	3.01E-09	ENSMUSG00000017737/ENSMUSG00000032336/ENSMUSG00000020891/ENSMUSG00000036585/ENSMUSG00000024277/ENSMUSG00000042429/ENSMUSG00000033208/ENSMUSG00000027895/ENSMUSG00000025407/ENSMUSG00000027584/ENSMUSG00000031748/ENSMUSG00000028546/ENSMUSG00000050132/ENSMUSG00000034997/ENSMUSG00000048895/ENSMUSG00000037012/ENSMUSG00000057897/ENSMUSG00000025151/ENSMUSG00000029167/ENSMUSG00000058441/ENSMUSG00000020366/…	343
152	Down	GO:0045595	regulation of cell differentiation	222/1598	1928/21087	6.87E-11	3.56E-09	3.04E-09	ENSMUSG00000017737/ENSMUSG00000020891/ENSMUSG00000033208/ENSMUSG00000025407/ENSMUSG00000028546/ENSMUSG00000050132/ENSMUSG00000034997/ENSMUSG00000048895/ENSMUSG00000057897/ENSMUSG00000020366/ENSMUSG00000003575/ENSMUSG00000041670/ENSMUSG00000005045/ENSMUSG00000059146/ENSMUSG00000032537/ENSMUSG00000006435/ENSMUSG00000019997/ENSMUSG00000005469/ENSMUSG00000024777/ENSMUSG00000035863/ENSMUSG00000020886/…	222
153	Down	GO:0006793	phosphorus metabolic process	313/1598	2951/21087	8.64E-11	4.45E-09	3.80E-09	ENSMUSG00000017737/ENSMUSG00000036585/ENSMUSG00000042429/ENSMUSG00000035953/ENSMUSG00000027223/ENSMUSG00000022619/ENSMUSG00000017897/ENSMUSG00000034997/ENSMUSG00000048895/ENSMUSG00000000296/ENSMUSG00000037012/ENSMUSG00000019428/ENSMUSG00000030209/ENSMUSG00000057897/ENSMUSG00000042249/ENSMUSG00000021816/ENSMUSG00000025151/ENSMUSG00000029167/ENSMUSG00000020366/ENSMUSG00000032601/ENSMUSG00000059146/…	313
154	Down	GO:0051046	regulation of secretion	125/1598	926/21087	1.32E-10	6.75E-09	5.77E-09	ENSMUSG00000066392/ENSMUSG00000020891/ENSMUSG00000042429/ENSMUSG00000047507/ENSMUSG00000021684/ENSMUSG00000027895/ENSMUSG00000023064/ENSMUSG00000072214/ENSMUSG00000027584/ENSMUSG00000034997/ENSMUSG00000026797/ENSMUSG00000037012/ENSMUSG00000030209/ENSMUSG00000021816/ENSMUSG00000058441/ENSMUSG00000020366/ENSMUSG00000041670/ENSMUSG00000031840/ENSMUSG00000023017/ENSMUSG00000027577/ENSMUSG00000022812/…	125
155	Down	GO:0006796	phosphate-containing compound metabolic process	310/1598	2929/21087	1.40E-10	7.13E-09	6.09E-09	ENSMUSG00000017737/ENSMUSG00000036585/ENSMUSG00000042429/ENSMUSG00000035953/ENSMUSG00000027223/ENSMUSG00000022619/ENSMUSG00000017897/ENSMUSG00000034997/ENSMUSG00000048895/ENSMUSG00000000296/ENSMUSG00000037012/ENSMUSG00000019428/ENSMUSG00000030209/ENSMUSG00000057897/ENSMUSG00000042249/ENSMUSG00000021816/ENSMUSG00000025151/ENSMUSG00000029167/ENSMUSG00000020366/ENSMUSG00000032601/ENSMUSG00000059146/…	310
156	Down	GO:0006754	ATP biosynthetic process	35/1598	139/21087	1.62E-10	8.17E-09	6.99E-09	ENSMUSG00000029167/ENSMUSG00000028756/ENSMUSG00000049422/ENSMUSG00000059734/ENSMUSG00000003072/ENSMUSG00000032294/ENSMUSG00000028982/ENSMUSG00000006057/ENSMUSG00000024151/ENSMUSG00000025393/ENSMUSG00000026260/ENSMUSG00000025204/ENSMUSG00000022354/ENSMUSG00000018770/ENSMUSG00000025825/ENSMUSG00000071014/ENSMUSG00000050856/ENSMUSG00000038690/ENSMUSG00000064351/ENSMUSG00000022956/ENSMUSG00000000563/…	35
157	Down	GO:0060079	excitatory postsynaptic potential	27/1598	88/21087	1.63E-10	8.17E-09	6.99E-09	ENSMUSG00000042429/ENSMUSG00000022619/ENSMUSG00000030209/ENSMUSG00000020734/ENSMUSG00000041670/ENSMUSG00000027577/ENSMUSG00000020886/ENSMUSG00000017314/ENSMUSG00000022812/ENSMUSG00000022623/ENSMUSG00000031654/ENSMUSG00000024858/ENSMUSG00000030098/ENSMUSG00000042589/ENSMUSG00000028161/ENSMUSG00000000632/ENSMUSG00000051790/ENSMUSG00000040867/ENSMUSG00000030806/ENSMUSG00000003378/ENSMUSG00000029053/…	27
158	Down	GO:0046034	ATP metabolic process	49/1598	243/21087	2.18E-10	1.09E-08	9.29E-09	ENSMUSG00000034997/ENSMUSG00000037012/ENSMUSG00000029167/ENSMUSG00000028756/ENSMUSG00000049422/ENSMUSG00000054428/ENSMUSG00000035011/ENSMUSG00000059734/ENSMUSG00000003072/ENSMUSG00000032294/ENSMUSG00000028982/ENSMUSG00000038028/ENSMUSG00000006057/ENSMUSG00000021255/ENSMUSG00000024151/ENSMUSG00000025393/ENSMUSG00000026260/ENSMUSG00000025204/ENSMUSG00000022354/ENSMUSG00000018770/ENSMUSG00000025825/…	49
159	Down	GO:0050770	regulation of axonogenesis	44/1598	206/21087	2.64E-10	1.31E-08	1.12E-08	ENSMUSG00000048895/ENSMUSG00000059146/ENSMUSG00000022812/ENSMUSG00000038264/ENSMUSG00000053046/ENSMUSG00000023328/ENSMUSG00000033618/ENSMUSG00000042700/ENSMUSG00000035390/ENSMUSG00000032011/ENSMUSG00000051149/ENSMUSG00000030110/ENSMUSG00000056486/ENSMUSG00000029512/ENSMUSG00000022883/ENSMUSG00000058230/ENSMUSG00000026959/ENSMUSG00000028519/ENSMUSG00000062991/ENSMUSG00000023951/ENSMUSG00000034656/…	44
160	Down	GO:0009152	purine ribonucleotide biosynthetic process	48/1598	237/21087	2.84E-10	1.39E-08	1.18E-08	ENSMUSG00000029167/ENSMUSG00000022840/ENSMUSG00000005580/ENSMUSG00000028756/ENSMUSG00000038967/ENSMUSG00000049422/ENSMUSG00000029361/ENSMUSG00000020431/ENSMUSG00000059734/ENSMUSG00000028785/ENSMUSG00000003072/ENSMUSG00000032294/ENSMUSG00000028982/ENSMUSG00000006057/ENSMUSG00000024151/ENSMUSG00000025630/ENSMUSG00000025393/ENSMUSG00000020333/ENSMUSG00000026260/ENSMUSG00000025204/ENSMUSG00000022354/…	48
161	Down	GO:0015985	energy coupled proton transport, down electrochemical gradient	31/1598	115/21087	2.85E-10	1.39E-08	1.18E-08	ENSMUSG00000028756/ENSMUSG00000049422/ENSMUSG00000059734/ENSMUSG00000003072/ENSMUSG00000028982/ENSMUSG00000006057/ENSMUSG00000024151/ENSMUSG00000025393/ENSMUSG00000026260/ENSMUSG00000025204/ENSMUSG00000022354/ENSMUSG00000018770/ENSMUSG00000025825/ENSMUSG00000071014/ENSMUSG00000050856/ENSMUSG00000064351/ENSMUSG00000022956/ENSMUSG00000000563/ENSMUSG00000064367/ENSMUSG00000000088/ENSMUSG00000024099/…	31
162	Down	GO:0015986	ATP synthesis coupled proton transport	31/1598	115/21087	2.85E-10	1.39E-08	1.18E-08	ENSMUSG00000028756/ENSMUSG00000049422/ENSMUSG00000059734/ENSMUSG00000003072/ENSMUSG00000028982/ENSMUSG00000006057/ENSMUSG00000024151/ENSMUSG00000025393/ENSMUSG00000026260/ENSMUSG00000025204/ENSMUSG00000022354/ENSMUSG00000018770/ENSMUSG00000025825/ENSMUSG00000071014/ENSMUSG00000050856/ENSMUSG00000064351/ENSMUSG00000022956/ENSMUSG00000000563/ENSMUSG00000064367/ENSMUSG00000000088/ENSMUSG00000024099/…	31
163	Down	GO:0098969	neurotransmitter receptor transport to postsynaptic membrane	13/1598	21/21087	2.96E-10	1.43E-08	1.23E-08	ENSMUSG00000039953/ENSMUSG00000030098/ENSMUSG00000033615/ENSMUSG00000009894/ENSMUSG00000027273/ENSMUSG00000029126/ENSMUSG00000030805/ENSMUSG00000033389/ENSMUSG00000030806/ENSMUSG00000020894/ENSMUSG00000031153/ENSMUSG00000034813/ENSMUSG00000046709	13
164	Down	GO:0009206	purine ribonucleoside triphosphate biosynthetic process	36/1598	149/21087	3.12E-10	1.50E-08	1.28E-08	ENSMUSG00000029167/ENSMUSG00000028756/ENSMUSG00000049422/ENSMUSG00000059734/ENSMUSG00000003072/ENSMUSG00000032294/ENSMUSG00000028982/ENSMUSG00000006057/ENSMUSG00000024151/ENSMUSG00000025393/ENSMUSG00000026260/ENSMUSG00000025204/ENSMUSG00000022354/ENSMUSG00000018770/ENSMUSG00000025825/ENSMUSG00000071014/ENSMUSG00000050856/ENSMUSG00000038690/ENSMUSG00000064351/ENSMUSG00000022956/ENSMUSG00000000563/…	36
165	Down	GO:0009145	purine nucleoside triphosphate biosynthetic process	36/1598	150/21087	3.80E-10	1.82E-08	1.55E-08	ENSMUSG00000029167/ENSMUSG00000028756/ENSMUSG00000049422/ENSMUSG00000059734/ENSMUSG00000003072/ENSMUSG00000032294/ENSMUSG00000028982/ENSMUSG00000006057/ENSMUSG00000024151/ENSMUSG00000025393/ENSMUSG00000026260/ENSMUSG00000025204/ENSMUSG00000022354/ENSMUSG00000018770/ENSMUSG00000025825/ENSMUSG00000071014/ENSMUSG00000050856/ENSMUSG00000038690/ENSMUSG00000064351/ENSMUSG00000022956/ENSMUSG00000000563/…	36
166	Down	GO:0007010	cytoskeleton organization	178/1598	1489/21087	3.90E-10	1.85E-08	1.58E-08	ENSMUSG00000024277/ENSMUSG00000048895/ENSMUSG00000059146/ENSMUSG00000006435/ENSMUSG00000019997/ENSMUSG00000059981/ENSMUSG00000035863/ENSMUSG00000040797/ENSMUSG00000022812/ENSMUSG00000025499/ENSMUSG00000020135/ENSMUSG00000022623/ENSMUSG00000029673/ENSMUSG00000028991/ENSMUSG00000053046/ENSMUSG00000030583/ENSMUSG00000042700/ENSMUSG00000035390/ENSMUSG00000033862/ENSMUSG00000034730/ENSMUSG00000026697/…	178
167	Down	GO:0050806	positive regulation of synaptic transmission	62/1598	355/21087	4.82E-10	2.28E-08	1.95E-08	ENSMUSG00000042429/ENSMUSG00000047507/ENSMUSG00000033208/ENSMUSG00000021708/ENSMUSG00000026797/ENSMUSG00000030209/ENSMUSG00000019146/ENSMUSG00000057897/ENSMUSG00000003657/ENSMUSG00000020734/ENSMUSG00000003575/ENSMUSG00000041670/ENSMUSG00000060780/ENSMUSG00000031840/ENSMUSG00000020886/ENSMUSG00000039953/ENSMUSG00000017314/ENSMUSG00000022812/ENSMUSG00000024743/ENSMUSG00000022623/ENSMUSG00000018634/…	62
168	Down	GO:0007416	synapse assembly	40/1598	180/21087	4.93E-10	2.31E-08	1.98E-08	ENSMUSG00000066392/ENSMUSG00000032336/ENSMUSG00000060780/ENSMUSG00000059146/ENSMUSG00000032537/ENSMUSG00000039953/ENSMUSG00000022623/ENSMUSG00000023328/ENSMUSG00000042700/ENSMUSG00000031654/ENSMUSG00000034730/ENSMUSG00000025582/ENSMUSG00000051149/ENSMUSG00000042589/ENSMUSG00000051790/ENSMUSG00000025656/ENSMUSG00000013033/ENSMUSG00000008153/ENSMUSG00000025920/ENSMUSG00000026959/ENSMUSG00000032827/…	40
169	Down	GO:0030534	adult behavior	41/1598	188/21087	5.50E-10	2.56E-08	2.19E-08	ENSMUSG00000023064/ENSMUSG00000072214/ENSMUSG00000034997/ENSMUSG00000026825/ENSMUSG00000027577/ENSMUSG00000029223/ENSMUSG00000022623/ENSMUSG00000018634/ENSMUSG00000047632/ENSMUSG00000055471/ENSMUSG00000000263/ENSMUSG00000025813/ENSMUSG00000000632/ENSMUSG00000021647/ENSMUSG00000051790/ENSMUSG00000058153/ENSMUSG00000042105/ENSMUSG00000029361/ENSMUSG00000057880/ENSMUSG00000026959/ENSMUSG00000030683/…	41
170	Down	GO:0044087	regulation of cellular component biogenesis	125/1598	947/21087	5.57E-10	2.58E-08	2.21E-08	ENSMUSG00000050148/ENSMUSG00000026797/ENSMUSG00000020366/ENSMUSG00000041670/ENSMUSG00000060780/ENSMUSG00000059146/ENSMUSG00000032537/ENSMUSG00000006435/ENSMUSG00000031840/ENSMUSG00000019997/ENSMUSG00000005469/ENSMUSG00000024777/ENSMUSG00000035863/ENSMUSG00000039953/ENSMUSG00000022812/ENSMUSG00000025499/ENSMUSG00000022623/ENSMUSG00000029673/ENSMUSG00000028991/ENSMUSG00000029073/ENSMUSG00000042700/…	125
171	Down	GO:0009201	ribonucleoside triphosphate biosynthetic process	36/1598	152/21087	5.64E-10	2.60E-08	2.22E-08	ENSMUSG00000029167/ENSMUSG00000028756/ENSMUSG00000049422/ENSMUSG00000059734/ENSMUSG00000003072/ENSMUSG00000032294/ENSMUSG00000028982/ENSMUSG00000006057/ENSMUSG00000024151/ENSMUSG00000025393/ENSMUSG00000026260/ENSMUSG00000025204/ENSMUSG00000022354/ENSMUSG00000018770/ENSMUSG00000025825/ENSMUSG00000071014/ENSMUSG00000050856/ENSMUSG00000038690/ENSMUSG00000064351/ENSMUSG00000022956/ENSMUSG00000000563/…	36
172	Down	GO:0030154	cell differentiation	418/1598	4237/21087	6.08E-10	2.79E-08	2.38E-08	ENSMUSG00000017737/ENSMUSG00000020099/ENSMUSG00000032336/ENSMUSG00000020891/ENSMUSG00000036585/ENSMUSG00000033208/ENSMUSG00000025407/ENSMUSG00000028546/ENSMUSG00000022619/ENSMUSG00000050132/ENSMUSG00000034997/ENSMUSG00000048895/ENSMUSG00000026797/ENSMUSG00000019428/ENSMUSG00000001366/ENSMUSG00000057897/ENSMUSG00000021816/ENSMUSG00000029167/ENSMUSG00000020366/ENSMUSG00000003575/ENSMUSG00000041670/…	418
173	Down	GO:0008089	anterograde axonal transport	19/1598	48/21087	6.35E-10	2.89E-08	2.47E-08	ENSMUSG00000027254/ENSMUSG00000024873/ENSMUSG00000057531/ENSMUSG00000040687/ENSMUSG00000024163/ENSMUSG00000006930/ENSMUSG00000020198/ENSMUSG00000015222/ENSMUSG00000052572/ENSMUSG00000032118/ENSMUSG00000074657/ENSMUSG00000022055/ENSMUSG00000042766/ENSMUSG00000018395/ENSMUSG00000063801/ENSMUSG00000063077/ENSMUSG00000042992/ENSMUSG00000014602/ENSMUSG00000062444	19
174	Down	GO:0098877	neurotransmitter receptor transport to plasma membrane	13/1598	22/21087	6.74E-10	3.05E-08	2.61E-08	ENSMUSG00000039953/ENSMUSG00000030098/ENSMUSG00000033615/ENSMUSG00000009894/ENSMUSG00000027273/ENSMUSG00000029126/ENSMUSG00000030805/ENSMUSG00000033389/ENSMUSG00000030806/ENSMUSG00000020894/ENSMUSG00000031153/ENSMUSG00000034813/ENSMUSG00000046709	13
175	Down	GO:0050803	regulation of synapse structure or activity	52/1598	277/21087	9.09E-10	4.09E-08	3.50E-08	ENSMUSG00000048895/ENSMUSG00000030209/ENSMUSG00000026825/ENSMUSG00000057897/ENSMUSG00000060780/ENSMUSG00000059146/ENSMUSG00000032537/ENSMUSG00000006435/ENSMUSG00000039953/ENSMUSG00000022812/ENSMUSG00000022623/ENSMUSG00000042700/ENSMUSG00000031654/ENSMUSG00000034730/ENSMUSG00000025582/ENSMUSG00000051149/ENSMUSG00000030098/ENSMUSG00000042589/ENSMUSG00000049551/ENSMUSG00000032890/ENSMUSG00000051790/…	52
176	Down	GO:0046390	ribose phosphate biosynthetic process	49/1598	253/21087	9.27E-10	4.15E-08	3.55E-08	ENSMUSG00000029167/ENSMUSG00000022840/ENSMUSG00000005580/ENSMUSG00000028756/ENSMUSG00000038967/ENSMUSG00000049422/ENSMUSG00000029361/ENSMUSG00000020431/ENSMUSG00000059734/ENSMUSG00000028785/ENSMUSG00000003072/ENSMUSG00000032294/ENSMUSG00000028982/ENSMUSG00000006057/ENSMUSG00000024151/ENSMUSG00000025630/ENSMUSG00000025393/ENSMUSG00000020333/ENSMUSG00000026260/ENSMUSG00000025204/ENSMUSG00000022354/…	49
177	Down	GO:0009205	purine ribonucleoside triphosphate metabolic process	37/1598	162/21087	9.72E-10	4.33E-08	3.70E-08	ENSMUSG00000029167/ENSMUSG00000028756/ENSMUSG00000049422/ENSMUSG00000059734/ENSMUSG00000003072/ENSMUSG00000032294/ENSMUSG00000028982/ENSMUSG00000006057/ENSMUSG00000024151/ENSMUSG00000025393/ENSMUSG00000026260/ENSMUSG00000025204/ENSMUSG00000022354/ENSMUSG00000018770/ENSMUSG00000025825/ENSMUSG00000071014/ENSMUSG00000050856/ENSMUSG00000038690/ENSMUSG00000064351/ENSMUSG00000022956/ENSMUSG00000000563/…	37
178	Down	GO:0009260	ribonucleotide biosynthetic process	48/1598	246/21087	1.06E-09	4.69E-08	4.01E-08	ENSMUSG00000029167/ENSMUSG00000022840/ENSMUSG00000005580/ENSMUSG00000028756/ENSMUSG00000038967/ENSMUSG00000049422/ENSMUSG00000029361/ENSMUSG00000020431/ENSMUSG00000059734/ENSMUSG00000028785/ENSMUSG00000003072/ENSMUSG00000032294/ENSMUSG00000028982/ENSMUSG00000006057/ENSMUSG00000024151/ENSMUSG00000025630/ENSMUSG00000025393/ENSMUSG00000020333/ENSMUSG00000026260/ENSMUSG00000025204/ENSMUSG00000022354/…	48
179	Down	GO:0048167	regulation of synaptic plasticity	62/1598	362/21087	1.08E-09	4.74E-08	4.05E-08	ENSMUSG00000017737/ENSMUSG00000042429/ENSMUSG00000033208/ENSMUSG00000021708/ENSMUSG00000026797/ENSMUSG00000030209/ENSMUSG00000057897/ENSMUSG00000003657/ENSMUSG00000020734/ENSMUSG00000003575/ENSMUSG00000041670/ENSMUSG00000060780/ENSMUSG00000006435/ENSMUSG00000031840/ENSMUSG00000020886/ENSMUSG00000017314/ENSMUSG00000022812/ENSMUSG00000025499/ENSMUSG00000024743/ENSMUSG00000022623/ENSMUSG00000018634/…	62
180	Down	GO:0006164	purine nucleotide biosynthetic process	48/1598	247/21087	1.22E-09	5.34E-08	4.57E-08	ENSMUSG00000029167/ENSMUSG00000022840/ENSMUSG00000005580/ENSMUSG00000028756/ENSMUSG00000038967/ENSMUSG00000049422/ENSMUSG00000029361/ENSMUSG00000020431/ENSMUSG00000059734/ENSMUSG00000028785/ENSMUSG00000003072/ENSMUSG00000032294/ENSMUSG00000028982/ENSMUSG00000006057/ENSMUSG00000024151/ENSMUSG00000025630/ENSMUSG00000025393/ENSMUSG00000020333/ENSMUSG00000026260/ENSMUSG00000025204/ENSMUSG00000022354/…	48
181	Down	GO:0048813	dendrite morphogenesis	39/1598	178/21087	1.25E-09	5.44E-08	4.65E-08	ENSMUSG00000028546/ENSMUSG00000022619/ENSMUSG00000050132/ENSMUSG00000048895/ENSMUSG00000057897/ENSMUSG00000032537/ENSMUSG00000059981/ENSMUSG00000020886/ENSMUSG00000022812/ENSMUSG00000022623/ENSMUSG00000023328/ENSMUSG00000042700/ENSMUSG00000006476/ENSMUSG00000042589/ENSMUSG00000028161/ENSMUSG00000057531/ENSMUSG00000033389/ENSMUSG00000022883/ENSMUSG00000025920/ENSMUSG00000026959/ENSMUSG00000032827/…	39
182	Down	GO:0090407	organophosphate biosynthetic process	79/1598	516/21087	1.43E-09	6.18E-08	5.28E-08	ENSMUSG00000034997/ENSMUSG00000029167/ENSMUSG00000022840/ENSMUSG00000005580/ENSMUSG00000028756/ENSMUSG00000038967/ENSMUSG00000049422/ENSMUSG00000029361/ENSMUSG00000020431/ENSMUSG00000059734/ENSMUSG00000028785/ENSMUSG00000032883/ENSMUSG00000003072/ENSMUSG00000032294/ENSMUSG00000028982/ENSMUSG00000048486/ENSMUSG00000006057/ENSMUSG00000024151/ENSMUSG00000025630/ENSMUSG00000025393/ENSMUSG00000020333/…	79
183	Down	GO:1903540	establishment of protein localization to postsynaptic membrane	13/1598	23/21087	1.44E-09	6.21E-08	5.31E-08	ENSMUSG00000039953/ENSMUSG00000030098/ENSMUSG00000033615/ENSMUSG00000009894/ENSMUSG00000027273/ENSMUSG00000029126/ENSMUSG00000030805/ENSMUSG00000033389/ENSMUSG00000030806/ENSMUSG00000020894/ENSMUSG00000031153/ENSMUSG00000034813/ENSMUSG00000046709	13
184	Down	GO:0009144	purine nucleoside triphosphate metabolic process	38/1598	172/21087	1.58E-09	6.78E-08	5.79E-08	ENSMUSG00000029167/ENSMUSG00000028756/ENSMUSG00000049422/ENSMUSG00000059734/ENSMUSG00000003072/ENSMUSG00000032294/ENSMUSG00000028982/ENSMUSG00000006057/ENSMUSG00000024151/ENSMUSG00000025393/ENSMUSG00000026260/ENSMUSG00000025204/ENSMUSG00000022354/ENSMUSG00000018770/ENSMUSG00000025825/ENSMUSG00000071014/ENSMUSG00000050856/ENSMUSG00000038690/ENSMUSG00000064351/ENSMUSG00000022956/ENSMUSG00000000563/…	38
185	Down	GO:0044057	regulation of system process	88/1598	601/21087	1.60E-09	6.82E-08	5.83E-08	ENSMUSG00000042429/ENSMUSG00000033208/ENSMUSG00000027895/ENSMUSG00000027584/ENSMUSG00000031748/ENSMUSG00000034997/ENSMUSG00000041670/ENSMUSG00000019997/ENSMUSG00000027577/ENSMUSG00000020886/ENSMUSG00000022812/ENSMUSG00000021313/ENSMUSG00000022623/ENSMUSG00000018634/ENSMUSG00000037010/ENSMUSG00000028991/ENSMUSG00000051343/ENSMUSG00000031654/ENSMUSG00000019828/ENSMUSG00000025582/ENSMUSG00000030669/…	88
186	Down	GO:0048856	anatomical structure development	549/1598	5871/21087	1.80E-09	7.64E-08	6.53E-08	ENSMUSG00000066392/ENSMUSG00000017737/ENSMUSG00000020099/ENSMUSG00000032336/ENSMUSG00000020891/ENSMUSG00000036585/ENSMUSG00000033208/ENSMUSG00000025407/ENSMUSG00000028546/ENSMUSG00000022619/ENSMUSG00000017897/ENSMUSG00000050132/ENSMUSG00000048895/ENSMUSG00000026797/ENSMUSG00000019428/ENSMUSG00000030209/ENSMUSG00000057897/ENSMUSG00000021816/ENSMUSG00000025151/ENSMUSG00000029167/ENSMUSG00000020366/…	549
187	Down	GO:0009199	ribonucleoside triphosphate metabolic process	37/1598	166/21087	2.00E-09	8.42E-08	7.20E-08	ENSMUSG00000029167/ENSMUSG00000028756/ENSMUSG00000049422/ENSMUSG00000059734/ENSMUSG00000003072/ENSMUSG00000032294/ENSMUSG00000028982/ENSMUSG00000006057/ENSMUSG00000024151/ENSMUSG00000025393/ENSMUSG00000026260/ENSMUSG00000025204/ENSMUSG00000022354/ENSMUSG00000018770/ENSMUSG00000025825/ENSMUSG00000071014/ENSMUSG00000050856/ENSMUSG00000038690/ENSMUSG00000064351/ENSMUSG00000022956/ENSMUSG00000000563/…	37
188	Down	GO:0015833	peptide transport	233/1598	2124/21087	2.05E-09	8.60E-08	7.35E-08	ENSMUSG00000020891/ENSMUSG00000042429/ENSMUSG00000047507/ENSMUSG00000021684/ENSMUSG00000023064/ENSMUSG00000048895/ENSMUSG00000026797/ENSMUSG00000037012/ENSMUSG00000019146/ENSMUSG00000026825/ENSMUSG00000042249/ENSMUSG00000021816/ENSMUSG00000058441/ENSMUSG00000041670/ENSMUSG00000006435/ENSMUSG00000031840/ENSMUSG00000005469/ENSMUSG00000039953/ENSMUSG00000022812/ENSMUSG00000025499/ENSMUSG00000022840/…	233
189	Down	GO:0050807	regulation of synapse organization	50/1598	267/21087	2.08E-09	8.67E-08	7.41E-08	ENSMUSG00000048895/ENSMUSG00000030209/ENSMUSG00000057897/ENSMUSG00000060780/ENSMUSG00000059146/ENSMUSG00000032537/ENSMUSG00000006435/ENSMUSG00000039953/ENSMUSG00000022812/ENSMUSG00000022623/ENSMUSG00000042700/ENSMUSG00000031654/ENSMUSG00000034730/ENSMUSG00000025582/ENSMUSG00000051149/ENSMUSG00000030098/ENSMUSG00000042589/ENSMUSG00000049551/ENSMUSG00000032890/ENSMUSG00000051790/ENSMUSG00000025656/…	50
190	Down	GO:0034329	cell junction assembly	63/1598	377/21087	2.16E-09	8.98E-08	7.67E-08	ENSMUSG00000066392/ENSMUSG00000032336/ENSMUSG00000060780/ENSMUSG00000059146/ENSMUSG00000032537/ENSMUSG00000059981/ENSMUSG00000005469/ENSMUSG00000039953/ENSMUSG00000022623/ENSMUSG00000023328/ENSMUSG00000042700/ENSMUSG00000031654/ENSMUSG00000034730/ENSMUSG00000026697/ENSMUSG00000025582/ENSMUSG00000032011/ENSMUSG00000051149/ENSMUSG00000069255/ENSMUSG00000042589/ENSMUSG00000051790/ENSMUSG00000025656/…	63
191	Down	GO:0072522	purine-containing compound biosynthetic process	48/1598	252/21087	2.44E-09	1.01E-07	8.59E-08	ENSMUSG00000029167/ENSMUSG00000022840/ENSMUSG00000005580/ENSMUSG00000028756/ENSMUSG00000038967/ENSMUSG00000049422/ENSMUSG00000029361/ENSMUSG00000020431/ENSMUSG00000059734/ENSMUSG00000028785/ENSMUSG00000003072/ENSMUSG00000032294/ENSMUSG00000028982/ENSMUSG00000006057/ENSMUSG00000024151/ENSMUSG00000025630/ENSMUSG00000025393/ENSMUSG00000020333/ENSMUSG00000026260/ENSMUSG00000025204/ENSMUSG00000022354/…	48
192	Down	GO:2000026	regulation of multicellular organismal development	240/1598	2208/21087	2.60E-09	1.07E-07	9.12E-08	ENSMUSG00000017737/ENSMUSG00000020891/ENSMUSG00000036585/ENSMUSG00000033208/ENSMUSG00000025407/ENSMUSG00000028546/ENSMUSG00000050132/ENSMUSG00000048895/ENSMUSG00000057897/ENSMUSG00000025151/ENSMUSG00000003575/ENSMUSG00000041670/ENSMUSG00000060780/ENSMUSG00000059146/ENSMUSG00000032537/ENSMUSG00000006435/ENSMUSG00000019997/ENSMUSG00000005469/ENSMUSG00000024777/ENSMUSG00000035863/ENSMUSG00000020886/…	240
193	Down	GO:0036465	synaptic vesicle recycling	23/1598	74/21087	2.75E-09	1.12E-07	9.61E-08	ENSMUSG00000026825/ENSMUSG00000021816/ENSMUSG00000031840/ENSMUSG00000024743/ENSMUSG00000031144/ENSMUSG00000040722/ENSMUSG00000027438/ENSMUSG00000051790/ENSMUSG00000030806/ENSMUSG00000026452/ENSMUSG00000020894/ENSMUSG00000020198/ENSMUSG00000033419/ENSMUSG00000034891/ENSMUSG00000021314/ENSMUSG00000028488/ENSMUSG00000031153/ENSMUSG00000040276/ENSMUSG00000034902/ENSMUSG00000022841/ENSMUSG00000040265/…	23
194	Down	GO:0048869	cellular developmental process	423/1598	4348/21087	2.97E-09	1.21E-07	1.03E-07	ENSMUSG00000017737/ENSMUSG00000020099/ENSMUSG00000032336/ENSMUSG00000020891/ENSMUSG00000036585/ENSMUSG00000033208/ENSMUSG00000025407/ENSMUSG00000028546/ENSMUSG00000022619/ENSMUSG00000050132/ENSMUSG00000034997/ENSMUSG00000048895/ENSMUSG00000026797/ENSMUSG00000019428/ENSMUSG00000001366/ENSMUSG00000057897/ENSMUSG00000021816/ENSMUSG00000029167/ENSMUSG00000020366/ENSMUSG00000003575/ENSMUSG00000041670/…	423
195	Down	GO:0042886	amide transport	234/1598	2145/21087	3.10E-09	1.25E-07	1.07E-07	ENSMUSG00000020891/ENSMUSG00000042429/ENSMUSG00000047507/ENSMUSG00000021684/ENSMUSG00000023064/ENSMUSG00000048895/ENSMUSG00000026797/ENSMUSG00000037012/ENSMUSG00000019146/ENSMUSG00000026825/ENSMUSG00000042249/ENSMUSG00000021816/ENSMUSG00000058441/ENSMUSG00000041670/ENSMUSG00000006435/ENSMUSG00000031840/ENSMUSG00000005469/ENSMUSG00000039953/ENSMUSG00000022812/ENSMUSG00000025499/ENSMUSG00000022840/…	234
196	Down	GO:0042773	ATP synthesis coupled electron transport	21/1598	63/21087	3.24E-09	1.30E-07	1.11E-07	ENSMUSG00000028756/ENSMUSG00000059734/ENSMUSG00000026260/ENSMUSG00000025204/ENSMUSG00000022354/ENSMUSG00000025825/ENSMUSG00000071014/ENSMUSG00000064351/ENSMUSG00000064367/ENSMUSG00000000088/ENSMUSG00000024099/ENSMUSG00000041697/ENSMUSG00000021577/ENSMUSG00000022551/ENSMUSG00000024038/ENSMUSG00000037916/ENSMUSG00000031818/ENSMUSG00000038462/ENSMUSG00000064345/ENSMUSG00000064370/ENSMUSG00000061518	21
197	Down	GO:0050885	neuromuscular process controlling balance	22/1598	69/21087	3.55E-09	1.42E-07	1.21E-07	ENSMUSG00000021684/ENSMUSG00000057897/ENSMUSG00000020734/ENSMUSG00000020886/ENSMUSG00000022840/ENSMUSG00000022623/ENSMUSG00000051790/ENSMUSG00000025318/ENSMUSG00000017631/ENSMUSG00000038738/ENSMUSG00000030302/ENSMUSG00000022208/ENSMUSG00000014592/ENSMUSG00000034656/ENSMUSG00000017167/ENSMUSG00000025579/ENSMUSG00000033565/ENSMUSG00000063142/ENSMUSG00000020900/ENSMUSG00000022055/ENSMUSG00000031367/…	22
198	Down	GO:0009142	nucleoside triphosphate biosynthetic process	36/1598	162/21087	3.58E-09	1.43E-07	1.22E-07	ENSMUSG00000029167/ENSMUSG00000028756/ENSMUSG00000049422/ENSMUSG00000059734/ENSMUSG00000003072/ENSMUSG00000032294/ENSMUSG00000028982/ENSMUSG00000006057/ENSMUSG00000024151/ENSMUSG00000025393/ENSMUSG00000026260/ENSMUSG00000025204/ENSMUSG00000022354/ENSMUSG00000018770/ENSMUSG00000025825/ENSMUSG00000071014/ENSMUSG00000050856/ENSMUSG00000038690/ENSMUSG00000064351/ENSMUSG00000022956/ENSMUSG00000000563/…	36
199	Down	GO:0050773	regulation of dendrite development	40/1598	192/21087	3.64E-09	1.44E-07	1.23E-07	ENSMUSG00000028546/ENSMUSG00000050132/ENSMUSG00000048895/ENSMUSG00000057897/ENSMUSG00000003575/ENSMUSG00000006435/ENSMUSG00000035863/ENSMUSG00000022812/ENSMUSG00000022623/ENSMUSG00000028991/ENSMUSG00000023328/ENSMUSG00000042700/ENSMUSG00000006476/ENSMUSG00000055471/ENSMUSG00000042589/ENSMUSG00000028161/ENSMUSG00000000632/ENSMUSG00000051790/ENSMUSG00000057531/ENSMUSG00000057177/ENSMUSG00000033389/…	40
200	Down	GO:0051050	positive regulation of transport	136/1598	1090/21087	3.88E-09	1.53E-07	1.31E-07	ENSMUSG00000020891/ENSMUSG00000042429/ENSMUSG00000047507/ENSMUSG00000072214/ENSMUSG00000027584/ENSMUSG00000048895/ENSMUSG00000026797/ENSMUSG00000037012/ENSMUSG00000030209/ENSMUSG00000019146/ENSMUSG00000026825/ENSMUSG00000021816/ENSMUSG00000058441/ENSMUSG00000020366/ENSMUSG00000041670/ENSMUSG00000031840/ENSMUSG00000005469/ENSMUSG00000027577/ENSMUSG00000022812/ENSMUSG00000025499/ENSMUSG00000030731/…	136
201	Down	GO:0099518	vesicle cytoskeletal trafficking	19/1598	53/21087	4.54E-09	1.78E-07	1.52E-07	ENSMUSG00000024873/ENSMUSG00000057531/ENSMUSG00000040687/ENSMUSG00000006930/ENSMUSG00000029053/ENSMUSG00000041794/ENSMUSG00000020198/ENSMUSG00000018736/ENSMUSG00000015222/ENSMUSG00000018707/ENSMUSG00000074657/ENSMUSG00000042766/ENSMUSG00000041609/ENSMUSG00000029757/ENSMUSG00000063801/ENSMUSG00000063077/ENSMUSG00000042992/ENSMUSG00000014602/ENSMUSG00000062444	19
202	Down	GO:0047496	vesicle transport along microtubule	18/1598	48/21087	5.01E-09	1.96E-07	1.67E-07	ENSMUSG00000024873/ENSMUSG00000057531/ENSMUSG00000040687/ENSMUSG00000006930/ENSMUSG00000029053/ENSMUSG00000020198/ENSMUSG00000018736/ENSMUSG00000015222/ENSMUSG00000018707/ENSMUSG00000074657/ENSMUSG00000042766/ENSMUSG00000041609/ENSMUSG00000029757/ENSMUSG00000063801/ENSMUSG00000063077/ENSMUSG00000042992/ENSMUSG00000014602/ENSMUSG00000062444	18
203	Down	GO:0050793	regulation of developmental process	286/1598	2749/21087	5.19E-09	2.01E-07	1.72E-07	ENSMUSG00000017737/ENSMUSG00000020891/ENSMUSG00000036585/ENSMUSG00000033208/ENSMUSG00000025407/ENSMUSG00000028546/ENSMUSG00000050132/ENSMUSG00000034997/ENSMUSG00000048895/ENSMUSG00000057897/ENSMUSG00000025151/ENSMUSG00000029167/ENSMUSG00000020366/ENSMUSG00000003575/ENSMUSG00000041670/ENSMUSG00000005045/ENSMUSG00000060780/ENSMUSG00000059146/ENSMUSG00000032537/ENSMUSG00000006435/ENSMUSG00000019997/…	286
204	Down	GO:0042775	mitochondrial ATP synthesis coupled electron transport	20/1598	59/21087	5.49E-09	2.12E-07	1.81E-07	ENSMUSG00000028756/ENSMUSG00000059734/ENSMUSG00000026260/ENSMUSG00000025204/ENSMUSG00000022354/ENSMUSG00000025825/ENSMUSG00000071014/ENSMUSG00000064351/ENSMUSG00000000088/ENSMUSG00000024099/ENSMUSG00000041697/ENSMUSG00000021577/ENSMUSG00000022551/ENSMUSG00000024038/ENSMUSG00000037916/ENSMUSG00000031818/ENSMUSG00000038462/ENSMUSG00000064345/ENSMUSG00000064370/ENSMUSG00000061518	20
205	Down	GO:0031629	synaptic vesicle fusion to presynaptic active zone membrane	13/1598	25/21087	5.68E-09	2.18E-07	1.87E-07	ENSMUSG00000026797/ENSMUSG00000031840/ENSMUSG00000024743/ENSMUSG00000033615/ENSMUSG00000009894/ENSMUSG00000027273/ENSMUSG00000030805/ENSMUSG00000025867/ENSMUSG00000030806/ENSMUSG00000003378/ENSMUSG00000045114/ENSMUSG00000030337/ENSMUSG00000026452	13
206	Down	GO:0015031	protein transport	226/1598	2071/21087	5.91E-09	2.26E-07	1.93E-07	ENSMUSG00000020891/ENSMUSG00000042429/ENSMUSG00000047507/ENSMUSG00000021684/ENSMUSG00000023064/ENSMUSG00000048895/ENSMUSG00000026797/ENSMUSG00000037012/ENSMUSG00000019146/ENSMUSG00000026825/ENSMUSG00000042249/ENSMUSG00000021816/ENSMUSG00000058441/ENSMUSG00000041670/ENSMUSG00000006435/ENSMUSG00000031840/ENSMUSG00000005469/ENSMUSG00000039953/ENSMUSG00000022812/ENSMUSG00000025499/ENSMUSG00000022840/…	226
207	Down	GO:0043933	protein-containing complex subunit organization	211/1598	1908/21087	7.02E-09	2.67E-07	2.28E-07	ENSMUSG00000017737/ENSMUSG00000027895/ENSMUSG00000035953/ENSMUSG00000026797/ENSMUSG00000030209/ENSMUSG00000020366/ENSMUSG00000032601/ENSMUSG00000003575/ENSMUSG00000041670/ENSMUSG00000005045/ENSMUSG00000031840/ENSMUSG00000024777/ENSMUSG00000027577/ENSMUSG00000020886/ENSMUSG00000017314/ENSMUSG00000022812/ENSMUSG00000025499/ENSMUSG00000020135/ENSMUSG00000022623/ENSMUSG00000078566/ENSMUSG00000028991/…	211
208	Down	GO:0045184	establishment of protein localization	234/1598	2167/21087	7.65E-09	2.90E-07	2.48E-07	ENSMUSG00000020891/ENSMUSG00000042429/ENSMUSG00000047507/ENSMUSG00000021684/ENSMUSG00000023064/ENSMUSG00000048895/ENSMUSG00000026797/ENSMUSG00000037012/ENSMUSG00000019146/ENSMUSG00000026825/ENSMUSG00000042249/ENSMUSG00000021816/ENSMUSG00000058441/ENSMUSG00000041670/ENSMUSG00000006435/ENSMUSG00000031840/ENSMUSG00000005469/ENSMUSG00000020886/ENSMUSG00000039953/ENSMUSG00000022812/ENSMUSG00000025499/…	234
209	Down	GO:0009150	purine ribonucleotide metabolic process	64/1598	400/21087	9.36E-09	3.53E-07	3.02E-07	ENSMUSG00000034997/ENSMUSG00000037012/ENSMUSG00000029167/ENSMUSG00000022840/ENSMUSG00000005580/ENSMUSG00000028756/ENSMUSG00000038967/ENSMUSG00000049422/ENSMUSG00000029361/ENSMUSG00000020431/ENSMUSG00000030302/ENSMUSG00000035011/ENSMUSG00000059734/ENSMUSG00000028785/ENSMUSG00000003072/ENSMUSG00000032294/ENSMUSG00000028982/ENSMUSG00000038028/ENSMUSG00000006057/ENSMUSG00000021255/ENSMUSG00000024151/…	64
210	Down	GO:0009141	nucleoside triphosphate metabolic process	39/1598	192/21087	1.20E-08	4.49E-07	3.84E-07	ENSMUSG00000029167/ENSMUSG00000028756/ENSMUSG00000049422/ENSMUSG00000059734/ENSMUSG00000003072/ENSMUSG00000032294/ENSMUSG00000028982/ENSMUSG00000006057/ENSMUSG00000024151/ENSMUSG00000025393/ENSMUSG00000026260/ENSMUSG00000025204/ENSMUSG00000022354/ENSMUSG00000018770/ENSMUSG00000025825/ENSMUSG00000071014/ENSMUSG00000050856/ENSMUSG00000038690/ENSMUSG00000064351/ENSMUSG00000022956/ENSMUSG00000000563/…	39
211	Down	GO:0050794	regulation of cellular process	932/1598	10897/21087	1.70E-08	6.36E-07	5.44E-07	ENSMUSG00000066392/ENSMUSG00000017737/ENSMUSG00000020099/ENSMUSG00000032336/ENSMUSG00000020891/ENSMUSG00000036585/ENSMUSG00000024277/ENSMUSG00000042429/ENSMUSG00000047507/ENSMUSG00000024524/ENSMUSG00000033208/ENSMUSG00000021684/ENSMUSG00000027895/ENSMUSG00000024186/ENSMUSG00000050148/ENSMUSG00000021708/ENSMUSG00000025407/ENSMUSG00000023064/ENSMUSG00000035953/ENSMUSG00000027223/ENSMUSG00000072214/…	932
212	Down	GO:0006119	oxidative phosphorylation	26/1598	100/21087	1.74E-08	6.48E-07	5.54E-07	ENSMUSG00000028756/ENSMUSG00000049422/ENSMUSG00000059734/ENSMUSG00000028982/ENSMUSG00000024151/ENSMUSG00000025393/ENSMUSG00000026260/ENSMUSG00000025204/ENSMUSG00000022354/ENSMUSG00000025825/ENSMUSG00000071014/ENSMUSG00000064351/ENSMUSG00000022956/ENSMUSG00000064367/ENSMUSG00000000088/ENSMUSG00000024099/ENSMUSG00000041697/ENSMUSG00000021577/ENSMUSG00000022551/ENSMUSG00000024038/ENSMUSG00000037916/…	26
213	Down	GO:0009165	nucleotide biosynthetic process	51/1598	293/21087	1.85E-08	6.86E-07	5.87E-07	ENSMUSG00000029167/ENSMUSG00000022840/ENSMUSG00000005580/ENSMUSG00000028756/ENSMUSG00000038967/ENSMUSG00000049422/ENSMUSG00000029361/ENSMUSG00000020431/ENSMUSG00000059734/ENSMUSG00000028785/ENSMUSG00000003072/ENSMUSG00000032294/ENSMUSG00000028982/ENSMUSG00000006057/ENSMUSG00000024151/ENSMUSG00000025630/ENSMUSG00000025393/ENSMUSG00000020333/ENSMUSG00000026260/ENSMUSG00000025204/ENSMUSG00000022354/…	51
214	Down	GO:0031646	positive regulation of nervous system process	23/1598	81/21087	1.90E-08	6.99E-07	5.98E-07	ENSMUSG00000033208/ENSMUSG00000027584/ENSMUSG00000041670/ENSMUSG00000020886/ENSMUSG00000022812/ENSMUSG00000022623/ENSMUSG00000028991/ENSMUSG00000047632/ENSMUSG00000024858/ENSMUSG00000030098/ENSMUSG00000042589/ENSMUSG00000021647/ENSMUSG00000051790/ENSMUSG00000030806/ENSMUSG00000029053/ENSMUSG00000057880/ENSMUSG00000026959/ENSMUSG00000062991/ENSMUSG00000038738/ENSMUSG00000048078/ENSMUSG00000032532/…	23
215	Down	GO:0044089	positive regulation of cellular component biogenesis	77/1598	529/21087	2.20E-08	8.06E-07	6.89E-07	ENSMUSG00000020366/ENSMUSG00000041670/ENSMUSG00000060780/ENSMUSG00000059146/ENSMUSG00000032537/ENSMUSG00000006435/ENSMUSG00000019997/ENSMUSG00000024777/ENSMUSG00000035863/ENSMUSG00000039953/ENSMUSG00000022812/ENSMUSG00000025499/ENSMUSG00000029673/ENSMUSG00000028991/ENSMUSG00000031654/ENSMUSG00000034730/ENSMUSG00000026697/ENSMUSG00000032011/ENSMUSG00000039615/ENSMUSG00000074238/ENSMUSG00000051149/…	77
216	Down	GO:0065007	biological regulation	1016/1598	12038/21087	2.31E-08	8.42E-07	7.20E-07	ENSMUSG00000066392/ENSMUSG00000017737/ENSMUSG00000020099/ENSMUSG00000032336/ENSMUSG00000020891/ENSMUSG00000036585/ENSMUSG00000024277/ENSMUSG00000042429/ENSMUSG00000047507/ENSMUSG00000024524/ENSMUSG00000033208/ENSMUSG00000021684/ENSMUSG00000027895/ENSMUSG00000024186/ENSMUSG00000050148/ENSMUSG00000021708/ENSMUSG00000025407/ENSMUSG00000023064/ENSMUSG00000035953/ENSMUSG00000027223/ENSMUSG00000072214/…	1016
217	Down	GO:0009259	ribonucleotide metabolic process	64/1598	410/21087	2.46E-08	8.95E-07	7.65E-07	ENSMUSG00000034997/ENSMUSG00000037012/ENSMUSG00000029167/ENSMUSG00000022840/ENSMUSG00000005580/ENSMUSG00000028756/ENSMUSG00000038967/ENSMUSG00000049422/ENSMUSG00000029361/ENSMUSG00000020431/ENSMUSG00000030302/ENSMUSG00000035011/ENSMUSG00000059734/ENSMUSG00000028785/ENSMUSG00000003072/ENSMUSG00000032294/ENSMUSG00000028982/ENSMUSG00000038028/ENSMUSG00000006057/ENSMUSG00000021255/ENSMUSG00000024151/…	64
218	Down	GO:0001508	action potential	35/1598	167/21087	2.89E-08	1.04616E-06	8.94E-07	ENSMUSG00000027895/ENSMUSG00000030209/ENSMUSG00000019146/ENSMUSG00000059146/ENSMUSG00000027577/ENSMUSG00000021313/ENSMUSG00000000263/ENSMUSG00000021647/ENSMUSG00000020635/ENSMUSG00000050556/ENSMUSG00000030043/ENSMUSG00000040724/ENSMUSG00000028854/ENSMUSG00000034656/ENSMUSG00000017167/ENSMUSG00000069601/ENSMUSG00000019194/ENSMUSG00000051331/ENSMUSG00000011751/ENSMUSG00000063142/ENSMUSG00000047976/…	35
219	Down	GO:0019693	ribose phosphate metabolic process	65/1598	421/21087	2.95E-08	1.06089E-06	9.07E-07	ENSMUSG00000034997/ENSMUSG00000037012/ENSMUSG00000029167/ENSMUSG00000022840/ENSMUSG00000005580/ENSMUSG00000028756/ENSMUSG00000038967/ENSMUSG00000049422/ENSMUSG00000029361/ENSMUSG00000020431/ENSMUSG00000030302/ENSMUSG00000035011/ENSMUSG00000059734/ENSMUSG00000028785/ENSMUSG00000003072/ENSMUSG00000032294/ENSMUSG00000028982/ENSMUSG00000038028/ENSMUSG00000006057/ENSMUSG00000021255/ENSMUSG00000024151/…	65
220	Down	GO:0051952	regulation of amine transport	28/1598	117/21087	3.55E-08	1.27078E-06	1.08629E-06	ENSMUSG00000042429/ENSMUSG00000023064/ENSMUSG00000034997/ENSMUSG00000026797/ENSMUSG00000030209/ENSMUSG00000027577/ENSMUSG00000030731/ENSMUSG00000024743/ENSMUSG00000018634/ENSMUSG00000090223/ENSMUSG00000028756/ENSMUSG00000024858/ENSMUSG00000030310/ENSMUSG00000021647/ENSMUSG00000048142/ENSMUSG00000021194/ENSMUSG00000057531/ENSMUSG00000050556/ENSMUSG00000040724/ENSMUSG00000024462/ENSMUSG00000027220/…	28
221	Down	GO:1901293	nucleoside phosphate biosynthetic process	51/1598	299/21087	3.67E-08	1.3097E-06	1.11956E-06	ENSMUSG00000029167/ENSMUSG00000022840/ENSMUSG00000005580/ENSMUSG00000028756/ENSMUSG00000038967/ENSMUSG00000049422/ENSMUSG00000029361/ENSMUSG00000020431/ENSMUSG00000059734/ENSMUSG00000028785/ENSMUSG00000003072/ENSMUSG00000032294/ENSMUSG00000028982/ENSMUSG00000006057/ENSMUSG00000024151/ENSMUSG00000025630/ENSMUSG00000025393/ENSMUSG00000020333/ENSMUSG00000026260/ENSMUSG00000025204/ENSMUSG00000022354/…	51
222	Down	GO:0008090	retrograde axonal transport	11/1598	20/21087	4.05E-08	1.43807E-06	1.22929E-06	ENSMUSG00000027254/ENSMUSG00000006930/ENSMUSG00000026131/ENSMUSG00000018736/ENSMUSG00000052572/ENSMUSG00000018707/ENSMUSG00000074657/ENSMUSG00000022055/ENSMUSG00000032589/ENSMUSG00000063077/ENSMUSG00000014602	11
223	Down	GO:0065009	regulation of molecular function	286/1598	2809/21087	4.27E-08	1.5076E-06	1.28873E-06	ENSMUSG00000017737/ENSMUSG00000036585/ENSMUSG00000024277/ENSMUSG00000042429/ENSMUSG00000024524/ENSMUSG00000033208/ENSMUSG00000021708/ENSMUSG00000027223/ENSMUSG00000027584/ENSMUSG00000031748/ENSMUSG00000022619/ENSMUSG00000034997/ENSMUSG00000048895/ENSMUSG00000000296/ENSMUSG00000037012/ENSMUSG00000030209/ENSMUSG00000019146/ENSMUSG00000057897/ENSMUSG00000025151/ENSMUSG00000029167/ENSMUSG00000020366/…	286
224	Down	GO:0006163	purine nucleotide metabolic process	64/1598	416/21087	4.31E-08	1.51681E-06	1.2966E-06	ENSMUSG00000034997/ENSMUSG00000037012/ENSMUSG00000029167/ENSMUSG00000022840/ENSMUSG00000005580/ENSMUSG00000028756/ENSMUSG00000038967/ENSMUSG00000049422/ENSMUSG00000029361/ENSMUSG00000020431/ENSMUSG00000030302/ENSMUSG00000035011/ENSMUSG00000059734/ENSMUSG00000028785/ENSMUSG00000003072/ENSMUSG00000032294/ENSMUSG00000028982/ENSMUSG00000038028/ENSMUSG00000006057/ENSMUSG00000021255/ENSMUSG00000024151/…	64
225	Down	GO:0051963	regulation of synapse assembly	28/1598	119/21087	5.24E-08	1.83656E-06	1.56993E-06	ENSMUSG00000060780/ENSMUSG00000059146/ENSMUSG00000032537/ENSMUSG00000039953/ENSMUSG00000042700/ENSMUSG00000031654/ENSMUSG00000034730/ENSMUSG00000025582/ENSMUSG00000051149/ENSMUSG00000042589/ENSMUSG00000051790/ENSMUSG00000025656/ENSMUSG00000013033/ENSMUSG00000008153/ENSMUSG00000025920/ENSMUSG00000026959/ENSMUSG00000032827/ENSMUSG00000028782/ENSMUSG00000030600/ENSMUSG00000033707/ENSMUSG00000042873/…	28
226	Down	GO:0097479	synaptic vesicle localization	19/1598	61/21087	6.29E-08	2.19402E-06	1.87549E-06	ENSMUSG00000026825/ENSMUSG00000031840/ENSMUSG00000024873/ENSMUSG00000051790/ENSMUSG00000057531/ENSMUSG00000040687/ENSMUSG00000037217/ENSMUSG00000009394/ENSMUSG00000020198/ENSMUSG00000033419/ENSMUSG00000015222/ENSMUSG00000074736/ENSMUSG00000074657/ENSMUSG00000040265/ENSMUSG00000042766/ENSMUSG00000031367/ENSMUSG00000063801/ENSMUSG00000042992/ENSMUSG00000062444	19
227	Down	GO:0032502	developmental process	574/1598	6325/21087	6.84E-08	2.37418E-06	2.0295E-06	ENSMUSG00000066392/ENSMUSG00000017737/ENSMUSG00000020099/ENSMUSG00000032336/ENSMUSG00000020891/ENSMUSG00000036585/ENSMUSG00000047507/ENSMUSG00000033208/ENSMUSG00000025407/ENSMUSG00000031748/ENSMUSG00000028546/ENSMUSG00000022619/ENSMUSG00000017897/ENSMUSG00000050132/ENSMUSG00000034997/ENSMUSG00000048895/ENSMUSG00000026797/ENSMUSG00000019428/ENSMUSG00000030209/ENSMUSG00000001366/ENSMUSG00000057897/…	574
228	Down	GO:0065003	protein-containing complex assembly	189/1598	1718/21087	7.01E-08	2.42296E-06	2.0712E-06	ENSMUSG00000017737/ENSMUSG00000027895/ENSMUSG00000035953/ENSMUSG00000026797/ENSMUSG00000030209/ENSMUSG00000020366/ENSMUSG00000032601/ENSMUSG00000003575/ENSMUSG00000041670/ENSMUSG00000031840/ENSMUSG00000024777/ENSMUSG00000027577/ENSMUSG00000020886/ENSMUSG00000017314/ENSMUSG00000022812/ENSMUSG00000025499/ENSMUSG00000022623/ENSMUSG00000028991/ENSMUSG00000029073/ENSMUSG00000023328/ENSMUSG00000028756/…	189
229	Down	GO:0048522	positive regulation of cellular process	515/1598	5590/21087	7.16E-08	2.46337E-06	2.10574E-06	ENSMUSG00000017737/ENSMUSG00000020099/ENSMUSG00000020891/ENSMUSG00000036585/ENSMUSG00000024277/ENSMUSG00000042429/ENSMUSG00000047507/ENSMUSG00000033208/ENSMUSG00000050148/ENSMUSG00000021708/ENSMUSG00000025407/ENSMUSG00000035953/ENSMUSG00000027223/ENSMUSG00000072214/ENSMUSG00000028546/ENSMUSG00000022619/ENSMUSG00000017897/ENSMUSG00000006575/ENSMUSG00000034997/ENSMUSG00000048895/ENSMUSG00000000296/…	515
230	Down	GO:0015837	amine transport	28/1598	121/21087	7.67E-08	2.62857E-06	2.24695E-06	ENSMUSG00000042429/ENSMUSG00000023064/ENSMUSG00000034997/ENSMUSG00000026797/ENSMUSG00000030209/ENSMUSG00000027577/ENSMUSG00000030731/ENSMUSG00000024743/ENSMUSG00000018634/ENSMUSG00000090223/ENSMUSG00000028756/ENSMUSG00000024858/ENSMUSG00000030310/ENSMUSG00000021647/ENSMUSG00000048142/ENSMUSG00000021194/ENSMUSG00000057531/ENSMUSG00000050556/ENSMUSG00000040724/ENSMUSG00000024462/ENSMUSG00000027220/…	28
231	Down	GO:0035637	multicellular organismal signaling	31/1598	143/21087	7.84E-08	2.6744E-06	2.28613E-06	ENSMUSG00000027895/ENSMUSG00000019146/ENSMUSG00000059146/ENSMUSG00000021313/ENSMUSG00000024065/ENSMUSG00000000263/ENSMUSG00000021647/ENSMUSG00000020635/ENSMUSG00000040724/ENSMUSG00000028854/ENSMUSG00000034656/ENSMUSG00000017167/ENSMUSG00000069601/ENSMUSG00000019194/ENSMUSG00000051331/ENSMUSG00000011751/ENSMUSG00000063142/ENSMUSG00000047976/ENSMUSG00000038319/ENSMUSG00000005950/ENSMUSG00000020866/…	31
232	Down	GO:0048168	regulation of neuronal synaptic plasticity	20/1598	68/21087	8.33E-08	2.82889E-06	2.4182E-06	ENSMUSG00000033208/ENSMUSG00000030209/ENSMUSG00000057897/ENSMUSG00000041670/ENSMUSG00000006435/ENSMUSG00000031840/ENSMUSG00000020886/ENSMUSG00000022812/ENSMUSG00000025499/ENSMUSG00000022623/ENSMUSG00000032356/ENSMUSG00000006476/ENSMUSG00000031144/ENSMUSG00000037428/ENSMUSG00000003863/ENSMUSG00000025318/ENSMUSG00000028833/ENSMUSG00000037217/ENSMUSG00000026959/ENSMUSG00000022602	20
233	Down	GO:0099111	microtubule-based transport	65/1598	433/21087	8.68E-08	2.93351E-06	2.50762E-06	ENSMUSG00000006435/ENSMUSG00000029223/ENSMUSG00000033862/ENSMUSG00000024065/ENSMUSG00000027254/ENSMUSG00000024873/ENSMUSG00000057531/ENSMUSG00000040687/ENSMUSG00000024163/ENSMUSG00000006930/ENSMUSG00000029053/ENSMUSG00000090100/ENSMUSG00000058230/ENSMUSG00000025920/ENSMUSG00000036825/ENSMUSG00000021288/ENSMUSG00000020396/ENSMUSG00000028975/ENSMUSG00000037351/ENSMUSG00000030397/ENSMUSG00000047766/…	65
234	Down	GO:0051129	negative regulation of cellular component organization	96/1598	733/21087	8.71E-08	2.93351E-06	2.50762E-06	ENSMUSG00000050148/ENSMUSG00000048895/ENSMUSG00000026797/ENSMUSG00000030209/ENSMUSG00000029167/ENSMUSG00000060780/ENSMUSG00000020886/ENSMUSG00000022812/ENSMUSG00000020135/ENSMUSG00000038264/ENSMUSG00000022623/ENSMUSG00000078566/ENSMUSG00000029073/ENSMUSG00000033862/ENSMUSG00000026697/ENSMUSG00000038807/ENSMUSG00000032011/ENSMUSG00000028756/ENSMUSG00000027254/ENSMUSG00000069255/ENSMUSG00000050357/…	96
235	Down	GO:0032886	regulation of microtubule-based process	43/1598	239/21087	9.07E-08	3.04337E-06	2.60153E-06	ENSMUSG00000024277/ENSMUSG00000048895/ENSMUSG00000022812/ENSMUSG00000020135/ENSMUSG00000027254/ENSMUSG00000024873/ENSMUSG00000027581/ENSMUSG00000057177/ENSMUSG00000006930/ENSMUSG00000090100/ENSMUSG00000020396/ENSMUSG00000030397/ENSMUSG00000033788/ENSMUSG00000026131/ENSMUSG00000015095/ENSMUSG00000062591/ENSMUSG00000030357/ENSMUSG00000031865/ENSMUSG00000038241/ENSMUSG00000033900/ENSMUSG00000034570/…	43
236	Down	GO:0035640	exploration behavior	13/1598	30/21087	9.12E-08	3.04592E-06	2.60372E-06	ENSMUSG00000060780/ENSMUSG00000027577/ENSMUSG00000020886/ENSMUSG00000022623/ENSMUSG00000018634/ENSMUSG00000030854/ENSMUSG00000001507/ENSMUSG00000051790/ENSMUSG00000045038/ENSMUSG00000025318/ENSMUSG00000057880/ENSMUSG00000028351/ENSMUSG00000061080	13
237	Down	GO:0019233	sensory perception of pain	31/1598	144/21087	9.27E-08	3.0838E-06	2.6361E-06	ENSMUSG00000042429/ENSMUSG00000027895/ENSMUSG00000027584/ENSMUSG00000034997/ENSMUSG00000030209/ENSMUSG00000032537/ENSMUSG00000027577/ENSMUSG00000029223/ENSMUSG00000028991/ENSMUSG00000036062/ENSMUSG00000019828/ENSMUSG00000030669/ENSMUSG00000024858/ENSMUSG00000051790/ENSMUSG00000030043/ENSMUSG00000040724/ENSMUSG00000028854/ENSMUSG00000029361/ENSMUSG00000026959/ENSMUSG00000030898/ENSMUSG00000002771/…	31
238	Down	GO:0008306	associative learning	25/1598	102/21087	1.15E-07	3.80376E-06	3.25154E-06	ENSMUSG00000021684/ENSMUSG00000027584/ENSMUSG00000030209/ENSMUSG00000023017/ENSMUSG00000018634/ENSMUSG00000028991/ENSMUSG00000035390/ENSMUSG00000027254/ENSMUSG00000059991/ENSMUSG00000027273/ENSMUSG00000040136/ENSMUSG00000030043/ENSMUSG00000036564/ENSMUSG00000026959/ENSMUSG00000050541/ENSMUSG00000038738/ENSMUSG00000051331/ENSMUSG00000032532/ENSMUSG00000027210/ENSMUSG00000037032/ENSMUSG00000040907/…	25
239	Down	GO:0010970	transport along microtubule	64/1598	427/21087	1.15E-07	3.80505E-06	3.25264E-06	ENSMUSG00000006435/ENSMUSG00000029223/ENSMUSG00000033862/ENSMUSG00000024065/ENSMUSG00000027254/ENSMUSG00000024873/ENSMUSG00000057531/ENSMUSG00000040687/ENSMUSG00000024163/ENSMUSG00000006930/ENSMUSG00000029053/ENSMUSG00000090100/ENSMUSG00000058230/ENSMUSG00000025920/ENSMUSG00000036825/ENSMUSG00000021288/ENSMUSG00000020396/ENSMUSG00000028975/ENSMUSG00000037351/ENSMUSG00000030397/ENSMUSG00000047766/…	64
240	Down	GO:1901888	regulation of cell junction assembly	38/1598	200/21087	1.17E-07	3.84642E-06	3.288E-06	ENSMUSG00000060780/ENSMUSG00000059146/ENSMUSG00000032537/ENSMUSG00000005469/ENSMUSG00000039953/ENSMUSG00000042700/ENSMUSG00000031654/ENSMUSG00000034730/ENSMUSG00000026697/ENSMUSG00000025582/ENSMUSG00000032011/ENSMUSG00000051149/ENSMUSG00000069255/ENSMUSG00000042589/ENSMUSG00000051790/ENSMUSG00000025656/ENSMUSG00000013033/ENSMUSG00000008153/ENSMUSG00000022099/ENSMUSG00000025920/ENSMUSG00000026959/…	38
241	Down	GO:0017158	regulation of calcium ion-dependent exocytosis	16/1598	46/21087	1.22E-07	4.00165E-06	3.42069E-06	ENSMUSG00000047507/ENSMUSG00000026797/ENSMUSG00000030731/ENSMUSG00000024743/ENSMUSG00000040722/ENSMUSG00000050556/ENSMUSG00000027220/ENSMUSG00000026452/ENSMUSG00000020894/ENSMUSG00000034656/ENSMUSG00000090071/ENSMUSG00000052301/ENSMUSG00000020866/ENSMUSG00000022416/ENSMUSG00000054423/ENSMUSG00000035640	16
242	Down	GO:0007613	memory	31/1598	146/21087	1.29E-07	4.20312E-06	3.59291E-06	ENSMUSG00000033208/ENSMUSG00000034997/ENSMUSG00000030209/ENSMUSG00000003575/ENSMUSG00000023017/ENSMUSG00000022623/ENSMUSG00000018634/ENSMUSG00000028991/ENSMUSG00000051149/ENSMUSG00000027254/ENSMUSG00000042589/ENSMUSG00000001507/ENSMUSG00000027273/ENSMUSG00000040136/ENSMUSG00000074923/ENSMUSG00000025318/ENSMUSG00000079055/ENSMUSG00000030043/ENSMUSG00000063434/ENSMUSG00000029053/ENSMUSG00000026959/…	31
243	Down	GO:0030705	cytoskeleton-dependent intracellular transport	65/1598	438/21087	1.34E-07	4.32582E-06	3.6978E-06	ENSMUSG00000006435/ENSMUSG00000029223/ENSMUSG00000033862/ENSMUSG00000024065/ENSMUSG00000027254/ENSMUSG00000024873/ENSMUSG00000057531/ENSMUSG00000040687/ENSMUSG00000024163/ENSMUSG00000006930/ENSMUSG00000029053/ENSMUSG00000090100/ENSMUSG00000058230/ENSMUSG00000025920/ENSMUSG00000041794/ENSMUSG00000036825/ENSMUSG00000021288/ENSMUSG00000020396/ENSMUSG00000028975/ENSMUSG00000037351/ENSMUSG00000030397/…	65
244	Down	GO:0010324	membrane invagination	77/1598	552/21087	1.34E-07	4.32582E-06	3.6978E-06	ENSMUSG00000050148/ENSMUSG00000019146/ENSMUSG00000026825/ENSMUSG00000042249/ENSMUSG00000021816/ENSMUSG00000060780/ENSMUSG00000020886/ENSMUSG00000025499/ENSMUSG00000024743/ENSMUSG00000037010/ENSMUSG00000003345/ENSMUSG00000023328/ENSMUSG00000034730/ENSMUSG00000024858/ENSMUSG00000074238/ENSMUSG00000024065/ENSMUSG00000025793/ENSMUSG00000031144/ENSMUSG00000031837/ENSMUSG00000040722/ENSMUSG00000001986/…	77
245	Down	GO:0097107	postsynaptic density assembly	11/1598	22/21087	1.48E-07	4.74675E-06	4.05762E-06	ENSMUSG00000060780/ENSMUSG00000059146/ENSMUSG00000022623/ENSMUSG00000042700/ENSMUSG00000031654/ENSMUSG00000025582/ENSMUSG00000051790/ENSMUSG00000038738/ENSMUSG00000030600/ENSMUSG00000047085/ENSMUSG00000033768	11
246	Down	GO:0051965	positive regulation of synapse assembly	21/1598	77/21087	1.67E-07	5.3375E-06	4.56261E-06	ENSMUSG00000060780/ENSMUSG00000059146/ENSMUSG00000032537/ENSMUSG00000039953/ENSMUSG00000031654/ENSMUSG00000034730/ENSMUSG00000051149/ENSMUSG00000042589/ENSMUSG00000051790/ENSMUSG00000013033/ENSMUSG00000008153/ENSMUSG00000025920/ENSMUSG00000028782/ENSMUSG00000033707/ENSMUSG00000048304/ENSMUSG00000042846/ENSMUSG00000047085/ENSMUSG00000074736/ENSMUSG00000044505/ENSMUSG00000033214/ENSMUSG00000050947	21
247	Down	GO:0009653	anatomical structure morphogenesis	278/1598	2757/21087	1.67E-07	5.3375E-06	4.56261E-06	ENSMUSG00000066392/ENSMUSG00000017737/ENSMUSG00000020099/ENSMUSG00000032336/ENSMUSG00000036585/ENSMUSG00000033208/ENSMUSG00000025407/ENSMUSG00000028546/ENSMUSG00000022619/ENSMUSG00000050132/ENSMUSG00000048895/ENSMUSG00000026797/ENSMUSG00000057897/ENSMUSG00000021816/ENSMUSG00000025151/ENSMUSG00000029167/ENSMUSG00000020366/ENSMUSG00000041670/ENSMUSG00000059146/ENSMUSG00000032537/ENSMUSG00000031840/…	278
248	Down	GO:0006928	movement of cell or subcellular component	230/1598	2203/21087	1.72E-07	5.45062E-06	4.6593E-06	ENSMUSG00000017737/ENSMUSG00000020099/ENSMUSG00000032336/ENSMUSG00000036585/ENSMUSG00000024277/ENSMUSG00000042429/ENSMUSG00000025407/ENSMUSG00000048895/ENSMUSG00000057897/ENSMUSG00000029167/ENSMUSG00000059146/ENSMUSG00000032537/ENSMUSG00000006435/ENSMUSG00000019997/ENSMUSG00000022812/ENSMUSG00000025499/ENSMUSG00000021313/ENSMUSG00000020135/ENSMUSG00000029223/ENSMUSG00000025427/ENSMUSG00000038264/…	230
249	Down	GO:0035249	synaptic transmission, glutamatergic	25/1598	105/21087	2.10E-07	6.64547E-06	5.68068E-06	ENSMUSG00000042429/ENSMUSG00000022619/ENSMUSG00000034997/ENSMUSG00000026797/ENSMUSG00000019146/ENSMUSG00000005469/ENSMUSG00000022623/ENSMUSG00000019828/ENSMUSG00000041078/ENSMUSG00000027438/ENSMUSG00000024873/ENSMUSG00000051790/ENSMUSG00000057531/ENSMUSG00000003378/ENSMUSG00000008153/ENSMUSG00000041115/ENSMUSG00000026959/ENSMUSG00000006024/ENSMUSG00000030898/ENSMUSG00000032017/ENSMUSG00000002771/…	25
250	Down	GO:0045597	positive regulation of cell differentiation	131/1598	1111/21087	2.13E-07	6.70933E-06	5.73528E-06	ENSMUSG00000020891/ENSMUSG00000028546/ENSMUSG00000034997/ENSMUSG00000057897/ENSMUSG00000020366/ENSMUSG00000003575/ENSMUSG00000041670/ENSMUSG00000059146/ENSMUSG00000006435/ENSMUSG00000019997/ENSMUSG00000024777/ENSMUSG00000035863/ENSMUSG00000020886/ENSMUSG00000022812/ENSMUSG00000030731/ENSMUSG00000000552/ENSMUSG00000038264/ENSMUSG00000022623/ENSMUSG00000028991/ENSMUSG00000008734/ENSMUSG00000061393/…	131
251	Down	GO:0006897	endocytosis	75/1598	543/21087	2.89E-07	9.06662E-06	7.75033E-06	ENSMUSG00000050148/ENSMUSG00000019146/ENSMUSG00000026825/ENSMUSG00000042249/ENSMUSG00000021816/ENSMUSG00000060780/ENSMUSG00000020886/ENSMUSG00000025499/ENSMUSG00000024743/ENSMUSG00000037010/ENSMUSG00000003345/ENSMUSG00000023328/ENSMUSG00000034730/ENSMUSG00000024858/ENSMUSG00000074238/ENSMUSG00000024065/ENSMUSG00000031144/ENSMUSG00000031837/ENSMUSG00000040722/ENSMUSG00000001986/ENSMUSG00000027438/…	75
252	Down	GO:0007017	microtubule-based process	119/1598	990/21087	2.90E-07	9.06662E-06	7.75033E-06	ENSMUSG00000024277/ENSMUSG00000048895/ENSMUSG00000006435/ENSMUSG00000022812/ENSMUSG00000020135/ENSMUSG00000029223/ENSMUSG00000053046/ENSMUSG00000035390/ENSMUSG00000033862/ENSMUSG00000024065/ENSMUSG00000027254/ENSMUSG00000024873/ENSMUSG00000027581/ENSMUSG00000057531/ENSMUSG00000057177/ENSMUSG00000040687/ENSMUSG00000024163/ENSMUSG00000006930/ENSMUSG00000030043/ENSMUSG00000029053/ENSMUSG00000090100/…	119
253	Down	GO:0051094	positive regulation of developmental process	171/1598	1556/21087	3.38E-07	1.05429E-05	9.01226E-06	ENSMUSG00000017737/ENSMUSG00000020891/ENSMUSG00000036585/ENSMUSG00000033208/ENSMUSG00000025407/ENSMUSG00000028546/ENSMUSG00000034997/ENSMUSG00000057897/ENSMUSG00000025151/ENSMUSG00000029167/ENSMUSG00000020366/ENSMUSG00000003575/ENSMUSG00000041670/ENSMUSG00000060780/ENSMUSG00000059146/ENSMUSG00000032537/ENSMUSG00000006435/ENSMUSG00000019997/ENSMUSG00000024777/ENSMUSG00000035863/ENSMUSG00000020886/…	171
254	Down	GO:0006900	vesicle budding from membrane	79/1598	585/21087	3.56E-07	1.10525E-05	9.44791E-06	ENSMUSG00000050148/ENSMUSG00000019146/ENSMUSG00000026825/ENSMUSG00000042249/ENSMUSG00000021816/ENSMUSG00000060780/ENSMUSG00000020886/ENSMUSG00000025499/ENSMUSG00000024743/ENSMUSG00000037010/ENSMUSG00000003345/ENSMUSG00000023328/ENSMUSG00000034730/ENSMUSG00000024858/ENSMUSG00000074238/ENSMUSG00000024065/ENSMUSG00000031144/ENSMUSG00000031837/ENSMUSG00000040722/ENSMUSG00000001986/ENSMUSG00000027438/…	79
255	Down	GO:0051493	regulation of cytoskeleton organization	75/1598	546/21087	3.60E-07	1.11372E-05	9.52035E-06	ENSMUSG00000024277/ENSMUSG00000048895/ENSMUSG00000059146/ENSMUSG00000019997/ENSMUSG00000059981/ENSMUSG00000022812/ENSMUSG00000025499/ENSMUSG00000020135/ENSMUSG00000022623/ENSMUSG00000028991/ENSMUSG00000033862/ENSMUSG00000026697/ENSMUSG00000074238/ENSMUSG00000027254/ENSMUSG00000050357/ENSMUSG00000027581/ENSMUSG00000045038/ENSMUSG00000027805/ENSMUSG00000057177/ENSMUSG00000033389/ENSMUSG00000030043/…	75
256	Down	GO:0007215	glutamate receptor signaling pathway	23/1598	94/21087	3.77E-07	1.16165E-05	9.93005E-06	ENSMUSG00000021708/ENSMUSG00000022619/ENSMUSG00000048895/ENSMUSG00000030209/ENSMUSG00000019146/ENSMUSG00000029167/ENSMUSG00000020886/ENSMUSG00000022623/ENSMUSG00000032356/ENSMUSG00000019828/ENSMUSG00000028756/ENSMUSG00000029608/ENSMUSG00000031837/ENSMUSG00000025813/ENSMUSG00000024873/ENSMUSG00000051790/ENSMUSG00000050556/ENSMUSG00000026959/ENSMUSG00000022602/ENSMUSG00000063239/ENSMUSG00000038738/…	23
257	Down	GO:0050432	catecholamine secretion	20/1598	74/21087	3.85E-07	1.17936E-05	1.00814E-05	ENSMUSG00000023064/ENSMUSG00000034997/ENSMUSG00000027577/ENSMUSG00000030731/ENSMUSG00000024743/ENSMUSG00000018634/ENSMUSG00000090223/ENSMUSG00000028756/ENSMUSG00000024858/ENSMUSG00000021647/ENSMUSG00000021194/ENSMUSG00000057531/ENSMUSG00000050556/ENSMUSG00000040724/ENSMUSG00000024462/ENSMUSG00000027220/ENSMUSG00000057880/ENSMUSG00000026452/ENSMUSG00000039059/ENSMUSG00000054423	20
258	Down	GO:1903827	regulation of cellular protein localization	75/1598	547/21087	3.87E-07	1.18351E-05	1.01168E-05	ENSMUSG00000048895/ENSMUSG00000019146/ENSMUSG00000057897/ENSMUSG00000025151/ENSMUSG00000005469/ENSMUSG00000022812/ENSMUSG00000025499/ENSMUSG00000021567/ENSMUSG00000022623/ENSMUSG00000020657/ENSMUSG00000051343/ENSMUSG00000028756/ENSMUSG00000030098/ENSMUSG00000027254/ENSMUSG00000096146/ENSMUSG00000031837/ENSMUSG00000033170/ENSMUSG00000049551/ENSMUSG00000030854/ENSMUSG00000001507/ENSMUSG00000051790/…	75
259	Down	GO:0030029	actin filament-based process	96/1598	757/21087	3.94E-07	1.19899E-05	1.02492E-05	ENSMUSG00000042429/ENSMUSG00000048895/ENSMUSG00000059146/ENSMUSG00000019997/ENSMUSG00000059981/ENSMUSG00000040797/ENSMUSG00000025499/ENSMUSG00000021313/ENSMUSG00000022623/ENSMUSG00000029673/ENSMUSG00000028991/ENSMUSG00000053046/ENSMUSG00000042700/ENSMUSG00000033862/ENSMUSG00000034730/ENSMUSG00000026697/ENSMUSG00000074238/ENSMUSG00000061603/ENSMUSG00000030685/ENSMUSG00000050357/ENSMUSG00000045038/…	96
260	Down	GO:0006941	striated muscle contraction	32/1598	161/21087	4.00E-07	1.21221E-05	1.03622E-05	ENSMUSG00000042429/ENSMUSG00000019997/ENSMUSG00000021313/ENSMUSG00000028991/ENSMUSG00000024962/ENSMUSG00000024858/ENSMUSG00000024065/ENSMUSG00000061603/ENSMUSG00000021194/ENSMUSG00000020635/ENSMUSG00000079055/ENSMUSG00000028854/ENSMUSG00000029361/ENSMUSG00000050541/ENSMUSG00000071657/ENSMUSG00000025579/ENSMUSG00000019194/ENSMUSG00000021983/ENSMUSG00000051331/ENSMUSG00000038319/ENSMUSG00000020866/…	32
261	Down	GO:0031630	regulation of synaptic vesicle fusion to presynaptic active zone membrane	8/1598	12/21087	4.01E-07	1.21225E-05	1.03626E-05	ENSMUSG00000031840/ENSMUSG00000024743/ENSMUSG00000033615/ENSMUSG00000025867/ENSMUSG00000003378/ENSMUSG00000045114/ENSMUSG00000030337/ENSMUSG00000026452	8
262	Down	GO:0048518	positive regulation of biological process	550/1598	6106/21087	4.65E-07	1.39633E-05	1.19361E-05	ENSMUSG00000017737/ENSMUSG00000020099/ENSMUSG00000020891/ENSMUSG00000036585/ENSMUSG00000024277/ENSMUSG00000042429/ENSMUSG00000047507/ENSMUSG00000033208/ENSMUSG00000050148/ENSMUSG00000021708/ENSMUSG00000025407/ENSMUSG00000035953/ENSMUSG00000027223/ENSMUSG00000072214/ENSMUSG00000027584/ENSMUSG00000028546/ENSMUSG00000022619/ENSMUSG00000017897/ENSMUSG00000006575/ENSMUSG00000034997/ENSMUSG00000048895/…	550
263	Down	GO:0098657	import into cell	39/1598	219/21087	4.66E-07	1.39633E-05	1.19361E-05	ENSMUSG00000028542/ENSMUSG00000019146/ENSMUSG00000026825/ENSMUSG00000096146/ENSMUSG00000030310/ENSMUSG00000027273/ENSMUSG00000048142/ENSMUSG00000079055/ENSMUSG00000006930/ENSMUSG00000009292/ENSMUSG00000028854/ENSMUSG00000029361/ENSMUSG00000022602/ENSMUSG00000037989/ENSMUSG00000003411/ENSMUSG00000007021/ENSMUSG00000028785/ENSMUSG00000032883/ENSMUSG00000017740/ENSMUSG00000040276/ENSMUSG00000020333/…	39
264	Down	GO:0010959	regulation of metal ion transport	62/1598	425/21087	4.75E-07	1.41827E-05	1.21237E-05	ENSMUSG00000042429/ENSMUSG00000027584/ENSMUSG00000031748/ENSMUSG00000034997/ENSMUSG00000021313/ENSMUSG00000019699/ENSMUSG00000018634/ENSMUSG00000032011/ENSMUSG00000024065/ENSMUSG00000061603/ENSMUSG00000025813/ENSMUSG00000045038/ENSMUSG00000020635/ENSMUSG00000040136/ENSMUSG00000025318/ENSMUSG00000006930/ENSMUSG00000004035/ENSMUSG00000028854/ENSMUSG00000027030/ENSMUSG00000029361/ENSMUSG00000026959/…	62
265	Down	GO:0032880	regulation of protein localization	126/1598	1074/21087	4.81E-07	1.42634E-05	1.21926E-05	ENSMUSG00000032336/ENSMUSG00000020891/ENSMUSG00000047507/ENSMUSG00000021684/ENSMUSG00000048895/ENSMUSG00000037012/ENSMUSG00000019146/ENSMUSG00000057897/ENSMUSG00000021816/ENSMUSG00000025151/ENSMUSG00000058441/ENSMUSG00000005469/ENSMUSG00000022812/ENSMUSG00000025499/ENSMUSG00000022840/ENSMUSG00000024743/ENSMUSG00000021567/ENSMUSG00000022623/ENSMUSG00000020657/ENSMUSG00000029073/ENSMUSG00000053046/…	126
266	Down	GO:0048878	chemical homeostasis	137/1598	1192/21087	4.82E-07	1.42634E-05	1.21926E-05	ENSMUSG00000032336/ENSMUSG00000042429/ENSMUSG00000047507/ENSMUSG00000033208/ENSMUSG00000021684/ENSMUSG00000027584/ENSMUSG00000034997/ENSMUSG00000037012/ENSMUSG00000030209/ENSMUSG00000003657/ENSMUSG00000020734/ENSMUSG00000021816/ENSMUSG00000005469/ENSMUSG00000020886/ENSMUSG00000039953/ENSMUSG00000022840/ENSMUSG00000021313/ENSMUSG00000030666/ENSMUSG00000078566/ENSMUSG00000018634/ENSMUSG00000053046/…	137
267	Down	GO:0033043	regulation of organelle organization	143/1598	1257/21087	4.83E-07	1.42634E-05	1.21926E-05	ENSMUSG00000017737/ENSMUSG00000024277/ENSMUSG00000050148/ENSMUSG00000048895/ENSMUSG00000026797/ENSMUSG00000057897/ENSMUSG00000029167/ENSMUSG00000020366/ENSMUSG00000060780/ENSMUSG00000059146/ENSMUSG00000031840/ENSMUSG00000019997/ENSMUSG00000059981/ENSMUSG00000022812/ENSMUSG00000025499/ENSMUSG00000030731/ENSMUSG00000020135/ENSMUSG00000024743/ENSMUSG00000022623/ENSMUSG00000029673/ENSMUSG00000078566/…	143
268	Down	GO:0048588	developmental cell growth	44/1598	262/21087	4.86E-07	1.42924E-05	1.22174E-05	ENSMUSG00000048895/ENSMUSG00000041670/ENSMUSG00000059146/ENSMUSG00000022812/ENSMUSG00000030731/ENSMUSG00000038264/ENSMUSG00000029673/ENSMUSG00000028991/ENSMUSG00000033618/ENSMUSG00000020340/ENSMUSG00000051149/ENSMUSG00000061603/ENSMUSG00000057177/ENSMUSG00000029512/ENSMUSG00000033352/ENSMUSG00000029053/ENSMUSG00000026452/ENSMUSG00000062991/ENSMUSG00000050541/ENSMUSG00000023951/ENSMUSG00000039114/…	44
269	Down	GO:0099173	postsynapse organization	36/1598	195/21087	5.19E-07	1.51513E-05	1.29517E-05	ENSMUSG00000048895/ENSMUSG00000030209/ENSMUSG00000057897/ENSMUSG00000060780/ENSMUSG00000059146/ENSMUSG00000032537/ENSMUSG00000020886/ENSMUSG00000022623/ENSMUSG00000042700/ENSMUSG00000031654/ENSMUSG00000034730/ENSMUSG00000025582/ENSMUSG00000029608/ENSMUSG00000030098/ENSMUSG00000042589/ENSMUSG00000049551/ENSMUSG00000001507/ENSMUSG00000051790/ENSMUSG00000025656/ENSMUSG00000057531/ENSMUSG00000033389/…	36
270	Down	GO:1990138	neuron projection extension	36/1598	195/21087	5.19E-07	1.51513E-05	1.29517E-05	ENSMUSG00000048895/ENSMUSG00000041670/ENSMUSG00000059146/ENSMUSG00000022812/ENSMUSG00000030731/ENSMUSG00000038264/ENSMUSG00000029673/ENSMUSG00000033618/ENSMUSG00000020340/ENSMUSG00000051149/ENSMUSG00000029512/ENSMUSG00000029053/ENSMUSG00000026452/ENSMUSG00000062991/ENSMUSG00000023951/ENSMUSG00000039114/ENSMUSG00000029674/ENSMUSG00000004892/ENSMUSG00000000627/ENSMUSG00000022212/ENSMUSG00000029291/…	36
271	Down	GO:0098698	postsynaptic specialization assembly	12/1598	29/21087	5.29E-07	1.53312E-05	1.31054E-05	ENSMUSG00000060780/ENSMUSG00000059146/ENSMUSG00000022623/ENSMUSG00000042700/ENSMUSG00000031654/ENSMUSG00000025582/ENSMUSG00000051790/ENSMUSG00000025656/ENSMUSG00000038738/ENSMUSG00000030600/ENSMUSG00000047085/ENSMUSG00000033768	12
272	Down	GO:1904861	excitatory synapse assembly	12/1598	29/21087	5.29E-07	1.53312E-05	1.31054E-05	ENSMUSG00000032336/ENSMUSG00000060780/ENSMUSG00000059146/ENSMUSG00000022623/ENSMUSG00000042700/ENSMUSG00000031654/ENSMUSG00000025582/ENSMUSG00000051790/ENSMUSG00000038738/ENSMUSG00000030600/ENSMUSG00000047085/ENSMUSG00000033768	12
273	Down	GO:0051899	membrane depolarization	21/1598	82/21087	5.31E-07	1.53348E-05	1.31085E-05	ENSMUSG00000019146/ENSMUSG00000027577/ENSMUSG00000026697/ENSMUSG00000025190/ENSMUSG00000029053/ENSMUSG00000054428/ENSMUSG00000053192/ENSMUSG00000034656/ENSMUSG00000069601/ENSMUSG00000019194/ENSMUSG00000051331/ENSMUSG00000032532/ENSMUSG00000038319/ENSMUSG00000020866/ENSMUSG00000022416/ENSMUSG00000032338/ENSMUSG00000070304/ENSMUSG00000064329/ENSMUSG00000023033/ENSMUSG00000046480/ENSMUSG00000049281	21
274	Down	GO:1901890	positive regulation of cell junction assembly	25/1598	110/21087	5.41E-07	1.55741E-05	1.3313E-05	ENSMUSG00000060780/ENSMUSG00000059146/ENSMUSG00000032537/ENSMUSG00000039953/ENSMUSG00000031654/ENSMUSG00000034730/ENSMUSG00000026697/ENSMUSG00000032011/ENSMUSG00000051149/ENSMUSG00000042589/ENSMUSG00000051790/ENSMUSG00000013033/ENSMUSG00000008153/ENSMUSG00000025920/ENSMUSG00000023951/ENSMUSG00000028782/ENSMUSG00000033707/ENSMUSG00000048304/ENSMUSG00000026181/ENSMUSG00000042846/ENSMUSG00000047085/…	25
275	Down	GO:0051937	catecholamine transport	22/1598	89/21087	5.57E-07	1.59509E-05	1.36351E-05	ENSMUSG00000023064/ENSMUSG00000034997/ENSMUSG00000027577/ENSMUSG00000030731/ENSMUSG00000024743/ENSMUSG00000018634/ENSMUSG00000090223/ENSMUSG00000028756/ENSMUSG00000024858/ENSMUSG00000021647/ENSMUSG00000048142/ENSMUSG00000021194/ENSMUSG00000057531/ENSMUSG00000050556/ENSMUSG00000040724/ENSMUSG00000024462/ENSMUSG00000027220/ENSMUSG00000057880/ENSMUSG00000026452/ENSMUSG00000003411/ENSMUSG00000039059/…	22
276	Down	GO:0043270	positive regulation of ion transport	51/1598	326/21087	5.95E-07	1.69781E-05	1.45133E-05	ENSMUSG00000042429/ENSMUSG00000026797/ENSMUSG00000030209/ENSMUSG00000019146/ENSMUSG00000020366/ENSMUSG00000027577/ENSMUSG00000021313/ENSMUSG00000022623/ENSMUSG00000019699/ENSMUSG00000090223/ENSMUSG00000032011/ENSMUSG00000028756/ENSMUSG00000024065/ENSMUSG00000061603/ENSMUSG00000096146/ENSMUSG00000030310/ENSMUSG00000048142/ENSMUSG00000057531/ENSMUSG00000049422/ENSMUSG00000040136/ENSMUSG00000006930/…	51
277	Down	GO:0003012	muscle system process	59/1598	400/21087	6.17E-07	1.75645E-05	1.50145E-05	ENSMUSG00000042429/ENSMUSG00000034997/ENSMUSG00000019997/ENSMUSG00000022812/ENSMUSG00000021313/ENSMUSG00000028991/ENSMUSG00000024962/ENSMUSG00000026697/ENSMUSG00000030669/ENSMUSG00000024858/ENSMUSG00000024065/ENSMUSG00000030098/ENSMUSG00000061603/ENSMUSG00000000263/ENSMUSG00000028161/ENSMUSG00000021194/ENSMUSG00000020635/ENSMUSG00000057177/ENSMUSG00000040136/ENSMUSG00000079055/ENSMUSG00000030043/…	59
278	Down	GO:0050789	regulation of biological process	959/1598	11428/21087	6.23E-07	1.765E-05	1.50876E-05	ENSMUSG00000066392/ENSMUSG00000017737/ENSMUSG00000020099/ENSMUSG00000032336/ENSMUSG00000020891/ENSMUSG00000036585/ENSMUSG00000024277/ENSMUSG00000042429/ENSMUSG00000047507/ENSMUSG00000024524/ENSMUSG00000033208/ENSMUSG00000021684/ENSMUSG00000027895/ENSMUSG00000024186/ENSMUSG00000050148/ENSMUSG00000021708/ENSMUSG00000025407/ENSMUSG00000023064/ENSMUSG00000035953/ENSMUSG00000027223/ENSMUSG00000072214/…	959
279	Down	GO:0022603	regulation of anatomical structure morphogenesis	127/1598	1090/21087	6.26E-07	1.7684E-05	1.51167E-05	ENSMUSG00000017737/ENSMUSG00000036585/ENSMUSG00000033208/ENSMUSG00000025407/ENSMUSG00000050132/ENSMUSG00000048895/ENSMUSG00000057897/ENSMUSG00000025151/ENSMUSG00000029167/ENSMUSG00000020366/ENSMUSG00000041670/ENSMUSG00000059146/ENSMUSG00000059981/ENSMUSG00000035863/ENSMUSG00000020886/ENSMUSG00000022812/ENSMUSG00000030731/ENSMUSG00000038264/ENSMUSG00000022623/ENSMUSG00000019699/ENSMUSG00000078566/…	127
280	Down	GO:1902904	negative regulation of supramolecular fiber organization	30/1598	149/21087	6.84E-07	1.92587E-05	1.64627E-05	ENSMUSG00000020135/ENSMUSG00000022623/ENSMUSG00000026697/ENSMUSG00000027254/ENSMUSG00000050357/ENSMUSG00000027805/ENSMUSG00000090100/ENSMUSG00000022099/ENSMUSG00000032827/ENSMUSG00000038738/ENSMUSG00000030000/ENSMUSG00000041729/ENSMUSG00000033788/ENSMUSG00000062591/ENSMUSG00000030357/ENSMUSG00000034295/ENSMUSG00000034570/ENSMUSG00000064302/ENSMUSG00000015222/ENSMUSG00000021061/ENSMUSG00000040811/…	30
281	Down	GO:0007411	axon guidance	42/1598	248/21087	6.98E-07	1.95637E-05	1.67235E-05	ENSMUSG00000020099/ENSMUSG00000032336/ENSMUSG00000048895/ENSMUSG00000032537/ENSMUSG00000025427/ENSMUSG00000038264/ENSMUSG00000059857/ENSMUSG00000020340/ENSMUSG00000056486/ENSMUSG00000021466/ENSMUSG00000024163/ENSMUSG00000022883/ENSMUSG00000058230/ENSMUSG00000023951/ENSMUSG00000025876/ENSMUSG00000028039/ENSMUSG00000069601/ENSMUSG00000039103/ENSMUSG00000023473/ENSMUSG00000019194/ENSMUSG00000000627/…	42
282	Down	GO:0070997	neuron death	60/1598	411/21087	7.07E-07	1.97596E-05	1.68909E-05	ENSMUSG00000020099/ENSMUSG00000042429/ENSMUSG00000023064/ENSMUSG00000050132/ENSMUSG00000048895/ENSMUSG00000026797/ENSMUSG00000030209/ENSMUSG00000029167/ENSMUSG00000032537/ENSMUSG00000022812/ENSMUSG00000025499/ENSMUSG00000078566/ENSMUSG00000018634/ENSMUSG00000028991/ENSMUSG00000024962/ENSMUSG00000023328/ENSMUSG00000006476/ENSMUSG00000090223/ENSMUSG00000028756/ENSMUSG00000051149/ENSMUSG00000049551/…	60
283	Down	GO:0006936	muscle contraction	47/1598	292/21087	7.12E-07	1.98371E-05	1.69571E-05	ENSMUSG00000042429/ENSMUSG00000034997/ENSMUSG00000019997/ENSMUSG00000021313/ENSMUSG00000028991/ENSMUSG00000024962/ENSMUSG00000030669/ENSMUSG00000024858/ENSMUSG00000024065/ENSMUSG00000030098/ENSMUSG00000061603/ENSMUSG00000000263/ENSMUSG00000021194/ENSMUSG00000020635/ENSMUSG00000079055/ENSMUSG00000030043/ENSMUSG00000028854/ENSMUSG00000029361/ENSMUSG00000057880/ENSMUSG00000050541/ENSMUSG00000071657/…	47
284	Down	GO:0072521	purine-containing compound metabolic process	65/1598	459/21087	7.39E-07	2.0517E-05	1.75383E-05	ENSMUSG00000034997/ENSMUSG00000037012/ENSMUSG00000029167/ENSMUSG00000022840/ENSMUSG00000005580/ENSMUSG00000028756/ENSMUSG00000038967/ENSMUSG00000049422/ENSMUSG00000029361/ENSMUSG00000020431/ENSMUSG00000030302/ENSMUSG00000035011/ENSMUSG00000059734/ENSMUSG00000028785/ENSMUSG00000003072/ENSMUSG00000032294/ENSMUSG00000028982/ENSMUSG00000038028/ENSMUSG00000006057/ENSMUSG00000021255/ENSMUSG00000024151/…	65
285	Down	GO:0031111	negative regulation of microtubule polymerization or depolymerization	15/1598	46/21087	7.89E-07	2.18159E-05	1.86487E-05	ENSMUSG00000020135/ENSMUSG00000027254/ENSMUSG00000090100/ENSMUSG00000033788/ENSMUSG00000062591/ENSMUSG00000030357/ENSMUSG00000034570/ENSMUSG00000064302/ENSMUSG00000015222/ENSMUSG00000040811/ENSMUSG00000044117/ENSMUSG00000044433/ENSMUSG00000027500/ENSMUSG00000013921/ENSMUSG00000052727	15
286	Down	GO:0019226	transmission of nerve impulse	22/1598	91/21087	8.39E-07	2.31099E-05	1.97548E-05	ENSMUSG00000027895/ENSMUSG00000019146/ENSMUSG00000059146/ENSMUSG00000000263/ENSMUSG00000021647/ENSMUSG00000020635/ENSMUSG00000040724/ENSMUSG00000034656/ENSMUSG00000017167/ENSMUSG00000069601/ENSMUSG00000019194/ENSMUSG00000011751/ENSMUSG00000063142/ENSMUSG00000047976/ENSMUSG00000005950/ENSMUSG00000020866/ENSMUSG00000030739/ENSMUSG00000022416/ENSMUSG00000016346/ENSMUSG00000061576/ENSMUSG00000064329/…	22
287	Down	GO:0097485	neuron projection guidance	42/1598	250/21087	8.69E-07	2.38528E-05	2.03898E-05	ENSMUSG00000020099/ENSMUSG00000032336/ENSMUSG00000048895/ENSMUSG00000032537/ENSMUSG00000025427/ENSMUSG00000038264/ENSMUSG00000059857/ENSMUSG00000020340/ENSMUSG00000056486/ENSMUSG00000021466/ENSMUSG00000024163/ENSMUSG00000022883/ENSMUSG00000058230/ENSMUSG00000023951/ENSMUSG00000025876/ENSMUSG00000028039/ENSMUSG00000069601/ENSMUSG00000039103/ENSMUSG00000023473/ENSMUSG00000019194/ENSMUSG00000000627/…	42
288	Down	GO:0050433	regulation of catecholamine secretion	19/1598	71/21087	8.83E-07	2.41644E-05	2.06562E-05	ENSMUSG00000023064/ENSMUSG00000034997/ENSMUSG00000027577/ENSMUSG00000030731/ENSMUSG00000024743/ENSMUSG00000018634/ENSMUSG00000090223/ENSMUSG00000028756/ENSMUSG00000024858/ENSMUSG00000021647/ENSMUSG00000021194/ENSMUSG00000057531/ENSMUSG00000050556/ENSMUSG00000040724/ENSMUSG00000024462/ENSMUSG00000027220/ENSMUSG00000057880/ENSMUSG00000026452/ENSMUSG00000039059	19
289	Down	GO:0019637	organophosphate metabolic process	110/1598	917/21087	9.13E-07	2.49015E-05	2.12863E-05	ENSMUSG00000035953/ENSMUSG00000034997/ENSMUSG00000037012/ENSMUSG00000042249/ENSMUSG00000029167/ENSMUSG00000022840/ENSMUSG00000005580/ENSMUSG00000028756/ENSMUSG00000038967/ENSMUSG00000049422/ENSMUSG00000042105/ENSMUSG00000029361/ENSMUSG00000020431/ENSMUSG00000030302/ENSMUSG00000035011/ENSMUSG00000059734/ENSMUSG00000028785/ENSMUSG00000032883/ENSMUSG00000003072/ENSMUSG00000032294/ENSMUSG00000028982/…	110
290	Down	GO:0031623	receptor internalization	27/1598	128/21087	9.38E-07	2.54335E-05	2.1741E-05	ENSMUSG00000050148/ENSMUSG00000019146/ENSMUSG00000026825/ENSMUSG00000042249/ENSMUSG00000060780/ENSMUSG00000020886/ENSMUSG00000037010/ENSMUSG00000023328/ENSMUSG00000024858/ENSMUSG00000031837/ENSMUSG00000027438/ENSMUSG00000034187/ENSMUSG00000030854/ENSMUSG00000027273/ENSMUSG00000057531/ENSMUSG00000029512/ENSMUSG00000006930/ENSMUSG00000022602/ENSMUSG00000023951/ENSMUSG00000028785/ENSMUSG00000037907/…	27
291	Down	GO:0051640	organelle localization	97/1598	782/21087	9.39E-07	2.54335E-05	2.1741E-05	ENSMUSG00000035953/ENSMUSG00000072214/ENSMUSG00000026797/ENSMUSG00000026825/ENSMUSG00000041670/ENSMUSG00000006435/ENSMUSG00000031840/ENSMUSG00000029223/ENSMUSG00000024948/ENSMUSG00000018634/ENSMUSG00000033862/ENSMUSG00000074238/ENSMUSG00000024065/ENSMUSG00000034187/ENSMUSG00000024873/ENSMUSG00000051790/ENSMUSG00000021194/ENSMUSG00000030805/ENSMUSG00000003863/ENSMUSG00000057531/ENSMUSG00000025867/…	97
292	Down	GO:0090150	establishment of protein localization to membrane	39/1598	225/21087	9.47E-07	2.55525E-05	2.18428E-05	ENSMUSG00000042429/ENSMUSG00000048895/ENSMUSG00000019146/ENSMUSG00000039953/ENSMUSG00000025499/ENSMUSG00000024127/ENSMUSG00000030098/ENSMUSG00000033615/ENSMUSG00000009894/ENSMUSG00000034187/ENSMUSG00000027273/ENSMUSG00000029126/ENSMUSG00000030805/ENSMUSG00000033389/ENSMUSG00000050556/ENSMUSG00000030806/ENSMUSG00000022099/ENSMUSG00000020894/ENSMUSG00000069601/ENSMUSG00000002984/ENSMUSG00000028785/…	39
293	Down	GO:0006753	nucleoside phosphate metabolic process	69/1598	501/21087	9.56E-07	2.57065E-05	2.19745E-05	ENSMUSG00000034997/ENSMUSG00000037012/ENSMUSG00000029167/ENSMUSG00000022840/ENSMUSG00000005580/ENSMUSG00000028756/ENSMUSG00000038967/ENSMUSG00000049422/ENSMUSG00000029361/ENSMUSG00000020431/ENSMUSG00000030302/ENSMUSG00000035011/ENSMUSG00000059734/ENSMUSG00000028785/ENSMUSG00000003072/ENSMUSG00000032294/ENSMUSG00000028982/ENSMUSG00000038028/ENSMUSG00000006057/ENSMUSG00000021255/ENSMUSG00000024151/…	69
294	Down	GO:0099601	regulation of neurotransmitter receptor activity	18/1598	65/21087	9.85E-07	2.63364E-05	2.25129E-05	ENSMUSG00000021708/ENSMUSG00000022619/ENSMUSG00000019146/ENSMUSG00000029167/ENSMUSG00000027577/ENSMUSG00000020886/ENSMUSG00000022623/ENSMUSG00000032356/ENSMUSG00000025582/ENSMUSG00000028756/ENSMUSG00000029608/ENSMUSG00000059991/ENSMUSG00000024873/ENSMUSG00000051790/ENSMUSG00000022594/ENSMUSG00000040867/ENSMUSG00000022602/ENSMUSG00000038738	18
295	Down	GO:0006120	mitochondrial electron transport, NADH to ubiquinone	10/1598	21/21087	9.86E-07	2.63364E-05	2.25129E-05	ENSMUSG00000028756/ENSMUSG00000059734/ENSMUSG00000026260/ENSMUSG00000025204/ENSMUSG00000022354/ENSMUSG00000025825/ENSMUSG00000071014/ENSMUSG00000024099/ENSMUSG00000037916/ENSMUSG00000064345	10
296	Down	GO:0009117	nucleotide metabolic process	68/1598	492/21087	1.00697E-06	2.68106E-05	2.29183E-05	ENSMUSG00000034997/ENSMUSG00000037012/ENSMUSG00000029167/ENSMUSG00000022840/ENSMUSG00000005580/ENSMUSG00000028756/ENSMUSG00000038967/ENSMUSG00000049422/ENSMUSG00000029361/ENSMUSG00000020431/ENSMUSG00000030302/ENSMUSG00000035011/ENSMUSG00000059734/ENSMUSG00000028785/ENSMUSG00000003072/ENSMUSG00000032294/ENSMUSG00000028982/ENSMUSG00000038028/ENSMUSG00000006057/ENSMUSG00000021255/ENSMUSG00000024151/…	68
297	Down	GO:0098815	modulation of excitatory postsynaptic potential	16/1598	53/21087	1.10183E-06	2.92375E-05	2.49928E-05	ENSMUSG00000041670/ENSMUSG00000027577/ENSMUSG00000020886/ENSMUSG00000022812/ENSMUSG00000022623/ENSMUSG00000031654/ENSMUSG00000024858/ENSMUSG00000030098/ENSMUSG00000042589/ENSMUSG00000051790/ENSMUSG00000030806/ENSMUSG00000029053/ENSMUSG00000026959/ENSMUSG00000024268/ENSMUSG00000071657/ENSMUSG00000038738	16
298	Down	GO:1900452	regulation of long-term synaptic depression	9/1598	17/21087	1.12022E-06	2.96257E-05	2.53247E-05	ENSMUSG00000042429/ENSMUSG00000022623/ENSMUSG00000031654/ENSMUSG00000050556/ENSMUSG00000063434/ENSMUSG00000041115/ENSMUSG00000025920/ENSMUSG00000032827/ENSMUSG00000022602	9
299	Down	GO:0050801	ion homeostasis	100/1598	818/21087	1.23823E-06	3.26371E-05	2.78989E-05	ENSMUSG00000032336/ENSMUSG00000042429/ENSMUSG00000033208/ENSMUSG00000027584/ENSMUSG00000034997/ENSMUSG00000030209/ENSMUSG00000003657/ENSMUSG00000020734/ENSMUSG00000020886/ENSMUSG00000039953/ENSMUSG00000022840/ENSMUSG00000021313/ENSMUSG00000030666/ENSMUSG00000078566/ENSMUSG00000018634/ENSMUSG00000019828/ENSMUSG00000026697/ENSMUSG00000030669/ENSMUSG00000032011/ENSMUSG00000031883/ENSMUSG00000038967/…	100
300	Down	GO:0060074	synapse maturation	12/1598	31/21087	1.24733E-06	3.26584E-05	2.79171E-05	ENSMUSG00000057897/ENSMUSG00000006435/ENSMUSG00000035863/ENSMUSG00000039953/ENSMUSG00000000632/ENSMUSG00000013033/ENSMUSG00000058153/ENSMUSG00000030683/ENSMUSG00000038738/ENSMUSG00000004892/ENSMUSG00000040972/ENSMUSG00000022055	12
301	Down	GO:0086010	membrane depolarization during action potential	12/1598	31/21087	1.24733E-06	3.26584E-05	2.79171E-05	ENSMUSG00000069601/ENSMUSG00000019194/ENSMUSG00000051331/ENSMUSG00000038319/ENSMUSG00000020866/ENSMUSG00000022416/ENSMUSG00000032338/ENSMUSG00000070304/ENSMUSG00000064329/ENSMUSG00000023033/ENSMUSG00000046480/ENSMUSG00000049281	12
302	Down	GO:0035235	ionotropic glutamate receptor signaling pathway	18/1598	66/21087	1.25936E-06	3.28642E-05	2.8093E-05	ENSMUSG00000021708/ENSMUSG00000022619/ENSMUSG00000048895/ENSMUSG00000030209/ENSMUSG00000019146/ENSMUSG00000029167/ENSMUSG00000020886/ENSMUSG00000022623/ENSMUSG00000032356/ENSMUSG00000028756/ENSMUSG00000029608/ENSMUSG00000024873/ENSMUSG00000051790/ENSMUSG00000026959/ENSMUSG00000022602/ENSMUSG00000038738/ENSMUSG00000035745/ENSMUSG00000040907	18
303	Down	GO:0016310	phosphorylation	225/1598	2204/21087	1.30392E-06	3.39148E-05	2.89911E-05	ENSMUSG00000017737/ENSMUSG00000036585/ENSMUSG00000042429/ENSMUSG00000027223/ENSMUSG00000022619/ENSMUSG00000034997/ENSMUSG00000048895/ENSMUSG00000000296/ENSMUSG00000037012/ENSMUSG00000019428/ENSMUSG00000030209/ENSMUSG00000057897/ENSMUSG00000042249/ENSMUSG00000021816/ENSMUSG00000025151/ENSMUSG00000029167/ENSMUSG00000020366/ENSMUSG00000032601/ENSMUSG00000059146/ENSMUSG00000032537/ENSMUSG00000006435/…	225
304	Down	GO:0007417	central nervous system development	107/1598	893/21087	1.36019E-06	3.5262E-05	3.01427E-05	ENSMUSG00000025407/ENSMUSG00000048895/ENSMUSG00000005045/ENSMUSG00000059146/ENSMUSG00000032537/ENSMUSG00000022812/ENSMUSG00000038264/ENSMUSG00000022623/ENSMUSG00000019699/ENSMUSG00000028991/ENSMUSG00000031654/ENSMUSG00000055471/ENSMUSG00000024858/ENSMUSG00000032187/ENSMUSG00000000632/ENSMUSG00000021466/ENSMUSG00000031548/ENSMUSG00000058153/ENSMUSG00000024163/ENSMUSG00000029512/ENSMUSG00000079055/…	107
305	Down	GO:0015844	monoamine transport	24/1598	108/21087	1.39614E-06	3.60752E-05	3.08379E-05	ENSMUSG00000023064/ENSMUSG00000034997/ENSMUSG00000027577/ENSMUSG00000030731/ENSMUSG00000024743/ENSMUSG00000018634/ENSMUSG00000090223/ENSMUSG00000028756/ENSMUSG00000024858/ENSMUSG00000021647/ENSMUSG00000048142/ENSMUSG00000021194/ENSMUSG00000057531/ENSMUSG00000050556/ENSMUSG00000040724/ENSMUSG00000024462/ENSMUSG00000027220/ENSMUSG00000029361/ENSMUSG00000057880/ENSMUSG00000026452/ENSMUSG00000003411/…	24
306	Down	GO:0048489	synaptic vesicle transport	15/1598	48/21087	1.45843E-06	3.75617E-05	3.21085E-05	ENSMUSG00000026825/ENSMUSG00000031840/ENSMUSG00000024873/ENSMUSG00000057531/ENSMUSG00000040687/ENSMUSG00000020198/ENSMUSG00000033419/ENSMUSG00000015222/ENSMUSG00000074657/ENSMUSG00000040265/ENSMUSG00000042766/ENSMUSG00000031367/ENSMUSG00000063801/ENSMUSG00000042992/ENSMUSG00000062444	15
307	Down	GO:0048259	regulation of receptor-mediated endocytosis	24/1598	109/21087	1.66315E-06	4.26946E-05	3.64962E-05	ENSMUSG00000050148/ENSMUSG00000060780/ENSMUSG00000020886/ENSMUSG00000037010/ENSMUSG00000031837/ENSMUSG00000027438/ENSMUSG00000034187/ENSMUSG00000030854/ENSMUSG00000057531/ENSMUSG00000006930/ENSMUSG00000022602/ENSMUSG00000023951/ENSMUSG00000022791/ENSMUSG00000028785/ENSMUSG00000037907/ENSMUSG00000033419/ENSMUSG00000060279/ENSMUSG00000028488/ENSMUSG00000040276/ENSMUSG00000034902/ENSMUSG00000022841/…	24
308	Down	GO:0050772	positive regulation of axonogenesis	23/1598	102/21087	1.75983E-06	4.50298E-05	3.84924E-05	ENSMUSG00000059146/ENSMUSG00000022812/ENSMUSG00000038264/ENSMUSG00000023328/ENSMUSG00000033618/ENSMUSG00000051149/ENSMUSG00000022883/ENSMUSG00000062991/ENSMUSG00000023951/ENSMUSG00000029674/ENSMUSG00000029291/ENSMUSG00000006057/ENSMUSG00000033419/ENSMUSG00000018736/ENSMUSG00000015291/ENSMUSG00000000305/ENSMUSG00000001313/ENSMUSG00000052727/ENSMUSG00000055407/ENSMUSG00000022055/ENSMUSG00000050947/…	23
309	Down	GO:0021695	cerebellar cortex development	17/1598	61/21087	1.77981E-06	4.53939E-05	3.88036E-05	ENSMUSG00000025407/ENSMUSG00000031654/ENSMUSG00000000632/ENSMUSG00000058153/ENSMUSG00000029512/ENSMUSG00000090100/ENSMUSG00000023011/ENSMUSG00000030683/ENSMUSG00000030302/ENSMUSG00000034656/ENSMUSG00000039137/ENSMUSG00000067889/ENSMUSG00000020900/ENSMUSG00000066129/ENSMUSG00000060240/ENSMUSG00000028541/ENSMUSG00000056596	17
310	Down	GO:0031110	regulation of microtubule polymerization or depolymerization	21/1598	88/21087	1.85712E-06	4.72128E-05	4.03584E-05	ENSMUSG00000024277/ENSMUSG00000020135/ENSMUSG00000027254/ENSMUSG00000027581/ENSMUSG00000090100/ENSMUSG00000033788/ENSMUSG00000026131/ENSMUSG00000062591/ENSMUSG00000030357/ENSMUSG00000031865/ENSMUSG00000034570/ENSMUSG00000064302/ENSMUSG00000015222/ENSMUSG00000040811/ENSMUSG00000044117/ENSMUSG00000044433/ENSMUSG00000027500/ENSMUSG00000013921/ENSMUSG00000052727/ENSMUSG00000029166/ENSMUSG00000028467	21
311	Down	GO:0016082	synaptic vesicle priming	11/1598	27/21087	1.912E-06	4.84516E-05	4.14175E-05	ENSMUSG00000026797/ENSMUSG00000041670/ENSMUSG00000031840/ENSMUSG00000009894/ENSMUSG00000027438/ENSMUSG00000027273/ENSMUSG00000030806/ENSMUSG00000030337/ENSMUSG00000006024/ENSMUSG00000038486/ENSMUSG00000054423	11
312	Down	GO:0006898	receptor-mediated endocytosis	41/1598	249/21087	1.9821E-06	5.00671E-05	4.27984E-05	ENSMUSG00000050148/ENSMUSG00000019146/ENSMUSG00000026825/ENSMUSG00000042249/ENSMUSG00000060780/ENSMUSG00000020886/ENSMUSG00000037010/ENSMUSG00000023328/ENSMUSG00000024858/ENSMUSG00000031837/ENSMUSG00000027438/ENSMUSG00000034187/ENSMUSG00000030854/ENSMUSG00000027273/ENSMUSG00000057531/ENSMUSG00000040136/ENSMUSG00000029512/ENSMUSG00000006930/ENSMUSG00000042105/ENSMUSG00000022602/ENSMUSG00000023951/…	41
313	Down	GO:0050884	neuromuscular process controlling posture	9/1598	18/21087	2.08931E-06	5.26066E-05	4.49692E-05	ENSMUSG00000000263/ENSMUSG00000026179/ENSMUSG00000045114/ENSMUSG00000017167/ENSMUSG00000025579/ENSMUSG00000021983/ENSMUSG00000020262/ENSMUSG00000064329/ENSMUSG00000050640	9
314	Down	GO:0043112	receptor metabolic process	36/1598	207/21087	2.25596E-06	5.66217E-05	4.84014E-05	ENSMUSG00000050148/ENSMUSG00000019146/ENSMUSG00000026825/ENSMUSG00000042249/ENSMUSG00000060780/ENSMUSG00000020886/ENSMUSG00000037010/ENSMUSG00000023328/ENSMUSG00000011877/ENSMUSG00000024858/ENSMUSG00000074238/ENSMUSG00000024065/ENSMUSG00000031837/ENSMUSG00000001986/ENSMUSG00000027438/ENSMUSG00000034187/ENSMUSG00000030854/ENSMUSG00000027273/ENSMUSG00000029126/ENSMUSG00000057531/ENSMUSG00000029512/…	36
315	Down	GO:0048488	synaptic vesicle endocytosis	17/1598	62/21087	2.2802E-06	5.6868E-05	4.86119E-05	ENSMUSG00000026825/ENSMUSG00000021816/ENSMUSG00000024743/ENSMUSG00000031144/ENSMUSG00000040722/ENSMUSG00000027438/ENSMUSG00000051790/ENSMUSG00000026452/ENSMUSG00000033419/ENSMUSG00000034891/ENSMUSG00000021314/ENSMUSG00000028488/ENSMUSG00000040276/ENSMUSG00000034902/ENSMUSG00000022841/ENSMUSG00000040265/ENSMUSG00000028528	17
316	Down	GO:0140238	presynaptic endocytosis	17/1598	62/21087	2.2802E-06	5.6868E-05	4.86119E-05	ENSMUSG00000026825/ENSMUSG00000021816/ENSMUSG00000024743/ENSMUSG00000031144/ENSMUSG00000040722/ENSMUSG00000027438/ENSMUSG00000051790/ENSMUSG00000026452/ENSMUSG00000033419/ENSMUSG00000034891/ENSMUSG00000021314/ENSMUSG00000028488/ENSMUSG00000040276/ENSMUSG00000034902/ENSMUSG00000022841/ENSMUSG00000040265/ENSMUSG00000028528	17
317	Down	GO:0072659	protein localization to plasma membrane	45/1598	286/21087	2.29193E-06	5.69801E-05	4.87077E-05	ENSMUSG00000026797/ENSMUSG00000057897/ENSMUSG00000031840/ENSMUSG00000035863/ENSMUSG00000021567/ENSMUSG00000045377/ENSMUSG00000024127/ENSMUSG00000024065/ENSMUSG00000030098/ENSMUSG00000096146/ENSMUSG00000034187/ENSMUSG00000001507/ENSMUSG00000029126/ENSMUSG00000030805/ENSMUSG00000021466/ENSMUSG00000033389/ENSMUSG00000050556/ENSMUSG00000038976/ENSMUSG00000029053/ENSMUSG00000020894/ENSMUSG00000003411/…	45
318	Down	GO:0090066	regulation of anatomical structure size	74/1598	564/21087	2.46605E-06	6.10017E-05	5.21455E-05	ENSMUSG00000042429/ENSMUSG00000034997/ENSMUSG00000048895/ENSMUSG00000059146/ENSMUSG00000022812/ENSMUSG00000038264/ENSMUSG00000022623/ENSMUSG00000019699/ENSMUSG00000037010/ENSMUSG00000028991/ENSMUSG00000033618/ENSMUSG00000038807/ENSMUSG00000030669/ENSMUSG00000024858/ENSMUSG00000074238/ENSMUSG00000051149/ENSMUSG00000030098/ENSMUSG00000030110/ENSMUSG00000050357/ENSMUSG00000045038/ENSMUSG00000027805/…	74
319	Down	GO:0051494	negative regulation of cytoskeleton organization	30/1598	158/21087	2.46917E-06	6.10017E-05	5.21455E-05	ENSMUSG00000020135/ENSMUSG00000022623/ENSMUSG00000026697/ENSMUSG00000027254/ENSMUSG00000050357/ENSMUSG00000027805/ENSMUSG00000090100/ENSMUSG00000022099/ENSMUSG00000032827/ENSMUSG00000038738/ENSMUSG00000030000/ENSMUSG00000041729/ENSMUSG00000033788/ENSMUSG00000062591/ENSMUSG00000030357/ENSMUSG00000034295/ENSMUSG00000034570/ENSMUSG00000064302/ENSMUSG00000015222/ENSMUSG00000021061/ENSMUSG00000040811/…	30
320	Down	GO:0031345	negative regulation of cell projection organization	36/1598	208/21087	2.53251E-06	6.23709E-05	5.33159E-05	ENSMUSG00000048895/ENSMUSG00000030209/ENSMUSG00000022812/ENSMUSG00000038264/ENSMUSG00000033862/ENSMUSG00000038807/ENSMUSG00000032011/ENSMUSG00000055725/ENSMUSG00000028161/ENSMUSG00000000632/ENSMUSG00000001507/ENSMUSG00000027805/ENSMUSG00000057531/ENSMUSG00000057177/ENSMUSG00000041351/ENSMUSG00000029512/ENSMUSG00000042105/ENSMUSG00000039313/ENSMUSG00000028519/ENSMUSG00000057455/ENSMUSG00000024501/…	36
321	Down	GO:0002090	regulation of receptor internalization	18/1598	70/21087	3.18641E-06	7.82308E-05	6.68733E-05	ENSMUSG00000050148/ENSMUSG00000060780/ENSMUSG00000020886/ENSMUSG00000037010/ENSMUSG00000031837/ENSMUSG00000027438/ENSMUSG00000034187/ENSMUSG00000030854/ENSMUSG00000057531/ENSMUSG00000006930/ENSMUSG00000022602/ENSMUSG00000023951/ENSMUSG00000028785/ENSMUSG00000037907/ENSMUSG00000028488/ENSMUSG00000040276/ENSMUSG00000034902/ENSMUSG00000022841	18
322	Down	GO:0043624	cellular protein complex disassembly	27/1598	136/21087	3.2177E-06	7.87536E-05	6.73202E-05	ENSMUSG00000020135/ENSMUSG00000027254/ENSMUSG00000050357/ENSMUSG00000027438/ENSMUSG00000034187/ENSMUSG00000027581/ENSMUSG00000090100/ENSMUSG00000022099/ENSMUSG00000006024/ENSMUSG00000062991/ENSMUSG00000028975/ENSMUSG00000030000/ENSMUSG00000033788/ENSMUSG00000052374/ENSMUSG00000064302/ENSMUSG00000015222/ENSMUSG00000021061/ENSMUSG00000028488/ENSMUSG00000044117/ENSMUSG00000038244/ENSMUSG00000044433/…	27
323	Down	GO:0016126	sterol biosynthetic process	15/1598	51/21087	3.42466E-06	8.33016E-05	7.12079E-05	ENSMUSG00000036585/ENSMUSG00000045294/ENSMUSG00000022351/ENSMUSG00000059743/ENSMUSG00000034926/ENSMUSG00000027952/ENSMUSG00000006517/ENSMUSG00000041939/ENSMUSG00000093930/ENSMUSG00000001467/ENSMUSG00000021252/ENSMUSG00000032018/ENSMUSG00000031604/ENSMUSG00000024799/ENSMUSG00000058454	15
324	Down	GO:0051954	positive regulation of amine transport	15/1598	51/21087	3.42466E-06	8.33016E-05	7.12079E-05	ENSMUSG00000026797/ENSMUSG00000030209/ENSMUSG00000027577/ENSMUSG00000090223/ENSMUSG00000028756/ENSMUSG00000024858/ENSMUSG00000030310/ENSMUSG00000021647/ENSMUSG00000048142/ENSMUSG00000057531/ENSMUSG00000050556/ENSMUSG00000024462/ENSMUSG00000057880/ENSMUSG00000003411/ENSMUSG00000032532	15
325	Down	GO:0006886	intracellular protein transport	133/1598	1192/21087	3.44744E-06	8.35978E-05	7.14612E-05	ENSMUSG00000042429/ENSMUSG00000048895/ENSMUSG00000019146/ENSMUSG00000042249/ENSMUSG00000041670/ENSMUSG00000006435/ENSMUSG00000031840/ENSMUSG00000005469/ENSMUSG00000022812/ENSMUSG00000025499/ENSMUSG00000020657/ENSMUSG00000021974/ENSMUSG00000033862/ENSMUSG00000028756/ENSMUSG00000051391/ENSMUSG00000024065/ENSMUSG00000029608/ENSMUSG00000030098/ENSMUSG00000027254/ENSMUSG00000025793/ENSMUSG00000027438/…	133
326	Down	GO:0031109	microtubule polymerization or depolymerization	25/1598	121/21087	3.48138E-06	8.41619E-05	7.19433E-05	ENSMUSG00000024277/ENSMUSG00000020135/ENSMUSG00000027254/ENSMUSG00000027581/ENSMUSG00000090100/ENSMUSG00000033788/ENSMUSG00000026131/ENSMUSG00000062591/ENSMUSG00000030357/ENSMUSG00000031865/ENSMUSG00000034570/ENSMUSG00000018736/ENSMUSG00000064302/ENSMUSG00000015222/ENSMUSG00000035198/ENSMUSG00000051786/ENSMUSG00000040811/ENSMUSG00000044117/ENSMUSG00000044433/ENSMUSG00000027500/ENSMUSG00000013921/…	25
327	Down	GO:0006107	oxaloacetate metabolic process	7/1598	11/21087	3.56188E-06	8.55828E-05	7.3158E-05	ENSMUSG00000025190/ENSMUSG00000005683/ENSMUSG00000020917/ENSMUSG00000031672/ENSMUSG00000019179/ENSMUSG00000020321/ENSMUSG00000024892	7
328	Down	GO:1902513	regulation of organelle transport along microtubule	7/1598	11/21087	3.56188E-06	8.55828E-05	7.3158E-05	ENSMUSG00000024873/ENSMUSG00000006930/ENSMUSG00000020396/ENSMUSG00000015222/ENSMUSG00000032118/ENSMUSG00000042766/ENSMUSG00000042992	7
329	Down	GO:0048814	regulation of dendrite morphogenesis	24/1598	114/21087	3.8439E-06	9.20782E-05	7.87104E-05	ENSMUSG00000050132/ENSMUSG00000048895/ENSMUSG00000057897/ENSMUSG00000022812/ENSMUSG00000022623/ENSMUSG00000023328/ENSMUSG00000042700/ENSMUSG00000006476/ENSMUSG00000042589/ENSMUSG00000028161/ENSMUSG00000057531/ENSMUSG00000033389/ENSMUSG00000022883/ENSMUSG00000025920/ENSMUSG00000026959/ENSMUSG00000032827/ENSMUSG00000022602/ENSMUSG00000032867/ENSMUSG00000029516/ENSMUSG00000052934/ENSMUSG00000040265/…	24
330	Down	GO:0099068	postsynapse assembly	12/1598	34/21087	3.91299E-06	9.34493E-05	7.98824E-05	ENSMUSG00000060780/ENSMUSG00000059146/ENSMUSG00000022623/ENSMUSG00000042700/ENSMUSG00000031654/ENSMUSG00000025582/ENSMUSG00000051790/ENSMUSG00000025656/ENSMUSG00000038738/ENSMUSG00000030600/ENSMUSG00000047085/ENSMUSG00000033768	12
331	Down	GO:0048791	calcium ion-regulated exocytosis of neurotransmitter	10/1598	24/21087	4.43773E-06	0.000105661	9.03211E-05	ENSMUSG00000026797/ENSMUSG00000041670/ENSMUSG00000024743/ENSMUSG00000032890/ENSMUSG00000027273/ENSMUSG00000030806/ENSMUSG00000026452/ENSMUSG00000034656/ENSMUSG00000035226/ENSMUSG00000054423	10
332	Down	GO:0098876	vesicle-mediated transport to the plasma membrane	22/1598	100/21087	4.51607E-06	0.000107202	9.16388E-05	ENSMUSG00000039953/ENSMUSG00000024127/ENSMUSG00000030098/ENSMUSG00000033615/ENSMUSG00000009894/ENSMUSG00000034187/ENSMUSG00000027273/ENSMUSG00000029126/ENSMUSG00000030805/ENSMUSG00000033389/ENSMUSG00000030806/ENSMUSG00000020894/ENSMUSG00000069601/ENSMUSG00000033769/ENSMUSG00000032883/ENSMUSG00000025035/ENSMUSG00000031153/ENSMUSG00000028136/ENSMUSG00000034813/ENSMUSG00000046709/ENSMUSG00000038949/…	22
333	Down	GO:0070838	divalent metal ion transport	64/1598	474/21087	4.5644E-06	0.000108024	9.23413E-05	ENSMUSG00000027584/ENSMUSG00000031748/ENSMUSG00000034997/ENSMUSG00000030209/ENSMUSG00000019146/ENSMUSG00000057897/ENSMUSG00000020734/ENSMUSG00000019997/ENSMUSG00000023017/ENSMUSG00000027577/ENSMUSG00000021313/ENSMUSG00000018634/ENSMUSG00000032011/ENSMUSG00000024065/ENSMUSG00000061603/ENSMUSG00000025813/ENSMUSG00000028161/ENSMUSG00000045038/ENSMUSG00000020635/ENSMUSG00000025318/ENSMUSG00000079055/…	64
334	Down	GO:0098967	exocytic insertion of neurotransmitter receptor to postsynaptic membrane	6/1598	8/21087	4.59911E-06	0.00010852	9.27649E-05	ENSMUSG00000033615/ENSMUSG00000009894/ENSMUSG00000027273/ENSMUSG00000030805/ENSMUSG00000030806/ENSMUSG00000020894	6
335	Down	GO:0055080	cation homeostasis	90/1598	738/21087	4.66604E-06	0.00010977	9.38339E-05	ENSMUSG00000032336/ENSMUSG00000042429/ENSMUSG00000033208/ENSMUSG00000027584/ENSMUSG00000034997/ENSMUSG00000030209/ENSMUSG00000003657/ENSMUSG00000020734/ENSMUSG00000020886/ENSMUSG00000039953/ENSMUSG00000022840/ENSMUSG00000021313/ENSMUSG00000030666/ENSMUSG00000078566/ENSMUSG00000018634/ENSMUSG00000019828/ENSMUSG00000030669/ENSMUSG00000032011/ENSMUSG00000031883/ENSMUSG00000038967/ENSMUSG00000061603/…	90
336	Down	GO:0023052	signaling	576/1598	6549/21087	5.33913E-06	0.000124961	0.000106819	ENSMUSG00000066392/ENSMUSG00000017737/ENSMUSG00000020099/ENSMUSG00000032336/ENSMUSG00000020891/ENSMUSG00000036585/ENSMUSG00000024277/ENSMUSG00000042429/ENSMUSG00000047507/ENSMUSG00000024524/ENSMUSG00000033208/ENSMUSG00000021684/ENSMUSG00000027895/ENSMUSG00000024186/ENSMUSG00000050148/ENSMUSG00000021708/ENSMUSG00000025407/ENSMUSG00000023064/ENSMUSG00000035953/ENSMUSG00000027223/ENSMUSG00000072214/…	576
337	Down	GO:0055086	nucleobase-containing small molecule metabolic process	73/1598	566/21087	5.34348E-06	0.000124961	0.000106819	ENSMUSG00000034997/ENSMUSG00000037012/ENSMUSG00000029167/ENSMUSG00000022840/ENSMUSG00000028991/ENSMUSG00000005580/ENSMUSG00000028756/ENSMUSG00000038967/ENSMUSG00000049422/ENSMUSG00000029361/ENSMUSG00000020431/ENSMUSG00000030302/ENSMUSG00000035011/ENSMUSG00000059734/ENSMUSG00000028785/ENSMUSG00000003072/ENSMUSG00000032294/ENSMUSG00000028982/ENSMUSG00000038028/ENSMUSG00000006057/ENSMUSG00000021255/…	73
338	Down	GO:1901214	regulation of neuron death	53/1598	370/21087	5.44351E-06	0.000126924	0.000108497	ENSMUSG00000020099/ENSMUSG00000042429/ENSMUSG00000023064/ENSMUSG00000050132/ENSMUSG00000048895/ENSMUSG00000026797/ENSMUSG00000030209/ENSMUSG00000029167/ENSMUSG00000032537/ENSMUSG00000022812/ENSMUSG00000025499/ENSMUSG00000018634/ENSMUSG00000028991/ENSMUSG00000024962/ENSMUSG00000006476/ENSMUSG00000090223/ENSMUSG00000028756/ENSMUSG00000051149/ENSMUSG00000049551/ENSMUSG00000030854/ENSMUSG00000021194/…	53
339	Down	GO:0032411	positive regulation of transporter activity	25/1598	124/21087	5.51791E-06	0.000128279	0.000109656	ENSMUSG00000019146/ENSMUSG00000021313/ENSMUSG00000022623/ENSMUSG00000028756/ENSMUSG00000024065/ENSMUSG00000061603/ENSMUSG00000096146/ENSMUSG00000049422/ENSMUSG00000040136/ENSMUSG00000006930/ENSMUSG00000004035/ENSMUSG00000028854/ENSMUSG00000027030/ENSMUSG00000022602/ENSMUSG00000037989/ENSMUSG00000007021/ENSMUSG00000069601/ENSMUSG00000052374/ENSMUSG00000031633/ENSMUSG00000047976/ENSMUSG00000050947/…	25
340	Down	GO:0072511	divalent inorganic cation transport	64/1598	477/21087	5.62204E-06	0.000130316	0.000111397	ENSMUSG00000027584/ENSMUSG00000031748/ENSMUSG00000034997/ENSMUSG00000030209/ENSMUSG00000019146/ENSMUSG00000057897/ENSMUSG00000020734/ENSMUSG00000019997/ENSMUSG00000023017/ENSMUSG00000027577/ENSMUSG00000021313/ENSMUSG00000018634/ENSMUSG00000032011/ENSMUSG00000024065/ENSMUSG00000061603/ENSMUSG00000025813/ENSMUSG00000028161/ENSMUSG00000045038/ENSMUSG00000020635/ENSMUSG00000025318/ENSMUSG00000079055/…	64
341	Down	GO:0032535	regulation of cellular component size	56/1598	400/21087	6.02726E-06	0.000139236	0.000119022	ENSMUSG00000048895/ENSMUSG00000059146/ENSMUSG00000022812/ENSMUSG00000038264/ENSMUSG00000022623/ENSMUSG00000019699/ENSMUSG00000028991/ENSMUSG00000033618/ENSMUSG00000038807/ENSMUSG00000074238/ENSMUSG00000051149/ENSMUSG00000030110/ENSMUSG00000050357/ENSMUSG00000045038/ENSMUSG00000027805/ENSMUSG00000029512/ENSMUSG00000022099/ENSMUSG00000058230/ENSMUSG00000032827/ENSMUSG00000062991/ENSMUSG00000003411/…	56
342	Down	GO:1905475	regulation of protein localization to membrane	33/1598	190/21087	6.04224E-06	0.000139236	0.000119022	ENSMUSG00000048895/ENSMUSG00000019146/ENSMUSG00000057897/ENSMUSG00000022812/ENSMUSG00000025499/ENSMUSG00000021567/ENSMUSG00000022623/ENSMUSG00000030098/ENSMUSG00000096146/ENSMUSG00000031837/ENSMUSG00000049551/ENSMUSG00000001507/ENSMUSG00000051790/ENSMUSG00000030805/ENSMUSG00000022112/ENSMUSG00000033389/ENSMUSG00000050556/ENSMUSG00000038976/ENSMUSG00000041115/ENSMUSG00000029053/ENSMUSG00000022099/…	33
343	Down	GO:0030100	regulation of endocytosis	36/1598	216/21087	6.16779E-06	0.000141715	0.000121141	ENSMUSG00000050148/ENSMUSG00000026825/ENSMUSG00000021816/ENSMUSG00000060780/ENSMUSG00000020886/ENSMUSG00000024743/ENSMUSG00000037010/ENSMUSG00000031837/ENSMUSG00000040722/ENSMUSG00000027438/ENSMUSG00000028161/ENSMUSG00000034187/ENSMUSG00000030854/ENSMUSG00000057531/ENSMUSG00000006930/ENSMUSG00000022602/ENSMUSG00000023951/ENSMUSG00000057455/ENSMUSG00000027257/ENSMUSG00000022791/ENSMUSG00000028785/…	36
344	Down	GO:0048268	clathrin coat assembly	9/1598	20/21087	6.27776E-06	0.000142579	0.00012188	ENSMUSG00000029126/ENSMUSG00000070000/ENSMUSG00000033419/ENSMUSG00000035203/ENSMUSG00000009090/ENSMUSG00000047547/ENSMUSG00000025468/ENSMUSG00000028524/ENSMUSG00000020297	9
345	Down	GO:0048490	anterograde synaptic vesicle transport	9/1598	20/21087	6.27776E-06	0.000142579	0.00012188	ENSMUSG00000024873/ENSMUSG00000057531/ENSMUSG00000040687/ENSMUSG00000020198/ENSMUSG00000015222/ENSMUSG00000042766/ENSMUSG00000063801/ENSMUSG00000042992/ENSMUSG00000062444	9
346	Down	GO:0099514	synaptic vesicle cytoskeletal transport	9/1598	20/21087	6.27776E-06	0.000142579	0.00012188	ENSMUSG00000024873/ENSMUSG00000057531/ENSMUSG00000040687/ENSMUSG00000020198/ENSMUSG00000015222/ENSMUSG00000042766/ENSMUSG00000063801/ENSMUSG00000042992/ENSMUSG00000062444	9
347	Down	GO:0099517	synaptic vesicle transport along microtubule	9/1598	20/21087	6.27776E-06	0.000142579	0.00012188	ENSMUSG00000024873/ENSMUSG00000057531/ENSMUSG00000040687/ENSMUSG00000020198/ENSMUSG00000015222/ENSMUSG00000042766/ENSMUSG00000063801/ENSMUSG00000042992/ENSMUSG00000062444	9
348	Down	GO:0021549	cerebellum development	22/1598	102/21087	6.35662E-06	0.000143543	0.000122704	ENSMUSG00000025407/ENSMUSG00000048895/ENSMUSG00000031654/ENSMUSG00000000632/ENSMUSG00000058153/ENSMUSG00000029512/ENSMUSG00000006930/ENSMUSG00000090100/ENSMUSG00000023011/ENSMUSG00000024039/ENSMUSG00000030683/ENSMUSG00000028519/ENSMUSG00000030302/ENSMUSG00000034656/ENSMUSG00000039137/ENSMUSG00000090071/ENSMUSG00000067889/ENSMUSG00000020900/ENSMUSG00000066129/ENSMUSG00000060240/ENSMUSG00000028541/…	22
349	Down	GO:0106027	neuron projection organization	22/1598	102/21087	6.35662E-06	0.000143543	0.000122704	ENSMUSG00000048895/ENSMUSG00000030209/ENSMUSG00000057897/ENSMUSG00000032537/ENSMUSG00000020886/ENSMUSG00000022812/ENSMUSG00000022623/ENSMUSG00000042700/ENSMUSG00000029608/ENSMUSG00000027254/ENSMUSG00000042589/ENSMUSG00000001507/ENSMUSG00000057531/ENSMUSG00000033389/ENSMUSG00000025920/ENSMUSG00000026959/ENSMUSG00000032827/ENSMUSG00000022602/ENSMUSG00000038738/ENSMUSG00000031865/ENSMUSG00000040265/…	22
350	Down	GO:0048523	negative regulation of cellular process	439/1598	4843/21087	7.02675E-06	0.000158222	0.000135252	ENSMUSG00000017737/ENSMUSG00000020099/ENSMUSG00000020891/ENSMUSG00000042429/ENSMUSG00000033208/ENSMUSG00000021684/ENSMUSG00000027895/ENSMUSG00000024186/ENSMUSG00000050148/ENSMUSG00000025407/ENSMUSG00000023064/ENSMUSG00000027223/ENSMUSG00000027584/ENSMUSG00000022619/ENSMUSG00000017897/ENSMUSG00000050132/ENSMUSG00000034997/ENSMUSG00000048895/ENSMUSG00000026797/ENSMUSG00000037012/ENSMUSG00000019428/…	439
351	Down	GO:0055082	cellular chemical homeostasis	97/1598	820/21087	7.31327E-06	0.000164205	0.000140366	ENSMUSG00000032336/ENSMUSG00000047507/ENSMUSG00000033208/ENSMUSG00000021684/ENSMUSG00000027584/ENSMUSG00000034997/ENSMUSG00000037012/ENSMUSG00000030209/ENSMUSG00000003657/ENSMUSG00000020734/ENSMUSG00000021816/ENSMUSG00000005469/ENSMUSG00000020886/ENSMUSG00000039953/ENSMUSG00000022840/ENSMUSG00000021313/ENSMUSG00000030666/ENSMUSG00000078566/ENSMUSG00000018634/ENSMUSG00000053046/ENSMUSG00000051343/…	97
352	Down	GO:0072583	clathrin-dependent endocytosis	12/1598	36/21087	7.74567E-06	0.000173419	0.000148243	ENSMUSG00000050148/ENSMUSG00000026825/ENSMUSG00000042105/ENSMUSG00000022791/ENSMUSG00000070000/ENSMUSG00000033419/ENSMUSG00000060279/ENSMUSG00000028488/ENSMUSG00000022841/ENSMUSG00000047547/ENSMUSG00000028528/ENSMUSG00000028524	12
353	Down	GO:0031503	protein-containing complex localization	68/1598	522/21087	7.96688E-06	0.000177867	0.000152044	ENSMUSG00000032336/ENSMUSG00000019146/ENSMUSG00000026825/ENSMUSG00000006435/ENSMUSG00000020886/ENSMUSG00000039953/ENSMUSG00000022812/ENSMUSG00000025499/ENSMUSG00000011877/ENSMUSG00000033862/ENSMUSG00000025582/ENSMUSG00000024065/ENSMUSG00000030098/ENSMUSG00000061603/ENSMUSG00000033615/ENSMUSG00000059991/ENSMUSG00000009894/ENSMUSG00000024873/ENSMUSG00000027273/ENSMUSG00000029126/ENSMUSG00000030805/…	68
354	Down	GO:0016197	endosomal transport	35/1598	210/21087	8.25139E-06	0.000183698	0.000157029	ENSMUSG00000047507/ENSMUSG00000034557/ENSMUSG00000020802/ENSMUSG00000024127/ENSMUSG00000024065/ENSMUSG00000030098/ENSMUSG00000027273/ENSMUSG00000037098/ENSMUSG00000029126/ENSMUSG00000033389/ENSMUSG00000042105/ENSMUSG00000036564/ENSMUSG00000068747/ENSMUSG00000052374/ENSMUSG00000038039/ENSMUSG00000031865/ENSMUSG00000020198/ENSMUSG00000006058/ENSMUSG00000004567/ENSMUSG00000025224/ENSMUSG00000031153/…	35
355	Down	GO:0060048	cardiac muscle contraction	25/1598	127/21087	8.58925E-06	0.000190681	0.000162998	ENSMUSG00000042429/ENSMUSG00000019997/ENSMUSG00000021313/ENSMUSG00000028991/ENSMUSG00000024962/ENSMUSG00000024858/ENSMUSG00000024065/ENSMUSG00000061603/ENSMUSG00000021194/ENSMUSG00000020635/ENSMUSG00000028854/ENSMUSG00000050541/ENSMUSG00000025579/ENSMUSG00000019194/ENSMUSG00000051331/ENSMUSG00000038319/ENSMUSG00000020866/ENSMUSG00000040907/ENSMUSG00000032338/ENSMUSG00000070304/ENSMUSG00000026576/…	25
356	Down	GO:0021700	developmental maturation	47/1598	320/21087	9.33192E-06	0.000206471	0.000176496	ENSMUSG00000047507/ENSMUSG00000048895/ENSMUSG00000026797/ENSMUSG00000057897/ENSMUSG00000006435/ENSMUSG00000031840/ENSMUSG00000005469/ENSMUSG00000035863/ENSMUSG00000020886/ENSMUSG00000039953/ENSMUSG00000022812/ENSMUSG00000028991/ENSMUSG00000033618/ENSMUSG00000026697/ENSMUSG00000030669/ENSMUSG00000030098/ENSMUSG00000030110/ENSMUSG00000000632/ENSMUSG00000013033/ENSMUSG00000058153/ENSMUSG00000048001/…	47
357	Down	GO:1903421	regulation of synaptic vesicle recycling	11/1598	31/21087	9.35291E-06	0.000206471	0.000176496	ENSMUSG00000026825/ENSMUSG00000021816/ENSMUSG00000024743/ENSMUSG00000040722/ENSMUSG00000030806/ENSMUSG00000020894/ENSMUSG00000033419/ENSMUSG00000031153/ENSMUSG00000034902/ENSMUSG00000022841/ENSMUSG00000040265	11
358	Down	GO:0045773	positive regulation of axon extension	15/1598	55/21087	9.5756E-06	0.000210797	0.000180194	ENSMUSG00000059146/ENSMUSG00000022812/ENSMUSG00000038264/ENSMUSG00000033618/ENSMUSG00000051149/ENSMUSG00000062991/ENSMUSG00000023951/ENSMUSG00000029674/ENSMUSG00000029291/ENSMUSG00000006057/ENSMUSG00000018736/ENSMUSG00000015291/ENSMUSG00000000305/ENSMUSG00000052727/ENSMUSG00000050272	15
359	Down	GO:0070507	regulation of microtubule cytoskeleton organization	34/1598	203/21087	9.90939E-06	0.000217537	0.000185955	ENSMUSG00000024277/ENSMUSG00000048895/ENSMUSG00000022812/ENSMUSG00000020135/ENSMUSG00000027254/ENSMUSG00000027581/ENSMUSG00000057177/ENSMUSG00000090100/ENSMUSG00000030397/ENSMUSG00000033788/ENSMUSG00000026131/ENSMUSG00000015095/ENSMUSG00000062591/ENSMUSG00000030357/ENSMUSG00000031865/ENSMUSG00000038241/ENSMUSG00000033900/ENSMUSG00000034570/ENSMUSG00000064302/ENSMUSG00000015222/ENSMUSG00000024969/…	34
360	Down	GO:0010770	positive regulation of cell morphogenesis involved in differentiation	32/1598	186/21087	1.01679E-05	0.000222079	0.000189838	ENSMUSG00000057897/ENSMUSG00000020366/ENSMUSG00000059146/ENSMUSG00000022812/ENSMUSG00000038264/ENSMUSG00000023328/ENSMUSG00000033618/ENSMUSG00000026697/ENSMUSG00000051149/ENSMUSG00000042589/ENSMUSG00000022883/ENSMUSG00000022099/ENSMUSG00000025920/ENSMUSG00000062991/ENSMUSG00000023951/ENSMUSG00000029674/ENSMUSG00000032867/ENSMUSG00000052934/ENSMUSG00000029291/ENSMUSG00000006057/ENSMUSG00000033419/…	32
361	Down	GO:0051051	negative regulation of transport	70/1598	546/21087	1.01726E-05	0.000222079	0.000189838	ENSMUSG00000017737/ENSMUSG00000042429/ENSMUSG00000021684/ENSMUSG00000050148/ENSMUSG00000027584/ENSMUSG00000031748/ENSMUSG00000034997/ENSMUSG00000060780/ENSMUSG00000023017/ENSMUSG00000020886/ENSMUSG00000018634/ENSMUSG00000028991/ENSMUSG00000029073/ENSMUSG00000051343/ENSMUSG00000024858/ENSMUSG00000054459/ENSMUSG00000028445/ENSMUSG00000096146/ENSMUSG00000031837/ENSMUSG00000040722/ENSMUSG00000026179/…	70
362	Down	GO:0006816	calcium ion transport	58/1598	427/21087	1.05122E-05	0.000228859	0.000195633	ENSMUSG00000027584/ENSMUSG00000031748/ENSMUSG00000034997/ENSMUSG00000030209/ENSMUSG00000019146/ENSMUSG00000057897/ENSMUSG00000020734/ENSMUSG00000019997/ENSMUSG00000023017/ENSMUSG00000027577/ENSMUSG00000021313/ENSMUSG00000018634/ENSMUSG00000032011/ENSMUSG00000024065/ENSMUSG00000061603/ENSMUSG00000025813/ENSMUSG00000028161/ENSMUSG00000045038/ENSMUSG00000020635/ENSMUSG00000025318/ENSMUSG00000079055/…	58
363	Down	GO:2000463	positive regulation of excitatory postsynaptic potential	12/1598	37/21087	1.06759E-05	0.000231782	0.000198132	ENSMUSG00000041670/ENSMUSG00000020886/ENSMUSG00000022812/ENSMUSG00000022623/ENSMUSG00000024858/ENSMUSG00000030098/ENSMUSG00000042589/ENSMUSG00000051790/ENSMUSG00000030806/ENSMUSG00000029053/ENSMUSG00000026959/ENSMUSG00000038738	12
364	Down	GO:0001764	neuron migration	32/1598	187/21087	1.13907E-05	0.00024662	0.000210816	ENSMUSG00000048895/ENSMUSG00000057897/ENSMUSG00000059146/ENSMUSG00000022812/ENSMUSG00000029673/ENSMUSG00000006476/ENSMUSG00000001507/ENSMUSG00000024163/ENSMUSG00000028519/ENSMUSG00000062991/ENSMUSG00000023951/ENSMUSG00000023473/ENSMUSG00000052934/ENSMUSG00000090071/ENSMUSG00000054728/ENSMUSG00000018736/ENSMUSG00000026620/ENSMUSG00000032532/ENSMUSG00000024969/ENSMUSG00000056222/ENSMUSG00000026833/…	32
365	Down	GO:1905114	cell surface receptor signaling pathway involved in cell-cell signaling	69/1598	538/21087	1.15992E-05	0.000250447	0.000214087	ENSMUSG00000042429/ENSMUSG00000025407/ENSMUSG00000022619/ENSMUSG00000030209/ENSMUSG00000020734/ENSMUSG00000041670/ENSMUSG00000027577/ENSMUSG00000020886/ENSMUSG00000017314/ENSMUSG00000022812/ENSMUSG00000021313/ENSMUSG00000020135/ENSMUSG00000022855/ENSMUSG00000021567/ENSMUSG00000022623/ENSMUSG00000078202/ENSMUSG00000008734/ENSMUSG00000045377/ENSMUSG00000048826/ENSMUSG00000029559/ENSMUSG00000021974/…	69
366	Down	GO:0022037	metencephalon development	23/1598	114/21087	1.27526E-05	0.000274599	0.000234733	ENSMUSG00000025407/ENSMUSG00000048895/ENSMUSG00000031654/ENSMUSG00000000632/ENSMUSG00000058153/ENSMUSG00000029512/ENSMUSG00000006930/ENSMUSG00000090100/ENSMUSG00000023011/ENSMUSG00000024039/ENSMUSG00000026959/ENSMUSG00000030683/ENSMUSG00000028519/ENSMUSG00000030302/ENSMUSG00000034656/ENSMUSG00000039137/ENSMUSG00000090071/ENSMUSG00000067889/ENSMUSG00000020900/ENSMUSG00000066129/ENSMUSG00000060240/…	23
367	Down	GO:0021680	cerebellar Purkinje cell layer development	11/1598	32/21087	1.32787E-05	0.000285148	0.00024375	ENSMUSG00000000632/ENSMUSG00000058153/ENSMUSG00000023011/ENSMUSG00000030683/ENSMUSG00000030302/ENSMUSG00000034656/ENSMUSG00000039137/ENSMUSG00000067889/ENSMUSG00000020900/ENSMUSG00000060240/ENSMUSG00000028541	11
368	Down	GO:0071625	vocalization behavior	8/1598	17/21087	1.39622E-05	0.0002982	0.000254908	ENSMUSG00000020886/ENSMUSG00000022623/ENSMUSG00000029673/ENSMUSG00000038738/ENSMUSG00000039419/ENSMUSG00000033768/ENSMUSG00000028351/ENSMUSG00000030739	8
369	Down	GO:0086012	membrane depolarization during cardiac muscle cell action potential	8/1598	17/21087	1.39622E-05	0.0002982	0.000254908	ENSMUSG00000069601/ENSMUSG00000019194/ENSMUSG00000051331/ENSMUSG00000020866/ENSMUSG00000032338/ENSMUSG00000070304/ENSMUSG00000046480/ENSMUSG00000049281	8
370	Down	GO:0043266	regulation of potassium ion transport	22/1598	107/21087	1.42781E-05	0.000304029	0.000259891	ENSMUSG00000042429/ENSMUSG00000034997/ENSMUSG00000061603/ENSMUSG00000040136/ENSMUSG00000027030/ENSMUSG00000029361/ENSMUSG00000020894/ENSMUSG00000037989/ENSMUSG00000069601/ENSMUSG00000052374/ENSMUSG00000028931/ENSMUSG00000047976/ENSMUSG00000038319/ENSMUSG00000028136/ENSMUSG00000050947/ENSMUSG00000058975/ENSMUSG00000074575/ENSMUSG00000079056/ENSMUSG00000061576/ENSMUSG00000026576/ENSMUSG00000053519/…	22
371	Down	GO:0019725	cellular homeostasis	107/1598	941/21087	1.43123E-05	0.000304029	0.000259891	ENSMUSG00000032336/ENSMUSG00000047507/ENSMUSG00000033208/ENSMUSG00000021684/ENSMUSG00000027584/ENSMUSG00000034997/ENSMUSG00000037012/ENSMUSG00000030209/ENSMUSG00000003657/ENSMUSG00000020734/ENSMUSG00000021816/ENSMUSG00000005469/ENSMUSG00000020886/ENSMUSG00000039953/ENSMUSG00000022840/ENSMUSG00000021313/ENSMUSG00000030666/ENSMUSG00000022623/ENSMUSG00000078566/ENSMUSG00000018634/ENSMUSG00000053046/…	107
372	Down	GO:1901137	carbohydrate derivative biosynthetic process	77/1598	624/21087	1.48891E-05	0.000315432	0.000269638	ENSMUSG00000029167/ENSMUSG00000022840/ENSMUSG00000005580/ENSMUSG00000024962/ENSMUSG00000028756/ENSMUSG00000038967/ENSMUSG00000031837/ENSMUSG00000049422/ENSMUSG00000029361/ENSMUSG00000020431/ENSMUSG00000056124/ENSMUSG00000059734/ENSMUSG00000033579/ENSMUSG00000028785/ENSMUSG00000003072/ENSMUSG00000032294/ENSMUSG00000028982/ENSMUSG00000006057/ENSMUSG00000024151/ENSMUSG00000060279/ENSMUSG00000025630/…	77
373	Down	GO:0045921	positive regulation of exocytosis	21/1598	100/21087	1.58158E-05	0.000334168	0.000285654	ENSMUSG00000072214/ENSMUSG00000026797/ENSMUSG00000041670/ENSMUSG00000031840/ENSMUSG00000024743/ENSMUSG00000018634/ENSMUSG00000054459/ENSMUSG00000025793/ENSMUSG00000040722/ENSMUSG00000030805/ENSMUSG00000050556/ENSMUSG00000045114/ENSMUSG00000026452/ENSMUSG00000062661/ENSMUSG00000090071/ENSMUSG00000006058/ENSMUSG00000064302/ENSMUSG00000036622/ENSMUSG00000020866/ENSMUSG00000022416/ENSMUSG00000054423	21
374	Down	GO:0051654	establishment of mitochondrion localization	9/1598	22/21087	1.61745E-05	0.000340832	0.00029135	ENSMUSG00000029223/ENSMUSG00000006930/ENSMUSG00000026620/ENSMUSG00000025733/ENSMUSG00000032118/ENSMUSG00000052727/ENSMUSG00000055407/ENSMUSG00000022055/ENSMUSG00000063077	9
375	Down	GO:0035725	sodium ion transmembrane transport	22/1598	108/21087	1.66637E-05	0.000350205	0.000299362	ENSMUSG00000023017/ENSMUSG00000079055/ENSMUSG00000028854/ENSMUSG00000027030/ENSMUSG00000029361/ENSMUSG00000037989/ENSMUSG00000037578/ENSMUSG00000069601/ENSMUSG00000019194/ENSMUSG00000040907/ENSMUSG00000029359/ENSMUSG00000036578/ENSMUSG00000032338/ENSMUSG00000014786/ENSMUSG00000070304/ENSMUSG00000026576/ENSMUSG00000033998/ENSMUSG00000020331/ENSMUSG00000064329/ENSMUSG00000023033/ENSMUSG00000046480/…	22
376	Down	GO:0098771	inorganic ion homeostasis	89/1598	752/21087	1.70374E-05	0.000357106	0.000305261	ENSMUSG00000032336/ENSMUSG00000042429/ENSMUSG00000033208/ENSMUSG00000027584/ENSMUSG00000034997/ENSMUSG00000030209/ENSMUSG00000003657/ENSMUSG00000020734/ENSMUSG00000020886/ENSMUSG00000039953/ENSMUSG00000022840/ENSMUSG00000021313/ENSMUSG00000030666/ENSMUSG00000078566/ENSMUSG00000018634/ENSMUSG00000019828/ENSMUSG00000030669/ENSMUSG00000032011/ENSMUSG00000031883/ENSMUSG00000038967/ENSMUSG00000061603/…	89
377	Down	GO:1901379	regulation of potassium ion transmembrane transport	19/1598	86/21087	1.8614E-05	0.000389116	0.000332625	ENSMUSG00000061603/ENSMUSG00000040136/ENSMUSG00000027030/ENSMUSG00000020894/ENSMUSG00000037989/ENSMUSG00000069601/ENSMUSG00000052374/ENSMUSG00000028931/ENSMUSG00000047976/ENSMUSG00000038319/ENSMUSG00000028136/ENSMUSG00000050947/ENSMUSG00000058975/ENSMUSG00000074575/ENSMUSG00000079056/ENSMUSG00000061576/ENSMUSG00000026576/ENSMUSG00000053519/ENSMUSG00000027827	19
378	Down	GO:0051961	negative regulation of nervous system development	51/1598	367/21087	1.89292E-05	0.000393359	0.000336252	ENSMUSG00000048895/ENSMUSG00000059146/ENSMUSG00000005469/ENSMUSG00000022812/ENSMUSG00000038264/ENSMUSG00000038807/ENSMUSG00000032011/ENSMUSG00000029603/ENSMUSG00000055725/ENSMUSG00000028161/ENSMUSG00000000632/ENSMUSG00000057531/ENSMUSG00000057177/ENSMUSG00000041351/ENSMUSG00000040136/ENSMUSG00000029512/ENSMUSG00000048001/ENSMUSG00000042105/ENSMUSG00000039313/ENSMUSG00000028519/ENSMUSG00000062991/…	51
379	Down	GO:0014046	dopamine secretion	13/1598	45/21087	1.89667E-05	0.000393359	0.000336252	ENSMUSG00000023064/ENSMUSG00000034997/ENSMUSG00000027577/ENSMUSG00000030731/ENSMUSG00000024743/ENSMUSG00000090223/ENSMUSG00000028756/ENSMUSG00000057531/ENSMUSG00000040724/ENSMUSG00000024462/ENSMUSG00000027220/ENSMUSG00000057880/ENSMUSG00000026452	13
380	Down	GO:0014059	regulation of dopamine secretion	13/1598	45/21087	1.89667E-05	0.000393359	0.000336252	ENSMUSG00000023064/ENSMUSG00000034997/ENSMUSG00000027577/ENSMUSG00000030731/ENSMUSG00000024743/ENSMUSG00000090223/ENSMUSG00000028756/ENSMUSG00000057531/ENSMUSG00000040724/ENSMUSG00000024462/ENSMUSG00000027220/ENSMUSG00000057880/ENSMUSG00000026452	13
381	Down	GO:0018209	peptidyl-serine modification	49/1598	348/21087	1.92921E-05	0.000399059	0.000341124	ENSMUSG00000048895/ENSMUSG00000037012/ENSMUSG00000057897/ENSMUSG00000020366/ENSMUSG00000059146/ENSMUSG00000005469/ENSMUSG00000022812/ENSMUSG00000019699/ENSMUSG00000028991/ENSMUSG00000053046/ENSMUSG00000003345/ENSMUSG00000033618/ENSMUSG00000035390/ENSMUSG00000028756/ENSMUSG00000024858/ENSMUSG00000038967/ENSMUSG00000030110/ENSMUSG00000055725/ENSMUSG00000045038/ENSMUSG00000040390/ENSMUSG00000027805/…	49
382	Down	GO:0008344	adult locomotory behavior	22/1598	109/21087	1.94027E-05	0.000400294	0.00034218	ENSMUSG00000023064/ENSMUSG00000026825/ENSMUSG00000029223/ENSMUSG00000000263/ENSMUSG00000000632/ENSMUSG00000051790/ENSMUSG00000058153/ENSMUSG00000042105/ENSMUSG00000026959/ENSMUSG00000030683/ENSMUSG00000028519/ENSMUSG00000002771/ENSMUSG00000034656/ENSMUSG00000051331/ENSMUSG00000011751/ENSMUSG00000063142/ENSMUSG00000028020/ENSMUSG00000040907/ENSMUSG00000038718/ENSMUSG00000060240/ENSMUSG00000064329/…	22
383	Down	GO:0032414	positive regulation of ion transmembrane transporter activity	23/1598	117/21087	1.98574E-05	0.000407559	0.00034839	ENSMUSG00000019146/ENSMUSG00000021313/ENSMUSG00000022623/ENSMUSG00000028756/ENSMUSG00000024065/ENSMUSG00000061603/ENSMUSG00000096146/ENSMUSG00000049422/ENSMUSG00000040136/ENSMUSG00000006930/ENSMUSG00000004035/ENSMUSG00000028854/ENSMUSG00000027030/ENSMUSG00000022602/ENSMUSG00000037989/ENSMUSG00000069601/ENSMUSG00000052374/ENSMUSG00000047976/ENSMUSG00000050947/ENSMUSG00000058975/ENSMUSG00000029359/…	23
384	Down	GO:0007154	cell communication	576/1598	6617/21087	1.98582E-05	0.000407559	0.00034839	ENSMUSG00000066392/ENSMUSG00000017737/ENSMUSG00000020099/ENSMUSG00000032336/ENSMUSG00000020891/ENSMUSG00000036585/ENSMUSG00000024277/ENSMUSG00000042429/ENSMUSG00000047507/ENSMUSG00000024524/ENSMUSG00000033208/ENSMUSG00000021684/ENSMUSG00000027895/ENSMUSG00000024186/ENSMUSG00000050148/ENSMUSG00000021708/ENSMUSG00000025407/ENSMUSG00000023064/ENSMUSG00000035953/ENSMUSG00000027223/ENSMUSG00000072214/…	576
385	Down	GO:0099175	regulation of postsynapse organization	24/1598	126/21087	2.29201E-05	0.000469178	0.000401063	ENSMUSG00000048895/ENSMUSG00000030209/ENSMUSG00000057897/ENSMUSG00000060780/ENSMUSG00000059146/ENSMUSG00000022623/ENSMUSG00000042700/ENSMUSG00000031654/ENSMUSG00000025582/ENSMUSG00000030098/ENSMUSG00000042589/ENSMUSG00000049551/ENSMUSG00000025656/ENSMUSG00000057531/ENSMUSG00000033389/ENSMUSG00000025920/ENSMUSG00000026959/ENSMUSG00000032827/ENSMUSG00000022602/ENSMUSG00000030600/ENSMUSG00000047085/…	24
386	Down	GO:0015812	gamma-aminobutyric acid transport	8/1598	18/21087	2.34605E-05	0.000476526	0.000407344	ENSMUSG00000030310/ENSMUSG00000024897/ENSMUSG00000024462/ENSMUSG00000057880/ENSMUSG00000039059/ENSMUSG00000034656/ENSMUSG00000038486/ENSMUSG00000037771	8
387	Down	GO:0099150	regulation of postsynaptic specialization assembly	8/1598	18/21087	2.34605E-05	0.000476526	0.000407344	ENSMUSG00000060780/ENSMUSG00000059146/ENSMUSG00000042700/ENSMUSG00000031654/ENSMUSG00000025582/ENSMUSG00000025656/ENSMUSG00000030600/ENSMUSG00000047085	8
388	Down	GO:0150052	regulation of postsynapse assembly	8/1598	18/21087	2.34605E-05	0.000476526	0.000407344	ENSMUSG00000060780/ENSMUSG00000059146/ENSMUSG00000042700/ENSMUSG00000031654/ENSMUSG00000025582/ENSMUSG00000025656/ENSMUSG00000030600/ENSMUSG00000047085	8
389	Down	GO:0015872	dopamine transport	15/1598	59/21087	2.40642E-05	0.000486663	0.000416009	ENSMUSG00000023064/ENSMUSG00000034997/ENSMUSG00000027577/ENSMUSG00000030731/ENSMUSG00000024743/ENSMUSG00000090223/ENSMUSG00000028756/ENSMUSG00000048142/ENSMUSG00000057531/ENSMUSG00000040724/ENSMUSG00000024462/ENSMUSG00000027220/ENSMUSG00000057880/ENSMUSG00000026452/ENSMUSG00000003411	15
390	Down	GO:0042592	homeostatic process	191/1598	1901/21087	2.4083E-05	0.000486663	0.000416009	ENSMUSG00000032336/ENSMUSG00000042429/ENSMUSG00000047507/ENSMUSG00000033208/ENSMUSG00000021684/ENSMUSG00000027584/ENSMUSG00000034997/ENSMUSG00000037012/ENSMUSG00000030209/ENSMUSG00000003657/ENSMUSG00000020734/ENSMUSG00000021816/ENSMUSG00000029167/ENSMUSG00000003575/ENSMUSG00000019997/ENSMUSG00000005469/ENSMUSG00000020886/ENSMUSG00000039953/ENSMUSG00000022840/ENSMUSG00000021313/ENSMUSG00000030666/…	191
391	Down	GO:1902653	secondary alcohol biosynthetic process	13/1598	46/21087	2.46156E-05	0.000496153	0.000424122	ENSMUSG00000036585/ENSMUSG00000045294/ENSMUSG00000059743/ENSMUSG00000034926/ENSMUSG00000027952/ENSMUSG00000006517/ENSMUSG00000041939/ENSMUSG00000093930/ENSMUSG00000001467/ENSMUSG00000021252/ENSMUSG00000032018/ENSMUSG00000024799/ENSMUSG00000058454	13
392	Down	GO:0006814	sodium ion transport	34/1598	212/21087	2.5339E-05	0.000509429	0.000435471	ENSMUSG00000023017/ENSMUSG00000019699/ENSMUSG00000079055/ENSMUSG00000009292/ENSMUSG00000028854/ENSMUSG00000027030/ENSMUSG00000029361/ENSMUSG00000037989/ENSMUSG00000037578/ENSMUSG00000069601/ENSMUSG00000019194/ENSMUSG00000011751/ENSMUSG00000040907/ENSMUSG00000038437/ENSMUSG00000029359/ENSMUSG00000036578/ENSMUSG00000032338/ENSMUSG00000022462/ENSMUSG00000014786/ENSMUSG00000070304/ENSMUSG00000022742/…	34
393	Down	GO:0050768	negative regulation of neurogenesis	48/1598	342/21087	2.54137E-05	0.000509632	0.000435644	ENSMUSG00000048895/ENSMUSG00000059146/ENSMUSG00000022812/ENSMUSG00000038264/ENSMUSG00000038807/ENSMUSG00000032011/ENSMUSG00000029603/ENSMUSG00000055725/ENSMUSG00000028161/ENSMUSG00000000632/ENSMUSG00000057531/ENSMUSG00000057177/ENSMUSG00000041351/ENSMUSG00000040136/ENSMUSG00000029512/ENSMUSG00000048001/ENSMUSG00000042105/ENSMUSG00000039313/ENSMUSG00000028519/ENSMUSG00000062991/ENSMUSG00000057455/…	48
394	Down	GO:0010977	negative regulation of neuron projection development	30/1598	177/21087	2.55272E-05	0.000510608	0.000436478	ENSMUSG00000048895/ENSMUSG00000022812/ENSMUSG00000038264/ENSMUSG00000038807/ENSMUSG00000032011/ENSMUSG00000055725/ENSMUSG00000028161/ENSMUSG00000000632/ENSMUSG00000057531/ENSMUSG00000057177/ENSMUSG00000029512/ENSMUSG00000042105/ENSMUSG00000039313/ENSMUSG00000028519/ENSMUSG00000057455/ENSMUSG00000024501/ENSMUSG00000029516/ENSMUSG00000000627/ENSMUSG00000029291/ENSMUSG00000034570/ENSMUSG00000015291/…	30
395	Down	GO:0051240	positive regulation of multicellular organismal process	195/1598	1952/21087	2.76784E-05	0.000552237	0.000472063	ENSMUSG00000017737/ENSMUSG00000020891/ENSMUSG00000036585/ENSMUSG00000024277/ENSMUSG00000033208/ENSMUSG00000025407/ENSMUSG00000027584/ENSMUSG00000028546/ENSMUSG00000034997/ENSMUSG00000037012/ENSMUSG00000057897/ENSMUSG00000025151/ENSMUSG00000029167/ENSMUSG00000058441/ENSMUSG00000020366/ENSMUSG00000003575/ENSMUSG00000041670/ENSMUSG00000060780/ENSMUSG00000059146/ENSMUSG00000032537/ENSMUSG00000006435/…	195
396	Down	GO:0051932	synaptic transmission, GABAergic	14/1598	53/21087	2.80482E-05	0.000558201	0.000477162	ENSMUSG00000042429/ENSMUSG00000026797/ENSMUSG00000026825/ENSMUSG00000036062/ENSMUSG00000031883/ENSMUSG00000030310/ENSMUSG00000051790/ENSMUSG00000045038/ENSMUSG00000006930/ENSMUSG00000030043/ENSMUSG00000008153/ENSMUSG00000030898/ENSMUSG00000055078/ENSMUSG00000031340	14
397	Down	GO:0050805	negative regulation of synaptic transmission	18/1598	81/21087	2.81843E-05	0.000559498	0.000478271	ENSMUSG00000042429/ENSMUSG00000034997/ENSMUSG00000026797/ENSMUSG00000023017/ENSMUSG00000022623/ENSMUSG00000031654/ENSMUSG00000051149/ENSMUSG00000026179/ENSMUSG00000030310/ENSMUSG00000050556/ENSMUSG00000024462/ENSMUSG00000063434/ENSMUSG00000041115/ENSMUSG00000025920/ENSMUSG00000028631/ENSMUSG00000032827/ENSMUSG00000024268/ENSMUSG00000022602	18
398	Down	GO:0060052	neurofilament cytoskeleton organization	6/1598	10/21087	3.01871E-05	0.000596783	0.000510142	ENSMUSG00000020396/ENSMUSG00000021983/ENSMUSG00000022054/ENSMUSG00000018736/ENSMUSG00000022055/ENSMUSG00000034336	6
399	Down	GO:0099151	regulation of postsynaptic density assembly	7/1598	14/21087	3.0214E-05	0.000596783	0.000510142	ENSMUSG00000060780/ENSMUSG00000059146/ENSMUSG00000042700/ENSMUSG00000031654/ENSMUSG00000025582/ENSMUSG00000030600/ENSMUSG00000047085	7
400	Down	GO:0021953	central nervous system neuron differentiation	35/1598	223/21087	3.09573E-05	0.000609936	0.000521386	ENSMUSG00000005045/ENSMUSG00000032537/ENSMUSG00000022623/ENSMUSG00000031654/ENSMUSG00000021466/ENSMUSG00000031548/ENSMUSG00000029512/ENSMUSG00000048001/ENSMUSG00000022883/ENSMUSG00000058230/ENSMUSG00000023011/ENSMUSG00000033253/ENSMUSG00000030302/ENSMUSG00000034656/ENSMUSG00000056124/ENSMUSG00000019194/ENSMUSG00000025369/ENSMUSG00000018736/ENSMUSG00000015222/ENSMUSG00000011751/ENSMUSG00000049556/…	35
401	Down	GO:0000226	microtubule cytoskeleton organization	89/1598	765/21087	3.25128E-05	0.000638987	0.000546219	ENSMUSG00000024277/ENSMUSG00000048895/ENSMUSG00000006435/ENSMUSG00000022812/ENSMUSG00000020135/ENSMUSG00000053046/ENSMUSG00000035390/ENSMUSG00000033862/ENSMUSG00000024065/ENSMUSG00000027254/ENSMUSG00000027581/ENSMUSG00000057177/ENSMUSG00000006930/ENSMUSG00000029053/ENSMUSG00000090100/ENSMUSG00000058230/ENSMUSG00000007564/ENSMUSG00000036825/ENSMUSG00000020396/ENSMUSG00000039515/ENSMUSG00000028975/…	89
402	Down	GO:0060047	heart contraction	34/1598	215/21087	3.40886E-05	0.00066829	0.000571268	ENSMUSG00000042429/ENSMUSG00000031748/ENSMUSG00000019997/ENSMUSG00000021313/ENSMUSG00000037010/ENSMUSG00000028991/ENSMUSG00000024962/ENSMUSG00000030669/ENSMUSG00000024858/ENSMUSG00000024065/ENSMUSG00000061603/ENSMUSG00000021194/ENSMUSG00000020635/ENSMUSG00000057177/ENSMUSG00000028854/ENSMUSG00000028963/ENSMUSG00000029361/ENSMUSG00000050541/ENSMUSG00000010066/ENSMUSG00000025579/ENSMUSG00000019194/…	34
403	Down	GO:0031338	regulation of vesicle fusion	11/1598	35/21087	3.47377E-05	0.000679325	0.000580701	ENSMUSG00000026797/ENSMUSG00000031840/ENSMUSG00000030731/ENSMUSG00000024743/ENSMUSG00000033615/ENSMUSG00000025867/ENSMUSG00000034216/ENSMUSG00000003378/ENSMUSG00000045114/ENSMUSG00000030337/ENSMUSG00000026452	11
404	Down	GO:0030048	actin filament-based movement	22/1598	113/21087	3.48752E-05	0.000680326	0.000581557	ENSMUSG00000042429/ENSMUSG00000021313/ENSMUSG00000061603/ENSMUSG00000029361/ENSMUSG00000041794/ENSMUSG00000019194/ENSMUSG00000051331/ENSMUSG00000038319/ENSMUSG00000030770/ENSMUSG00000021262/ENSMUSG00000020900/ENSMUSG00000020866/ENSMUSG00000030739/ENSMUSG00000037032/ENSMUSG00000086040/ENSMUSG00000032338/ENSMUSG00000070304/ENSMUSG00000064329/ENSMUSG00000046480/ENSMUSG00000049281/ENSMUSG00000053093/…	22
405	Down	GO:1900271	regulation of long-term synaptic potentiation	14/1598	54/21087	3.52453E-05	0.000685848	0.000586277	ENSMUSG00000042429/ENSMUSG00000003657/ENSMUSG00000003575/ENSMUSG00000031840/ENSMUSG00000022812/ENSMUSG00000022623/ENSMUSG00000030854/ENSMUSG00000029126/ENSMUSG00000021259/ENSMUSG00000029361/ENSMUSG00000020431/ENSMUSG00000032827/ENSMUSG00000022602/ENSMUSG00000053310	14
406	Down	GO:0034643	establishment of mitochondrion localization, microtubule-mediated	8/1598	19/21087	3.78302E-05	0.000730781	0.000624687	ENSMUSG00000029223/ENSMUSG00000006930/ENSMUSG00000025733/ENSMUSG00000032118/ENSMUSG00000052727/ENSMUSG00000055407/ENSMUSG00000022055/ENSMUSG00000063077	8
407	Down	GO:0047497	mitochondrion transport along microtubule	8/1598	19/21087	3.78302E-05	0.000730781	0.000624687	ENSMUSG00000029223/ENSMUSG00000006930/ENSMUSG00000025733/ENSMUSG00000032118/ENSMUSG00000052727/ENSMUSG00000055407/ENSMUSG00000022055/ENSMUSG00000063077	8
408	Down	GO:0048675	axon extension	25/1598	138/21087	3.78326E-05	0.000730781	0.000624687	ENSMUSG00000048895/ENSMUSG00000059146/ENSMUSG00000022812/ENSMUSG00000038264/ENSMUSG00000029673/ENSMUSG00000033618/ENSMUSG00000051149/ENSMUSG00000029512/ENSMUSG00000062991/ENSMUSG00000023951/ENSMUSG00000029674/ENSMUSG00000000627/ENSMUSG00000029291/ENSMUSG00000006057/ENSMUSG00000018736/ENSMUSG00000015291/ENSMUSG00000015222/ENSMUSG00000038777/ENSMUSG00000000305/ENSMUSG00000026833/ENSMUSG00000052727/…	25
409	Down	GO:0045665	negative regulation of neuron differentiation	39/1598	262/21087	3.84372E-05	0.000740644	0.000633118	ENSMUSG00000048895/ENSMUSG00000022812/ENSMUSG00000038264/ENSMUSG00000038807/ENSMUSG00000032011/ENSMUSG00000029603/ENSMUSG00000055725/ENSMUSG00000028161/ENSMUSG00000000632/ENSMUSG00000057531/ENSMUSG00000057177/ENSMUSG00000041351/ENSMUSG00000029512/ENSMUSG00000048001/ENSMUSG00000042105/ENSMUSG00000039313/ENSMUSG00000028519/ENSMUSG00000057455/ENSMUSG00000024501/ENSMUSG00000024735/ENSMUSG00000029516/…	39
410	Down	GO:1901019	regulation of calcium ion transmembrane transporter activity	18/1598	83/21087	3.98792E-05	0.000766555	0.000655267	ENSMUSG00000027584/ENSMUSG00000021313/ENSMUSG00000018634/ENSMUSG00000024065/ENSMUSG00000061603/ENSMUSG00000020635/ENSMUSG00000025318/ENSMUSG00000006930/ENSMUSG00000004035/ENSMUSG00000028854/ENSMUSG00000034656/ENSMUSG00000033788/ENSMUSG00000028785/ENSMUSG00000020882/ENSMUSG00000035640/ENSMUSG00000017400/ENSMUSG00000038473/ENSMUSG00000026576	18
411	Down	GO:0060560	developmental growth involved in morphogenesis	40/1598	272/21087	4.07259E-05	0.000780926	0.000667552	ENSMUSG00000036585/ENSMUSG00000048895/ENSMUSG00000041670/ENSMUSG00000059146/ENSMUSG00000022812/ENSMUSG00000030731/ENSMUSG00000038264/ENSMUSG00000029673/ENSMUSG00000033618/ENSMUSG00000020340/ENSMUSG00000051149/ENSMUSG00000031548/ENSMUSG00000029512/ENSMUSG00000022883/ENSMUSG00000029053/ENSMUSG00000026452/ENSMUSG00000062991/ENSMUSG00000023951/ENSMUSG00000039114/ENSMUSG00000029674/ENSMUSG00000004892/…	40
412	Down	GO:0009060	aerobic respiration	17/1598	76/21087	4.2678E-05	0.000816373	0.000697852	ENSMUSG00000078566/ENSMUSG00000059734/ENSMUSG00000003072/ENSMUSG00000020153/ENSMUSG00000064351/ENSMUSG00000000088/ENSMUSG00000041697/ENSMUSG00000021577/ENSMUSG00000005683/ENSMUSG00000031818/ENSMUSG00000061518/ENSMUSG00000064341/ENSMUSG00000027406/ENSMUSG00000019179/ENSMUSG00000020321/ENSMUSG00000022477/ENSMUSG00000032279	17
413	Down	GO:0030072	peptide hormone secretion	41/1598	282/21087	4.28676E-05	0.000818013	0.000699255	ENSMUSG00000047507/ENSMUSG00000021684/ENSMUSG00000021816/ENSMUSG00000022840/ENSMUSG00000024743/ENSMUSG00000018634/ENSMUSG00000037010/ENSMUSG00000053046/ENSMUSG00000061393/ENSMUSG00000051343/ENSMUSG00000054459/ENSMUSG00000028445/ENSMUSG00000033615/ENSMUSG00000096146/ENSMUSG00000028161/ENSMUSG00000021647/ENSMUSG00000051790/ENSMUSG00000045038/ENSMUSG00000021194/ENSMUSG00000037428/ENSMUSG00000030805/…	41
414	Down	GO:0051648	vesicle localization	58/1598	448/21087	4.31652E-05	0.000821703	0.000702409	ENSMUSG00000026825/ENSMUSG00000006435/ENSMUSG00000031840/ENSMUSG00000024948/ENSMUSG00000033862/ENSMUSG00000074238/ENSMUSG00000024065/ENSMUSG00000024873/ENSMUSG00000051790/ENSMUSG00000057531/ENSMUSG00000040687/ENSMUSG00000006930/ENSMUSG00000029053/ENSMUSG00000090100/ENSMUSG00000058230/ENSMUSG00000037217/ENSMUSG00000041794/ENSMUSG00000036825/ENSMUSG00000030397/ENSMUSG00000009394/ENSMUSG00000047766/…	58
415	Down	GO:0032984	protein-containing complex disassembly	37/1598	245/21087	4.38705E-05	0.000831644	0.000710907	ENSMUSG00000020135/ENSMUSG00000078566/ENSMUSG00000027254/ENSMUSG00000050357/ENSMUSG00000032187/ENSMUSG00000027438/ENSMUSG00000034187/ENSMUSG00000027581/ENSMUSG00000049422/ENSMUSG00000040136/ENSMUSG00000090100/ENSMUSG00000022099/ENSMUSG00000006024/ENSMUSG00000062991/ENSMUSG00000021288/ENSMUSG00000028975/ENSMUSG00000030000/ENSMUSG00000033788/ENSMUSG00000052374/ENSMUSG00000025369/ENSMUSG00000004567/…	37
416	Down	GO:0034767	positive regulation of ion transmembrane transport	30/1598	182/21087	4.38985E-05	0.000831644	0.000710907	ENSMUSG00000019146/ENSMUSG00000021313/ENSMUSG00000022623/ENSMUSG00000032011/ENSMUSG00000028756/ENSMUSG00000024065/ENSMUSG00000061603/ENSMUSG00000096146/ENSMUSG00000049422/ENSMUSG00000040136/ENSMUSG00000006930/ENSMUSG00000004035/ENSMUSG00000028854/ENSMUSG00000027030/ENSMUSG00000029361/ENSMUSG00000022602/ENSMUSG00000037989/ENSMUSG00000069601/ENSMUSG00000052374/ENSMUSG00000031633/ENSMUSG00000051331/…	30
417	Down	GO:0016311	dephosphorylation	50/1598	369/21087	4.441E-05	0.000838774	0.000717002	ENSMUSG00000042429/ENSMUSG00000035953/ENSMUSG00000017897/ENSMUSG00000021816/ENSMUSG00000024777/ENSMUSG00000037887/ENSMUSG00000006476/ENSMUSG00000028756/ENSMUSG00000069255/ENSMUSG00000028161/ENSMUSG00000030854/ENSMUSG00000020635/ENSMUSG00000042105/ENSMUSG00000038976/ENSMUSG00000007564/ENSMUSG00000036398/ENSMUSG00000018326/ENSMUSG00000042662/ENSMUSG00000068742/ENSMUSG00000014592/ENSMUSG00000046442/…	50
418	Down	GO:0048519	negative regulation of biological process	474/1598	5370/21087	4.44877E-05	0.000838774	0.000717002	ENSMUSG00000017737/ENSMUSG00000020099/ENSMUSG00000032336/ENSMUSG00000020891/ENSMUSG00000042429/ENSMUSG00000033208/ENSMUSG00000021684/ENSMUSG00000027895/ENSMUSG00000024186/ENSMUSG00000050148/ENSMUSG00000025407/ENSMUSG00000023064/ENSMUSG00000027223/ENSMUSG00000027584/ENSMUSG00000031748/ENSMUSG00000028546/ENSMUSG00000022619/ENSMUSG00000017897/ENSMUSG00000050132/ENSMUSG00000034997/ENSMUSG00000048895/…	474
419	Down	GO:0099084	postsynaptic specialization organization	12/1598	42/21087	4.46689E-05	0.00084018	0.000718203	ENSMUSG00000060780/ENSMUSG00000059146/ENSMUSG00000022623/ENSMUSG00000042700/ENSMUSG00000031654/ENSMUSG00000025582/ENSMUSG00000051790/ENSMUSG00000025656/ENSMUSG00000038738/ENSMUSG00000030600/ENSMUSG00000047085/ENSMUSG00000033768	12
420	Down	GO:0010256	endomembrane system organization	53/1598	399/21087	4.57906E-05	0.000857783	0.000733251	ENSMUSG00000047507/ENSMUSG00000026825/ENSMUSG00000031840/ENSMUSG00000000552/ENSMUSG00000024743/ENSMUSG00000024065/ENSMUSG00000057531/ENSMUSG00000034216/ENSMUSG00000032867/ENSMUSG00000003341/ENSMUSG00000027257/ENSMUSG00000024758/ENSMUSG00000033579/ENSMUSG00000069601/ENSMUSG00000010086/ENSMUSG00000033788/ENSMUSG00000029516/ENSMUSG00000038039/ENSMUSG00000031865/ENSMUSG00000020198/ENSMUSG00000070000/…	53
421	Down	GO:0021578	hindbrain maturation	5/1598	7/21087	4.58224E-05	0.000857783	0.000733251	ENSMUSG00000048895/ENSMUSG00000026959/ENSMUSG00000034656/ENSMUSG00000090071/ENSMUSG00000060240	5
422	Down	GO:0097106	postsynaptic density organization	11/1598	36/21087	4.66142E-05	0.000870537	0.000744153	ENSMUSG00000060780/ENSMUSG00000059146/ENSMUSG00000022623/ENSMUSG00000042700/ENSMUSG00000031654/ENSMUSG00000025582/ENSMUSG00000051790/ENSMUSG00000038738/ENSMUSG00000030600/ENSMUSG00000047085/ENSMUSG00000033768	11
423	Down	GO:0007018	microtubule-based movement	69/1598	562/21087	4.78161E-05	0.000890871	0.000761535	ENSMUSG00000006435/ENSMUSG00000029223/ENSMUSG00000033862/ENSMUSG00000024065/ENSMUSG00000027254/ENSMUSG00000024873/ENSMUSG00000057531/ENSMUSG00000040687/ENSMUSG00000024163/ENSMUSG00000006930/ENSMUSG00000030043/ENSMUSG00000029053/ENSMUSG00000090100/ENSMUSG00000058230/ENSMUSG00000025920/ENSMUSG00000036825/ENSMUSG00000021288/ENSMUSG00000020396/ENSMUSG00000028975/ENSMUSG00000037351/ENSMUSG00000030397/…	69
424	Down	GO:0046879	hormone secretion	49/1598	361/21087	5.04254E-05	0.000936114	0.00080021	ENSMUSG00000042429/ENSMUSG00000047507/ENSMUSG00000021684/ENSMUSG00000021816/ENSMUSG00000022840/ENSMUSG00000024743/ENSMUSG00000018634/ENSMUSG00000037010/ENSMUSG00000053046/ENSMUSG00000061393/ENSMUSG00000051343/ENSMUSG00000054459/ENSMUSG00000028445/ENSMUSG00000033615/ENSMUSG00000096146/ENSMUSG00000028161/ENSMUSG00000027273/ENSMUSG00000021647/ENSMUSG00000051790/ENSMUSG00000045038/ENSMUSG00000037098/…	49
425	Down	GO:0010469	regulation of signaling receptor activity	24/1598	132/21087	5.0482E-05	0.000936114	0.00080021	ENSMUSG00000042429/ENSMUSG00000021708/ENSMUSG00000022619/ENSMUSG00000019146/ENSMUSG00000029167/ENSMUSG00000006435/ENSMUSG00000024777/ENSMUSG00000027577/ENSMUSG00000020886/ENSMUSG00000022623/ENSMUSG00000032356/ENSMUSG00000025582/ENSMUSG00000028756/ENSMUSG00000029608/ENSMUSG00000057615/ENSMUSG00000059991/ENSMUSG00000024873/ENSMUSG00000037224/ENSMUSG00000051790/ENSMUSG00000022594/ENSMUSG00000040867/…	24
426	Down	GO:1904064	positive regulation of cation transmembrane transport	28/1598	166/21087	5.11534E-05	0.000946338	0.00080895	ENSMUSG00000019146/ENSMUSG00000021313/ENSMUSG00000022623/ENSMUSG00000032011/ENSMUSG00000028756/ENSMUSG00000024065/ENSMUSG00000061603/ENSMUSG00000096146/ENSMUSG00000049422/ENSMUSG00000040136/ENSMUSG00000006930/ENSMUSG00000004035/ENSMUSG00000028854/ENSMUSG00000029361/ENSMUSG00000022602/ENSMUSG00000037989/ENSMUSG00000069601/ENSMUSG00000052374/ENSMUSG00000031633/ENSMUSG00000051331/ENSMUSG00000047976/…	28
427	Down	GO:0030003	cellular cation homeostasis	77/1598	647/21087	5.16616E-05	0.000953502	0.000815073	ENSMUSG00000032336/ENSMUSG00000033208/ENSMUSG00000027584/ENSMUSG00000034997/ENSMUSG00000030209/ENSMUSG00000003657/ENSMUSG00000020734/ENSMUSG00000020886/ENSMUSG00000039953/ENSMUSG00000022840/ENSMUSG00000021313/ENSMUSG00000030666/ENSMUSG00000078566/ENSMUSG00000018634/ENSMUSG00000019828/ENSMUSG00000030669/ENSMUSG00000032011/ENSMUSG00000031883/ENSMUSG00000061603/ENSMUSG00000049551/ENSMUSG00000045038/…	77
428	Down	GO:0010721	negative regulation of cell development	52/1598	391/21087	5.20901E-05	0.000959163	0.000819912	ENSMUSG00000048895/ENSMUSG00000059146/ENSMUSG00000022812/ENSMUSG00000038264/ENSMUSG00000038807/ENSMUSG00000032011/ENSMUSG00000029603/ENSMUSG00000074238/ENSMUSG00000055725/ENSMUSG00000028161/ENSMUSG00000000632/ENSMUSG00000057531/ENSMUSG00000057177/ENSMUSG00000041351/ENSMUSG00000040136/ENSMUSG00000029512/ENSMUSG00000048001/ENSMUSG00000042105/ENSMUSG00000022099/ENSMUSG00000039313/ENSMUSG00000028519/…	52
429	Down	GO:0031115	negative regulation of microtubule polymerization	7/1598	15/21087	5.29394E-05	0.000970441	0.000829553	ENSMUSG00000062591/ENSMUSG00000030357/ENSMUSG00000034570/ENSMUSG00000015222/ENSMUSG00000040811/ENSMUSG00000027500/ENSMUSG00000013921	7
430	Down	GO:0051261	protein depolymerization	22/1598	116/21087	5.29488E-05	0.000970441	0.000829553	ENSMUSG00000020135/ENSMUSG00000027254/ENSMUSG00000050357/ENSMUSG00000027581/ENSMUSG00000090100/ENSMUSG00000022099/ENSMUSG00000030000/ENSMUSG00000033788/ENSMUSG00000052374/ENSMUSG00000064302/ENSMUSG00000015222/ENSMUSG00000021061/ENSMUSG00000028488/ENSMUSG00000044117/ENSMUSG00000038244/ENSMUSG00000044433/ENSMUSG00000027500/ENSMUSG00000057738/ENSMUSG00000052727/ENSMUSG00000021262/ENSMUSG00000028528/…	22
431	Down	GO:0035556	intracellular signal transduction	249/1598	2613/21087	5.33635E-05	0.000975773	0.000834111	ENSMUSG00000017737/ENSMUSG00000020099/ENSMUSG00000036585/ENSMUSG00000024277/ENSMUSG00000042429/ENSMUSG00000024524/ENSMUSG00000033208/ENSMUSG00000024186/ENSMUSG00000021708/ENSMUSG00000035953/ENSMUSG00000027223/ENSMUSG00000027584/ENSMUSG00000031748/ENSMUSG00000022619/ENSMUSG00000006575/ENSMUSG00000034997/ENSMUSG00000000296/ENSMUSG00000030209/ENSMUSG00000001366/ENSMUSG00000021816/ENSMUSG00000025151/…	249
432	Down	GO:0018105	peptidyl-serine phosphorylation	45/1598	323/21087	5.37304E-05	0.000980207	0.000837901	ENSMUSG00000048895/ENSMUSG00000037012/ENSMUSG00000057897/ENSMUSG00000020366/ENSMUSG00000059146/ENSMUSG00000005469/ENSMUSG00000022812/ENSMUSG00000019699/ENSMUSG00000028991/ENSMUSG00000053046/ENSMUSG00000003345/ENSMUSG00000033618/ENSMUSG00000035390/ENSMUSG00000028756/ENSMUSG00000024858/ENSMUSG00000038967/ENSMUSG00000030110/ENSMUSG00000055725/ENSMUSG00000045038/ENSMUSG00000040390/ENSMUSG00000027805/…	45
433	Down	GO:0030036	actin cytoskeleton organization	79/1598	669/21087	5.40604E-05	0.000983949	0.0008411	ENSMUSG00000048895/ENSMUSG00000059146/ENSMUSG00000019997/ENSMUSG00000059981/ENSMUSG00000040797/ENSMUSG00000025499/ENSMUSG00000022623/ENSMUSG00000029673/ENSMUSG00000028991/ENSMUSG00000053046/ENSMUSG00000042700/ENSMUSG00000033862/ENSMUSG00000034730/ENSMUSG00000026697/ENSMUSG00000074238/ENSMUSG00000030685/ENSMUSG00000050357/ENSMUSG00000045038/ENSMUSG00000027805/ENSMUSG00000057531/ENSMUSG00000031548/…	79
434	Down	GO:0007585	respiratory gaseous exchange by respiratory system	14/1598	56/21087	5.46244E-05	0.000991924	0.000847917	ENSMUSG00000042429/ENSMUSG00000031840/ENSMUSG00000027577/ENSMUSG00000037010/ENSMUSG00000002799/ENSMUSG00000000263/ENSMUSG00000051790/ENSMUSG00000024163/ENSMUSG00000026959/ENSMUSG00000025579/ENSMUSG00000026103/ENSMUSG00000033585/ENSMUSG00000038718/ENSMUSG00000055932	14
435	Down	GO:0055065	metal ion homeostasis	79/1598	670/21087	5.686E-05	0.001030146	0.00088059	ENSMUSG00000032336/ENSMUSG00000042429/ENSMUSG00000033208/ENSMUSG00000027584/ENSMUSG00000034997/ENSMUSG00000030209/ENSMUSG00000003657/ENSMUSG00000020734/ENSMUSG00000020886/ENSMUSG00000039953/ENSMUSG00000022840/ENSMUSG00000021313/ENSMUSG00000030666/ENSMUSG00000078566/ENSMUSG00000018634/ENSMUSG00000019828/ENSMUSG00000030669/ENSMUSG00000032011/ENSMUSG00000061603/ENSMUSG00000049551/ENSMUSG00000045038/…	79
436	Down	GO:0007005	mitochondrion organization	59/1598	463/21087	5.86575E-05	0.001060275	0.000906345	ENSMUSG00000017737/ENSMUSG00000017897/ENSMUSG00000029167/ENSMUSG00000020366/ENSMUSG00000031840/ENSMUSG00000022812/ENSMUSG00000019699/ENSMUSG00000078566/ENSMUSG00000019471/ENSMUSG00000025582/ENSMUSG00000028756/ENSMUSG00000030854/ENSMUSG00000049422/ENSMUSG00000057177/ENSMUSG00000029512/ENSMUSG00000006930/ENSMUSG00000006818/ENSMUSG00000024847/ENSMUSG00000028854/ENSMUSG00000054428/ENSMUSG00000028086/…	59
437	Down	GO:1900006	positive regulation of dendrite development	21/1598	109/21087	6.11416E-05	0.001102647	0.000942566	ENSMUSG00000028546/ENSMUSG00000057897/ENSMUSG00000003575/ENSMUSG00000006435/ENSMUSG00000035863/ENSMUSG00000022623/ENSMUSG00000028991/ENSMUSG00000023328/ENSMUSG00000055471/ENSMUSG00000042589/ENSMUSG00000000632/ENSMUSG00000051790/ENSMUSG00000025920/ENSMUSG00000032827/ENSMUSG00000062991/ENSMUSG00000038738/ENSMUSG00000032867/ENSMUSG00000052934/ENSMUSG00000040276/ENSMUSG00000025237/ENSMUSG00000042688	21
438	Down	GO:1902473	regulation of protein localization to synapse	10/1598	31/21087	6.14065E-05	0.001104896	0.000944488	ENSMUSG00000032336/ENSMUSG00000022812/ENSMUSG00000025499/ENSMUSG00000024873/ENSMUSG00000051790/ENSMUSG00000033389/ENSMUSG00000008153/ENSMUSG00000041115/ENSMUSG00000029053/ENSMUSG00000031153	10
439	Down	GO:0008016	regulation of heart contraction	29/1598	177/21087	6.5329E-05	0.001172796	0.00100253	ENSMUSG00000042429/ENSMUSG00000031748/ENSMUSG00000019997/ENSMUSG00000021313/ENSMUSG00000037010/ENSMUSG00000030669/ENSMUSG00000024858/ENSMUSG00000024065/ENSMUSG00000061603/ENSMUSG00000021194/ENSMUSG00000020635/ENSMUSG00000057177/ENSMUSG00000028854/ENSMUSG00000028963/ENSMUSG00000029361/ENSMUSG00000050541/ENSMUSG00000010066/ENSMUSG00000025579/ENSMUSG00000019194/ENSMUSG00000051331/ENSMUSG00000011751/…	29
440	Down	GO:0055114	oxidation-reduction process	109/1598	999/21087	6.76076E-05	0.001210944	0.00103514	ENSMUSG00000020891/ENSMUSG00000033208/ENSMUSG00000034997/ENSMUSG00000037012/ENSMUSG00000029167/ENSMUSG00000005469/ENSMUSG00000022812/ENSMUSG00000078566/ENSMUSG00000028991/ENSMUSG00000028756/ENSMUSG00000049422/ENSMUSG00000057177/ENSMUSG00000021259/ENSMUSG00000006818/ENSMUSG00000033253/ENSMUSG00000029361/ENSMUSG00000020176/ENSMUSG00000050541/ENSMUSG00000038412/ENSMUSG00000035011/ENSMUSG00000059734/…	109
441	Down	GO:0033555	multicellular organismal response to stress	20/1598	102/21087	7.01226E-05	0.001253143	0.001071213	ENSMUSG00000021684/ENSMUSG00000022619/ENSMUSG00000030209/ENSMUSG00000023017/ENSMUSG00000022623/ENSMUSG00000018634/ENSMUSG00000030669/ENSMUSG00000030110/ENSMUSG00000028161/ENSMUSG00000030043/ENSMUSG00000029361/ENSMUSG00000030898/ENSMUSG00000034656/ENSMUSG00000008855/ENSMUSG00000032532/ENSMUSG00000020402/ENSMUSG00000028351/ENSMUSG00000006711/ENSMUSG00000079056/ENSMUSG00000055078	20
442	Down	GO:0007420	brain development	75/1598	632/21087	7.06419E-05	0.001259568	0.001076704	ENSMUSG00000025407/ENSMUSG00000048895/ENSMUSG00000005045/ENSMUSG00000022812/ENSMUSG00000038264/ENSMUSG00000022623/ENSMUSG00000019699/ENSMUSG00000031654/ENSMUSG00000055471/ENSMUSG00000032187/ENSMUSG00000000632/ENSMUSG00000021466/ENSMUSG00000031548/ENSMUSG00000058153/ENSMUSG00000024163/ENSMUSG00000029512/ENSMUSG00000006930/ENSMUSG00000048001/ENSMUSG00000022883/ENSMUSG00000017631/ENSMUSG00000090100/…	75
443	Down	GO:0009914	hormone transport	49/1598	366/21087	7.15495E-05	0.001272871	0.001088076	ENSMUSG00000042429/ENSMUSG00000047507/ENSMUSG00000021684/ENSMUSG00000021816/ENSMUSG00000022840/ENSMUSG00000024743/ENSMUSG00000018634/ENSMUSG00000037010/ENSMUSG00000053046/ENSMUSG00000061393/ENSMUSG00000051343/ENSMUSG00000054459/ENSMUSG00000028445/ENSMUSG00000033615/ENSMUSG00000096146/ENSMUSG00000028161/ENSMUSG00000027273/ENSMUSG00000021647/ENSMUSG00000051790/ENSMUSG00000045038/ENSMUSG00000037098/…	49
444	Down	GO:0046785	microtubule polymerization	17/1598	79/21087	7.18277E-05	0.001274942	0.001089847	ENSMUSG00000062591/ENSMUSG00000030357/ENSMUSG00000031865/ENSMUSG00000034570/ENSMUSG00000018736/ENSMUSG00000064302/ENSMUSG00000015222/ENSMUSG00000035198/ENSMUSG00000051786/ENSMUSG00000040811/ENSMUSG00000044433/ENSMUSG00000027500/ENSMUSG00000013921/ENSMUSG00000052727/ENSMUSG00000045007/ENSMUSG00000029166/ENSMUSG00000028467	17
445	Down	GO:0022411	cellular component disassembly	53/1598	406/21087	7.28427E-05	0.001290052	0.001102764	ENSMUSG00000020135/ENSMUSG00000078566/ENSMUSG00000019471/ENSMUSG00000028756/ENSMUSG00000027254/ENSMUSG00000050357/ENSMUSG00000032187/ENSMUSG00000027438/ENSMUSG00000034187/ENSMUSG00000027581/ENSMUSG00000049422/ENSMUSG00000057177/ENSMUSG00000040136/ENSMUSG00000029512/ENSMUSG00000090100/ENSMUSG00000022099/ENSMUSG00000054428/ENSMUSG00000006024/ENSMUSG00000028086/ENSMUSG00000062991/ENSMUSG00000033124/…	53
446	Down	GO:1901879	regulation of protein depolymerization	18/1598	87/21087	7.68217E-05	0.00135747	0.001160394	ENSMUSG00000020135/ENSMUSG00000027254/ENSMUSG00000050357/ENSMUSG00000090100/ENSMUSG00000022099/ENSMUSG00000030000/ENSMUSG00000033788/ENSMUSG00000052374/ENSMUSG00000064302/ENSMUSG00000015222/ENSMUSG00000021061/ENSMUSG00000044117/ENSMUSG00000044433/ENSMUSG00000027500/ENSMUSG00000057738/ENSMUSG00000052727/ENSMUSG00000021262/ENSMUSG00000116165	18
447	Down	GO:0048639	positive regulation of developmental growth	33/1598	215/21087	8.04678E-05	0.00141862	0.001212666	ENSMUSG00000025407/ENSMUSG00000041670/ENSMUSG00000059146/ENSMUSG00000022812/ENSMUSG00000030731/ENSMUSG00000038264/ENSMUSG00000028991/ENSMUSG00000021974/ENSMUSG00000033618/ENSMUSG00000051149/ENSMUSG00000061603/ENSMUSG00000042817/ENSMUSG00000026452/ENSMUSG00000062991/ENSMUSG00000023951/ENSMUSG00000010066/ENSMUSG00000029674/ENSMUSG00000022212/ENSMUSG00000021983/ENSMUSG00000029291/ENSMUSG00000031633/…	33
448	Down	GO:0021587	cerebellum morphogenesis	13/1598	51/21087	8.06423E-05	0.00141862	0.001212666	ENSMUSG00000025407/ENSMUSG00000031654/ENSMUSG00000029512/ENSMUSG00000023011/ENSMUSG00000024039/ENSMUSG00000028519/ENSMUSG00000030302/ENSMUSG00000034656/ENSMUSG00000039137/ENSMUSG00000067889/ENSMUSG00000066129/ENSMUSG00000060240/ENSMUSG00000056596	13
449	Down	GO:1900449	regulation of glutamate receptor signaling pathway	14/1598	58/21087	8.27168E-05	0.001451874	0.001241092	ENSMUSG00000021708/ENSMUSG00000022619/ENSMUSG00000019146/ENSMUSG00000029167/ENSMUSG00000020886/ENSMUSG00000022623/ENSMUSG00000032356/ENSMUSG00000028756/ENSMUSG00000029608/ENSMUSG00000031837/ENSMUSG00000024873/ENSMUSG00000051790/ENSMUSG00000022602/ENSMUSG00000038738	14
450	Down	GO:0061387	regulation of extent of cell growth	23/1598	128/21087	8.66183E-05	0.001512588	0.001292991	ENSMUSG00000048895/ENSMUSG00000059146/ENSMUSG00000022812/ENSMUSG00000038264/ENSMUSG00000033618/ENSMUSG00000051149/ENSMUSG00000029512/ENSMUSG00000062991/ENSMUSG00000023951/ENSMUSG00000029674/ENSMUSG00000000627/ENSMUSG00000029291/ENSMUSG00000006057/ENSMUSG00000018736/ENSMUSG00000015291/ENSMUSG00000015222/ENSMUSG00000038777/ENSMUSG00000000305/ENSMUSG00000001313/ENSMUSG00000026833/ENSMUSG00000052727/…	23
451	Down	GO:0003015	heart process	34/1598	225/21087	8.67516E-05	0.001512588	0.001292991	ENSMUSG00000042429/ENSMUSG00000031748/ENSMUSG00000019997/ENSMUSG00000021313/ENSMUSG00000037010/ENSMUSG00000028991/ENSMUSG00000024962/ENSMUSG00000030669/ENSMUSG00000024858/ENSMUSG00000024065/ENSMUSG00000061603/ENSMUSG00000021194/ENSMUSG00000020635/ENSMUSG00000057177/ENSMUSG00000028854/ENSMUSG00000028963/ENSMUSG00000029361/ENSMUSG00000050541/ENSMUSG00000010066/ENSMUSG00000025579/ENSMUSG00000019194/…	34
452	Down	GO:0030073	insulin secretion	34/1598	225/21087	8.67516E-05	0.001512588	0.001292991	ENSMUSG00000047507/ENSMUSG00000021684/ENSMUSG00000021816/ENSMUSG00000022840/ENSMUSG00000024743/ENSMUSG00000053046/ENSMUSG00000061393/ENSMUSG00000051343/ENSMUSG00000054459/ENSMUSG00000028445/ENSMUSG00000033615/ENSMUSG00000096146/ENSMUSG00000028161/ENSMUSG00000021647/ENSMUSG00000051790/ENSMUSG00000045038/ENSMUSG00000021194/ENSMUSG00000037428/ENSMUSG00000030805/ENSMUSG00000020635/ENSMUSG00000031548/…	34
453	Down	GO:0021681	cerebellar granular layer development	7/1598	16/21087	8.79553E-05	0.001530189	0.001308037	ENSMUSG00000031654/ENSMUSG00000029512/ENSMUSG00000090100/ENSMUSG00000023011/ENSMUSG00000030302/ENSMUSG00000066129/ENSMUSG00000060240	7
454	Down	GO:0031333	negative regulation of protein-containing complex assembly	24/1598	137/21087	9.31137E-05	0.001612482	0.001378383	ENSMUSG00000026797/ENSMUSG00000022812/ENSMUSG00000029073/ENSMUSG00000050357/ENSMUSG00000028988/ENSMUSG00000027805/ENSMUSG00000029512/ENSMUSG00000045114/ENSMUSG00000029053/ENSMUSG00000022099/ENSMUSG00000028975/ENSMUSG00000030000/ENSMUSG00000062591/ENSMUSG00000030357/ENSMUSG00000034295/ENSMUSG00000034570/ENSMUSG00000015222/ENSMUSG00000021061/ENSMUSG00000040811/ENSMUSG00000035407/ENSMUSG00000027500/…	24
455	Down	GO:1905477	positive regulation of protein localization to membrane	20/1598	104/21087	9.31389E-05	0.001612482	0.001378383	ENSMUSG00000048895/ENSMUSG00000019146/ENSMUSG00000025499/ENSMUSG00000021567/ENSMUSG00000030098/ENSMUSG00000096146/ENSMUSG00000031837/ENSMUSG00000001507/ENSMUSG00000051790/ENSMUSG00000030805/ENSMUSG00000050556/ENSMUSG00000038976/ENSMUSG00000069601/ENSMUSG00000028785/ENSMUSG00000032883/ENSMUSG00000013921/ENSMUSG00000028136/ENSMUSG00000017400/ENSMUSG00000061576/ENSMUSG00000038949	20
456	Down	GO:0043254	regulation of protein-containing complex assembly	54/1598	420/21087	9.37863E-05	0.001612482	0.001378383	ENSMUSG00000026797/ENSMUSG00000020366/ENSMUSG00000041670/ENSMUSG00000031840/ENSMUSG00000024777/ENSMUSG00000022812/ENSMUSG00000028991/ENSMUSG00000029073/ENSMUSG00000028756/ENSMUSG00000039615/ENSMUSG00000074238/ENSMUSG00000050357/ENSMUSG00000020708/ENSMUSG00000028988/ENSMUSG00000027438/ENSMUSG00000045038/ENSMUSG00000027805/ENSMUSG00000034216/ENSMUSG00000029512/ENSMUSG00000030806/ENSMUSG00000045114/…	54
457	Down	GO:0006695	cholesterol biosynthetic process	12/1598	45/21087	9.39131E-05	0.001612482	0.001378383	ENSMUSG00000036585/ENSMUSG00000045294/ENSMUSG00000059743/ENSMUSG00000034926/ENSMUSG00000027952/ENSMUSG00000006517/ENSMUSG00000041939/ENSMUSG00000093930/ENSMUSG00000001467/ENSMUSG00000032018/ENSMUSG00000024799/ENSMUSG00000058454	12
458	Down	GO:0006904	vesicle docking involved in exocytosis	12/1598	45/21087	9.39131E-05	0.001612482	0.001378383	ENSMUSG00000072214/ENSMUSG00000026797/ENSMUSG00000041670/ENSMUSG00000031840/ENSMUSG00000030805/ENSMUSG00000003863/ENSMUSG00000034216/ENSMUSG00000050556/ENSMUSG00000030806/ENSMUSG00000020894/ENSMUSG00000003411/ENSMUSG00000033769	12
459	Down	GO:0019228	neuronal action potential	12/1598	45/21087	9.39131E-05	0.001612482	0.001378383	ENSMUSG00000027895/ENSMUSG00000040724/ENSMUSG00000069601/ENSMUSG00000063142/ENSMUSG00000047976/ENSMUSG00000005950/ENSMUSG00000020866/ENSMUSG00000030739/ENSMUSG00000022416/ENSMUSG00000061576/ENSMUSG00000064329/ENSMUSG00000023033	12
460	Down	GO:0006873	cellular ion homeostasis	77/1598	661/21087	0.000104348	0.001787758	0.001528213	ENSMUSG00000032336/ENSMUSG00000033208/ENSMUSG00000027584/ENSMUSG00000034997/ENSMUSG00000030209/ENSMUSG00000003657/ENSMUSG00000020734/ENSMUSG00000020886/ENSMUSG00000039953/ENSMUSG00000022840/ENSMUSG00000021313/ENSMUSG00000030666/ENSMUSG00000078566/ENSMUSG00000018634/ENSMUSG00000019828/ENSMUSG00000030669/ENSMUSG00000032011/ENSMUSG00000031883/ENSMUSG00000061603/ENSMUSG00000049551/ENSMUSG00000045038/…	77
461	Down	GO:0006820	anion transport	68/1598	566/21087	0.000104846	0.001792387	0.00153217	ENSMUSG00000042429/ENSMUSG00000028542/ENSMUSG00000026797/ENSMUSG00000037012/ENSMUSG00000030209/ENSMUSG00000020366/ENSMUSG00000030688/ENSMUSG00000028991/ENSMUSG00000029073/ENSMUSG00000031883/ENSMUSG00000000263/ENSMUSG00000030310/ENSMUSG00000057531/ENSMUSG00000024897/ENSMUSG00000024462/ENSMUSG00000027030/ENSMUSG00000057880/ENSMUSG00000039059/ENSMUSG00000034656/ENSMUSG00000003341/ENSMUSG00000038486/…	68
462	Down	GO:0030516	regulation of axon extension	21/1598	113/21087	0.000105235	0.001795137	0.001534521	ENSMUSG00000048895/ENSMUSG00000059146/ENSMUSG00000022812/ENSMUSG00000038264/ENSMUSG00000033618/ENSMUSG00000051149/ENSMUSG00000062991/ENSMUSG00000023951/ENSMUSG00000029674/ENSMUSG00000000627/ENSMUSG00000029291/ENSMUSG00000006057/ENSMUSG00000018736/ENSMUSG00000015291/ENSMUSG00000015222/ENSMUSG00000038777/ENSMUSG00000000305/ENSMUSG00000026833/ENSMUSG00000052727/ENSMUSG00000042766/ENSMUSG00000050272	21
463	Down	GO:1902903	regulation of supramolecular fiber organization	47/1598	352/21087	0.00010615	0.001806848	0.001544531	ENSMUSG00000019997/ENSMUSG00000020135/ENSMUSG00000022623/ENSMUSG00000028991/ENSMUSG00000026697/ENSMUSG00000074238/ENSMUSG00000027254/ENSMUSG00000050357/ENSMUSG00000045038/ENSMUSG00000027805/ENSMUSG00000030043/ENSMUSG00000090100/ENSMUSG00000022099/ENSMUSG00000058230/ENSMUSG00000032827/ENSMUSG00000038738/ENSMUSG00000029674/ENSMUSG00000046442/ENSMUSG00000030000/ENSMUSG00000041729/ENSMUSG00000033788/…	47
464	Down	GO:0072507	divalent inorganic cation homeostasis	64/1598	525/21087	0.00010903	0.001851867	0.001583014	ENSMUSG00000032336/ENSMUSG00000033208/ENSMUSG00000027584/ENSMUSG00000034997/ENSMUSG00000030209/ENSMUSG00000003657/ENSMUSG00000020734/ENSMUSG00000020886/ENSMUSG00000039953/ENSMUSG00000022840/ENSMUSG00000021313/ENSMUSG00000030666/ENSMUSG00000078566/ENSMUSG00000018634/ENSMUSG00000019828/ENSMUSG00000030669/ENSMUSG00000032011/ENSMUSG00000061603/ENSMUSG00000049551/ENSMUSG00000045038/ENSMUSG00000021194/…	64
465	Down	GO:1901880	negative regulation of protein depolymerization	16/1598	74/21087	0.000109375	0.001853726	0.001584604	ENSMUSG00000020135/ENSMUSG00000027254/ENSMUSG00000050357/ENSMUSG00000090100/ENSMUSG00000022099/ENSMUSG00000030000/ENSMUSG00000033788/ENSMUSG00000064302/ENSMUSG00000015222/ENSMUSG00000021061/ENSMUSG00000044117/ENSMUSG00000044433/ENSMUSG00000027500/ENSMUSG00000057738/ENSMUSG00000052727/ENSMUSG00000021262	16
466	Down	GO:0051656	establishment of organelle localization	75/1598	641/21087	0.000111124	0.001876347	0.00160394	ENSMUSG00000026797/ENSMUSG00000026825/ENSMUSG00000006435/ENSMUSG00000031840/ENSMUSG00000029223/ENSMUSG00000024948/ENSMUSG00000018634/ENSMUSG00000033862/ENSMUSG00000074238/ENSMUSG00000024065/ENSMUSG00000024873/ENSMUSG00000021194/ENSMUSG00000057531/ENSMUSG00000025867/ENSMUSG00000040687/ENSMUSG00000006930/ENSMUSG00000029053/ENSMUSG00000090100/ENSMUSG00000058230/ENSMUSG00000041794/ENSMUSG00000036825/…	75
467	Down	GO:0003016	respiratory system process	10/1598	33/21087	0.000111424	0.001876347	0.00160394	ENSMUSG00000042429/ENSMUSG00000031840/ENSMUSG00000002799/ENSMUSG00000000263/ENSMUSG00000051790/ENSMUSG00000025579/ENSMUSG00000026103/ENSMUSG00000033585/ENSMUSG00000038718/ENSMUSG00000055932	10
468	Down	GO:0007026	negative regulation of microtubule depolymerization	10/1598	33/21087	0.000111424	0.001876347	0.00160394	ENSMUSG00000020135/ENSMUSG00000027254/ENSMUSG00000090100/ENSMUSG00000033788/ENSMUSG00000064302/ENSMUSG00000015222/ENSMUSG00000044117/ENSMUSG00000044433/ENSMUSG00000027500/ENSMUSG00000052727	10
469	Down	GO:0021626	central nervous system maturation	5/1598	8/21087	0.000114528	0.00192451	0.001645111	ENSMUSG00000048895/ENSMUSG00000026959/ENSMUSG00000034656/ENSMUSG00000090071/ENSMUSG00000060240	5
470	Down	GO:0010807	regulation of synaptic vesicle priming	6/1598	12/21087	0.000116288	0.001949934	0.001666844	ENSMUSG00000026797/ENSMUSG00000041670/ENSMUSG00000031840/ENSMUSG00000027438/ENSMUSG00000030806/ENSMUSG00000006024	6
471	Down	GO:0032091	negative regulation of protein binding	20/1598	106/21087	0.000122604	0.002051471	0.00175364	ENSMUSG00000022812/ENSMUSG00000022855/ENSMUSG00000039615/ENSMUSG00000051149/ENSMUSG00000028988/ENSMUSG00000057531/ENSMUSG00000054452/ENSMUSG00000090100/ENSMUSG00000031155/ENSMUSG00000025266/ENSMUSG00000028975/ENSMUSG00000042401/ENSMUSG00000033788/ENSMUSG00000015599/ENSMUSG00000015222/ENSMUSG00000029121/ENSMUSG00000020681/ENSMUSG00000023118/ENSMUSG00000029145/ENSMUSG00000000308	20
472	Down	GO:0070588	calcium ion transmembrane transport	40/1598	286/21087	0.000125097	0.002088752	0.001785509	ENSMUSG00000027584/ENSMUSG00000034997/ENSMUSG00000030209/ENSMUSG00000020734/ENSMUSG00000023017/ENSMUSG00000021313/ENSMUSG00000018634/ENSMUSG00000032011/ENSMUSG00000024065/ENSMUSG00000061603/ENSMUSG00000045038/ENSMUSG00000020635/ENSMUSG00000025318/ENSMUSG00000079055/ENSMUSG00000006930/ENSMUSG00000009292/ENSMUSG00000004035/ENSMUSG00000028854/ENSMUSG00000026959/ENSMUSG00000002771/ENSMUSG00000009647/…	40
473	Down	GO:0097435	supramolecular fiber organization	79/1598	687/21087	0.000130209	0.002169505	0.001854538	ENSMUSG00000019997/ENSMUSG00000020135/ENSMUSG00000022623/ENSMUSG00000028991/ENSMUSG00000026697/ENSMUSG00000074238/ENSMUSG00000027254/ENSMUSG00000030685/ENSMUSG00000050357/ENSMUSG00000027581/ENSMUSG00000045038/ENSMUSG00000027805/ENSMUSG00000030043/ENSMUSG00000038976/ENSMUSG00000032232/ENSMUSG00000090100/ENSMUSG00000022099/ENSMUSG00000058230/ENSMUSG00000032827/ENSMUSG00000038738/ENSMUSG00000029674/…	79
474	Down	GO:0051260	protein homooligomerization	50/1598	385/21087	0.000130767	0.002169782	0.001854775	ENSMUSG00000027895/ENSMUSG00000003575/ENSMUSG00000017314/ENSMUSG00000024065/ENSMUSG00000030685/ENSMUSG00000000263/ENSMUSG00000030310/ENSMUSG00000037653/ENSMUSG00000022454/ENSMUSG00000050556/ENSMUSG00000009292/ENSMUSG00000040724/ENSMUSG00000006818/ENSMUSG00000026932/ENSMUSG00000062785/ENSMUSG00000022602/ENSMUSG00000033249/ENSMUSG00000030499/ENSMUSG00000024501/ENSMUSG00000028975/ENSMUSG00000043673/…	50
475	Down	GO:0015893	drug transport	31/1598	202/21087	0.000130776	0.002169782	0.001854775	ENSMUSG00000023064/ENSMUSG00000028542/ENSMUSG00000034997/ENSMUSG00000027577/ENSMUSG00000030731/ENSMUSG00000024743/ENSMUSG00000090223/ENSMUSG00000028756/ENSMUSG00000048142/ENSMUSG00000057531/ENSMUSG00000040724/ENSMUSG00000024462/ENSMUSG00000027220/ENSMUSG00000027030/ENSMUSG00000057880/ENSMUSG00000026452/ENSMUSG00000003411/ENSMUSG00000034656/ENSMUSG00000030495/ENSMUSG00000100241/ENSMUSG00000020261/…	31
476	Down	GO:0060996	dendritic spine development	22/1598	123/21087	0.0001311	0.002170585	0.001855461	ENSMUSG00000048895/ENSMUSG00000057897/ENSMUSG00000032537/ENSMUSG00000006435/ENSMUSG00000035863/ENSMUSG00000020886/ENSMUSG00000022623/ENSMUSG00000028991/ENSMUSG00000042700/ENSMUSG00000011877/ENSMUSG00000042589/ENSMUSG00000051790/ENSMUSG00000057531/ENSMUSG00000033389/ENSMUSG00000025920/ENSMUSG00000032827/ENSMUSG00000022602/ENSMUSG00000062991/ENSMUSG00000038738/ENSMUSG00000017740/ENSMUSG00000040265/…	22
477	Down	GO:0021696	cerebellar cortex morphogenesis	11/1598	40/21087	0.000135317	0.002231039	0.001907138	ENSMUSG00000025407/ENSMUSG00000031654/ENSMUSG00000029512/ENSMUSG00000023011/ENSMUSG00000030302/ENSMUSG00000034656/ENSMUSG00000039137/ENSMUSG00000067889/ENSMUSG00000066129/ENSMUSG00000060240/ENSMUSG00000056596	11
478	Down	GO:0099590	neurotransmitter receptor internalization	11/1598	40/21087	0.000135317	0.002231039	0.001907138	ENSMUSG00000019146/ENSMUSG00000026825/ENSMUSG00000027273/ENSMUSG00000006930/ENSMUSG00000022602/ENSMUSG00000028785/ENSMUSG00000040276/ENSMUSG00000034902/ENSMUSG00000022841/ENSMUSG00000040265/ENSMUSG00000025468	11
479	Down	GO:0014051	gamma-aminobutyric acid secretion	7/1598	17/21087	0.00013975	0.002277215	0.00194661	ENSMUSG00000030310/ENSMUSG00000024897/ENSMUSG00000024462/ENSMUSG00000057880/ENSMUSG00000039059/ENSMUSG00000034656/ENSMUSG00000038486	7
480	Down	GO:1904889	regulation of excitatory synapse assembly	7/1598	17/21087	0.00013975	0.002277215	0.00194661	ENSMUSG00000060780/ENSMUSG00000059146/ENSMUSG00000042700/ENSMUSG00000031654/ENSMUSG00000025582/ENSMUSG00000030600/ENSMUSG00000047085	7
481	Down	GO:0001963	synaptic transmission, dopaminergic	15/1598	68/21087	0.000140141	0.002277215	0.00194661	ENSMUSG00000024524/ENSMUSG00000031748/ENSMUSG00000035863/ENSMUSG00000022840/ENSMUSG00000028756/ENSMUSG00000055471/ENSMUSG00000026179/ENSMUSG00000029126/ENSMUSG00000048142/ENSMUSG00000057531/ENSMUSG00000034472/ENSMUSG00000028631/ENSMUSG00000003411/ENSMUSG00000025468/ENSMUSG00000020297	15
482	Down	GO:0008542	visual learning	15/1598	68/21087	0.000140141	0.002277215	0.00194661	ENSMUSG00000021684/ENSMUSG00000018634/ENSMUSG00000028991/ENSMUSG00000040136/ENSMUSG00000036564/ENSMUSG00000026959/ENSMUSG00000050541/ENSMUSG00000051331/ENSMUSG00000032532/ENSMUSG00000027210/ENSMUSG00000037032/ENSMUSG00000040907/ENSMUSG00000031367/ENSMUSG00000022489/ENSMUSG00000028541	15
483	Down	GO:0043113	receptor clustering	15/1598	68/21087	0.000140141	0.002277215	0.00194661	ENSMUSG00000030209/ENSMUSG00000020886/ENSMUSG00000022623/ENSMUSG00000032011/ENSMUSG00000030098/ENSMUSG00000049551/ENSMUSG00000025656/ENSMUSG00000003378/ENSMUSG00000034656/ENSMUSG00000044716/ENSMUSG00000042873/ENSMUSG00000052572/ENSMUSG00000033768/ENSMUSG00000028136/ENSMUSG00000028020	15
484	Down	GO:0071868	cellular response to monoamine stimulus	15/1598	68/21087	0.000140141	0.002277215	0.00194661	ENSMUSG00000024524/ENSMUSG00000031748/ENSMUSG00000034997/ENSMUSG00000035863/ENSMUSG00000022840/ENSMUSG00000021313/ENSMUSG00000055471/ENSMUSG00000061603/ENSMUSG00000029126/ENSMUSG00000057531/ENSMUSG00000028854/ENSMUSG00000029361/ENSMUSG00000006651/ENSMUSG00000025468/ENSMUSG00000020297	15
485	Down	GO:0071870	cellular response to catecholamine stimulus	15/1598	68/21087	0.000140141	0.002277215	0.00194661	ENSMUSG00000024524/ENSMUSG00000031748/ENSMUSG00000034997/ENSMUSG00000035863/ENSMUSG00000022840/ENSMUSG00000021313/ENSMUSG00000055471/ENSMUSG00000061603/ENSMUSG00000029126/ENSMUSG00000057531/ENSMUSG00000028854/ENSMUSG00000029361/ENSMUSG00000006651/ENSMUSG00000025468/ENSMUSG00000020297	15
486	Down	GO:1902652	secondary alcohol metabolic process	24/1598	141/21087	0.000147824	0.002397123	0.00204911	ENSMUSG00000036585/ENSMUSG00000035953/ENSMUSG00000021259/ENSMUSG00000045294/ENSMUSG00000022351/ENSMUSG00000032193/ENSMUSG00000059743/ENSMUSG00000034926/ENSMUSG00000028467/ENSMUSG00000026944/ENSMUSG00000027952/ENSMUSG00000006517/ENSMUSG00000041939/ENSMUSG00000093930/ENSMUSG00000022463/ENSMUSG00000003271/ENSMUSG00000001467/ENSMUSG00000027406/ENSMUSG00000021252/ENSMUSG00000022477/ENSMUSG00000032279/…	24
487	Down	GO:0032272	negative regulation of protein polymerization	16/1598	76/21087	0.000152496	0.002467803	0.00210953	ENSMUSG00000050357/ENSMUSG00000027805/ENSMUSG00000022099/ENSMUSG00000030000/ENSMUSG00000062591/ENSMUSG00000030357/ENSMUSG00000034295/ENSMUSG00000034570/ENSMUSG00000015222/ENSMUSG00000021061/ENSMUSG00000040811/ENSMUSG00000035407/ENSMUSG00000027500/ENSMUSG00000057738/ENSMUSG00000013921/ENSMUSG00000021262	16
488	Down	GO:1901608	regulation of vesicle transport along microtubule	4/1598	5/21087	0.000154388	0.002493303	0.002131327	ENSMUSG00000024873/ENSMUSG00000015222/ENSMUSG00000042766/ENSMUSG00000042992	4
489	Down	GO:0072503	cellular divalent inorganic cation homeostasis	61/1598	501/21087	0.000161741	0.002606709	0.002228268	ENSMUSG00000032336/ENSMUSG00000033208/ENSMUSG00000027584/ENSMUSG00000034997/ENSMUSG00000030209/ENSMUSG00000003657/ENSMUSG00000020734/ENSMUSG00000020886/ENSMUSG00000039953/ENSMUSG00000022840/ENSMUSG00000021313/ENSMUSG00000030666/ENSMUSG00000078566/ENSMUSG00000018634/ENSMUSG00000019828/ENSMUSG00000030669/ENSMUSG00000032011/ENSMUSG00000061603/ENSMUSG00000049551/ENSMUSG00000045038/ENSMUSG00000021194/…	61
490	Down	GO:0051650	establishment of vesicle localization	54/1598	429/21087	0.000162733	0.002615365	0.002235669	ENSMUSG00000026825/ENSMUSG00000006435/ENSMUSG00000031840/ENSMUSG00000024948/ENSMUSG00000033862/ENSMUSG00000074238/ENSMUSG00000024065/ENSMUSG00000024873/ENSMUSG00000057531/ENSMUSG00000040687/ENSMUSG00000006930/ENSMUSG00000029053/ENSMUSG00000090100/ENSMUSG00000058230/ENSMUSG00000041794/ENSMUSG00000036825/ENSMUSG00000030397/ENSMUSG00000047766/ENSMUSG00000023473/ENSMUSG00000047388/ENSMUSG00000031865/…	54
491	Down	GO:0010771	negative regulation of cell morphogenesis involved in differentiation	19/1598	100/21087	0.000163036	0.002615365	0.002235669	ENSMUSG00000048895/ENSMUSG00000022812/ENSMUSG00000038264/ENSMUSG00000032011/ENSMUSG00000074238/ENSMUSG00000028161/ENSMUSG00000057531/ENSMUSG00000029512/ENSMUSG00000022099/ENSMUSG00000028519/ENSMUSG00000029516/ENSMUSG00000000627/ENSMUSG00000029291/ENSMUSG00000015291/ENSMUSG00000015222/ENSMUSG00000038777/ENSMUSG00000040265/ENSMUSG00000042766/ENSMUSG00000040785	19
492	Down	GO:0046888	negative regulation of hormone secretion	18/1598	92/21087	0.000163274	0.002615365	0.002235669	ENSMUSG00000042429/ENSMUSG00000021684/ENSMUSG00000051343/ENSMUSG00000054459/ENSMUSG00000028445/ENSMUSG00000096146/ENSMUSG00000028161/ENSMUSG00000021647/ENSMUSG00000037098/ENSMUSG00000021194/ENSMUSG00000020635/ENSMUSG00000031548/ENSMUSG00000040687/ENSMUSG00000040136/ENSMUSG00000050556/ENSMUSG00000028963/ENSMUSG00000029361/ENSMUSG00000068742	18
493	Down	GO:0071867	response to monoamine	15/1598	69/21087	0.000166676	0.002659059	0.002273018	ENSMUSG00000024524/ENSMUSG00000031748/ENSMUSG00000034997/ENSMUSG00000035863/ENSMUSG00000022840/ENSMUSG00000021313/ENSMUSG00000055471/ENSMUSG00000061603/ENSMUSG00000029126/ENSMUSG00000057531/ENSMUSG00000028854/ENSMUSG00000029361/ENSMUSG00000006651/ENSMUSG00000025468/ENSMUSG00000020297	15
494	Down	GO:0071869	response to catecholamine	15/1598	69/21087	0.000166676	0.002659059	0.002273018	ENSMUSG00000024524/ENSMUSG00000031748/ENSMUSG00000034997/ENSMUSG00000035863/ENSMUSG00000022840/ENSMUSG00000021313/ENSMUSG00000055471/ENSMUSG00000061603/ENSMUSG00000029126/ENSMUSG00000057531/ENSMUSG00000028854/ENSMUSG00000029361/ENSMUSG00000006651/ENSMUSG00000025468/ENSMUSG00000020297	15
495	Down	GO:1903307	positive regulation of regulated secretory pathway	14/1598	62/21087	0.000178171	0.002836696	0.002424866	ENSMUSG00000026797/ENSMUSG00000041670/ENSMUSG00000031840/ENSMUSG00000024743/ENSMUSG00000018634/ENSMUSG00000040722/ENSMUSG00000030805/ENSMUSG00000050556/ENSMUSG00000045114/ENSMUSG00000026452/ENSMUSG00000090071/ENSMUSG00000020866/ENSMUSG00000022416/ENSMUSG00000054423	14
496	Down	GO:0021575	hindbrain morphogenesis	13/1598	55/21087	0.00018485	0.002936935	0.002510553	ENSMUSG00000025407/ENSMUSG00000031654/ENSMUSG00000029512/ENSMUSG00000023011/ENSMUSG00000024039/ENSMUSG00000028519/ENSMUSG00000030302/ENSMUSG00000034656/ENSMUSG00000039137/ENSMUSG00000067889/ENSMUSG00000066129/ENSMUSG00000060240/ENSMUSG00000056596	13
497	Down	GO:0046883	regulation of hormone secretion	41/1598	301/21087	0.000185212	0.002936935	0.002510553	ENSMUSG00000042429/ENSMUSG00000047507/ENSMUSG00000021684/ENSMUSG00000021816/ENSMUSG00000022840/ENSMUSG00000024743/ENSMUSG00000018634/ENSMUSG00000037010/ENSMUSG00000053046/ENSMUSG00000051343/ENSMUSG00000054459/ENSMUSG00000028445/ENSMUSG00000096146/ENSMUSG00000028161/ENSMUSG00000027273/ENSMUSG00000021647/ENSMUSG00000051790/ENSMUSG00000045038/ENSMUSG00000037098/ENSMUSG00000021194/ENSMUSG00000030805/…	41
498	Down	GO:0043576	regulation of respiratory gaseous exchange	8/1598	23/21087	0.000186536	0.002951989	0.002523421	ENSMUSG00000042429/ENSMUSG00000037010/ENSMUSG00000000263/ENSMUSG00000051790/ENSMUSG00000026959/ENSMUSG00000026103/ENSMUSG00000038718/ENSMUSG00000055932	8
499	Down	GO:0060998	regulation of dendritic spine development	18/1598	93/21087	0.000188329	0.002974383	0.002542564	ENSMUSG00000048895/ENSMUSG00000057897/ENSMUSG00000006435/ENSMUSG00000035863/ENSMUSG00000022623/ENSMUSG00000028991/ENSMUSG00000042700/ENSMUSG00000042589/ENSMUSG00000051790/ENSMUSG00000057531/ENSMUSG00000033389/ENSMUSG00000025920/ENSMUSG00000032827/ENSMUSG00000022602/ENSMUSG00000062991/ENSMUSG00000038738/ENSMUSG00000040265/ENSMUSG00000042688	18
500	Down	GO:0032228	regulation of synaptic transmission, GABAergic	10/1598	35/21087	0.000192184	0.003023152	0.002584253	ENSMUSG00000042429/ENSMUSG00000026797/ENSMUSG00000036062/ENSMUSG00000031883/ENSMUSG00000030310/ENSMUSG00000051790/ENSMUSG00000045038/ENSMUSG00000006930/ENSMUSG00000030043/ENSMUSG00000030898	10
501	Down	GO:0060292	long-term synaptic depression	10/1598	35/21087	0.000192184	0.003023152	0.002584253	ENSMUSG00000042429/ENSMUSG00000026797/ENSMUSG00000022623/ENSMUSG00000031654/ENSMUSG00000050556/ENSMUSG00000063434/ENSMUSG00000041115/ENSMUSG00000025920/ENSMUSG00000032827/ENSMUSG00000022602	10
502	Down	GO:0050790	regulation of catalytic activity	196/1598	2033/21087	0.000198384	0.003114477	0.002662319	ENSMUSG00000017737/ENSMUSG00000036585/ENSMUSG00000024277/ENSMUSG00000042429/ENSMUSG00000024524/ENSMUSG00000027223/ENSMUSG00000027584/ENSMUSG00000031748/ENSMUSG00000034997/ENSMUSG00000048895/ENSMUSG00000000296/ENSMUSG00000030209/ENSMUSG00000057897/ENSMUSG00000025151/ENSMUSG00000020366/ENSMUSG00000032601/ENSMUSG00000040133/ENSMUSG00000059146/ENSMUSG00000006435/ENSMUSG00000019997/ENSMUSG00000059981/…	196
503	Down	GO:0008610	lipid biosynthetic process	65/1598	547/21087	0.000201655	0.003159524	0.002700827	ENSMUSG00000020891/ENSMUSG00000036585/ENSMUSG00000021684/ENSMUSG00000034997/ENSMUSG00000029167/ENSMUSG00000020366/ENSMUSG00000028991/ENSMUSG00000028445/ENSMUSG00000045294/ENSMUSG00000056124/ENSMUSG00000033579/ENSMUSG00000032883/ENSMUSG00000024735/ENSMUSG00000022351/ENSMUSG00000048486/ENSMUSG00000020593/ENSMUSG00000020333/ENSMUSG00000030869/ENSMUSG00000034902/ENSMUSG00000032193/ENSMUSG00000059743/…	65
504	Down	GO:0097061	dendritic spine organization	18/1598	94/21087	0.00021668	0.00338821	0.002896312	ENSMUSG00000048895/ENSMUSG00000030209/ENSMUSG00000057897/ENSMUSG00000032537/ENSMUSG00000020886/ENSMUSG00000022623/ENSMUSG00000042700/ENSMUSG00000029608/ENSMUSG00000042589/ENSMUSG00000001507/ENSMUSG00000057531/ENSMUSG00000033389/ENSMUSG00000025920/ENSMUSG00000026959/ENSMUSG00000032827/ENSMUSG00000022602/ENSMUSG00000038738/ENSMUSG00000040265	18
505	Down	GO:0009966	regulation of signal transduction	270/1598	2925/21087	0.000217579	0.003390526	0.002898292	ENSMUSG00000017737/ENSMUSG00000020099/ENSMUSG00000020891/ENSMUSG00000036585/ENSMUSG00000024277/ENSMUSG00000042429/ENSMUSG00000024524/ENSMUSG00000033208/ENSMUSG00000024186/ENSMUSG00000050148/ENSMUSG00000021708/ENSMUSG00000025407/ENSMUSG00000035953/ENSMUSG00000027223/ENSMUSG00000027584/ENSMUSG00000031748/ENSMUSG00000022619/ENSMUSG00000017897/ENSMUSG00000006575/ENSMUSG00000050132/ENSMUSG00000034997/…	270
506	Down	GO:0010765	positive regulation of sodium ion transport	11/1598	42/21087	0.000217689	0.003390526	0.002898292	ENSMUSG00000019699/ENSMUSG00000028854/ENSMUSG00000029361/ENSMUSG00000037989/ENSMUSG00000069601/ENSMUSG00000019194/ENSMUSG00000038437/ENSMUSG00000029359/ENSMUSG00000026576/ENSMUSG00000046480/ENSMUSG00000049281	11
507	Down	GO:0044281	small molecule metabolic process	168/1598	1708/21087	0.000225166	0.003500064	0.002991927	ENSMUSG00000020891/ENSMUSG00000036585/ENSMUSG00000035953/ENSMUSG00000034997/ENSMUSG00000037012/ENSMUSG00000042249/ENSMUSG00000029167/ENSMUSG00000020366/ENSMUSG00000022840/ENSMUSG00000028991/ENSMUSG00000005580/ENSMUSG00000028756/ENSMUSG00000038967/ENSMUSG00000096146/ENSMUSG00000026179/ENSMUSG00000045038/ENSMUSG00000049422/ENSMUSG00000025190/ENSMUSG00000021259/ENSMUSG00000004035/ENSMUSG00000029361/…	168
508	Down	GO:0006874	cellular calcium ion homeostasis	58/1598	476/21087	0.00022711	0.003523341	0.003011825	ENSMUSG00000032336/ENSMUSG00000033208/ENSMUSG00000027584/ENSMUSG00000034997/ENSMUSG00000030209/ENSMUSG00000003657/ENSMUSG00000020734/ENSMUSG00000020886/ENSMUSG00000039953/ENSMUSG00000022840/ENSMUSG00000021313/ENSMUSG00000030666/ENSMUSG00000078566/ENSMUSG00000018634/ENSMUSG00000019828/ENSMUSG00000030669/ENSMUSG00000032011/ENSMUSG00000061603/ENSMUSG00000049551/ENSMUSG00000045038/ENSMUSG00000021194/…	58
509	Down	GO:1901135	carbohydrate derivative metabolic process	105/1598	986/21087	0.000230565	0.003569907	0.00305163	ENSMUSG00000034997/ENSMUSG00000037012/ENSMUSG00000029167/ENSMUSG00000022840/ENSMUSG00000005580/ENSMUSG00000024962/ENSMUSG00000028756/ENSMUSG00000038967/ENSMUSG00000031837/ENSMUSG00000049422/ENSMUSG00000029361/ENSMUSG00000020431/ENSMUSG00000030302/ENSMUSG00000035011/ENSMUSG00000056124/ENSMUSG00000059734/ENSMUSG00000033579/ENSMUSG00000028785/ENSMUSG00000003072/ENSMUSG00000032294/ENSMUSG00000028982/…	105
510	Down	GO:0007632	visual behavior	15/1598	71/21087	0.000233039	0.003601137	0.003078327	ENSMUSG00000021684/ENSMUSG00000018634/ENSMUSG00000028991/ENSMUSG00000040136/ENSMUSG00000036564/ENSMUSG00000026959/ENSMUSG00000050541/ENSMUSG00000051331/ENSMUSG00000032532/ENSMUSG00000027210/ENSMUSG00000037032/ENSMUSG00000040907/ENSMUSG00000031367/ENSMUSG00000022489/ENSMUSG00000028541	15
511	Down	GO:0099519	dense core granule cytoskeletal transport	5/1598	9/21087	0.000241555	0.003710899	0.003172153	ENSMUSG00000015222/ENSMUSG00000074657/ENSMUSG00000042766/ENSMUSG00000063077/ENSMUSG00000014602	5
512	Down	GO:0099612	protein localization to axon	5/1598	9/21087	0.000241555	0.003710899	0.003172153	ENSMUSG00000017167/ENSMUSG00000069601/ENSMUSG00000039419/ENSMUSG00000042766/ENSMUSG00000024044	5
513	Down	GO:1900454	positive regulation of long-term synaptic depression	5/1598	9/21087	0.000241555	0.003710899	0.003172153	ENSMUSG00000031654/ENSMUSG00000050556/ENSMUSG00000041115/ENSMUSG00000025920/ENSMUSG00000032827	5
514	Down	GO:0008361	regulation of cell size	31/1598	209/21087	0.000244386	0.00374709	0.00320309	ENSMUSG00000048895/ENSMUSG00000059146/ENSMUSG00000022812/ENSMUSG00000038264/ENSMUSG00000022623/ENSMUSG00000019699/ENSMUSG00000028991/ENSMUSG00000033618/ENSMUSG00000038807/ENSMUSG00000051149/ENSMUSG00000030110/ENSMUSG00000029512/ENSMUSG00000062991/ENSMUSG00000030302/ENSMUSG00000023951/ENSMUSG00000029674/ENSMUSG00000000627/ENSMUSG00000029291/ENSMUSG00000017740/ENSMUSG00000006057/ENSMUSG00000018736/…	31
515	Down	GO:0015711	organic anion transport	54/1598	436/21087	0.000245221	0.003752589	0.00320779	ENSMUSG00000042429/ENSMUSG00000028542/ENSMUSG00000026797/ENSMUSG00000030209/ENSMUSG00000020366/ENSMUSG00000030688/ENSMUSG00000029073/ENSMUSG00000030310/ENSMUSG00000057531/ENSMUSG00000024897/ENSMUSG00000024462/ENSMUSG00000027030/ENSMUSG00000057880/ENSMUSG00000039059/ENSMUSG00000034656/ENSMUSG00000003341/ENSMUSG00000038486/ENSMUSG00000032883/ENSMUSG00000021983/ENSMUSG00000031633/ENSMUSG00000032532/…	54
516	Down	GO:0031114	regulation of microtubule depolymerization	10/1598	36/21087	0.000248172	0.003768483	0.003221377	ENSMUSG00000020135/ENSMUSG00000027254/ENSMUSG00000090100/ENSMUSG00000033788/ENSMUSG00000064302/ENSMUSG00000015222/ENSMUSG00000044117/ENSMUSG00000044433/ENSMUSG00000027500/ENSMUSG00000052727	10
517	Down	GO:0048169	regulation of long-term neuronal synaptic plasticity	10/1598	36/21087	0.000248172	0.003768483	0.003221377	ENSMUSG00000033208/ENSMUSG00000030209/ENSMUSG00000057897/ENSMUSG00000041670/ENSMUSG00000006435/ENSMUSG00000020886/ENSMUSG00000025499/ENSMUSG00000022623/ENSMUSG00000031144/ENSMUSG00000026959	10
518	Down	GO:0099633	protein localization to postsynaptic specialization membrane	10/1598	36/21087	0.000248172	0.003768483	0.003221377	ENSMUSG00000019146/ENSMUSG00000020886/ENSMUSG00000022812/ENSMUSG00000025499/ENSMUSG00000011877/ENSMUSG00000025582/ENSMUSG00000059991/ENSMUSG00000041115/ENSMUSG00000029053/ENSMUSG00000052572	10
519	Down	GO:0099645	neurotransmitter receptor localization to postsynaptic specialization membrane	10/1598	36/21087	0.000248172	0.003768483	0.003221377	ENSMUSG00000019146/ENSMUSG00000020886/ENSMUSG00000022812/ENSMUSG00000025499/ENSMUSG00000011877/ENSMUSG00000025582/ENSMUSG00000059991/ENSMUSG00000041115/ENSMUSG00000029053/ENSMUSG00000052572	10
520	Down	GO:0048278	vesicle docking	14/1598	64/21087	0.000254212	0.003852774	0.003293431	ENSMUSG00000072214/ENSMUSG00000026797/ENSMUSG00000041670/ENSMUSG00000031840/ENSMUSG00000034187/ENSMUSG00000030805/ENSMUSG00000003863/ENSMUSG00000034216/ENSMUSG00000050556/ENSMUSG00000030806/ENSMUSG00000036564/ENSMUSG00000020894/ENSMUSG00000003411/ENSMUSG00000033769	14
521	Down	GO:1902683	regulation of receptor localization to synapse	8/1598	24/21087	0.000261306	0.003946715	0.003373734	ENSMUSG00000032336/ENSMUSG00000022812/ENSMUSG00000025499/ENSMUSG00000024873/ENSMUSG00000033389/ENSMUSG00000041115/ENSMUSG00000029053/ENSMUSG00000031153	8
522	Down	GO:0007264	small GTPase mediated signal transduction	59/1598	489/21087	0.000261412	0.003946715	0.003373734	ENSMUSG00000024277/ENSMUSG00000021708/ENSMUSG00000031840/ENSMUSG00000040797/ENSMUSG00000025499/ENSMUSG00000031442/ENSMUSG00000029673/ENSMUSG00000020657/ENSMUSG00000032356/ENSMUSG00000030583/ENSMUSG00000042700/ENSMUSG00000011877/ENSMUSG00000026697/ENSMUSG00000038807/ENSMUSG00000037126/ENSMUSG00000056486/ENSMUSG00000030685/ENSMUSG00000001507/ENSMUSG00000019467/ENSMUSG00000027581/ENSMUSG00000025656/…	59
523	Down	GO:0051590	positive regulation of neurotransmitter transport	12/1598	50/21087	0.000278318	0.004193926	0.003585055	ENSMUSG00000047507/ENSMUSG00000026797/ENSMUSG00000041670/ENSMUSG00000024743/ENSMUSG00000037010/ENSMUSG00000030310/ENSMUSG00000048142/ENSMUSG00000057531/ENSMUSG00000030806/ENSMUSG00000045114/ENSMUSG00000026452/ENSMUSG00000003411	12
524	Down	GO:0006865	amino acid transport	24/1598	147/21087	0.000283421	0.004262677	0.003643825	ENSMUSG00000042429/ENSMUSG00000028542/ENSMUSG00000026797/ENSMUSG00000030209/ENSMUSG00000030310/ENSMUSG00000057531/ENSMUSG00000024897/ENSMUSG00000024462/ENSMUSG00000057880/ENSMUSG00000039059/ENSMUSG00000034656/ENSMUSG00000038486/ENSMUSG00000032532/ENSMUSG00000030495/ENSMUSG00000022462/ENSMUSG00000020261/ENSMUSG00000069072/ENSMUSG00000004902/ENSMUSG00000022756/ENSMUSG00000027894/ENSMUSG00000037771/…	24
525	Down	GO:0010923	negative regulation of phosphatase activity	16/1598	80/21087	0.000284715	0.004273973	0.003653481	ENSMUSG00000020635/ENSMUSG00000038976/ENSMUSG00000036398/ENSMUSG00000068742/ENSMUSG00000039515/ENSMUSG00000052572/ENSMUSG00000044433/ENSMUSG00000048988/ENSMUSG00000060657/ENSMUSG00000069072/ENSMUSG00000035441/ENSMUSG00000038949/ENSMUSG00000043460/ENSMUSG00000051403/ENSMUSG00000029420/ENSMUSG00000062044	16
526	Down	GO:0051402	neuron apoptotic process	40/1598	298/21087	0.000299835	0.004492398	0.003840195	ENSMUSG00000020099/ENSMUSG00000048895/ENSMUSG00000026797/ENSMUSG00000029167/ENSMUSG00000022812/ENSMUSG00000025499/ENSMUSG00000078566/ENSMUSG00000024962/ENSMUSG00000006476/ENSMUSG00000090223/ENSMUSG00000028756/ENSMUSG00000051149/ENSMUSG00000049551/ENSMUSG00000057177/ENSMUSG00000050556/ENSMUSG00000003378/ENSMUSG00000033352/ENSMUSG00000006818/ENSMUSG00000023011/ENSMUSG00000029361/ENSMUSG00000026959/…	40
527	Down	GO:0006839	mitochondrial transport	28/1598	184/21087	0.000311609	0.004659951	0.003983422	ENSMUSG00000017897/ENSMUSG00000022812/ENSMUSG00000078566/ENSMUSG00000025582/ENSMUSG00000028756/ENSMUSG00000030854/ENSMUSG00000049422/ENSMUSG00000057177/ENSMUSG00000024847/ENSMUSG00000028854/ENSMUSG00000054428/ENSMUSG00000028086/ENSMUSG00000009647/ENSMUSG00000024500/ENSMUSG00000002984/ENSMUSG00000028982/ENSMUSG00000031633/ENSMUSG00000022437/ENSMUSG00000025393/ENSMUSG00000025733/ENSMUSG00000018322/…	28
528	Down	GO:0045956	positive regulation of calcium ion-dependent exocytosis	7/1598	19/21087	0.000316375	0.004713328	0.00402905	ENSMUSG00000026797/ENSMUSG00000040722/ENSMUSG00000050556/ENSMUSG00000090071/ENSMUSG00000020866/ENSMUSG00000022416/ENSMUSG00000054423	7
529	Down	GO:1905874	regulation of postsynaptic density organization	7/1598	19/21087	0.000316375	0.004713328	0.00402905	ENSMUSG00000060780/ENSMUSG00000059146/ENSMUSG00000042700/ENSMUSG00000031654/ENSMUSG00000025582/ENSMUSG00000030600/ENSMUSG00000047085	7
530	Down	GO:1901385	regulation of voltage-gated calcium channel activity	10/1598	37/21087	0.000317192	0.004716578	0.004031829	ENSMUSG00000027584/ENSMUSG00000018634/ENSMUSG00000024065/ENSMUSG00000034656/ENSMUSG00000033788/ENSMUSG00000028785/ENSMUSG00000020882/ENSMUSG00000035640/ENSMUSG00000017400/ENSMUSG00000038473	10
531	Down	GO:0051056	regulation of small GTPase mediated signal transduction	36/1598	260/21087	0.000323485	0.004801095	0.004104076	ENSMUSG00000024277/ENSMUSG00000021708/ENSMUSG00000040797/ENSMUSG00000025499/ENSMUSG00000031442/ENSMUSG00000029673/ENSMUSG00000032356/ENSMUSG00000030583/ENSMUSG00000042700/ENSMUSG00000011877/ENSMUSG00000026697/ENSMUSG00000038807/ENSMUSG00000037126/ENSMUSG00000056486/ENSMUSG00000030685/ENSMUSG00000001507/ENSMUSG00000019467/ENSMUSG00000027581/ENSMUSG00000025656/ENSMUSG00000040687/ENSMUSG00000041351/…	36
532	Down	GO:2001259	positive regulation of cation channel activity	16/1598	81/21087	0.000330207	0.004876285	0.004168349	ENSMUSG00000019146/ENSMUSG00000022623/ENSMUSG00000028756/ENSMUSG00000024065/ENSMUSG00000061603/ENSMUSG00000096146/ENSMUSG00000040136/ENSMUSG00000006930/ENSMUSG00000004035/ENSMUSG00000022602/ENSMUSG00000069601/ENSMUSG00000052374/ENSMUSG00000047976/ENSMUSG00000050947/ENSMUSG00000058975/ENSMUSG00000017400	16
533	Down	GO:0016081	synaptic vesicle docking	6/1598	14/21087	0.000331026	0.004876285	0.004168349	ENSMUSG00000072214/ENSMUSG00000041670/ENSMUSG00000030805/ENSMUSG00000003863/ENSMUSG00000030806/ENSMUSG00000020894	6
534	Down	GO:0061669	spontaneous neurotransmitter secretion	6/1598	14/21087	0.000331026	0.004876285	0.004168349	ENSMUSG00000041670/ENSMUSG00000029608/ENSMUSG00000029126/ENSMUSG00000030806/ENSMUSG00000032827/ENSMUSG00000052301	6
535	Down	GO:0098814	spontaneous synaptic transmission	6/1598	14/21087	0.000331026	0.004876285	0.004168349	ENSMUSG00000041670/ENSMUSG00000029608/ENSMUSG00000029126/ENSMUSG00000030806/ENSMUSG00000032827/ENSMUSG00000052301	6
536	Down	GO:0008038	neuron recognition	12/1598	51/21087	0.000339141	0.004986514	0.004262576	ENSMUSG00000032336/ENSMUSG00000048895/ENSMUSG00000022883/ENSMUSG00000058230/ENSMUSG00000039103/ENSMUSG00000042401/ENSMUSG00000023473/ENSMUSG00000039419/ENSMUSG00000033585/ENSMUSG00000050947/ENSMUSG00000050272/ENSMUSG00000037843	12
537	Down	GO:0090276	regulation of peptide hormone secretion	33/1598	232/21087	0.000344532	0.00505635	0.004322273	ENSMUSG00000047507/ENSMUSG00000021684/ENSMUSG00000021816/ENSMUSG00000022840/ENSMUSG00000024743/ENSMUSG00000037010/ENSMUSG00000053046/ENSMUSG00000054459/ENSMUSG00000028445/ENSMUSG00000096146/ENSMUSG00000028161/ENSMUSG00000021647/ENSMUSG00000051790/ENSMUSG00000045038/ENSMUSG00000021194/ENSMUSG00000030805/ENSMUSG00000020635/ENSMUSG00000031548/ENSMUSG00000040687/ENSMUSG00000040136/ENSMUSG00000050556/…	33
538	Down	GO:0051017	actin filament bundle assembly	26/1598	167/21087	0.000349902	0.005107981	0.004366408	ENSMUSG00000019997/ENSMUSG00000022623/ENSMUSG00000028991/ENSMUSG00000026697/ENSMUSG00000030685/ENSMUSG00000027805/ENSMUSG00000030043/ENSMUSG00000022099/ENSMUSG00000032827/ENSMUSG00000038738/ENSMUSG00000029674/ENSMUSG00000046442/ENSMUSG00000054855/ENSMUSG00000024501/ENSMUSG00000030000/ENSMUSG00000041729/ENSMUSG00000010154/ENSMUSG00000054728/ENSMUSG00000029449/ENSMUSG00000064302/ENSMUSG00000026181/…	26
539	Down	GO:0002026	regulation of the force of heart contraction	9/1598	31/21087	0.000351291	0.005107981	0.004366408	ENSMUSG00000021313/ENSMUSG00000037010/ENSMUSG00000024858/ENSMUSG00000021194/ENSMUSG00000028854/ENSMUSG00000029361/ENSMUSG00000050541/ENSMUSG00000025579/ENSMUSG00000053093	9
540	Down	GO:0060632	regulation of microtubule-based movement	9/1598	31/21087	0.000351291	0.005107981	0.004366408	ENSMUSG00000024873/ENSMUSG00000006930/ENSMUSG00000020396/ENSMUSG00000015222/ENSMUSG00000032118/ENSMUSG00000042766/ENSMUSG00000031796/ENSMUSG00000018395/ENSMUSG00000042992	9
541	Down	GO:0098884	postsynaptic neurotransmitter receptor internalization	9/1598	31/21087	0.000351291	0.005107981	0.004366408	ENSMUSG00000026825/ENSMUSG00000006930/ENSMUSG00000022602/ENSMUSG00000028785/ENSMUSG00000040276/ENSMUSG00000034902/ENSMUSG00000022841/ENSMUSG00000040265/ENSMUSG00000025468	9
542	Down	GO:0140239	postsynaptic endocytosis	9/1598	31/21087	0.000351291	0.005107981	0.004366408	ENSMUSG00000026825/ENSMUSG00000006930/ENSMUSG00000022602/ENSMUSG00000028785/ENSMUSG00000040276/ENSMUSG00000034902/ENSMUSG00000022841/ENSMUSG00000040265/ENSMUSG00000025468	9
543	Down	GO:0023056	positive regulation of signaling	189/1598	1972/21087	0.000352107	0.00511042	0.004368493	ENSMUSG00000017737/ENSMUSG00000020099/ENSMUSG00000020891/ENSMUSG00000036585/ENSMUSG00000024277/ENSMUSG00000042429/ENSMUSG00000047507/ENSMUSG00000033208/ENSMUSG00000050148/ENSMUSG00000021708/ENSMUSG00000025407/ENSMUSG00000035953/ENSMUSG00000027223/ENSMUSG00000022619/ENSMUSG00000006575/ENSMUSG00000034997/ENSMUSG00000000296/ENSMUSG00000026797/ENSMUSG00000037012/ENSMUSG00000019428/ENSMUSG00000030209/…	189
544	Down	GO:0010038	response to metal ion	37/1598	271/21087	0.000355564	0.005151105	0.004403271	ENSMUSG00000017737/ENSMUSG00000057897/ENSMUSG00000020366/ENSMUSG00000020886/ENSMUSG00000022812/ENSMUSG00000030731/ENSMUSG00000021313/ENSMUSG00000024743/ENSMUSG00000078566/ENSMUSG00000025582/ENSMUSG00000000263/ENSMUSG00000028161/ENSMUSG00000057177/ENSMUSG00000040136/ENSMUSG00000009292/ENSMUSG00000027220/ENSMUSG00000022099/ENSMUSG00000057880/ENSMUSG00000026452/ENSMUSG00000069601/ENSMUSG00000028785/…	37
545	Down	GO:0001956	positive regulation of neurotransmitter secretion	8/1598	25/21087	0.000358895	0.005189818	0.004436364	ENSMUSG00000047507/ENSMUSG00000026797/ENSMUSG00000041670/ENSMUSG00000024743/ENSMUSG00000057531/ENSMUSG00000030806/ENSMUSG00000045114/ENSMUSG00000026452	8
546	Down	GO:0016125	sterol metabolic process	22/1598	132/21087	0.00037159	0.005363562	0.004584884	ENSMUSG00000036585/ENSMUSG00000035953/ENSMUSG00000021259/ENSMUSG00000045294/ENSMUSG00000022351/ENSMUSG00000032193/ENSMUSG00000059743/ENSMUSG00000034926/ENSMUSG00000028467/ENSMUSG00000026944/ENSMUSG00000027952/ENSMUSG00000006517/ENSMUSG00000041939/ENSMUSG00000093930/ENSMUSG00000022463/ENSMUSG00000003271/ENSMUSG00000001467/ENSMUSG00000021252/ENSMUSG00000032018/ENSMUSG00000031604/ENSMUSG00000024799/…	22
547	Down	GO:0048589	developmental growth	86/1598	788/21087	0.000385005	0.005547026	0.004741713	ENSMUSG00000036585/ENSMUSG00000025407/ENSMUSG00000048895/ENSMUSG00000019428/ENSMUSG00000041670/ENSMUSG00000059146/ENSMUSG00000022812/ENSMUSG00000030731/ENSMUSG00000038264/ENSMUSG00000022623/ENSMUSG00000029673/ENSMUSG00000028991/ENSMUSG00000040856/ENSMUSG00000061393/ENSMUSG00000021974/ENSMUSG00000033618/ENSMUSG00000020340/ENSMUSG00000042793/ENSMUSG00000051149/ENSMUSG00000061603/ENSMUSG00000042817/…	86
548	Down	GO:0050796	regulation of insulin secretion	28/1598	187/21087	0.000407817	0.005864969	0.005013497	ENSMUSG00000047507/ENSMUSG00000021684/ENSMUSG00000021816/ENSMUSG00000022840/ENSMUSG00000024743/ENSMUSG00000053046/ENSMUSG00000054459/ENSMUSG00000028445/ENSMUSG00000096146/ENSMUSG00000028161/ENSMUSG00000021647/ENSMUSG00000051790/ENSMUSG00000045038/ENSMUSG00000021194/ENSMUSG00000030805/ENSMUSG00000020635/ENSMUSG00000031548/ENSMUSG00000040136/ENSMUSG00000050556/ENSMUSG00000009292/ENSMUSG00000028963/…	28
549	Down	GO:0010647	positive regulation of cell communication	188/1598	1966/21087	0.000409334	0.005876063	0.00502298	ENSMUSG00000017737/ENSMUSG00000020099/ENSMUSG00000020891/ENSMUSG00000036585/ENSMUSG00000024277/ENSMUSG00000042429/ENSMUSG00000047507/ENSMUSG00000033208/ENSMUSG00000050148/ENSMUSG00000021708/ENSMUSG00000025407/ENSMUSG00000035953/ENSMUSG00000027223/ENSMUSG00000022619/ENSMUSG00000006575/ENSMUSG00000034997/ENSMUSG00000000296/ENSMUSG00000026797/ENSMUSG00000037012/ENSMUSG00000019428/ENSMUSG00000030209/…	188
550	Down	GO:0007628	adult walking behavior	11/1598	45/21087	0.0004182	0.005970719	0.005103895	ENSMUSG00000029223/ENSMUSG00000000263/ENSMUSG00000028519/ENSMUSG00000034656/ENSMUSG00000051331/ENSMUSG00000011751/ENSMUSG00000063142/ENSMUSG00000028020/ENSMUSG00000060240/ENSMUSG00000064329/ENSMUSG00000023033	11
551	Down	GO:0010257	NADH dehydrogenase complex assembly	11/1598	45/21087	0.0004182	0.005970719	0.005103895	ENSMUSG00000059734/ENSMUSG00000040048/ENSMUSG00000027384/ENSMUSG00000027673/ENSMUSG00000030869/ENSMUSG00000026260/ENSMUSG00000025204/ENSMUSG00000002379/ENSMUSG00000022354/ENSMUSG00000071014/ENSMUSG00000020153	11
552	Down	GO:0032981	mitochondrial respiratory chain complex I assembly	11/1598	45/21087	0.0004182	0.005970719	0.005103895	ENSMUSG00000059734/ENSMUSG00000040048/ENSMUSG00000027384/ENSMUSG00000027673/ENSMUSG00000030869/ENSMUSG00000026260/ENSMUSG00000025204/ENSMUSG00000002379/ENSMUSG00000022354/ENSMUSG00000071014/ENSMUSG00000020153	11
553	Down	GO:0019287	isopentenyl diphosphate biosynthetic process, mevalonate pathway	3/1598	3/21087	0.000434442	0.006125905	0.005236551	ENSMUSG00000027952/ENSMUSG00000006517/ENSMUSG00000041939	3
554	Down	GO:0021586	pons maturation	3/1598	3/21087	0.000434442	0.006125905	0.005236551	ENSMUSG00000048895/ENSMUSG00000026959/ENSMUSG00000090071	3
555	Down	GO:0033693	neurofilament bundle assembly	3/1598	3/21087	0.000434442	0.006125905	0.005236551	ENSMUSG00000020396/ENSMUSG00000022054/ENSMUSG00000022055	3
556	Down	GO:0035494	SNARE complex disassembly	3/1598	3/21087	0.000434442	0.006125905	0.005236551	ENSMUSG00000027438/ENSMUSG00000034187/ENSMUSG00000006024	3
557	Down	GO:1903742	regulation of anterograde synaptic vesicle transport	3/1598	3/21087	0.000434442	0.006125905	0.005236551	ENSMUSG00000024873/ENSMUSG00000015222/ENSMUSG00000042992	3
558	Down	GO:1904020	regulation of G protein-coupled receptor internalization	3/1598	3/21087	0.000434442	0.006125905	0.005236551	ENSMUSG00000050148/ENSMUSG00000037010/ENSMUSG00000031837	3
559	Down	GO:0021954	central nervous system neuron development	17/1598	91/21087	0.000434511	0.006125905	0.005236551	ENSMUSG00000032537/ENSMUSG00000022883/ENSMUSG00000058230/ENSMUSG00000033253/ENSMUSG00000056124/ENSMUSG00000019194/ENSMUSG00000018736/ENSMUSG00000015222/ENSMUSG00000011751/ENSMUSG00000049556/ENSMUSG00000025630/ENSMUSG00000028078/ENSMUSG00000020262/ENSMUSG00000033004/ENSMUSG00000027797/ENSMUSG00000028467/ENSMUSG00000096014	17
560	Down	GO:0006942	regulation of striated muscle contraction	16/1598	83/21087	0.000440261	0.006184845	0.005286934	ENSMUSG00000042429/ENSMUSG00000019997/ENSMUSG00000021313/ENSMUSG00000024858/ENSMUSG00000024065/ENSMUSG00000061603/ENSMUSG00000021194/ENSMUSG00000020635/ENSMUSG00000079055/ENSMUSG00000028854/ENSMUSG00000050541/ENSMUSG00000071657/ENSMUSG00000051331/ENSMUSG00000032338/ENSMUSG00000026576/ENSMUSG00000053093	16
561	Down	GO:0043242	negative regulation of protein-containing complex disassembly	16/1598	83/21087	0.000440261	0.006184845	0.005286934	ENSMUSG00000020135/ENSMUSG00000027254/ENSMUSG00000050357/ENSMUSG00000090100/ENSMUSG00000022099/ENSMUSG00000030000/ENSMUSG00000033788/ENSMUSG00000064302/ENSMUSG00000015222/ENSMUSG00000021061/ENSMUSG00000044117/ENSMUSG00000044433/ENSMUSG00000027500/ENSMUSG00000057738/ENSMUSG00000052727/ENSMUSG00000021262	16
562	Down	GO:0032253	dense core granule localization	5/1598	10/21087	0.000452922	0.006340102	0.005419651	ENSMUSG00000015222/ENSMUSG00000074657/ENSMUSG00000042766/ENSMUSG00000063077/ENSMUSG00000014602	5
563	Down	GO:1901950	dense core granule transport	5/1598	10/21087	0.000452922	0.006340102	0.005419651	ENSMUSG00000015222/ENSMUSG00000074657/ENSMUSG00000042766/ENSMUSG00000063077/ENSMUSG00000014602	5
564	Down	GO:0051668	localization within membrane	19/1598	108/21087	0.000455193	0.006360598	0.005437171	ENSMUSG00000030209/ENSMUSG00000019146/ENSMUSG00000020886/ENSMUSG00000022623/ENSMUSG00000032011/ENSMUSG00000030098/ENSMUSG00000049551/ENSMUSG00000024873/ENSMUSG00000025656/ENSMUSG00000003378/ENSMUSG00000034656/ENSMUSG00000045294/ENSMUSG00000044716/ENSMUSG00000042873/ENSMUSG00000038555/ENSMUSG00000052572/ENSMUSG00000033768/ENSMUSG00000028136/ENSMUSG00000028020	19
565	Down	GO:0061572	actin filament bundle organization	26/1598	170/21087	0.0004636	0.006466602	0.005527785	ENSMUSG00000019997/ENSMUSG00000022623/ENSMUSG00000028991/ENSMUSG00000026697/ENSMUSG00000030685/ENSMUSG00000027805/ENSMUSG00000030043/ENSMUSG00000022099/ENSMUSG00000032827/ENSMUSG00000038738/ENSMUSG00000029674/ENSMUSG00000046442/ENSMUSG00000054855/ENSMUSG00000024501/ENSMUSG00000030000/ENSMUSG00000041729/ENSMUSG00000010154/ENSMUSG00000054728/ENSMUSG00000029449/ENSMUSG00000064302/ENSMUSG00000026181/…	26
566	Down	GO:0030307	positive regulation of cell growth	29/1598	198/21087	0.000471369	0.006563356	0.005610493	ENSMUSG00000041670/ENSMUSG00000059146/ENSMUSG00000022812/ENSMUSG00000030731/ENSMUSG00000038264/ENSMUSG00000028991/ENSMUSG00000033618/ENSMUSG00000051149/ENSMUSG00000061603/ENSMUSG00000031548/ENSMUSG00000028854/ENSMUSG00000026452/ENSMUSG00000062991/ENSMUSG00000023951/ENSMUSG00000029674/ENSMUSG00000022212/ENSMUSG00000028982/ENSMUSG00000029291/ENSMUSG00000031633/ENSMUSG00000006057/ENSMUSG00000018736/…	29
567	Down	GO:0090278	negative regulation of peptide hormone secretion	14/1598	68/21087	0.000492255	0.006842081	0.005848753	ENSMUSG00000021684/ENSMUSG00000054459/ENSMUSG00000028445/ENSMUSG00000096146/ENSMUSG00000028161/ENSMUSG00000021647/ENSMUSG00000021194/ENSMUSG00000020635/ENSMUSG00000031548/ENSMUSG00000040687/ENSMUSG00000040136/ENSMUSG00000050556/ENSMUSG00000028963/ENSMUSG00000029361	14
568	Down	GO:0031113	regulation of microtubule polymerization	12/1598	53/21087	0.000494927	0.00685505	0.005859839	ENSMUSG00000062591/ENSMUSG00000030357/ENSMUSG00000031865/ENSMUSG00000034570/ENSMUSG00000015222/ENSMUSG00000040811/ENSMUSG00000044433/ENSMUSG00000027500/ENSMUSG00000013921/ENSMUSG00000052727/ENSMUSG00000029166/ENSMUSG00000028467	12
569	Down	GO:0035176	social behavior	12/1598	53/21087	0.000494927	0.00685505	0.005859839	ENSMUSG00000072214/ENSMUSG00000022619/ENSMUSG00000020886/ENSMUSG00000022623/ENSMUSG00000028991/ENSMUSG00000041078/ENSMUSG00000051790/ENSMUSG00000026959/ENSMUSG00000038738/ENSMUSG00000039419/ENSMUSG00000033768/ENSMUSG00000028351	12
570	Down	GO:0009612	response to mechanical stimulus	27/1598	180/21087	0.000498109	0.006887011	0.00588716	ENSMUSG00000034997/ENSMUSG00000030209/ENSMUSG00000020366/ENSMUSG00000022812/ENSMUSG00000021313/ENSMUSG00000022623/ENSMUSG00000036062/ENSMUSG00000025190/ENSMUSG00000030043/ENSMUSG00000028854/ENSMUSG00000029361/ENSMUSG00000030302/ENSMUSG00000037578/ENSMUSG00000039137/ENSMUSG00000021983/ENSMUSG00000047976/ENSMUSG00000062252/ENSMUSG00000039419/ENSMUSG00000033768/ENSMUSG00000021476/ENSMUSG00000074968/…	27
571	Down	GO:0043523	regulation of neuron apoptotic process	36/1598	266/21087	0.000501105	0.006916306	0.005912201	ENSMUSG00000020099/ENSMUSG00000048895/ENSMUSG00000026797/ENSMUSG00000029167/ENSMUSG00000022812/ENSMUSG00000025499/ENSMUSG00000024962/ENSMUSG00000006476/ENSMUSG00000090223/ENSMUSG00000028756/ENSMUSG00000051149/ENSMUSG00000049551/ENSMUSG00000057177/ENSMUSG00000050556/ENSMUSG00000003378/ENSMUSG00000033352/ENSMUSG00000006818/ENSMUSG00000023011/ENSMUSG00000029361/ENSMUSG00000026959/ENSMUSG00000028086/…	36
572	Down	GO:0007616	long-term memory	10/1598	39/21087	0.000503673	0.006927485	0.005921758	ENSMUSG00000028991/ENSMUSG00000027273/ENSMUSG00000030043/ENSMUSG00000029053/ENSMUSG00000026959/ENSMUSG00000020431/ENSMUSG00000022602/ENSMUSG00000038738/ENSMUSG00000032193/ENSMUSG00000026080	10
573	Down	GO:0045806	negative regulation of endocytosis	10/1598	39/21087	0.000503673	0.006927485	0.005921758	ENSMUSG00000050148/ENSMUSG00000060780/ENSMUSG00000020886/ENSMUSG00000031837/ENSMUSG00000040722/ENSMUSG00000027257/ENSMUSG00000027457/ENSMUSG00000037907/ENSMUSG00000040276/ENSMUSG00000026792	10
574	Down	GO:0140056	organelle localization by membrane tethering	15/1598	76/21087	0.000506031	0.006947791	0.005939116	ENSMUSG00000072214/ENSMUSG00000026797/ENSMUSG00000041670/ENSMUSG00000031840/ENSMUSG00000034187/ENSMUSG00000030805/ENSMUSG00000003863/ENSMUSG00000034216/ENSMUSG00000050556/ENSMUSG00000030806/ENSMUSG00000036564/ENSMUSG00000020894/ENSMUSG00000003411/ENSMUSG00000033769/ENSMUSG00000025366	15
575	Down	GO:0033365	protein localization to organelle	110/1598	1065/21087	0.000516263	0.007065759	0.006039957	ENSMUSG00000024277/ENSMUSG00000034997/ENSMUSG00000037012/ENSMUSG00000019146/ENSMUSG00000026825/ENSMUSG00000025151/ENSMUSG00000006435/ENSMUSG00000020886/ENSMUSG00000022812/ENSMUSG00000025499/ENSMUSG00000021313/ENSMUSG00000021974/ENSMUSG00000011877/ENSMUSG00000033862/ENSMUSG00000025582/ENSMUSG00000028756/ENSMUSG00000024858/ENSMUSG00000024065/ENSMUSG00000027254/ENSMUSG00000025793/ENSMUSG00000059991/…	110
576	Down	GO:0035641	locomotory exploration behavior	6/1598	15/21087	0.000516416	0.007065759	0.006039957	ENSMUSG00000020886/ENSMUSG00000022623/ENSMUSG00000018634/ENSMUSG00000051790/ENSMUSG00000045038/ENSMUSG00000061080	6
577	Down	GO:0006875	cellular metal ion homeostasis	67/1598	588/21087	0.000526992	0.007197955	0.006152961	ENSMUSG00000032336/ENSMUSG00000033208/ENSMUSG00000027584/ENSMUSG00000034997/ENSMUSG00000030209/ENSMUSG00000003657/ENSMUSG00000020734/ENSMUSG00000020886/ENSMUSG00000039953/ENSMUSG00000022840/ENSMUSG00000021313/ENSMUSG00000030666/ENSMUSG00000078566/ENSMUSG00000018634/ENSMUSG00000019828/ENSMUSG00000030669/ENSMUSG00000032011/ENSMUSG00000061603/ENSMUSG00000049551/ENSMUSG00000045038/ENSMUSG00000021194/…	67
578	Down	GO:0055074	calcium ion homeostasis	58/1598	492/21087	0.000529109	0.007214367	0.006166991	ENSMUSG00000032336/ENSMUSG00000033208/ENSMUSG00000027584/ENSMUSG00000034997/ENSMUSG00000030209/ENSMUSG00000003657/ENSMUSG00000020734/ENSMUSG00000020886/ENSMUSG00000039953/ENSMUSG00000022840/ENSMUSG00000021313/ENSMUSG00000030666/ENSMUSG00000078566/ENSMUSG00000018634/ENSMUSG00000019828/ENSMUSG00000030669/ENSMUSG00000032011/ENSMUSG00000061603/ENSMUSG00000049551/ENSMUSG00000045038/ENSMUSG00000021194/…	58
579	Down	GO:0060322	head development	76/1598	686/21087	0.000533543	0.007262267	0.006207937	ENSMUSG00000025407/ENSMUSG00000048895/ENSMUSG00000005045/ENSMUSG00000022812/ENSMUSG00000038264/ENSMUSG00000022623/ENSMUSG00000019699/ENSMUSG00000031654/ENSMUSG00000055471/ENSMUSG00000032187/ENSMUSG00000000632/ENSMUSG00000021466/ENSMUSG00000031548/ENSMUSG00000058153/ENSMUSG00000024163/ENSMUSG00000029512/ENSMUSG00000006930/ENSMUSG00000048001/ENSMUSG00000022883/ENSMUSG00000017631/ENSMUSG00000090100/…	76
580	Down	GO:1901016	regulation of potassium ion transmembrane transporter activity	13/1598	61/21087	0.000546373	0.00742408	0.006346257	ENSMUSG00000061603/ENSMUSG00000040136/ENSMUSG00000027030/ENSMUSG00000020894/ENSMUSG00000069601/ENSMUSG00000052374/ENSMUSG00000047976/ENSMUSG00000028136/ENSMUSG00000050947/ENSMUSG00000058975/ENSMUSG00000074575/ENSMUSG00000026576/ENSMUSG00000027827	13
581	Down	GO:0040011	locomotion	173/1598	1800/21087	0.000555621	0.007533556	0.00643984	ENSMUSG00000017737/ENSMUSG00000020099/ENSMUSG00000032336/ENSMUSG00000036585/ENSMUSG00000024277/ENSMUSG00000042429/ENSMUSG00000025407/ENSMUSG00000048895/ENSMUSG00000057897/ENSMUSG00000020734/ENSMUSG00000021816/ENSMUSG00000029167/ENSMUSG00000059146/ENSMUSG00000032537/ENSMUSG00000006435/ENSMUSG00000019997/ENSMUSG00000022812/ENSMUSG00000025499/ENSMUSG00000020135/ENSMUSG00000025427/ENSMUSG00000038264/…	173
582	Down	GO:0043271	negative regulation of ion transport	26/1598	172/21087	0.000556342	0.007533556	0.00643984	ENSMUSG00000017737/ENSMUSG00000042429/ENSMUSG00000027584/ENSMUSG00000031748/ENSMUSG00000034997/ENSMUSG00000018634/ENSMUSG00000028991/ENSMUSG00000045038/ENSMUSG00000020635/ENSMUSG00000024462/ENSMUSG00000004035/ENSMUSG00000027030/ENSMUSG00000029361/ENSMUSG00000057880/ENSMUSG00000037989/ENSMUSG00000039059/ENSMUSG00000027257/ENSMUSG00000069601/ENSMUSG00000033788/ENSMUSG00000052374/ENSMUSG00000038319/…	26
583	Down	GO:0007163	establishment or maintenance of cell polarity	31/1598	219/21087	0.000557349	0.007534243	0.006440427	ENSMUSG00000032537/ENSMUSG00000022812/ENSMUSG00000053046/ENSMUSG00000030583/ENSMUSG00000035390/ENSMUSG00000050357/ENSMUSG00000048001/ENSMUSG00000029053/ENSMUSG00000058230/ENSMUSG00000054855/ENSMUSG00000037351/ENSMUSG00000031865/ENSMUSG00000029291/ENSMUSG00000029449/ENSMUSG00000033419/ENSMUSG00000018736/ENSMUSG00000064302/ENSMUSG00000015222/ENSMUSG00000025224/ENSMUSG00000052572/ENSMUSG00000024969/…	31
584	Down	GO:0035305	negative regulation of dephosphorylation	17/1598	93/21087	0.000564811	0.007619123	0.006512984	ENSMUSG00000020635/ENSMUSG00000038976/ENSMUSG00000036398/ENSMUSG00000018326/ENSMUSG00000068742/ENSMUSG00000039515/ENSMUSG00000052572/ENSMUSG00000044433/ENSMUSG00000048988/ENSMUSG00000060657/ENSMUSG00000069072/ENSMUSG00000035441/ENSMUSG00000038949/ENSMUSG00000043460/ENSMUSG00000051403/ENSMUSG00000029420/ENSMUSG00000062044	17
585	Down	GO:0030902	hindbrain development	25/1598	163/21087	0.000565561	0.007619123	0.006512984	ENSMUSG00000025407/ENSMUSG00000048895/ENSMUSG00000031654/ENSMUSG00000032187/ENSMUSG00000000632/ENSMUSG00000058153/ENSMUSG00000029512/ENSMUSG00000006930/ENSMUSG00000090100/ENSMUSG00000023011/ENSMUSG00000024039/ENSMUSG00000026959/ENSMUSG00000030683/ENSMUSG00000028519/ENSMUSG00000030302/ENSMUSG00000034656/ENSMUSG00000039137/ENSMUSG00000090071/ENSMUSG00000033565/ENSMUSG00000067889/ENSMUSG00000020900/…	25
586	Down	GO:0060997	dendritic spine morphogenesis	14/1598	69/21087	0.000575129	0.007734803	0.00661187	ENSMUSG00000048895/ENSMUSG00000057897/ENSMUSG00000032537/ENSMUSG00000020886/ENSMUSG00000022623/ENSMUSG00000042700/ENSMUSG00000042589/ENSMUSG00000057531/ENSMUSG00000033389/ENSMUSG00000025920/ENSMUSG00000032827/ENSMUSG00000022602/ENSMUSG00000038738/ENSMUSG00000040265	14
587	Down	GO:0042493	response to drug	96/1598	910/21087	0.000579052	0.007774288	0.006645623	ENSMUSG00000017737/ENSMUSG00000024524/ENSMUSG00000023064/ENSMUSG00000031748/ENSMUSG00000028542/ENSMUSG00000034997/ENSMUSG00000048895/ENSMUSG00000030209/ENSMUSG00000021816/ENSMUSG00000020366/ENSMUSG00000035863/ENSMUSG00000023017/ENSMUSG00000027577/ENSMUSG00000020886/ENSMUSG00000022840/ENSMUSG00000030731/ENSMUSG00000021313/ENSMUSG00000024743/ENSMUSG00000078566/ENSMUSG00000018634/ENSMUSG00000028991/…	96
588	Down	GO:0043268	positive regulation of potassium ion transport	12/1598	54/21087	0.000593032	0.007921504	0.006771466	ENSMUSG00000042429/ENSMUSG00000061603/ENSMUSG00000040136/ENSMUSG00000027030/ENSMUSG00000037989/ENSMUSG00000052374/ENSMUSG00000047976/ENSMUSG00000038319/ENSMUSG00000050947/ENSMUSG00000058975/ENSMUSG00000061576/ENSMUSG00000026576	12
589	Down	GO:0051930	regulation of sensory perception of pain	12/1598	54/21087	0.000593032	0.007921504	0.006771466	ENSMUSG00000042429/ENSMUSG00000027895/ENSMUSG00000027584/ENSMUSG00000028991/ENSMUSG00000019828/ENSMUSG00000024858/ENSMUSG00000028854/ENSMUSG00000029361/ENSMUSG00000030898/ENSMUSG00000002771/ENSMUSG00000032532/ENSMUSG00000040721	12
590	Down	GO:1903533	regulation of protein targeting	12/1598	54/21087	0.000593032	0.007921504	0.006771466	ENSMUSG00000048895/ENSMUSG00000025499/ENSMUSG00000028756/ENSMUSG00000030854/ENSMUSG00000057177/ENSMUSG00000050556/ENSMUSG00000022099/ENSMUSG00000054428/ENSMUSG00000028086/ENSMUSG00000069601/ENSMUSG00000028785/ENSMUSG00000015291	12
591	Down	GO:0045761	regulation of adenylate cyclase activity	31/1598	220/21087	0.000602722	0.008037318	0.006870466	ENSMUSG00000042429/ENSMUSG00000024524/ENSMUSG00000027584/ENSMUSG00000031748/ENSMUSG00000040133/ENSMUSG00000035863/ENSMUSG00000022840/ENSMUSG00000030666/ENSMUSG00000018634/ENSMUSG00000005580/ENSMUSG00000034730/ENSMUSG00000030669/ENSMUSG00000024858/ENSMUSG00000061603/ENSMUSG00000040009/ENSMUSG00000021194/ENSMUSG00000013033/ENSMUSG00000057177/ENSMUSG00000024462/ENSMUSG00000029361/ENSMUSG00000020431/…	31
592	Down	GO:0045859	regulation of protein kinase activity	78/1598	711/21087	0.000606529	0.008074417	0.006902179	ENSMUSG00000036585/ENSMUSG00000042429/ENSMUSG00000027223/ENSMUSG00000034997/ENSMUSG00000048895/ENSMUSG00000000296/ENSMUSG00000025151/ENSMUSG00000032601/ENSMUSG00000059146/ENSMUSG00000006435/ENSMUSG00000059981/ENSMUSG00000024777/ENSMUSG00000020886/ENSMUSG00000022812/ENSMUSG00000025499/ENSMUSG00000029223/ENSMUSG00000024948/ENSMUSG00000037887/ENSMUSG00000019471/ENSMUSG00000028991/ENSMUSG00000008734/…	78
593	Down	GO:0090659	walking behavior	11/1598	47/21087	0.000623758	0.008289781	0.007086277	ENSMUSG00000029223/ENSMUSG00000000263/ENSMUSG00000028519/ENSMUSG00000034656/ENSMUSG00000051331/ENSMUSG00000011751/ENSMUSG00000063142/ENSMUSG00000028020/ENSMUSG00000060240/ENSMUSG00000064329/ENSMUSG00000023033	11
594	Down	GO:0023057	negative regulation of signaling	141/1598	1429/21087	0.000637931	0.008463859	0.007235082	ENSMUSG00000017737/ENSMUSG00000020099/ENSMUSG00000042429/ENSMUSG00000021684/ENSMUSG00000027895/ENSMUSG00000024186/ENSMUSG00000050148/ENSMUSG00000025407/ENSMUSG00000027223/ENSMUSG00000027584/ENSMUSG00000022619/ENSMUSG00000017897/ENSMUSG00000050132/ENSMUSG00000034997/ENSMUSG00000026797/ENSMUSG00000026825/ENSMUSG00000057897/ENSMUSG00000042249/ENSMUSG00000040133/ENSMUSG00000006435/ENSMUSG00000005469/…	141
595	Down	GO:0021697	cerebellar cortex formation	8/1598	27/21087	0.000642732	0.008513231	0.007277286	ENSMUSG00000031654/ENSMUSG00000029512/ENSMUSG00000023011/ENSMUSG00000030302/ENSMUSG00000034656/ENSMUSG00000039137/ENSMUSG00000066129/ENSMUSG00000060240	8
596	Down	GO:0051100	negative regulation of binding	26/1598	174/21087	0.000664938	0.008792583	0.007516082	ENSMUSG00000022812/ENSMUSG00000022855/ENSMUSG00000039615/ENSMUSG00000051149/ENSMUSG00000028445/ENSMUSG00000028988/ENSMUSG00000028161/ENSMUSG00000057531/ENSMUSG00000054452/ENSMUSG00000041351/ENSMUSG00000090100/ENSMUSG00000028086/ENSMUSG00000031155/ENSMUSG00000025266/ENSMUSG00000028975/ENSMUSG00000042401/ENSMUSG00000033788/ENSMUSG00000015599/ENSMUSG00000015222/ENSMUSG00000029121/ENSMUSG00000021476/…	26
597	Down	GO:0019932	second-messenger-mediated signaling	65/1598	572/21087	0.000680319	0.008980889	0.00767705	ENSMUSG00000042429/ENSMUSG00000024524/ENSMUSG00000027584/ENSMUSG00000031748/ENSMUSG00000006575/ENSMUSG00000034997/ENSMUSG00000021816/ENSMUSG00000032601/ENSMUSG00000040133/ENSMUSG00000035863/ENSMUSG00000022812/ENSMUSG00000022840/ENSMUSG00000021313/ENSMUSG00000030666/ENSMUSG00000018634/ENSMUSG00000028991/ENSMUSG00000005580/ENSMUSG00000019828/ENSMUSG00000034730/ENSMUSG00000030669/ENSMUSG00000025855/…	65
598	Down	GO:0016049	cell growth	60/1598	519/21087	0.000702456	0.009257623	0.007913608	ENSMUSG00000048895/ENSMUSG00000041670/ENSMUSG00000059146/ENSMUSG00000039953/ENSMUSG00000022812/ENSMUSG00000030731/ENSMUSG00000038264/ENSMUSG00000029673/ENSMUSG00000028991/ENSMUSG00000033618/ENSMUSG00000020340/ENSMUSG00000051149/ENSMUSG00000061603/ENSMUSG00000032187/ENSMUSG00000031548/ENSMUSG00000057177/ENSMUSG00000029512/ENSMUSG00000038976/ENSMUSG00000033352/ENSMUSG00000028854/ENSMUSG00000008153/…	60
599	Down	GO:0051703	intraspecies interaction between organisms	12/1598	55/21087	0.000706944	0.009285705	0.007937613	ENSMUSG00000072214/ENSMUSG00000022619/ENSMUSG00000020886/ENSMUSG00000022623/ENSMUSG00000028991/ENSMUSG00000041078/ENSMUSG00000051790/ENSMUSG00000026959/ENSMUSG00000038738/ENSMUSG00000039419/ENSMUSG00000033768/ENSMUSG00000028351	12
600	Down	GO:0051931	regulation of sensory perception	12/1598	55/21087	0.000706944	0.009285705	0.007937613	ENSMUSG00000042429/ENSMUSG00000027895/ENSMUSG00000027584/ENSMUSG00000028991/ENSMUSG00000019828/ENSMUSG00000024858/ENSMUSG00000028854/ENSMUSG00000029361/ENSMUSG00000030898/ENSMUSG00000002771/ENSMUSG00000032532/ENSMUSG00000040721	12
601	Down	GO:0032386	regulation of intracellular transport	43/1598	342/21087	0.0007369	0.009663075	0.008260196	ENSMUSG00000048895/ENSMUSG00000026797/ENSMUSG00000005469/ENSMUSG00000022812/ENSMUSG00000025499/ENSMUSG00000020657/ENSMUSG00000018634/ENSMUSG00000028756/ENSMUSG00000024873/ENSMUSG00000030854/ENSMUSG00000057177/ENSMUSG00000033389/ENSMUSG00000050556/ENSMUSG00000006930/ENSMUSG00000042105/ENSMUSG00000022099/ENSMUSG00000036564/ENSMUSG00000054428/ENSMUSG00000020894/ENSMUSG00000028086/ENSMUSG00000045294/…	43
602	Down	GO:0015800	acidic amino acid transport	13/1598	63/21087	0.000756059	0.009881425	0.008446847	ENSMUSG00000042429/ENSMUSG00000026797/ENSMUSG00000030209/ENSMUSG00000030310/ENSMUSG00000057531/ENSMUSG00000024897/ENSMUSG00000024462/ENSMUSG00000057880/ENSMUSG00000039059/ENSMUSG00000032532/ENSMUSG00000004902/ENSMUSG00000019082/ENSMUSG00000027010	13
603	Down	GO:0061951	establishment of protein localization to plasma membrane	13/1598	63/21087	0.000756059	0.009881425	0.008446847	ENSMUSG00000024127/ENSMUSG00000030098/ENSMUSG00000034187/ENSMUSG00000029126/ENSMUSG00000033389/ENSMUSG00000020894/ENSMUSG00000069601/ENSMUSG00000032883/ENSMUSG00000031153/ENSMUSG00000028136/ENSMUSG00000034813/ENSMUSG00000038949/ENSMUSG00000020740	13
604	Down	GO:0021955	central nervous system neuron axonogenesis	10/1598	41/21087	0.000772937	0.009993412	0.008542575	ENSMUSG00000032537/ENSMUSG00000058230/ENSMUSG00000033253/ENSMUSG00000056124/ENSMUSG00000019194/ENSMUSG00000018736/ENSMUSG00000011751/ENSMUSG00000020262/ENSMUSG00000033004/ENSMUSG00000027797	10
605	Down	GO:2001258	negative regulation of cation channel activity	10/1598	41/21087	0.000772937	0.009993412	0.008542575	ENSMUSG00000017737/ENSMUSG00000027584/ENSMUSG00000018634/ENSMUSG00000020635/ENSMUSG00000004035/ENSMUSG00000069601/ENSMUSG00000033788/ENSMUSG00000028136/ENSMUSG00000035640/ENSMUSG00000027827	10
606	Down	GO:0032230	positive regulation of synaptic transmission, GABAergic	6/1598	16/21087	0.000773493	0.009993412	0.008542575	ENSMUSG00000031883/ENSMUSG00000051790/ENSMUSG00000045038/ENSMUSG00000006930/ENSMUSG00000030043/ENSMUSG00000030898	6
607	Down	GO:0044065	regulation of respiratory system process	6/1598	16/21087	0.000773493	0.009993412	0.008542575	ENSMUSG00000042429/ENSMUSG00000000263/ENSMUSG00000051790/ENSMUSG00000026103/ENSMUSG00000038718/ENSMUSG00000055932	6
608	Down	GO:0070262	peptidyl-serine dephosphorylation	6/1598	16/21087	0.000773493	0.009993412	0.008542575	ENSMUSG00000028161/ENSMUSG00000007564/ENSMUSG00000024500/ENSMUSG00000029120/ENSMUSG00000026181/ENSMUSG00000038582	6
609	Down	GO:0099638	endosome to plasma membrane protein transport	6/1598	16/21087	0.000773493	0.009993412	0.008542575	ENSMUSG00000030098/ENSMUSG00000029126/ENSMUSG00000033389/ENSMUSG00000031153/ENSMUSG00000028136/ENSMUSG00000034813	6
610	Down	GO:0014052	regulation of gamma-aminobutyric acid secretion	5/1598	11/21087	0.000778576	0.009993412	0.008542575	ENSMUSG00000030310/ENSMUSG00000024462/ENSMUSG00000057880/ENSMUSG00000039059/ENSMUSG00000038486	5
611	Down	GO:0019227	neuronal action potential propagation	5/1598	11/21087	0.000778576	0.009993412	0.008542575	ENSMUSG00000059146/ENSMUSG00000020635/ENSMUSG00000017167/ENSMUSG00000019194/ENSMUSG00000064329	5
612	Down	GO:0070142	synaptic vesicle budding	5/1598	11/21087	0.000778576	0.009993412	0.008542575	ENSMUSG00000026825/ENSMUSG00000020198/ENSMUSG00000033419/ENSMUSG00000040265/ENSMUSG00000031367	5
613	Down	GO:0098870	action potential propagation	5/1598	11/21087	0.000778576	0.009993412	0.008542575	ENSMUSG00000059146/ENSMUSG00000020635/ENSMUSG00000017167/ENSMUSG00000019194/ENSMUSG00000064329	5
614	Down	GO:0098887	neurotransmitter receptor transport, endosome to postsynaptic membrane	5/1598	11/21087	0.000778576	0.009993412	0.008542575	ENSMUSG00000030098/ENSMUSG00000029126/ENSMUSG00000033389/ENSMUSG00000031153/ENSMUSG00000034813	5
615	Down	GO:0010648	negative regulation of cell communication	140/1598	1425/21087	0.000794089	0.01017596	0.008698621	ENSMUSG00000017737/ENSMUSG00000020099/ENSMUSG00000042429/ENSMUSG00000021684/ENSMUSG00000027895/ENSMUSG00000024186/ENSMUSG00000050148/ENSMUSG00000025407/ENSMUSG00000027223/ENSMUSG00000027584/ENSMUSG00000022619/ENSMUSG00000017897/ENSMUSG00000050132/ENSMUSG00000034997/ENSMUSG00000026797/ENSMUSG00000026825/ENSMUSG00000057897/ENSMUSG00000042249/ENSMUSG00000040133/ENSMUSG00000006435/ENSMUSG00000005469/…	140
616	Down	GO:0035303	regulation of dephosphorylation	25/1598	167/21087	0.000812907	0.01040019	0.008890298	ENSMUSG00000042429/ENSMUSG00000006476/ENSMUSG00000028756/ENSMUSG00000020635/ENSMUSG00000038976/ENSMUSG00000036398/ENSMUSG00000018326/ENSMUSG00000068742/ENSMUSG00000014592/ENSMUSG00000039515/ENSMUSG00000024500/ENSMUSG00000001415/ENSMUSG00000052572/ENSMUSG00000044433/ENSMUSG00000048988/ENSMUSG00000033871/ENSMUSG00000060657/ENSMUSG00000023118/ENSMUSG00000069072/ENSMUSG00000035441/ENSMUSG00000038949/…	25
617	Down	GO:2001023	regulation of response to drug	20/1598	122/21087	0.000833441	0.010645616	0.009100093	ENSMUSG00000023064/ENSMUSG00000034997/ENSMUSG00000035863/ENSMUSG00000027577/ENSMUSG00000030731/ENSMUSG00000024743/ENSMUSG00000090223/ENSMUSG00000028756/ENSMUSG00000055471/ENSMUSG00000030854/ENSMUSG00000048142/ENSMUSG00000057531/ENSMUSG00000040724/ENSMUSG00000024462/ENSMUSG00000027220/ENSMUSG00000027030/ENSMUSG00000057880/ENSMUSG00000026452/ENSMUSG00000003411/ENSMUSG00000034656	20
618	Down	GO:0051259	protein complex oligomerization	69/1598	620/21087	0.000834901	0.010647015	0.009101289	ENSMUSG00000017737/ENSMUSG00000027895/ENSMUSG00000030209/ENSMUSG00000032601/ENSMUSG00000003575/ENSMUSG00000027577/ENSMUSG00000017314/ENSMUSG00000025499/ENSMUSG00000022623/ENSMUSG00000023328/ENSMUSG00000024065/ENSMUSG00000030685/ENSMUSG00000000263/ENSMUSG00000030310/ENSMUSG00000037653/ENSMUSG00000022454/ENSMUSG00000050556/ENSMUSG00000009292/ENSMUSG00000040724/ENSMUSG00000006818/ENSMUSG00000026932/…	69
619	Down	GO:0045724	positive regulation of cilium assembly	8/1598	28/21087	0.000840589	0.010684965	0.00913373	ENSMUSG00000006930/ENSMUSG00000090100/ENSMUSG00000058230/ENSMUSG00000030397/ENSMUSG00000047388/ENSMUSG00000033287/ENSMUSG00000042156/ENSMUSG00000031157	8
620	Down	GO:2000310	regulation of NMDA receptor activity	8/1598	28/21087	0.000840589	0.010684965	0.00913373	ENSMUSG00000021708/ENSMUSG00000022619/ENSMUSG00000029167/ENSMUSG00000020886/ENSMUSG00000032356/ENSMUSG00000028756/ENSMUSG00000029608/ENSMUSG00000024873	8
621	Down	GO:0055067	monovalent inorganic cation homeostasis	23/1598	149/21087	0.000841979	0.010685403	0.009134104	ENSMUSG00000042429/ENSMUSG00000031883/ENSMUSG00000038967/ENSMUSG00000030043/ENSMUSG00000028854/ENSMUSG00000028963/ENSMUSG00000030898/ENSMUSG00000017740/ENSMUSG00000025393/ENSMUSG00000063142/ENSMUSG00000038319/ENSMUSG00000020681/ENSMUSG00000040907/ENSMUSG00000038437/ENSMUSG00000055069/ENSMUSG00000029359/ENSMUSG00000006576/ENSMUSG00000019302/ENSMUSG00000014786/ENSMUSG00000026576/ENSMUSG00000039463/…	23
622	Down	GO:0051339	regulation of lyase activity	32/1598	235/21087	0.000898965	0.011390265	0.009736635	ENSMUSG00000042429/ENSMUSG00000024524/ENSMUSG00000027584/ENSMUSG00000031748/ENSMUSG00000040133/ENSMUSG00000035863/ENSMUSG00000022840/ENSMUSG00000030666/ENSMUSG00000018634/ENSMUSG00000005580/ENSMUSG00000034730/ENSMUSG00000030669/ENSMUSG00000024858/ENSMUSG00000061603/ENSMUSG00000040009/ENSMUSG00000021194/ENSMUSG00000013033/ENSMUSG00000057177/ENSMUSG00000024462/ENSMUSG00000029361/ENSMUSG00000020431/…	32
623	Down	GO:0008203	cholesterol metabolic process	20/1598	123/21087	0.00092579	0.011711323	0.010011081	ENSMUSG00000036585/ENSMUSG00000035953/ENSMUSG00000021259/ENSMUSG00000045294/ENSMUSG00000022351/ENSMUSG00000032193/ENSMUSG00000059743/ENSMUSG00000034926/ENSMUSG00000028467/ENSMUSG00000026944/ENSMUSG00000027952/ENSMUSG00000006517/ENSMUSG00000041939/ENSMUSG00000093930/ENSMUSG00000022463/ENSMUSG00000003271/ENSMUSG00000001467/ENSMUSG00000032018/ENSMUSG00000024799/ENSMUSG00000058454	20
624	Down	GO:0032970	regulation of actin filament-based process	48/1598	398/21087	0.000944772	0.011932288	0.010199967	ENSMUSG00000042429/ENSMUSG00000048895/ENSMUSG00000059146/ENSMUSG00000019997/ENSMUSG00000059981/ENSMUSG00000025499/ENSMUSG00000021313/ENSMUSG00000022623/ENSMUSG00000028991/ENSMUSG00000033862/ENSMUSG00000026697/ENSMUSG00000074238/ENSMUSG00000061603/ENSMUSG00000050357/ENSMUSG00000045038/ENSMUSG00000027805/ENSMUSG00000033389/ENSMUSG00000030043/ENSMUSG00000009292/ENSMUSG00000022099/ENSMUSG00000058230/…	48
625	Down	GO:0014042	positive regulation of neuron maturation	4/1598	7/21087	0.000954425	0.011977429	0.010238555	ENSMUSG00000028991/ENSMUSG00000033618/ENSMUSG00000030098/ENSMUSG00000030110	4
626	Down	GO:0042776	mitochondrial ATP synthesis coupled proton transport	4/1598	7/21087	0.000954425	0.011977429	0.010238555	ENSMUSG00000025393/ENSMUSG00000022956/ENSMUSG00000022551/ENSMUSG00000061518	4
627	Down	GO:0060012	synaptic transmission, glycinergic	4/1598	7/21087	0.000954425	0.011977429	0.010238555	ENSMUSG00000028542/ENSMUSG00000000263/ENSMUSG00000028020/ENSMUSG00000039728	4
628	Down	GO:1990048	anterograde neuronal dense core vesicle transport	4/1598	7/21087	0.000954425	0.011977429	0.010238555	ENSMUSG00000015222/ENSMUSG00000042766/ENSMUSG00000063077/ENSMUSG00000014602	4
629	Down	GO:0120034	positive regulation of plasma membrane bounded cell projection assembly	18/1598	106/21087	0.000976822	0.012239001	0.010462152	ENSMUSG00000006435/ENSMUSG00000035863/ENSMUSG00000025499/ENSMUSG00000029673/ENSMUSG00000028991/ENSMUSG00000050357/ENSMUSG00000006930/ENSMUSG00000090100/ENSMUSG00000058230/ENSMUSG00000024501/ENSMUSG00000030397/ENSMUSG00000047388/ENSMUSG00000018736/ENSMUSG00000036777/ENSMUSG00000033287/ENSMUSG00000040265/ENSMUSG00000042156/ENSMUSG00000031157	18
630	Down	GO:0042551	neuron maturation	12/1598	57/21087	0.000990074	0.012346156	0.01055375	ENSMUSG00000022812/ENSMUSG00000028991/ENSMUSG00000033618/ENSMUSG00000026697/ENSMUSG00000030098/ENSMUSG00000030110/ENSMUSG00000056124/ENSMUSG00000054855/ENSMUSG00000069601/ENSMUSG00000011751/ENSMUSG00000052572/ENSMUSG00000039419	12
631	Down	GO:0046676	negative regulation of insulin secretion	12/1598	57/21087	0.000990074	0.012346156	0.01055375	ENSMUSG00000021684/ENSMUSG00000054459/ENSMUSG00000028445/ENSMUSG00000096146/ENSMUSG00000028161/ENSMUSG00000021194/ENSMUSG00000020635/ENSMUSG00000031548/ENSMUSG00000040136/ENSMUSG00000050556/ENSMUSG00000028963/ENSMUSG00000029361	12
632	Down	GO:0072347	response to anesthetic	12/1598	57/21087	0.000990074	0.012346156	0.01055375	ENSMUSG00000034997/ENSMUSG00000020886/ENSMUSG00000018634/ENSMUSG00000028991/ENSMUSG00000025813/ENSMUSG00000045038/ENSMUSG00000038976/ENSMUSG00000029361/ENSMUSG00000057880/ENSMUSG00000026959/ENSMUSG00000050541/ENSMUSG00000008855	12
633	Down	GO:0019220	regulation of phosphate metabolic process	165/1598	1728/21087	0.000997226	0.012415698	0.010613196	ENSMUSG00000017737/ENSMUSG00000036585/ENSMUSG00000042429/ENSMUSG00000027223/ENSMUSG00000022619/ENSMUSG00000034997/ENSMUSG00000048895/ENSMUSG00000000296/ENSMUSG00000019428/ENSMUSG00000030209/ENSMUSG00000042249/ENSMUSG00000025151/ENSMUSG00000029167/ENSMUSG00000020366/ENSMUSG00000032601/ENSMUSG00000059146/ENSMUSG00000032537/ENSMUSG00000006435/ENSMUSG00000019997/ENSMUSG00000059981/ENSMUSG00000024777/…	165
634	Down	GO:0022406	membrane docking	15/1598	81/21087	0.001015286	0.012600744	0.010771377	ENSMUSG00000072214/ENSMUSG00000026797/ENSMUSG00000041670/ENSMUSG00000031840/ENSMUSG00000034187/ENSMUSG00000030805/ENSMUSG00000003863/ENSMUSG00000034216/ENSMUSG00000050556/ENSMUSG00000030806/ENSMUSG00000036564/ENSMUSG00000020894/ENSMUSG00000003411/ENSMUSG00000033769/ENSMUSG00000025366	15
635	Down	GO:0043279	response to alkaloid	15/1598	81/21087	0.001015286	0.012600744	0.010771377	ENSMUSG00000024524/ENSMUSG00000034997/ENSMUSG00000020886/ENSMUSG00000021313/ENSMUSG00000018634/ENSMUSG00000028991/ENSMUSG00000025813/ENSMUSG00000045038/ENSMUSG00000038976/ENSMUSG00000004035/ENSMUSG00000029361/ENSMUSG00000057880/ENSMUSG00000026959/ENSMUSG00000050541/ENSMUSG00000008855	15
636	Down	GO:0051174	regulation of phosphorus metabolic process	165/1598	1729/21087	0.001022714	0.012672971	0.010833118	ENSMUSG00000017737/ENSMUSG00000036585/ENSMUSG00000042429/ENSMUSG00000027223/ENSMUSG00000022619/ENSMUSG00000034997/ENSMUSG00000048895/ENSMUSG00000000296/ENSMUSG00000019428/ENSMUSG00000030209/ENSMUSG00000042249/ENSMUSG00000025151/ENSMUSG00000029167/ENSMUSG00000020366/ENSMUSG00000032601/ENSMUSG00000059146/ENSMUSG00000032537/ENSMUSG00000006435/ENSMUSG00000019997/ENSMUSG00000059981/ENSMUSG00000024777/…	165
637	Down	GO:0015850	organic hydroxy compound transport	32/1598	237/21087	0.001037758	0.012839196	0.010975211	ENSMUSG00000023064/ENSMUSG00000034997/ENSMUSG00000027577/ENSMUSG00000030731/ENSMUSG00000024743/ENSMUSG00000018634/ENSMUSG00000090223/ENSMUSG00000028756/ENSMUSG00000024858/ENSMUSG00000021647/ENSMUSG00000048142/ENSMUSG00000021194/ENSMUSG00000057531/ENSMUSG00000021466/ENSMUSG00000050556/ENSMUSG00000040724/ENSMUSG00000024462/ENSMUSG00000027220/ENSMUSG00000029361/ENSMUSG00000057880/ENSMUSG00000026452/…	32
638	Down	GO:1903532	positive regulation of secretion by cell	56/1598	485/21087	0.001069743	0.013214176	0.011295752	ENSMUSG00000020891/ENSMUSG00000047507/ENSMUSG00000072214/ENSMUSG00000026797/ENSMUSG00000037012/ENSMUSG00000030209/ENSMUSG00000021816/ENSMUSG00000058441/ENSMUSG00000020366/ENSMUSG00000041670/ENSMUSG00000031840/ENSMUSG00000027577/ENSMUSG00000024743/ENSMUSG00000018634/ENSMUSG00000037010/ENSMUSG00000040794/ENSMUSG00000090223/ENSMUSG00000028756/ENSMUSG00000024858/ENSMUSG00000054459/ENSMUSG00000025793/…	56
639	Down	GO:0033173	calcineurin-NFAT signaling cascade	11/1598	50/21087	0.001084581	0.013376496	0.011434506	ENSMUSG00000021816/ENSMUSG00000022812/ENSMUSG00000028991/ENSMUSG00000061603/ENSMUSG00000025813/ENSMUSG00000028161/ENSMUSG00000028854/ENSMUSG00000008136/ENSMUSG00000062991/ENSMUSG00000028782/ENSMUSG00000014592	11
640	Down	GO:1904063	negative regulation of cation transmembrane transport	16/1598	90/21087	0.001107003	0.013631702	0.011652661	ENSMUSG00000017737/ENSMUSG00000027584/ENSMUSG00000018634/ENSMUSG00000045038/ENSMUSG00000020635/ENSMUSG00000004035/ENSMUSG00000027030/ENSMUSG00000029361/ENSMUSG00000069601/ENSMUSG00000033788/ENSMUSG00000052374/ENSMUSG00000038319/ENSMUSG00000028136/ENSMUSG00000025825/ENSMUSG00000035640/ENSMUSG00000027827	16
641	Down	GO:0035372	protein localization to microtubule	6/1598	17/21087	0.001119171	0.013738604	0.011744044	ENSMUSG00000024277/ENSMUSG00000022812/ENSMUSG00000027254/ENSMUSG00000090100/ENSMUSG00000003346/ENSMUSG00000029166	6
642	Down	GO:0099640	axo-dendritic protein transport	6/1598	17/21087	0.001119171	0.013738604	0.011744044	ENSMUSG00000027254/ENSMUSG00000024163/ENSMUSG00000025920/ENSMUSG00000052572/ENSMUSG00000074657/ENSMUSG00000018395	6
643	Down	GO:0008277	regulation of G protein-coupled receptor signaling pathway	20/1598	125/21087	0.001137088	0.013911734	0.011892038	ENSMUSG00000050148/ENSMUSG00000027584/ENSMUSG00000026825/ENSMUSG00000057897/ENSMUSG00000042249/ENSMUSG00000037010/ENSMUSG00000036062/ENSMUSG00000011877/ENSMUSG00000024858/ENSMUSG00000031144/ENSMUSG00000031837/ENSMUSG00000025813/ENSMUSG00000037653/ENSMUSG00000021194/ENSMUSG00000057177/ENSMUSG00000038976/ENSMUSG00000029361/ENSMUSG00000018326/ENSMUSG00000043384/ENSMUSG00000006651	20
644	Down	GO:0018210	peptidyl-threonine modification	21/1598	134/21087	0.00113857	0.013911734	0.011892038	ENSMUSG00000048895/ENSMUSG00000037012/ENSMUSG00000005469/ENSMUSG00000022812/ENSMUSG00000019699/ENSMUSG00000028991/ENSMUSG00000003345/ENSMUSG00000033862/ENSMUSG00000024858/ENSMUSG00000040390/ENSMUSG00000029203/ENSMUSG00000057177/ENSMUSG00000029512/ENSMUSG00000090100/ENSMUSG00000022099/ENSMUSG00000027030/ENSMUSG00000029516/ENSMUSG00000015599/ENSMUSG00000038970/ENSMUSG00000042978/ENSMUSG00000021130	21
645	Down	GO:0034763	negative regulation of transmembrane transport	21/1598	134/21087	0.00113857	0.013911734	0.011892038	ENSMUSG00000017737/ENSMUSG00000027584/ENSMUSG00000018634/ENSMUSG00000028991/ENSMUSG00000024858/ENSMUSG00000045038/ENSMUSG00000020635/ENSMUSG00000057177/ENSMUSG00000004035/ENSMUSG00000027030/ENSMUSG00000029361/ENSMUSG00000020176/ENSMUSG00000069601/ENSMUSG00000033788/ENSMUSG00000052374/ENSMUSG00000038319/ENSMUSG00000028136/ENSMUSG00000025825/ENSMUSG00000020681/ENSMUSG00000035640/ENSMUSG00000027827	21
646	Down	GO:0061337	cardiac conduction	12/1598	58/21087	0.001163619	0.014195795	0.01213486	ENSMUSG00000021313/ENSMUSG00000024065/ENSMUSG00000028854/ENSMUSG00000019194/ENSMUSG00000051331/ENSMUSG00000011751/ENSMUSG00000038319/ENSMUSG00000020866/ENSMUSG00000032338/ENSMUSG00000070304/ENSMUSG00000046480/ENSMUSG00000049281	12
647	Down	GO:0007020	microtubule nucleation	7/1598	23/21087	0.001176449	0.014285968	0.012211941	ENSMUSG00000031865/ENSMUSG00000018736/ENSMUSG00000064302/ENSMUSG00000035198/ENSMUSG00000051786/ENSMUSG00000040811/ENSMUSG00000045007	7
648	Down	GO:0035493	SNARE complex assembly	7/1598	23/21087	0.001176449	0.014285968	0.012211941	ENSMUSG00000026797/ENSMUSG00000027273/ENSMUSG00000030805/ENSMUSG00000034216/ENSMUSG00000045114/ENSMUSG00000030337/ENSMUSG00000020894	7
649	Down	GO:1900242	regulation of synaptic vesicle endocytosis	7/1598	23/21087	0.001176449	0.014285968	0.012211941	ENSMUSG00000026825/ENSMUSG00000021816/ENSMUSG00000024743/ENSMUSG00000040722/ENSMUSG00000033419/ENSMUSG00000034902/ENSMUSG00000022841	7
650	Down	GO:0071248	cellular response to metal ion	23/1598	153/21087	0.001216075	0.014744441	0.012603854	ENSMUSG00000017737/ENSMUSG00000020366/ENSMUSG00000020886/ENSMUSG00000030731/ENSMUSG00000024743/ENSMUSG00000078566/ENSMUSG00000025582/ENSMUSG00000000263/ENSMUSG00000057177/ENSMUSG00000009292/ENSMUSG00000027220/ENSMUSG00000022099/ENSMUSG00000026452/ENSMUSG00000069601/ENSMUSG00000028785/ENSMUSG00000022212/ENSMUSG00000038028/ENSMUSG00000004567/ENSMUSG00000052572/ENSMUSG00000047976/ENSMUSG00000036622/…	23
651	Down	GO:0048638	regulation of developmental growth	48/1598	403/21087	0.001232622	0.014917575	0.012751852	ENSMUSG00000025407/ENSMUSG00000048895/ENSMUSG00000041670/ENSMUSG00000059146/ENSMUSG00000022812/ENSMUSG00000030731/ENSMUSG00000038264/ENSMUSG00000028991/ENSMUSG00000021974/ENSMUSG00000033618/ENSMUSG00000051149/ENSMUSG00000061603/ENSMUSG00000042817/ENSMUSG00000021466/ENSMUSG00000031548/ENSMUSG00000057177/ENSMUSG00000029512/ENSMUSG00000026452/ENSMUSG00000062991/ENSMUSG00000023951/ENSMUSG00000010066/…	48
652	Down	GO:1901615	organic hydroxy compound metabolic process	56/1598	488/21087	0.00123414	0.014917575	0.012751852	ENSMUSG00000036585/ENSMUSG00000035953/ENSMUSG00000042249/ENSMUSG00000001666/ENSMUSG00000026179/ENSMUSG00000025190/ENSMUSG00000021259/ENSMUSG00000057880/ENSMUSG00000030302/ENSMUSG00000045294/ENSMUSG00000033788/ENSMUSG00000022351/ENSMUSG00000038028/ENSMUSG00000034570/ENSMUSG00000034891/ENSMUSG00000025630/ENSMUSG00000063142/ENSMUSG00000032193/ENSMUSG00000059743/ENSMUSG00000034926/ENSMUSG00000116165/…	56
653	Down	GO:0043244	regulation of protein-containing complex disassembly	19/1598	117/21087	0.001247011	0.014968375	0.012795277	ENSMUSG00000020135/ENSMUSG00000078566/ENSMUSG00000027254/ENSMUSG00000050357/ENSMUSG00000090100/ENSMUSG00000022099/ENSMUSG00000030000/ENSMUSG00000033788/ENSMUSG00000052374/ENSMUSG00000064302/ENSMUSG00000015222/ENSMUSG00000021061/ENSMUSG00000044117/ENSMUSG00000044433/ENSMUSG00000027500/ENSMUSG00000057738/ENSMUSG00000052727/ENSMUSG00000021262/ENSMUSG00000116165	19
654	Down	GO:0006123	mitochondrial electron transport, cytochrome c to oxygen	5/1598	12/21087	0.001251638	0.014968375	0.012795277	ENSMUSG00000064351/ENSMUSG00000000088/ENSMUSG00000041697/ENSMUSG00000031818/ENSMUSG00000061518	5
655	Down	GO:0015816	glycine transport	5/1598	12/21087	0.001251638	0.014968375	0.012795277	ENSMUSG00000028542/ENSMUSG00000020261/ENSMUSG00000027894/ENSMUSG00000037771/ENSMUSG00000039728	5
656	Down	GO:0019646	aerobic electron transport chain	5/1598	12/21087	0.001251638	0.014968375	0.012795277	ENSMUSG00000064351/ENSMUSG00000000088/ENSMUSG00000041697/ENSMUSG00000031818/ENSMUSG00000061518	5
657	Down	GO:0019896	axonal transport of mitochondrion	5/1598	12/21087	0.001251638	0.014968375	0.012795277	ENSMUSG00000029223/ENSMUSG00000006930/ENSMUSG00000032118/ENSMUSG00000055407/ENSMUSG00000022055	5
658	Down	GO:0045161	neuronal ion channel clustering	5/1598	12/21087	0.001251638	0.014968375	0.012795277	ENSMUSG00000026697/ENSMUSG00000069601/ENSMUSG00000011751/ENSMUSG00000052572/ENSMUSG00000039419	5
659	Down	GO:0099639	neurotransmitter receptor transport, endosome to plasma membrane	5/1598	12/21087	0.001251638	0.014968375	0.012795277	ENSMUSG00000030098/ENSMUSG00000029126/ENSMUSG00000033389/ENSMUSG00000031153/ENSMUSG00000034813	5
660	Down	GO:0018107	peptidyl-threonine phosphorylation	20/1598	126/21087	0.001257365	0.015014083	0.012834349	ENSMUSG00000048895/ENSMUSG00000037012/ENSMUSG00000005469/ENSMUSG00000022812/ENSMUSG00000019699/ENSMUSG00000028991/ENSMUSG00000003345/ENSMUSG00000033862/ENSMUSG00000024858/ENSMUSG00000040390/ENSMUSG00000029203/ENSMUSG00000057177/ENSMUSG00000029512/ENSMUSG00000090100/ENSMUSG00000022099/ENSMUSG00000027030/ENSMUSG00000029516/ENSMUSG00000015599/ENSMUSG00000038970/ENSMUSG00000042978	20
661	Down	GO:0061001	regulation of dendritic spine morphogenesis	11/1598	51/21087	0.001289577	0.015352196	0.013123375	ENSMUSG00000048895/ENSMUSG00000057897/ENSMUSG00000022623/ENSMUSG00000042700/ENSMUSG00000042589/ENSMUSG00000057531/ENSMUSG00000033389/ENSMUSG00000025920/ENSMUSG00000032827/ENSMUSG00000022602/ENSMUSG00000040265	11
662	Down	GO:2000649	regulation of sodium ion transmembrane transporter activity	11/1598	51/21087	0.001289577	0.015352196	0.013123375	ENSMUSG00000028854/ENSMUSG00000027030/ENSMUSG00000037989/ENSMUSG00000069601/ENSMUSG00000019194/ENSMUSG00000029359/ENSMUSG00000036578/ENSMUSG00000070304/ENSMUSG00000026576/ENSMUSG00000046480/ENSMUSG00000049281	11
663	Down	GO:0120032	regulation of plasma membrane bounded cell projection assembly	26/1598	182/21087	0.001305644	0.015520033	0.013266846	ENSMUSG00000006435/ENSMUSG00000035863/ENSMUSG00000025499/ENSMUSG00000029673/ENSMUSG00000028991/ENSMUSG00000033862/ENSMUSG00000050357/ENSMUSG00000027805/ENSMUSG00000041351/ENSMUSG00000006930/ENSMUSG00000009292/ENSMUSG00000090100/ENSMUSG00000022099/ENSMUSG00000058230/ENSMUSG00000025920/ENSMUSG00000032827/ENSMUSG00000024501/ENSMUSG00000030397/ENSMUSG00000047388/ENSMUSG00000018736/ENSMUSG00000036777/…	26
664	Down	GO:1903829	positive regulation of cellular protein localization	38/1598	301/21087	0.00134576	0.015972795	0.013653876	ENSMUSG00000048895/ENSMUSG00000019146/ENSMUSG00000005469/ENSMUSG00000022812/ENSMUSG00000025499/ENSMUSG00000021567/ENSMUSG00000030098/ENSMUSG00000027254/ENSMUSG00000096146/ENSMUSG00000031837/ENSMUSG00000033170/ENSMUSG00000030854/ENSMUSG00000001507/ENSMUSG00000051790/ENSMUSG00000030805/ENSMUSG00000057177/ENSMUSG00000050556/ENSMUSG00000038976/ENSMUSG00000020894/ENSMUSG00000028086/ENSMUSG00000062991/…	38
665	Down	GO:0044380	protein localization to cytoskeleton	12/1598	59/21087	0.00136163	0.01613685	0.013794114	ENSMUSG00000024277/ENSMUSG00000034997/ENSMUSG00000022812/ENSMUSG00000027254/ENSMUSG00000038976/ENSMUSG00000090100/ENSMUSG00000030397/ENSMUSG00000038241/ENSMUSG00000036777/ENSMUSG00000002055/ENSMUSG00000003346/ENSMUSG00000029166	12
666	Down	GO:0002028	regulation of sodium ion transport	16/1598	92/21087	0.001409305	0.016651772	0.01423428	ENSMUSG00000019699/ENSMUSG00000028854/ENSMUSG00000027030/ENSMUSG00000029361/ENSMUSG00000037989/ENSMUSG00000069601/ENSMUSG00000019194/ENSMUSG00000011751/ENSMUSG00000038437/ENSMUSG00000029359/ENSMUSG00000036578/ENSMUSG00000070304/ENSMUSG00000026576/ENSMUSG00000027574/ENSMUSG00000046480/ENSMUSG00000049281	16
667	Down	GO:0070252	actin-mediated cell contraction	16/1598	92/21087	0.001409305	0.016651772	0.01423428	ENSMUSG00000042429/ENSMUSG00000021313/ENSMUSG00000061603/ENSMUSG00000029361/ENSMUSG00000019194/ENSMUSG00000051331/ENSMUSG00000038319/ENSMUSG00000030770/ENSMUSG00000020866/ENSMUSG00000032338/ENSMUSG00000070304/ENSMUSG00000064329/ENSMUSG00000046480/ENSMUSG00000049281/ENSMUSG00000053093/ENSMUSG00000039824	16
668	Down	GO:0031279	regulation of cyclase activity	31/1598	232/21087	0.001459452	0.017218478	0.014718712	ENSMUSG00000042429/ENSMUSG00000024524/ENSMUSG00000027584/ENSMUSG00000031748/ENSMUSG00000040133/ENSMUSG00000035863/ENSMUSG00000022840/ENSMUSG00000030666/ENSMUSG00000018634/ENSMUSG00000005580/ENSMUSG00000034730/ENSMUSG00000030669/ENSMUSG00000024858/ENSMUSG00000061603/ENSMUSG00000040009/ENSMUSG00000021194/ENSMUSG00000013033/ENSMUSG00000057177/ENSMUSG00000024462/ENSMUSG00000029361/ENSMUSG00000020431/…	31
669	Down	GO:0051047	positive regulation of secretion	60/1598	535/21087	0.001470232	0.017319725	0.01480526	ENSMUSG00000020891/ENSMUSG00000042429/ENSMUSG00000047507/ENSMUSG00000072214/ENSMUSG00000027584/ENSMUSG00000026797/ENSMUSG00000037012/ENSMUSG00000030209/ENSMUSG00000021816/ENSMUSG00000058441/ENSMUSG00000020366/ENSMUSG00000041670/ENSMUSG00000031840/ENSMUSG00000027577/ENSMUSG00000024743/ENSMUSG00000018634/ENSMUSG00000037010/ENSMUSG00000040794/ENSMUSG00000090223/ENSMUSG00000028756/ENSMUSG00000024858/…	60
670	Down	GO:0007019	microtubule depolymerization	11/1598	52/21087	0.001525334	0.017942028	0.015337217	ENSMUSG00000020135/ENSMUSG00000027254/ENSMUSG00000027581/ENSMUSG00000090100/ENSMUSG00000033788/ENSMUSG00000064302/ENSMUSG00000015222/ENSMUSG00000044117/ENSMUSG00000044433/ENSMUSG00000027500/ENSMUSG00000052727	11
671	Down	GO:0060491	regulation of cell projection assembly	26/1598	184/21087	0.00153148	0.017987473	0.015376065	ENSMUSG00000006435/ENSMUSG00000035863/ENSMUSG00000025499/ENSMUSG00000029673/ENSMUSG00000028991/ENSMUSG00000033862/ENSMUSG00000050357/ENSMUSG00000027805/ENSMUSG00000041351/ENSMUSG00000006930/ENSMUSG00000009292/ENSMUSG00000090100/ENSMUSG00000022099/ENSMUSG00000058230/ENSMUSG00000025920/ENSMUSG00000032827/ENSMUSG00000024501/ENSMUSG00000030397/ENSMUSG00000047388/ENSMUSG00000018736/ENSMUSG00000036777/…	26
672	Down	GO:0006605	protein targeting	34/1598	263/21087	0.001571677	0.018352565	0.015688153	ENSMUSG00000042429/ENSMUSG00000048895/ENSMUSG00000019146/ENSMUSG00000025499/ENSMUSG00000028756/ENSMUSG00000051391/ENSMUSG00000025793/ENSMUSG00000030854/ENSMUSG00000057177/ENSMUSG00000050556/ENSMUSG00000006930/ENSMUSG00000024847/ENSMUSG00000022099/ENSMUSG00000054428/ENSMUSG00000028086/ENSMUSG00000018326/ENSMUSG00000028975/ENSMUSG00000024500/ENSMUSG00000069601/ENSMUSG00000002984/ENSMUSG00000028785/…	34
673	Down	GO:0021692	cerebellar Purkinje cell layer morphogenesis	6/1598	18/21087	0.001571879	0.018352565	0.015688153	ENSMUSG00000023011/ENSMUSG00000030302/ENSMUSG00000034656/ENSMUSG00000039137/ENSMUSG00000067889/ENSMUSG00000060240	6
674	Down	GO:0072578	neurotransmitter-gated ion channel clustering	6/1598	18/21087	0.001571879	0.018352565	0.015688153	ENSMUSG00000020886/ENSMUSG00000022623/ENSMUSG00000030098/ENSMUSG00000042873/ENSMUSG00000028136/ENSMUSG00000028020	6
675	Down	GO:0099171	presynaptic modulation of chemical synaptic transmission	6/1598	18/21087	0.001571879	0.018352565	0.015688153	ENSMUSG00000072214/ENSMUSG00000024743/ENSMUSG00000011877/ENSMUSG00000045114/ENSMUSG00000039713/ENSMUSG00000026452	6
676	Down	GO:0034622	cellular protein-containing complex assembly	101/1598	997/21087	0.001619267	0.018858857	0.016120942	ENSMUSG00000035953/ENSMUSG00000026797/ENSMUSG00000041670/ENSMUSG00000031840/ENSMUSG00000028991/ENSMUSG00000029073/ENSMUSG00000039615/ENSMUSG00000074238/ENSMUSG00000050357/ENSMUSG00000020708/ENSMUSG00000032187/ENSMUSG00000009894/ENSMUSG00000027438/ENSMUSG00000027273/ENSMUSG00000045038/ENSMUSG00000029126/ENSMUSG00000027805/ENSMUSG00000029203/ENSMUSG00000030805/ENSMUSG00000027951/ENSMUSG00000034216/…	101
677	Down	GO:0016482	cytosolic transport	22/1598	147/21087	0.001627626	0.018858857	0.016120942	ENSMUSG00000047507/ENSMUSG00000024743/ENSMUSG00000020802/ENSMUSG00000024127/ENSMUSG00000074238/ENSMUSG00000024065/ENSMUSG00000068747/ENSMUSG00000038039/ENSMUSG00000031865/ENSMUSG00000006058/ENSMUSG00000015222/ENSMUSG00000025224/ENSMUSG00000074657/ENSMUSG00000033628/ENSMUSG00000042766/ENSMUSG00000038970/ENSMUSG00000034973/ENSMUSG00000056185/ENSMUSG00000063077/ENSMUSG00000004849/ENSMUSG00000032549/…	22
678	Down	GO:0014053	negative regulation of gamma-aminobutyric acid secretion	3/1598	4/21087	0.001639172	0.018858857	0.016120942	ENSMUSG00000024462/ENSMUSG00000057880/ENSMUSG00000039059	3
679	Down	GO:0015988	energy coupled proton transmembrane transport, against electrochemical gradient	3/1598	4/21087	0.001639172	0.018858857	0.016120942	ENSMUSG00000020153/ENSMUSG00000064351/ENSMUSG00000064370	3
680	Down	GO:0015990	electron transport coupled proton transport	3/1598	4/21087	0.001639172	0.018858857	0.016120942	ENSMUSG00000020153/ENSMUSG00000064351/ENSMUSG00000064370	3
681	Down	GO:1901610	positive regulation of vesicle transport along microtubule	3/1598	4/21087	0.001639172	0.018858857	0.016120942	ENSMUSG00000015222/ENSMUSG00000042766/ENSMUSG00000042992	3
682	Down	GO:1903964	monounsaturated fatty acid metabolic process	3/1598	4/21087	0.001639172	0.018858857	0.016120942	ENSMUSG00000025202/ENSMUSG00000037071/ENSMUSG00000025203	3
683	Down	GO:1903966	monounsaturated fatty acid biosynthetic process	3/1598	4/21087	0.001639172	0.018858857	0.016120942	ENSMUSG00000025202/ENSMUSG00000037071/ENSMUSG00000025203	3
684	Down	GO:1904059	regulation of locomotor rhythm	3/1598	4/21087	0.001639172	0.018858857	0.016120942	ENSMUSG00000027584/ENSMUSG00000028991/ENSMUSG00000038872	3
685	Down	GO:1990926	short-term synaptic potentiation	3/1598	4/21087	0.001639172	0.018858857	0.016120942	ENSMUSG00000024743/ENSMUSG00000027273/ENSMUSG00000045114	3
686	Down	GO:0003254	regulation of membrane depolarization	10/1598	45/21087	0.001666835	0.019093494	0.016321514	ENSMUSG00000026697/ENSMUSG00000025190/ENSMUSG00000053192/ENSMUSG00000069601/ENSMUSG00000019194/ENSMUSG00000032532/ENSMUSG00000020866/ENSMUSG00000032338/ENSMUSG00000070304/ENSMUSG00000049281	10
687	Down	GO:0051646	mitochondrion localization	10/1598	45/21087	0.001666835	0.019093494	0.016321514	ENSMUSG00000029223/ENSMUSG00000006930/ENSMUSG00000034958/ENSMUSG00000026620/ENSMUSG00000025733/ENSMUSG00000032118/ENSMUSG00000052727/ENSMUSG00000055407/ENSMUSG00000022055/ENSMUSG00000063077	10
688	Down	GO:1901381	positive regulation of potassium ion transmembrane transport	10/1598	45/21087	0.001666835	0.019093494	0.016321514	ENSMUSG00000061603/ENSMUSG00000040136/ENSMUSG00000037989/ENSMUSG00000052374/ENSMUSG00000047976/ENSMUSG00000038319/ENSMUSG00000050947/ENSMUSG00000058975/ENSMUSG00000061576/ENSMUSG00000026576	10
689	Down	GO:0048583	regulation of response to stimulus	338/1598	3871/21087	0.00172859	0.019772163	0.016901655	ENSMUSG00000017737/ENSMUSG00000020099/ENSMUSG00000020891/ENSMUSG00000036585/ENSMUSG00000024277/ENSMUSG00000042429/ENSMUSG00000047507/ENSMUSG00000024524/ENSMUSG00000033208/ENSMUSG00000021684/ENSMUSG00000024186/ENSMUSG00000050148/ENSMUSG00000021708/ENSMUSG00000025407/ENSMUSG00000023064/ENSMUSG00000035953/ENSMUSG00000027223/ENSMUSG00000027584/ENSMUSG00000031748/ENSMUSG00000022619/ENSMUSG00000017897/…	338
690	Down	GO:0007188	adenylate cyclase-modulating G protein-coupled receptor signaling pathway	28/1598	205/21087	0.001738215	0.019846184	0.01696493	ENSMUSG00000042429/ENSMUSG00000024524/ENSMUSG00000027584/ENSMUSG00000031748/ENSMUSG00000040133/ENSMUSG00000035863/ENSMUSG00000022840/ENSMUSG00000030666/ENSMUSG00000018634/ENSMUSG00000005580/ENSMUSG00000034730/ENSMUSG00000030669/ENSMUSG00000024858/ENSMUSG00000040009/ENSMUSG00000021194/ENSMUSG00000013033/ENSMUSG00000057177/ENSMUSG00000024462/ENSMUSG00000029361/ENSMUSG00000020431/ENSMUSG00000050541/…	28
691	Down	GO:0062149	detection of stimulus involved in sensory perception of pain	8/1598	31/21087	0.001740098	0.019846184	0.01696493	ENSMUSG00000042429/ENSMUSG00000034997/ENSMUSG00000030209/ENSMUSG00000032537/ENSMUSG00000036062/ENSMUSG00000030669/ENSMUSG00000047976/ENSMUSG00000064329	8
692	Down	GO:0038007	netrin-activated signaling pathway	4/1598	8/21087	0.001794323	0.020352227	0.017397505	ENSMUSG00000020099/ENSMUSG00000025876/ENSMUSG00000062380/ENSMUSG00000050272	4
693	Down	GO:0060371	regulation of atrial cardiac muscle cell membrane depolarization	4/1598	8/21087	0.001794323	0.020352227	0.017397505	ENSMUSG00000019194/ENSMUSG00000020866/ENSMUSG00000070304/ENSMUSG00000049281	4
694	Down	GO:0097720	calcineurin-mediated signaling	11/1598	53/21087	0.001795203	0.020352227	0.017397505	ENSMUSG00000021816/ENSMUSG00000022812/ENSMUSG00000028991/ENSMUSG00000061603/ENSMUSG00000025813/ENSMUSG00000028161/ENSMUSG00000028854/ENSMUSG00000008136/ENSMUSG00000062991/ENSMUSG00000028782/ENSMUSG00000014592	11
695	Down	GO:1901215	negative regulation of neuron death	32/1598	245/21087	0.001797014	0.020352227	0.017397505	ENSMUSG00000020099/ENSMUSG00000023064/ENSMUSG00000026797/ENSMUSG00000029167/ENSMUSG00000022812/ENSMUSG00000025499/ENSMUSG00000018634/ENSMUSG00000024962/ENSMUSG00000090223/ENSMUSG00000028756/ENSMUSG00000051149/ENSMUSG00000049551/ENSMUSG00000021194/ENSMUSG00000057531/ENSMUSG00000033352/ENSMUSG00000006818/ENSMUSG00000023011/ENSMUSG00000029361/ENSMUSG00000026959/ENSMUSG00000023951/ENSMUSG00000034656/…	32
696	Down	GO:0044092	negative regulation of molecular function	108/1598	1081/21087	0.00179738	0.020352227	0.017397505	ENSMUSG00000017737/ENSMUSG00000042429/ENSMUSG00000027223/ENSMUSG00000027584/ENSMUSG00000029167/ENSMUSG00000032601/ENSMUSG00000040133/ENSMUSG00000035863/ENSMUSG00000022812/ENSMUSG00000025499/ENSMUSG00000022840/ENSMUSG00000029223/ENSMUSG00000022855/ENSMUSG00000037887/ENSMUSG00000018634/ENSMUSG00000046447/ENSMUSG00000090223/ENSMUSG00000032011/ENSMUSG00000039615/ENSMUSG00000025855/ENSMUSG00000024858/…	108
697	Down	GO:1902305	regulation of sodium ion transmembrane transport	12/1598	61/21087	0.001841425	0.020803209	0.017783014	ENSMUSG00000028854/ENSMUSG00000027030/ENSMUSG00000029361/ENSMUSG00000037989/ENSMUSG00000069601/ENSMUSG00000019194/ENSMUSG00000029359/ENSMUSG00000036578/ENSMUSG00000070304/ENSMUSG00000026576/ENSMUSG00000046480/ENSMUSG00000049281	12
698	Down	GO:0044283	small molecule biosynthetic process	63/1598	573/21087	0.001842487	0.020803209	0.017783014	ENSMUSG00000020891/ENSMUSG00000036585/ENSMUSG00000029167/ENSMUSG00000020366/ENSMUSG00000038967/ENSMUSG00000025190/ENSMUSG00000024039/ENSMUSG00000057880/ENSMUSG00000045294/ENSMUSG00000033579/ENSMUSG00000032883/ENSMUSG00000032294/ENSMUSG00000026103/ENSMUSG00000060279/ENSMUSG00000025630/ENSMUSG00000030869/ENSMUSG00000059743/ENSMUSG00000034926/ENSMUSG00000020098/ENSMUSG00000032615/ENSMUSG00000028937/…	63
699	Down	GO:0032956	regulation of actin cytoskeleton organization	42/1598	348/21087	0.001873141	0.021119062	0.018053012	ENSMUSG00000048895/ENSMUSG00000059146/ENSMUSG00000019997/ENSMUSG00000059981/ENSMUSG00000025499/ENSMUSG00000022623/ENSMUSG00000028991/ENSMUSG00000033862/ENSMUSG00000026697/ENSMUSG00000074238/ENSMUSG00000050357/ENSMUSG00000045038/ENSMUSG00000027805/ENSMUSG00000033389/ENSMUSG00000030043/ENSMUSG00000009292/ENSMUSG00000022099/ENSMUSG00000058230/ENSMUSG00000025920/ENSMUSG00000032827/ENSMUSG00000038738/…	42
700	Down	GO:0007044	cell-substrate junction assembly	15/1598	86/21087	0.001902263	0.021354771	0.0182545	ENSMUSG00000059981/ENSMUSG00000026697/ENSMUSG00000032011/ENSMUSG00000069255/ENSMUSG00000022099/ENSMUSG00000023951/ENSMUSG00000041729/ENSMUSG00000026131/ENSMUSG00000055322/ENSMUSG00000052374/ENSMUSG00000064302/ENSMUSG00000026181/ENSMUSG00000044433/ENSMUSG00000020758/ENSMUSG00000022565	15
701	Down	GO:0150115	cell-substrate junction organization	15/1598	86/21087	0.001902263	0.021354771	0.0182545	ENSMUSG00000059981/ENSMUSG00000026697/ENSMUSG00000032011/ENSMUSG00000069255/ENSMUSG00000022099/ENSMUSG00000023951/ENSMUSG00000041729/ENSMUSG00000026131/ENSMUSG00000055322/ENSMUSG00000052374/ENSMUSG00000064302/ENSMUSG00000026181/ENSMUSG00000044433/ENSMUSG00000020758/ENSMUSG00000022565	15
702	Down	GO:0001778	plasma membrane repair	5/1598	13/21087	0.001907595	0.021354771	0.0182545	ENSMUSG00000031840/ENSMUSG00000024743/ENSMUSG00000033788/ENSMUSG00000020900/ENSMUSG00000018340	5
703	Down	GO:0002087	regulation of respiratory gaseous exchange by nervous system process	5/1598	13/21087	0.001907595	0.021354771	0.0182545	ENSMUSG00000042429/ENSMUSG00000000263/ENSMUSG00000051790/ENSMUSG00000026103/ENSMUSG00000038718	5
704	Down	GO:0002091	negative regulation of receptor internalization	5/1598	13/21087	0.001907595	0.021354771	0.0182545	ENSMUSG00000050148/ENSMUSG00000060780/ENSMUSG00000020886/ENSMUSG00000031837/ENSMUSG00000037907	5
705	Down	GO:0034764	positive regulation of transmembrane transport	31/1598	236/21087	0.001918554	0.021446985	0.018333327	ENSMUSG00000019146/ENSMUSG00000021313/ENSMUSG00000022623/ENSMUSG00000032011/ENSMUSG00000028756/ENSMUSG00000024065/ENSMUSG00000061603/ENSMUSG00000096146/ENSMUSG00000049422/ENSMUSG00000040136/ENSMUSG00000006930/ENSMUSG00000004035/ENSMUSG00000028854/ENSMUSG00000027030/ENSMUSG00000029361/ENSMUSG00000022602/ENSMUSG00000037989/ENSMUSG00000069601/ENSMUSG00000052374/ENSMUSG00000031633/ENSMUSG00000051331/…	31
706	Down	GO:0010243	response to organonitrogen compound	94/1598	923/21087	0.001975679	0.022054282	0.018852458	ENSMUSG00000017737/ENSMUSG00000024524/ENSMUSG00000050148/ENSMUSG00000031748/ENSMUSG00000034997/ENSMUSG00000030209/ENSMUSG00000006435/ENSMUSG00000035863/ENSMUSG00000023017/ENSMUSG00000020886/ENSMUSG00000022812/ENSMUSG00000022840/ENSMUSG00000021313/ENSMUSG00000019699/ENSMUSG00000018634/ENSMUSG00000028991/ENSMUSG00000053046/ENSMUSG00000006476/ENSMUSG00000055471/ENSMUSG00000039615/ENSMUSG00000051391/…	94
707	Down	GO:0006066	alcohol metabolic process	39/1598	318/21087	0.001999227	0.02227158	0.019038208	ENSMUSG00000036585/ENSMUSG00000035953/ENSMUSG00000042249/ENSMUSG00000025190/ENSMUSG00000021259/ENSMUSG00000045294/ENSMUSG00000033788/ENSMUSG00000022351/ENSMUSG00000034570/ENSMUSG00000063142/ENSMUSG00000032193/ENSMUSG00000059743/ENSMUSG00000034926/ENSMUSG00000028467/ENSMUSG00000020098/ENSMUSG00000026944/ENSMUSG00000027952/ENSMUSG00000006517/ENSMUSG00000041939/ENSMUSG00000093930/ENSMUSG00000022463/…	39
708	Down	GO:1902115	regulation of organelle assembly	28/1598	207/21087	0.002009708	0.02227158	0.019038208	ENSMUSG00000050148/ENSMUSG00000020366/ENSMUSG00000060780/ENSMUSG00000059146/ENSMUSG00000042700/ENSMUSG00000031654/ENSMUSG00000033862/ENSMUSG00000025582/ENSMUSG00000028756/ENSMUSG00000025656/ENSMUSG00000029512/ENSMUSG00000006930/ENSMUSG00000090100/ENSMUSG00000058230/ENSMUSG00000030397/ENSMUSG00000030600/ENSMUSG00000047388/ENSMUSG00000047085/ENSMUSG00000026792/ENSMUSG00000002055/ENSMUSG00000018707/…	28
709	Down	GO:0006835	dicarboxylic acid transport	14/1598	78/21087	0.002010439	0.02227158	0.019038208	ENSMUSG00000042429/ENSMUSG00000026797/ENSMUSG00000030209/ENSMUSG00000057531/ENSMUSG00000024897/ENSMUSG00000024462/ENSMUSG00000057880/ENSMUSG00000039059/ENSMUSG00000032532/ENSMUSG00000004902/ENSMUSG00000031105/ENSMUSG00000019082/ENSMUSG00000020805/ENSMUSG00000027010	14
710	Down	GO:0033108	mitochondrial respiratory chain complex assembly	14/1598	78/21087	0.002010439	0.02227158	0.019038208	ENSMUSG00000059734/ENSMUSG00000040048/ENSMUSG00000027384/ENSMUSG00000028982/ENSMUSG00000027673/ENSMUSG00000022437/ENSMUSG00000091780/ENSMUSG00000030869/ENSMUSG00000026260/ENSMUSG00000025204/ENSMUSG00000002379/ENSMUSG00000022354/ENSMUSG00000071014/ENSMUSG00000020153	14
711	Down	GO:0051966	regulation of synaptic transmission, glutamatergic	14/1598	78/21087	0.002010439	0.02227158	0.019038208	ENSMUSG00000042429/ENSMUSG00000022619/ENSMUSG00000034997/ENSMUSG00000026797/ENSMUSG00000019146/ENSMUSG00000005469/ENSMUSG00000022623/ENSMUSG00000019828/ENSMUSG00000051790/ENSMUSG00000057531/ENSMUSG00000041115/ENSMUSG00000030898/ENSMUSG00000063239/ENSMUSG00000038738	14
712	Down	GO:0009065	glutamine family amino acid catabolic process	7/1598	25/21087	0.002017753	0.02227158	0.019038208	ENSMUSG00000025190/ENSMUSG00000029361/ENSMUSG00000026103/ENSMUSG00000031672/ENSMUSG00000044005/ENSMUSG00000026787/ENSMUSG00000042096	7
713	Down	GO:0014048	regulation of glutamate secretion	7/1598	25/21087	0.002017753	0.02227158	0.019038208	ENSMUSG00000042429/ENSMUSG00000026797/ENSMUSG00000030209/ENSMUSG00000057531/ENSMUSG00000024462/ENSMUSG00000039059/ENSMUSG00000032532	7
714	Down	GO:0086019	cell-cell signaling involved in cardiac conduction	7/1598	25/21087	0.002017753	0.02227158	0.019038208	ENSMUSG00000021313/ENSMUSG00000019194/ENSMUSG00000051331/ENSMUSG00000020866/ENSMUSG00000032338/ENSMUSG00000046480/ENSMUSG00000049281	7
715	Down	GO:0008015	blood circulation	55/1598	488/21087	0.002029256	0.022367222	0.019119965	ENSMUSG00000042429/ENSMUSG00000027584/ENSMUSG00000031748/ENSMUSG00000034997/ENSMUSG00000019997/ENSMUSG00000021313/ENSMUSG00000037010/ENSMUSG00000028991/ENSMUSG00000024962/ENSMUSG00000030669/ENSMUSG00000047632/ENSMUSG00000024858/ENSMUSG00000024065/ENSMUSG00000030098/ENSMUSG00000061603/ENSMUSG00000028988/ENSMUSG00000021647/ENSMUSG00000021194/ENSMUSG00000020635/ENSMUSG00000057177/ENSMUSG00000040136/…	55
716	Down	GO:0090087	regulation of peptide transport	82/1598	788/21087	0.002077187	0.022863557	0.019544243	ENSMUSG00000020891/ENSMUSG00000042429/ENSMUSG00000047507/ENSMUSG00000021684/ENSMUSG00000048895/ENSMUSG00000037012/ENSMUSG00000021816/ENSMUSG00000058441/ENSMUSG00000005469/ENSMUSG00000022812/ENSMUSG00000025499/ENSMUSG00000022840/ENSMUSG00000024743/ENSMUSG00000020657/ENSMUSG00000037010/ENSMUSG00000029073/ENSMUSG00000053046/ENSMUSG00000051343/ENSMUSG00000040794/ENSMUSG00000028756/ENSMUSG00000054459/…	82
717	Down	GO:0086001	cardiac muscle cell action potential	11/1598	54/21087	0.002102735	0.023112484	0.01975703	ENSMUSG00000021313/ENSMUSG00000069601/ENSMUSG00000019194/ENSMUSG00000051331/ENSMUSG00000038319/ENSMUSG00000020866/ENSMUSG00000032338/ENSMUSG00000070304/ENSMUSG00000064329/ENSMUSG00000046480/ENSMUSG00000049281	11
718	Down	GO:0001975	response to amphetamine	6/1598	19/21087	0.002151343	0.023548242	0.020129525	ENSMUSG00000024524/ENSMUSG00000023017/ENSMUSG00000026959/ENSMUSG00000050541/ENSMUSG00000025630/ENSMUSG00000022489	6
719	Down	GO:0015740	C4-dicarboxylate transport	6/1598	19/21087	0.002151343	0.023548242	0.020129525	ENSMUSG00000057880/ENSMUSG00000004902/ENSMUSG00000031105/ENSMUSG00000019082/ENSMUSG00000020805/ENSMUSG00000027010	6
720	Down	GO:0097091	synaptic vesicle clustering	6/1598	19/21087	0.002151343	0.023548242	0.020129525	ENSMUSG00000031840/ENSMUSG00000051790/ENSMUSG00000037217/ENSMUSG00000009394/ENSMUSG00000033419/ENSMUSG00000074736	6
721	Down	GO:0046165	alcohol biosynthetic process	21/1598	141/21087	0.002179233	0.023820438	0.020362204	ENSMUSG00000036585/ENSMUSG00000025190/ENSMUSG00000045294/ENSMUSG00000059743/ENSMUSG00000034926/ENSMUSG00000020098/ENSMUSG00000027952/ENSMUSG00000006517/ENSMUSG00000041939/ENSMUSG00000093930/ENSMUSG00000029055/ENSMUSG00000001467/ENSMUSG00000012117/ENSMUSG00000021252/ENSMUSG00000033526/ENSMUSG00000040648/ENSMUSG00000032594/ENSMUSG00000043445/ENSMUSG00000032018/ENSMUSG00000024799/ENSMUSG00000058454	21
722	Down	GO:0008654	phospholipid biosynthetic process	23/1598	160/21087	0.002217048	0.024200219	0.020686849	ENSMUSG00000034997/ENSMUSG00000032883/ENSMUSG00000048486/ENSMUSG00000020333/ENSMUSG00000034902/ENSMUSG00000059743/ENSMUSG00000033628/ENSMUSG00000025178/ENSMUSG00000029330/ENSMUSG00000027952/ENSMUSG00000006517/ENSMUSG00000041939/ENSMUSG00000093930/ENSMUSG00000012117/ENSMUSG00000045625/ENSMUSG00000027134/ENSMUSG00000025137/ENSMUSG00000024892/ENSMUSG00000030275/ENSMUSG00000024867/ENSMUSG00000058793/…	23
723	Down	GO:0007015	actin filament organization	47/1598	404/21087	0.002220784	0.02420747	0.020693047	ENSMUSG00000019997/ENSMUSG00000022623/ENSMUSG00000028991/ENSMUSG00000026697/ENSMUSG00000074238/ENSMUSG00000030685/ENSMUSG00000050357/ENSMUSG00000045038/ENSMUSG00000027805/ENSMUSG00000030043/ENSMUSG00000038976/ENSMUSG00000032232/ENSMUSG00000022099/ENSMUSG00000058230/ENSMUSG00000032827/ENSMUSG00000038738/ENSMUSG00000029674/ENSMUSG00000046442/ENSMUSG00000054855/ENSMUSG00000024501/ENSMUSG00000030000/…	47
724	Down	GO:0051258	protein polymerization	35/1598	279/21087	0.00226474	0.024652507	0.021073474	ENSMUSG00000028991/ENSMUSG00000074238/ENSMUSG00000050357/ENSMUSG00000045038/ENSMUSG00000027805/ENSMUSG00000029203/ENSMUSG00000022099/ENSMUSG00000032827/ENSMUSG00000030000/ENSMUSG00000015599/ENSMUSG00000062591/ENSMUSG00000030357/ENSMUSG00000031865/ENSMUSG00000034295/ENSMUSG00000010154/ENSMUSG00000034570/ENSMUSG00000056367/ENSMUSG00000018736/ENSMUSG00000064302/ENSMUSG00000015222/ENSMUSG00000021061/…	35
725	Down	GO:0051881	regulation of mitochondrial membrane potential	14/1598	79/21087	0.002276485	0.024746175	0.021153543	ENSMUSG00000022812/ENSMUSG00000078566/ENSMUSG00000026697/ENSMUSG00000028756/ENSMUSG00000045038/ENSMUSG00000025190/ENSMUSG00000006818/ENSMUSG00000054428/ENSMUSG00000053192/ENSMUSG00000028982/ENSMUSG00000006057/ENSMUSG00000032532/ENSMUSG00000023912/ENSMUSG00000028013	14
726	Down	GO:0008637	apoptotic mitochondrial changes	18/1598	114/21087	0.002281274	0.024764078	0.021168847	ENSMUSG00000017737/ENSMUSG00000017897/ENSMUSG00000020366/ENSMUSG00000022812/ENSMUSG00000078566/ENSMUSG00000025582/ENSMUSG00000028756/ENSMUSG00000049422/ENSMUSG00000057177/ENSMUSG00000006818/ENSMUSG00000054428/ENSMUSG00000038412/ENSMUSG00000053192/ENSMUSG00000031155/ENSMUSG00000024500/ENSMUSG00000031633/ENSMUSG00000032532/ENSMUSG00000025733	18
727	Down	GO:0001558	regulation of cell growth	50/1598	437/21087	0.002321728	0.025168555	0.021514602	ENSMUSG00000048895/ENSMUSG00000041670/ENSMUSG00000059146/ENSMUSG00000039953/ENSMUSG00000022812/ENSMUSG00000030731/ENSMUSG00000038264/ENSMUSG00000028991/ENSMUSG00000033618/ENSMUSG00000051149/ENSMUSG00000061603/ENSMUSG00000032187/ENSMUSG00000031548/ENSMUSG00000057177/ENSMUSG00000029512/ENSMUSG00000038976/ENSMUSG00000028854/ENSMUSG00000008153/ENSMUSG00000039313/ENSMUSG00000026452/ENSMUSG00000078794/…	50
728	Down	GO:0006468	protein phosphorylation	173/1598	1859/21087	0.002325342	0.025173106	0.021518493	ENSMUSG00000017737/ENSMUSG00000036585/ENSMUSG00000042429/ENSMUSG00000027223/ENSMUSG00000022619/ENSMUSG00000034997/ENSMUSG00000048895/ENSMUSG00000000296/ENSMUSG00000037012/ENSMUSG00000019428/ENSMUSG00000030209/ENSMUSG00000057897/ENSMUSG00000042249/ENSMUSG00000021816/ENSMUSG00000025151/ENSMUSG00000029167/ENSMUSG00000020366/ENSMUSG00000032601/ENSMUSG00000059146/ENSMUSG00000032537/ENSMUSG00000006435/…	173
729	Down	GO:1903522	regulation of blood circulation	31/1598	239/21087	0.002339977	0.025296784	0.021624215	ENSMUSG00000042429/ENSMUSG00000031748/ENSMUSG00000034997/ENSMUSG00000019997/ENSMUSG00000021313/ENSMUSG00000037010/ENSMUSG00000030669/ENSMUSG00000024858/ENSMUSG00000024065/ENSMUSG00000061603/ENSMUSG00000021194/ENSMUSG00000020635/ENSMUSG00000057177/ENSMUSG00000030043/ENSMUSG00000028854/ENSMUSG00000028963/ENSMUSG00000029361/ENSMUSG00000050541/ENSMUSG00000010066/ENSMUSG00000025579/ENSMUSG00000019194/…	31
730	Down	GO:0008037	cell recognition	20/1598	133/21087	0.002443371	0.02637837	0.022548777	ENSMUSG00000032336/ENSMUSG00000048895/ENSMUSG00000032537/ENSMUSG00000011877/ENSMUSG00000034730/ENSMUSG00000022883/ENSMUSG00000058230/ENSMUSG00000068039/ENSMUSG00000003341/ENSMUSG00000039103/ENSMUSG00000042401/ENSMUSG00000023473/ENSMUSG00000039419/ENSMUSG00000033585/ENSMUSG00000050947/ENSMUSG00000002190/ENSMUSG00000050272/ENSMUSG00000037843/ENSMUSG00000030695/ENSMUSG00000026811	20
731	Down	GO:0034766	negative regulation of ion transmembrane transport	17/1598	106/21087	0.002516234	0.027127828	0.02318943	ENSMUSG00000017737/ENSMUSG00000027584/ENSMUSG00000018634/ENSMUSG00000028991/ENSMUSG00000045038/ENSMUSG00000020635/ENSMUSG00000004035/ENSMUSG00000027030/ENSMUSG00000029361/ENSMUSG00000069601/ENSMUSG00000033788/ENSMUSG00000052374/ENSMUSG00000038319/ENSMUSG00000028136/ENSMUSG00000025825/ENSMUSG00000035640/ENSMUSG00000027827	17
732	Down	GO:0051480	regulation of cytosolic calcium ion concentration	44/1598	375/21087	0.002561876	0.027582167	0.023577808	ENSMUSG00000027584/ENSMUSG00000034997/ENSMUSG00000030209/ENSMUSG00000003657/ENSMUSG00000020734/ENSMUSG00000020886/ENSMUSG00000022840/ENSMUSG00000021313/ENSMUSG00000030666/ENSMUSG00000018634/ENSMUSG00000019828/ENSMUSG00000030669/ENSMUSG00000032011/ENSMUSG00000061603/ENSMUSG00000049551/ENSMUSG00000045038/ENSMUSG00000021194/ENSMUSG00000020635/ENSMUSG00000025190/ENSMUSG00000025318/ENSMUSG00000079055/…	44
733	Down	GO:1902117	positive regulation of organelle assembly	14/1598	80/21087	0.002570923	0.027641804	0.023628787	ENSMUSG00000020366/ENSMUSG00000029512/ENSMUSG00000006930/ENSMUSG00000090100/ENSMUSG00000058230/ENSMUSG00000030397/ENSMUSG00000047388/ENSMUSG00000026792/ENSMUSG00000002055/ENSMUSG00000018707/ENSMUSG00000033287/ENSMUSG00000018547/ENSMUSG00000042156/ENSMUSG00000031157	14
734	Down	GO:0021533	cell differentiation in hindbrain	7/1598	26/21087	0.002582744	0.027731075	0.023705097	ENSMUSG00000031654/ENSMUSG00000029512/ENSMUSG00000023011/ENSMUSG00000030302/ENSMUSG00000034656/ENSMUSG00000066129/ENSMUSG00000060240	7
735	Down	GO:0019722	calcium-mediated signaling	28/1598	211/21087	0.002663115	0.028555117	0.024409506	ENSMUSG00000021816/ENSMUSG00000022812/ENSMUSG00000021313/ENSMUSG00000028991/ENSMUSG00000019828/ENSMUSG00000038967/ENSMUSG00000061603/ENSMUSG00000025813/ENSMUSG00000028161/ENSMUSG00000013033/ENSMUSG00000020635/ENSMUSG00000025318/ENSMUSG00000006930/ENSMUSG00000009292/ENSMUSG00000038976/ENSMUSG00000004035/ENSMUSG00000028854/ENSMUSG00000008136/ENSMUSG00000022099/ENSMUSG00000032827/ENSMUSG00000062991/…	28
736	Down	GO:0006084	acetyl-CoA metabolic process	8/1598	33/21087	0.002674519	0.028560821	0.024414381	ENSMUSG00000038967/ENSMUSG00000025153/ENSMUSG00000027952/ENSMUSG00000006517/ENSMUSG00000041939/ENSMUSG00000005683/ENSMUSG00000093930/ENSMUSG00000020917	8
737	Down	GO:0086091	regulation of heart rate by cardiac conduction	8/1598	33/21087	0.002674519	0.028560821	0.024414381	ENSMUSG00000019194/ENSMUSG00000051331/ENSMUSG00000038319/ENSMUSG00000020866/ENSMUSG00000032338/ENSMUSG00000070304/ENSMUSG00000046480/ENSMUSG00000049281	8
738	Down	GO:1903146	regulation of autophagy of mitochondrion	8/1598	33/21087	0.002674519	0.028560821	0.024414381	ENSMUSG00000078566/ENSMUSG00000019471/ENSMUSG00000028756/ENSMUSG00000057177/ENSMUSG00000054428/ENSMUSG00000028086/ENSMUSG00000038028/ENSMUSG00000020402	8
739	Down	GO:0051955	regulation of amino acid transport	10/1598	48/21087	0.002777548	0.029603922	0.025306046	ENSMUSG00000042429/ENSMUSG00000026797/ENSMUSG00000030209/ENSMUSG00000030310/ENSMUSG00000057531/ENSMUSG00000024462/ENSMUSG00000057880/ENSMUSG00000039059/ENSMUSG00000038486/ENSMUSG00000032532	10
740	Down	GO:0021694	cerebellar Purkinje cell layer formation	5/1598	14/21087	0.002783467	0.029603922	0.025306046	ENSMUSG00000023011/ENSMUSG00000030302/ENSMUSG00000034656/ENSMUSG00000039137/ENSMUSG00000060240	5
741	Down	GO:0030949	positive regulation of vascular endothelial growth factor receptor signaling pathway	5/1598	14/21087	0.002783467	0.029603922	0.025306046	ENSMUSG00000021974/ENSMUSG00000024962/ENSMUSG00000057967/ENSMUSG00000020176/ENSMUSG00000023951	5
742	Down	GO:0070201	regulation of establishment of protein localization	80/1598	774/21087	0.002801945	0.029760282	0.025439706	ENSMUSG00000020891/ENSMUSG00000047507/ENSMUSG00000021684/ENSMUSG00000048895/ENSMUSG00000037012/ENSMUSG00000021816/ENSMUSG00000058441/ENSMUSG00000005469/ENSMUSG00000022812/ENSMUSG00000025499/ENSMUSG00000022840/ENSMUSG00000024743/ENSMUSG00000020657/ENSMUSG00000029073/ENSMUSG00000053046/ENSMUSG00000051343/ENSMUSG00000040794/ENSMUSG00000028756/ENSMUSG00000054459/ENSMUSG00000028445/ENSMUSG00000042817/…	80
743	Down	GO:0060999	positive regulation of dendritic spine development	12/1598	64/21087	0.002813591	0.029843757	0.025511062	ENSMUSG00000057897/ENSMUSG00000006435/ENSMUSG00000035863/ENSMUSG00000022623/ENSMUSG00000028991/ENSMUSG00000042589/ENSMUSG00000051790/ENSMUSG00000025920/ENSMUSG00000032827/ENSMUSG00000062991/ENSMUSG00000038738/ENSMUSG00000042688	12
744	Down	GO:0006470	protein dephosphorylation	31/1598	242/21087	0.002838452	0.030066985	0.025701881	ENSMUSG00000042429/ENSMUSG00000017897/ENSMUSG00000021816/ENSMUSG00000024777/ENSMUSG00000037887/ENSMUSG00000006476/ENSMUSG00000028756/ENSMUSG00000069255/ENSMUSG00000028161/ENSMUSG00000030854/ENSMUSG00000020635/ENSMUSG00000038976/ENSMUSG00000007564/ENSMUSG00000036398/ENSMUSG00000018326/ENSMUSG00000042662/ENSMUSG00000068742/ENSMUSG00000014592/ENSMUSG00000046442/ENSMUSG00000039515/ENSMUSG00000024500/…	31
745	Down	GO:0042596	fear response	11/1598	56/21087	0.002845992	0.030106398	0.025735573	ENSMUSG00000021684/ENSMUSG00000022619/ENSMUSG00000030209/ENSMUSG00000023017/ENSMUSG00000022623/ENSMUSG00000018634/ENSMUSG00000030898/ENSMUSG00000032532/ENSMUSG00000020402/ENSMUSG00000028351/ENSMUSG00000055078	11
746	Down	GO:1901564	organonitrogen compound metabolic process	513/1598	6122/21087	0.002866873	0.030286627	0.025889636	ENSMUSG00000017737/ENSMUSG00000036585/ENSMUSG00000042429/ENSMUSG00000033208/ENSMUSG00000050148/ENSMUSG00000027223/ENSMUSG00000028546/ENSMUSG00000022619/ENSMUSG00000017897/ENSMUSG00000034997/ENSMUSG00000048895/ENSMUSG00000000296/ENSMUSG00000037012/ENSMUSG00000019428/ENSMUSG00000030209/ENSMUSG00000001366/ENSMUSG00000057897/ENSMUSG00000042249/ENSMUSG00000020734/ENSMUSG00000021816/ENSMUSG00000025151/…	513
747	Down	GO:0014075	response to amine	6/1598	20/21087	0.002878333	0.03032639	0.025923626	ENSMUSG00000024524/ENSMUSG00000023017/ENSMUSG00000026959/ENSMUSG00000050541/ENSMUSG00000025630/ENSMUSG00000022489	6
748	Down	GO:0033605	positive regulation of catecholamine secretion	6/1598	20/21087	0.002878333	0.03032639	0.025923626	ENSMUSG00000027577/ENSMUSG00000090223/ENSMUSG00000028756/ENSMUSG00000024858/ENSMUSG00000021647/ENSMUSG00000050556	6
749	Down	GO:0043549	regulation of kinase activity	80/1598	775/21087	0.002899334	0.030506876	0.02607791	ENSMUSG00000036585/ENSMUSG00000042429/ENSMUSG00000027223/ENSMUSG00000034997/ENSMUSG00000048895/ENSMUSG00000000296/ENSMUSG00000025151/ENSMUSG00000032601/ENSMUSG00000059146/ENSMUSG00000006435/ENSMUSG00000059981/ENSMUSG00000024777/ENSMUSG00000020886/ENSMUSG00000022812/ENSMUSG00000025499/ENSMUSG00000029223/ENSMUSG00000024948/ENSMUSG00000037887/ENSMUSG00000019471/ENSMUSG00000028991/ENSMUSG00000008734/…	80
750	Down	GO:0051235	maintenance of location	39/1598	325/21087	0.002944069	0.030936281	0.026444974	ENSMUSG00000034997/ENSMUSG00000037012/ENSMUSG00000021313/ENSMUSG00000032011/ENSMUSG00000028756/ENSMUSG00000024858/ENSMUSG00000061603/ENSMUSG00000045038/ENSMUSG00000020635/ENSMUSG00000025318/ENSMUSG00000006930/ENSMUSG00000009292/ENSMUSG00000003378/ENSMUSG00000004035/ENSMUSG00000071657/ENSMUSG00000018326/ENSMUSG00000068742/ENSMUSG00000045294/ENSMUSG00000057455/ENSMUSG00000069601/ENSMUSG00000025579/…	39
751	Down	GO:0006937	regulation of muscle contraction	22/1598	154/21087	0.002952304	0.0309815	0.026483628	ENSMUSG00000042429/ENSMUSG00000019997/ENSMUSG00000021313/ENSMUSG00000030669/ENSMUSG00000024858/ENSMUSG00000024065/ENSMUSG00000061603/ENSMUSG00000021194/ENSMUSG00000020635/ENSMUSG00000079055/ENSMUSG00000030043/ENSMUSG00000028854/ENSMUSG00000057880/ENSMUSG00000050541/ENSMUSG00000071657/ENSMUSG00000051331/ENSMUSG00000063142/ENSMUSG00000047976/ENSMUSG00000018340/ENSMUSG00000032338/ENSMUSG00000026576/…	22
752	Down	GO:0043393	regulation of protein binding	31/1598	243/21087	0.003023594	0.031446712	0.026881301	ENSMUSG00000017737/ENSMUSG00000022812/ENSMUSG00000022855/ENSMUSG00000054196/ENSMUSG00000039615/ENSMUSG00000051149/ENSMUSG00000057615/ENSMUSG00000028988/ENSMUSG00000057531/ENSMUSG00000054452/ENSMUSG00000090100/ENSMUSG00000062995/ENSMUSG00000031155/ENSMUSG00000025266/ENSMUSG00000028975/ENSMUSG00000042401/ENSMUSG00000030000/ENSMUSG00000033788/ENSMUSG00000015599/ENSMUSG00000008855/ENSMUSG00000015222/…	31
753	Down	GO:0032328	alanine transport	4/1598	9/21087	0.003036537	0.031446712	0.026881301	ENSMUSG00000030495/ENSMUSG00000022462/ENSMUSG00000020261/ENSMUSG00000027894	4
754	Down	GO:0071871	response to epinephrine	4/1598	9/21087	0.003036537	0.031446712	0.026881301	ENSMUSG00000021313/ENSMUSG00000061603/ENSMUSG00000028854/ENSMUSG00000029361	4
755	Down	GO:0071872	cellular response to epinephrine stimulus	4/1598	9/21087	0.003036537	0.031446712	0.026881301	ENSMUSG00000021313/ENSMUSG00000061603/ENSMUSG00000028854/ENSMUSG00000029361	4
756	Down	GO:0086015	SA node cell action potential	4/1598	9/21087	0.003036537	0.031446712	0.026881301	ENSMUSG00000021313/ENSMUSG00000020866/ENSMUSG00000032338/ENSMUSG00000049281	4
757	Down	GO:0086018	SA node cell to atrial cardiac muscle cell signaling	4/1598	9/21087	0.003036537	0.031446712	0.026881301	ENSMUSG00000021313/ENSMUSG00000020866/ENSMUSG00000032338/ENSMUSG00000049281	4
758	Down	GO:0086070	SA node cell to atrial cardiac muscle cell communication	4/1598	9/21087	0.003036537	0.031446712	0.026881301	ENSMUSG00000021313/ENSMUSG00000020866/ENSMUSG00000032338/ENSMUSG00000049281	4
759	Down	GO:0099641	anterograde axonal protein transport	4/1598	9/21087	0.003036537	0.031446712	0.026881301	ENSMUSG00000027254/ENSMUSG00000024163/ENSMUSG00000052572/ENSMUSG00000074657	4
760	Down	GO:1904058	positive regulation of sensory perception of pain	4/1598	9/21087	0.003036537	0.031446712	0.026881301	ENSMUSG00000027584/ENSMUSG00000028991/ENSMUSG00000024858/ENSMUSG00000032532	4
761	Down	GO:1905383	protein localization to presynapse	4/1598	9/21087	0.003036537	0.031446712	0.026881301	ENSMUSG00000027254/ENSMUSG00000024163/ENSMUSG00000052572/ENSMUSG00000074657	4
762	Down	GO:0007009	plasma membrane organization	17/1598	108/21087	0.003077417	0.03182825	0.027207448	ENSMUSG00000031840/ENSMUSG00000024743/ENSMUSG00000027257/ENSMUSG00000033579/ENSMUSG00000069601/ENSMUSG00000033788/ENSMUSG00000070000/ENSMUSG00000019437/ENSMUSG00000021061/ENSMUSG00000028488/ENSMUSG00000040276/ENSMUSG00000020900/ENSMUSG00000024044/ENSMUSG00000074968/ENSMUSG00000035189/ENSMUSG00000028524/ENSMUSG00000018340	17
763	Down	GO:0051560	mitochondrial calcium ion homeostasis	7/1598	27/21087	0.003261749	0.033690487	0.028799326	ENSMUSG00000078566/ENSMUSG00000045038/ENSMUSG00000079055/ENSMUSG00000009647/ENSMUSG00000028149/ENSMUSG00000018340/ENSMUSG00000023912	7
764	Down	GO:0014047	glutamate secretion	8/1598	34/21087	0.003268768	0.033718802	0.02882353	ENSMUSG00000042429/ENSMUSG00000026797/ENSMUSG00000030209/ENSMUSG00000057531/ENSMUSG00000024897/ENSMUSG00000024462/ENSMUSG00000039059/ENSMUSG00000032532	8
765	Down	GO:0010817	regulation of hormone levels	60/1598	554/21087	0.00327432	0.03373192	0.028834744	ENSMUSG00000042429/ENSMUSG00000047507/ENSMUSG00000021684/ENSMUSG00000021816/ENSMUSG00000029167/ENSMUSG00000022840/ENSMUSG00000024743/ENSMUSG00000018634/ENSMUSG00000037010/ENSMUSG00000053046/ENSMUSG00000061393/ENSMUSG00000051343/ENSMUSG00000023328/ENSMUSG00000039615/ENSMUSG00000054459/ENSMUSG00000028445/ENSMUSG00000033615/ENSMUSG00000096146/ENSMUSG00000028161/ENSMUSG00000027273/ENSMUSG00000021647/…	60
766	Down	GO:0051223	regulation of protein transport	77/1598	745/21087	0.003328587	0.034246211	0.029274371	ENSMUSG00000020891/ENSMUSG00000047507/ENSMUSG00000021684/ENSMUSG00000048895/ENSMUSG00000037012/ENSMUSG00000021816/ENSMUSG00000058441/ENSMUSG00000005469/ENSMUSG00000022812/ENSMUSG00000025499/ENSMUSG00000022840/ENSMUSG00000024743/ENSMUSG00000020657/ENSMUSG00000029073/ENSMUSG00000053046/ENSMUSG00000051343/ENSMUSG00000040794/ENSMUSG00000028756/ENSMUSG00000054459/ENSMUSG00000028445/ENSMUSG00000042817/…	77
767	Down	GO:0098659	inorganic cation import across plasma membrane	15/1598	91/21087	0.003357192	0.034450559	0.029449052	ENSMUSG00000096146/ENSMUSG00000079055/ENSMUSG00000009292/ENSMUSG00000028854/ENSMUSG00000037989/ENSMUSG00000017740/ENSMUSG00000038319/ENSMUSG00000025825/ENSMUSG00000040907/ENSMUSG00000032338/ENSMUSG00000014786/ENSMUSG00000026576/ENSMUSG00000020331/ENSMUSG00000079157/ENSMUSG00000058743	15
768	Down	GO:0099587	inorganic ion import across plasma membrane	15/1598	91/21087	0.003357192	0.034450559	0.029449052	ENSMUSG00000096146/ENSMUSG00000079055/ENSMUSG00000009292/ENSMUSG00000028854/ENSMUSG00000037989/ENSMUSG00000017740/ENSMUSG00000038319/ENSMUSG00000025825/ENSMUSG00000040907/ENSMUSG00000032338/ENSMUSG00000014786/ENSMUSG00000026576/ENSMUSG00000020331/ENSMUSG00000079157/ENSMUSG00000058743	15
769	Down	GO:0006892	post-Golgi vesicle-mediated transport	16/1598	100/21087	0.00340011	0.034845605	0.029786745	ENSMUSG00000024127/ENSMUSG00000074238/ENSMUSG00000024065/ENSMUSG00000034187/ENSMUSG00000020894/ENSMUSG00000068747/ENSMUSG00000069601/ENSMUSG00000033769/ENSMUSG00000032883/ENSMUSG00000025035/ENSMUSG00000020198/ENSMUSG00000025224/ENSMUSG00000034973/ENSMUSG00000027799/ENSMUSG00000038949/ENSMUSG00000020740	16
770	Down	GO:0043949	regulation of cAMP-mediated signaling	30/1598	235/21087	0.003457084	0.035383484	0.030246535	ENSMUSG00000042429/ENSMUSG00000024524/ENSMUSG00000027584/ENSMUSG00000031748/ENSMUSG00000040133/ENSMUSG00000035863/ENSMUSG00000022840/ENSMUSG00000030666/ENSMUSG00000018634/ENSMUSG00000005580/ENSMUSG00000034730/ENSMUSG00000030669/ENSMUSG00000032177/ENSMUSG00000024858/ENSMUSG00000040009/ENSMUSG00000021194/ENSMUSG00000013033/ENSMUSG00000057177/ENSMUSG00000024462/ENSMUSG00000034472/ENSMUSG00000029361/…	30
771	Down	GO:0001666	response to hypoxia	27/1598	205/21087	0.003486369	0.035636931	0.030463187	ENSMUSG00000042429/ENSMUSG00000030209/ENSMUSG00000027577/ENSMUSG00000021313/ENSMUSG00000078566/ENSMUSG00000018634/ENSMUSG00000028991/ENSMUSG00000024962/ENSMUSG00000028756/ENSMUSG00000039615/ENSMUSG00000045038/ENSMUSG00000079055/ENSMUSG00000028854/ENSMUSG00000024039/ENSMUSG00000057880/ENSMUSG00000038412/ENSMUSG00000023951/ENSMUSG00000038028/ENSMUSG00000063142/ENSMUSG00000021820/ENSMUSG00000037624/…	27
772	Down	GO:0003013	circulatory system process	55/1598	501/21087	0.003568617	0.036430398	0.031141459	ENSMUSG00000042429/ENSMUSG00000027584/ENSMUSG00000031748/ENSMUSG00000034997/ENSMUSG00000019997/ENSMUSG00000021313/ENSMUSG00000037010/ENSMUSG00000028991/ENSMUSG00000024962/ENSMUSG00000030669/ENSMUSG00000047632/ENSMUSG00000024858/ENSMUSG00000024065/ENSMUSG00000030098/ENSMUSG00000061603/ENSMUSG00000028988/ENSMUSG00000021647/ENSMUSG00000021194/ENSMUSG00000020635/ENSMUSG00000057177/ENSMUSG00000040136/…	55
773	Down	GO:0010876	lipid localization	44/1598	382/21087	0.003620568	0.036912936	0.031553942	ENSMUSG00000020366/ENSMUSG00000030688/ENSMUSG00000024743/ENSMUSG00000018634/ENSMUSG00000029073/ENSMUSG00000021466/ENSMUSG00000071657/ENSMUSG00000068742/ENSMUSG00000003341/ENSMUSG00000033788/ENSMUSG00000032883/ENSMUSG00000022351/ENSMUSG00000021983/ENSMUSG00000048486/ENSMUSG00000021669/ENSMUSG00000036078/ENSMUSG00000020333/ENSMUSG00000028125/ENSMUSG00000027546/ENSMUSG00000032193/ENSMUSG00000017781/…	44
774	Down	GO:0042220	response to cocaine	9/1598	42/21087	0.003650565	0.037122713	0.031733265	ENSMUSG00000034997/ENSMUSG00000020886/ENSMUSG00000018634/ENSMUSG00000028991/ENSMUSG00000025813/ENSMUSG00000029361/ENSMUSG00000057880/ENSMUSG00000050541/ENSMUSG00000008855	9
775	Down	GO:0097484	dendrite extension	9/1598	42/21087	0.003650565	0.037122713	0.031733265	ENSMUSG00000041670/ENSMUSG00000030731/ENSMUSG00000029673/ENSMUSG00000020340/ENSMUSG00000026452/ENSMUSG00000022212/ENSMUSG00000028488/ENSMUSG00000024008/ENSMUSG00000052949	9
776	Down	GO:0000422	autophagy of mitochondrion	12/1598	66/21087	0.003667058	0.037146636	0.031753714	ENSMUSG00000078566/ENSMUSG00000019471/ENSMUSG00000028756/ENSMUSG00000057177/ENSMUSG00000029512/ENSMUSG00000054428/ENSMUSG00000028086/ENSMUSG00000033124/ENSMUSG00000038028/ENSMUSG00000020402/ENSMUSG00000027602/ENSMUSG00000030161	12
777	Down	GO:0061726	mitochondrion disassembly	12/1598	66/21087	0.003667058	0.037146636	0.031753714	ENSMUSG00000078566/ENSMUSG00000019471/ENSMUSG00000028756/ENSMUSG00000057177/ENSMUSG00000029512/ENSMUSG00000054428/ENSMUSG00000028086/ENSMUSG00000033124/ENSMUSG00000038028/ENSMUSG00000020402/ENSMUSG00000027602/ENSMUSG00000030161	12
778	Down	GO:0086003	cardiac muscle cell contraction	12/1598	66/21087	0.003667058	0.037146636	0.031753714	ENSMUSG00000042429/ENSMUSG00000021313/ENSMUSG00000061603/ENSMUSG00000019194/ENSMUSG00000051331/ENSMUSG00000038319/ENSMUSG00000020866/ENSMUSG00000032338/ENSMUSG00000070304/ENSMUSG00000064329/ENSMUSG00000046480/ENSMUSG00000049281	12
779	Down	GO:1904375	regulation of protein localization to cell periphery	20/1598	138/21087	0.003775922	0.038200309	0.032654416	ENSMUSG00000019146/ENSMUSG00000057897/ENSMUSG00000022812/ENSMUSG00000025499/ENSMUSG00000021567/ENSMUSG00000096146/ENSMUSG00000001507/ENSMUSG00000030805/ENSMUSG00000033389/ENSMUSG00000038976/ENSMUSG00000041115/ENSMUSG00000029053/ENSMUSG00000032883/ENSMUSG00000031153/ENSMUSG00000021820/ENSMUSG00000022841/ENSMUSG00000013921/ENSMUSG00000017400/ENSMUSG00000061576/ENSMUSG00000038949	20
780	Down	GO:0045744	negative regulation of G protein-coupled receptor signaling pathway	11/1598	58/21087	0.003787416	0.038267465	0.032711822	ENSMUSG00000050148/ENSMUSG00000027584/ENSMUSG00000026825/ENSMUSG00000057897/ENSMUSG00000042249/ENSMUSG00000037010/ENSMUSG00000024858/ENSMUSG00000031837/ENSMUSG00000018326/ENSMUSG00000043384/ENSMUSG00000006651	11
781	Down	GO:0006101	citrate metabolic process	3/1598	5/21087	0.003866349	0.03837619	0.032804762	ENSMUSG00000005683/ENSMUSG00000020917/ENSMUSG00000022477	3
782	Down	GO:0006538	glutamate catabolic process	3/1598	5/21087	0.003866349	0.03837619	0.032804762	ENSMUSG00000025190/ENSMUSG00000031672/ENSMUSG00000026787	3
783	Down	GO:0009240	isopentenyl diphosphate biosynthetic process	3/1598	5/21087	0.003866349	0.03837619	0.032804762	ENSMUSG00000027952/ENSMUSG00000006517/ENSMUSG00000041939	3
784	Down	GO:0031581	hemidesmosome assembly	3/1598	5/21087	0.003866349	0.03837619	0.032804762	ENSMUSG00000026131/ENSMUSG00000020758/ENSMUSG00000022565	3
785	Down	GO:0031632	positive regulation of synaptic vesicle fusion to presynaptic active zone membrane	3/1598	5/21087	0.003866349	0.03837619	0.032804762	ENSMUSG00000024743/ENSMUSG00000045114/ENSMUSG00000026452	3
786	Down	GO:0043490	malate-aspartate shuttle	3/1598	5/21087	0.003866349	0.03837619	0.032804762	ENSMUSG00000004902/ENSMUSG00000019082/ENSMUSG00000027010	3
787	Down	GO:0046490	isopentenyl diphosphate metabolic process	3/1598	5/21087	0.003866349	0.03837619	0.032804762	ENSMUSG00000027952/ENSMUSG00000006517/ENSMUSG00000041939	3
788	Down	GO:0060083	smooth muscle contraction involved in micturition	3/1598	5/21087	0.003866349	0.03837619	0.032804762	ENSMUSG00000030043/ENSMUSG00000051331/ENSMUSG00000063142	3
789	Down	GO:0071205	protein localization to juxtaparanode region of axon	3/1598	5/21087	0.003866349	0.03837619	0.032804762	ENSMUSG00000017167/ENSMUSG00000039419/ENSMUSG00000024044	3
790	Down	GO:0090677	reversible differentiation	3/1598	5/21087	0.003866349	0.03837619	0.032804762	ENSMUSG00000021974/ENSMUSG00000006818/ENSMUSG00000032172	3
791	Down	GO:0098735	positive regulation of the force of heart contraction	3/1598	5/21087	0.003866349	0.03837619	0.032804762	ENSMUSG00000021313/ENSMUSG00000028854/ENSMUSG00000029361	3
792	Down	GO:0099502	calcium-dependent activation of synaptic vesicle fusion	3/1598	5/21087	0.003866349	0.03837619	0.032804762	ENSMUSG00000024743/ENSMUSG00000045114/ENSMUSG00000026452	3
793	Down	GO:1902816	regulation of protein localization to microtubule	3/1598	5/21087	0.003866349	0.03837619	0.032804762	ENSMUSG00000027254/ENSMUSG00000090100/ENSMUSG00000003346	3
794	Down	GO:1902817	negative regulation of protein localization to microtubule	3/1598	5/21087	0.003866349	0.03837619	0.032804762	ENSMUSG00000027254/ENSMUSG00000090100/ENSMUSG00000003346	3
795	Down	GO:0014049	positive regulation of glutamate secretion	5/1598	15/21087	0.003916993	0.038732523	0.033109364	ENSMUSG00000026797/ENSMUSG00000030209/ENSMUSG00000057531/ENSMUSG00000024462/ENSMUSG00000032532	5
796	Down	GO:0098962	regulation of postsynaptic neurotransmitter receptor activity	5/1598	15/21087	0.003916993	0.038732523	0.033109364	ENSMUSG00000027577/ENSMUSG00000025582/ENSMUSG00000059991/ENSMUSG00000024873/ENSMUSG00000040867	5
797	Down	GO:2000369	regulation of clathrin-dependent endocytosis	5/1598	15/21087	0.003916993	0.038732523	0.033109364	ENSMUSG00000050148/ENSMUSG00000022791/ENSMUSG00000033419/ENSMUSG00000028488/ENSMUSG00000028528	5
798	Down	GO:1901617	organic hydroxy compound biosynthetic process	29/1598	227/21087	0.003953751	0.039047011	0.033378194	ENSMUSG00000036585/ENSMUSG00000001666/ENSMUSG00000025190/ENSMUSG00000045294/ENSMUSG00000022351/ENSMUSG00000059743/ENSMUSG00000034926/ENSMUSG00000020098/ENSMUSG00000027952/ENSMUSG00000006517/ENSMUSG00000041939/ENSMUSG00000093930/ENSMUSG00000029055/ENSMUSG00000001467/ENSMUSG00000024378/ENSMUSG00000027359/ENSMUSG00000012117/ENSMUSG00000030246/ENSMUSG00000021252/ENSMUSG00000033526/ENSMUSG00000032788/…	29
799	Down	GO:2000171	negative regulation of dendrite development	8/1598	35/21087	0.003960567	0.039065367	0.033393885	ENSMUSG00000022812/ENSMUSG00000028161/ENSMUSG00000000632/ENSMUSG00000057531/ENSMUSG00000057177/ENSMUSG00000029516/ENSMUSG00000040265/ENSMUSG00000006711	8
800	Down	GO:0002029	desensitization of G protein-coupled receptor signaling pathway	7/1598	28/21087	0.004068802	0.03988337	0.034093131	ENSMUSG00000050148/ENSMUSG00000026825/ENSMUSG00000057897/ENSMUSG00000042249/ENSMUSG00000037010/ENSMUSG00000024858/ENSMUSG00000031837	7
801	Down	GO:0021952	central nervous system projection neuron axonogenesis	7/1598	28/21087	0.004068802	0.03988337	0.034093131	ENSMUSG00000032537/ENSMUSG00000033253/ENSMUSG00000019194/ENSMUSG00000011751/ENSMUSG00000020262/ENSMUSG00000033004/ENSMUSG00000027797	7
802	Down	GO:0022401	negative adaptation of signaling pathway	7/1598	28/21087	0.004068802	0.03988337	0.034093131	ENSMUSG00000050148/ENSMUSG00000026825/ENSMUSG00000057897/ENSMUSG00000042249/ENSMUSG00000037010/ENSMUSG00000024858/ENSMUSG00000031837	7
803	Down	GO:0051957	positive regulation of amino acid transport	7/1598	28/21087	0.004068802	0.03988337	0.034093131	ENSMUSG00000026797/ENSMUSG00000030209/ENSMUSG00000030310/ENSMUSG00000057531/ENSMUSG00000024462/ENSMUSG00000057880/ENSMUSG00000032532	7
804	Down	GO:2000311	regulation of AMPA receptor activity	7/1598	28/21087	0.004068802	0.03988337	0.034093131	ENSMUSG00000022619/ENSMUSG00000019146/ENSMUSG00000022623/ENSMUSG00000024873/ENSMUSG00000051790/ENSMUSG00000022602/ENSMUSG00000038738	7
805	Down	GO:0002027	regulation of heart rate	15/1598	93/21087	0.004150471	0.040633367	0.034734244	ENSMUSG00000021313/ENSMUSG00000030669/ENSMUSG00000020635/ENSMUSG00000028963/ENSMUSG00000050541/ENSMUSG00000019194/ENSMUSG00000051331/ENSMUSG00000011751/ENSMUSG00000038319/ENSMUSG00000020866/ENSMUSG00000032338/ENSMUSG00000070304/ENSMUSG00000046480/ENSMUSG00000049281/ENSMUSG00000053093	15
806	Down	GO:0018193	peptidyl-amino acid modification	111/1598	1146/21087	0.004229818	0.041358799	0.035354358	ENSMUSG00000042429/ENSMUSG00000034997/ENSMUSG00000048895/ENSMUSG00000037012/ENSMUSG00000057897/ENSMUSG00000020366/ENSMUSG00000005045/ENSMUSG00000059146/ENSMUSG00000006435/ENSMUSG00000005469/ENSMUSG00000024777/ENSMUSG00000020886/ENSMUSG00000022812/ENSMUSG00000022855/ENSMUSG00000029673/ENSMUSG00000019699/ENSMUSG00000028991/ENSMUSG00000053046/ENSMUSG00000008734/ENSMUSG00000024962/ENSMUSG00000003345/…	111
807	Down	GO:0032271	regulation of protein polymerization	28/1598	218/21087	0.004243177	0.041438015	0.035422074	ENSMUSG00000028991/ENSMUSG00000074238/ENSMUSG00000050357/ENSMUSG00000045038/ENSMUSG00000027805/ENSMUSG00000022099/ENSMUSG00000032827/ENSMUSG00000030000/ENSMUSG00000015599/ENSMUSG00000062591/ENSMUSG00000030357/ENSMUSG00000031865/ENSMUSG00000034295/ENSMUSG00000010154/ENSMUSG00000034570/ENSMUSG00000056367/ENSMUSG00000015222/ENSMUSG00000021061/ENSMUSG00000040811/ENSMUSG00000035407/ENSMUSG00000044433/…	28
808	Down	GO:0045927	positive regulation of growth	37/1598	311/21087	0.004273437	0.041681881	0.035630536	ENSMUSG00000025407/ENSMUSG00000041670/ENSMUSG00000059146/ENSMUSG00000022812/ENSMUSG00000030731/ENSMUSG00000038264/ENSMUSG00000028991/ENSMUSG00000021974/ENSMUSG00000033618/ENSMUSG00000051149/ENSMUSG00000061603/ENSMUSG00000042817/ENSMUSG00000031548/ENSMUSG00000028854/ENSMUSG00000026452/ENSMUSG00000062991/ENSMUSG00000023951/ENSMUSG00000010066/ENSMUSG00000029674/ENSMUSG00000022212/ENSMUSG00000028982/…	37
809	Down	GO:0007212	dopamine receptor signaling pathway	9/1598	43/21087	0.004312314	0.041957213	0.035865895	ENSMUSG00000024524/ENSMUSG00000031748/ENSMUSG00000035863/ENSMUSG00000022840/ENSMUSG00000055471/ENSMUSG00000029126/ENSMUSG00000057531/ENSMUSG00000025468/ENSMUSG00000020297	9
810	Down	GO:0086002	cardiac muscle cell action potential involved in contraction	9/1598	43/21087	0.004312314	0.041957213	0.035865895	ENSMUSG00000021313/ENSMUSG00000019194/ENSMUSG00000051331/ENSMUSG00000038319/ENSMUSG00000020866/ENSMUSG00000070304/ENSMUSG00000064329/ENSMUSG00000046480/ENSMUSG00000049281	9
811	Down	GO:0046717	acid secretion	18/1598	121/21087	0.004402615	0.042730305	0.03652675	ENSMUSG00000042429/ENSMUSG00000027584/ENSMUSG00000028542/ENSMUSG00000026797/ENSMUSG00000030209/ENSMUSG00000020366/ENSMUSG00000030688/ENSMUSG00000030310/ENSMUSG00000057531/ENSMUSG00000024897/ENSMUSG00000024462/ENSMUSG00000057880/ENSMUSG00000030898/ENSMUSG00000039059/ENSMUSG00000034656/ENSMUSG00000038486/ENSMUSG00000032532/ENSMUSG00000020681	18
812	Down	GO:1901216	positive regulation of neuron death	18/1598	121/21087	0.004402615	0.042730305	0.03652675	ENSMUSG00000042429/ENSMUSG00000048895/ENSMUSG00000030209/ENSMUSG00000022812/ENSMUSG00000028991/ENSMUSG00000030854/ENSMUSG00000057177/ENSMUSG00000009292/ENSMUSG00000003378/ENSMUSG00000033352/ENSMUSG00000029361/ENSMUSG00000028086/ENSMUSG00000024500/ENSMUSG00000006057/ENSMUSG00000063142/ENSMUSG00000028416/ENSMUSG00000005575/ENSMUSG00000021285	18
813	Down	GO:0032418	lysosome localization	13/1598	76/21087	0.004412491	0.042773484	0.036563661	ENSMUSG00000035953/ENSMUSG00000026797/ENSMUSG00000031840/ENSMUSG00000018634/ENSMUSG00000021194/ENSMUSG00000025867/ENSMUSG00000018736/ENSMUSG00000034579/ENSMUSG00000074811/ENSMUSG00000055407/ENSMUSG00000045176/ENSMUSG00000063077/ENSMUSG00000042992	13
814	Down	GO:1903531	negative regulation of secretion by cell	30/1598	239/21087	0.004428465	0.042875597	0.036650948	ENSMUSG00000042429/ENSMUSG00000021684/ENSMUSG00000023017/ENSMUSG00000018634/ENSMUSG00000029073/ENSMUSG00000051343/ENSMUSG00000054459/ENSMUSG00000028445/ENSMUSG00000096146/ENSMUSG00000026179/ENSMUSG00000028161/ENSMUSG00000021647/ENSMUSG00000037098/ENSMUSG00000021194/ENSMUSG00000020635/ENSMUSG00000031548/ENSMUSG00000040687/ENSMUSG00000040136/ENSMUSG00000050556/ENSMUSG00000024462/ENSMUSG00000017631/…	30
815	Down	GO:0046578	regulation of Ras protein signal transduction	29/1598	229/21087	0.004481938	0.043340066	0.037047987	ENSMUSG00000024277/ENSMUSG00000021708/ENSMUSG00000040797/ENSMUSG00000025499/ENSMUSG00000031442/ENSMUSG00000029673/ENSMUSG00000032356/ENSMUSG00000011877/ENSMUSG00000026697/ENSMUSG00000037126/ENSMUSG00000030685/ENSMUSG00000001507/ENSMUSG00000019467/ENSMUSG00000027581/ENSMUSG00000025656/ENSMUSG00000040687/ENSMUSG00000033389/ENSMUSG00000022883/ENSMUSG00000017631/ENSMUSG00000041115/ENSMUSG00000058230/…	29
816	Down	GO:0015748	organophosphate ester transport	16/1598	103/21087	0.004583018	0.044263192	0.037837094	ENSMUSG00000030688/ENSMUSG00000029073/ENSMUSG00000003341/ENSMUSG00000028982/ENSMUSG00000021983/ENSMUSG00000031633/ENSMUSG00000028125/ENSMUSG00000027546/ENSMUSG00000032193/ENSMUSG00000017781/ENSMUSG00000024566/ENSMUSG00000074968/ENSMUSG00000035189/ENSMUSG00000034793/ENSMUSG00000029406/ENSMUSG00000024851	16
817	Down	GO:0046942	carboxylic acid transport	36/1598	302/21087	0.004630074	0.044662931	0.038178799	ENSMUSG00000042429/ENSMUSG00000028542/ENSMUSG00000026797/ENSMUSG00000030209/ENSMUSG00000020366/ENSMUSG00000030688/ENSMUSG00000030310/ENSMUSG00000057531/ENSMUSG00000024897/ENSMUSG00000024462/ENSMUSG00000027030/ENSMUSG00000057880/ENSMUSG00000039059/ENSMUSG00000034656/ENSMUSG00000038486/ENSMUSG00000032883/ENSMUSG00000032532/ENSMUSG00000020333/ENSMUSG00000020681/ENSMUSG00000030495/ENSMUSG00000022462/…	36
818	Down	GO:0007189	adenylate cyclase-activating G protein-coupled receptor signaling pathway	19/1598	131/21087	0.00464184	0.044721684	0.038229022	ENSMUSG00000024524/ENSMUSG00000027584/ENSMUSG00000022840/ENSMUSG00000030666/ENSMUSG00000018634/ENSMUSG00000005580/ENSMUSG00000034730/ENSMUSG00000030669/ENSMUSG00000024858/ENSMUSG00000021194/ENSMUSG00000013033/ENSMUSG00000057177/ENSMUSG00000029361/ENSMUSG00000020431/ENSMUSG00000050541/ENSMUSG00000020140/ENSMUSG00000028782/ENSMUSG00000006651/ENSMUSG00000057455	19
819	Down	GO:0090257	regulation of muscle system process	30/1598	240/21087	0.004704381	0.0452689	0.038696794	ENSMUSG00000042429/ENSMUSG00000019997/ENSMUSG00000022812/ENSMUSG00000021313/ENSMUSG00000028991/ENSMUSG00000030669/ENSMUSG00000024858/ENSMUSG00000024065/ENSMUSG00000061603/ENSMUSG00000028161/ENSMUSG00000021194/ENSMUSG00000020635/ENSMUSG00000057177/ENSMUSG00000040136/ENSMUSG00000079055/ENSMUSG00000030043/ENSMUSG00000028854/ENSMUSG00000057880/ENSMUSG00000050541/ENSMUSG00000071657/ENSMUSG00000031633/…	30
820	Down	GO:0021684	cerebellar granular layer formation	4/1598	10/21087	0.004758947	0.045516094	0.0389081	ENSMUSG00000031654/ENSMUSG00000029512/ENSMUSG00000030302/ENSMUSG00000066129	4
821	Down	GO:0021707	cerebellar granule cell differentiation	4/1598	10/21087	0.004758947	0.045516094	0.0389081	ENSMUSG00000031654/ENSMUSG00000029512/ENSMUSG00000030302/ENSMUSG00000066129	4
822	Down	GO:0098700	neurotransmitter loading into synaptic vesicle	4/1598	10/21087	0.004758947	0.045516094	0.0389081	ENSMUSG00000100241/ENSMUSG00000029219/ENSMUSG00000037771/ENSMUSG00000030500	4
823	Down	GO:1904526	regulation of microtubule binding	4/1598	10/21087	0.004758947	0.045516094	0.0389081	ENSMUSG00000090100/ENSMUSG00000015222/ENSMUSG00000024969/ENSMUSG00000029166	4
824	Down	GO:2000302	positive regulation of synaptic vesicle exocytosis	4/1598	10/21087	0.004758947	0.045516094	0.0389081	ENSMUSG00000041670/ENSMUSG00000024743/ENSMUSG00000045114/ENSMUSG00000026452	4
825	Down	GO:1902531	regulation of intracellular signal transduction	160/1598	1735/21087	0.004773389	0.04559888	0.038978867	ENSMUSG00000017737/ENSMUSG00000020099/ENSMUSG00000036585/ENSMUSG00000024277/ENSMUSG00000042429/ENSMUSG00000024524/ENSMUSG00000033208/ENSMUSG00000021708/ENSMUSG00000035953/ENSMUSG00000027223/ENSMUSG00000027584/ENSMUSG00000031748/ENSMUSG00000022619/ENSMUSG00000006575/ENSMUSG00000034997/ENSMUSG00000000296/ENSMUSG00000030209/ENSMUSG00000001366/ENSMUSG00000025151/ENSMUSG00000020366/ENSMUSG00000040133/…	160
826	Down	GO:0060080	inhibitory postsynaptic potential	6/1598	22/21087	0.004861614	0.046329358	0.039603295	ENSMUSG00000041670/ENSMUSG00000027577/ENSMUSG00000000263/ENSMUSG00000051790/ENSMUSG00000057880/ENSMUSG00000066607	6
827	Down	GO:1902307	positive regulation of sodium ion transmembrane transport	6/1598	22/21087	0.004861614	0.046329358	0.039603295	ENSMUSG00000028854/ENSMUSG00000029361/ENSMUSG00000037989/ENSMUSG00000069601/ENSMUSG00000029359/ENSMUSG00000026576	6
828	Down	GO:0015849	organic acid transport	36/1598	303/21087	0.004881987	0.046467321	0.039721229	ENSMUSG00000042429/ENSMUSG00000028542/ENSMUSG00000026797/ENSMUSG00000030209/ENSMUSG00000020366/ENSMUSG00000030688/ENSMUSG00000030310/ENSMUSG00000057531/ENSMUSG00000024897/ENSMUSG00000024462/ENSMUSG00000027030/ENSMUSG00000057880/ENSMUSG00000039059/ENSMUSG00000034656/ENSMUSG00000038486/ENSMUSG00000032883/ENSMUSG00000032532/ENSMUSG00000020333/ENSMUSG00000020681/ENSMUSG00000030495/ENSMUSG00000022462/…	36
829	Down	GO:0042982	amyloid precursor protein metabolic process	11/1598	60/21087	0.004962168	0.04711668	0.040276314	ENSMUSG00000031837/ENSMUSG00000029126/ENSMUSG00000057177/ENSMUSG00000006930/ENSMUSG00000028039/ENSMUSG00000042846/ENSMUSG00000026833/ENSMUSG00000034926/ENSMUSG00000020740/ENSMUSG00000027489/ENSMUSG00000042066	11
830	Down	GO:0046847	filopodium assembly	11/1598	60/21087	0.004962168	0.04711668	0.040276314	ENSMUSG00000006435/ENSMUSG00000035863/ENSMUSG00000009292/ENSMUSG00000038976/ENSMUSG00000022099/ENSMUSG00000037509/ENSMUSG00000025920/ENSMUSG00000032827/ENSMUSG00000024501/ENSMUSG00000040265/ENSMUSG00000020758	11
831	Down	GO:0033137	negative regulation of peptidyl-serine phosphorylation	7/1598	29/21087	0.005018359	0.047421692	0.040537045	ENSMUSG00000024858/ENSMUSG00000055725/ENSMUSG00000042105/ENSMUSG00000022099/ENSMUSG00000029361/ENSMUSG00000034570/ENSMUSG00000026181	7
832	Down	GO:0051589	negative regulation of neurotransmitter transport	7/1598	29/21087	0.005018359	0.047421692	0.040537045	ENSMUSG00000023017/ENSMUSG00000026179/ENSMUSG00000024462/ENSMUSG00000029361/ENSMUSG00000057880/ENSMUSG00000032827/ENSMUSG00000039059	7
833	Down	GO:0097345	mitochondrial outer membrane permeabilization	7/1598	29/21087	0.005018359	0.047421692	0.040537045	ENSMUSG00000017897/ENSMUSG00000022812/ENSMUSG00000078566/ENSMUSG00000049422/ENSMUSG00000057177/ENSMUSG00000054428/ENSMUSG00000025733	7
834	Down	GO:1901018	positive regulation of potassium ion transmembrane transporter activity	7/1598	29/21087	0.005018359	0.047421692	0.040537045	ENSMUSG00000061603/ENSMUSG00000040136/ENSMUSG00000052374/ENSMUSG00000047976/ENSMUSG00000050947/ENSMUSG00000058975/ENSMUSG00000026576	7
835	Down	GO:1903169	regulation of calcium ion transmembrane transport	22/1598	161/21087	0.005086147	0.048004704	0.041035416	ENSMUSG00000027584/ENSMUSG00000021313/ENSMUSG00000018634/ENSMUSG00000032011/ENSMUSG00000024065/ENSMUSG00000061603/ENSMUSG00000045038/ENSMUSG00000020635/ENSMUSG00000025318/ENSMUSG00000006930/ENSMUSG00000004035/ENSMUSG00000028854/ENSMUSG00000034656/ENSMUSG00000033788/ENSMUSG00000028785/ENSMUSG00000051331/ENSMUSG00000020882/ENSMUSG00000035640/ENSMUSG00000017400/ENSMUSG00000038473/ENSMUSG00000020577/…	22
836	Down	GO:0001662	behavioral fear response	10/1598	52/21087	0.005100071	0.048078542	0.041098534	ENSMUSG00000021684/ENSMUSG00000022619/ENSMUSG00000030209/ENSMUSG00000023017/ENSMUSG00000022623/ENSMUSG00000030898/ENSMUSG00000032532/ENSMUSG00000020402/ENSMUSG00000028351/ENSMUSG00000055078	10
837	Down	GO:0010921	regulation of phosphatase activity	18/1598	123/21087	0.005243803	0.049374442	0.042206296	ENSMUSG00000020635/ENSMUSG00000038976/ENSMUSG00000036398/ENSMUSG00000068742/ENSMUSG00000039515/ENSMUSG00000024500/ENSMUSG00000052572/ENSMUSG00000044433/ENSMUSG00000048988/ENSMUSG00000033871/ENSMUSG00000060657/ENSMUSG00000069072/ENSMUSG00000035441/ENSMUSG00000038949/ENSMUSG00000043460/ENSMUSG00000051403/ENSMUSG00000029420/ENSMUSG00000062044	18
838	Down	GO:0043405	regulation of MAP kinase activity	35/1598	294/21087	0.005290916	0.049758602	0.042534684	ENSMUSG00000036585/ENSMUSG00000042429/ENSMUSG00000027223/ENSMUSG00000034997/ENSMUSG00000000296/ENSMUSG00000025151/ENSMUSG00000059146/ENSMUSG00000059981/ENSMUSG00000022812/ENSMUSG00000025499/ENSMUSG00000029223/ENSMUSG00000024948/ENSMUSG00000037887/ENSMUSG00000033618/ENSMUSG00000019828/ENSMUSG00000055471/ENSMUSG00000052539/ENSMUSG00000025793/ENSMUSG00000030110/ENSMUSG00000055725/ENSMUSG00000030854/…	35
839	Down	GO:0055117	regulation of cardiac muscle contraction	12/1598	69/21087	0.005325971	0.049917886	0.042670843	ENSMUSG00000042429/ENSMUSG00000019997/ENSMUSG00000021313/ENSMUSG00000024065/ENSMUSG00000061603/ENSMUSG00000021194/ENSMUSG00000020635/ENSMUSG00000028854/ENSMUSG00000050541/ENSMUSG00000051331/ENSMUSG00000032338/ENSMUSG00000026576	12
840	Down	GO:0030322	stabilization of membrane potential	5/1598	16/21087	0.005345857	0.049917886	0.042670843	ENSMUSG00000049422/ENSMUSG00000037624/ENSMUSG00000033998/ENSMUSG00000049265/ENSMUSG00000050138	5
841	Down	GO:0032252	secretory granule localization	5/1598	16/21087	0.005345857	0.049917886	0.042670843	ENSMUSG00000015222/ENSMUSG00000074657/ENSMUSG00000042766/ENSMUSG00000063077/ENSMUSG00000014602	5
842	Down	GO:0072350	tricarboxylic acid metabolic process	5/1598	16/21087	0.005345857	0.049917886	0.042670843	ENSMUSG00000005683/ENSMUSG00000020917/ENSMUSG00000027406/ENSMUSG00000022477/ENSMUSG00000032279	5
843	Down	GO:0106070	regulation of adenylate cyclase-activating G protein-coupled receptor signaling pathway	5/1598	16/21087	0.005345857	0.049917886	0.042670843	ENSMUSG00000027584/ENSMUSG00000024858/ENSMUSG00000057177/ENSMUSG00000029361/ENSMUSG00000006651	5
844	Down	GO:2000651	positive regulation of sodium ion transmembrane transporter activity	5/1598	16/21087	0.005345857	0.049917886	0.042670843	ENSMUSG00000028854/ENSMUSG00000037989/ENSMUSG00000069601/ENSMUSG00000029359/ENSMUSG00000026576	5
845	UP	GO:0002376	immune system process	474/1944	2373/21087	8.31E-67	8.28E-63	5.70E-63	ENSMUSG00000039323/ENSMUSG00000040249/ENSMUSG00000032508/ENSMUSG00000039239/ENSMUSG00000067377/ENSMUSG00000026395/ENSMUSG00000003873/ENSMUSG00000041324/ENSMUSG00000064326/ENSMUSG00000058099/ENSMUSG00000024404/ENSMUSG00000032554/ENSMUSG00000036943/ENSMUSG00000027639/ENSMUSG00000050953/ENSMUSG00000032216/ENSMUSG00000022831/ENSMUSG00000027660/ENSMUSG00000020075/ENSMUSG00000024610/ENSMUSG00000006932/…	474
846	UP	GO:0006950	response to stress	598/1944	3497/21087	4.05E-60	2.02E-56	1.39E-56	ENSMUSG00000038224/ENSMUSG00000056917/ENSMUSG00000040249/ENSMUSG00000030341/ENSMUSG00000032911/ENSMUSG00000032508/ENSMUSG00000070509/ENSMUSG00000039239/ENSMUSG00000031538/ENSMUSG00000089929/ENSMUSG00000067377/ENSMUSG00000026395/ENSMUSG00000026074/ENSMUSG00000003873/ENSMUSG00000047250/ENSMUSG00000028646/ENSMUSG00000038612/ENSMUSG00000060477/ENSMUSG00000030717/ENSMUSG00000041390/ENSMUSG00000031980/…	598
847	UP	GO:0048583	regulation of response to stimulus	622/1944	3871/21087	1.01E-52	3.35E-49	2.30E-49	ENSMUSG00000020282/ENSMUSG00000038224/ENSMUSG00000046223/ENSMUSG00000056917/ENSMUSG00000039323/ENSMUSG00000019505/ENSMUSG00000006728/ENSMUSG00000040249/ENSMUSG00000030341/ENSMUSG00000032911/ENSMUSG00000007656/ENSMUSG00000022025/ENSMUSG00000032508/ENSMUSG00000059291/ENSMUSG00000070509/ENSMUSG00000039239/ENSMUSG00000089929/ENSMUSG00000067377/ENSMUSG00000026395/ENSMUSG00000026074/ENSMUSG00000025154/…	622
848	UP	GO:0048518	positive regulation of biological process	855/1944	6106/21087	9.77E-50	2.43E-46	1.67E-46	ENSMUSG00000038224/ENSMUSG00000046223/ENSMUSG00000039323/ENSMUSG00000019505/ENSMUSG00000006728/ENSMUSG00000067786/ENSMUSG00000040249/ENSMUSG00000030341/ENSMUSG00000032911/ENSMUSG00000007656/ENSMUSG00000022025/ENSMUSG00000032508/ENSMUSG00000059291/ENSMUSG00000070509/ENSMUSG00000039239/ENSMUSG00000031538/ENSMUSG00000067377/ENSMUSG00000026395/ENSMUSG00000026074/ENSMUSG00000003873/ENSMUSG00000038508/…	855
849	UP	GO:0051239	regulation of multicellular organismal process	543/1944	3290/21087	1.91E-48	3.80E-45	2.62E-45	ENSMUSG00000038224/ENSMUSG00000006728/ENSMUSG00000040249/ENSMUSG00000030341/ENSMUSG00000032911/ENSMUSG00000022025/ENSMUSG00000032508/ENSMUSG00000070509/ENSMUSG00000039239/ENSMUSG00000031538/ENSMUSG00000067377/ENSMUSG00000026395/ENSMUSG00000026074/ENSMUSG00000003873/ENSMUSG00000038508/ENSMUSG00000041324/ENSMUSG00000047250/ENSMUSG00000085795/ENSMUSG00000029050/ENSMUSG00000043456/ENSMUSG00000030717/…	543
850	UP	GO:0002682	regulation of immune system process	282/1944	1297/21087	2.71E-45	4.50E-42	3.10E-42	ENSMUSG00000039323/ENSMUSG00000032508/ENSMUSG00000039239/ENSMUSG00000067377/ENSMUSG00000026395/ENSMUSG00000003873/ENSMUSG00000041324/ENSMUSG00000058099/ENSMUSG00000024404/ENSMUSG00000027639/ENSMUSG00000022831/ENSMUSG00000020075/ENSMUSG00000024610/ENSMUSG00000006932/ENSMUSG00000007815/ENSMUSG00000004266/ENSMUSG00000052229/ENSMUSG00000037411/ENSMUSG00000021756/ENSMUSG00000019850/ENSMUSG00000063632/…	282
851	UP	GO:0006952	defense response	301/1944	1435/21087	3.97E-45	5.65E-42	3.89E-42	ENSMUSG00000038224/ENSMUSG00000040249/ENSMUSG00000030341/ENSMUSG00000032911/ENSMUSG00000032508/ENSMUSG00000067377/ENSMUSG00000026395/ENSMUSG00000047250/ENSMUSG00000060477/ENSMUSG00000030717/ENSMUSG00000031980/ENSMUSG00000024404/ENSMUSG00000027639/ENSMUSG00000050953/ENSMUSG00000015568/ENSMUSG00000025017/ENSMUSG00000020075/ENSMUSG00000024610/ENSMUSG00000021423/ENSMUSG00000004266/ENSMUSG00000029484/…	301
852	UP	GO:0008152	metabolic process	1256/1944	10511/21087	3.45E-43	4.29E-40	2.95E-40	ENSMUSG00000020282/ENSMUSG00000038224/ENSMUSG00000046223/ENSMUSG00000030681/ENSMUSG00000019505/ENSMUSG00000006728/ENSMUSG00000040249/ENSMUSG00000030341/ENSMUSG00000032911/ENSMUSG00000007656/ENSMUSG00000032508/ENSMUSG00000059291/ENSMUSG00000070509/ENSMUSG00000039239/ENSMUSG00000031538/ENSMUSG00000067377/ENSMUSG00000026395/ENSMUSG00000026074/ENSMUSG00000003873/ENSMUSG00000038508/ENSMUSG00000041324/…	1256
853	UP	GO:0048522	positive regulation of cellular process	780/1944	5590/21087	4.33E-43	4.79E-40	3.30E-40	ENSMUSG00000038224/ENSMUSG00000046223/ENSMUSG00000039323/ENSMUSG00000019505/ENSMUSG00000006728/ENSMUSG00000067786/ENSMUSG00000040249/ENSMUSG00000030341/ENSMUSG00000032911/ENSMUSG00000007656/ENSMUSG00000032508/ENSMUSG00000059291/ENSMUSG00000070509/ENSMUSG00000039239/ENSMUSG00000026395/ENSMUSG00000026074/ENSMUSG00000003873/ENSMUSG00000038508/ENSMUSG00000041324/ENSMUSG00000064326/ENSMUSG00000028646/…	780
854	UP	GO:0006955	immune response	283/1944	1338/21087	5.01E-43	4.99E-40	3.43E-40	ENSMUSG00000040249/ENSMUSG00000032508/ENSMUSG00000039239/ENSMUSG00000026395/ENSMUSG00000003873/ENSMUSG00000058099/ENSMUSG00000024404/ENSMUSG00000027639/ENSMUSG00000032216/ENSMUSG00000020075/ENSMUSG00000024610/ENSMUSG00000021423/ENSMUSG00000004266/ENSMUSG00000029484/ENSMUSG00000052229/ENSMUSG00000019850/ENSMUSG00000024927/ENSMUSG00000027995/ENSMUSG00000031875/ENSMUSG00000034855/ENSMUSG00000044827/…	283
855	UP	GO:0048584	positive regulation of response to stimulus	388/1944	2139/21087	1.17E-42	1.06E-39	7.27E-40	ENSMUSG00000038224/ENSMUSG00000046223/ENSMUSG00000019505/ENSMUSG00000040249/ENSMUSG00000030341/ENSMUSG00000032911/ENSMUSG00000007656/ENSMUSG00000032508/ENSMUSG00000059291/ENSMUSG00000039239/ENSMUSG00000026395/ENSMUSG00000026074/ENSMUSG00000003873/ENSMUSG00000038508/ENSMUSG00000041324/ENSMUSG00000064326/ENSMUSG00000028646/ENSMUSG00000038612/ENSMUSG00000030717/ENSMUSG00000041390/ENSMUSG00000031980/…	388
856	UP	GO:0051240	positive regulation of multicellular organismal process	364/1944	1952/21087	1.39E-42	1.16E-39	7.95E-40	ENSMUSG00000038224/ENSMUSG00000040249/ENSMUSG00000030341/ENSMUSG00000022025/ENSMUSG00000032508/ENSMUSG00000070509/ENSMUSG00000039239/ENSMUSG00000031538/ENSMUSG00000067377/ENSMUSG00000026395/ENSMUSG00000026074/ENSMUSG00000003873/ENSMUSG00000041324/ENSMUSG00000047250/ENSMUSG00000085795/ENSMUSG00000031980/ENSMUSG00000058099/ENSMUSG00000024404/ENSMUSG00000020932/ENSMUSG00000032554/ENSMUSG00000036943/…	364
857	UP	GO:0001816	cytokine production	195/1944	768/21087	4.92E-41	3.77E-38	2.59E-38	ENSMUSG00000038224/ENSMUSG00000040249/ENSMUSG00000030341/ENSMUSG00000032508/ENSMUSG00000039239/ENSMUSG00000067377/ENSMUSG00000026395/ENSMUSG00000031980/ENSMUSG00000058099/ENSMUSG00000024404/ENSMUSG00000022500/ENSMUSG00000015568/ENSMUSG00000021709/ENSMUSG00000029994/ENSMUSG00000020075/ENSMUSG00000024610/ENSMUSG00000004266/ENSMUSG00000037411/ENSMUSG00000019850/ENSMUSG00000024927/ENSMUSG00000027995/…	195
858	UP	GO:0001775	cell activation	226/1944	974/21087	9.23E-41	6.57E-38	4.52E-38	ENSMUSG00000039323/ENSMUSG00000040249/ENSMUSG00000032508/ENSMUSG00000026395/ENSMUSG00000003873/ENSMUSG00000031980/ENSMUSG00000058099/ENSMUSG00000050953/ENSMUSG00000032216/ENSMUSG00000024610/ENSMUSG00000006932/ENSMUSG00000007815/ENSMUSG00000004266/ENSMUSG00000029484/ENSMUSG00000021756/ENSMUSG00000019850/ENSMUSG00000063632/ENSMUSG00000027995/ENSMUSG00000034855/ENSMUSG00000044827/ENSMUSG00000002985/…	226
859	UP	GO:0006954	inflammatory response	179/1944	681/21087	7.82E-40	5.19E-37	3.57E-37	ENSMUSG00000038224/ENSMUSG00000040249/ENSMUSG00000030341/ENSMUSG00000032911/ENSMUSG00000032508/ENSMUSG00000047250/ENSMUSG00000060477/ENSMUSG00000030717/ENSMUSG00000031980/ENSMUSG00000050953/ENSMUSG00000015568/ENSMUSG00000025017/ENSMUSG00000021423/ENSMUSG00000052229/ENSMUSG00000037411/ENSMUSG00000019850/ENSMUSG00000024927/ENSMUSG00000027995/ENSMUSG00000034855/ENSMUSG00000044827/ENSMUSG00000002985/…	179
860	UP	GO:0009987	cellular process	1720/1944	16313/21087	1.30E-39	8.07E-37	5.56E-37	ENSMUSG00000020282/ENSMUSG00000038224/ENSMUSG00000046223/ENSMUSG00000030681/ENSMUSG00000056917/ENSMUSG00000039323/ENSMUSG00000019505/ENSMUSG00000006728/ENSMUSG00000067786/ENSMUSG00000040249/ENSMUSG00000030341/ENSMUSG00000032911/ENSMUSG00000007656/ENSMUSG00000022025/ENSMUSG00000032508/ENSMUSG00000059291/ENSMUSG00000070509/ENSMUSG00000039239/ENSMUSG00000031538/ENSMUSG00000089929/ENSMUSG00000067377/…	1720
861	UP	GO:0051179	localization	818/1944	6094/21087	5.37E-39	3.14E-36	2.16E-36	ENSMUSG00000020282/ENSMUSG00000019505/ENSMUSG00000067786/ENSMUSG00000040249/ENSMUSG00000030341/ENSMUSG00000032911/ENSMUSG00000032508/ENSMUSG00000059291/ENSMUSG00000039239/ENSMUSG00000031538/ENSMUSG00000026395/ENSMUSG00000026074/ENSMUSG00000003873/ENSMUSG00000041324/ENSMUSG00000064326/ENSMUSG00000047250/ENSMUSG00000085795/ENSMUSG00000030717/ENSMUSG00000041390/ENSMUSG00000031980/ENSMUSG00000020932/…	818
862	UP	GO:0071704	organic substance metabolic process	1199/1944	10078/21087	3.45E-38	1.91E-35	1.31E-35	ENSMUSG00000020282/ENSMUSG00000038224/ENSMUSG00000046223/ENSMUSG00000030681/ENSMUSG00000019505/ENSMUSG00000006728/ENSMUSG00000040249/ENSMUSG00000030341/ENSMUSG00000032911/ENSMUSG00000007656/ENSMUSG00000032508/ENSMUSG00000059291/ENSMUSG00000070509/ENSMUSG00000039239/ENSMUSG00000031538/ENSMUSG00000067377/ENSMUSG00000026395/ENSMUSG00000026074/ENSMUSG00000003873/ENSMUSG00000038508/ENSMUSG00000041324/…	1199
863	UP	GO:0050793	regulation of developmental process	450/1944	2749/21087	4.61E-38	2.42E-35	1.66E-35	ENSMUSG00000038224/ENSMUSG00000006728/ENSMUSG00000040249/ENSMUSG00000030341/ENSMUSG00000032911/ENSMUSG00000022025/ENSMUSG00000070509/ENSMUSG00000039239/ENSMUSG00000026395/ENSMUSG00000026074/ENSMUSG00000003873/ENSMUSG00000038508/ENSMUSG00000041324/ENSMUSG00000085795/ENSMUSG00000029050/ENSMUSG00000043456/ENSMUSG00000030717/ENSMUSG00000031980/ENSMUSG00000058099/ENSMUSG00000020932/ENSMUSG00000032554/…	450
864	UP	GO:0035556	intracellular signal transduction	432/1944	2613/21087	1.99E-37	9.89E-35	6.81E-35	ENSMUSG00000038224/ENSMUSG00000046223/ENSMUSG00000056917/ENSMUSG00000019505/ENSMUSG00000040249/ENSMUSG00000030341/ENSMUSG00000032911/ENSMUSG00000007656/ENSMUSG00000032508/ENSMUSG00000059291/ENSMUSG00000039239/ENSMUSG00000089929/ENSMUSG00000067377/ENSMUSG00000026395/ENSMUSG00000026074/ENSMUSG00000025154/ENSMUSG00000003873/ENSMUSG00000038508/ENSMUSG00000041324/ENSMUSG00000028646/ENSMUSG00000038612/…	432
865	UP	GO:0045321	leukocyte activation	203/1944	867/21087	3.65E-37	1.73E-34	1.19E-34	ENSMUSG00000039323/ENSMUSG00000032508/ENSMUSG00000026395/ENSMUSG00000003873/ENSMUSG00000058099/ENSMUSG00000050953/ENSMUSG00000032216/ENSMUSG00000024610/ENSMUSG00000006932/ENSMUSG00000007815/ENSMUSG00000004266/ENSMUSG00000029484/ENSMUSG00000021756/ENSMUSG00000019850/ENSMUSG00000063632/ENSMUSG00000027995/ENSMUSG00000044827/ENSMUSG00000050335/ENSMUSG00000071005/ENSMUSG00000020143/ENSMUSG00000024978/…	203
866	UP	GO:1901564	organonitrogen compound metabolic process	814/1944	6122/21087	4.35E-37	1.97E-34	1.36E-34	ENSMUSG00000020282/ENSMUSG00000038224/ENSMUSG00000046223/ENSMUSG00000030681/ENSMUSG00000019505/ENSMUSG00000006728/ENSMUSG00000040249/ENSMUSG00000030341/ENSMUSG00000032911/ENSMUSG00000007656/ENSMUSG00000032508/ENSMUSG00000059291/ENSMUSG00000070509/ENSMUSG00000039239/ENSMUSG00000031538/ENSMUSG00000026395/ENSMUSG00000026074/ENSMUSG00000003873/ENSMUSG00000038508/ENSMUSG00000041324/ENSMUSG00000060477/…	814
867	UP	GO:0048523	negative regulation of cellular process	679/1944	4843/21087	1.54E-36	6.67E-34	4.59E-34	ENSMUSG00000020282/ENSMUSG00000038224/ENSMUSG00000046223/ENSMUSG00000030681/ENSMUSG00000006728/ENSMUSG00000040249/ENSMUSG00000030341/ENSMUSG00000032911/ENSMUSG00000007656/ENSMUSG00000022025/ENSMUSG00000032508/ENSMUSG00000059291/ENSMUSG00000070509/ENSMUSG00000039239/ENSMUSG00000031538/ENSMUSG00000089929/ENSMUSG00000067377/ENSMUSG00000026395/ENSMUSG00000026074/ENSMUSG00000003873/ENSMUSG00000038508/…	679
868	UP	GO:0016477	cell migration	284/1944	1459/21087	3.66E-36	1.52E-33	1.05E-33	ENSMUSG00000020282/ENSMUSG00000040249/ENSMUSG00000032911/ENSMUSG00000032508/ENSMUSG00000039239/ENSMUSG00000031538/ENSMUSG00000026395/ENSMUSG00000026074/ENSMUSG00000003873/ENSMUSG00000085795/ENSMUSG00000031980/ENSMUSG00000050953/ENSMUSG00000024544/ENSMUSG00000048779/ENSMUSG00000024610/ENSMUSG00000037225/ENSMUSG00000006932/ENSMUSG00000007815/ENSMUSG00000038387/ENSMUSG00000029484/ENSMUSG00000037411/…	284
869	UP	GO:0008219	cell death	366/1944	2101/21087	4.53E-36	1.80E-33	1.24E-33	ENSMUSG00000046223/ENSMUSG00000019505/ENSMUSG00000006728/ENSMUSG00000040249/ENSMUSG00000030341/ENSMUSG00000032508/ENSMUSG00000059291/ENSMUSG00000039239/ENSMUSG00000089929/ENSMUSG00000026395/ENSMUSG00000026074/ENSMUSG00000003873/ENSMUSG00000038508/ENSMUSG00000041324/ENSMUSG00000026875/ENSMUSG00000064326/ENSMUSG00000038612/ENSMUSG00000060477/ENSMUSG00000030717/ENSMUSG00000031980/ENSMUSG00000026637/…	366
870	UP	GO:0001817	regulation of cytokine production	173/1944	690/21087	1.20E-35	4.61E-33	3.17E-33	ENSMUSG00000038224/ENSMUSG00000040249/ENSMUSG00000030341/ENSMUSG00000032508/ENSMUSG00000039239/ENSMUSG00000067377/ENSMUSG00000026395/ENSMUSG00000031980/ENSMUSG00000058099/ENSMUSG00000024404/ENSMUSG00000022500/ENSMUSG00000015568/ENSMUSG00000021709/ENSMUSG00000029994/ENSMUSG00000020075/ENSMUSG00000024610/ENSMUSG00000004266/ENSMUSG00000037411/ENSMUSG00000019850/ENSMUSG00000024927/ENSMUSG00000027995/…	173
871	UP	GO:0048519	negative regulation of biological process	731/1944	5370/21087	1.46E-35	5.38E-33	3.71E-33	ENSMUSG00000020282/ENSMUSG00000038224/ENSMUSG00000046223/ENSMUSG00000030681/ENSMUSG00000006728/ENSMUSG00000040249/ENSMUSG00000030341/ENSMUSG00000032911/ENSMUSG00000007656/ENSMUSG00000022025/ENSMUSG00000032508/ENSMUSG00000059291/ENSMUSG00000070509/ENSMUSG00000039239/ENSMUSG00000031538/ENSMUSG00000089929/ENSMUSG00000067377/ENSMUSG00000026395/ENSMUSG00000026074/ENSMUSG00000003873/ENSMUSG00000038508/…	731
872	UP	GO:0009966	regulation of signal transduction	463/1944	2925/21087	1.72E-35	6.11E-33	4.21E-33	ENSMUSG00000020282/ENSMUSG00000038224/ENSMUSG00000046223/ENSMUSG00000056917/ENSMUSG00000039323/ENSMUSG00000019505/ENSMUSG00000006728/ENSMUSG00000040249/ENSMUSG00000030341/ENSMUSG00000032911/ENSMUSG00000007656/ENSMUSG00000022025/ENSMUSG00000032508/ENSMUSG00000059291/ENSMUSG00000070509/ENSMUSG00000039239/ENSMUSG00000089929/ENSMUSG00000067377/ENSMUSG00000026395/ENSMUSG00000026074/ENSMUSG00000025154/…	463
873	UP	GO:0070887	cellular response to chemical stimulus	483/1944	3100/21087	2.04E-35	7.01E-33	4.83E-33	ENSMUSG00000056917/ENSMUSG00000006728/ENSMUSG00000040249/ENSMUSG00000030341/ENSMUSG00000022025/ENSMUSG00000032508/ENSMUSG00000070509/ENSMUSG00000039239/ENSMUSG00000026395/ENSMUSG00000026074/ENSMUSG00000003873/ENSMUSG00000038508/ENSMUSG00000041324/ENSMUSG00000028646/ENSMUSG00000038612/ENSMUSG00000085795/ENSMUSG00000029050/ENSMUSG00000060477/ENSMUSG00000031980/ENSMUSG00000029096/ENSMUSG00000024404/…	483
874	UP	GO:0008283	cell population proliferation	354/1944	2021/21087	2.63E-35	8.73E-33	6.01E-33	ENSMUSG00000020282/ENSMUSG00000038224/ENSMUSG00000030681/ENSMUSG00000039323/ENSMUSG00000006728/ENSMUSG00000040249/ENSMUSG00000032911/ENSMUSG00000022025/ENSMUSG00000032508/ENSMUSG00000039239/ENSMUSG00000026395/ENSMUSG00000003873/ENSMUSG00000041324/ENSMUSG00000047250/ENSMUSG00000085795/ENSMUSG00000029050/ENSMUSG00000030717/ENSMUSG00000031980/ENSMUSG00000026637/ENSMUSG00000020932/ENSMUSG00000032554/…	354
875	UP	GO:0002684	positive regulation of immune system process	198/1944	861/21087	4.43E-35	1.42E-32	9.79E-33	ENSMUSG00000039323/ENSMUSG00000032508/ENSMUSG00000039239/ENSMUSG00000026395/ENSMUSG00000003873/ENSMUSG00000041324/ENSMUSG00000058099/ENSMUSG00000024404/ENSMUSG00000022831/ENSMUSG00000020075/ENSMUSG00000024610/ENSMUSG00000007815/ENSMUSG00000004266/ENSMUSG00000037411/ENSMUSG00000021756/ENSMUSG00000024927/ENSMUSG00000027995/ENSMUSG00000031875/ENSMUSG00000034855/ENSMUSG00000050335/ENSMUSG00000071005/…	198
876	UP	GO:0009605	response to external stimulus	424/1944	2612/21087	9.91E-35	3.08E-32	2.12E-32	ENSMUSG00000038224/ENSMUSG00000056917/ENSMUSG00000006728/ENSMUSG00000040249/ENSMUSG00000030341/ENSMUSG00000032508/ENSMUSG00000070509/ENSMUSG00000039239/ENSMUSG00000067377/ENSMUSG00000026395/ENSMUSG00000038508/ENSMUSG00000028646/ENSMUSG00000060477/ENSMUSG00000030717/ENSMUSG00000031980/ENSMUSG00000024404/ENSMUSG00000032554/ENSMUSG00000022500/ENSMUSG00000027639/ENSMUSG00000050953/ENSMUSG00000040093/…	424
877	UP	GO:0032879	regulation of localization	452/1944	2859/21087	2.09E-34	6.31E-32	4.34E-32	ENSMUSG00000020282/ENSMUSG00000067786/ENSMUSG00000040249/ENSMUSG00000030341/ENSMUSG00000032508/ENSMUSG00000039239/ENSMUSG00000026395/ENSMUSG00000026074/ENSMUSG00000003873/ENSMUSG00000041324/ENSMUSG00000064326/ENSMUSG00000047250/ENSMUSG00000085795/ENSMUSG00000041390/ENSMUSG00000031980/ENSMUSG00000020932/ENSMUSG00000032554/ENSMUSG00000036943/ENSMUSG00000050953/ENSMUSG00000024544/ENSMUSG00000039474/…	452
878	UP	GO:0048731	system development	662/1944	4757/21087	2.59E-34	7.59E-32	5.22E-32	ENSMUSG00000038224/ENSMUSG00000046223/ENSMUSG00000019505/ENSMUSG00000006728/ENSMUSG00000067786/ENSMUSG00000040249/ENSMUSG00000030341/ENSMUSG00000032911/ENSMUSG00000022025/ENSMUSG00000070509/ENSMUSG00000039239/ENSMUSG00000026395/ENSMUSG00000026074/ENSMUSG00000003873/ENSMUSG00000041324/ENSMUSG00000047250/ENSMUSG00000085795/ENSMUSG00000029050/ENSMUSG00000043456/ENSMUSG00000030717/ENSMUSG00000031980/…	662
879	UP	GO:0012501	programmed cell death	341/1944	1941/21087	3.47E-34	9.86E-32	6.78E-32	ENSMUSG00000046223/ENSMUSG00000019505/ENSMUSG00000006728/ENSMUSG00000040249/ENSMUSG00000030341/ENSMUSG00000032508/ENSMUSG00000059291/ENSMUSG00000039239/ENSMUSG00000089929/ENSMUSG00000026395/ENSMUSG00000026074/ENSMUSG00000003873/ENSMUSG00000038508/ENSMUSG00000041324/ENSMUSG00000026875/ENSMUSG00000064326/ENSMUSG00000038612/ENSMUSG00000060477/ENSMUSG00000030717/ENSMUSG00000031980/ENSMUSG00000026637/…	341
880	UP	GO:0007166	cell surface receptor signaling pathway	405/1944	2466/21087	3.56E-34	9.86E-32	6.78E-32	ENSMUSG00000020282/ENSMUSG00000046223/ENSMUSG00000030681/ENSMUSG00000039323/ENSMUSG00000006728/ENSMUSG00000040249/ENSMUSG00000030341/ENSMUSG00000032911/ENSMUSG00000022025/ENSMUSG00000032508/ENSMUSG00000070509/ENSMUSG00000039239/ENSMUSG00000031538/ENSMUSG00000089929/ENSMUSG00000026395/ENSMUSG00000003873/ENSMUSG00000038508/ENSMUSG00000041324/ENSMUSG00000026875/ENSMUSG00000064326/ENSMUSG00000038612/…	405
881	UP	GO:0048870	cell motility	297/1944	1607/21087	1.44E-33	3.77E-31	2.60E-31	ENSMUSG00000020282/ENSMUSG00000040249/ENSMUSG00000032911/ENSMUSG00000032508/ENSMUSG00000039239/ENSMUSG00000031538/ENSMUSG00000026395/ENSMUSG00000026074/ENSMUSG00000003873/ENSMUSG00000085795/ENSMUSG00000031980/ENSMUSG00000032554/ENSMUSG00000050953/ENSMUSG00000024544/ENSMUSG00000048779/ENSMUSG00000024610/ENSMUSG00000037225/ENSMUSG00000006932/ENSMUSG00000007815/ENSMUSG00000038387/ENSMUSG00000054793/…	297
882	UP	GO:0051674	localization of cell	297/1944	1607/21087	1.44E-33	3.77E-31	2.60E-31	ENSMUSG00000020282/ENSMUSG00000040249/ENSMUSG00000032911/ENSMUSG00000032508/ENSMUSG00000039239/ENSMUSG00000031538/ENSMUSG00000026395/ENSMUSG00000026074/ENSMUSG00000003873/ENSMUSG00000085795/ENSMUSG00000031980/ENSMUSG00000032554/ENSMUSG00000050953/ENSMUSG00000024544/ENSMUSG00000048779/ENSMUSG00000024610/ENSMUSG00000037225/ENSMUSG00000006932/ENSMUSG00000007815/ENSMUSG00000038387/ENSMUSG00000054793/…	297
883	UP	GO:0042221	response to chemical	598/1944	4191/21087	2.11E-33	5.40E-31	3.71E-31	ENSMUSG00000056917/ENSMUSG00000006728/ENSMUSG00000067786/ENSMUSG00000040249/ENSMUSG00000030341/ENSMUSG00000022025/ENSMUSG00000032508/ENSMUSG00000070509/ENSMUSG00000039239/ENSMUSG00000026395/ENSMUSG00000026074/ENSMUSG00000003873/ENSMUSG00000038508/ENSMUSG00000041324/ENSMUSG00000028646/ENSMUSG00000038612/ENSMUSG00000085795/ENSMUSG00000029050/ENSMUSG00000060477/ENSMUSG00000030717/ENSMUSG00000031980/…	598
884	UP	GO:0002252	immune effector process	177/1944	750/21087	7.31E-33	1.82E-30	1.25E-30	ENSMUSG00000040249/ENSMUSG00000032508/ENSMUSG00000039239/ENSMUSG00000067377/ENSMUSG00000026395/ENSMUSG00000024404/ENSMUSG00000027639/ENSMUSG00000020075/ENSMUSG00000024610/ENSMUSG00000004266/ENSMUSG00000029484/ENSMUSG00000019850/ENSMUSG00000027995/ENSMUSG00000034855/ENSMUSG00000050335/ENSMUSG00000071005/ENSMUSG00000020143/ENSMUSG00000024978/ENSMUSG00000050732/ENSMUSG00000022770/ENSMUSG00000020009/…	177
885	UP	GO:0007155	cell adhesion	256/1944	1309/21087	7.91E-33	1.92E-30	1.32E-30	ENSMUSG00000039323/ENSMUSG00000040249/ENSMUSG00000039239/ENSMUSG00000026395/ENSMUSG00000026074/ENSMUSG00000085795/ENSMUSG00000031980/ENSMUSG00000024610/ENSMUSG00000006932/ENSMUSG00000007815/ENSMUSG00000054793/ENSMUSG00000004266/ENSMUSG00000029484/ENSMUSG00000037411/ENSMUSG00000021756/ENSMUSG00000019850/ENSMUSG00000024927/ENSMUSG00000074637/ENSMUSG00000050335/ENSMUSG00000071005/ENSMUSG00000037815/…	256
886	UP	GO:0044237	cellular metabolic process	1117/1944	9413/21087	8.35E-33	1.98E-30	1.36E-30	ENSMUSG00000020282/ENSMUSG00000038224/ENSMUSG00000046223/ENSMUSG00000030681/ENSMUSG00000019505/ENSMUSG00000006728/ENSMUSG00000040249/ENSMUSG00000030341/ENSMUSG00000032911/ENSMUSG00000007656/ENSMUSG00000032508/ENSMUSG00000059291/ENSMUSG00000070509/ENSMUSG00000039239/ENSMUSG00000031538/ENSMUSG00000067377/ENSMUSG00000026395/ENSMUSG00000026074/ENSMUSG00000003873/ENSMUSG00000038508/ENSMUSG00000041324/…	1117
887	UP	GO:0022610	biological adhesion	257/1944	1321/21087	1.41E-32	3.27E-30	2.25E-30	ENSMUSG00000039323/ENSMUSG00000040249/ENSMUSG00000039239/ENSMUSG00000026395/ENSMUSG00000026074/ENSMUSG00000085795/ENSMUSG00000031980/ENSMUSG00000024610/ENSMUSG00000006932/ENSMUSG00000007815/ENSMUSG00000054793/ENSMUSG00000004266/ENSMUSG00000029484/ENSMUSG00000037411/ENSMUSG00000021756/ENSMUSG00000019850/ENSMUSG00000024927/ENSMUSG00000074637/ENSMUSG00000050335/ENSMUSG00000071005/ENSMUSG00000037815/…	257
888	UP	GO:0048856	anatomical structure development	771/1944	5871/21087	1.92E-32	4.24E-30	2.92E-30	ENSMUSG00000038224/ENSMUSG00000046223/ENSMUSG00000019505/ENSMUSG00000006728/ENSMUSG00000067786/ENSMUSG00000040249/ENSMUSG00000030341/ENSMUSG00000032911/ENSMUSG00000022025/ENSMUSG00000032508/ENSMUSG00000070509/ENSMUSG00000039239/ENSMUSG00000026395/ENSMUSG00000026074/ENSMUSG00000003873/ENSMUSG00000038508/ENSMUSG00000041324/ENSMUSG00000047250/ENSMUSG00000038612/ENSMUSG00000085795/ENSMUSG00000029050/…	771
889	UP	GO:0006915	apoptotic process	331/1944	1899/21087	1.94E-32	4.24E-30	2.92E-30	ENSMUSG00000046223/ENSMUSG00000019505/ENSMUSG00000006728/ENSMUSG00000040249/ENSMUSG00000030341/ENSMUSG00000032508/ENSMUSG00000059291/ENSMUSG00000039239/ENSMUSG00000089929/ENSMUSG00000026395/ENSMUSG00000026074/ENSMUSG00000003873/ENSMUSG00000038508/ENSMUSG00000041324/ENSMUSG00000026875/ENSMUSG00000064326/ENSMUSG00000038612/ENSMUSG00000060477/ENSMUSG00000030717/ENSMUSG00000031980/ENSMUSG00000026637/…	331
890	UP	GO:0032502	developmental process	817/1944	6325/21087	1.96E-32	4.24E-30	2.92E-30	ENSMUSG00000038224/ENSMUSG00000046223/ENSMUSG00000019505/ENSMUSG00000006728/ENSMUSG00000067786/ENSMUSG00000040249/ENSMUSG00000030341/ENSMUSG00000032911/ENSMUSG00000022025/ENSMUSG00000032508/ENSMUSG00000070509/ENSMUSG00000039239/ENSMUSG00000026395/ENSMUSG00000026074/ENSMUSG00000003873/ENSMUSG00000038508/ENSMUSG00000041324/ENSMUSG00000047250/ENSMUSG00000038612/ENSMUSG00000085795/ENSMUSG00000029050/…	817
891	UP	GO:0044093	positive regulation of molecular function	302/1944	1677/21087	4.85E-32	1.03E-29	7.07E-30	ENSMUSG00000046223/ENSMUSG00000040249/ENSMUSG00000032911/ENSMUSG00000032508/ENSMUSG00000059291/ENSMUSG00000070509/ENSMUSG00000039239/ENSMUSG00000067377/ENSMUSG00000026395/ENSMUSG00000026074/ENSMUSG00000003873/ENSMUSG00000038508/ENSMUSG00000026875/ENSMUSG00000029050/ENSMUSG00000060477/ENSMUSG00000041390/ENSMUSG00000031980/ENSMUSG00000026637/ENSMUSG00000058099/ENSMUSG00000024404/ENSMUSG00000032554/…	302
892	UP	GO:1902531	regulation of intracellular signal transduction	308/1944	1735/21087	1.54E-31	3.20E-29	2.21E-29	ENSMUSG00000038224/ENSMUSG00000046223/ENSMUSG00000056917/ENSMUSG00000019505/ENSMUSG00000040249/ENSMUSG00000032911/ENSMUSG00000007656/ENSMUSG00000032508/ENSMUSG00000059291/ENSMUSG00000039239/ENSMUSG00000089929/ENSMUSG00000067377/ENSMUSG00000026395/ENSMUSG00000026074/ENSMUSG00000025154/ENSMUSG00000003873/ENSMUSG00000038508/ENSMUSG00000041324/ENSMUSG00000028646/ENSMUSG00000038612/ENSMUSG00000030717/…	308
893	UP	GO:0065009	regulation of molecular function	437/1944	2809/21087	1.81E-31	3.68E-29	2.53E-29	ENSMUSG00000038224/ENSMUSG00000046223/ENSMUSG00000030681/ENSMUSG00000040249/ENSMUSG00000032911/ENSMUSG00000032508/ENSMUSG00000059291/ENSMUSG00000070509/ENSMUSG00000039239/ENSMUSG00000067377/ENSMUSG00000026395/ENSMUSG00000026074/ENSMUSG00000003873/ENSMUSG00000038508/ENSMUSG00000026875/ENSMUSG00000064326/ENSMUSG00000029050/ENSMUSG00000060477/ENSMUSG00000030717/ENSMUSG00000041390/ENSMUSG00000031980/…	437
894	UP	GO:0010941	regulation of cell death	305/1944	1715/21087	2.32E-31	4.62E-29	3.18E-29	ENSMUSG00000046223/ENSMUSG00000019505/ENSMUSG00000006728/ENSMUSG00000040249/ENSMUSG00000030341/ENSMUSG00000059291/ENSMUSG00000039239/ENSMUSG00000089929/ENSMUSG00000026395/ENSMUSG00000026074/ENSMUSG00000003873/ENSMUSG00000038508/ENSMUSG00000041324/ENSMUSG00000026875/ENSMUSG00000064326/ENSMUSG00000038612/ENSMUSG00000060477/ENSMUSG00000030717/ENSMUSG00000031980/ENSMUSG00000026637/ENSMUSG00000050953/…	305
895	UP	GO:0019538	protein metabolic process	705/1944	5271/21087	2.40E-31	4.69E-29	3.23E-29	ENSMUSG00000020282/ENSMUSG00000038224/ENSMUSG00000046223/ENSMUSG00000030681/ENSMUSG00000019505/ENSMUSG00000006728/ENSMUSG00000040249/ENSMUSG00000030341/ENSMUSG00000032911/ENSMUSG00000007656/ENSMUSG00000032508/ENSMUSG00000059291/ENSMUSG00000070509/ENSMUSG00000039239/ENSMUSG00000031538/ENSMUSG00000026395/ENSMUSG00000026074/ENSMUSG00000003873/ENSMUSG00000038508/ENSMUSG00000041324/ENSMUSG00000060477/…	705
896	UP	GO:0042127	regulation of cell population proliferation	299/1944	1671/21087	3.36E-31	6.44E-29	4.43E-29	ENSMUSG00000038224/ENSMUSG00000039323/ENSMUSG00000006728/ENSMUSG00000022025/ENSMUSG00000032508/ENSMUSG00000039239/ENSMUSG00000026395/ENSMUSG00000003873/ENSMUSG00000041324/ENSMUSG00000047250/ENSMUSG00000085795/ENSMUSG00000029050/ENSMUSG00000030717/ENSMUSG00000031980/ENSMUSG00000026637/ENSMUSG00000020932/ENSMUSG00000032554/ENSMUSG00000050953/ENSMUSG00000022831/ENSMUSG00000048779/ENSMUSG00000024610/…	299
897	UP	GO:0023051	regulation of signaling	523/1944	3586/21087	6.51E-31	1.22E-28	8.42E-29	ENSMUSG00000020282/ENSMUSG00000038224/ENSMUSG00000046223/ENSMUSG00000030681/ENSMUSG00000056917/ENSMUSG00000039323/ENSMUSG00000019505/ENSMUSG00000006728/ENSMUSG00000067786/ENSMUSG00000040249/ENSMUSG00000030341/ENSMUSG00000032911/ENSMUSG00000007656/ENSMUSG00000022025/ENSMUSG00000032508/ENSMUSG00000059291/ENSMUSG00000070509/ENSMUSG00000039239/ENSMUSG00000031538/ENSMUSG00000089929/ENSMUSG00000067377/…	523
898	UP	GO:0030154	cell differentiation	594/1944	4237/21087	6.82E-31	1.26E-28	8.65E-29	ENSMUSG00000038224/ENSMUSG00000046223/ENSMUSG00000019505/ENSMUSG00000040249/ENSMUSG00000030341/ENSMUSG00000032911/ENSMUSG00000022025/ENSMUSG00000032508/ENSMUSG00000070509/ENSMUSG00000039239/ENSMUSG00000026395/ENSMUSG00000026074/ENSMUSG00000003873/ENSMUSG00000038508/ENSMUSG00000041324/ENSMUSG00000047250/ENSMUSG00000038612/ENSMUSG00000085795/ENSMUSG00000029050/ENSMUSG00000043456/ENSMUSG00000030717/…	594
899	UP	GO:0044238	primary metabolic process	1104/1944	9369/21087	1.24E-30	2.24E-28	1.54E-28	ENSMUSG00000020282/ENSMUSG00000038224/ENSMUSG00000046223/ENSMUSG00000030681/ENSMUSG00000019505/ENSMUSG00000006728/ENSMUSG00000040249/ENSMUSG00000030341/ENSMUSG00000032911/ENSMUSG00000007656/ENSMUSG00000032508/ENSMUSG00000059291/ENSMUSG00000070509/ENSMUSG00000039239/ENSMUSG00000031538/ENSMUSG00000067377/ENSMUSG00000026395/ENSMUSG00000026074/ENSMUSG00000003873/ENSMUSG00000038508/ENSMUSG00000041324/…	1104
900	UP	GO:0009653	anatomical structure morphogenesis	428/1944	2757/21087	1.55E-30	2.76E-28	1.90E-28	ENSMUSG00000038224/ENSMUSG00000019505/ENSMUSG00000040249/ENSMUSG00000030341/ENSMUSG00000032911/ENSMUSG00000022025/ENSMUSG00000070509/ENSMUSG00000039239/ENSMUSG00000026074/ENSMUSG00000003873/ENSMUSG00000038508/ENSMUSG00000041324/ENSMUSG00000029050/ENSMUSG00000031980/ENSMUSG00000050953/ENSMUSG00000032216/ENSMUSG00000027660/ENSMUSG00000037225/ENSMUSG00000046020/ENSMUSG00000006932/ENSMUSG00000025555/…	428
901	UP	GO:0040011	locomotion	313/1944	1800/21087	2.18E-30	3.80E-28	2.62E-28	ENSMUSG00000020282/ENSMUSG00000040249/ENSMUSG00000032911/ENSMUSG00000032508/ENSMUSG00000039239/ENSMUSG00000031538/ENSMUSG00000026395/ENSMUSG00000026074/ENSMUSG00000003873/ENSMUSG00000085795/ENSMUSG00000031980/ENSMUSG00000032554/ENSMUSG00000050953/ENSMUSG00000024544/ENSMUSG00000048779/ENSMUSG00000024610/ENSMUSG00000037225/ENSMUSG00000006932/ENSMUSG00000007815/ENSMUSG00000038387/ENSMUSG00000054793/…	313
902	UP	GO:0010033	response to organic substance	467/1944	3112/21087	4.74E-30	8.13E-28	5.60E-28	ENSMUSG00000006728/ENSMUSG00000067786/ENSMUSG00000040249/ENSMUSG00000030341/ENSMUSG00000022025/ENSMUSG00000032508/ENSMUSG00000070509/ENSMUSG00000039239/ENSMUSG00000026395/ENSMUSG00000026074/ENSMUSG00000003873/ENSMUSG00000038508/ENSMUSG00000041324/ENSMUSG00000028646/ENSMUSG00000038612/ENSMUSG00000085795/ENSMUSG00000029050/ENSMUSG00000060477/ENSMUSG00000031980/ENSMUSG00000029096/ENSMUSG00000024404/…	467
903	UP	GO:0010646	regulation of cell communication	518/1944	3571/21087	5.86E-30	9.89E-28	6.80E-28	ENSMUSG00000020282/ENSMUSG00000038224/ENSMUSG00000046223/ENSMUSG00000056917/ENSMUSG00000039323/ENSMUSG00000019505/ENSMUSG00000006728/ENSMUSG00000067786/ENSMUSG00000040249/ENSMUSG00000030341/ENSMUSG00000032911/ENSMUSG00000007656/ENSMUSG00000022025/ENSMUSG00000032508/ENSMUSG00000059291/ENSMUSG00000070509/ENSMUSG00000039239/ENSMUSG00000031538/ENSMUSG00000089929/ENSMUSG00000067377/ENSMUSG00000026395/…	518
904	UP	GO:0043067	regulation of programmed cell death	282/1944	1566/21087	7.81E-30	1.30E-27	8.92E-28	ENSMUSG00000046223/ENSMUSG00000019505/ENSMUSG00000006728/ENSMUSG00000040249/ENSMUSG00000030341/ENSMUSG00000059291/ENSMUSG00000039239/ENSMUSG00000089929/ENSMUSG00000026395/ENSMUSG00000026074/ENSMUSG00000003873/ENSMUSG00000038508/ENSMUSG00000041324/ENSMUSG00000026875/ENSMUSG00000064326/ENSMUSG00000038612/ENSMUSG00000060477/ENSMUSG00000030717/ENSMUSG00000031980/ENSMUSG00000026637/ENSMUSG00000050953/…	282
905	UP	GO:0045595	regulation of cell differentiation	327/1944	1928/21087	9.62E-30	1.57E-27	1.08E-27	ENSMUSG00000038224/ENSMUSG00000040249/ENSMUSG00000030341/ENSMUSG00000032911/ENSMUSG00000070509/ENSMUSG00000039239/ENSMUSG00000026395/ENSMUSG00000026074/ENSMUSG00000038508/ENSMUSG00000041324/ENSMUSG00000085795/ENSMUSG00000029050/ENSMUSG00000043456/ENSMUSG00000031980/ENSMUSG00000058099/ENSMUSG00000020932/ENSMUSG00000032554/ENSMUSG00000024544/ENSMUSG00000032216/ENSMUSG00000015568/ENSMUSG00000022831/…	327
906	UP	GO:0051246	regulation of protein metabolic process	421/1944	2720/21087	1.08E-29	1.73E-27	1.19E-27	ENSMUSG00000020282/ENSMUSG00000038224/ENSMUSG00000046223/ENSMUSG00000030681/ENSMUSG00000019505/ENSMUSG00000006728/ENSMUSG00000040249/ENSMUSG00000030341/ENSMUSG00000032911/ENSMUSG00000007656/ENSMUSG00000032508/ENSMUSG00000059291/ENSMUSG00000070509/ENSMUSG00000039239/ENSMUSG00000031538/ENSMUSG00000026395/ENSMUSG00000026074/ENSMUSG00000003873/ENSMUSG00000038508/ENSMUSG00000041324/ENSMUSG00000030717/…	421
907	UP	GO:0009893	positive regulation of metabolic process	529/1944	3682/21087	1.30E-29	2.06E-27	1.42E-27	ENSMUSG00000038224/ENSMUSG00000046223/ENSMUSG00000006728/ENSMUSG00000040249/ENSMUSG00000030341/ENSMUSG00000032911/ENSMUSG00000007656/ENSMUSG00000032508/ENSMUSG00000059291/ENSMUSG00000070509/ENSMUSG00000039239/ENSMUSG00000067377/ENSMUSG00000026395/ENSMUSG00000026074/ENSMUSG00000003873/ENSMUSG00000038508/ENSMUSG00000041324/ENSMUSG00000029050/ENSMUSG00000030717/ENSMUSG00000041390/ENSMUSG00000031980/…	529
908	UP	GO:0048869	cellular developmental process	601/1944	4348/21087	1.44E-29	2.24E-27	1.54E-27	ENSMUSG00000038224/ENSMUSG00000046223/ENSMUSG00000019505/ENSMUSG00000040249/ENSMUSG00000030341/ENSMUSG00000032911/ENSMUSG00000022025/ENSMUSG00000032508/ENSMUSG00000070509/ENSMUSG00000039239/ENSMUSG00000026395/ENSMUSG00000026074/ENSMUSG00000003873/ENSMUSG00000038508/ENSMUSG00000041324/ENSMUSG00000047250/ENSMUSG00000038612/ENSMUSG00000085795/ENSMUSG00000029050/ENSMUSG00000043456/ENSMUSG00000030717/…	601
909	UP	GO:2000145	regulation of cell motility	198/1944	944/21087	2.20E-29	3.37E-27	2.32E-27	ENSMUSG00000040249/ENSMUSG00000032508/ENSMUSG00000039239/ENSMUSG00000026395/ENSMUSG00000026074/ENSMUSG00000085795/ENSMUSG00000031980/ENSMUSG00000032554/ENSMUSG00000024544/ENSMUSG00000048779/ENSMUSG00000024610/ENSMUSG00000037225/ENSMUSG00000007815/ENSMUSG00000038387/ENSMUSG00000054793/ENSMUSG00000029484/ENSMUSG00000037411/ENSMUSG00000021756/ENSMUSG00000027995/ENSMUSG00000034855/ENSMUSG00000032562/…	198
910	UP	GO:0080134	regulation of response to stress	245/1944	1290/21087	2.30E-29	3.47E-27	2.39E-27	ENSMUSG00000038224/ENSMUSG00000040249/ENSMUSG00000030341/ENSMUSG00000032508/ENSMUSG00000070509/ENSMUSG00000039239/ENSMUSG00000067377/ENSMUSG00000026074/ENSMUSG00000003873/ENSMUSG00000038612/ENSMUSG00000030717/ENSMUSG00000041390/ENSMUSG00000031980/ENSMUSG00000024404/ENSMUSG00000032554/ENSMUSG00000027639/ENSMUSG00000050953/ENSMUSG00000039474/ENSMUSG00000015568/ENSMUSG00000027660/ENSMUSG00000025017/…	245
911	UP	GO:0030155	regulation of cell adhesion	162/1944	697/21087	2.68E-29	3.98E-27	2.74E-27	ENSMUSG00000039323/ENSMUSG00000040249/ENSMUSG00000039239/ENSMUSG00000026395/ENSMUSG00000026074/ENSMUSG00000085795/ENSMUSG00000024610/ENSMUSG00000007815/ENSMUSG00000004266/ENSMUSG00000037411/ENSMUSG00000021756/ENSMUSG00000019850/ENSMUSG00000024927/ENSMUSG00000074637/ENSMUSG00000050335/ENSMUSG00000071005/ENSMUSG00000032494/ENSMUSG00000037820/ENSMUSG00000024978/ENSMUSG00000026249/ENSMUSG00000022770/…	162
912	UP	GO:0051270	regulation of cellular component movement	209/1944	1033/21087	8.81E-29	1.29E-26	8.88E-27	ENSMUSG00000040249/ENSMUSG00000032508/ENSMUSG00000039239/ENSMUSG00000026395/ENSMUSG00000026074/ENSMUSG00000085795/ENSMUSG00000031980/ENSMUSG00000032554/ENSMUSG00000024544/ENSMUSG00000048779/ENSMUSG00000024610/ENSMUSG00000037225/ENSMUSG00000007815/ENSMUSG00000038387/ENSMUSG00000054793/ENSMUSG00000029484/ENSMUSG00000037411/ENSMUSG00000021756/ENSMUSG00000027995/ENSMUSG00000034855/ENSMUSG00000032562/…	209
913	UP	GO:0019222	regulation of metabolic process	788/1944	6204/21087	2.81E-28	4.06E-26	2.79E-26	ENSMUSG00000020282/ENSMUSG00000038224/ENSMUSG00000046223/ENSMUSG00000030681/ENSMUSG00000019505/ENSMUSG00000006728/ENSMUSG00000040249/ENSMUSG00000030341/ENSMUSG00000032911/ENSMUSG00000007656/ENSMUSG00000032508/ENSMUSG00000059291/ENSMUSG00000070509/ENSMUSG00000039239/ENSMUSG00000031538/ENSMUSG00000067377/ENSMUSG00000026395/ENSMUSG00000026074/ENSMUSG00000003873/ENSMUSG00000038508/ENSMUSG00000041324/…	788
914	UP	GO:0051094	positive regulation of developmental process	276/1944	1556/21087	4.40E-28	6.27E-26	4.31E-26	ENSMUSG00000038224/ENSMUSG00000040249/ENSMUSG00000030341/ENSMUSG00000070509/ENSMUSG00000039239/ENSMUSG00000026395/ENSMUSG00000003873/ENSMUSG00000038508/ENSMUSG00000041324/ENSMUSG00000085795/ENSMUSG00000031980/ENSMUSG00000020932/ENSMUSG00000032554/ENSMUSG00000050953/ENSMUSG00000015568/ENSMUSG00000022831/ENSMUSG00000027660/ENSMUSG00000024610/ENSMUSG00000037225/ENSMUSG00000006932/ENSMUSG00000007815/…	276
915	UP	GO:0051247	positive regulation of protein metabolic process	290/1944	1669/21087	5.24E-28	7.34E-26	5.05E-26	ENSMUSG00000038224/ENSMUSG00000046223/ENSMUSG00000006728/ENSMUSG00000040249/ENSMUSG00000030341/ENSMUSG00000032911/ENSMUSG00000032508/ENSMUSG00000070509/ENSMUSG00000039239/ENSMUSG00000026395/ENSMUSG00000026074/ENSMUSG00000003873/ENSMUSG00000038508/ENSMUSG00000041324/ENSMUSG00000030717/ENSMUSG00000041390/ENSMUSG00000031980/ENSMUSG00000032554/ENSMUSG00000050953/ENSMUSG00000039474/ENSMUSG00000032216/…	290
916	UP	GO:0042981	regulation of apoptotic process	274/1944	1544/21087	6.60E-28	9.13E-26	6.28E-26	ENSMUSG00000046223/ENSMUSG00000019505/ENSMUSG00000006728/ENSMUSG00000040249/ENSMUSG00000030341/ENSMUSG00000059291/ENSMUSG00000039239/ENSMUSG00000089929/ENSMUSG00000026395/ENSMUSG00000026074/ENSMUSG00000003873/ENSMUSG00000038508/ENSMUSG00000041324/ENSMUSG00000026875/ENSMUSG00000064326/ENSMUSG00000038612/ENSMUSG00000060477/ENSMUSG00000030717/ENSMUSG00000031980/ENSMUSG00000026637/ENSMUSG00000050953/…	274
917	UP	GO:0030334	regulation of cell migration	188/1944	897/21087	7.25E-28	9.89E-26	6.81E-26	ENSMUSG00000040249/ENSMUSG00000032508/ENSMUSG00000039239/ENSMUSG00000026395/ENSMUSG00000026074/ENSMUSG00000085795/ENSMUSG00000031980/ENSMUSG00000024544/ENSMUSG00000048779/ENSMUSG00000024610/ENSMUSG00000037225/ENSMUSG00000007815/ENSMUSG00000038387/ENSMUSG00000029484/ENSMUSG00000037411/ENSMUSG00000021756/ENSMUSG00000027995/ENSMUSG00000034855/ENSMUSG00000032562/ENSMUSG00000002985/ENSMUSG00000050335/…	188
[truncated: 2,332 more rows]
